# Supplementary material for: Identification of mechanistic CKD biomarkers in a rat SNx kidney fibrosis model by transcriptomics and proteomics detectable in biofluids
Source: Sci Rep. 2025 Apr 2;15:11200. doi: 10.1038/s41598-025-93894-6 (PMC11962143; doi:10.1038/s41598-025-93894-6)
Supplement: Supplementary file 2 — Supplementary Information 2. [file 41598_2025_93894_MOESM2_ESM.xlsx]

## Sheet: Manuscript title and authors
Identification of mechanistic CKD biomarkers in rat SNx kidney fibrosis model by transcriptomics and proteomics detectable in biofluids.
Karin Barnouin, Elisa Tonoli, Clare Coveney, John Atkinson, Margarida Sancho, Andrew Skelton, David J Boocock, Linghong Huang, Joseph Shephard, Tim Johnson, Elisabetta AM Verderio, and Breda Twomey
Supplementary data 1: Transcriptomics and Proteomics Fold Change analysis

## Sheet: Study1_transcrip_kidney_limma
ensgene	logFC	AveExpr	t	P.Value	adj.P.Val	B	symbol	chr	description	ensgene_human	symbol_human	Ortho_Conf	entrez	AvExp__SNx	AvExp__NoOp
ENSRNOG00000006094	3.00295	5.48216	23.6503	9.18292e-09	0.000101505	10.9047	Cd44	3	CD44 molecule (Indian blood group)	ENSG00000026508	CD44	1	960	6.9772	3.98711
ENSRNOG00000016460	4.68546	8.56253	20.8515	2.50939e-08	0.000101505	9.89937	Clu	15	clusterin	ENSG00000120885	CLU	1	1191	10.8181	6.30695
ENSRNOG00000021256	5.55511	3.00223	21.2536	2.15509e-08	0.000101505	8.73888	Adra1d	3	adrenoceptor alpha 1D	ENSG00000171873	ADRA1D	1	146	5.72481	0.279645
ENSRNOG00000001607	2.86502	7.43845	19.7225	3.9082e-08	0.000107402	9.57911	Adamts1	11	ADAM metallopeptidase with thrombospondin type 1 motif, 1	ENSG00000154734	ADAMTS1	1	9510	8.87869	5.99821
ENSRNOG00000002403	2.75377	5.01395	19.4165	4.42531e-08	0.000107402	9.43763	Fam129a	13	family with sequence similarity 129, member A	ENSG00000135842	NIBAN1	1	116496	6.42575	3.60215
ENSRNOG00000019627	2.40925	4.53792	18.1061	7.70481e-08	0.000137705	8.89176	Mybpc2	1	myosin binding protein C, fast-type	ENSG00000086967	MYBPC2	1	4606	5.7462	3.32963
ENSRNOG00000043451	5.28353	10.3229	18.0365	7.94341e-08	0.000137705	8.7225	Spp1	14	secreted phosphoprotein 1	ENSG00000118785	SPP1	1	6696	12.8979	7.74793
ENSRNOG00000003546	2.88048	5.05576	16.611	1.52316e-07	0.000200026	8.24726	Tnfrsf12a	10	TNF receptor superfamily member 12A	ENSG00000006327	TNFRSF12A	1	51330	6.47442	3.6371
ENSRNOG00000008849	2.66722	4.12691	16.5359	1.57862e-07	0.000200026	8.16704	Guca2a	5	guanylate cyclase activator 2A	ENSG00000197273	GUCA2A	1	2980	5.4274	2.82642
ENSRNOG00000025691	3.28485	4.32279	15.9154	2.13403e-07	0.000200026	7.87725	Pla2g7	9	phospholipase A2 group VII	ENSG00000146070	PLA2G7	1	7941	5.92726	2.71831
ENSRNOG00000000805	2.60546	5.27857	15.7584	2.30713e-07	0.000200026	7.83523	Gja1	20	gap junction protein, alpha 1	ENSG00000152661	GJA1	1	2697	6.57318	3.98396
ENSRNOG00000001476	2.12293	5.8533	15.581	2.52209e-07	0.000200026	7.73356	Cldn4	12	claudin 4	ENSG00000189143	CLDN4	1	1364	6.90591	4.8007
ENSRNOG00000012094	4.79586	4.5247	15.5607	2.54805e-07	0.000200026	7.65541	Ltbp2	6	latent transforming growth factor beta binding protein 2	ENSG00000119681	LTBP2	1	4053	6.85737	2.19204
ENSRNOG00000013167	1.92371	4.13024	15.3737	2.80218e-07	0.000200026	7.63651	Hmgb2l1	16	high mobility group box 2-like 1	ENSG00000164104	HMGB2	1	3148	5.1099	3.15058
ENSRNOG00000025571	7.98615	-0.516289	15.9013	2.14892e-07	0.000200026	5.83649	Il19	13	interleukin 19	ENSG00000142224	IL19	1	29949	3.43946	-4.47203
ENSRNOG00000004470	7.54961	-0.0993793	15.3761	2.79867e-07	0.000200026	5.74313	Il24	13	interleukin 24	ENSG00000162892	IL24	1	11009	3.74875	-3.94751
ENSRNOG00000013612	6.47881	-1.24224	15.5003	2.62727e-07	0.000200026	5.45196	Crisp1	9	cysteine-rich secretory protein 1	ENSG00000124812	CRISP1	1	167	1.98756	-4.47203
ENSRNOG00000014424	2.53238	5.37081	15.1276	3.18069e-07	0.000203146	7.51015	RGD1563354	3	similar to hypothetical protein D630003M21	ENSG00000149633	KIAA1755	1	85449	6.64366	4.09796
ENSRNOG00000046848	3.11026	3.8181	15.2203	3.03185e-07	0.000203146	7.50457	PCOLCE2	8	procollagen C-endopeptidase enhancer 2	ENSG00000163710	PCOLCE2	1	26577	5.30067	2.33552
ENSRNOG00000000443	3.15738	8.62512	14.8146	3.74765e-07	0.000219052	7.35583	C4a	20	complement component 4A (Rodgers blood group)	ENSG00000224389	C4B	1	721	10.1429	7.10735
ENSRNOG00000000443	3.15738	8.62512	14.8146	3.74765e-07	0.000219052	7.35583	C4a	20	complement component 4A (Rodgers blood group)	ENSG00000244731	C4A	1	720	10.1429	7.10735
ENSRNOG00000000443	3.15738	8.62512	14.8146	3.74765e-07	0.000219052	7.35583	C4a	20	complement component 4A (Rodgers blood group)	ENSG00000244731	C4A	1	110384692	10.1429	7.10735
ENSRNOG00000004626	2.40548	7.22672	14.6947	3.99414e-07	0.000219052	7.27112	Slc34a2	14	solute carrier family 34 member 2	ENSG00000157765	SLC34A2	1	10568	8.41125	6.04219
ENSRNOG00000042499	3.0152	7.83079	14.5704	4.26894e-07	0.000219052	7.21639	LOC100364435	4	thymosin, beta 10-like	ENSG00000034510	TMSB10	1	9168	9.26287	6.39872
ENSRNOG00000016825	2.02848	3.77119	14.543	4.3323e-07	0.000219052	7.19468	Cd3eap	1	CD3e molecule associated protein	ENSG00000117877	CD3EAP	1	10849	4.76694	2.77543
ENSRNOG00000013973	5.36187	4.19836	14.6612	4.06615e-07	0.000219052	7.15673	Lcn2	3	lipocalin 2	ENSG00000148346	LCN2	1	3934	6.99369	1.40303
ENSRNOG00000027784	-2.23307	4.70333	-14.3939	4.69631e-07	0.000227959	7.13003	Tsku	1	tsukushi, small leucine rich proteoglycan	ENSG00000182704	TSKU	1	25987	3.60014	5.80652
ENSRNOG00000016044	2.42044	5.78253	14.1723	5.30231e-07	0.000238309	6.97612	Mab21l3	2	mab-21 like 3	ENSG00000173212	MAB21L3	1	126868	6.95818	4.60689
ENSRNOG00000050420	8.54562	0.260114	14.1831	5.27085e-07	0.000238309	5.4625	Krt5	7	keratin 5	ENSG00000186081	KRT5	1	3852	4.34701	-3.82678
ENSRNOG00000033608	2.38139	4.83567	14.0414	5.70097e-07	0.000244195	6.92745	Cd276	8	Cd276 molecule	ENSG00000103855	CD276	1	80381	6.01351	3.65784
ENSRNOG00000001480	2.52394	4.3033	13.9388	6.03695e-07	0.000244195	6.88358	Ncf1	12	neutrophil cytosolic factor 1	ENSG00000158517	NCF1	1	653361	5.5889	3.01769
ENSRNOG00000000827	1.30668	5.53895	13.9519	5.99292e-07	0.000244195	6.83574	Ier3	20	immediate early response 3	ENSG00000137331	IER3	1	8870	6.19596	4.88194
ENSRNOG00000020580	2.03761	3.6935	13.7751	6.62015e-07	0.000252318	6.78355	LOC500956	8	hypothetical protein LOC500956	ENSG00000130813	SHFL	1	55337	4.72394	2.66307
ENSRNOG00000015906	1.77841	5.00489	13.6411	7.14468e-07	0.000252318	6.6813	Tgif1	9	TGFB-induced factor homeobox 1	ENSG00000177426	TGIF1	1	7050	5.87648	4.1333
ENSRNOG00000008117	-2.24428	7.15592	-13.5917	7.3493e-07	0.000252318	6.62447	Galnt11	4	polypeptide N-acetylgalactosaminyltransferase 11	ENSG00000178234	GALNT11	1	63917	6.06514	8.2467
ENSRNOG00000020206	2.25578	10.1956	13.4599	7.92879e-07	0.000252318	6.61366	Ctsd	1	cathepsin D	ENSG00000250644	AC068580.4	1	NA	11.2739	9.11731
ENSRNOG00000020206	2.25578	10.1956	13.4599	7.92879e-07	0.000252318	6.61366	Ctsd	1	cathepsin D	ENSG00000117984	CTSD	1	1509	11.2739	9.11731
ENSRNOG00000006330	1.82143	6.95959	13.5219	7.65029e-07	0.000252318	6.58657	Elf3	13	E74-like factor 3	ENSG00000163435	ELF3	1	1999	7.82921	6.08998
ENSRNOG00000008144	1.72074	5.12384	13.4885	7.79917e-07	0.000252318	6.58443	Irf1	10	interferon regulatory factor 1	ENSG00000125347	IRF1	1	3659	5.9607	4.28698
ENSRNOG00000011647	1.93167	5.62643	13.5012	7.74195e-07	0.000252318	6.57675	S100a6	2	S100 calcium binding protein A6	ENSG00000197956	S100A6	1	6277	6.58968	4.66318
ENSRNOG00000047393	1.71074	4.95213	13.4451	7.99736e-07	0.000252318	6.56728	Krt18	7	keratin 18	ENSG00000111057	KRT18	1	3875	5.78426	4.11999
ENSRNOG00000017511	2.20575	6.58887	13.4211	8.1091e-07	0.000252318	6.52767	Dcdc2	17	doublecortin domain containing 2	ENSG00000146038	DCDC2	1	51473	7.75174	5.42599
ENSRNOG00000010507	8.26724	-0.292733	13.3637	8.38442e-07	0.000254362	5.16599	Mmp7	8	matrix metallopeptidase 7	ENSG00000137673	MMP7	1	4316	3.88657	-4.47203
ENSRNOG00000020164	4.51181	2.39489	13.2764	8.82277e-07	0.000261132	6.10558	Ifitm10	1	interferon induced transmembrane protein 10	ENSG00000244242	IFITM10	1	402778	4.6086	0.181175
ENSRNOG00000037853	-1.9647	5.07084	-13.2256	9.09012e-07	0.000262639	6.46145	Rarres1	2	retinoic acid receptor responder 1	ENSG00000118849	RARRES1	1	5918	4.10918	6.0325
ENSRNOG00000013496	6.39429	-1.32444	13.1528	9.48882e-07	0.000267783	4.81901	Crisp3	9	cysteine-rich secretory protein 3	ENSG00000096006	CRISP3	1	10321	1.82315	-4.47203
ENSRNOG00000001030	1.94441	9.45058	13.009	1.03345e-06	0.000272628	6.34182	Tsc22d1	15	TSC22 domain family, member 1	ENSG00000102804	TSC22D1	1	8848	10.3893	8.51188
ENSRNOG00000059947	2.59584	5.02162	13.0238	1.02436e-06	0.000272628	6.32533	Sdc1	6	syndecan 1	ENSG00000115884	SDC1	1	6382	6.26696	3.77628
ENSRNOG00000023708	2.02363	5.69528	13.0217	1.02568e-06	0.000272628	6.28436	Tmem176a	4	transmembrane protein 176A	ENSG00000002933	TMEM176A	1	55365	6.65215	4.73842
ENSRNOG00000018184	1.68913	8.2027	12.962	1.06291e-06	0.000274433	6.28039	Tpm1	8	tropomyosin 1, alpha	ENSG00000140416	TPM1	1	7168	9.03319	7.37222
ENSRNOG00000017854	2.07334	6.05684	12.8747	1.12015e-06	0.000281015	6.18686	Ucp2	1	uncoupling protein 2	ENSG00000175567	UCP2	1	7351	7.06801	5.04568
ENSRNOG00000002343	3.46357	2.91608	12.8533	1.13471e-06	0.000281015	6.12601	Uchl1	14	ubiquitin C-terminal hydrolase L1	ENSG00000154277	UCHL1	1	7345	4.59895	1.23321
ENSRNOG00000004500	2.34312	3.96797	12.813	1.16272e-06	0.000282193	6.23413	Myc	7	myelocytomatosis oncogene	ENSG00000136997	MYC	1	4609	5.20748	2.72847
ENSRNOG00000049766	3.62185	2.7482	12.7384	1.21659e-06	0.000289476	6.04238	Sctr	13	secretin receptor	ENSG00000080293	SCTR	1	6344	4.53169	0.964715
ENSRNOG00000050697	2.61361	5.62824	12.6537	1.28113e-06	0.000298972	6.06822	Ctsz	3	cathepsin Z	ENSG00000101160	CTSZ	1	1522	6.87837	4.3781
ENSRNOG00000014233	2.38934	5.53406	12.5244	1.38716e-06	0.000317606	5.9811	Krt19	10	keratin 19	ENSG00000171345	KRT19	1	3880	6.74382	4.3243
ENSRNOG00000003745	3.70087	3.19014	12.3906	1.50737e-06	0.000320579	5.92095	Atf3	13	activating transcription factor 3	ENSG00000162772	ATF3	1	467	4.9979	1.38237
ENSRNOG00000038881	2.04967	4.17152	12.2542	1.64209e-06	0.000320579	5.87881	Hcls1	11	hematopoietic cell specific Lyn substrate 1	ENSG00000180353	HCLS1	1	3059	5.16538	3.17767
ENSRNOG00000005175	-1.44331	5.7686	-12.3324	1.56324e-06	0.000320579	5.84629	Sgpp1	6	sphingosine-1-phosphate phosphatase 1	ENSG00000126821	SGPP1	1	81537	5.04533	6.49186
ENSRNOG00000019120	-2.80255	4.38211	-12.1594	1.74357e-06	0.000320579	5.83226	Hmgcs2	2	3-hydroxy-3-methylglutaryl-CoA synthase 2	ENSG00000134240	HMGCS2	1	3158	3.05393	5.71028
ENSRNOG00000017210	-1.61121	5.98599	-12.3222	1.57335e-06	0.000320579	5.83172	Slc22a23	17	solute carrier family 22, member 23	ENSG00000137266	SLC22A23	1	63027	5.17152	6.80045
ENSRNOG00000018087	2.73408	7.40566	12.2727	1.62308e-06	0.000320579	5.82669	Vim	17	vimentin	ENSG00000026025	VIM	1	7431	8.69306	6.11825
ENSRNOG00000017469	1.94728	7.62308	12.2724	1.62333e-06	0.000320579	5.82251	Anxa1	1	annexin A1	ENSG00000135046	ANXA1	1	301	8.57082	6.67534
ENSRNOG00000019430	2.50579	5.13439	12.1846	1.7159e-06	0.000320579	5.7826	Coro1a	1	coronin 1A	ENSG00000102879	CORO1A	1	11151	6.3403	3.92849
ENSRNOG00000010362	2.13901	7.07427	12.2149	1.68328e-06	0.000320579	5.77004	Anxa2	8	annexin A2	ENSG00000182718	ANXA2	1	302	8.11143	6.03711
ENSRNOG00000010105	2.1243	6.53829	12.1629	1.73967e-06	0.000320579	5.72572	S100a11	2	S100 calcium binding protein A11	ENSG00000163191	S100A11	1	6282	7.62508	5.45151
ENSRNOG00000013057	3.38498	1.91043	12.3587	1.5377e-06	0.000320579	5.63626	Prc1	1	protein regulator of cytokinesis 1	ENSG00000198901	PRC1	1	9055	3.62632	0.194535
ENSRNOG00000014714	5.67602	1.93753	12.2496	1.64683e-06	0.000320579	5.35385	Trpv6	4	transient receptor potential cation channel, subfamily V, member 6	ENSG00000165125	TRPV6	1	55503	4.81545	-0.94038
ENSRNOG00000008575	5.85598	-1.51788	12.4113	1.4881e-06	0.000320579	4.4386	Aoc1	4	amine oxidase, copper containing 1	ENSG00000002726	AOC1	1	26	1.43627	-4.47203
ENSRNOG00000000459	2.01686	4.28717	12.0796	1.83451e-06	0.000322635	5.75712	Psmb9	20	proteasome subunit beta 9	ENSG00000240065	PSMB9	1	5698	5.26417	3.31017
ENSRNOG00000033153	3.46569	2.91224	12.0908	1.82137e-06	0.000322635	5.70294	Sfn	5	stratifin	ENSG00000175793	SFN	1	2810	4.57451	1.24997
ENSRNOG00000016265	1.39759	6.41972	12.0941	1.81751e-06	0.000322635	5.66088	Acsl5	1	acyl-CoA synthetase long-chain family member 5	ENSG00000197142	ACSL5	1	51703	7.09777	5.74167
ENSRNOG00000024846	2.14865	3.79624	12.0236	1.90139e-06	0.000324976	5.74608	Ier5l	3	immediate early response 5-like	ENSG00000188483	IER5L	1	389792	4.83661	2.75586
ENSRNOG00000003634	-2.00672	5.32938	-12.027	1.89726e-06	0.000324976	5.68743	Zfp354a	10	zinc finger protein 354A	ENSG00000169131	ZNF354A	1	6940	4.37675	6.28201
ENSRNOG00000017496	2.01723	5.01696	11.9634	1.97639e-06	0.000328542	5.62791	Cnp	10	2',3'-cyclic nucleotide 3' phosphodiesterase	ENSG00000173786	CNP	1	1267	5.98324	4.05069
ENSRNOG00000033734	5.26907	0.0160843	11.9731	1.96411e-06	0.000328542	4.53023	Tnnt2	13	troponin T2, cardiac type	ENSG00000118194	TNNT2	1	7139	2.62583	-2.59366
ENSRNOG00000013783	1.55448	5.99205	11.9403	2.0061e-06	0.000328973	5.56027	Efhd2	5	EF-hand domain family, member D2	ENSG00000142634	EFHD2	1	79180	6.72612	5.25798
ENSRNOG00000007951	-2.48309	4.25856	-11.9028	2.05532e-06	0.000332551	5.6718	Galnt14	6	polypeptide N-acetylgalactosaminyltransferase 14	ENSG00000158089	GALNT14	1	79623	3.03572	5.4814
ENSRNOG00000031163	3.18011	3.6193	11.8347	2.14818e-06	0.000334208	5.62582	Nfkbiz	11	NFKB inhibitor zeta	ENSG00000144802	NFKBIZ	1	64332	5.26753	1.97107
ENSRNOG00000030387	2.37425	4.45564	11.858	2.11591e-06	0.000334208	5.60781	Kng1	11	kininogen 1	ENSG00000113889	KNG1	1	3827	5.59595	3.31532
ENSRNOG00000013925	-2.08901	5.81292	-11.8411	2.13933e-06	0.000334208	5.53773	Nox4	1	NADPH oxidase 4	ENSG00000086991	NOX4	1	50507	4.80537	6.82046
ENSRNOG00000047367	2.82287	2.38436	11.7926	2.20796e-06	0.00033492	5.49422	Card14	10	caspase recruitment domain family, member 14	ENSG00000141527	CARD14	1	79092	3.88142	0.887305
ENSRNOG00000011032	1.4297	5.388	11.8044	2.19107e-06	0.00033492	5.48314	Lhfpl2	2	lipoma HMGIC fusion partner-like 2	ENSG00000145685	LHFPL2	1	10184	6.12257	4.65343
ENSRNOG00000023226	1.63561	6.54484	11.7636	2.25027e-06	0.000337123	5.4417	S100a10	2	S100 calcium binding protein A10	ENSG00000197747	S100A10	1	6281	7.32879	5.7609
ENSRNOG00000024159	2.02327	3.77724	11.6764	2.38275e-06	0.000352618	5.51977	Fcer1g	13	Fc fragment of IgE receptor Ig	ENSG00000158869	FCER1G	1	2207	4.73291	2.82156
ENSRNOG00000010694	2.57866	3.07191	11.6187	2.47528e-06	0.000361898	5.47554	Tpbg	8	trophoblast glycoprotein	ENSG00000146242	TPBG	1	7162	4.36748	1.77635
ENSRNOG00000005731	2.83697	3.88836	11.5971	2.51095e-06	0.000362742	5.46932	Birc3	8	baculoviral IAP repeat-containing 3	ENSG00000023445	BIRC3	1	330	5.32791	2.44882
ENSRNOG00000047247	2.3296	4.34746	11.5511	2.58876e-06	0.000369583	5.40681	Ptprs	9	protein tyrosine phosphatase, receptor type, S	ENSG00000105426	PTPRS	1	5802	5.48735	3.20757
ENSRNOG00000007778	3.23016	3.02489	11.4138	2.83757e-06	0.000393103	5.33629	Alox15b	10	arachidonate 15-lipoxygenase, type B	ENSG00000179593	ALOX15B	1	247	4.76564	1.28413
ENSRNOG00000000853	2.05245	4.11502	11.407	2.85069e-06	0.000393103	5.32003	Aif1	20	allograft inflammatory factor 1	ENSG00000204472	AIF1	1	199	5.06977	3.16026
ENSRNOG00000017197	1.17754	5.55613	11.4166	2.83235e-06	0.000393103	5.19815	Pdgfb	7	platelet derived growth factor subunit B	ENSG00000100311	PDGFB	1	5155	6.13991	4.97235
ENSRNOG00000009597	-2.8012	4.36329	-11.2394	3.19316e-06	0.000399474	5.2364	Cyp4a1	5	cytochrome P450, family 4, subfamily a, polypeptide 1	ENSG00000186204	CYP4F12	0	66002	2.96261	5.76397
ENSRNOG00000009597	-2.8012	4.36329	-11.2394	3.19316e-06	0.000399474	5.2364	Cyp4a1	5	cytochrome P450, family 4, subfamily a, polypeptide 1	ENSG00000187048	CYP4A11	1	1579	2.96261	5.76397
ENSRNOG00000009597	-2.8012	4.36329	-11.2394	3.19316e-06	0.000399474	5.2364	Cyp4a1	5	cytochrome P450, family 4, subfamily a, polypeptide 1	ENSG00000162365	CYP4A22	1	284541	2.96261	5.76397
ENSRNOG00000009597	-2.8012	4.36329	-11.2394	3.19316e-06	0.000399474	5.2364	Cyp4a1	5	cytochrome P450, family 4, subfamily a, polypeptide 1	ENSG00000171903	CYP4F11	0	57834	2.96261	5.76397
ENSRNOG00000013747	2.0745	4.17371	11.2565	3.15611e-06	0.000399474	5.20716	Sh3bp2	14	SH3-domain binding protein 2	ENSG00000087266	SH3BP2	1	6452	5.21755	3.12986
ENSRNOG00000010645	3.22593	5.67868	11.3303	3.00194e-06	0.000399474	5.19503	Lgals3	15	galectin 3	ENSG00000131981	LGALS3	1	3958	7.20929	4.14807
ENSRNOG00000016413	2.68617	2.37171	11.2812	3.10361e-06	0.000399474	5.18896	Pstpip1	8	proline-serine-threonine phosphatase-interacting protein 1	ENSG00000140368	PSTPIP1	1	9051	3.71626	1.02715
ENSRNOG00000010319	2.30995	5.94275	11.3175	3.02808e-06	0.000399474	5.14652	Lcp1	15	lymphocyte cytosolic protein 1	ENSG00000136167	LCP1	1	3936	7.05308	4.83241
ENSRNOG00000017777	-1.66687	6.9038	-11.3507	2.96081e-06	0.000399474	5.14533	Ahcy	3	adenosylhomocysteinase	ENSG00000101444	AHCY	1	191	6.04962	7.75797
ENSRNOG00000039496	1.63114	5.15817	11.2471	3.17653e-06	0.000399474	5.10756	Plp2	X	proteolipid protein 2	ENSG00000102007	PLP2	1	5355	5.94233	4.374
ENSRNOG00000008432	-2.2033	7.2941	-11.2732	3.1205e-06	0.000399474	5.10222	LOC303140	10	up-regulator of carnitine transporter, OCTN2	ENSG00000197375	SLC22A5	1	6584	6.19871	8.38949
ENSRNOG00000018903	1.55775	6.63054	11.2496	3.1711e-06	0.000399474	5.07693	Pik3r1	2	phosphoinositide-3-kinase regulatory subunit 1	ENSG00000145675	PIK3R1	1	5295	7.45814	5.80294
ENSRNOG00000033389	-1.99515	6.30612	-11.2213	3.23278e-06	0.000400304	5.07086	Susd2	20	sushi domain containing 2	ENSG00000099994	SUSD2	1	56241	5.26427	7.34798
ENSRNOG00000022054	-2.00107	6.26752	-11.1909	3.3008e-06	0.000403101	5.0509	Paqr7	5	progestin and adipoQ receptor family member 7	ENSG00000182749	PAQR7	1	164091	5.23562	7.29942
ENSRNOG00000056756	1.68097	5.9024	11.1816	3.32181e-06	0.000403101	5.02921	Actn1	6	actinin, alpha 1	ENSG00000072110	ACTN1	1	87	6.70403	5.10077
ENSRNOG00000051952	1.52836	5.10662	11.1178	3.47052e-06	0.000409505	5.01592	Tes	4	testin LIM domain protein	ENSG00000135269	TES	1	26136	5.85139	4.36186
ENSRNOG00000057404	-2.35789	7.49597	-11.1326	3.43525e-06	0.000409505	5.0049	Slc47a1	10	solute carrier family 47 member 1	ENSG00000142494	SLC47A1	1	55244	6.31538	8.67656
ENSRNOG00000020716	2.51368	6.12131	11.1156	3.47581e-06	0.000409505	5.00475	Axl	1	Axl receptor tyrosine kinase	ENSG00000167601	AXL	1	558	7.28467	4.95795
ENSRNOG00000017354	1.08913	6.24413	11.0758	3.5723e-06	0.00041388	4.9342	Zyx	4	zyxin	ENSG00000159840	ZYX	1	7791	6.76908	5.71918
ENSRNOG00000011875	1.08397	6.38026	11.0585	3.61527e-06	0.00041388	4.92222	Slc2a2	2	solute carrier family 2 member 2	ENSG00000163581	SLC2A2	1	6514	6.91201	5.84852
ENSRNOG00000022432	5.25069	-1.89768	11.0721	3.58153e-06	0.00041388	3.7859	Tmem59l	16	transmembrane protein 59-like	ENSG00000105696	TMEM59L	1	25789	0.676665	-4.47203
ENSRNOG00000005387	1.52935	6.26614	11.0256	3.69874e-06	0.000419479	4.9079	Rbm3	X	RNA binding motif (RNP1, RRM) protein 3	ENSG00000102317	RBM3	1	5935	7.04907	5.48321
ENSRNOG00000005214	2.52771	2.83972	10.9322	3.94707e-06	0.000432094	5.01744	Plek	14	pleckstrin	ENSG00000115956	PLEK	1	5341	4.08084	1.5986
ENSRNOG00000009963	1.43826	4.45516	10.9333	3.94396e-06	0.000432094	4.94029	Ctps1	5	CTP synthase 1	ENSG00000171793	CTPS1	1	1503	5.19795	3.71237
ENSRNOG00000047606	3.03677	2.11584	10.9302	3.9524e-06	0.000432094	4.89341	Bcl2a1	8	BCL2-related protein A1	ENSG00000140379	BCL2A1	1	597	3.52655	0.705133
ENSRNOG00000015654	-2.03413	6.46465	-10.9305	3.95164e-06	0.000432094	4.85418	Ghr	2	growth hormone receptor	ENSG00000112964	GHR	1	2690	5.46906	7.46024
ENSRNOG00000013653	1.94339	4.35607	10.8811	4.09062e-06	0.000435149	4.92357	Pdlim7	17	PDZ and LIM domain 7	ENSG00000196923	PDLIM7	1	9260	5.31987	3.39227
ENSRNOG00000053075	3.93509	2.56885	10.8602	4.1513e-06	0.000435149	4.90045	B4galnt4	1	beta-1,4-N-acetyl-galactosaminyl transferase 4	ENSG00000182272	B4GALNT4	1	338707	4.53588	0.601827
ENSRNOG00000017428	1.82231	4.80557	10.8805	4.09257e-06	0.000435149	4.87165	Map1b	2	microtubule-associated protein 1B	ENSG00000131711	MAP1B	1	4131	5.76151	3.84964
ENSRNOG00000017328	-2.02208	8.10052	-10.8573	4.15965e-06	0.000435149	4.823	Pter	17	phosphotriesterase related	ENSG00000165983	PTER	1	9317	7.08087	9.12017
ENSRNOG00000026371	5.7365	-1.70252	10.9015	4.03273e-06	0.000435149	3.84444	Krt17	10	keratin 17	ENSG00000128422	KRT17	1	3872	1.067	-4.47203
ENSRNOG00000005580	2.50376	5.34507	10.8223	4.26336e-06	0.000442187	4.81585	Itgb4	10	integrin subunit beta 4	ENSG00000132470	ITGB4	1	3691	6.55569	4.13446
ENSRNOG00000000640	3.9259	1.20653	10.7824	4.38534e-06	0.000450984	4.52201	Egr2	20	early growth response 2	ENSG00000122877	EGR2	1	1959	3.11719	-0.704137
ENSRNOG00000017980	1.67889	3.96817	10.7509	4.484e-06	0.000456005	4.85885	Itgal	1	integrin subunit alpha L	ENSG00000005844	ITGAL	1	3683	4.78897	3.14737
ENSRNOG00000018867	-1.39917	4.97059	-10.743	4.50932e-06	0.000456005	4.79024	Klhdc7a	5	kelch domain containing 7A	ENSG00000179023	KLHDC7A	1	127707	4.28873	5.65246
ENSRNOG00000003515	-1.64621	7.59813	-10.7041	4.63567e-06	0.000461097	4.68559	Ephx1	13	epoxide hydrolase 1	ENSG00000143819	EPHX1	1	2052	6.75563	8.44064
ENSRNOG00000029134	-1.07212	5.92562	-10.7143	4.60201e-06	0.000461097	4.68062	Adgrl1	19	adhesion G protein-coupled receptor L1	ENSG00000072071	ADGRL1	1	22859	5.40865	6.4426
ENSRNOG00000015157	1.30354	5.4181	10.6837	4.70355e-06	0.000464045	4.66711	Smtnl2	10	smoothelin-like 2	ENSG00000188176	SMTNL2	1	342527	6.08116	4.75505
ENSRNOG00000029726	1.95838	5.08003	10.6596	4.78515e-06	0.00046522	4.68863	Gstm1	2	glutathione S-transferase mu 1	ENSG00000134184	GSTM1	1	2944	6.04871	4.11135
ENSRNOG00000018019	-1.38998	5.90035	-10.6464	4.83046e-06	0.00046522	4.64177	Hspa12a	1	heat shock protein family A (Hsp70) member 12A	ENSG00000165868	HSPA12A	1	259217	5.23526	6.56544
ENSRNOG00000019357	1.32865	6.1578	10.6514	4.81328e-06	0.00046522	4.62116	Tax1bp3	10	Tax1 binding protein 3	ENSG00000213977	TAX1BP3	1	30851	6.78324	5.53236
ENSRNOG00000004327	-3.18779	5.3279	-10.5632	5.12743e-06	0.000486104	4.70653	Ddc	14	dopa decarboxylase	ENSG00000132437	DDC	1	1644	3.72587	6.92993
ENSRNOG00000003217	2.36999	6.36096	10.5652	5.12029e-06	0.000486104	4.58708	Lgals3bp	10	galectin 3 binding protein	ENSG00000108679	LGALS3BP	1	3959	7.49857	5.22336
ENSRNOG00000008915	-3.62155	4.87475	-10.5391	5.21737e-06	0.000487021	4.74045	Prima1	6	proline rich membrane anchor 1	ENSG00000175785	PRIMA1	1	145270	3.21481	6.5347
ENSRNOG00000007364	1.43939	4.45772	10.5451	5.19491e-06	0.000487021	4.64976	Rab15	6	RAB15, member RAS oncogene family	ENSG00000139998	RAB15	1	376267	5.20791	3.70753
ENSRNOG00000017445	1.78201	4.11827	10.5145	5.31106e-06	0.000491983	4.67339	Tubb2b	17	tubulin, beta 2B class IIb	ENSG00000137285	TUBB2B	1	347733	4.95633	3.28021
ENSRNOG00000054251	2.90654	3.22024	10.441	5.60185e-06	0.000496193	4.68354	Clec7a	4	C-type lectin domain family 7, member A	ENSG00000172243	CLEC7A	1	64581	4.59775	1.84272
ENSRNOG00000018003	1.61594	3.90685	10.4459	5.58178e-06	0.000496193	4.63586	F2rl1	2	F2R like trypsin receptor 1	ENSG00000164251	F2RL1	1	2150	4.7015	3.11219
ENSRNOG00000005935	2.71259	4.44865	10.4721	5.47649e-06	0.000496193	4.63385	A3galt2	5	alpha 1,3-galactosyltransferase 2	ENSG00000184389	A3GALT2	1	127550	5.75248	3.14482
ENSRNOG00000013520	-2.31633	8.84465	-10.4423	5.59628e-06	0.000496193	4.54525	Mat2a	4	methionine adenosyltransferase 2A	ENSG00000168906	MAT2A	1	4144	7.73324	9.95606
ENSRNOG00000003622	2.77268	5.64755	10.4469	5.57759e-06	0.000496193	4.52367	Cybb	X	cytochrome b-245 beta chain	ENSG00000165168	CYBB	1	1536	6.95876	4.33634
ENSRNOG00000007088	-1.76242	6.25865	-10.4446	5.58692e-06	0.000496193	4.48292	Xpot	7	exportin for tRNA	ENSG00000184575	XPOT	1	11260	5.43528	7.08202
ENSRNOG00000000991	1.76344	7.47031	10.4241	5.67093e-06	0.000498672	4.49262	Arpc1b	12	actin related protein 2/3 complex, subunit 1B	ENSG00000130429	ARPC1B	1	10095	8.30478	6.63584
ENSRNOG00000050794	2.01761	3.25628	10.3598	5.94376e-06	0.000505377	4.61983	Pdlim4	10	PDZ and LIM domain 4	ENSG00000131435	PDLIM4	1	8572	4.24946	2.26311
ENSRNOG00000036703	2.74603	3.8781	10.3529	5.97387e-06	0.000505377	4.58574	Itgax	1	integrin subunit alpha X	ENSG00000140678	ITGAX	1	3687	5.24583	2.51036
ENSRNOG00000001796	-2.68891	4.29793	-10.3121	6.15551e-06	0.000505377	4.57767	Dgkg	11	diacylglycerol kinase, gamma	ENSG00000058866	DGKG	1	1608	2.95108	5.64478
ENSRNOG00000005620	2.18684	2.66459	10.2435	6.47462e-06	0.000505377	4.53619	Lcp2	10	lymphocyte cytosolic protein 2	ENSG00000043462	LCP2	1	3937	3.78512	1.54405
ENSRNOG00000006025	3.05696	3.74888	10.2499	6.44413e-06	0.000505377	4.5275	Lamb3	13	laminin subunit beta 3	ENSG00000196878	LAMB3	1	3914	5.356	2.14176
ENSRNOG00000007574	1.81106	3.40077	10.1952	6.71064e-06	0.000505377	4.49456	Padi2	5	peptidyl arginine deiminase 2	ENSG00000117115	PADI2	1	11240	4.26408	2.53745
ENSRNOG00000010208	3.48205	2.76305	10.1903	6.73523e-06	0.000505377	4.48828	Timp1	X	TIMP metallopeptidase inhibitor 1	ENSG00000102265	TIMP1	1	7076	4.44214	1.08396
ENSRNOG00000004743	1.51252	4.05371	10.232	6.52994e-06	0.000505377	4.45862	Cdcp1	8	CUB domain containing protein 1	ENSG00000163814	CDCP1	1	64866	4.84453	3.26288
ENSRNOG00000019494	2.25963	4.63831	10.2744	6.32865e-06	0.000505377	4.44438	Psmb10	19	proteasome subunit beta 10	ENSG00000205220	PSMB10	1	5699	5.70009	3.57653
ENSRNOG00000011054	2.46266	5.2151	10.2955	6.23122e-06	0.000505377	4.41749	Laptm5	5	lysosomal protein transmembrane 5	ENSG00000162511	LAPTM5	1	7805	6.35328	4.07691
ENSRNOG00000017820	-2.09928	5.05906	-10.2195	6.59084e-06	0.000505377	4.41547	Nqo2	17	NAD(P)H quinone dehydrogenase 2	ENSG00000124588	NQO2	1	4835	4.03806	6.08006
ENSRNOG00000007679	1.97133	5.10419	10.3025	6.19918e-06	0.000505377	4.40987	Cyth4	7	cytohesin 4	ENSG00000100055	CYTH4	1	27128	6.07798	4.1304
ENSRNOG00000004503	-1.44433	5.22645	-10.2726	6.33721e-06	0.000505377	4.40787	L3hypdh	6	trans-L-3-hydroxyproline dehydratase	ENSG00000126790	L3HYPDH	1	112849	4.50981	5.94308
ENSRNOG00000018207	1.24832	4.96577	10.2876	6.26736e-06	0.000505377	4.39629	Dynlt1	1	dynein light chain Tctex-type 1	ENSG00000146425	DYNLT1	1	6993	5.58249	4.34905
ENSRNOG00000019698	1.63572	4.32766	10.1756	6.8093e-06	0.000505377	4.39012	Ssbp4	16	single stranded DNA binding protein 4	ENSG00000130511	SSBP4	1	170463	5.09279	3.56253
ENSRNOG00000009856	-1.19088	6.16614	-10.342	6.02151e-06	0.000505377	4.38729	Sypl1	6	synaptophysin-like 1	ENSG00000008282	SYPL1	1	6856	5.57646	6.75582
ENSRNOG00000014653	3.61376	1.58817	10.3026	6.19873e-06	0.000505377	4.38413	Arl11	15	ADP-ribosylation factor like GTPase 11	ENSG00000152213	ARL11	1	115761	3.35935	-0.183009
ENSRNOG00000014453	1.82923	7.73235	10.2478	6.4541e-06	0.000505377	4.36842	Anxa5	2	annexin A5	ENSG00000164111	ANXA5	1	308	8.60469	6.86
ENSRNOG00000011071	-1.27694	5.87227	-10.2927	6.24377e-06	0.000505377	4.36467	Nt5e	8	5' nucleotidase, ecto	ENSG00000135318	NT5E	1	4907	5.24092	6.50362
ENSRNOG00000006940	2.58062	1.71181	10.1726	6.82461e-06	0.000505377	4.36267	Ncf4	7	neutrophil cytosolic factor 4	ENSG00000100365	NCF4	1	4689	3.02204	0.401586
ENSRNOG00000054890	1.78334	8.04294	10.2056	6.65896e-06	0.000505377	4.35062	Flna	X	filamin A	ENSG00000196924	FLNA	1	2316	8.89634	7.18953
ENSRNOG00000010890	1.56864	5.06233	10.1882	6.74568e-06	0.000505377	4.31679	Bmp1	15	bone morphogenetic protein 1	ENSG00000168487	BMP1	1	649	5.82809	4.29657
ENSRNOG00000000485	1.77068	4.97751	10.1655	6.86064e-06	0.000505377	4.30839	Bak1	20	BCL2-antagonist/killer 1	ENSG00000030110	BAK1	1	578	5.82362	4.1314
ENSRNOG00000014797	1.24848	5.59778	10.2241	6.56851e-06	0.000505377	4.29914	Tmbim1	9	transmembrane BAX inhibitor motif containing 1	ENSG00000135926	TMBIM1	1	64114	6.2185	4.97706
ENSRNOG00000011361	-1.73219	7.10055	-10.2168	6.60429e-06	0.000505377	4.29201	Slc37a4	8	solute carrier family 37 member 4	ENSG00000137700	SLC37A4	1	2542	6.2446	7.95649
ENSRNOG00000000187	-1.95188	6.84562	-10.1634	6.87163e-06	0.000505377	4.25238	Csf2rb	7	colony stimulating factor 2 receptor beta common subunit	ENSG00000100368	CSF2RB	1	1439	5.88626	7.80499
ENSRNOG00000019306	4.0203	0.929869	10.2894	6.259e-06	0.000505377	4.15111	Syt12	1	synaptotagmin 12	ENSG00000173227	SYT12	1	91683	2.97617	-1.11643
ENSRNOG00000015967	1.55024	5.94134	10.0882	7.2683e-06	0.00053133	4.18871	Sh3bgrl3	5	SH3 domain binding glutamate-rich protein like 3	ENSG00000142669	SH3BGRL3	1	83442	6.64995	5.23273
ENSRNOG00000028566	1.91905	3.90916	10.0788	7.32001e-06	0.000531374	4.36171	Pld4	6	phospholipase D family, member 4	ENSG00000166428	PLD4	1	122618	4.84019	2.97813
ENSRNOG00000016183	-1.61638	5.00137	-10.0643	7.40026e-06	0.000531374	4.27806	Ipp	5	intracisternal A particle-promoted polypeptide	ENSG00000197429	IPP	1	3652	4.21058	5.79216
ENSRNOG00000045738	-3.08535	6.21831	-10.0683	7.37783e-06	0.000531374	4.24876	Ak4	5	adenylate kinase 4	ENSG00000162433	AK4	1	205	4.73869	7.69793
ENSRNOG00000004307	1.81167	3.46135	10.0428	7.52074e-06	0.000533708	4.37111	Tor3a	13	torsin family 3, member A	ENSG00000186283	TOR3A	1	64222	4.32877	2.59393
ENSRNOG00000004936	-1.32817	7.77646	-10.0504	7.4776e-06	0.000533708	4.18382	Sdc2	7	syndecan 2	ENSG00000169439	SDC2	1	6383	7.08399	8.46893
ENSRNOG00000020845	2.70047	3.35238	9.92356	8.23035e-06	0.000535	4.29492	Tyrobp	1	Tyro protein tyrosine kinase binding protein	ENSG00000011600	TYROBP	1	7305	4.64645	2.0583
ENSRNOG00000020505	2.29391	2.83371	9.90468	8.34942e-06	0.000535	4.29118	Map4k1	1	mitogen activated protein kinase kinase kinase kinase 1	ENSG00000104814	MAP4K1	1	11184	3.9281	1.73931
ENSRNOG00000020470	2.00815	3.99273	9.96195	7.99397e-06	0.000535	4.26484	Slc25a24	2	solute carrier family 25 member 24	ENSG00000085491	SLC25A24	1	29957	5.01451	2.97095
ENSRNOG00000014336	2.02999	2.86403	9.85768	8.65434e-06	0.000535	4.25612	Mcm5	19	minichromosome maintenance complex component 5	ENSG00000100297	MCM5	1	4174	3.86986	1.85821
ENSRNOG00000032922	2.27952	3.78035	9.88754	8.45918e-06	0.000535	4.23725	Dclk1	2	doublecortin-like kinase 1	ENSG00000133083	DCLK1	1	9201	4.87976	2.68094
ENSRNOG00000021170	1.85674	4.54017	10.0019	7.75596e-06	0.000535	4.2271	Plekho1	2	pleckstrin homology domain containing O1	ENSG00000023902	PLEKHO1	1	51177	5.42469	3.65566
ENSRNOG00000016753	1.73208	4.57679	9.97497	7.91556e-06	0.000535	4.19404	Slc14a1	18	solute carrier family 14 member 1	ENSG00000141469	SLC14A1	1	6563	5.47431	3.67928
ENSRNOG00000011599	-1.7426	4.62916	-9.88701	8.46265e-06	0.000535	4.19086	Gldc	1	glycine decarboxylase	ENSG00000178445	GLDC	1	2731	3.80058	5.45774
ENSRNOG00000000655	2.19742	4.07534	9.87696	8.52775e-06	0.000535	4.18938	Ptprc	13	protein tyrosine phosphatase, receptor type, C	ENSG00000081237	PTPRC	1	5788	5.21408	2.93661
ENSRNOG00000023588	-3.18916	6.38777	-10.004	7.74375e-06	0.000535	4.18772	Dmgdh	2	dimethylglycine dehydrogenase	ENSG00000132837	DMGDH	1	29958	4.88719	7.88836
ENSRNOG00000025448	1.83077	4.71673	9.97089	7.94004e-06	0.000535	4.18239	Limd2	10	LIM domain containing 2	ENSG00000136490	LIMD2	1	80774	5.60928	3.82419
ENSRNOG00000013419	-3.12306	5.40007	-9.87288	8.55436e-06	0.000535	4.16175	Hykk	8	hydroxylysine kinase	ENSG00000188266	HYKK	1	123688	3.94293	6.85722
ENSRNOG00000017775	-1.51327	5.16206	-9.94721	8.08386e-06	0.000535	4.15824	Slc5a1	14	solute carrier family 5 member 1	ENSG00000100170	SLC5A1	1	6523	4.36214	5.96199
ENSRNOG00000003510	-1.65669	4.99815	-9.90001	8.37916e-06	0.000535	4.14785	Fmo2	13	flavin containing monooxygenase 2	ENSG00000094963	FMO2	1	2327	4.1783	5.81799
ENSRNOG00000017434	-2.02451	5.07685	-9.88626	8.46746e-06	0.000535	4.14537	Mgat3	7	mannosyl (beta-1,4-)-glycoprotein beta-1,4-N-acetylglucosaminyltransferase	ENSG00000128268	MGAT3	1	4248	4.09105	6.06266
ENSRNOG00000048878	-1.38131	5.6307	-9.96752	7.96034e-06	0.000535	4.12942	Smim24	7	small integral membrane protein 24	ENSG00000095932	SMIM24	1	284422	4.9321	6.32931
ENSRNOG00000047734	-1.56617	4.96066	-9.86277	8.62069e-06	0.000535	4.12095	Chst2	8	carbohydrate sulfotransferase 2	ENSG00000175040	CHST2	1	9435	4.19141	5.72991
ENSRNOG00000050315	-2.10171	6.1142	-9.945	8.09741e-06	0.000535	4.10691	Dcxr	10	dicarbonyl and L-xylulose reductase	ENSG00000169738	DCXR	1	51181	5.07113	7.15728
ENSRNOG00000001052	-2.29072	6.34233	-9.93612	8.15217e-06	0.000535	4.09725	Slc25a30	15	solute carrier family 25, member 30	ENSG00000174032	SLC25A30	1	253512	5.27857	7.4061
ENSRNOG00000002643	-1.21902	7.03351	-9.96855	7.9541e-06	0.000535	4.08611	Ugdh	14	UDP-glucose 6-dehydrogenase	ENSG00000109814	UGDH	1	7358	6.42403	7.64299
ENSRNOG00000013987	1.474	6.19109	9.96428	7.97989e-06	0.000535	4.08353	Sbno2	7	strawberry notch homolog 2	ENSG00000064932	SBNO2	1	22904	6.94607	5.43611
ENSRNOG00000001091	0.987962	5.89103	9.96638	7.96723e-06	0.000535	4.07705	Hip1r	12	huntingtin interacting protein 1 related	ENSG00000130787	HIP1R	1	9026	6.37518	5.40687
ENSRNOG00000011511	-1.01404	5.60282	-9.87438	8.54461e-06	0.000535	4.03948	Stk24	15	serine/threonine kinase 24	ENSG00000102572	STK24	1	8428	5.09593	6.10971
ENSRNOG00000013971	-1.91634	7.31061	-9.8649	8.60667e-06	0.000535	4.0151	Psat1	1	phosphoserine aminotransferase 1	ENSG00000135069	PSAT1	1	29968	6.33927	8.28195
ENSRNOG00000029528	-2.08064	6.98068	-9.83982	8.77338e-06	0.000535	3.99323	Cbs	20	cystathionine beta synthase	ENSG00000274276	CBSL	1	102724560	5.93275	8.02862
ENSRNOG00000029528	-2.08064	6.98068	-9.83982	8.77338e-06	0.000535	3.99323	Cbs	20	cystathionine beta synthase	ENSG00000160200	CBS	1	875	5.93275	8.02862
ENSRNOG00000004303	-1.1878	7.23781	-9.84231	8.75666e-06	0.000535	3.99055	Timp3	7	TIMP metallopeptidase inhibitor 3	ENSG00000100234	TIMP3	1	7078	6.65938	7.81623
ENSRNOG00000008320	-1.5942	6.80803	-9.8426	8.75472e-06	0.000535	3.98456	Lypla1	5	lysophospholipase I	ENSG00000120992	LYPLA1	1	10434	6.0425	7.57356
ENSRNOG00000001830	5.73416	-1.72084	9.95175	8.05605e-06	0.000535	3.41336	Arntl2	4	aryl hydrocarbon receptor nuclear translocator-like 2	ENSG00000029153	ARNTL2	1	56938	1.03035	-4.47203
ENSRNOG00000019582	2.20224	2.31033	9.79238	9.09873e-06	0.000543907	4.18966	Mthfd1l	1	methylenetetrahydrofolate dehydrogenase (NADP+ dependent) 1-like	ENSG00000120254	MTHFD1L	1	25902	3.37578	1.24488
ENSRNOG00000043416	2.18246	3.8229	9.79785	9.0605e-06	0.000543907	4.1518	Bcl3	1	B-cell CLL/lymphoma 3	ENSG00000069399	BCL3	1	602	4.94587	2.69994
ENSRNOG00000013220	1.90935	4.56607	9.79306	9.09394e-06	0.000543907	4.06085	Arhgap45	7	Rho GTPase activating protein 45	ENSG00000180448	ARHGAP45	1	23526	5.52132	3.61082
ENSRNOG00000016062	-1.48163	6.08753	-9.81153	8.96581e-06	0.000543907	3.97437	Snta1	3	syntrophin, alpha 1	ENSG00000101400	SNTA1	1	6640	5.33398	6.84109
ENSRNOG00000016166	1.90067	4.36619	9.76895	9.26429e-06	0.000551089	4.06378	Pdlim1	1	PDZ and LIM domain 1	ENSG00000107438	PDLIM1	1	9124	5.25663	3.47575
ENSRNOG00000008409	2.14713	3.71614	9.75652	9.35355e-06	0.000553684	4.12912	Myo1f	7	myosin IF	ENSG00000142347	MYO1F	1	4542	4.75732	2.67495
ENSRNOG00000010325	1.20639	5.84664	9.7458	9.43121e-06	0.000555572	3.90237	Ptger3	2	prostaglandin E receptor 3	ENSG00000050628	PTGER3	1	5733	6.41713	5.27615
ENSRNOG00000027990	2.26818	3.68544	9.68635	9.8755e-06	0.000572975	4.08046	Crip1	6	cysteine rich protein 1	ENSG00000257341	AL928654.3	1	NA	4.75757	2.6133
ENSRNOG00000027990	2.26818	3.68544	9.68635	9.8755e-06	0.000572975	4.08046	Crip1	6	cysteine rich protein 1	ENSG00000213145	CRIP1	1	1396	4.75757	2.6133
ENSRNOG00000009957	-1.8715	5.82084	-9.67902	9.93186e-06	0.000572975	3.89951	Slc25a13	4	solute carrier family 25 member 13	ENSG00000004864	SLC25A13	1	10165	4.90404	6.73765
ENSRNOG00000021259	1.50719	5.40007	9.67899	9.93205e-06	0.000572975	3.87358	Prnp	3	prion protein	ENSG00000171867	PRNP	1	5621	6.11442	4.68572
ENSRNOG00000034116	-2.315	6.77809	-9.67502	9.96273e-06	0.000572975	3.86668	Gk	X	glycerol kinase	ENSG00000229894	GK3P	0	NA	5.63942	7.91677
ENSRNOG00000034116	-2.315	6.77809	-9.67502	9.96273e-06	0.000572975	3.86668	Gk	X	glycerol kinase	ENSG00000198814	GK	1	2710	5.63942	7.91677
ENSRNOG00000048321	6.16082	-0.65969	9.68625	9.87625e-06	0.000572975	3.43013	Tnfsf8	5	tumor necrosis factor superfamily member 8	ENSG00000106952	TNFSF8	1	944	2.09028	-3.40966
ENSRNOG00000007350	2.21317	3.91883	9.663	1.00563e-05	0.000575626	4.03848	Rac2	7	ras-related C3 botulinum toxin substrate 2 (rho family, small GTP binding protein Rac2)	ENSG00000128340	RAC2	1	5880	5.0074	2.83027
ENSRNOG00000012062	1.43092	7.56281	9.63769	1.02564e-05	0.000584328	3.85918	Npc2	6	NPC intracellular cholesterol transporter 2	ENSG00000119655	NPC2	1	10577	8.23399	6.89163
ENSRNOG00000009311	2.23482	2.82679	9.62531	1.0356e-05	0.000584512	4.07982	Fstl3	7	follistatin like 3	ENSG00000070404	FSTL3	1	10272	3.8866	1.76699
ENSRNOG00000036760	4.13643	1.38352	9.62631	1.03479e-05	0.000584512	3.83722	Tmc5	1	transmembrane channel-like 5	ENSG00000103534	TMC5	1	79838	3.41442	-0.64738
ENSRNOG00000038365	1.1878	5.20152	9.604	1.05298e-05	0.000591571	3.81989	Plekha2	16	pleckstrin homology domain containing A2	ENSG00000169499	PLEKHA2	1	59339	5.79008	4.61296
ENSRNOG00000019907	1.47404	3.71502	9.58954	1.06497e-05	0.000595548	3.9888	Nfkbie	9	NFKB inhibitor epsilon	ENSG00000146232	NFKBIE	1	4794	4.42727	3.00278
ENSRNOG00000003947	-1.35345	4.56028	-9.5778	1.0748e-05	0.000595558	3.92303	Ntn1	10	netrin 1	ENSG00000065320	NTN1	1	9423	3.8613	5.25927
ENSRNOG00000014125	2.71339	1.39716	9.58171	1.07152e-05	0.000595558	3.89802	Evi2b	10	ecotropic viral integration site 2B	ENSG00000185862	EVI2B	1	2124	2.74054	0.0537696
ENSRNOG00000032261	-2.5959	3.58571	-9.54819	1.10007e-05	0.000597246	4.02082	Cyp2d4	7	cytochrome P450, family 2, subfamily d, polypeptide 4	ENSG00000205702	CYP2D7	1	1564	2.35801	4.81341
ENSRNOG00000032261	-2.5959	3.58571	-9.54819	1.10007e-05	0.000597246	4.02082	Cyp2d4	7	cytochrome P450, family 2, subfamily d, polypeptide 4	ENSG00000100197	CYP2D6	1	1565	2.35801	4.81341
ENSRNOG00000032261	-2.5959	3.58571	-9.54819	1.10007e-05	0.000597246	4.02082	Cyp2d4	7	cytochrome P450, family 2, subfamily d, polypeptide 4	ENSG00000100197	CYP2D6	1	107987478	2.35801	4.81341
ENSRNOG00000032261	-2.5959	3.58571	-9.54819	1.10007e-05	0.000597246	4.02082	Cyp2d4	7	cytochrome P450, family 2, subfamily d, polypeptide 4	ENSG00000100197	CYP2D6	1	107987479	2.35801	4.81341
ENSRNOG00000006646	1.51907	4.5859	9.56748	1.08354e-05	0.000597246	3.86189	Vopp1	4	vesicular, overexpressed in cancer, prosurvival protein 1	ENSG00000154978	VOPP1	1	81552	5.31623	3.85558
ENSRNOG00000030616	-1.35958	5.27891	-9.54592	1.10203e-05	0.000597246	3.81257	Slc25a45	1	solute carrier family 25, member 45	ENSG00000162241	SLC25A45	1	283130	4.60544	5.95237
ENSRNOG00000046996	1.56199	6.96398	9.54543	1.10246e-05	0.000597246	3.75439	Pea15	13	phosphoprotein enriched in astrocytes 15	ENSG00000162734	PEA15	1	8682	7.68613	6.24183
ENSRNOG00000005931	-1.21041	6.90578	-9.55021	1.09832e-05	0.000597246	3.73595	Cpq	7	carboxypeptidase Q	ENSG00000104324	CPQ	1	10404	6.26178	7.54977
ENSRNOG00000005378	2.41568	2.37693	9.5216	1.12333e-05	0.000597577	3.98995	Gna15	7	guanine nucleotide binding protein, alpha 15	ENSG00000060558	GNA15	1	2769	3.51562	1.23824
ENSRNOG00000036829	2.17335	3.56275	9.53437	1.11209e-05	0.000597577	3.96878	Nckap1l	7	NCK associated protein 1 like	ENSG00000123338	NCKAP1L	1	3071	4.63376	2.49174
ENSRNOG00000022711	-3.21046	5.15354	-9.51116	1.13261e-05	0.000597577	3.90096	Slco4c1	9	solute carrier organic anion transporter family, member 4C1	ENSG00000173930	SLCO4C1	1	353189	3.66875	6.63833
ENSRNOG00000059406	1.33099	5.1649	9.52209	1.1229e-05	0.000597577	3.75978	Ier5	13	immediate early response 5	ENSG00000162783	IER5	1	51278	5.78853	4.54126
ENSRNOG00000020245	4.65774	0.220477	9.51453	1.12961e-05	0.000597577	3.36587	Syt8	1	synaptotagmin 8	ENSG00000149043	SYT8	1	90019	2.38398	-1.94302
ENSRNOG00000007067	5.4477	-0.610981	9.53113	1.11493e-05	0.000597577	3.31804	Padi1	5	peptidyl arginine deiminase 1	ENSG00000142623	PADI1	1	29943	1.95013	-3.17209
ENSRNOG00000002045	1.73791	5.23093	9.49559	1.14661e-05	0.000602343	3.74018	Anxa3	14	annexin A3	ENSG00000138772	ANXA3	1	306	6.03398	4.42788
ENSRNOG00000009912	1.95463	2.93867	9.466	1.17375e-05	0.000606106	3.95353	Fgr	5	FGR proto-oncogene, Src family tyrosine kinase	ENSG00000000938	FGR	1	2268	3.85478	2.02257
ENSRNOG00000031665	-2.75134	4.83132	-9.46666	1.17314e-05	0.000606106	3.87807	Ace2	X	angiotensin I converting enzyme 2	ENSG00000130234	ACE2	1	59272	3.50759	6.15505
ENSRNOG00000060123	-1.80569	4.67287	-9.46892	1.17104e-05	0.000606106	3.84043	Kifc2	7	kinesin family member C2	ENSG00000167702	KIFC2	1	90990	3.77083	5.57491
ENSRNOG00000005096	1.61191	4.83073	9.48	1.16082e-05	0.000606106	3.7603	Bzw2	6	basic leucine zipper and W2 domains 2	ENSG00000136261	BZW2	1	28969	5.60696	4.05451
ENSRNOG00000013663	-1.22388	5.34827	-9.45999	1.17935e-05	0.000606414	3.72824	Tmem86a	1	transmembrane protein 86A	ENSG00000151117	TMEM86A	1	144110	4.73388	5.96266
ENSRNOG00000005126	2.36841	2.87778	9.42269	1.21477e-05	0.000612336	3.92096	Pqlc3	6	PQ loop repeat containing 3	ENSG00000162976	SLC66A3	1	130814	3.9971	1.75845
ENSRNOG00000020699	2.59982	3.00407	9.40798	1.22907e-05	0.000612336	3.90849	Cd37	1	CD37 molecule	ENSG00000104894	CD37	1	951	4.23901	1.76912
ENSRNOG00000014367	4.15152	2.94273	9.38835	1.24843e-05	0.000612336	3.89276	Ephb6	4	Eph receptor B6	ENSG00000106123	EPHB6	1	2051	4.91588	0.969578
ENSRNOG00000012543	2.49553	2.79373	9.37529	1.26151e-05	0.000612336	3.88574	Mcm3	9	minichromosome maintenance complex component 3	ENSG00000112118	MCM3	1	4172	4.00244	1.58501
ENSRNOG00000022225	-2.34994	4.26574	-9.40398	1.23298e-05	0.000612336	3.86432	Lrrc19	5	leucine rich repeat containing 19	ENSG00000184434	LRRC19	1	64922	3.12347	5.40802
ENSRNOG00000046834	3.31396	4.42861	9.37839	1.25839e-05	0.000612336	3.78851	C3	9	complement C3	ENSG00000125730	C3	1	718	6.00307	2.85415
ENSRNOG00000021359	-1.36817	4.47868	-9.38317	1.2536e-05	0.000612336	3.77475	Mtfr1	2	mitochondrial fission regulator 1	ENSG00000066855	MTFR1	1	9650	3.80226	5.1551
ENSRNOG00000020310	1.16029	4.51083	9.3783	1.25848e-05	0.000612336	3.70675	Grik5	1	glutamate ionotropic receptor kainate type subunit 5	ENSG00000105737	GRIK5	1	2901	5.09009	3.93157
ENSRNOG00000020679	1.74086	5.1578	9.41449	1.22272e-05	0.000612336	3.67571	Icam1	8	intercellular adhesion molecule 1	ENSG00000090339	ICAM1	1	3383	5.98489	4.33072
ENSRNOG00000011778	-2.16314	5.99638	-9.3791	1.25768e-05	0.000612336	3.64494	Blvra	3	biliverdin reductase A	ENSG00000106605	BLVRA	1	644	4.95937	7.03339
ENSRNOG00000016367	1.21012	6.27753	9.41676	1.22051e-05	0.000612336	3.61932	Vasp	1	vasodilator-stimulated phosphoprotein	ENSG00000125753	VASP	1	7408	6.85835	5.69671
ENSRNOG00000002121	-1.14091	6.66766	-9.37939	1.25739e-05	0.000612336	3.58557	Lrrc8d	14	leucine rich repeat containing 8 family, member D	ENSG00000171492	LRRC8D	1	55144	6.10617	7.22916
ENSRNOG00000015529	3.73061	0.399224	9.41702	1.22026e-05	0.000612336	3.4219	Cdca3	4	cell division cycle associated 3	ENSG00000111665	CDCA3	1	83461	2.19528	-1.39683
ENSRNOG00000014327	5.06631	-1.36405	9.38103	1.25575e-05	0.000612336	3.12946	Csrp3	1	cysteine and glycine rich protein 3	ENSG00000129170	CSRP3	1	8048	1.21744	-3.94554
ENSRNOG00000048915	1.83655	3.31314	9.36083	1.27616e-05	0.000616982	3.84619	Twf2	8	twinfilin actin-binding protein 2	ENSG00000247596	TWF2	1	11344	4.16138	2.4649
ENSRNOG00000014259	2.9764	1.79066	9.32045	1.3181e-05	0.000618336	3.77204	Mycl	5	v-myc avian myelocytomatosis viral oncogene lung carcinoma derived homolog	ENSG00000116990	MYCL	1	4610	3.29802	0.283307
ENSRNOG00000018131	-4.18662	5.6976	-9.30315	1.33654e-05	0.000618336	3.73531	Slc16a4	2	solute carrier family 16, member 4	ENSG00000168679	SLC16A4	1	9122	3.7383	7.6569
ENSRNOG00000011794	-2.15088	4.56513	-9.29263	1.34788e-05	0.000618336	3.73162	Tcea3	5	transcription elongation factor A3	ENSG00000204219	TCEA3	1	6920	3.54419	5.58607
ENSRNOG00000015773	2.99801	1.13659	9.33161	1.30636e-05	0.000618336	3.67319	Il21r	1	interleukin 21 receptor	ENSG00000103522	IL21R	1	50615	2.64407	-0.370895
ENSRNOG00000000589	-2.3205	5.10814	-9.2904	1.3503e-05	0.000618336	3.67146	RGD1310495	20	similar to KIAA1919 protein	ENSG00000173214	MFSD4B	1	91749	3.9945	6.22178
ENSRNOG00000049244	-1.43875	5.42282	-9.34897	1.28833e-05	0.000618336	3.6343	Sepsecs	14	Sep (O-phosphoserine) tRNA:Sec (selenocysteine) tRNA synthase	ENSG00000109618	SEPSECS	1	51091	4.75291	6.09273
ENSRNOG00000000456	2.78697	5.20594	9.30654	1.3329e-05	0.000618336	3.62657	Psmb8	20	proteasome subunit beta 8	ENSG00000204264	PSMB8	1	5696	6.50221	3.90967
ENSRNOG00000026962	-2.80226	6.11473	-9.2919	1.34867e-05	0.000618336	3.59968	Osbpl8	7	oxysterol binding protein-like 8	ENSG00000091039	OSBPL8	1	114882	4.84109	7.38837
ENSRNOG00000012817	3.55474	1.11995	9.32002	1.31855e-05	0.000618336	3.5979	Lrrc17	4	leucine rich repeat containing 17	ENSG00000128606	LRRC17	1	10234	2.74936	-0.509452
ENSRNOG00000002347	-1.27942	6.63294	-9.34256	1.29495e-05	0.000618336	3.55666	Rgl1	13	ral guanine nucleotide dissociation stimulator,-like 1	ENSG00000143344	RGL1	1	23179	6.00092	7.26496
ENSRNOG00000023605	-1.09678	6.51647	-9.34139	1.29617e-05	0.000618336	3.55201	Ncbp1	5	nuclear cap binding protein subunit 1	ENSG00000136937	NCBP1	1	4686	5.97282	7.06012
ENSRNOG00000012701	-1.40833	7.35069	-9.29487	1.34546e-05	0.000618336	3.53317	Map7	1	microtubule-associated protein 7	ENSG00000135525	MAP7	1	9053	6.68068	8.0207
ENSRNOG00000006916	-1.73457	6.76632	-9.29497	1.34535e-05	0.000618336	3.52636	Sardh	3	sarcosine dehydrogenase	ENSG00000123453	SARDH	1	1757	5.91352	7.61912
ENSRNOG00000017456	4.28329	-0.103816	9.3319	1.30605e-05	0.000618336	3.20349	Vstm2b	1	V-set and transmembrane domain containing 2B	ENSG00000187135	VSTM2B	1	342865	1.9273	-2.13493
ENSRNOG00000003538	3.31567	2.58566	9.2849	1.35629e-05	0.000618578	3.8057	Adamts4	13	ADAM metallopeptidase with thrombospondin type 1 motif, 4	ENSG00000158859	ADAMTS4	1	9507	4.14892	1.02239
ENSRNOG00000026644	2.98003	2.19792	9.27969	1.362e-05	0.000618578	3.79012	Glipr1	7	GLI pathogenesis-related 1	ENSG00000139278	GLIPR1	1	11010	3.60024	0.795603
ENSRNOG00000009719	-1.03407	5.73834	-9.27593	1.36612e-05	0.000618578	3.52633	C2cd2l	8	C2CD2-like	ENSG00000172375	C2CD2L	1	9854	5.22147	6.25521
ENSRNOG00000009409	2.73879	2.04178	9.25227	1.39243e-05	0.000622406	3.75315	Fbxo2	5	F-box protein 2	ENSG00000116661	FBXO2	1	26232	3.31512	0.768453
ENSRNOG00000004749	-1.65201	5.33051	-9.25034	1.39461e-05	0.000622406	3.57051	Slc30a1	13	solute carrier family 30 member 1	ENSG00000170385	SLC30A1	1	7779	4.57534	6.08569
ENSRNOG00000008301	1.41348	7.84366	9.2543	1.39015e-05	0.000622406	3.54892	Tagln2	13	transgelin 2	ENSG00000158710	TAGLN2	1	8407	8.50523	7.1821
ENSRNOG00000051171	-3.42059	7.41802	-9.24991	1.39509e-05	0.000622406	3.53133	G6pc	10	glucose-6-phosphatase, catalytic subunit	ENSG00000131482	G6PC	1	2538	5.65262	9.18342
ENSRNOG00000031312	1.60736	5.80046	9.23929	1.4071e-05	0.000625465	3.48385	Tnfrsf1a	4	TNF receptor superfamily member 1A	ENSG00000067182	TNFRSF1A	1	7132	6.5758	5.02511
ENSRNOG00000004192	2.33396	3.425	9.23387	1.41329e-05	0.000625921	3.73301	Arhgap30	13	Rho GTPase activating protein 30	ENSG00000186517	ARHGAP30	1	257106	4.64626	2.20374
ENSRNOG00000008816	6.66857	4.67318	9.19537	1.45805e-05	0.00062984	3.73829	Gpnmb	4	glycoprotein nmb	ENSG00000136235	GPNMB	1	10457	7.91947	1.4269
ENSRNOG00000050251	2.41731	1.94379	9.19526	1.45818e-05	0.00062984	3.71982	MGC105649	3	hypothetical LOC302884	ENSG00000166920	C15orf48	1	84419	3.22926	0.658314
ENSRNOG00000017105	-2.32488	5.23214	-9.21022	1.4406e-05	0.00062984	3.59162	Dpyd	2	dihydropyrimidine dehydrogenase	ENSG00000188641	DPYD	1	1806	4.10606	6.35822
ENSRNOG00000015003	-2.11291	5.17579	-9.19502	1.45847e-05	0.00062984	3.56946	Pex11a	1	peroxisomal biogenesis factor 11 alpha	ENSG00000166821	PEX11A	1	8800	4.17347	6.17811
ENSRNOG00000049937	-1.19105	4.96522	-9.20635	1.44513e-05	0.00062984	3.54926	Pdxk	20	pyridoxal (pyridoxine, vitamin B6) kinase	ENSG00000160209	PDXK	1	8566	4.38707	5.54337
ENSRNOG00000049937	-1.19105	4.96522	-9.20635	1.44513e-05	0.00062984	3.54926	Pdxk	20	pyridoxal (pyridoxine, vitamin B6) kinase	ENSG00000160209	PDXK	1	105372824	4.38707	5.54337
ENSRNOG00000010233	1.10978	7.57572	9.21641	1.4334e-05	0.00062984	3.49748	Cald1	4	caldesmon 1	ENSG00000122786	CALD1	1	800	8.13383	7.01761
ENSRNOG00000004411	1.73189	6.22361	9.21664	1.43313e-05	0.00062984	3.46248	Tspan8	7	tetraspanin 8	ENSG00000127324	TSPAN8	1	7103	7.08557	5.36165
ENSRNOG00000051854	-1.84236	7.92908	-9.17747	1.4794e-05	0.000636613	3.4599	Enpep	2	glutamyl aminopeptidase	ENSG00000138792	ENPEP	1	2028	7.06331	8.79485
ENSRNOG00000008115	2.40941	2.05755	9.14875	1.51438e-05	0.000643801	3.68719	Arhgap11a	3	Rho GTPase activating protein 11A	ENSG00000284906	AC091057.6	0	NA	3.25014	0.864963
ENSRNOG00000008115	2.40941	2.05755	9.14875	1.51438e-05	0.000643801	3.68719	Arhgap11a	3	Rho GTPase activating protein 11A	ENSG00000285077	ARHGAP11B	0	NA	3.25014	0.864963
ENSRNOG00000008115	2.40941	2.05755	9.14875	1.51438e-05	0.000643801	3.68719	Arhgap11a	3	Rho GTPase activating protein 11A	ENSG00000198826	ARHGAP11A	1	9824	3.25014	0.864963
ENSRNOG00000003746	-1.66221	4.86694	-9.1456	1.51827e-05	0.000643801	3.53451	Gjb1	X	gap junction protein, beta 1	ENSG00000169562	GJB1	1	2705	4.01096	5.72292
ENSRNOG00000020562	-1.61599	5.40114	-9.13782	1.52793e-05	0.000643801	3.46214	Slc22a18	1	solute carrier family 22, member 18	ENSG00000110628	SLC22A18	1	5002	4.58059	6.22169
ENSRNOG00000061216	1.86778	7.23508	9.15438	1.50746e-05	0.000643801	3.43628	Tubb5	20	tubulin, beta 5 class I	ENSG00000196230	TUBB	1	203068	8.08648	6.38368
ENSRNOG00000006328	-1.98856	6.72202	-9.15092	1.5117e-05	0.000643801	3.40874	Wwp1	5	WW domain containing E3 ubiquitin protein ligase 1	ENSG00000123124	WWP1	1	11059	5.79011	7.65392
ENSRNOG00000011203	1.00449	6.23653	9.14111	1.52384e-05	0.000643801	3.37498	Farp1	15	FERM, ARH/RhoGEF and pleckstrin domain protein 1	ENSG00000152767	FARP1	1	10160	6.73773	5.73534
ENSRNOG00000009580	-1.90528	2.93408	-9.13096	1.53651e-05	0.000645119	3.69135	Lca5	8	LCA5, lebercilin	ENSG00000135338	LCA5	1	167691	2.00355	3.86461
ENSRNOG00000001656	-2.42704	4.65277	-9.12262	1.54701e-05	0.000645119	3.58568	Kcnj15	11	potassium voltage-gated channel subfamily J member 15	ENSG00000157551	KCNJ15	1	3772	3.46846	5.83707
ENSRNOG00000014251	1.15381	5.73295	9.1232	1.54628e-05	0.000645119	3.37139	Capn5	1	calpain 5	ENSG00000149260	CAPN5	1	726	6.32534	5.14057
ENSRNOG00000030983	-2.40039	5.4882	-9.11637	1.55494e-05	0.0006454	3.48305	B3galt5	11	Beta-1,3-galactosyltransferase 5	ENSG00000183778	B3GALT5	1	10317	4.38503	6.59137
ENSRNOG00000006079	1.23304	4.5699	9.10954	1.56364e-05	0.0006454	3.46837	Psd4	3	pleckstrin and Sec7 domain containing 4	ENSG00000125637	PSD4	1	23550	5.19779	3.942
ENSRNOG00000002032	1.16974	4.66265	9.11021	1.56278e-05	0.0006454	3.45677	Ifngr2	11	interferon gamma receptor 2	ENSG00000159128	IFNGR2	1	3460	5.23357	4.09174
ENSRNOG00000019943	1.64483	3.28307	9.09162	1.58674e-05	0.000648321	3.62549	Slc7a6	19	solute carrier family 7 member 6	ENSG00000103064	SLC7A6	1	9057	4.10782	2.45831
ENSRNOG00000005196	-1.49801	5.90847	-9.0942	1.58339e-05	0.000648321	3.37357	Slc12a6	3	solute carrier family 12, member 6	ENSG00000140199	SLC12A6	1	9990	5.23002	6.58691
ENSRNOG00000060350	-0.960833	6.68743	-9.0972	1.57951e-05	0.000648321	3.33729	Iqsec1	4	IQ motif and Sec7 domain 1	ENSG00000144711	IQSEC1	1	9922	6.20416	7.1707
ENSRNOG00000008936	2.16526	1.90014	9.07671	1.60625e-05	0.000650487	3.61794	Map3k6	5	mitogen-activated protein kinase kinase kinase 6	ENSG00000142733	MAP3K6	1	9064	2.96591	0.834378
ENSRNOG00000003709	-2.79779	6.37653	-9.07529	1.60813e-05	0.000650487	3.39185	Kmo	13	kynurenine 3-monooxygenase	ENSG00000117009	KMO	1	8564	5.00521	7.74785
ENSRNOG00000005480	1.18673	6.40414	9.07816	1.60434e-05	0.000650487	3.32519	Ybx3	4	Y box binding protein 3	ENSG00000060138	YBX3	1	8531	6.95236	5.85592
ENSRNOG00000001765	-2.45514	3.42938	-9.06531	1.62135e-05	0.000653656	3.63949	Slc51a	11	solute carrier family 51, alpha subunit	ENSG00000163959	SLC51A	1	200931	2.23122	4.62754
ENSRNOG00000016643	2.0447	3.09669	9.05093	1.64062e-05	0.000655936	3.60599	Lpcat2	19	lysophosphatidylcholine acyltransferase 2	ENSG00000087253	LPCAT2	1	54947	4.12867	2.06471
ENSRNOG00000010337	-2.88603	5.32826	-9.05416	1.63627e-05	0.000655936	3.4771	Slc13a2	10	solute carrier family 13 member 2	ENSG00000007216	SLC13A2	1	9058	3.91089	6.74562
ENSRNOG00000024577	-1.9851	5.63884	-9.04901	1.64322e-05	0.000655936	3.38256	Gamt	7	guanidinoacetate N-methyltransferase	ENSG00000130005	GAMT	1	2593	4.68229	6.59539
ENSRNOG00000019440	3.7921	1.84042	9.036	1.6609e-05	0.000658661	3.54932	Kcnn4	1	potassium calcium-activated channel subfamily N member 4	ENSG00000104783	KCNN4	1	3783	3.63799	0.0428529
ENSRNOG00000016097	-1.82672	7.40884	-9.03838	1.65766e-05	0.000658661	3.31291	Kyat1	3	kynurenine aminotransferase 1	ENSG00000171097	KYAT1	1	883	6.49406	8.32362
ENSRNOG00000016097	-1.82672	7.40884	-9.03838	1.65766e-05	0.000658661	3.31291	Kyat1	3	kynurenine aminotransferase 1	ENSG00000286112	AL441992.2	1	NA	6.49406	8.32362
ENSRNOG00000017874	3.27349	3.13648	9.00245	1.7075e-05	0.000660677	3.58202	Cd53	2	Cd53 molecule	ENSG00000143119	CD53	1	963	4.71103	1.56194
ENSRNOG00000006946	1.80326	3.22853	9.01827	1.68535e-05	0.000660677	3.56633	Arhgap9	7	Rho GTPase activating protein 9	ENSG00000123329	ARHGAP9	1	64333	4.10676	2.35031
ENSRNOG00000019630	-2.3506	5.79304	-9.01118	1.69523e-05	0.000660677	3.35496	Hacl1	16	2-hydroxyacyl-CoA lyase 1	ENSG00000131373	HACL1	1	26061	4.6083	6.97777
ENSRNOG00000011781	-1.48879	8.33892	-9.00318	1.70647e-05	0.000660677	3.3305	Oplah	7	5-oxoprolinase (ATP-hydrolysing)	ENSG00000178814	OPLAH	1	26873	7.58666	9.09119
ENSRNOG00000050214	-0.958157	5.90189	-9.00978	1.6972e-05	0.000660677	3.27813	Amt	8	aminomethyltransferase	ENSG00000145020	AMT	1	275	5.40147	6.40231
ENSRNOG00000003853	-1.16775	6.27693	-9.001	1.70954e-05	0.000660677	3.26063	Scoc	19	short coiled-coil protein	ENSG00000153130	SCOC	1	60592	5.68251	6.87135
ENSRNOG00000006779	-0.929459	6.39189	-9.00956	1.6975e-05	0.000660677	3.25837	Crot	4	carnitine O-octanoyltransferase	ENSG00000005469	CROT	1	54677	5.93148	6.85231
ENSRNOG00000006741	5.05841	-1.96649	9.01952	1.68361e-05	0.000660677	2.78978	Podnl1	19	podocan-like 1	ENSG00000132000	PODNL1	1	79883	0.539063	-4.47203
ENSRNOG00000059857	2.74933	2.79113	8.97787	1.74256e-05	0.000667236	3.56706	Rnd1	7	Rho family GTPase 1	ENSG00000172602	RND1	1	27289	4.15615	1.42611
ENSRNOG00000022565	2.33887	2.69736	8.94912	1.78459e-05	0.000667236	3.54387	Lrrc25	16	leucine rich repeat containing 25	ENSG00000175489	LRRC25	1	126364	3.80844	1.58627
ENSRNOG00000021390	2.1056	2.94498	8.95742	1.77234e-05	0.000667236	3.54145	Meis3	1	Meis homeobox 3	ENSG00000105419	MEIS3	1	56917	3.92091	1.96905
ENSRNOG00000033573	-1.84301	3.80944	-8.95705	1.77288e-05	0.000667236	3.51371	Sgk2	3	serum/glucocorticoid regulated kinase 2	ENSG00000101049	SGK2	1	10110	2.93042	4.68845
ENSRNOG00000018266	-3.08413	5.00685	-8.94753	1.78694e-05	0.000667236	3.43779	Slc23a3	9	solute carrier family 23, member 3	ENSG00000213901	SLC23A3	1	151295	3.5168	6.4969
ENSRNOG00000005348	-2.24055	4.9005	-8.9344	1.80653e-05	0.000667236	3.38709	Pamr1	3	peptidase domain containing associated with muscle regeneration 1	ENSG00000149090	PAMR1	1	25891	3.77328	6.02771
ENSRNOG00000031743	1.93124	4.58964	8.94854	1.78544e-05	0.000667236	3.33692	Gbp2	2	guanylate binding protein 2	ENSG00000162645	GBP2	1	2634	5.51386	3.66542
ENSRNOG00000030763	-1.81378	9.00475	-8.93625	1.80376e-05	0.000667236	3.31058	Dpp4	3	dipeptidylpeptidase 4	ENSG00000197635	DPP4	1	1803	8.11058	9.89892
ENSRNOG00000016071	1.64772	4.99806	8.95653	1.77365e-05	0.000667236	3.29068	P3h3	4	prolyl 3-hydroxylase 3	ENSG00000110811	P3H3	1	10536	5.79299	4.20313
ENSRNOG00000017077	-1.60148	5.75733	-8.97978	1.7398e-05	0.000667236	3.28909	Snx7	2	sorting nexin 7	ENSG00000162627	SNX7	1	51375	4.97086	6.5438
ENSRNOG00000004763	1.8573	5.55026	8.97171	1.75147e-05	0.000667236	3.26929	Sirpa	3	signal-regulatory protein alpha	ENSG00000101307	SIRPB1	0	10326	6.41029	4.69022
ENSRNOG00000004763	1.8573	5.55026	8.97171	1.75147e-05	0.000667236	3.26929	Sirpa	3	signal-regulatory protein alpha	ENSG00000260861	AL049634.2	0	NA	6.41029	4.69022
ENSRNOG00000004763	1.8573	5.55026	8.97171	1.75147e-05	0.000667236	3.26929	Sirpa	3	signal-regulatory protein alpha	ENSG00000089012	SIRPG	0	55423	6.41029	4.69022
ENSRNOG00000004763	1.8573	5.55026	8.97171	1.75147e-05	0.000667236	3.26929	Sirpa	3	signal-regulatory protein alpha	ENSG00000198053	SIRPA	1	140885	6.41029	4.69022
ENSRNOG00000005695	2.44212	7.2015	8.94242	1.79455e-05	0.000667236	3.2623	Mgp	4	matrix Gla protein	ENSG00000111341	MGP	1	4256	8.31303	6.08998
ENSRNOG00000013452	1.77551	5.5248	8.94995	1.78336e-05	0.000667236	3.24499	Rcn1	3	reticulocalbin 1	ENSG00000285283	AL035078.4	1	NA	6.38386	4.66575
ENSRNOG00000013452	1.77551	5.5248	8.94995	1.78336e-05	0.000667236	3.24499	Rcn1	3	reticulocalbin 1	ENSG00000049449	RCN1	1	5954	6.38386	4.66575
ENSRNOG00000013452	1.77551	5.5248	8.94995	1.78336e-05	0.000667236	3.24499	Rcn1	3	reticulocalbin 1	ENSG00000049449	RCN1	1	440034	6.38386	4.66575
ENSRNOG00000014475	-1.14837	5.68361	-8.93277	1.80899e-05	0.000667236	3.23124	Slc31a1	5	solute carrier family 31 member 1	ENSG00000136868	SLC31A1	1	1317	5.12521	6.24202
ENSRNOG00000000264	-1.35865	6.06673	-8.94195	1.79524e-05	0.000667236	3.22402	Def8	19	differentially expressed in FDCP 8 homolog	ENSG00000140995	DEF8	1	54849	5.39571	6.73775
ENSRNOG00000021611	1.3107	5.50883	8.92837	1.81562e-05	0.000667654	3.21391	Clip2	12	CAP-GLY domain containing linker protein 2	ENSG00000106665	CLIP2	1	7461	6.15209	4.86557
ENSRNOG00000029735	2.18369	3.66284	8.91815	1.83113e-05	0.000671321	3.44684	Pid1	9	phosphotyrosine interaction domain containing 1	ENSG00000153823	PID1	1	55022	4.73605	2.58963
ENSRNOG00000000168	-2.06276	9.62212	-8.9069	1.84836e-05	0.000675598	3.32697	Gatm	3	glycine amidinotransferase	ENSG00000171766	GATM	1	2628	8.56286	10.6814
ENSRNOG00000032374	-2.71189	4.05524	-8.89431	1.86787e-05	0.000676282	3.4761	Paqr9	8	progestin and adipoQ receptor family member 9	ENSG00000188582	PAQR9	1	344838	2.76049	5.34999
ENSRNOG00000017703	1.79508	4.49916	8.89554	1.86596e-05	0.000676282	3.30001	Unc93b1	1	unc-93 homolog B1 (C. elegans)	ENSG00000110057	UNC93B1	1	81622	5.36153	3.6368
ENSRNOG00000007197	-1.12894	5.42487	-8.89133	1.87252e-05	0.000676282	3.22086	Nr1h4	7	nuclear receptor subfamily 1, group H, member 4	ENSG00000012504	NR1H4	1	9971	4.85312	5.99663
ENSRNOG00000016509	-1.05971	6.38409	-8.89504	1.86673e-05	0.000676282	3.15971	Usp10	19	ubiquitin specific peptidase 10	ENSG00000103194	USP10	1	9100	5.84324	6.92494
ENSRNOG00000016099	-2.30187	5.61765	-8.88075	1.88914e-05	0.000679335	3.25523	Id4	17	inhibitor of DNA binding 4, HLH protein	ENSG00000172201	ID4	1	3400	4.50704	6.72825
ENSRNOG00000008755	-1.92422	8.63811	-8.87883	1.89217e-05	0.000679335	3.23856	Acox1	10	acyl-CoA oxidase 1	ENSG00000161533	ACOX1	1	51	7.69901	9.57721
ENSRNOG00000003348	2.49766	2.93178	8.86087	1.9208e-05	0.000680401	3.4684	Rasd1	10	ras related dexamethasone induced 1	ENSG00000108551	RASD1	1	51655	4.14158	1.72199
ENSRNOG00000006030	3.43748	2.07574	8.86069	1.9211e-05	0.000680401	3.45024	Ptprz1	4	protein tyrosine phosphatase, receptor type Z1	ENSG00000106278	PTPRZ1	1	5803	3.71684	0.434643
ENSRNOG00000004226	1.69065	3.25588	8.85865	1.92437e-05	0.000680401	3.42531	Irak3	7	interleukin-1 receptor-associated kinase 3	ENSG00000090376	IRAK3	1	11213	4.08733	2.42443
ENSRNOG00000036984	-5.12469	5.74248	-8.86632	1.91206e-05	0.000680401	3.41433	Slco1a1	4	solute carrier organic anion transporter family, member 1a1	ENSG00000084453	SLCO1A2	1	6579	3.38397	8.10098
ENSRNOG00000057557	-3.34142	5.36603	-8.84942	1.93931e-05	0.000680401	3.32441	Prlr	2	prolactin receptor	ENSG00000113494	PRLR	1	5618	3.79149	6.94057
ENSRNOG00000011936	-2.05915	4.8408	-8.8482	1.94129e-05	0.000680401	3.30493	Abhd14a	8	abhydrolase domain containing 14A	ENSG00000248487	ABHD14A	1	25864	3.86728	5.81432
ENSRNOG00000002832	-1.30395	5.11324	-8.84342	1.94908e-05	0.000680401	3.21611	Slc16a2	X	solute carrier family 16 member 2	ENSG00000147100	SLC16A2	1	6567	4.41683	5.80965
ENSRNOG00000009195	0.951015	6.70953	8.86511	1.91401e-05	0.000680401	3.13828	Tnks1bp1	3	tankyrase 1 binding protein 1	ENSG00000149115	TNKS1BP1	1	85456	7.1778	6.24126
ENSRNOG00000019616	-1.53105	7.32548	-8.83957	1.95538e-05	0.000680401	3.12938	Prss8	1	protease, serine, 8	ENSG00000052344	PRSS8	1	5652	6.57066	8.0803
ENSRNOG00000008788	-1.18552	6.12548	-8.84539	1.94587e-05	0.000680401	3.12738	Mpp5	6	membrane palmitoylated protein 5	ENSG00000072415	MPP5	1	64398	5.5684	6.68256
ENSRNOG00000043201	-1.24954	6.24977	-8.8387	1.95682e-05	0.000680401	3.11885	Coq8a	13	coenzyme Q8A	ENSG00000163050	COQ8A	1	56997	5.60603	6.89351
ENSRNOG00000009331	2.4178	2.76916	8.82607	1.97766e-05	0.000684028	3.43914	Hck	3	HCK proto-oncogene, Src family tyrosine kinase	ENSG00000101336	HCK	1	3055	3.96105	1.57727
ENSRNOG00000013770	-2.98626	3.06114	-8.82228	1.98397e-05	0.000684028	3.4374	Folh1	1	folate hydrolase 1	ENSG00000086205	FOLH1	1	2346	1.54129	4.58099
ENSRNOG00000013770	-2.98626	3.06114	-8.82228	1.98397e-05	0.000684028	3.4374	Folh1	1	folate hydrolase 1	ENSG00000086205	FOLH1	1	219595	1.54129	4.58099
ENSRNOG00000017220	1.37734	4.29516	8.82217	1.98416e-05	0.000684028	3.25677	Tcirg1	1	T-cell immune regulator 1, ATPase H+ transporting V0 subunit A3	ENSG00000110719	TCIRG1	1	10312	4.97258	3.61774
ENSRNOG00000001953	2.03734	3.25329	8.81869	1.98996e-05	0.000684086	3.40144	Bace2	11	beta-site APP-cleaving enzyme 2	ENSG00000182240	BACE2	1	25825	4.24345	2.26312
ENSRNOG00000001704	2.68235	1.39618	8.81014	2.00431e-05	0.000687072	3.35373	Runx1	11	runt-related transcription factor 1	ENSG00000159216	RUNX1	1	861	2.81871	-0.0263397
ENSRNOG00000001704	2.68235	1.39618	8.81014	2.00431e-05	0.000687072	3.35373	Runx1	11	runt-related transcription factor 1	ENSG00000159216	RUNX1	1	100506403	2.81871	-0.0263397
ENSRNOG00000001792	-1.81063	4.44556	-8.80511	2.01281e-05	0.000688041	3.31042	Slc12a8	11	solute carrier family 12, member 8	ENSG00000221955	SLC12A8	1	84561	3.5407	5.35042
ENSRNOG00000002174	0.895411	5.18356	8.8014	2.01911e-05	0.000688257	3.12192	Cwh43	14	cell wall biogenesis 43 C-terminal homolog	ENSG00000109182	CWH43	1	80157	5.6332	4.73391
ENSRNOG00000017307	1.21163	7.63308	8.79099	2.03688e-05	0.000688512	3.12519	Prss23	1	protease, serine, 23	ENSG00000150687	PRSS23	1	11098	8.21496	7.0512
ENSRNOG00000020284	-1.43202	5.75152	-8.79533	2.02946e-05	0.000688512	3.11747	Prkar2a	8	protein kinase cAMP-dependent type 2 regulatory subunit alpha	ENSG00000114302	PRKAR2A	1	5576	5.09155	6.41149
ENSRNOG00000008422	4.91531	-1.09079	8.79167	2.03572e-05	0.000688512	2.80187	Lpo	10	lactoperoxidase	ENSG00000167419	LPO	1	4025	1.23685	-3.41844
ENSRNOG00000013895	1.29943	5.82608	8.78749	2.0429e-05	0.000688627	3.07173	Npdc1	3	neural proliferation, differentiation and control, 1	ENSG00000107281	NPDC1	1	56654	6.45551	5.19665
ENSRNOG00000005849	-1.83882	8.08903	-8.78111	2.05392e-05	0.000690423	3.11534	Aco1	5	aconitase 1	ENSG00000122729	ACO1	1	48	7.16276	9.0153
ENSRNOG00000023628	-1.09454	5.75165	-8.77323	2.06763e-05	0.000693112	3.07969	Tmem106a	10	transmembrane protein 106A	ENSG00000184988	TMEM106A	1	113277	5.22421	6.27909
ENSRNOG00000010691	2.25941	3.1669	8.76174	2.08777e-05	0.000697748	3.35865	Cmtm3	19	CKLF-like MARVEL transmembrane domain containing 3	ENSG00000140931	CMTM3	1	123920	4.25834	2.07546
ENSRNOG00000025710	9.6701	1.02193	8.75847	2.09355e-05	0.000697748	3.044	Ces5a	19	carboxylesterase 5A	ENSG00000159398	CES5A	1	221223	5.99375	-3.9499
ENSRNOG00000047781	-0.852144	6.65396	-8.75556	2.09871e-05	0.000697748	3.02842	Slc25a23	9	solute carrier family 25 member 23	ENSG00000125648	SLC25A23	1	79085	6.22328	7.08464
ENSRNOG00000017930	1.55819	4.35726	8.75054	2.10763e-05	0.000698801	3.18521	Lpcat1	1	lysophosphatidylcholine acyltransferase 1	ENSG00000153395	LPCAT1	1	79888	5.11665	3.59787
ENSRNOG00000050430	2.53855	2.17335	8.73709	2.13176e-05	0.000701584	3.36876	Vav1	9	vav guanine nucleotide exchange factor 1	ENSG00000141968	VAV1	1	7409	3.37573	0.970961
ENSRNOG00000007865	2.38777	2.67761	8.733	2.13915e-05	0.000701584	3.36405	Ephb1	8	Eph receptor B1	ENSG00000154928	EPHB1	1	2047	3.84698	1.50823
ENSRNOG00000058645	3.17844	3.87466	8.73358	2.13811e-05	0.000701584	3.28483	Tnc	5	tenascin C	ENSG00000041982	TNC	1	3371	5.42476	2.32455
ENSRNOG00000019838	1.67373	4.03383	8.74247	2.12207e-05	0.000701584	3.22829	Gmfg	1	glia maturation factor, gamma	ENSG00000130755	GMFG	1	9535	4.82468	3.24298
ENSRNOG00000000521	1.80422	4.27312	8.72129	2.1605e-05	0.000701891	3.19492	Cdkn1a	20	cyclin-dependent kinase inhibitor 1A	ENSG00000124762	CDKN1A	1	1026	5.08842	3.45782
ENSRNOG00000062101	-1.01724	5.30588	-8.72614	2.15163e-05	0.000701891	3.07875	Ace	10	angiotensin I converting enzyme	ENSG00000159640	ACE	1	1636	4.81557	5.79618
ENSRNOG00000056786	0.912266	5.20773	8.72451	2.15461e-05	0.000701891	3.04919	Piezo1	19	piezo-type mechanosensitive ion channel component 1	ENSG00000103335	PIEZO1	1	9780	5.67131	4.74415
ENSRNOG00000005602	-1.54246	7.3794	-8.7198	2.16322e-05	0.000701891	3.02313	Mthfd1	6	methylenetetrahydrofolate dehydrogenase, cyclohydrolase and formyltetrahydrofolate synthetase 1	ENSG00000100714	MTHFD1	1	4522	6.61519	8.14362
ENSRNOG00000060614	1.84774	4.7423	8.70447	2.19157e-05	0.000703562	3.09662	Pxdn	6	peroxidasin	ENSG00000130508	PXDN	1	7837	5.65593	3.82867
ENSRNOG00000052219	1.69903	7.2134	8.70979	2.18169e-05	0.000703562	3.03576	Gm2a	10	GM2 ganglioside activator	ENSG00000196743	GM2A	1	2760	7.99629	6.43052
ENSRNOG00000018815	3.87694	0.0837453	8.70693	2.18699e-05	0.000703562	2.93371	Plk1	1	polo-like kinase 1	ENSG00000166851	PLK1	1	5347	2.1207	-1.95321
ENSRNOG00000061857	3.83545	-0.0167585	8.70852	2.18404e-05	0.000703562	2.86413	Mgst2	2	microsomal glutathione S-transferase 2	ENSG00000085871	MGST2	1	4258	1.82336	-1.85687
ENSRNOG00000020525	3.39708	2.53307	8.69481	2.20963e-05	0.000707489	3.33727	Col5a3	8	collagen type V alpha 3 chain	ENSG00000080573	COL5A3	1	50509	4.09406	0.972079
ENSRNOG00000060773	1.69675	3.15775	8.68791	2.22262e-05	0.000709777	3.28935	Sertad4	13	SERTA domain containing 4	ENSG00000082497	SERTAD4	1	56256	4.03986	2.27565
ENSRNOG00000012172	2.46841	3.15705	8.67677	2.2438e-05	0.000711181	3.29091	Spi1	3	Spi-1 proto-oncogene	ENSG00000066336	SPI1	1	6688	4.29598	2.01811
ENSRNOG00000001739	4.15838	1.3095	8.66778	2.26106e-05	0.000711181	3.21783	Meltf	11	melanotransferrin	ENSG00000163975	MELTF	1	4241	3.6167	-0.997701
ENSRNOG00000010214	-1.39362	5.50026	-8.6704	2.25602e-05	0.000711181	3.02369	Scrn2	10	secernin 2	ENSG00000141295	SCRN2	1	90507	4.76631	6.2342
ENSRNOG00000025001	1.5364	5.30485	8.66835	2.25996e-05	0.000711181	2.99717	Pcolce	12	procollagen C-endopeptidase enhancer	ENSG00000106333	PCOLCE	1	5118	6.0368	4.5729
ENSRNOG00000015442	0.999152	5.82253	8.6672	2.26218e-05	0.000711181	2.95427	Sfxn3	1	sideroflexin 3	ENSG00000107819	SFXN3	1	81855	6.31896	5.32609
ENSRNOG00000050714	4.90129	-1.52463	8.6767	2.24395e-05	0.000711181	2.69419	Islr2	8	immunoglobulin superfamily containing leucine-rich repeat 2	ENSG00000167178	ISLR2	1	57611	0.895511	-3.94478
ENSRNOG00000018785	-1.57774	5.48775	-8.66044	2.27525e-05	0.00071195	3.02448	Slc16a13	10	solute carrier family 16, member 13	ENSG00000174327	SLC16A13	1	201232	4.69333	6.28218
ENSRNOG00000023463	1.41917	5.0564	8.65987	2.27636e-05	0.00071195	3.01474	Parp9	11	poly (ADP-ribose) polymerase family, member 9	ENSG00000138496	PARP9	1	83666	5.7425	4.37031
ENSRNOG00000026870	5.13528	-1.16405	8.65408	2.28764e-05	0.000713639	2.75075	Clic6	11	chloride intracellular channel 6	ENSG00000159212	CLIC6	1	54102	1.50229	-3.83039
ENSRNOG00000014464	2.62644	2.53624	8.64446	2.30651e-05	0.000713867	3.29466	Tnfsf13b	16	tumor necrosis factor superfamily member 13b	ENSG00000102524	TNFSF13B	1	10673	3.81256	1.25992
ENSRNOG00000057367	-1.22805	9.04064	-8.64172	2.31191e-05	0.000713867	3.05196	Glud1	16	glutamate dehydrogenase 1	ENSG00000148672	GLUD1	1	2746	8.4148	9.66648
ENSRNOG00000057367	-1.22805	9.04064	-8.64172	2.31191e-05	0.000713867	3.05196	Glud1	16	glutamate dehydrogenase 1	ENSG00000182890	GLUD2	1	2747	8.4148	9.66648
ENSRNOG00000020736	-1.61009	5.33649	-8.64888	2.29783e-05	0.000713867	3.03201	Nadsyn1	1	NAD synthetase 1	ENSG00000172890	NADSYN1	1	55191	4.54512	6.12786
ENSRNOG00000029047	-1.60883	8.17589	-8.64568	2.30411e-05	0.000713867	2.99921	Cubn	17	cubilin	ENSG00000107611	CUBN	1	8029	7.36596	8.98582
ENSRNOG00000023851	1.14227	4.71908	8.63499	2.32525e-05	0.000716165	3.02483	Igsf3	2	immunoglobulin superfamily, member 3	ENSG00000143061	IGSF3	1	3321	5.31161	4.12656
ENSRNOG00000008588	4.8817	-0.917096	8.62196	2.35131e-05	0.000722358	2.71391	Batf	6	basic leucine zipper ATF-like transcription factor	ENSG00000156127	BATF	1	10538	1.34042	-3.17461
ENSRNOG00000019737	0.915111	7.17484	8.61077	2.37396e-05	0.000727476	2.92827	Sema4a	2	semaphorin 4A	ENSG00000196189	SEMA4A	1	64218	7.62412	6.72555
ENSRNOG00000061213	-0.935101	5.19025	-8.59545	2.40537e-05	0.00072791	2.96887	Mrps36	2	mitochondrial ribosomal protein S36	ENSG00000134056	MRPS36	1	92259	4.73315	5.64735
ENSRNOG00000003253	-1.61809	8.31118	-8.596	2.40423e-05	0.00072791	2.96127	Qdpr	14	quinoid dihydropteridine reductase	ENSG00000151552	QDPR	1	5860	7.48772	9.13464
ENSRNOG00000015807	-1.59341	7.77381	-8.60173	2.39244e-05	0.00072791	2.93547	Pyroxd2	1	pyridine nucleotide-disulphide oxidoreductase domain 2	ENSG00000119943	PYROXD2	1	84795	7.0021	8.54552
ENSRNOG00000019387	1.09425	6.86767	8.60241	2.39104e-05	0.00072791	2.90767	Ifi30	16	IFI30, lysosomal thiol reductase	ENSG00000216490	IFI30	1	10437	7.37171	6.36363
ENSRNOG00000056325	-1.20267	6.13219	-8.59747	2.4012e-05	0.00072791	2.90061	Mocs2	2	molybdenum cofactor synthesis 2	ENSG00000164172	MOCS2	1	4338	5.52865	6.73573
ENSRNOG00000032871	-6.5911	2.26406	-8.59156	2.4134e-05	0.000728523	2.75756	Mlc1	7	megalencephalic leukoencephalopathy with subcortical cysts 1	ENSG00000100427	MLC1	1	23209	-0.859951	5.38808
ENSRNOG00000015401	-2.56233	3.60675	-8.57401	2.45009e-05	0.000732312	3.22376	Mapk4	18	mitogen-activated protein kinase 4	ENSG00000141639	MAPK4	1	5596	2.34346	4.87004
ENSRNOG00000014448	-1.43267	5.078	-8.57567	2.4466e-05	0.000732312	2.99092	Arntl	1	aryl hydrocarbon receptor nuclear translocator-like	ENSG00000133794	ARNTL	1	406	4.40728	5.74871
ENSRNOG00000000729	-2.71133	6.85332	-8.57838	2.4409e-05	0.000732312	2.91638	Tmlhe	20	trimethyllysine hydroxylase, epsilon	ENSG00000185973	TMLHE	1	55217	5.54473	8.16191
ENSRNOG00000007637	1.04179	7.19665	8.57685	2.44411e-05	0.000732312	2.90044	Acer2	5	alkaline ceramidase 2	ENSG00000177076	ACER2	1	340485	7.74613	6.64717
ENSRNOG00000024019	-1.46676	4.68833	-8.56798	2.46284e-05	0.000734313	3.02956	Ccdc6	20	coiled-coil domain containing 6	ENSG00000108091	CCDC6	1	8030	3.9759	5.40075
ENSRNOG00000003442	2.5048	3.15179	8.55929	2.48132e-05	0.00073774	3.18611	Adora1	13	adenosine A1 receptor	ENSG00000163485	ADORA1	1	134	4.4836	1.81998
ENSRNOG00000021161	2.28771	3.65054	8.55687	2.48649e-05	0.00073774	3.12923	Fermt3	1	fermitin family member 3	ENSG00000149781	FERMT3	1	83706	4.75736	2.54372
ENSRNOG00000012989	2.20061	4.23318	8.54982	2.50164e-05	0.000740426	3.04614	Serinc2	5	serine incorporator 2	ENSG00000168528	SERINC2	1	347735	5.35755	3.10881
ENSRNOG00000058120	-2.04235	5.73974	-8.53915	2.52478e-05	0.000745456	2.91485	Tinag	8	tubulointerstitial nephritis antigen	ENSG00000137251	TINAG	1	27283	4.75459	6.72489
ENSRNOG00000020652	1.98635	5.22433	8.52749	2.55033e-05	0.000747542	2.8904	Tgfb1	1	transforming growth factor, beta 1	ENSG00000105329	TGFB1	1	7040	6.12998	4.31868
ENSRNOG00000050404	0.999198	6.80852	8.53039	2.54395e-05	0.000747542	2.83516	Pmepa1	3	prostate transmembrane protein, androgen induced 1	ENSG00000124225	PMEPA1	1	56937	7.32053	6.2965
ENSRNOG00000018730	1.31041	6.17928	8.52948	2.54595e-05	0.000747542	2.82873	Nectin2	1	nectin cell adhesion molecule 2	ENSG00000130202	NECTIN2	1	5819	6.78446	5.57411
ENSRNOG00000014099	5.2816	2.05862	8.51736	2.57275e-05	0.000748689	3.10062	Krt15	10	keratin 15	ENSG00000171346	KRT15	1	3866	4.54444	-0.427199
ENSRNOG00000019308	1.4456	3.85663	8.51893	2.56927e-05	0.000748689	3.05322	Arrb2	10	arrestin, beta 2	ENSG00000141480	ARRB2	1	409	4.53893	3.17432
ENSRNOG00000007258	-1.67571	4.90895	-8.5174	2.57267e-05	0.000748689	2.97724	Sbspon	5	somatomedin B and thrombospondin, type 1 domain containing	ENSG00000164764	SBSPON	1	157869	4.09879	5.71911
ENSRNOG00000005987	-1.39632	6.68903	-8.51307	2.58231e-05	0.000749673	2.81453	Suox	7	sulfite oxidase	ENSG00000139531	SUOX	1	6821	5.99975	7.3783
ENSRNOG00000002254	-0.955519	6.13379	-8.50339	2.60405e-05	0.00075418	2.80428	Tmem33	14	transmembrane protein 33	ENSG00000109133	TMEM33	1	55161	5.66926	6.59832
ENSRNOG00000006963	3.53899	2.6784	8.49168	2.63059e-05	0.000756451	3.16793	Ctse	13	cathepsin E	ENSG00000196188	CTSE	1	1510	4.36853	0.988268
ENSRNOG00000025088	-2.2961	3.33206	-8.4929	2.62781e-05	0.000756451	3.16212	Tmc3	1	transmembrane channel-like 3	ENSG00000188869	TMC3	1	342125	2.22996	4.43417
ENSRNOG00000002667	3.61381	4.59867	8.49277	2.62812e-05	0.000756451	3.00872	Lamc2	13	laminin subunit gamma 2	ENSG00000058085	LAMC2	1	3918	6.45642	2.74092
ENSRNOG00000023428	2.90743	1.59461	8.4841	2.64795e-05	0.000757851	3.11923	Pik3r5	10	phosphoinositide-3-kinase, regulatory subunit 5	ENSG00000141506	PIK3R5	1	23533	3.05101	0.138213
ENSRNOG00000003703	1.76607	3.39494	8.48574	2.64419e-05	0.000757851	3.07966	Mcm6	13	minichromosome maintenance complex component 6	ENSG00000076003	MCM6	1	4175	4.27204	2.51784
ENSRNOG00000012160	1.49464	4.48788	8.4774	2.6634e-05	0.000760479	2.91	Syk	17	spleen associated tyrosine kinase	ENSG00000165025	SYK	1	6850	5.24746	3.72831
ENSRNOG00000034290	3.36279	5.43797	8.47069	2.67895e-05	0.000761401	2.89585	Ccl21	5	C-C motif chemokine ligand 21	ENSG00000137077	CCL21	1	6366	7.02604	3.84989
ENSRNOG00000007804	-0.8999	6.253	-8.4706	2.67918e-05	0.000761401	2.76787	C1galt1	4	core 1 synthase, glycoprotein-N-acetylgalactosamine 3-beta-galactosyltransferase, 1	ENSG00000106392	C1GALT1	1	56913	5.80855	6.69746
ENSRNOG00000011774	2.65508	4.12032	8.46186	2.69959e-05	0.00076541	2.98667	Fblim1	5	filamin binding LIM protein 1	ENSG00000162458	FBLIM1	1	54751	5.44406	2.79658
ENSRNOG00000028616	-4.23389	7.98812	-8.45339	2.71956e-05	0.000769274	2.84285	Pck1	3	phosphoenolpyruvate carboxykinase 1	ENSG00000124253	PCK1	1	5105	5.86686	10.1094
ENSRNOG00000016281	1.65845	8.82518	8.44879	2.73046e-05	0.000770561	2.89247	Col4a1	16	collagen type IV alpha 1 chain	ENSG00000187498	COL4A1	1	1282	9.60275	8.04761
ENSRNOG00000003567	-1.34032	5.2566	-8.44343	2.74325e-05	0.000772374	2.84113	Ppox	13	protoporphyrinogen oxidase	ENSG00000143224	PPOX	1	5498	4.58112	5.93209
ENSRNOG00000029590	-2.53126	3.54093	-8.43383	2.76628e-05	0.000773975	3.10588	Spatc1	7	spermatogenesis and centriole associated 1	ENSG00000186583	SPATC1	1	375686	2.35073	4.73113
ENSRNOG00000018940	-2.56677	3.69934	-8.43306	2.76814e-05	0.000773975	3.09579	Slc28a1	1	solute carrier family 28 member 1	ENSG00000156222	SLC28A1	1	9154	2.44335	4.95533
ENSRNOG00000022967	-1.65879	5.56835	-8.43045	2.77445e-05	0.000773975	2.81032	Slc35d1	5	solute carrier family 35 member D1	ENSG00000116704	SLC35D1	1	23169	4.74308	6.39363
ENSRNOG00000019328	-1.37111	5.6687	-8.43399	2.7659e-05	0.000773975	2.78896	Phgdh	2	phosphoglycerate dehydrogenase	ENSG00000092621	PHGDH	1	26227	4.92348	6.41392
ENSRNOG00000042950	-2.64486	4.11551	-8.42453	2.7888e-05	0.000774419	3.04961	Slc5a9	5	solute carrier family 5 member 9	ENSG00000117834	SLC5A9	1	200010	2.8876	5.34341
ENSRNOG00000001414	3.101	4.47475	8.42612	2.78495e-05	0.000774419	2.92932	Serpine1	12	serpin family E member 1	ENSG00000106366	SERPINE1	1	5054	5.9595	2.99001
ENSRNOG00000008336	-1.93881	4.48125	-8.41707	2.80703e-05	0.000775929	2.95689	Tnfrsf11b	7	TNF receptor superfamily member 11B	ENSG00000164761	TNFRSF11B	1	4982	3.46036	5.50215
ENSRNOG00000023587	-2.37156	6.62868	-8.41745	2.80609e-05	0.000775929	2.7593	Dhtkd1	17	dehydrogenase E1 and transketolase domain containing 1	ENSG00000181192	DHTKD1	1	55526	5.50745	7.74991
ENSRNOG00000011929	-1.27446	7.6073	-8.40652	2.83302e-05	0.000779561	2.74328	Abcd3	2	ATP binding cassette subfamily D member 3	ENSG00000117528	ABCD3	1	5825	6.99723	8.21738
ENSRNOG00000015562	4.6307	-1.0411	8.40708	2.83164e-05	0.000779561	2.59553	Cdh17	5	cadherin 17	ENSG00000079112	CDH17	1	1015	1.33317	-3.41537
ENSRNOG00000012807	3.02147	4.71843	8.40273	2.84243e-05	0.000779697	2.88045	C1qa	5	complement C1q A chain	ENSG00000173372	C1QA	1	712	6.10728	3.32958
ENSRNOG00000052415	-1.76849	5.80829	-8.40064	2.84762e-05	0.000779697	2.76688	Gstt2	20	glutathione S-transferase, theta 2	ENSG00000133433	GSTT2B	1	653689	4.97297	6.64361
ENSRNOG00000052415	-1.76849	5.80829	-8.40064	2.84762e-05	0.000779697	2.76688	Gstt2	20	glutathione S-transferase, theta 2	ENSG00000099984	GSTT2	1	2953	4.97297	6.64361
ENSRNOG00000011446	-2.02946	7.06545	-8.39857	2.85278e-05	0.000779697	2.7229	Vill	8	villin-like	ENSG00000136059	VILL	1	50853	6.12712	8.00379
ENSRNOG00000008553	-1.75006	3.95348	-8.38738	2.88085e-05	0.000783837	2.99411	Mthfr	5	methylenetetrahydrofolate reductase	ENSG00000177000	MTHFR	1	4524	3.15345	4.75351
ENSRNOG00000006052	1.07456	6.36185	8.38802	2.87925e-05	0.000783837	2.69029	Sulf2	3	sulfatase 2	ENSG00000196562	SULF2	1	55959	6.88663	5.83707
ENSRNOG00000052064	2.28895	2.30304	8.37314	2.91705e-05	0.000785232	3.06703	Parvg	7	parvin, gamma	ENSG00000138964	PARVG	1	64098	3.38113	1.22496
ENSRNOG00000019270	2.51828	1.82303	8.37416	2.91443e-05	0.000785232	3.05517	P2ry6	1	pyrimidinergic receptor P2Y6	ENSG00000171631	P2RY6	1	5031	3.06444	0.581622
ENSRNOG00000013774	1.4817	2.92121	8.37987	2.89987e-05	0.000785232	3.04078	Lmnb1	18	lamin B1	ENSG00000113368	LMNB1	1	4001	3.68103	2.16138
ENSRNOG00000029993	-2.67623	4.76739	-8.37339	2.91639e-05	0.000785232	2.92011	Kynu	3	kynureninase	ENSG00000115919	KYNU	1	8942	3.4605	6.07427
ENSRNOG00000007136	1.12823	6.42358	8.37263	2.91833e-05	0.000785232	2.67807	Anxa7	15	annexin A7	ENSG00000138279	ANXA7	1	310	6.94534	5.90182
ENSRNOG00000021199	2.1146	3.04138	8.36145	2.94711e-05	0.000787734	3.0189	Fcgr1a	2	Fc fragment of IgG receptor Ia	ENSG00000150337	FCGR1A	1	2209	3.99922	2.08354
ENSRNOG00000021199	2.1146	3.04138	8.36145	2.94711e-05	0.000787734	3.0189	Fcgr1a	2	Fc fragment of IgG receptor Ia	ENSG00000198019	FCGR1B	0	2210	3.99922	2.08354
ENSRNOG00000057578	-2.61105	5.21414	-8.36422	2.93995e-05	0.000787734	2.84061	Prodh2	1	proline dehydrogenase 2	ENSG00000250799	PRODH2	1	58510	3.85127	6.57702
ENSRNOG00000017917	-2.43059	5.28044	-8.36276	2.94371e-05	0.000787734	2.8242	Cdhr2	17	cadherin-related family member 2	ENSG00000074276	CDHR2	1	54825	4.11709	6.4438
ENSRNOG00000061100	-1.23799	6.03845	-8.35305	2.96892e-05	0.000790084	2.67652	Tmem150a	4	transmembrane protein 150A	ENSG00000168890	TMEM150A	1	129303	5.43507	6.64183
ENSRNOG00000002408	-1.18136	6.59641	-8.35387	2.9668e-05	0.000790084	2.6596	Rbm47	14	RNA binding motif protein 47	ENSG00000163694	RBM47	1	54502	6.02961	7.16322
ENSRNOG00000016575	2.21036	3.08389	8.34307	2.9951e-05	0.000791075	2.99861	Tnfrsf1b	5	TNF receptor superfamily member 1B	ENSG00000028137	TNFRSF1B	1	7133	4.09662	2.07115
ENSRNOG00000017577	-1.43599	5.98229	-8.34169	2.99872e-05	0.000791075	2.67984	Bphl	17	biphenyl hydrolase like	ENSG00000137274	BPHL	1	670	5.26244	6.70213
ENSRNOG00000004448	-1.30668	7.00265	-8.34415	2.99225e-05	0.000791075	2.65839	Acss3	7	acyl-CoA synthetase short-chain family member 3	ENSG00000111058	ACSS3	1	79611	6.38202	7.62329
ENSRNOG00000007993	-1.05362	6.56532	-8.34609	2.98716e-05	0.000791075	2.64931	Sh3tc1	14	SH3 domain and tetratricopeptide repeats 1	ENSG00000125089	SH3TC1	1	54436	6.03217	7.09847
ENSRNOG00000042137	2.20526	3.16382	8.32554	3.04168e-05	0.000797208	2.96465	Tmem173	18	transmembrane protein 173	ENSG00000184584	STING1	1	340061	4.30283	2.02481
ENSRNOG00000018186	-0.895653	7.15184	-8.32754	3.03631e-05	0.000797208	2.64623	Lamtor5	2	late endosomal/lysosomal adaptor, MAPK and MTOR activator 5	ENSG00000134248	LAMTOR5	1	10542	6.69904	7.60464
ENSRNOG00000003300	1.10886	5.84198	8.32563	3.04143e-05	0.000797208	2.63799	Btg2	13	BTG anti-proliferation factor 2	ENSG00000159388	BTG2	1	7832	6.40896	5.275
ENSRNOG00000020656	-1.78137	3.66532	-8.30872	3.0871e-05	0.000807371	2.95434	Pfkfb4	8	6-phosphofructo-2-kinase/fructose-2,6-biphosphatase 4	ENSG00000114268	PFKFB4	1	5210	2.82374	4.50689
ENSRNOG00000014973	2.99779	1.13804	8.29647	3.12068e-05	0.000807637	2.91791	Tekt1	10	tektin 1	ENSG00000167858	TEKT1	1	83659	2.63734	-0.361274
ENSRNOG00000002783	-2.88165	4.98248	-8.29782	3.11697e-05	0.000807637	2.83209	Serpinc1	13	serpin family C member 1	ENSG00000117601	SERPINC1	1	462	3.51082	6.45414
ENSRNOG00000011582	1.16176	4.39607	8.30502	3.0972e-05	0.000807637	2.76733	Rab3d	8	RAB3D, member RAS oncogene family	ENSG00000105514	RAB3D	1	9545	4.96287	3.82928
ENSRNOG00000020704	-2.72999	7.59248	-8.29621	3.1214e-05	0.000807637	2.64799	Tkfc	1	triokinase and FMN cyclase	ENSG00000149476	TKFC	1	26007	6.2581	8.92686
ENSRNOG00000004964	-1.10569	7.05926	-8.2975	3.11785e-05	0.000807637	2.61461	Erbb3	7	erb-b2 receptor tyrosine kinase 3	ENSG00000065361	ERBB3	1	2065	6.54134	7.57717
ENSRNOG00000060381	3.82721	4.59993	8.29207	3.13283e-05	0.000808871	2.83913	Col15a1	5	collagen type XV alpha 1 chain	ENSG00000204291	COL15A1	1	1306	6.37513	2.82472
ENSRNOG00000000455	1.20519	5.49089	8.28901	3.14134e-05	0.000809345	2.62248	Tap2	20	transporter 2, ATP binding cassette subfamily B member	ENSG00000204267	TAP2	1	6891	6.08156	4.90022
ENSRNOG00000000455	1.20519	5.49089	8.28901	3.14134e-05	0.000809345	2.62248	Tap2	20	transporter 2, ATP binding cassette subfamily B member	ENSG00000250264	AL669918.1	1	NA	6.08156	4.90022
ENSRNOG00000008057	0.942945	8.14659	8.27404	3.18321e-05	0.000818394	2.67372	Krt7	7	keratin 7	ENSG00000135480	KRT7	1	3855	8.62646	7.66672
ENSRNOG00000024365	2.45058	2.00838	8.26628	3.20516e-05	0.000819067	2.97289	Ect2	2	epithelial cell transforming 2	ENSG00000114346	ECT2	1	1894	3.19399	0.822758
ENSRNOG00000008785	1.57994	3.39468	8.26084	3.22065e-05	0.000819067	2.88114	Klf5	15	Kruppel-like factor 5	ENSG00000102554	KLF5	1	688	4.19691	2.59245
ENSRNOG00000018570	-2.42042	4.51765	-8.25886	3.22632e-05	0.000819067	2.83438	C1qtnf3	2	C1q and tumor necrosis factor related protein 3	ENSG00000082196	C1QTNF3	1	114899	3.36394	5.67137
ENSRNOG00000018570	-2.42042	4.51765	-8.25886	3.22632e-05	0.000819067	2.83438	C1qtnf3	2	C1q and tumor necrosis factor related protein 3	ENSG00000273294	C1QTNF3-AMACR	1	NA	3.36394	5.67137
ENSRNOG00000013236	-1.13203	5.70787	-8.2646	3.20996e-05	0.000819067	2.61241	Samd8	15	sterile alpha motif domain containing 8	ENSG00000156671	SAMD8	1	142891	5.17932	6.23643
ENSRNOG00000050843	-1.33572	7.07253	-8.26959	3.19579e-05	0.000819067	2.58988	Mut	9	methylmalonyl CoA mutase	ENSG00000146085	MMUT	1	4594	6.44336	7.70169
ENSRNOG00000047466	5.09503	-1.41403	8.25896	3.22605e-05	0.000819067	2.47137	Bdnf	3	brain-derived neurotrophic factor	ENSG00000176697	BDNF	1	627	1.12907	-3.95713
ENSRNOG00000018414	1.80457	5.61383	8.25587	3.2349e-05	0.00081953	2.59939	Csf1r	18	colony stimulating factor 1 receptor	ENSG00000182578	CSF1R	1	1436	6.47028	4.75737
ENSRNOG00000055650	1.99929	2.33259	8.23828	3.28582e-05	0.000819984	2.9491	Pou2f2	1	POU class 2 homeobox 2	ENSG00000028277	POU2F2	1	5452	3.3738	1.29138
ENSRNOG00000007002	3.00266	1.97296	8.2365	3.29102e-05	0.000819984	2.93817	Lif	14	leukemia inhibitory factor	ENSG00000128342	LIF	1	3976	3.48515	0.460765
ENSRNOG00000008971	-3.02848	3.89905	-8.24767	3.25851e-05	0.000819984	2.93089	Hnf4g	2	hepatocyte nuclear factor 4, gamma	ENSG00000164749	HNF4G	1	3174	2.47159	5.3265
ENSRNOG00000011680	2.09057	2.96332	8.22968	3.31102e-05	0.000819984	2.90413	Il16	1	interleukin 16	ENSG00000172349	IL16	1	3603	4.02978	1.89686
ENSRNOG00000056184	-2.42907	10.4358	-8.23289	3.30159e-05	0.000819984	2.75692	Lrp2	3	LDL receptor related protein 2	ENSG00000081479	LRP2	1	4036	9.32085	11.5508
ENSRNOG00000000368	1.53538	4.24711	8.23101	3.30711e-05	0.000819984	2.71527	Grik2	20	glutamate ionotropic receptor kainate type subunit 2	ENSG00000164418	GRIK2	1	2898	5.07181	3.42242
ENSRNOG00000019810	2.1825	5.1775	8.23527	3.29462e-05	0.000819984	2.629	Des	9	desmin	ENSG00000175084	DES	1	1674	6.14411	4.21089
ENSRNOG00000013766	-1.28286	7.96381	-8.24131	3.27698e-05	0.000819984	2.60915	Acaa2	18	acetyl-CoA acyltransferase 2	ENSG00000167315	ACAA2	1	10449	7.26045	8.66717
ENSRNOG00000023334	1.32849	6.31833	8.24058	3.2791e-05	0.000819984	2.5564	Parp14	11	poly (ADP-ribose) polymerase family, member 14	ENSG00000173193	PARP14	1	54625	6.97072	5.66595
ENSRNOG00000008106	-1.24251	6.63016	-8.23579	3.29308e-05	0.000819984	2.5481	Shmt2	7	serine hydroxymethyltransferase 2	ENSG00000182199	SHMT2	1	6472	5.98482	7.2755
ENSRNOG00000024729	5.71093	-1.30133	8.2488	3.25526e-05	0.000819984	2.48179	Pax5	5	paired box 5	ENSG00000196092	PAX5	1	5079	1.34565	-3.9483
ENSRNOG00000006649	-1.16134	6.49361	-8.22655	3.32025e-05	0.000820594	2.53782	Thrb	15	thyroid hormone receptor beta	ENSG00000151090	THRB	1	7068	5.957	7.03022
ENSRNOG00000018971	1.77808	4.16516	8.2191	3.34233e-05	0.000823547	2.73156	Mob3a	7	MOB kinase activator 3A	ENSG00000172081	MOB3A	1	126308	5.02242	3.3079
ENSRNOG00000055471	0.872497	7.01869	8.21795	3.34577e-05	0.000823547	2.54822	Ywhah	14	tyrosine 3-monooxygenase/tryptophan 5-monooxygenase activation protein, eta	ENSG00000128245	YWHAH	1	7533	7.43159	6.60578
ENSRNOG00000018651	-0.861667	5.5236	-8.21562	3.35271e-05	0.000823587	2.57008	Agtpbp1	17	ATP/GTP binding protein 1	ENSG00000135049	AGTPBP1	1	23287	5.09443	5.95277
ENSRNOG00000018371	3.87486	2.43056	8.20308	3.39039e-05	0.000827814	2.92075	Tubb6	18	tubulin, beta 6 class V	ENSG00000176014	TUBB6	1	84617	4.31583	0.545286
ENSRNOG00000052887	-1.96501	3.05146	-8.20759	3.37678e-05	0.000827814	2.91727	Dnajc6	5	DnaJ heat shock protein family (Hsp40) member C6	ENSG00000116675	DNAJC6	1	9829	2.10169	4.00122
ENSRNOG00000059140	2.01344	2.60763	8.20432	3.38663e-05	0.000827814	2.90957	Myo1g	14	myosin IG	ENSG00000136286	MYO1G	1	64005	3.64148	1.57378
ENSRNOG00000011066	-1.54212	5.85808	-8.19778	3.40646e-05	0.000830069	2.55389	2006-03-01	2	membrane associated ring-CH-type finger 6	ENSG00000145495	MARCHF6	1	10299	5.16662	6.54953
ENSRNOG00000042592	2.30834	1.8011	8.17712	3.46987e-05	0.00083179	2.88635	Rgs10	1	regulator of G-protein signaling 10	ENSG00000148908	RGS10	1	6001	2.85702	0.745177
ENSRNOG00000046309	2.28154	2.56005	8.17204	3.48567e-05	0.00083179	2.88345	Gpr68	6	G protein-coupled receptor 68	ENSG00000119714	GPR68	1	8111	3.62355	1.49655
ENSRNOG00000018782	2.10388	1.59217	8.17133	3.48788e-05	0.00083179	2.87036	Gmnn	17	geminin, DNA replication inhibitor	ENSG00000112312	GMNN	1	51053	2.60711	0.577231
ENSRNOG00000061414	-4.36271	2.06321	-8.17337	3.48153e-05	0.00083179	2.73802	Acot12	2	acyl-CoA thioesterase 12	ENSG00000172497	ACOT12	1	134526	-0.134788	4.26121
ENSRNOG00000003884	-2.72443	5.6826	-8.17803	3.46705e-05	0.00083179	2.61649	Acmsd	13	aminocarboxymuconate semialdehyde decarboxylase	ENSG00000153086	ACMSD	1	130013	4.34137	7.02382
ENSRNOG00000039698	3.57779	0.216845	8.19052	3.42859e-05	0.00083179	2.60915	Prss22	10	protease, serine, 22	ENSG00000005001	PRSS22	1	64063	1.9861	-1.55241
ENSRNOG00000014168	-1.65754	7.47291	-8.171	3.48892e-05	0.00083179	2.51388	Xylb	8	xylulokinase	ENSG00000093217	XYLB	1	9942	6.67931	8.26652
ENSRNOG00000015655	1.35277	6.38459	8.18345	3.4503e-05	0.00083179	2.50352	Ptgfrn	2	prostaglandin F2 receptor inhibitor	ENSG00000134247	PTGFRN	1	5738	7.05541	5.71378
ENSRNOG00000017286	-1.37926	6.81753	-8.18188	3.45516e-05	0.00083179	2.50004	Ephx2	15	epoxide hydrolase 2	ENSG00000120915	EPHX2	1	2053	6.09729	7.53776
ENSRNOG00000000186	-1.62898	7.06363	-8.17134	3.48785e-05	0.00083179	2.49834	Tst	7	thiosulfate sulfurtransferase	ENSG00000128311	TST	1	7263	6.20581	7.92146
ENSRNOG00000013751	-1.33941	6.80327	-8.17979	3.46161e-05	0.00083179	2.49725	Prosc	16	proline synthetase co-transcribed homolog (bacterial)	ENSG00000147471	PLPBP	1	11212	6.14336	7.46317
ENSRNOG00000006735	4.2872	0.446508	8.16188	3.51751e-05	0.00083696	2.59479	Cdkn2b	5	cyclin-dependent kinase inhibitor 2B	ENSG00000147883	CDKN2B	1	1030	2.42546	-1.53244
ENSRNOG00000004168	1.50399	2.83753	8.14621	3.56723e-05	0.000839168	2.83978	Slc35e4	14	solute carrier family 35, member E4	ENSG00000100036	SLC35E4	1	339665	3.55631	2.11876
ENSRNOG00000008283	1.57691	4.36835	8.15233	3.54774e-05	0.000839168	2.62985	B4galt5	3	beta-1,4-galactosyltransferase 5	ENSG00000158470	B4GALT5	1	9334	5.10624	3.63047
ENSRNOG00000053469	1.31717	4.44449	8.1511	3.55164e-05	0.000839168	2.61501	Tmc6	10	transmembrane channel-like gene family 6	ENSG00000141524	TMC6	1	11322	5.07248	3.81649
ENSRNOG00000020948	-1.18723	7.92931	-8.14989	3.55551e-05	0.000839168	2.51884	Pth1r	8	parathyroid hormone 1 receptor	ENSG00000160801	PTH1R	1	5745	7.31259	8.54603
ENSRNOG00000011747	-1.17945	6.01381	-8.14589	3.56828e-05	0.000839168	2.4781	Tmem205	8	transmembrane protein 205	ENSG00000105518	TMEM205	1	374882	5.38871	6.63891
ENSRNOG00000029500	1.07547	6.51728	8.15212	3.5484e-05	0.000839168	2.4671	Tapbp	20	TAP binding protein	ENSG00000231925	TAPBP	1	6892	7.01199	6.02258
ENSRNOG00000007546	1.24668	3.74564	8.14134	3.58285e-05	0.000840964	2.7189	Asns	4	asparagine synthetase (glutamine-hydrolyzing)	ENSG00000070669	ASNS	1	440	4.32545	3.16583
ENSRNOG00000019555	1.04837	6.05112	8.13858	3.59175e-05	0.000841427	2.45037	Arap1	1	ArfGAP with RhoGAP domain, ankyrin repeat and PH domain 1	ENSG00000186635	ARAP1	1	116985	6.58442	5.51782
ENSRNOG00000009681	0.993747	7.17301	8.13119	3.61564e-05	0.000845391	2.47439	Flot2	10	flotillin 2	ENSG00000132589	FLOT2	1	2319	7.63401	6.712
ENSRNOG00000016325	-1.63072	4.69984	-8.12869	3.62378e-05	0.000845664	2.63543	F2	3	coagulation factor II	ENSG00000180210	F2	1	2147	3.91474	5.48493
ENSRNOG00000048043	1.12844	6.19205	8.12565	3.63369e-05	0.00084635	2.43876	F2r	2	coagulation factor II (thrombin) receptor	ENSG00000181104	F2R	1	2149	6.71928	5.66482
ENSRNOG00000030467	1.85125	2.25763	8.11163	3.67977e-05	0.000848274	2.8397	Ube2l6	3	ubiquitin-conjugating enzyme E2L 6	ENSG00000156587	UBE2L6	1	9246	3.1224	1.39286
ENSRNOG00000015279	2.40764	1.70015	8.12045	3.65072e-05	0.000848274	2.83888	Vtcn1	2	V-set domain containing T cell activation inhibitor 1	ENSG00000134258	VTCN1	1	79679	2.93408	0.466222
ENSRNOG00000008045	2.60566	2.06477	8.10938	3.68723e-05	0.000848274	2.8379	Slamf9	13	SLAM family member 9	ENSG00000162723	SLAMF9	1	89886	3.26555	0.863996
ENSRNOG00000018509	2.36828	1.73532	8.11541	3.6673e-05	0.000848274	2.83114	Cx3cr1	8	C-X3-C motif chemokine receptor 1	ENSG00000168329	CX3CR1	1	1524	2.88468	0.585964
ENSRNOG00000006699	-1.19582	4.57251	-8.11636	3.66416e-05	0.000848274	2.6166	Mlh3	6	mutL homolog 3	ENSG00000119684	MLH3	1	27030	4.01928	5.12574
ENSRNOG00000004361	1.12191	4.56694	8.10828	3.69088e-05	0.000848274	2.54887	Parp10	7	poly (ADP-ribose) polymerase family, member 10	ENSG00000178685	PARP10	1	84875	5.1188	4.01508
ENSRNOG00000014490	-1.61886	5.77493	-8.1097	3.68618e-05	0.000848274	2.48182	Bdh2	2	3-hydroxybutyrate dehydrogenase 2	ENSG00000164039	BDH2	1	56898	4.97771	6.57216
ENSRNOG00000028703	1.303	3.96781	8.09668	3.72966e-05	0.000850742	2.63733	Slc39a6	18	solute carrier family 39 member 6	ENSG00000141424	SLC39A6	1	25800	4.5974	3.33822
ENSRNOG00000020587	2.05982	4.72718	8.10123	3.71441e-05	0.000850742	2.54556	Efemp2	1	EGF-containing fibulin-like extracellular matrix protein 2	ENSG00000172638	EFEMP2	1	30008	5.66279	3.79158
ENSRNOG00000010430	3.31244	-0.150602	8.09673	3.72947e-05	0.000850742	2.44464	Tmem40	4	transmembrane protein 40	ENSG00000088726	TMEM40	1	55287	1.5422	-1.84341
ENSRNOG00000013269	1.22501	5.51504	8.09893	3.72211e-05	0.000850742	2.43883	Tnfsf10	2	tumor necrosis factor superfamily member 10	ENSG00000121858	TNFSF10	1	8743	6.10074	4.92933
ENSRNOG00000005809	1.9228	5.40263	8.09354	3.74024e-05	0.000851553	2.46531	Arhgdib	4	Rho GDP dissociation inhibitor beta	ENSG00000111348	ARHGDIB	1	397	6.30082	4.50444
ENSRNOG00000022868	-2.18996	3.73311	-8.085	3.76914e-05	0.000851887	2.7688	Ell3	3	elongation factor for RNA polymerase II 3	ENSG00000128886	ELL3	1	80237	2.71606	4.75016
ENSRNOG00000022071	-1.38923	3.95348	-8.08791	3.75925e-05	0.000851887	2.70069	Itga2b	10	integrin subunit alpha 2b	ENSG00000005961	ITGA2B	1	3674	3.26913	4.63782
ENSRNOG00000001158	1.72825	4.7228	8.08715	3.76182e-05	0.000851887	2.52283	Abcg1	20	ATP binding cassette subfamily G member 1	ENSG00000160179	ABCG1	1	9619	5.51901	3.92659
ENSRNOG00000008180	1.07386	5.3318	8.08481	3.76979e-05	0.000851887	2.435	Lyn	5	LYN proto-oncogene, Src family tyrosine kinase	ENSG00000254087	LYN	1	4067	5.83687	4.82672
ENSRNOG00000001425	2.36606	2.12261	8.07227	3.81268e-05	0.000858012	2.80647	Sh2b2	12	SH2B adaptor protein 2	ENSG00000160999	SH2B2	1	10603	3.22922	1.016
ENSRNOG00000024428	2.68115	1.47048	8.06569	3.83543e-05	0.000858012	2.76846	Kif20a	18	kinesin family member 20A	ENSG00000112984	KIF20A	1	10112	2.81049	0.130478
ENSRNOG00000012582	1.90497	3.30581	8.05668	3.86682e-05	0.000858012	2.71003	Eif4ebp1	16	eukaryotic translation initiation factor 4E binding protein 1	ENSG00000187840	EIF4EBP1	1	1978	4.17344	2.43818
ENSRNOG00000019358	-2.97992	4.70824	-8.06053	3.85335e-05	0.000858012	2.67208	Esr1	1	estrogen receptor 1	ENSG00000091831	ESR1	1	2099	3.36244	6.05405
ENSRNOG00000008061	1.34697	5.02069	8.07329	3.80917e-05	0.000858012	2.45841	Nuak1	7	NUAK family kinase 1	ENSG00000074590	NUAK1	1	9891	5.65859	4.38278
ENSRNOG00000032798	1.28529	4.97325	8.06378	3.84206e-05	0.000858012	2.45542	Slco3a1	1	solute carrier organic anion transporter family, member 3a1	ENSG00000176463	SLCO3A1	1	28232	5.55929	4.38721
ENSRNOG00000012123	-0.97984	5.51077	-8.06004	3.85506e-05	0.000858012	2.42633	Fdx1	8	ferredoxin 1	ENSG00000137714	FDX1	1	2230	4.997	6.02453
ENSRNOG00000034191	-2.68481	7.44481	-8.05491	3.87299e-05	0.000858012	2.41209	Fmo1	13	flavin containing monooxygenase 1	ENSG00000010932	FMO1	1	2326	6.09504	8.79458
ENSRNOG00000056038	1.42011	5.34334	8.0528	3.8804e-05	0.000858012	2.40895	Ehbp1l1	1	EH domain binding protein 1-like 1	ENSG00000173442	EHBP1L1	1	254102	6.00208	4.68461
ENSRNOG00000010697	-1.16929	7.51153	-8.06162	3.84958e-05	0.000858012	2.4063	Hadh	2	hydroxyacyl-CoA dehydrogenase	ENSG00000138796	HADH	1	3033	6.92561	8.09745
ENSRNOG00000017406	-1.45166	6.2006	-8.05242	3.88174e-05	0.000858012	2.38764	Atrnl1	1	attractin like 1	ENSG00000107518	ATRNL1	1	26033	5.55383	6.84737
ENSRNOG00000004951	-0.924899	6.03376	-8.06298	3.84486e-05	0.000858012	2.38528	Kif16b	3	kinesin family member 16B	ENSG00000089177	KIF16B	1	55614	5.60157	6.46595
ENSRNOG00000018693	-2.17212	3.01227	-8.04442	3.90996e-05	0.000861404	2.77759	Asgr1	10	asialoglycoprotein receptor 1	ENSG00000141505	ASGR1	1	432	1.96632	4.05823
ENSRNOG00000013668	2.05379	5.28877	8.04405	3.91128e-05	0.000861404	2.42567	Capg	4	capping actin protein, gelsolin like	ENSG00000042493	CAPG	1	822	6.32969	4.24785
ENSRNOG00000013805	1.23708	3.45644	8.03661	3.93772e-05	0.000865657	2.65535	Tnip2	14	TNFAIP3 interacting protein 2	ENSG00000168884	TNIP2	1	79155	4.10586	2.80702
ENSRNOG00000004409	2.44194	2.24028	8.0226	3.98809e-05	0.000867744	2.76169	Sash3	X	SAM and SH3 domain containing 3	ENSG00000122122	SASH3	1	54440	3.4081	1.07247
ENSRNOG00000011683	1.67245	3.06084	8.02228	3.98924e-05	0.000867744	2.70033	Fes	1	FES proto-oncogene, tyrosine kinase	ENSG00000182511	FES	1	2242	3.87573	2.24595
ENSRNOG00000009779	1.26606	7.80592	8.02148	3.99214e-05	0.000867744	2.41135	Krt8	7	keratin 8	ENSG00000170421	KRT8	1	3856	8.38386	7.22797
ENSRNOG00000028156	-1.05763	5.86389	-8.02945	3.96339e-05	0.000867744	2.37126	Pld1	2	phospholipase D1	ENSG00000075651	PLD1	1	5337	5.32892	6.39886
ENSRNOG00000015496	1.2324	6.88308	8.02988	3.96182e-05	0.000867744	2.3664	Tpm4	16	tropomyosin 4	ENSG00000167460	TPM4	1	7171	7.44981	6.31635
ENSRNOG00000016117	1.22544	6.7657	8.02272	3.98767e-05	0.000867744	2.35497	Myof	1	myoferlin	ENSG00000138119	MYOF	1	26509	7.42532	6.10608
ENSRNOG00000015408	-0.877203	6.58396	-8.02007	3.99727e-05	0.000867744	2.33089	Vil1	9	villin 1	ENSG00000127831	VIL1	1	7429	6.14063	7.02729
ENSRNOG00000014700	-3.17049	5.45505	-8.01522	4.01492e-05	0.000869155	2.52392	Ttc36	8	tetratricopeptide repeat domain 36	ENSG00000172425	TTC36	1	143941	3.95124	6.95886
ENSRNOG00000002305	-2.67499	7.16055	-8.01435	4.0181e-05	0.000869155	2.3718	Slc15a2	11	solute carrier family 15 member 2	ENSG00000163406	SLC15A2	1	6565	5.89776	8.42335
ENSRNOG00000039571	-1.68904	4.92323	-8.00862	4.03907e-05	0.000872138	2.49081	Glod5	X	glyoxalase domain containing 5	ENSG00000171433	GLOD5	1	392465	4.06823	5.77822
ENSRNOG00000001224	2.55961	4.4177	8.00593	4.04894e-05	0.000872716	2.51241	Itgb2	20	integrin subunit beta 2	ENSG00000160255	ITGB2	1	3689	5.63459	3.2008
ENSRNOG00000007437	1.8832	2.84295	8.00014	4.07031e-05	0.00087298	2.69961	Irf5	4	interferon regulatory factor 5	ENSG00000128604	IRF5	1	3663	3.75478	1.93111
ENSRNOG00000003388	3.18137	1.09055	7.99476	4.0903e-05	0.00087298	2.66572	Cenpf	13	centromere protein F	ENSG00000117724	CENPF	1	1063	2.71054	-0.529431
ENSRNOG00000006553	-1.20532	3.82845	-7.99009	4.10772e-05	0.00087298	2.61495	Bnc2	5	basonuclin 2	ENSG00000173068	BNC2	1	54796	3.22262	4.43428
ENSRNOG00000036711	1.7387	4.41718	7.99155	4.10229e-05	0.00087298	2.47097	Spn	1	sialophorin	ENSG00000197471	SPN	1	6693	5.27489	3.55948
ENSRNOG00000036711	1.7387	4.41718	7.99155	4.10229e-05	0.00087298	2.47097	Spn	1	sialophorin	ENSG00000197471	SPN	1	105369247	5.27489	3.55948
ENSRNOG00000014816	-1.69659	7.35464	-7.99908	4.07424e-05	0.00087298	2.34005	Slc1a1	1	solute carrier family 1 member 1	ENSG00000106688	SLC1A1	1	6505	6.57003	8.13925
ENSRNOG00000043503	-1.19905	7.22435	-7.99676	4.08286e-05	0.00087298	2.32878	Ehd1	1	EH-domain containing 1	ENSG00000110047	EHD1	1	10938	6.58603	7.86267
ENSRNOG00000057501	-0.957061	6.59382	-8.00343	4.05817e-05	0.00087298	2.31607	Fam81a	8	family with sequence similarity 81, member A	ENSG00000157470	FAM81A	1	145773	6.13996	7.04768
ENSRNOG00000011141	4.45682	-1.83856	7.99067	4.10557e-05	0.00087298	2.13067	Serpina11	6	serpin family A member 11	ENSG00000186910	SERPINA11	1	256394	0.265621	-3.94275
ENSRNOG00000049385	1.94891	4.39411	7.98502	4.12676e-05	0.000875494	2.48145	Adamtsl4	2	ADAMTS-like 4	ENSG00000143382	ADAMTSL4	1	54507	5.33109	3.45713
ENSRNOG00000014743	-1.70033	7.07231	-7.97969	4.14685e-05	0.00087822	2.31222	Hagh	10	hydroxyacyl glutathione hydrolase	ENSG00000063854	HAGH	1	3029	6.23378	7.91085
ENSRNOG00000038896	2.37673	2.29929	7.96531	4.2016e-05	0.000884522	2.70996	Upk3bl	12	uroplakin 3B-like	ENSG00000267368	UPK3BL1	1	100134938	3.53636	1.06223
ENSRNOG00000038896	2.37673	2.29929	7.96531	4.2016e-05	0.000884522	2.70996	Upk3bl	12	uroplakin 3B-like	ENSG00000267368	UPK3BL1	1	107983993	3.53636	1.06223
ENSRNOG00000038896	2.37673	2.29929	7.96531	4.2016e-05	0.000884522	2.70996	Upk3bl	12	uroplakin 3B-like	ENSG00000205236	AC105052.1	0	NA	3.53636	1.06223
ENSRNOG00000038896	2.37673	2.29929	7.96531	4.2016e-05	0.000884522	2.70996	Upk3bl	12	uroplakin 3B-like	ENSG00000284981	UPK3BL2	1	NA	3.53636	1.06223
ENSRNOG00000022218	1.46264	3.62224	7.96101	4.21813e-05	0.000884522	2.56483	Ifi44	2	interferon-induced protein 44	ENSG00000137965	IFI44	1	10561	4.33075	2.91372
ENSRNOG00000024426	-2.68392	5.10221	-7.96104	4.218e-05	0.000884522	2.48621	Mro	18	maestro	ENSG00000134042	MRO	1	83876	3.81372	6.39069
ENSRNOG00000020420	-2.03082	5.81903	-7.96138	4.21672e-05	0.000884522	2.36188	Pklr	2	pyruvate kinase, liver and RBC	ENSG00000143627	PKLR	1	5313	4.84307	6.795
ENSRNOG00000012911	-1.2377	5.90104	-7.96808	4.19099e-05	0.000884522	2.31422	Erlin1	1	ER lipid raft associated 1	ENSG00000107566	ERLIN1	1	10613	5.34079	6.46129
ENSRNOG00000008374	-1.43899	7.37726	-7.96044	4.22034e-05	0.000884522	2.3015	Nipsnap1	14	nipsnap homolog 1	ENSG00000184117	NIPSNAP1	1	8508	6.64573	8.10879
ENSRNOG00000008937	1.4305	8.25553	7.956	4.23748e-05	0.00088592	2.37755	Csrp1	13	cysteine and glycine-rich protein 1	ENSG00000159176	CSRP1	1	1465	8.90413	7.60692
ENSRNOG00000039300	-1.32916	7.91248	-7.95493	4.24161e-05	0.00088592	2.32961	Ahcyl2	4	adenosylhomocysteinase-like 2	ENSG00000158467	AHCYL2	1	23382	7.29319	8.53177
ENSRNOG00000014130	2.49688	0.70086	7.94657	4.27417e-05	0.000890816	2.56992	Cks2	17	CDC28 protein kinase regulatory subunit 2	ENSG00000123975	CKS2	1	1164	1.95713	-0.555413
ENSRNOG00000009113	2.25859	4.49074	7.94406	4.284e-05	0.000890816	2.43331	Marcksl1	5	MARCKS-like 1	ENSG00000175130	MARCKSL1	1	65108	5.55253	3.42894
ENSRNOG00000003533	-1.13921	5.30729	-7.94328	4.28707e-05	0.000890816	2.33907	Clcn4	X	chloride voltage-gated channel 4	ENSG00000073464	CLCN4	1	1183	4.75888	5.8557
ENSRNOG00000000441	1.54909	3.05468	7.94111	4.29559e-05	0.000890948	2.62751	Gpsm3	20	G-protein signaling modulator 3	ENSG00000213654	GPSM3	1	63940	3.80288	2.30648
ENSRNOG00000007922	1.61031	5.82791	7.93938	4.3024e-05	0.000890948	2.27644	Cldn19	5	claudin 19	ENSG00000164007	CLDN19	1	149461	6.59867	5.05715
ENSRNOG00000003648	1.46298	3.49039	7.93097	4.33565e-05	0.000896305	2.55369	Cldn6	10	claudin 6	ENSG00000184697	CLDN6	1	9074	4.22147	2.75931
ENSRNOG00000025991	-1.18474	6.08816	-7.92526	4.3584e-05	0.000899476	2.25797	Pex1	4	peroxisomal biogenesis factor 1	ENSG00000127980	PEX1	1	5189	5.54571	6.63061
ENSRNOG00000024874	2.96608	1.31134	7.92066	4.37681e-05	0.000901742	2.62826	Prtfdc1	17	phosphoribosyl transferase domain containing 1	ENSG00000099256	PRTFDC1	1	56952	2.68483	-0.0621445
ENSRNOG00000019246	1.03337	6.46334	7.91638	4.39403e-05	0.000903756	2.23381	Psme2	15	proteasome activator subunit 2	ENSG00000100911	PSME2	1	5721	6.93805	5.98862
ENSRNOG00000015159	-1.23636	6.84586	-7.9088	4.42469e-05	0.000908521	2.23193	Slc9a3	1	solute carrier family 9 member A3	ENSG00000066230	SLC9A3	1	6550	6.25054	7.44117
ENSRNOG00000060141	3.06813	0.952488	7.90508	4.43983e-05	0.000910091	2.56085	Epdr1	17	ependymin related 1	ENSG00000086289	EPDR1	1	54749	2.39834	-0.493362
ENSRNOG00000026490	1.85895	3.79416	7.90139	4.45494e-05	0.000911647	2.48404	Dnm3	13	dynamin 3	ENSG00000197959	DNM3	1	26052	4.65897	2.92935
ENSRNOG00000021536	3.50745	0.170791	7.8951	4.48073e-05	0.000913705	2.36587	Plxdc1	10	plexin domain containing 1	ENSG00000161381	PLXDC1	1	57125	1.95585	-1.61427
ENSRNOG00000017619	-1.20747	8.89496	-7.89549	4.47916e-05	0.000913705	2.33441	Aldh1a1	1	aldehyde dehydrogenase 1 family, member A1	ENSG00000165092	ALDH1A1	1	216	8.29142	9.49851
ENSRNOG00000025040	1.04949	5.19193	7.89344	4.48758e-05	0.000913705	2.26065	Gng10	5	G protein subunit gamma 10	ENSG00000242616	GNG10	1	2790	5.69558	4.68829
ENSRNOG00000013538	0.774911	6.02209	7.88585	4.51903e-05	0.000918566	2.19638	Capza1	2	capping actin protein of muscle Z-line alpha subunit 1	ENSG00000116489	CAPZA1	1	829	6.41182	5.63236
ENSRNOG00000037563	3.48372	2.87205	7.88361	4.52834e-05	0.000918921	2.6134	Cd68	10	Cd68 molecule	ENSG00000129226	CD68	1	968	4.5661	1.178
ENSRNOG00000027736	2.59441	2.40651	7.86219	4.61863e-05	0.000920333	2.61753	Cnn1	8	calponin 1	ENSG00000130176	CNN1	1	1264	3.53418	1.27885
ENSRNOG00000039668	3.79293	2.5839	7.86253	4.61718e-05	0.000920333	2.61506	Col8a1	11	collagen type VIII alpha 1 chain	ENSG00000144810	COL8A1	1	1295	4.44059	0.727216
ENSRNOG00000010721	2.49933	1.28862	7.86278	4.61613e-05	0.000920333	2.58294	Dlgap5	15	DLG associated protein 5	ENSG00000126787	DLGAP5	1	9787	2.50187	0.0753708
ENSRNOG00000013886	1.49496	3.42572	7.85384	4.65438e-05	0.000920333	2.48869	Fyb	2	FYN binding protein	ENSG00000082074	FYB1	1	2533	4.20917	2.64227
ENSRNOG00000019100	3.10077	0.0331621	7.87228	4.57587e-05	0.000920333	2.34346	Kif2c	5	kinesin family member 2C	ENSG00000142945	KIF2C	1	11004	1.54342	-1.47709
ENSRNOG00000018009	1.10127	4.43272	7.85619	4.64426e-05	0.000920333	2.32698	Rab8b	8	RAB8B, member RAS oncogene family	ENSG00000166128	RAB8B	1	51762	4.97569	3.88975
ENSRNOG00000004578	5.97137	-0.427486	7.85331	4.65665e-05	0.000920333	2.31427	Cthrc1	7	collagen triple helix repeat containing 1	ENSG00000164932	CTHRC1	1	115908	2.31872	-3.17369
ENSRNOG00000017744	-1.41456	5.14434	-7.86578	4.60335e-05	0.000920333	2.2978	Dram2	2	DNA-damage regulated autophagy modulator 2	ENSG00000156171	DRAM2	1	128338	4.47003	5.81864
ENSRNOG00000003960	-1.8108	8.85564	-7.86229	4.61821e-05	0.000920333	2.29459	Tmem27	X	transmembrane protein 27	ENSG00000285602	AC097625.1	0	NA	7.91759	9.79369
ENSRNOG00000003960	-1.8108	8.85564	-7.86229	4.61821e-05	0.000920333	2.29459	Tmem27	X	transmembrane protein 27	ENSG00000147003	CLTRN	1	57393	7.91759	9.79369
ENSRNOG00000005438	4.1697	-0.427764	7.85379	4.65459e-05	0.000920333	2.2546	Pcsk2	3	proprotein convertase subtilisin/kexin type 2	ENSG00000125851	PCSK2	1	5126	1.62187	-2.4774
ENSRNOG00000058568	3.97244	-0.266973	7.86535	4.60519e-05	0.000920333	2.25122	Dhrs9	3	dehydrogenase/reductase 9	ENSG00000073737	DHRS9	1	10170	1.57763	-2.11157
ENSRNOG00000014170	1.2464	5.34736	7.87468	4.56575e-05	0.000920333	2.23055	Dbn1	17	drebrin 1	ENSG00000113758	DBN1	1	1627	5.92315	4.77157
ENSRNOG00000051483	1.8559	5.9332	7.87222	4.57613e-05	0.000920333	2.2173	LOC103689961	1	selenoprotein W-like	ENSG00000178980	SELENOW	1	6415	6.74613	5.12027
ENSRNOG00000018669	0.930129	5.51361	7.8692	4.58889e-05	0.000920333	2.20478	Jak3	16	Janus kinase 3	ENSG00000105639	JAK3	1	3718	5.99847	5.02875
ENSRNOG00000018944	-1.71818	6.87776	-7.86181	4.62027e-05	0.000920333	2.19343	Pank1	1	pantothenate kinase 1	ENSG00000152782	PANK1	1	53354	6.03509	7.72043
ENSRNOG00000009715	-1.81559	6.97027	-7.85766	4.63797e-05	0.000920333	2.19195	Me1	8	malic enzyme 1	ENSG00000065833	ME1	1	4199	6.10339	7.83715
ENSRNOG00000033984	1.93866	2.51151	7.85044	4.66899e-05	0.000921272	2.59212	Ifnlr1	5	interferon, lambda receptor 1	ENSG00000185436	IFNLR1	1	163702	3.48982	1.53319
ENSRNOG00000012876	-3.01795	5.32181	-7.84721	4.68295e-05	0.000922526	2.3767	Slc6a13	4	solute carrier family 6 member 13	ENSG00000010379	SLC6A13	1	6540	3.89015	6.75346
ENSRNOG00000052499	1.20014	3.65933	7.84326	4.70007e-05	0.000924397	2.43922	Rab27a	8	RAB27A, member RAS oncogene family	ENSG00000069974	RAB27A	1	5873	4.23697	3.0817
ENSRNOG00000033796	1.64987	3.85898	7.83463	4.73774e-05	0.000929167	2.40526	Kcnj5	8	potassium voltage-gated channel subfamily J member 5	ENSG00000120457	KCNJ5	1	3762	4.68357	3.03439
ENSRNOG00000014288	2.25539	7.35364	7.83419	4.73963e-05	0.000929167	2.22148	Fn1	9	fibronectin 1	ENSG00000115414	FN1	1	2335	8.42403	6.28325
ENSRNOG00000024650	3.18951	0.414336	7.83142	4.75182e-05	0.000930053	2.41681	Ckap2	16	cytoskeleton associated protein 2	ENSG00000136108	CKAP2	1	26586	2.13557	-1.3069
ENSRNOG00000010076	2.36884	1.17164	7.82737	4.76967e-05	0.000930546	2.53439	Pkp1	13	plakophilin 1	ENSG00000081277	PKP1	1	5317	2.34263	0.000659402
ENSRNOG00000018441	2.33096	1.02948	7.82888	4.76298e-05	0.000930546	2.52136	Ggt7	3	gamma-glutamyltransferase 7	ENSG00000131067	GGT7	1	2686	2.16013	-0.101167
ENSRNOG00000021579	-1.55689	6.13137	-7.82022	4.80136e-05	0.000935224	2.16831	Mpp6	4	membrane palmitoylated protein 6	ENSG00000105926	MPP6	1	51678	5.38543	6.87731
ENSRNOG00000011973	2.35998	1.51783	7.81156	4.84003e-05	0.000941246	2.56223	Il7	2	interleukin 7	ENSG00000104432	IL7	1	3574	2.70961	0.326048
ENSRNOG00000013948	0.781842	5.65897	7.80864	4.85315e-05	0.000942287	2.13328	Zc3hav1	4	zinc finger CCCH-type containing, antiviral 1	ENSG00000105939	ZC3HAV1	1	56829	6.06658	5.25136
ENSRNOG00000017597	-2.59241	8.86296	-7.80568	4.86651e-05	0.000942832	2.2404	Fbp1	17	fructose-bisphosphatase 1	ENSG00000165140	FBP1	1	2203	7.53139	10.1945
ENSRNOG00000006019	-1.34661	5.97543	-7.80286	4.87926e-05	0.000942832	2.15158	G0s2	13	G0/G1switch 2	ENSG00000123689	G0S2	1	50486	5.30326	6.64761
ENSRNOG00000060753	1.19794	5.94687	7.80302	4.87854e-05	0.000942832	2.12446	Esyt1	7	extended synaptotagmin 1	ENSG00000139641	ESYT1	1	23344	6.51895	5.37479
ENSRNOG00000025406	-1.63381	5.7347	-7.79853	4.89889e-05	0.000943619	2.1752	Iqgap2	2	IQ motif containing GTPase activating protein 2	ENSG00000145703	IQGAP2	1	10788	4.9834	6.48599
ENSRNOG00000040120	-2.85184	7.79371	-7.79929	4.89544e-05	0.000943619	2.17135	Bhmt2	2	betaine-homocysteine S-methyltransferase 2	ENSG00000132840	BHMT2	1	23743	6.3976	9.18982
ENSRNOG00000017133	-1.95088	8.37847	-7.79509	4.91458e-05	0.000945142	2.19621	LOC306766	17	hypothetical LOC306766	ENSG00000122203	KIAA1191	1	57179	7.40497	9.35196
ENSRNOG00000016525	-2.22383	4.6505	-7.79328	4.92284e-05	0.000945231	2.35453	Susd3	17	sushi domain containing 3	ENSG00000157303	SUSD3	1	203328	3.51491	5.7861
ENSRNOG00000055314	-1.5414	7.57193	-7.7894	4.9406e-05	0.000945865	2.14113	Msrb1	10	methionine sulfoxide reductase B1	ENSG00000198736	MSRB1	1	51734	6.76644	8.37742
ENSRNOG00000060179	0.928868	6.05628	7.78916	4.94173e-05	0.000945865	2.10291	Gpc3	X	glypican 3	ENSG00000147257	GPC3	1	2719	6.49412	5.61845
ENSRNOG00000021682	0.957617	4.77806	7.78427	4.96426e-05	0.000948682	2.2029	Dcakd	10	dephospho-CoA kinase domain containing	ENSG00000172992	DCAKD	1	79877	5.28835	4.26777
ENSRNOG00000003328	-1.01008	5.79393	-7.77784	4.994e-05	0.000952864	2.124	Cdip1	10	cell death-inducing p53 target 1	ENSG00000089486	CDIP1	1	29965	5.30073	6.28713
ENSRNOG00000061147	2.10031	2.42185	7.77149	5.02363e-05	0.000956936	2.52968	Fam189a2	1	family with sequence similarity 189, member A2	ENSG00000135063	FAM189A2	1	9413	3.35642	1.48728
ENSRNOG00000004302	-2.2719	8.82284	-7.76933	5.03372e-05	0.000956936	2.20285	Pah	7	phenylalanine hydroxylase	ENSG00000171759	PAH	1	5053	7.65217	9.99351
ENSRNOG00000008895	-1.98717	8.80174	-7.76821	5.03899e-05	0.000956936	2.19672	Hnf4a	3	hepatocyte nuclear factor 4, alpha	ENSG00000101076	HNF4A	1	3172	7.8147	9.78878
ENSRNOG00000002456	-3.59301	1.74455	-7.76484	5.05483e-05	0.000958444	2.38746	Hlf	10	HLF, PAR bZIP transcription factor	ENSG00000108924	HLF	1	3131	0.072382	3.41672
ENSRNOG00000059834	-1.60178	3.90379	-7.75719	5.09099e-05	0.000958517	2.40374	Cib2	8	calcium and integrin binding family member 2	ENSG00000136425	CIB2	1	10518	3.14399	4.66359
ENSRNOG00000008526	-2.31123	4.41087	-7.75647	5.09442e-05	0.000958517	2.37538	Pdzd3	8	PDZ domain containing 3	ENSG00000172367	PDZD3	1	79849	3.33272	5.48902
ENSRNOG00000051235	3.2944	4.17919	7.75474	5.10261e-05	0.000958517	2.34428	C2	20	complement C2	ENSG00000166278	C2	1	717	5.689	2.66939
ENSRNOG00000002695	-1.02465	5.3682	-7.76298	5.06359e-05	0.000958517	2.15089	Tfb2m	13	transcription factor B2, mitochondrial	ENSG00000162851	TFB2M	1	64216	4.87884	5.85756
ENSRNOG00000017669	-1.83217	6.73972	-7.75477	5.10249e-05	0.000958517	2.08997	Chd1l	2	chromodomain helicase DNA binding protein 1-like	ENSG00000131778	CHD1L	1	9557	5.88474	7.5947
ENSRNOG00000021151	1.03011	6.19847	7.75543	5.09936e-05	0.000958517	2.0693	Ppp1r14b	1	protein phosphatase 1, regulatory (inhibitor) subunit 14B	ENSG00000173457	PPP1R14B	1	26472	6.66826	5.72868
ENSRNOG00000015020	-1.14727	8.27737	-7.74685	5.14035e-05	0.000963943	2.14581	Idh1	9	isocitrate dehydrogenase (NADP(+)) 1, cytosolic	ENSG00000138413	IDH1	1	3417	7.7414	8.81334
ENSRNOG00000001183	-1.41203	5.43467	-7.74538	5.14738e-05	0.000963943	2.14461	Hnf1a	12	HNF1 homeobox A	ENSG00000135100	HNF1A	1	6927	4.74334	6.126
ENSRNOG00000016397	-1.56901	3.88524	-7.73845	5.18082e-05	0.000965216	2.38436	Tmprss13	8	transmembrane protease, serine 13	ENSG00000137747	TMPRSS13	1	84000	3.14357	4.62691
ENSRNOG00000005930	3.65941	0.312591	7.73738	5.186e-05	0.000965216	2.27094	Nnmt	8	nicotinamide N-methyltransferase	ENSG00000166741	NNMT	1	4837	1.97388	-1.3487
ENSRNOG00000016760	4.65832	-0.846818	7.73772	5.18432e-05	0.000965216	2.11602	Kctd19	19	potassium channel tetramerization domain containing 19	ENSG00000168676	KCTD19	1	146212	1.31497	-3.00861
ENSRNOG00000019978	-0.892414	5.81671	-7.74124	5.16734e-05	0.000965216	2.07792	Parg	16	poly (ADP-ribose) glycohydrolase	ENSG00000227345	PARG	1	8505	5.40086	6.23256
ENSRNOG00000018715	2.82625	2.68109	7.73252	5.20961e-05	0.000965633	2.47678	Clec10a	10	C-type lectin domain family 10, member A	ENSG00000132514	CLEC10A	1	10462	4.0215	1.34067
ENSRNOG00000054274	2.88067	3.30063	7.72672	5.23793e-05	0.000965633	2.41932	Cacnb3	7	calcium voltage-gated channel auxiliary subunit beta 3	ENSG00000167535	CACNB3	1	784	4.68459	1.91666
ENSRNOG00000010986	1.29479	3.75489	7.72625	5.24022e-05	0.000965633	2.30737	Cmtm7	8	CKLF-like MARVEL transmembrane domain containing 7	ENSG00000153551	CMTM7	1	112616	4.37219	3.13759
ENSRNOG00000012502	1.26162	4.67988	7.72549	5.24394e-05	0.000965633	2.16385	Stk17b	9	serine/threonine kinase 17b	ENSG00000081320	STK17B	1	9262	5.28	4.07976
ENSRNOG00000011260	-2.24107	6.78276	-7.7261	5.24096e-05	0.000965633	2.07499	Cmbl	2	carboxymethylenebutenolidase homolog	ENSG00000164237	CMBL	1	134147	5.66012	7.9054
ENSRNOG00000021338	0.992053	6.10818	7.73515	5.1968e-05	0.000965633	2.04842	Tmem132a	1	transmembrane protein 132A	ENSG00000006118	TMEM132A	1	54972	6.58869	5.62768
ENSRNOG00000017265	-0.862514	6.44957	-7.7261	5.24096e-05	0.000965633	2.03677	Tmem131	9	transmembrane protein 131	ENSG00000075568	TMEM131	1	23505	6.04638	6.85275
ENSRNOG00000000528	1.9292	2.82589	7.71481	5.29664e-05	0.000972228	2.43722	Fgd2	20	FYVE, RhoGEF and PH domain containing 2	ENSG00000146192	FGD2	1	221472	3.73329	1.91849
ENSRNOG00000019356	1.69128	3.38877	7.71176	5.31175e-05	0.000972228	2.36985	Lrfn4	1	leucine rich repeat and fibronectin type III domain containing 4	ENSG00000173621	LRFN4	1	78999	4.16932	2.60823
ENSRNOG00000008474	-1.08003	5.28134	-7.71015	5.31981e-05	0.000972228	2.11446	Acox3	14	acyl-CoA oxidase 3, pristanoyl	ENSG00000087008	ACOX3	1	8310	4.74109	5.82158
ENSRNOG00000016519	-1.69964	5.66247	-7.71081	5.31649e-05	0.000972228	2.10507	Kdm1b	17	lysine demethylase 1B	ENSG00000165097	KDM1B	1	221656	4.88637	6.43858
ENSRNOG00000049057	-1.05344	6.16428	-7.71586	5.2914e-05	0.000972228	2.03857	Znrf2	4	zinc and ring finger 2	ENSG00000180233	ZNRF2	1	223082	5.6833	6.64526
ENSRNOG00000012660	5.70785	2.05193	7.69341	5.40395e-05	0.000974394	2.42459	Postn	2	periostin	ENSG00000133110	POSTN	1	10631	4.71463	-0.610771
ENSRNOG00000047933	-1.62969	3.31691	-7.69699	5.38583e-05	0.000974394	2.41991	Phykpl	10	5-phosphohydroxy-L-lysine phospho-lyase	ENSG00000175309	PHYKPL	1	85007	2.49706	4.13677
ENSRNOG00000008182	2.95534	3.64622	7.69183	5.41196e-05	0.000974394	2.34201	Htra3	14	HtrA serine peptidase 3	ENSG00000170801	HTRA3	1	94031	5.01688	2.27556
ENSRNOG00000008425	1.32647	3.53885	7.7	5.37065e-05	0.000974394	2.31366	Nav1	13	neuron navigator 1	ENSG00000134369	NAV1	1	89796	4.22324	2.85446
ENSRNOG00000015394	1.74682	4.51346	7.70437	5.34867e-05	0.000974394	2.16323	Trpv5	4	transient receptor potential cation channel, subfamily V, member 5	ENSG00000127412	TRPV5	1	56302	5.38221	3.64471
ENSRNOG00000002636	-2.47278	6.05947	-7.69671	5.38726e-05	0.000974394	2.09469	Abat	10	4-aminobutyrate aminotransferase	ENSG00000183044	ABAT	1	18	4.84132	7.27762
ENSRNOG00000012786	-1.17861	8.14069	-7.70379	5.35157e-05	0.000974394	2.09029	Pgrmc1	X	progesterone receptor membrane component 1	ENSG00000101856	PGRMC1	1	10857	7.53036	8.75102
ENSRNOG00000019311	1.37952	5.46398	7.6968	5.3868e-05	0.000974394	2.04891	Nfkb2	1	nuclear factor kappa B subunit 2	ENSG00000077150	NFKB2	1	4791	6.09028	4.83767
ENSRNOG00000030225	-1.2115	6.89508	-7.69245	5.40883e-05	0.000974394	2.01371	Clpx	8	caseinolytic mitochondrial matrix peptidase chaperone subunit	ENSG00000166855	CLPX	1	10845	6.30812	7.48204
ENSRNOG00000055089	1.04309	6.40198	7.69343	5.40385e-05	0.000974394	2.00873	Slc44a1	5	solute carrier family 44 member 1	ENSG00000070214	SLC44A1	1	23446	6.94219	5.86178
ENSRNOG00000020345	-1.74823	4.75938	-7.68691	5.43704e-05	0.000976013	2.19932	Slc25a42	16	solute carrier family 25, member 42	ENSG00000181035	SLC25A42	1	284439	3.96593	5.55283
ENSRNOG00000036693	-1.16227	7.83007	-7.68804	5.43124e-05	0.000976013	2.05562	Slc25a10	10	solute carrier family 25 member 10	ENSG00000262660	AC139530.2	1	NA	7.25451	8.40564
ENSRNOG00000036693	-1.16227	7.83007	-7.68804	5.43124e-05	0.000976013	2.05562	Slc25a10	10	solute carrier family 25 member 10	ENSG00000183048	SLC25A10	0	1468	7.25451	8.40564
ENSRNOG00000018752	1.86634	3.50733	7.68391	5.45237e-05	0.000977319	2.32203	Clcf1	1	cardiotrophin-like cytokine factor 1	ENSG00000175505	CLCF1	1	23529	4.537	2.47766
ENSRNOG00000002052	1.79133	6.80443	7.67999	5.47247e-05	0.000979475	2.02951	Ccdc80	11	coiled-coil domain containing 80	ENSG00000091986	CCDC80	1	151887	7.6519	5.95696
ENSRNOG00000022975	2.59535	2.70143	7.67835	5.48091e-05	0.000979542	2.42684	Nfam1	7	NFAT activating protein with ITAM motif 1	ENSG00000235568	NFAM1	1	150372	3.86042	1.54243
ENSRNOG00000012918	-0.967522	6.46403	-7.6601	5.57581e-05	0.000995037	1.97205	Mtmr6	15	myotubularin related protein 6	ENSG00000139505	MTMR6	1	9107	6.01764	6.91043
ENSRNOG00000007726	1.28357	5.3356	7.65464	5.60459e-05	0.000998704	2.01194	Mcam	8	melanoma cell adhesion molecule	ENSG00000076706	MCAM	1	4162	5.95226	4.71894
ENSRNOG00000007939	-1.2934	7.64732	-7.65207	5.61814e-05	0.00099965	2.00808	Naprt	7	nicotinate phosphoribosyltransferase	ENSG00000147813	NAPRT	1	93100	6.97355	8.32109
ENSRNOG00000002946	3.73323	2.04143	7.6388	5.68891e-05	0.00100488	2.41718	Socs3	10	suppressor of cytokine signaling 3	ENSG00000184557	SOCS3	1	9021	3.91806	0.164801
ENSRNOG00000000811	3.18457	0.754156	7.64133	5.67534e-05	0.00100488	2.33338	Pkib	20	cAMP-dependent protein kinase inhibitor beta	ENSG00000135549	PKIB	1	5570	2.39318	-0.884866
ENSRNOG00000009068	1.90564	4.55103	7.63981	5.68347e-05	0.00100488	2.12041	Phlda3	13	pleckstrin homology-like domain, family A, member 3	ENSG00000174307	PHLDA3	1	23612	5.37821	3.72384
ENSRNOG00000032152	-1.09182	7.70336	-7.6394	5.68568e-05	0.00100488	1.99738	Rab11fip3	10	RAB11 family interacting protein 3	ENSG00000090565	RAB11FIP3	1	9727	7.14527	8.26145
ENSRNOG00000011104	0.835034	6.95485	7.64217	5.67086e-05	0.00100488	1.97349	Rpl22	5	ribosomal protein L22	ENSG00000116251	RPL22	1	6146	7.34425	6.56546
ENSRNOG00000002991	-1.15385	4.05478	-7.63431	5.71305e-05	0.00100767	2.23107	Srr	10	serine racemase	ENSG00000167720	SRR	1	63826	3.50221	4.60735
ENSRNOG00000038035	3.04274	0.519463	7.63274	5.72156e-05	0.00100771	2.25775	Kif4a	X	kinesin family member 4A	ENSG00000090889	KIF4A	1	24137	1.93876	-0.899838
ENSRNOG00000008736	2.68304	1.83127	7.61861	5.79846e-05	0.00100953	2.39725	Slamf8	13	SLAM family member 8	ENSG00000158714	SLAMF8	1	56833	3.02579	0.636751
ENSRNOG00000029662	2.68838	2.45983	7.61911	5.7957e-05	0.00100953	2.38649	Wdfy4	16	WDFY family member 4	ENSG00000128815	WDFY4	1	57705	3.78118	1.13849
ENSRNOG00000010665	4.8742	-0.842701	7.62307	5.77406e-05	0.00100953	2.05353	Ccr7	10	C-C motif chemokine receptor 7	ENSG00000126353	CCR7	1	1236	1.33231	-3.01772
ENSRNOG00000010798	4.33363	-1.0984	7.62542	5.76123e-05	0.00100953	2.02387	Blk	15	BLK proto-oncogene, Src family tyrosine kinase	ENSG00000136573	BLK	1	640	1.21851	-3.41532
ENSRNOG00000001159	-3.43862	7.5563	-7.62453	5.76611e-05	0.00100953	2.00482	Tff3	20	trefoil factor 3	ENSG00000160180	TFF3	1	7033	5.84071	9.27189
ENSRNOG00000018662	-2.71861	7.00716	-7.61863	5.79833e-05	0.00100953	1.97861	Amacr	2	alpha-methylacyl-CoA racemase	ENSG00000242110	AMACR	1	23600	5.66522	8.3491
ENSRNOG00000049641	-1.75956	6.28731	-7.62678	5.75382e-05	0.00100953	1.97403	Rab29	13	RAB29, member RAS oncogene family	ENSG00000117280	RAB29	1	8934	5.44351	7.13112
ENSRNOG00000028746	-1.16503	6.82435	-7.62907	5.74138e-05	0.00100953	1.94698	Gsto1	1	glutathione S-transferase omega 1	ENSG00000148834	GSTO1	1	9446	6.25328	7.39542
ENSRNOG00000019639	-1.34815	7.77926	-7.61401	5.82376e-05	0.00101103	1.97651	Pgpep1	16	pyroglutamyl-peptidase I	ENSG00000130517	PGPEP1	1	54858	7.11754	8.44098
ENSRNOG00000019937	0.982968	6.07425	7.61452	5.8209e-05	0.00101103	1.92586	Kcnk1	19	potassium two pore domain channel subfamily K member 1	ENSG00000135750	KCNK1	1	3775	6.517	5.6315
ENSRNOG00000020431	3.60217	1.50793	7.60897	5.85156e-05	0.001013	2.37006	Matk	7	megakaryocyte-associated tyrosine kinase	ENSG00000007264	MATK	1	4145	3.26789	-0.252027
ENSRNOG00000009687	1.04925	4.08569	7.60577	5.86933e-05	0.001013	2.12964	Ccdc120	X	coiled-coil domain containing 120	ENSG00000147144	CCDC120	1	90060	4.62458	3.54679
ENSRNOG00000046007	1.13387	4.39911	7.60442	5.87681e-05	0.001013	2.08068	Cldn3	12	claudin 3	ENSG00000165215	CLDN3	1	1365	4.95833	3.83988
ENSRNOG00000012458	-3.14465	6.94945	-7.60787	5.85765e-05	0.001013	1.98588	Cyp2e1	1	cytochrome P450, family 2, subfamily e, polypeptide 1	ENSG00000130649	CYP2E1	1	1571	5.33738	8.56152
ENSRNOG00000010023	-1.06305	5.94019	-7.60615	5.86722e-05	0.001013	1.94148	Slc33a1	2	solute carrier family 33 member 1	ENSG00000169359	SLC33A1	1	9197	5.42064	6.45975
ENSRNOG00000020465	1.81464	2.99035	7.60057	5.89831e-05	0.00101526	2.30052	Ripk3	15	receptor-interacting serine-threonine kinase 3	ENSG00000129465	RIPK3	1	11035	3.89562	2.08507
ENSRNOG00000027936	1.24762	3.6872	7.59193	5.94678e-05	0.00101927	2.18764	Ccdc8	1	coiled-coil domain containing 8	ENSG00000169515	CCDC8	1	83987	4.35159	3.02281
ENSRNOG00000037871	-1.15226	4.39943	-7.59204	5.9462e-05	0.00101927	2.12666	Sfxn5	4	sideroflexin 5	ENSG00000144040	SFXN5	1	94097	3.85602	4.94284
ENSRNOG00000012053	0.95038	5.55254	7.59344	5.9383e-05	0.00101927	1.92651	S100a16	2	S100 calcium binding protein A16	ENSG00000188643	S100A16	1	140576	5.98449	5.12059
ENSRNOG00000038202	-1.18342	6.65692	-7.59002	5.95756e-05	0.00101968	1.90506	Calml4	8	calmodulin-like 4	ENSG00000129007	CALML4	1	91860	6.01139	7.30246
ENSRNOG00000003772	-1.28206	6.8984	-7.58805	5.96875e-05	0.00102015	1.90826	Csrp2	7	cysteine and glycine-rich protein 2	ENSG00000175183	CSRP2	1	1466	6.23625	7.56055
ENSRNOG00000008941	1.16039	6.39819	7.58578	5.98158e-05	0.00102091	1.90225	Ets1	8	ETS proto-oncogene 1, transcription factor	ENSG00000134954	ETS1	1	2113	6.97813	5.81824
ENSRNOG00000019675	2.35704	2.45201	7.56013	6.12917e-05	0.00103357	2.32551	Pycard	1	PYD and CARD domain containing	ENSG00000103490	PYCARD	1	29108	3.55699	1.34703
ENSRNOG00000020792	2.64893	0.592569	7.56609	6.09452e-05	0.00103357	2.2436	Etv4	10	ets variant 4	ENSG00000175832	ETV4	1	2118	2.00305	-0.817913
ENSRNOG00000001431	1.53382	3.66274	7.56364	6.10874e-05	0.00103357	2.1685	Rasa4	12	RAS p21 protein activator 4	ENSG00000105808	RASA4	1	10156	4.44536	2.88011
ENSRNOG00000001431	1.53382	3.66274	7.56364	6.10874e-05	0.00103357	2.1685	Rasa4	12	RAS p21 protein activator 4	ENSG00000105808	RASA4	1	102724229	4.44536	2.88011
ENSRNOG00000001431	1.53382	3.66274	7.56364	6.10874e-05	0.00103357	2.1685	Rasa4	12	RAS p21 protein activator 4	ENSG00000170667	RASA4B	1	100271927	4.44536	2.88011
ENSRNOG00000001431	1.53382	3.66274	7.56364	6.10874e-05	0.00103357	2.1685	Rasa4	12	RAS p21 protein activator 4	ENSG00000270249	AC093668.1	0	NA	4.44536	2.88011
ENSRNOG00000039754	6.8451	0.442033	7.55174	6.1783e-05	0.00103357	2.14342	Rab7b	13	Rab7b, member RAS oncogene family	ENSG00000276600	RAB7B	1	338382	3.64701	-2.76294
ENSRNOG00000006116	1.75974	3.92955	7.5494	6.19205e-05	0.00103357	2.10678	Hk2	4	hexokinase 2	ENSG00000159399	HK2	1	3099	4.85052	3.00858
ENSRNOG00000002548	6.45541	-0.810243	7.55199	6.17683e-05	0.00103357	2.0921	Tnn	13	tenascin N	ENSG00000120332	TNN	1	63923	2.32028	-3.94076
ENSRNOG00000026128	1.43392	4.03346	7.55392	6.16546e-05	0.00103357	2.09126	Cpne8	7	copine 8	ENSG00000139117	CPNE8	1	144402	4.74852	3.31841
ENSRNOG00000012027	3.65829	0.0140617	7.55032	6.18666e-05	0.00103357	2.07103	Bco1	19	beta-carotene oxygenase 1	ENSG00000135697	BCO1	1	53630	1.73776	-1.70964
ENSRNOG00000016535	5.44568	-0.875073	7.55765	6.14364e-05	0.00103357	2.04816	Ccl22	19	C-C motif chemokine ligand 22	ENSG00000102962	CCL22	1	6367	1.66558	-3.41573
ENSRNOG00000011419	-2.20527	9.46079	-7.5522	6.17555e-05	0.00103357	2.02512	Aldh6a1	6	aldehyde dehydrogenase 6 family, member A1	ENSG00000119711	ALDH6A1	1	4329	8.37474	10.5468
ENSRNOG00000050645	-1.15992	4.95615	-7.56647	6.09229e-05	0.00103357	2.01032	LOC103690067	4	EKC/KEOPS complex subunit Tprkb	ENSG00000144034	TPRKB	1	51002	4.38979	5.52252
ENSRNOG00000003897	4.04602	6.62718	7.56472	6.10246e-05	0.00103357	1.99964	Col1a1	10	collagen type I alpha 1 chain	ENSG00000108821	COL1A1	1	1277	8.43949	4.81486
ENSRNOG00000017072	-1.17622	5.66402	-7.55362	6.16724e-05	0.00103357	1.91238	Slc16a14	9	solute carrier family 16, member 14	ENSG00000163053	SLC16A14	1	151473	5.06634	6.26169
ENSRNOG00000027797	-1.27791	7.42228	-7.56935	6.07564e-05	0.00103357	1.90861	Nit2	11	nitrilase family, member 2	ENSG00000114021	NIT2	1	56954	6.81758	8.02699
ENSRNOG00000010922	-1.03648	7.19096	-7.55268	6.17277e-05	0.00103357	1.87997	Ppp2r1b	8	protein phosphatase 2 scaffold subunit A beta	ENSG00000137713	PPP2R1B	1	5519	6.69544	7.68648
ENSRNOG00000005249	-0.846354	6.42399	-7.56568	6.09686e-05	0.00103357	1.87278	Snx6	6	sorting nexin 6	ENSG00000129515	SNX6	1	58533	6.01792	6.83006
ENSRNOG00000005659	3.83579	0.598972	7.54718	6.20515e-05	0.00103433	2.17834	Aurkb	10	aurora kinase B	ENSG00000178999	AURKB	1	9212	2.42608	-1.22814
ENSRNOG00000005965	1.17586	3.85677	7.53914	6.2529e-05	0.00103518	2.10235	Irak4	7	interleukin-1 receptor-associated kinase 4	ENSG00000198001	IRAK4	1	51135	4.44037	3.27316
ENSRNOG00000011451	-1.17788	4.78591	-7.54335	6.22788e-05	0.00103518	2.02018	Lrp3	1	LDL receptor related protein 3	ENSG00000130881	LRP3	1	4037	4.18682	5.385
ENSRNOG00000003307	-1.81374	8.41292	-7.54146	6.23909e-05	0.00103518	1.94223	Gcdh	19	glutaryl-CoA dehydrogenase	ENSG00000105607	GCDH	1	2639	7.49373	9.33211
ENSRNOG00000047115	-1.12219	5.3328	-7.54443	6.22146e-05	0.00103518	1.93898	Cox16	6	COX16, cytochrome c oxidase assembly homolog	ENSG00000133983	COX16	1	51241	4.77919	5.88642
ENSRNOG00000005868	-1.69158	5.96703	-7.54027	6.24618e-05	0.00103518	1.89975	Ttc21b	3	tetratricopeptide repeat domain 21B	ENSG00000123607	TTC21B	1	79809	5.21451	6.71954
ENSRNOG00000019534	-0.772179	7.53753	-7.53696	6.26588e-05	0.00103592	1.88421	Ap2a2	1	adaptor-related protein complex 2, alpha 2 subunit	ENSG00000183020	AP2A2	1	161	7.14401	7.93105
ENSRNOG00000010165	1.07066	5.48015	7.52373	6.3455e-05	0.00104766	1.8629	Tnfaip2	6	TNF alpha induced protein 2	ENSG00000185215	TNFAIP2	1	7127	5.98353	4.97677
ENSRNOG00000017869	2.04298	4.4391	7.5214	6.35966e-05	0.00104857	2.0166	Irf8	19	interferon regulatory factor 8	ENSG00000140968	IRF8	1	3394	5.42076	3.45745
ENSRNOG00000053239	2.63719	3.15231	7.51456	6.40132e-05	0.00105115	2.21877	Clmp	8	CXADR-like membrane protein	ENSG00000166250	CLMP	1	79827	4.37457	1.93004
ENSRNOG00000013791	-1.08814	5.33544	-7.51472	6.40039e-05	0.00105115	1.90073	Enpp3	1	ectonucleotide pyrophosphatase/phosphodiesterase 3	ENSG00000154269	ENPP3	1	5169	4.76939	5.90149
ENSRNOG00000015206	-1.26182	6.04441	-7.51526	6.39708e-05	0.00105115	1.84706	Alad	5	aminolevulinate dehydratase	ENSG00000148218	ALAD	1	210	5.39173	6.69709
ENSRNOG00000013231	1.6082	4.01427	7.5112	6.42196e-05	0.00105169	2.05288	Ptafr	5	platelet-activating factor receptor	ENSG00000169403	PTAFR	1	5724	4.78755	3.24098
ENSRNOG00000012216	-1.30485	5.88909	-7.51206	6.41663e-05	0.00105169	1.8598	Tgfbi	17	transforming growth factor, beta induced	ENSG00000120708	TGFBI	1	7045	5.24677	6.53141
ENSRNOG00000055221	-1.55803	5.62016	-7.50952	6.43228e-05	0.00105196	1.89166	Acot1	6	acyl-CoA thioesterase 1	ENSG00000184227	ACOT1	1	641371	4.85764	6.38268
ENSRNOG00000055221	-1.55803	5.62016	-7.50952	6.43228e-05	0.00105196	1.89166	Acot1	6	acyl-CoA thioesterase 1	ENSG00000119673	ACOT2	1	10965	4.85764	6.38268
ENSRNOG00000021644	1.63765	3.66977	7.50457	6.4628e-05	0.00105462	2.10335	Slc15a3	1	solute carrier family 15 member 3	ENSG00000110446	SLC15A3	1	51296	4.44789	2.89165
ENSRNOG00000006508	-1.9462	7.43082	-7.50407	6.46589e-05	0.00105462	1.84566	Thnsl2	4	threonine synthase-like 2	ENSG00000144115	THNSL2	1	55258	6.4619	8.39973
ENSRNOG00000058805	1.03869	4.84075	7.50195	6.479e-05	0.00105534	1.90685	Aida	13	axin interactor, dorsalization associated	ENSG00000186063	AIDA	1	64853	5.32064	4.36086
ENSRNOG00000012109	2.24985	2.78928	7.49893	6.49778e-05	0.00105698	2.23494	Fam105a	2	family with sequence similarity 105, member A	ENSG00000145569	OTULINL	1	54491	3.94826	1.6303
ENSRNOG00000020083	-1.31217	7.57616	-7.49744	6.50703e-05	0.00105706	1.8436	Scly	9	selenocysteine lyase	ENSG00000132330	SCLY	1	51540	6.93528	8.21705
ENSRNOG00000011648	-1.54893	10.4565	-7.48975	6.55515e-05	0.00106204	2.03062	Aqp1	4	aquaporin 1	ENSG00000240583	AQP1	1	358	9.64939	11.2635
ENSRNOG00000011648	-1.54893	10.4565	-7.48975	6.55515e-05	0.00106204	2.03062	Aqp1	4	aquaporin 1	ENSG00000250424	AC004691.2	1	NA	9.64939	11.2635
ENSRNOG00000016217	-2.41436	6.97461	-7.49073	6.549e-05	0.00106204	1.83734	Gtpbp4	17	GTP binding protein 4	ENSG00000107937	GTPBP4	1	23560	5.78804	8.16118
ENSRNOG00000039390	2.32816	2.24627	7.48689	6.57317e-05	0.00106217	2.26553	Slc37a2	8	solute carrier family 37 member 2	ENSG00000134955	SLC37A2	1	219855	3.36771	1.12484
ENSRNOG00000027552	1.76227	4.16042	7.48684	6.57347e-05	0.00106217	2.00805	Tapbpl	4	TAP binding protein-like	ENSG00000139192	TAPBPL	1	55080	5.02534	3.29551
ENSRNOG00000008047	-2.60452	8.0466	-7.47755	6.63228e-05	0.00107025	1.85201	Khk	6	ketohexokinase	ENSG00000138030	KHK	1	3795	6.75821	9.33498
ENSRNOG00000019643	1.18268	4.05201	7.47277	6.6628e-05	0.00107375	1.99593	Pcyox1l	18	prenylcysteine oxidase 1 like	ENSG00000145882	PCYOX1L	1	78991	4.67562	3.42841
ENSRNOG00000011459	1.38279	3.82261	7.4653	6.71073e-05	0.00107647	2.04207	Rhbdf2	10	rhomboid 5 homolog 2	ENSG00000129667	RHBDF2	1	79651	4.5054	3.13982
ENSRNOG00000053577	-2.44611	4.7931	-7.4603	6.74308e-05	0.00107647	2.01776	Gramd1b	8	GRAM domain containing 1B	ENSG00000023171	GRAMD1B	1	57476	3.71255	5.87366
ENSRNOG00000017209	5.1986	-0.797122	7.46147	6.73548e-05	0.00107647	1.96632	Tubb3	19	tubulin, beta 3 class III	ENSG00000258947	TUBB3	1	10381	1.57991	-3.17415
ENSRNOG00000017209	5.1986	-0.797122	7.46147	6.73548e-05	0.00107647	1.96632	Tubb3	19	tubulin, beta 3 class III	ENSG00000198211	AC092143.1	1	NA	1.57991	-3.17415
ENSRNOG00000002898	-1.25719	4.78466	-7.4662	6.70492e-05	0.00107647	1.93992	Nme7	13	NME/NM23 family member 7	ENSG00000143156	NME7	1	29922	4.20331	5.36601
ENSRNOG00000020822	1.4799	4.54228	7.46382	6.72028e-05	0.00107647	1.91558	Atp8b2	2	ATPase phospholipid transporting 8B2	ENSG00000143515	ATP8B2	1	57198	5.24083	3.84372
ENSRNOG00000001640	-0.96953	4.98586	-7.45817	6.75688e-05	0.00107647	1.89107	Tomm70	11	translocase of outer mitochondrial membrane 70	ENSG00000154174	TOMM70	1	9868	4.49749	5.47424
ENSRNOG00000010451	-1.94662	5.35928	-7.45939	6.74898e-05	0.00107647	1.88558	Slc34a3	3	solute carrier family 34 member 3	ENSG00000198569	SLC34A3	1	142680	4.30528	6.41328
ENSRNOG00000010947	1.61742	5.56677	7.45776	6.75955e-05	0.00107647	1.79931	Mmp14	15	matrix metallopeptidase 14	ENSG00000157227	MMP14	1	4323	6.32813	4.8054
ENSRNOG00000058271	-1.9783	7.10945	-7.46516	6.71167e-05	0.00107647	1.79686	Chpt1	7	choline phosphotransferase 1	ENSG00000111666	CHPT1	1	56994	6.13368	8.08523
ENSRNOG00000053450	1.33575	5.66397	7.45511	6.7768e-05	0.0010778	1.78134	Myadm	1	myeloid-associated differentiation marker	ENSG00000179820	MYADM	1	91663	6.31723	5.0107
ENSRNOG00000037302	2.95974	0.705416	7.44348	6.85307e-05	0.0010868	2.13541	Rad51	3	RAD51 recombinase	ENSG00000051180	RAD51	1	5888	2.02704	-0.616207
ENSRNOG00000009334	4.50099	-0.505129	7.44239	6.86025e-05	0.0010868	1.96813	Knstrn	3	kinetochore-localized astrin/SPAG5 binding protein	ENSG00000128944	KNSTRN	1	90417	1.88093	-2.89119
ENSRNOG00000000981	2.24531	4.3325	7.44466	6.84528e-05	0.0010868	1.95598	Scarb1	12	scavenger receptor class B, member 1	ENSG00000073060	SCARB1	1	949	5.35024	3.31477
ENSRNOG00000000457	1.46349	4.74838	7.43714	6.89502e-05	0.00109089	1.85485	Tap1	20	transporter 1, ATP binding cassette subfamily B member	ENSG00000168394	TAP1	1	6890	5.47601	4.02076
ENSRNOG00000024264	2.81815	0.94019	7.43289	6.92332e-05	0.00109394	2.17817	Amz1	12	archaelysin family metallopeptidase 1	ENSG00000174945	AMZ1	1	155185	2.2968	-0.416416
ENSRNOG00000020032	1.58133	3.58321	7.42736	6.96032e-05	0.00109571	2.04644	Impdh1	4	inosine monophosphate dehydrogenase 1	ENSG00000106348	IMPDH1	1	3614	4.29047	2.87594
ENSRNOG00000012534	1.11224	4.02051	7.42717	6.96164e-05	0.00109571	1.96246	Mfsd10	14	major facilitator superfamily domain containing 10	ENSG00000109736	MFSD10	1	10227	4.54731	3.4937
ENSRNOG00000017780	-1.87068	7.91741	-7.42773	6.95788e-05	0.00109571	1.78968	Akr7a2	5	aldo-keto reductase family 7, member A2	ENSG00000211454	AKR7L	1	246181	6.95444	8.88037
ENSRNOG00000054058	-1.21704	6.70007	-7.42532	6.97403e-05	0.00109624	1.73527	Osbpl1a	18	oxysterol binding protein-like 1A	ENSG00000141447	OSBPL1A	1	114876	6.10176	7.29838
ENSRNOG00000009850	1.29615	4.01464	7.42347	6.98651e-05	0.00109678	1.95796	St3gal4	8	ST3 beta-galactoside alpha-2,3-sialyltransferase 4	ENSG00000110080	ST3GAL4	1	6484	4.62728	3.402
ENSRNOG00000001192	1.38326	4.75665	7.4172	7.02894e-05	0.00110202	1.83525	Gltp	12	glycolipid transfer protein	ENSG00000139433	GLTP	1	51228	5.42422	4.08908
ENSRNOG00000001005	4.12156	0.807619	7.41251	7.06084e-05	0.00110354	2.11956	Fcer2	12	Fc fragment of IgE receptor II	ENSG00000104921	FCER2	1	2208	2.84188	-1.22664
ENSRNOG00000015318	1.57588	4.51137	7.41216	7.06323e-05	0.00110354	1.87598	Heyl	5	hes-related family bHLH transcription factor with YRPW motif-like	ENSG00000163909	HEYL	1	26508	5.23697	3.78577
ENSRNOG00000008680	2.09305	6.04986	7.41176	7.06595e-05	0.00110354	1.75649	Loxl1	8	lysyl oxidase-like 1	ENSG00000129038	LOXL1	1	4016	6.9833	5.11642
ENSRNOG00000012325	-1.20037	7.20453	-7.40965	7.08036e-05	0.00110437	1.73173	Adk	15	adenosine kinase	ENSG00000156110	ADK	1	132	6.60634	7.80272
ENSRNOG00000000907	2.25034	2.01245	7.39412	7.18752e-05	0.00111597	2.18955	Alox5ap	12	arachidonate 5-lipoxygenase activating protein	ENSG00000132965	ALOX5AP	1	241	3.02664	0.998257
ENSRNOG00000031058	1.99943	2.67241	7.38812	7.22939e-05	0.00111597	2.1417	Was	X	Wiskott-Aldrich syndrome	ENSG00000015285	WAS	1	7454	3.60867	1.73615
ENSRNOG00000006715	3.736	0.0298895	7.38696	7.23747e-05	0.00111597	1.95007	Ccr1	8	C-C motif chemokine receptor 1	ENSG00000163823	CCR1	1	1230	1.76551	-1.70573
ENSRNOG00000020377	-1.44889	4.75742	-7.38774	7.23205e-05	0.00111597	1.87977	Cideb	15	cell death-inducing DFFA-like effector b	ENSG00000136305	CIDEB	1	27141	4.02294	5.4919
ENSRNOG00000020279	0.960882	4.46092	7.38795	7.23055e-05	0.00111597	1.84695	Syt11	2	synaptotagmin 11	ENSG00000132718	SYT11	1	23208	4.9089	4.01294
ENSRNOG00000019020	-1.06861	5.39778	-7.39289	7.19603e-05	0.00111597	1.76963	Bbs2	19	Bardet-Biedl syndrome 2	ENSG00000125124	BBS2	1	583	4.90843	5.88713
ENSRNOG00000006534	-0.776412	5.47855	-7.38786	7.23117e-05	0.00111597	1.74221	Crbn	4	cereblon	ENSG00000113851	CRBN	1	51185	5.09784	5.85927
ENSRNOG00000004442	-1.46893	6.42511	-7.39276	7.19699e-05	0.00111597	1.71169	RGD1311756	6	similar to hypothetical protein FLJ20950	ENSG00000133943	DGLUCY	1	80017	5.75524	7.09498
ENSRNOG00000011194	-0.905512	5.98414	-7.3936	7.19113e-05	0.00111597	1.71132	Tpp2	9	tripeptidyl peptidase 2	ENSG00000134900	TPP2	1	7174	5.56236	6.40591
ENSRNOG00000032417	3.22826	3.52042	7.384	7.25831e-05	0.00111637	2.05495	Gabrp	10	gamma-aminobutyric acid type A receptor pi subunit	ENSG00000094755	GABRP	1	2568	5.10365	1.9372
ENSRNOG00000001344	-1.43932	8.93132	-7.38397	7.25848e-05	0.00111637	1.81676	Aldh2	12	aldehyde dehydrogenase 2 family (mitochondrial)	ENSG00000111275	ALDH2	1	217	8.19377	9.66886
ENSRNOG00000001344	-1.43932	8.93132	-7.38397	7.25848e-05	0.00111637	1.81676	Aldh2	12	aldehyde dehydrogenase 2 family (mitochondrial)	ENSG00000257767	AC002996.1	0	NA	8.19377	9.66886
ENSRNOG00000014013	0.850726	6.55719	7.38114	7.2784e-05	0.00111802	1.68638	Map4k4	9	mitogen-activated protein kinase kinase kinase kinase 4	ENSG00000071054	MAP4K4	1	9448	7.00198	6.11239
ENSRNOG00000019999	2.64865	1.42234	7.37716	7.30656e-05	0.00112092	2.16874	Lypd3	1	Ly6/Plaur domain containing 3	ENSG00000124466	LYPD3	1	27076	2.75992	0.0847643
ENSRNOG00000055962	2.04376	7.42625	7.37458	7.32483e-05	0.00112231	1.74717	Bgn	X	biglycan	ENSG00000182492	BGN	1	633	8.3772	6.47529
ENSRNOG00000003228	0.937147	5.82794	7.36681	7.38027e-05	0.00112938	1.67467	Mid1ip1	X	MID1 interacting protein 1	ENSG00000165175	MID1IP1	1	58526	6.28264	5.37325
ENSRNOG00000001311	3.02059	0.111499	7.35676	7.45268e-05	0.00113616	1.97295	Rab36	20	RAB36, member RAS oncogene family	ENSG00000100228	RAB36	1	9609	1.55555	-1.33255
ENSRNOG00000003464	1.00784	4.80459	7.35776	7.44542e-05	0.00113616	1.7591	Hid1	10	HID1 domain containing	ENSG00000167861	HID1	1	283987	5.3002	4.30898
ENSRNOG00000005729	-1.41734	5.63313	-7.35698	7.45106e-05	0.00113616	1.72206	Palm3	19	paralemmin 3	ENSG00000187867	PALM3	1	342979	4.95161	6.31465
ENSRNOG00000045677	-2.83033	5.30158	-7.34935	7.50649e-05	0.00114293	1.85442	Nlrp6	1	NLR family, pyrin domain containing 6	ENSG00000174885	NLRP6	1	171389	4.00863	6.59453
ENSRNOG00000042189	1.46629	5.05571	7.34798	7.51652e-05	0.00114302	1.72408	Rab31	9	RAB31, member RAS oncogene family	ENSG00000168461	RAB31	1	11031	5.72497	4.38644
ENSRNOG00000003233	-2.8461	6.97508	-7.34314	7.55196e-05	0.00114697	1.6996	Serpinf2	10	serpin family F member 2	ENSG00000167711	SERPINF2	1	5345	5.60341	8.34675
ENSRNOG00000016727	-1.09859	9.73129	-7.33969	7.5774e-05	0.00114896	1.82947	Akr1a1	5	aldo-keto reductase family 1 member A1	ENSG00000117448	AKR1A1	1	10327	9.14604	10.3165
ENSRNOG00000052100	3.87999	-0.720834	7.3388	7.58398e-05	0.00114896	1.81151	Eddm3b	15	epididymal protein 3B	ENSG00000181562	EDDM3A	0	10876	1.19955	-2.64122
ENSRNOG00000052100	3.87999	-0.720834	7.3388	7.58398e-05	0.00114896	1.81151	Eddm3b	15	epididymal protein 3B	ENSG00000181552	EDDM3B	1	64184	1.19955	-2.64122
ENSRNOG00000019918	-0.912271	5.88638	-7.33604	7.60437e-05	0.00115061	1.65721	Coasy	10	Coenzyme A synthase	ENSG00000068120	COASY	1	80347	5.41409	6.35868
ENSRNOG00000008956	1.0964	3.38731	7.33292	7.62748e-05	0.00115261	1.97425	Cdkn2c	5	cyclin-dependent kinase inhibitor 2C	ENSG00000123080	CDKN2C	1	1031	3.9484	2.82621
ENSRNOG00000016219	-1.7827	5.28612	-7.32797	7.66441e-05	0.00115261	1.75251	Vnn1	1	vanin 1	ENSG00000112299	VNN1	1	8876	4.38347	6.18876
ENSRNOG00000009313	-1.22935	8.28529	-7.32788	7.66506e-05	0.00115261	1.71513	Lrpap1	14	LDL receptor related protein associated protein 1	ENSG00000163956	LRPAP1	1	4043	7.69281	8.87778
ENSRNOG00000061995	-1.47861	5.69986	-7.32931	7.65439e-05	0.00115261	1.69537	Grtp1	16	growth hormone regulated TBC protein 1	ENSG00000139835	GRTP1	1	79774	5.00057	6.39915
ENSRNOG00000014508	-1.91011	7.56629	-7.33168	7.63669e-05	0.00115261	1.67246	Mgll	4	monoglyceride lipase	ENSG00000074416	MGLL	1	11343	6.62486	8.50773
ENSRNOG00000022505	1.57833	3.22713	7.32518	7.68522e-05	0.00115421	1.98918	Slc17a4	17	solute carrier family 17, member 4	ENSG00000146039	SLC17A4	1	10050	3.98918	2.46509
ENSRNOG00000022576	-1.90987	5.42308	-7.31805	7.73885e-05	0.00116083	1.73916	Nudt12	9	nudix hydrolase 12	ENSG00000112874	NUDT12	1	83594	4.57296	6.27319
ENSRNOG00000011821	2.26991	3.6749	7.30796	7.81542e-05	0.00116827	1.92878	S100a4	2	S100 calcium-binding protein A4	ENSG00000196154	S100A4	1	6275	4.84522	2.50458
ENSRNOG00000016955	-1.03108	5.18985	-7.30854	7.811e-05	0.00116827	1.70529	Fam188a	17	family with sequence similarity 188, member A	ENSG00000148481	MINDY3	1	80013	4.69316	5.68655
ENSRNOG00000005690	0.884498	5.07676	7.30771	7.81733e-05	0.00116827	1.67622	Lmcd1	4	LIM and cysteine-rich domains 1	ENSG00000071282	LMCD1	1	29995	5.48103	4.6725
ENSRNOG00000050205	-1.73963	6.69734	-7.30049	7.87267e-05	0.00117509	1.61807	Afmid	10	arylformamidase	ENSG00000183077	AFMID	1	125061	5.86906	7.52562
ENSRNOG00000010524	-1.42061	6.98214	-7.29704	7.89926e-05	0.00117761	1.60801	Cryab	8	crystallin, alpha B	ENSG00000109846	CRYAB	1	1410	6.26475	7.69952
ENSRNOG00000019965	1.65774	3.54675	7.29564	7.91014e-05	0.00117779	1.92062	Tgfb1i1	1	transforming growth factor beta 1 induced transcript 1	ENSG00000140682	TGFB1I1	1	7041	4.27845	2.81505
ENSRNOG00000053047	2.88875	2.47219	7.2923	7.93596e-05	0.00118018	2.07021	Top2a	10	topoisomerase (DNA) II alpha	ENSG00000131747	TOP2A	1	7153	3.89066	1.05372
ENSRNOG00000046699	3.31705	2.32671	7.28777	7.97123e-05	0.00118309	2.08034	Slpi	3	secretory leukocyte peptidase inhibitor	ENSG00000124107	SLPI	1	6590	4.00745	0.645975
ENSRNOG00000005223	-4.248	6.44901	-7.28728	7.97504e-05	0.00118309	1.76042	Hnmt	3	histamine N-methyltransferase	ENSG00000150540	HNMT	1	3176	4.45916	8.43887
ENSRNOG00000019528	1.73778	2.46055	7.28528	7.99072e-05	0.00118397	2.05696	Plekhg6	4	pleckstrin homology and RhoGEF domain containing G6	ENSG00000008323	PLEKHG6	1	55200	3.24498	1.67611
ENSRNOG00000021273	-1.01363	5.29405	-7.28227	8.01431e-05	0.00118458	1.66672	Crls1	3	cardiolipin synthase 1	ENSG00000088766	CRLS1	1	54675	4.80497	5.78314
ENSRNOG00000046428	-1.03581	6.62586	-7.28234	8.01373e-05	0.00118458	1.5804	Lrrc75b	20	leucine rich repeat containing 75B	ENSG00000178026	LRRC75B	1	388886	6.15483	7.0969
ENSRNOG00000008298	0.691263	5.35184	7.27799	8.04791e-05	0.0011881	1.61129	Dock7	5	dedicator of cytokinesis 7	ENSG00000116641	DOCK7	1	85440	5.69932	5.00436
ENSRNOG00000015787	1.84467	2.07626	7.27528	8.06932e-05	0.00118937	2.0686	P3h4	10	prolyl 3-hydroxylase family member 4 (non-enzymatic)	ENSG00000141696	P3H4	1	10609	2.97312	1.1794
ENSRNOG00000016547	1.63028	2.4014	7.27397	8.07972e-05	0.00118937	2.04534	Rgs19	3	regulator of G-protein signaling 19	ENSG00000171700	RGS19	1	10287	3.17342	1.62937
ENSRNOG00000046128	0.790679	5.5503	7.27318	8.08596e-05	0.00118937	1.58956	Gpr108	9	G protein-coupled receptor 108	ENSG00000125734	GPR108	1	56927	5.93594	5.16466
ENSRNOG00000006108	2.28941	2.764	7.26801	8.12706e-05	0.00119397	2.015	Gngt2	10	G protein subunit gamma transducin 2	ENSG00000167083	GNGT2	1	2793	3.76837	1.75964
ENSRNOG00000015821	2.44852	1.00359	7.26621	8.14137e-05	0.00119463	2.03758	Cd2	2	Cd2 molecule	ENSG00000116824	CD2	1	914	2.16323	-0.156055
ENSRNOG00000001770	-2.59299	6.93476	-7.26453	8.15484e-05	0.00119516	1.60579	Ehhadh	11	enoyl-CoA hydratase and 3-hydroxyacyl CoA dehydrogenase	ENSG00000113790	EHHADH	1	1962	5.6942	8.17531
ENSRNOG00000010266	2.33307	1.96247	7.25807	8.20669e-05	0.00120131	2.05795	Cd180	2	CD180 molecule	ENSG00000134061	CD180	1	4064	3.06615	0.858782
ENSRNOG00000059605	-1.55833	3.55533	-7.25544	8.22791e-05	0.00120296	1.94661	Ddn	7	dendrin	ENSG00000181418	DDN	1	23109	2.80761	4.30305
ENSRNOG00000025689	-1.56233	4.74479	-7.25416	8.23826e-05	0.00120302	1.75007	Abhd1	6	abhydrolase domain containing 1	ENSG00000143994	ABHD1	1	84696	3.96033	5.52925
ENSRNOG00000014080	2.45463	1.17162	7.24765	8.29109e-05	0.00120494	2.03542	Kif23	8	kinesin family member 23	ENSG00000137807	KIF23	1	9493	2.34774	-0.00448914
ENSRNOG00000008970	-1.72181	3.7222	-7.24785	8.28946e-05	0.00120494	1.92004	Pcdh17	15	protocadherin 17	ENSG00000118946	PCDH17	1	27253	2.89938	4.54502
ENSRNOG00000002878	-2.90072	5.01096	-7.24947	8.27634e-05	0.00120494	1.80986	Afm	14	afamin	ENSG00000079557	AFM	1	173	3.65867	6.36325
ENSRNOG00000005437	-2.47959	10.0625	-7.25035	8.26917e-05	0.00120494	1.75231	Rida	7	reactive intermediate imine deaminase A homolog	ENSG00000132541	RIDA	1	10247	8.80216	11.3228
ENSRNOG00000016377	3.64719	-0.401999	7.23339	8.40821e-05	0.00121491	1.75813	Cep55	1	centrosomal protein 55	ENSG00000138180	CEP55	1	55165	1.42661	-2.23061
ENSRNOG00000017165	-1.18152	5.52703	-7.23767	8.3729e-05	0.00121491	1.59561	Akr1e2	17	aldo-keto reductase family 1, member E2	ENSG00000165568	AKR1E2	1	83592	4.91768	6.13639
ENSRNOG00000053498	-1.22694	5.58508	-7.23334	8.40859e-05	0.00121491	1.59082	Dnajc22	7	DnaJ heat shock protein family (Hsp40) member C22	ENSG00000178401	DNAJC22	1	79962	4.96407	6.20609
ENSRNOG00000015472	-1.8524	7.06589	-7.23659	8.3818e-05	0.00121491	1.55295	Tmem174	2	transmembrane protein 174	ENSG00000164325	TMEM174	1	134288	6.15933	7.97246
ENSRNOG00000014531	-0.860754	7.03194	-7.2332	8.40974e-05	0.00121491	1.53723	Hbs1l	1	HBS1-like translational GTPase	ENSG00000112339	HBS1L	1	10767	6.60592	7.45796
ENSRNOG00000004402	-1.09192	5.80376	-7.22805	8.45253e-05	0.00121964	1.55407	Lpgat1	13	lysophosphatidylglycerol acyltransferase 1	ENSG00000123684	LPGAT1	1	9926	5.31108	6.29643
ENSRNOG00000014021	1.56029	3.03065	7.21871	8.53068e-05	0.00122654	1.91955	Matn4	3	matrilin 4	ENSG00000124159	MATN4	1	8785	3.78729	2.27402
ENSRNOG00000038793	4.65568	-1.4598	7.22015	8.51855e-05	0.00122654	1.686	Spink13	18	serine peptidase inhibitor, Kazal type 13 (putative)	ENSG00000214510	SPINK13	1	153218	1.01996	-3.93955
ENSRNOG00000030894	-4.5516	7.05074	-7.21935	8.52525e-05	0.00122654	1.65675	Slco1a6	4	solute carrier organic anion transporter family, member 1a6	ENSG00000084453	SLCO1A2	1	6579	4.89715	9.20432
ENSRNOG00000009711	-0.97373	4.85101	-7.21159	8.59076e-05	0.0012308	1.64835	Hepacam2	4	HEPACAM family member 2	ENSG00000188175	HEPACAM2	1	253012	4.3446	5.35742
ENSRNOG00000015425	0.864327	4.87991	7.21212	8.58631e-05	0.0012308	1.59899	Ssx2ip	2	SSX family member 2 interacting protein	ENSG00000117155	SSX2IP	1	117178	5.28845	4.47137
ENSRNOG00000047708	-1.92803	6.23744	-7.21235	8.58435e-05	0.0012308	1.55023	Gstz1	6	glutathione S-transferase zeta 1	ENSG00000100577	GSTZ1	1	2954	5.28801	7.18686
ENSRNOG00000042084	-2.35307	9.34905	-7.20732	8.62701e-05	0.00123454	1.65836	Acsm1	1	acyl-CoA synthetase medium-chain family member 1	ENSG00000166743	ACSM1	1	116285	8.17288	10.5252
ENSRNOG00000012091	-0.896149	6.25625	-7.20564	8.64132e-05	0.00123513	1.49875	Ppa2	2	pyrophosphatase (inorganic) 2	ENSG00000138777	PPA2	1	27068	5.82994	6.68255
ENSRNOG00000053400	3.62507	3.18198	7.19941	8.69468e-05	0.00123693	1.93238	Cfi	2	complement factor I	ENSG00000205403	CFI	1	3426	4.83548	1.52848
ENSRNOG00000053400	3.62507	3.18198	7.19941	8.69468e-05	0.00123693	1.93238	Cfi	2	complement factor I	ENSG00000285330	AC126283.2	1	NA	4.83548	1.52848
ENSRNOG00000002273	1.85587	3.03277	7.20186	8.67369e-05	0.00123693	1.90563	Naaa	14	N-acylethanolamine acid amidase	ENSG00000138744	NAAA	1	27163	3.85651	2.20902
ENSRNOG00000033361	-2.55485	3.88287	-7.20008	8.6889e-05	0.00123693	1.90507	Slc39a5	7	solute carrier family 39 member 5	ENSG00000139540	SLC39A5	1	283375	2.62581	5.13992
ENSRNOG00000020714	0.97746	4.37598	7.19971	8.69212e-05	0.00123693	1.66088	Trpm4	1	transient receptor potential cation channel, subfamily M, member 4	ENSG00000130529	TRPM4	1	54795	4.85784	3.89412
ENSRNOG00000013954	-2.64274	7.31632	-7.19571	8.7265e-05	0.00124	1.53189	Alpl	5	alkaline phosphatase, liver/bone/kidney	ENSG00000162551	ALPL	1	249	5.98546	8.64718
ENSRNOG00000000096	-2.0862	8.8684	-7.19252	8.75407e-05	0.00124101	1.60985	Pdzk1	2	PDZ domain containing 1	ENSG00000174827	PDZK1	1	5174	7.81751	9.91929
ENSRNOG00000018086	-3.11493	7.48165	-7.19283	8.75144e-05	0.00124101	1.54452	Slc22a8	1	solute carrier family 22 member 8	ENSG00000149452	SLC22A8	1	9376	5.87108	9.09221
ENSRNOG00000009822	2.13752	2.36863	7.18753	8.79734e-05	0.0012444	1.96198	Tlr2	2	toll-like receptor 2	ENSG00000137462	TLR2	1	7097	3.38867	1.34859
ENSRNOG00000008323	2.35951	3.57934	7.18623	8.80872e-05	0.0012444	1.82288	Pitpnm3	10	PITPNM family member 3	ENSG00000091622	PITPNM3	1	83394	4.86548	2.2932
ENSRNOG00000029889	2.61553	3.90766	7.1871	8.80116e-05	0.0012444	1.79269	Clca4	2	chloride channel accessory 4	ENSG00000016602	CLCA4	1	22802	5.31625	2.49906
ENSRNOG00000005109	2.60888	2.05798	7.18392	8.82884e-05	0.00124559	1.9868	Rprm	3	reprimo, TP53 dependent G2 arrest mediator candidate	ENSG00000177519	RPRM	1	56475	3.2645	0.851463
ENSRNOG00000016967	1.7632	2.66174	7.16715	8.97672e-05	0.00124559	1.92188	Hfe	17	hemochromatosis	ENSG00000010704	HFE	1	3077	3.52643	1.79706
ENSRNOG00000007412	1.40089	3.24632	7.17323	8.92281e-05	0.00124559	1.84222	Dok1	4	docking protein 1	ENSG00000115325	DOK1	1	1796	3.86843	2.62422
ENSRNOG00000020669	-1.52168	4.07067	-7.16855	8.96425e-05	0.00124559	1.77888	Ovol1	1	ovo like transcriptional repressor 1	ENSG00000172818	OVOL1	1	5017	3.38575	4.7556
ENSRNOG00000002932	-1.45415	4.45462	-7.17903	8.87169e-05	0.00124559	1.71136	Wdr19	14	WD repeat domain 19	ENSG00000157796	WDR19	1	57728	3.81108	5.09817
ENSRNOG00000017964	-3.24643	5.3877	-7.17175	8.93588e-05	0.00124559	1.68537	Slc22a25	1	solute carrier family 22, member 25	ENSG00000149742	SLC22A9	1	114571	3.80519	6.97022
ENSRNOG00000049236	1.01075	9.26522	7.17075	8.94473e-05	0.00124559	1.64434	Myh9l1	7	myosin heavy chain 9-like 1	ENSG00000100345	MYH9	1	4627	9.77667	8.75377
ENSRNOG00000051964	-1.79863	9.3961	-7.18003	8.86289e-05	0.00124559	1.63448	LOC103691699	2	uncharacterized LOC103691699	ENSG00000138798	EGF	1	1950	8.53003	10.2622
ENSRNOG00000001742	-1.14013	4.86641	-7.16662	8.98137e-05	0.00124559	1.60221	LOC108348101	11	chloride channel protein 2	ENSG00000114859	CLCN2	1	1181	4.32674	5.40609
ENSRNOG00000015896	-1.0282	5.47941	-7.17849	8.8764e-05	0.00124559	1.53142	Rbpms2	8	RNA binding protein with multiple splicing 2	ENSG00000166831	RBPMS2	1	348093	4.97478	5.98404
ENSRNOG00000019316	0.922297	5.45589	7.17255	8.92876e-05	0.00124559	1.49162	Sh3bp4	9	SH3-domain binding protein 4	ENSG00000130147	SH3BP4	1	23677	5.8936	5.01818
ENSRNOG00000021149	-1.22868	7.41794	-7.16699	8.9781e-05	0.00124559	1.48483	Ush1c	1	USH1 protein network component harmonin	ENSG00000006611	USH1C	1	10083	6.80729	8.0286
ENSRNOG00000000867	0.90223	5.71641	7.17997	8.86344e-05	0.00124559	1.47946	Vars	20	valyl-tRNA synthetase	ENSG00000204394	VARS1	1	7407	6.16413	5.26868
ENSRNOG00000055391	-0.759711	5.92748	-7.17125	8.94028e-05	0.00124559	1.47333	Eif4ebp2	20	eukaryotic translation initiation factor 4E binding protein 2	ENSG00000148730	EIF4EBP2	1	1979	5.55378	6.30119
ENSRNOG00000011823	0.889561	6.56138	7.1727	8.92743e-05	0.00124559	1.46604	Tfap2b	9	transcription factor AP-2 beta	ENSG00000008196	TFAP2B	1	7021	7.04087	6.0819
ENSRNOG00000021053	0.745669	6.24323	7.17764	8.88392e-05	0.00124559	1.46126	Lsr	1	lipolysis stimulated lipoprotein receptor	ENSG00000105699	LSR	1	51599	6.59357	5.8929
ENSRNOG00000046946	2.97635	1.31834	7.15475	9.08772e-05	0.0012589	1.96113	Ptchd3	10	patched domain containing 3	ENSG00000182077	PTCHD3	1	374308	2.94221	-0.305526
ENSRNOG00000013641	-1.65981	5.59844	-7.15235	9.10944e-05	0.00126047	1.52431	Myo7a	1	myosin VIIA	ENSG00000137474	MYO7A	1	4647	4.8685	6.32838
ENSRNOG00000013727	2.28451	0.880863	7.1432	9.19256e-05	0.00126912	1.91917	Ndc80	9	NDC80 kinetochore complex component	ENSG00000080986	NDC80	1	10403	2.02147	-0.259745
ENSRNOG00000052873	-1.24422	6.18428	-7.14316	9.19291e-05	0.00126912	1.4472	Npnt	2	nephronectin	ENSG00000168743	NPNT	1	255743	5.58733	6.78123
ENSRNOG00000001645	1.348	4.20764	7.13364	9.28032e-05	0.00127973	1.62576	Filip1l	11	filamin A interacting protein 1-like	ENSG00000168386	FILIP1L	1	11259	4.87698	3.5383
ENSRNOG00000004009	-2.65472	7.07676	-7.12812	9.33148e-05	0.00128533	1.46081	Xpnpep2	X	X-prolyl aminopeptidase 2	ENSG00000122121	XPNPEP2	1	7512	5.77785	8.37567
ENSRNOG00000012083	1.11141	5.61562	7.12688	9.34295e-05	0.00128545	1.43095	St6galnac2	10	ST6 N-acetylgalactosaminide alpha-2,6-sialyltransferase 2	ENSG00000070731	ST6GALNAC2	1	10610	6.14087	5.09037
ENSRNOG00000015674	1.8614	2.87709	7.12087	9.39904e-05	0.00128893	1.84365	Acap1	10	ArfGAP with coiled-coil, ankyrin repeat and PH domains 1	ENSG00000072818	ACAP1	1	9744	3.82429	1.92988
ENSRNOG00000010210	4.45061	-0.868466	7.11932	9.4136e-05	0.00128893	1.6878	Slc7a11	2	solute carrier family 7 member 11	ENSG00000151012	SLC7A11	1	23657	1.42759	-3.16452
ENSRNOG00000012892	-1.18819	4.69433	-7.1214	9.39408e-05	0.00128893	1.59451	Abca4	2	ATP binding cassette subfamily A member 4	ENSG00000198691	ABCA4	1	24	4.12065	5.268
ENSRNOG00000013889	1.21045	4.38942	7.1185	9.42133e-05	0.00128893	1.57161	Tmed3	8	transmembrane p24 trafficking protein 3	ENSG00000166557	TMED3	1	23423	4.96029	3.81854
ENSRNOG00000018109	-0.67343	6.54085	-7.11956	9.41129e-05	0.00128893	1.39932	Clic4	5	chloride intracellular channel 4	ENSG00000169504	CLIC4	1	25932	6.19776	6.88394
ENSRNOG00000015439	-0.78512	7.23591	-7.11623	9.44261e-05	0.00129038	1.42284	Man2a1	9	mannosidase, alpha, class 2A, member 1	ENSG00000112893	MAN2A1	1	4124	6.86508	7.60674
ENSRNOG00000028930	-0.868792	7.55254	-7.10988	9.50261e-05	0.00129712	1.43421	Dab2	2	DAB2, clathrin adaptor protein	ENSG00000153071	DAB2	1	1601	7.14525	7.95983
ENSRNOG00000014702	-2.10181	4.07093	-7.10413	9.55726e-05	0.00130312	1.74926	Elovl2	17	ELOVL fatty acid elongase 2	ENSG00000197977	ELOVL2	1	54898	3.07254	5.06932
ENSRNOG00000018092	1.60734	3.25318	7.09949	9.60159e-05	0.00130345	1.75245	Cd83	17	CD83 molecule	ENSG00000112149	CD83	1	9308	4.02561	2.48075
ENSRNOG00000037446	-1.76713	4.60751	-7.0957	9.63803e-05	0.00130345	1.61678	Pxmp2	12	peroxisomal membrane protein 2	ENSG00000176894	PXMP2	1	5827	3.76661	5.44841
ENSRNOG00000023400	1.27581	4.20758	7.09879	9.60825e-05	0.00130345	1.58844	Dtx3l	11	deltex E3 ubiquitin ligase 3L	ENSG00000163840	DTX3L	1	151636	4.84367	3.57149
ENSRNOG00000011913	2.5942	6.85439	7.09771	9.61866e-05	0.00130345	1.44722	Cp	2	ceruloplasmin	ENSG00000047457	CP	1	1356	8.07945	5.62933
ENSRNOG00000019742	0.727191	7.71244	7.09496	9.64509e-05	0.00130345	1.44455	Stat3	10	signal transducer and activator of transcription 3	ENSG00000168610	STAT3	1	6774	8.07645	7.34843
ENSRNOG00000023202	-0.77349	5.8053	-7.09771	9.6187e-05	0.00130345	1.40298	Usp15	7	ubiquitin specific peptidase 15	ENSG00000135655	USP15	1	9958	5.43623	6.17436
ENSRNOG00000004284	0.73662	7.03025	7.09491	9.64562e-05	0.00130345	1.40002	Btg1	7	BTG anti-proliferation factor 1	ENSG00000133639	BTG1	1	694	7.38772	6.67278
ENSRNOG00000011231	-4.31298	-1.69211	-7.09727	9.6229e-05	0.00130345	1.31221	Cntnap4	19	contactin associated protein-like 4	ENSG00000152910	CNTNAP4	1	85445	-3.9088	0.524582
ENSRNOG00000011231	-4.31298	-1.69211	-7.09727	9.6229e-05	0.00130345	1.31221	Cntnap4	19	contactin associated protein-like 4	ENSG00000287694	AC106741.1	1	NA	-3.9088	0.524582
ENSRNOG00000001469	2.14257	5.00775	7.09161	9.67741e-05	0.00130484	1.48666	Eln	12	elastin	ENSG00000049540	ELN	1	2006	5.98034	4.03516
ENSRNOG00000010388	-3.22371	7.65428	-7.09195	9.67411e-05	0.00130484	1.43934	Slc21a4	4	kidney specific organic anion transporter	ENSG00000084453	SLCO1A2	1	6579	6.10539	9.20317
ENSRNOG00000005807	3.13857	1.68391	7.08928	9.69998e-05	0.00130643	1.90139	Ptpn7	13	protein tyrosine phosphatase, non-receptor type 7	ENSG00000143851	PTPN7	1	5778	3.15054	0.217285
ENSRNOG00000024931	1.6954	3.51509	7.0871	9.72114e-05	0.00130783	1.70626	Ccdc88b	1	coiled-coil domain containing 88B	ENSG00000168071	CCDC88B	1	283234	4.41132	2.61886
ENSRNOG00000036839	0.971457	7.61369	7.08436	9.74782e-05	0.00130996	1.43305	Hnrnpa1	7	heterogeneous nuclear ribonucleoprotein A1	ENSG00000135486	HNRNPA1	1	3178	8.1246	7.10278
ENSRNOG00000049517	1.41499	2.88662	7.08097	9.7809e-05	0.00131151	1.7894	Tnfaip3	1	TNF alpha induced protein 3	ENSG00000118503	TNFAIP3	1	7128	3.6159	2.15734
ENSRNOG00000031930	0.970572	5.25265	7.08198	9.77108e-05	0.00131151	1.41173	Bin2	7	bridging integrator 2	ENSG00000110934	BIN2	1	51411	5.72452	4.78078
ENSRNOG00000000902	-0.758506	7.42732	-7.07879	9.80223e-05	0.00131291	1.39322	Hsph1	12	heat shock protein family H (Hsp110) member 1	ENSG00000120694	HSPH1	1	10808	7.02933	7.82531
ENSRNOG00000027894	3.11885	1.11989	7.07405	9.84887e-05	0.00131674	1.8761	Iqgap3	2	IQ motif containing GTPase activating protein 3	ENSG00000183856	IQGAP3	1	128239	2.77899	-0.539205
ENSRNOG00000048222	1.95762	2.35349	7.07368	9.85251e-05	0.00131674	1.84653	Nlrc5	19	NLR family, CARD domain containing 5	ENSG00000140853	NLRC5	1	84166	3.34968	1.35729
ENSRNOG00000008843	-1.43651	6.69493	-7.06878	9.90095e-05	0.00132176	1.36089	Eci1	10	enoyl-CoA delta isomerase 1	ENSG00000167969	ECI1	1	1632	5.97787	7.41198
ENSRNOG00000017250	0.767547	4.80263	7.06521	9.93646e-05	0.00132504	1.4513	Gmpr	17	guanosine monophosphate reductase	ENSG00000137198	GMPR	1	2766	5.18762	4.41764
ENSRNOG00000002950	2.06444	1.52116	7.05984	9.99007e-05	0.00132927	1.87281	Lyl1	19	LYL1, basic helix-loop-helix family member	ENSG00000104903	LYL1	1	4066	2.5049	0.537431
ENSRNOG00000016896	0.986586	9.45926	7.0609	9.97949e-05	0.00132927	1.53955	Rpl3	7	ribosomal protein L3	ENSG00000100316	RPL3	1	6122	9.92238	8.99614
ENSRNOG00000019478	1.04303	3.91758	7.05866	0.000100019	0.00132939	1.59133	Irf9	15	interferon regulatory factor 9	ENSG00000213928	IRF9	1	10379	4.45467	3.38048
ENSRNOG00000010079	2.83676	6.60595	7.05701	0.000100184	0.00133012	1.40911	Car3	2	carbonic anhydrase 3	ENSG00000164879	CA3	1	761	7.93952	5.27238
ENSRNOG00000036666	0.851656	4.84129	7.05542	0.000100344	0.0013308	1.43442	LOC619574	10	hypothetical protein LOC619574	ENSG00000178927	CYBC1	1	79415	5.26412	4.41845
ENSRNOG00000014629	4.02873	0.0553873	7.05119	0.000100771	0.00133499	1.67832	Lmo1	1	LIM domain only 1	ENSG00000166407	LMO1	1	4004	1.94292	-1.83215
ENSRNOG00000017022	1.67727	4.68831	7.04953	0.000100939	0.00133576	1.46243	Cerk	7	ceramide kinase	ENSG00000100422	CERK	1	64781	5.45811	3.91851
ENSRNOG00000032778	2.1381	1.16778	7.04743	0.000101152	0.00133627	1.84742	Bub1	3	BUB1 mitotic checkpoint serine/threonine kinase	ENSG00000169679	BUB1	1	699	2.23144	0.104127
ENSRNOG00000057256	-3.28643	1.16635	-7.04644	0.000101252	0.00133627	1.72439	Slc19a3	9	solute carrier family 19 member 3	ENSG00000135917	SLC19A3	1	80704	-0.424094	2.75679
ENSRNOG00000019118	-2.44361	9.03007	-7.0459	0.000101308	0.00133627	1.46578	Slc13a3	3	solute carrier family 13 member 3	ENSG00000158296	SLC13A3	1	64849	7.75576	10.3044
ENSRNOG00000012440	-2.04408	6.0175	-7.03811	0.000102103	0.0013453	1.38696	Msra	15	methionine sulfoxide reductase A	ENSG00000175806	MSRA	1	4482	5.02332	7.01168
ENSRNOG00000014613	-1.76421	8.88993	-7.03514	0.000102409	0.00134786	1.44158	Ddah1	2	dimethylarginine dimethylaminohydrolase 1	ENSG00000153904	DDAH1	1	23576	8.01539	9.76446
ENSRNOG00000050223	1.44583	3.56171	7.03299	0.00010263	0.00134931	1.62573	Rin1	1	Ras and Rab interactor 1	ENSG00000174791	RIN1	1	9610	4.27085	2.85258
ENSRNOG00000023458	3.38983	0.769789	7.03128	0.000102806	0.00135017	1.81208	Dcaf12l1	X	DDB1 and CUL4 associated factor 12-like 1	ENSG00000198354	DCAF12L2	1	340578	2.67211	-1.13253
ENSRNOG00000005101	-0.981159	6.74052	-7.02776	0.000103171	0.00135349	1.30736	Mia2	6	melanoma inhibitory activity 2	ENSG00000271321	CTAGE6	1	340307	6.28592	7.19513
ENSRNOG00000005101	-0.981159	6.74052	-7.02776	0.000103171	0.00135349	1.30736	Mia2	6	melanoma inhibitory activity 2	ENSG00000225932	CTAGE4	1	100128553	6.28592	7.19513
ENSRNOG00000005101	-0.981159	6.74052	-7.02776	0.000103171	0.00135349	1.30736	Mia2	6	melanoma inhibitory activity 2	ENSG00000271079	CTAGE15	1	441294	6.28592	7.19513
ENSRNOG00000005101	-0.981159	6.74052	-7.02776	0.000103171	0.00135349	1.30736	Mia2	6	melanoma inhibitory activity 2	ENSG00000212710	CTAGE1	1	64693	6.28592	7.19513
ENSRNOG00000005101	-0.981159	6.74052	-7.02776	0.000103171	0.00135349	1.30736	Mia2	6	melanoma inhibitory activity 2	ENSG00000236761	CTAGE9	1	643854	6.28592	7.19513
ENSRNOG00000005101	-0.981159	6.74052	-7.02776	0.000103171	0.00135349	1.30736	Mia2	6	melanoma inhibitory activity 2	ENSG00000150527	MIA2	0	4253	6.28592	7.19513
ENSRNOG00000005101	-0.981159	6.74052	-7.02776	0.000103171	0.00135349	1.30736	Mia2	6	melanoma inhibitory activity 2	ENSG00000244693	CTAGE8	1	100142659	6.28592	7.19513
ENSRNOG00000050761	4.10413	2.27572	7.02151	0.000103822	0.00135617	1.83284	LOC100909524	6	protein Z-dependent protease inhibitor-like	ENSG00000140093	SERPINA10	1	51156	4.09077	0.460668
ENSRNOG00000006096	-1.77034	3.58267	-7.02248	0.000103721	0.00135617	1.70953	Slc26a7	5	solute carrier family 26 member 7	ENSG00000147606	SLC26A7	1	115111	2.7615	4.40383
ENSRNOG00000008062	-1.21673	3.93492	-7.02447	0.000103513	0.00135617	1.62741	Dqx1	4	DEAQ box RNA-dependent ATPase 1	ENSG00000144045	DQX1	1	165545	3.37215	4.49768
ENSRNOG00000010188	-1.47793	4.26963	-7.02184	0.000103788	0.00135617	1.58134	Satb2	9	SATB homeobox 2	ENSG00000119042	SATB2	1	23314	3.609	4.93026
ENSRNOG00000018953	1.76972	3.1238	7.01728	0.000104266	0.00135785	1.69956	Cblc	1	Cbl proto-oncogene C	ENSG00000142273	CBLC	1	23624	4.04305	2.20454
ENSRNOG00000014828	0.733767	5.32784	7.01747	0.000104245	0.00135785	1.33574	Avpi1	1	arginine vasopressin-induced 1	ENSG00000119986	AVPI1	1	60370	5.6708	4.98489
ENSRNOG00000015162	-1.16623	7.59206	-7.01708	0.000104286	0.00135785	1.33509	Lonp2	19	lon peptidase 2, peroxisomal	ENSG00000102910	LONP2	1	83752	7.00498	8.17914
ENSRNOG00000045686	-1.57568	8.49487	-7.00664	0.000105389	0.00137073	1.38333	Nfs1	3	NFS1 cysteine desulfurase	ENSG00000244005	NFS1	1	9054	7.73785	9.25189
ENSRNOG00000019982	-0.720796	6.69496	-7.00316	0.000105759	0.00137408	1.27595	Ethe1	1	ETHE1, persulfide dioxygenase	ENSG00000105755	ETHE1	1	23474	6.32272	7.0672
ENSRNOG00000021412	2.15154	2.86257	6.99657	0.000106465	0.00137734	1.70411	Slfn13	10	schlafen family member 13	ENSG00000154760	SLFN13	1	146857	4.02435	1.7008
ENSRNOG00000026504	1.20935	3.37194	6.99939	0.000106162	0.00137734	1.62626	Fam114a1	14	family with sequence similarity 114, member A1	ENSG00000197712	FAM114A1	1	92689	3.97143	2.77245
ENSRNOG00000012142	-2.42934	8.43435	-6.99845	0.000106262	0.00137734	1.36753	Glyat	1	glycine-N-acyltransferase	ENSG00000149124	GLYAT	1	10249	7.25018	9.61851
ENSRNOG00000052113	1.16758	6.40323	6.99692	0.000106427	0.00137734	1.27766	Ppp1r9b	10	protein phosphatase 1, regulatory subunit 9B	ENSG00000108819	PPP1R9B	1	84687	6.94246	5.86399
ENSRNOG00000025843	1.65656	3.43212	6.99352	0.000106793	0.00138012	1.62665	Ccdc102a	19	coiled-coil domain containing 102A	ENSG00000135736	CCDC102A	1	92922	4.23804	2.62619
ENSRNOG00000007110	1.17397	3.65185	6.98532	0.000107682	0.00138805	1.56149	Ankrd6	5	ankyrin repeat domain 6	ENSG00000135299	ANKRD6	1	22881	4.22103	3.08268
ENSRNOG00000007927	-2.54311	5.5299	-6.98511	0.000107704	0.00138805	1.412	Mettl7b	7	methyltransferase like 7B	ENSG00000170439	METTL7B	1	196410	4.28427	6.77552
ENSRNOG00000055751	-0.827487	6.86208	-6.98469	0.00010775	0.00138805	1.26237	P3h2	11	prolyl 3-hydroxylase 2	ENSG00000090530	P3H2	1	55214	6.47469	7.24947
ENSRNOG00000046535	1.68779	2.56204	6.98216	0.000108026	0.00139013	1.73526	Ppm1m	8	protein phosphatase, Mg2+/Mn2+ dependent, 1M	ENSG00000164088	PPM1M	1	132160	3.35264	1.77143
ENSRNOG00000007023	-1.32676	7.72926	-6.98077	0.000108177	0.00139061	1.30251	Galm	6	galactose mutarotase	ENSG00000143891	GALM	1	130589	7.05501	8.40351
ENSRNOG00000012749	2.73689	3.68109	6.97293	0.000109039	0.0014002	1.58513	C1qb	5	complement C1q B chain	ENSG00000173369	C1QB	1	713	4.98848	2.37371
ENSRNOG00000020667	1.08479	6.82927	6.97187	0.000109156	0.00140022	1.26282	Shisa5	8	shisa family member 5	ENSG00000164054	SHISA5	1	51246	7.32679	6.33174
ENSRNOG00000011490	2.69176	1.13255	6.97081	0.000109273	0.00140024	1.7696	Angptl8	8	angiopoietin-like 8	ENSG00000130173	ANGPTL8	1	55908	2.39144	-0.126334
ENSRNOG00000013293	-1.84198	6.8176	-6.9566	0.000110856	0.00141903	1.24929	Mccc1	2	methylcrotonoyl-CoA carboxylase 1	ENSG00000078070	MCCC1	1	56922	5.94961	7.6856
ENSRNOG00000060931	-0.903976	5.02198	-6.95491	0.000111046	0.00141997	1.34866	Rspry1	19	ring finger and SPRY domain containing 1	ENSG00000159579	RSPRY1	1	89970	4.57011	5.47385
ENSRNOG00000012262	-1.54967	4.33088	-6.95254	0.000111313	0.00142188	1.50415	Depdc7	3	DEP domain containing 7	ENSG00000121690	DEPDC7	1	91614	3.57975	5.082
ENSRNOG00000001229	1.0363	8.60332	6.94964	0.000111642	0.00142458	1.35681	Col18a1	20	collagen type XVIII alpha 1 chain	ENSG00000182871	COL18A1	1	80781	9.09935	8.10729
ENSRNOG00000057703	-4.7684	-0.61685	-6.94611	0.000112042	0.00142519	1.27983	Cabp7	14	calcium binding protein 7	ENSG00000100314	CABP7	1	164633	-2.96629	1.73259
ENSRNOG00000010237	1.3357	6.21796	6.94654	0.000111993	0.00142519	1.22582	Map7d1	5	MAP7 domain containing 1	ENSG00000116871	MAP7D1	1	55700	6.82479	5.61113
ENSRNOG00000018796	-0.754115	6.67732	-6.94617	0.000112036	0.00142519	1.21341	Herpud1	19	homocysteine inducible ER protein with ubiquitin like domain 1	ENSG00000051108	HERPUD1	1	9709	6.29107	7.06356
ENSRNOG00000058692	-1.10658	6.77911	-6.93688	0.000113098	0.00143711	1.21009	Slc26a4	6	solute carrier family 26 member 4	ENSG00000091137	SLC26A4	1	5172	6.26535	7.29288
ENSRNOG00000012333	-0.868509	5.81394	-6.9343	0.000113394	0.00143937	1.22646	Kbtbd11	16	kelch repeat and BTB domain containing 11	ENSG00000176595	KBTBD11	1	9920	5.37208	6.25579
ENSRNOG00000048487	1.01941	4.45675	6.93215	0.000113642	0.00144101	1.36658	Slc12a9	12	solute carrier family 12, member 9	ENSG00000146828	SLC12A9	1	56996	4.91346	4.00004
ENSRNOG00000007862	-1.0086	8.65855	-6.92943	0.000113956	0.00144198	1.31401	Acat1	8	acetyl-CoA acetyltransferase 1	ENSG00000075239	ACAT1	1	38	8.16	9.15711
ENSRNOG00000020202	-1.84224	7.46167	-6.92947	0.000113951	0.00144198	1.23196	Asrgl1	1	asparaginase like 1	ENSG00000162174	ASRGL1	1	80150	6.55916	8.36418
ENSRNOG00000012771	0.744026	6.23632	6.92622	0.000114329	0.0014452	1.18758	Ddx41	17	DEAD-box helicase 41	ENSG00000183258	DDX41	1	51428	6.5909	5.88174
ENSRNOG00000025811	1.96848	2.94091	6.9244	0.000114541	0.00144636	1.62967	Cfp	X	complement factor properdin	ENSG00000126759	CFP	1	5199	3.86923	2.01258
ENSRNOG00000016731	1.92917	5.04378	6.9203	0.000115019	0.00144938	1.28303	Tpm2	5	tropomyosin 2, beta	ENSG00000198467	TPM2	1	7169	5.89043	4.19712
ENSRNOG00000015859	-1.37151	7.92883	-6.92053	0.000114993	0.00144938	1.24736	Chdh	16	choline dehydrogenase	ENSG00000016391	CHDH	1	55349	7.22451	8.63314
ENSRNOG00000012073	-1.49659	7.75073	-6.91811	0.000115276	0.00145111	1.23335	Abhd14b	8	abhydrolase domain containing 14b	ENSG00000114779	ABHD14B	1	84836	6.99539	8.50606
ENSRNOG00000012183	1.20936	3.5681	6.91148	0.000116057	0.00145642	1.50301	Glrx	2	glutaredoxin	ENSG00000173221	GLRX	1	2745	4.1164	3.01981
ENSRNOG00000049063	-1.50893	4.19721	-6.91274	0.000115908	0.00145642	1.47671	Slc16a9	20	solute carrier family 16 (monocarboxylic acid transporters), member 9	ENSG00000165449	SLC16A9	1	220963	3.49062	4.90379
ENSRNOG00000003620	-3.12284	8.15007	-6.91183	0.000116016	0.00145642	1.2591	Fmo3	13	flavin containing monooxygenase 3	ENSG00000007933	FMO3	1	2328	6.6282	9.67194
ENSRNOG00000004367	1.38038	5.44301	6.90909	0.00011634	0.00145846	1.2119	Elk3	7	ELK3, ETS-domain protein	ENSG00000111145	ELK3	1	2004	6.08235	4.80368
ENSRNOG00000000632	2.98657	0.970372	6.90611	0.000116694	0.00146138	1.70854	Cdk1	20	cyclin-dependent kinase 1	ENSG00000170312	CDK1	1	983	2.57817	-0.637423
ENSRNOG00000017600	0.682306	5.365	6.90273	0.000117097	0.00146492	1.20382	Ptpn9	8	protein tyrosine phosphatase, non-receptor type 9	ENSG00000169410	PTPN9	1	5780	5.70218	5.02783
ENSRNOG00000014603	3.24455	0.0299178	6.90055	0.000117357	0.00146666	1.558	Sgcg	15	sarcoglycan, gamma	ENSG00000102683	SGCG	1	6445	1.55189	-1.49206
ENSRNOG00000017987	3.6484	0.520076	6.89795	0.000117668	0.00146904	1.64921	Ucma	17	upper zone of growth plate and cartilage matrix associated	ENSG00000165623	UCMA	1	221044	2.29438	-1.25423
ENSRNOG00000016794	-1.31278	6.73298	-6.89507	0.000118014	0.00147184	1.1673	Phyhd1	3	phytanoyl-CoA dioxygenase domain containing 1	ENSG00000175287	PHYHD1	1	254295	6.06268	7.40328
ENSRNOG00000055277	-0.77878	6.34882	-6.89359	0.000118193	0.00147256	1.15458	LOC100362333	5	DNA-directed DNA polymerase epsilon 3	ENSG00000148229	POLE3	1	54107	5.95033	6.74731
ENSRNOG00000019700	-2.64761	4.50113	-6.89129	0.000118471	0.00147451	1.48822	Proz	16	protein Z, vitamin K-dependent plasma glycoprotein	ENSG00000126231	PROZ	1	8858	3.25658	5.74567
ENSRNOG00000014218	-1.26008	4.14567	-6.88826	0.000118838	0.00147756	1.44261	Tmem25	8	transmembrane protein 25	ENSG00000149582	TMEM25	1	84866	3.52951	4.76184
ENSRNOG00000037931	1.99775	1.61594	6.88049	0.000119785	0.00148629	1.69638	Plaur	1	plasminogen activator, urokinase receptor	ENSG00000011422	PLAUR	1	5329	2.59615	0.635733
ENSRNOG00000005424	-1.78738	8.85841	-6.88076	0.000119752	0.00148629	1.2665	Odc1	6	ornithine decarboxylase 1	ENSG00000115758	ODC1	1	4953	7.94011	9.77671
ENSRNOG00000018233	1.03758	8.35414	6.87801	0.000120089	0.00148854	1.26114	Gas6	16	growth arrest specific 6	ENSG00000183087	GAS6	1	2621	8.83382	7.87446
ENSRNOG00000018488	2.05295	1.53542	6.87268	0.000120745	0.00149436	1.69011	Cd40	3	CD40 molecule	ENSG00000101017	CD40	1	958	2.55069	0.520152
ENSRNOG00000010081	-1.34195	4.29379	-6.86937	0.000121155	0.00149436	1.39661	Tmem144	2	transmembrane protein 144	ENSG00000164124	TMEM144	1	55314	3.65157	4.93601
ENSRNOG00000013415	0.999842	4.50734	6.86964	0.00012112	0.00149436	1.28008	Ptpn18	9	protein tyrosine phosphatase, non-receptor type 18	ENSG00000072135	PTPN18	1	26469	5.04669	3.968
ENSRNOG00000054962	-2.32279	8.74968	-6.86921	0.000121175	0.00149436	1.24853	Dao	12	D-amino-acid oxidase	ENSG00000110887	DAO	1	1610	7.56894	9.93041
ENSRNOG00000016337	-1.47997	7.18316	-6.87091	0.000120964	0.00149436	1.1532	Slc22a1	1	solute carrier family 22 member 1	ENSG00000175003	SLC22A1	1	6580	6.40034	7.96597
ENSRNOG00000000826	0.809077	6.50815	6.86543	0.000121644	0.00149862	1.12672	Flot1	20	flotillin 1	ENSG00000137312	FLOT1	1	10211	6.88625	6.13005
ENSRNOG00000020308	-1.10031	7.06948	-6.86215	0.000122053	0.00150214	1.13565	Ech1	1	enoyl-CoA hydratase 1	ENSG00000104823	ECH1	1	1891	6.51646	7.6225
ENSRNOG00000015845	1.08739	7.03517	6.85489	0.000122963	0.00151181	1.1453	Fam129b	3	family with sequence similarity 129, member B	ENSG00000136830	NIBAN2	1	64855	7.53927	6.53107
ENSRNOG00000032246	-4.27712	5.85075	-6.85272	0.000123238	0.00151232	1.33854	Acsm3	1	acyl-CoA synthetase medium-chain family member 3	ENSG00000005187	ACSM3	1	6296	3.70754	7.99397
ENSRNOG00000052795	1.30337	5.98123	6.85259	0.000123254	0.00151232	1.12224	Itpr3	20	inositol 1,4,5-trisphosphate receptor, type 3	ENSG00000096433	ITPR3	1	3710	6.67489	5.28757
ENSRNOG00000001514	3.15777	1.14585	6.85051	0.000123517	0.00151401	1.66289	Cdca7	3	cell division cycle associated 7	ENSG00000144354	CDCA7	1	83879	2.75905	-0.467336
ENSRNOG00000013288	-0.647397	6.43953	-6.8493	0.00012367	0.00151437	1.10203	Xpo7	15	exportin 7	ENSG00000130227	XPO7	1	23039	6.12901	6.75004
ENSRNOG00000018958	2.98	0.836219	6.84536	0.000124172	0.00151584	1.63309	Mt3	19	metallothionein 3	ENSG00000087250	MT3	1	4504	2.35734	-0.684907
ENSRNOG00000025383	-1.00255	9.02181	-6.84451	0.00012428	0.00151584	1.24718	Pdha1	X	pyruvate dehydrogenase (lipoamide) alpha 1	ENSG00000131828	PDHA1	1	5160	8.52903	9.51459
ENSRNOG00000016448	0.928219	4.97921	6.84443	0.00012429	0.00151584	1.18367	Eef2k	1	eukaryotic elongation factor-2 kinase	ENSG00000103319	EEF2K	1	29904	5.46281	4.4956
ENSRNOG00000016448	0.928219	4.97921	6.84443	0.00012429	0.00151584	1.18367	Eef2k	1	eukaryotic elongation factor-2 kinase	ENSG00000103319	EEF2K	1	101930123	5.46281	4.4956
ENSRNOG00000000566	-1.12966	7.03148	-6.84672	0.000123997	0.00151584	1.11769	Pcbd1	20	pterin-4 alpha-carbinolamine dehydratase 1	ENSG00000166228	PCBD1	1	5092	6.43269	7.63027
ENSRNOG00000005828	-0.999052	9.12355	-6.84305	0.000124466	0.00151646	1.25194	Skp1	10	S-phase kinase-associated protein 1	ENSG00000113558	SKP1	1	6500	8.6197	9.6274
ENSRNOG00000031934	0.757081	4.53847	6.84184	0.00012462	0.00151682	1.24835	Enah	13	enabled homolog (Drosophila)	ENSG00000154380	ENAH	1	55740	4.9077	4.16924
ENSRNOG00000012794	-1.82158	8.69521	-6.84059	0.00012478	0.00151724	1.21541	Grhpr	5	glyoxylate and hydroxypyruvate reductase	ENSG00000137106	GRHPR	1	9380	7.7749	9.61552
ENSRNOG00000013223	-2.22663	6.90109	-6.83722	0.000125213	0.00152097	1.1296	Fah	1	fumarylacetoacetate hydrolase	ENSG00000103876	FAH	1	2184	5.81315	7.98903
ENSRNOG00000006807	-2.07468	10.9466	-6.83515	0.000125479	0.00152268	1.37257	Aldob	5	aldolase, fructose-bisphosphate B	ENSG00000136872	ALDOB	1	229	9.87601	12.0171
ENSRNOG00000018952	-1.76496	7.53739	-6.83236	0.000125838	0.00152433	1.1302	Sema3g	16	semaphorin 3G	ENSG00000010319	SEMA3G	1	56920	6.67351	8.40126
ENSRNOG00000051061	-1.85017	6.79387	-6.83216	0.000125865	0.00152433	1.11285	Prep	20	prolyl endopeptidase	ENSG00000085377	PREP	1	5550	5.90623	7.68151
ENSRNOG00000006367	-2.99255	3.94827	-6.82997	0.000126148	0.00152623	1.53274	Slc5a8	7	solute carrier family 5 member 8	ENSG00000256870	SLC5A8	1	160728	2.51753	5.37901
ENSRNOG00000022101	3.06253	0.0627221	6.82482	0.000126818	0.00152706	1.51376	Crabp2	2	cellular retinoic acid binding protein 2	ENSG00000143320	CRABP2	1	1382	1.71369	-1.58825
ENSRNOG00000020865	1.96606	3.18257	6.82692	0.000126544	0.00152706	1.49699	Ano1	1	anoctamin 1	ENSG00000131620	ANO1	1	55107	4.164	2.20114
ENSRNOG00000029195	1.46374	3.14741	6.82587	0.000126681	0.00152706	1.48912	Uba7	8	ubiquitin-like modifier activating enzyme 7	ENSG00000182179	UBA7	1	7318	3.8827	2.41212
ENSRNOG00000055259	1.43107	3.64836	6.82267	0.000127098	0.00152706	1.38913	Phldb3	1	pleckstrin homology-like domain, family B, member 3	ENSG00000176531	PHLDB3	1	653583	4.37187	2.92484
ENSRNOG00000011276	0.874988	3.9484	6.8241	0.000126912	0.00152706	1.33576	Tmem254	16	transmembrane protein 254	ENSG00000133678	TMEM254	1	80195	4.37098	3.52583
ENSRNOG00000039745	-2.85204	7.18395	-6.82268	0.000127097	0.00152706	1.13222	Pm20d1	13	peptidase M20 domain containing 1	ENSG00000162877	PM20D1	1	148811	5.81123	8.55667
ENSRNOG00000008345	-1.17024	6.32953	-6.82672	0.00012657	0.00152706	1.09161	Clcn6	5	chloride voltage-gated channel 6	ENSG00000011021	CLCN6	1	1185	5.8101	6.84896
ENSRNOG00000033206	-2.53957	8.1808	-6.82131	0.000127277	0.0015277	1.15601	Entpd5	6	ectonucleoside triphosphate diphosphohydrolase 5	ENSG00000187097	ENTPD5	1	957	6.97961	9.382
ENSRNOG00000007092	3.68924	2.06349	6.81922	0.00012755	0.00152795	1.63235	Fgb	2	fibrinogen beta chain	ENSG00000171564	FGB	1	2244	3.75261	0.374364
ENSRNOG00000002807	0.787826	5.99427	6.81936	0.000127532	0.00152795	1.07249	2009-09-01	10	septin 9	ENSG00000184640	SEPTIN9	1	10801	6.36244	5.6261
ENSRNOG00000007918	3.22585	2.27883	6.81227	0.000128466	0.00153266	1.60335	Tbxas1	4	thromboxane A synthase 1	ENSG00000059377	TBXAS1	1	6916	3.78751	0.770157
ENSRNOG00000008159	1.10458	3.17359	6.81145	0.000128574	0.00153266	1.46532	Msantd3	5	Myb/SANT DNA binding domain containing 3	ENSG00000066697	MSANTD3	1	91283	3.72788	2.6193
ENSRNOG00000019536	1.59777	3.42087	6.81355	0.000128297	0.00153266	1.43489	Smim3	18	small integral membrane protein 3	ENSG00000256235	SMIM3	1	85027	4.1468	2.69493
ENSRNOG00000026226	-1.34806	5.79852	-6.81299	0.00012837	0.00153266	1.11518	Hook1	5	hook microtubule-tethering protein 1	ENSG00000134709	HOOK1	1	51361	5.21442	6.38262
ENSRNOG00000018271	0.713402	5.57847	6.81186	0.000128519	0.00153266	1.08536	Scamp4	7	secretory carrier membrane protein 4	ENSG00000227500	SCAMP4	1	113178	5.90679	5.25016
ENSRNOG00000046050	2.43803	1.58785	6.8101	0.000128753	0.00153326	1.62706	Dennd1c	9	DENN/MADD domain containing 1C	ENSG00000205744	DENND1C	1	79958	2.87508	0.300616
ENSRNOG00000036859	1.68469	2.9661	6.80916	0.000128877	0.00153326	1.50219	Gdpd5	1	glycerophosphodiester phosphodiesterase domain containing 5	ENSG00000158555	GDPD5	1	81544	3.73054	2.20166
ENSRNOG00000017642	-0.900048	6.04805	-6.80658	0.000129221	0.00153584	1.0728	Acbd5	17	acyl-CoA binding domain containing 5	ENSG00000107897	ACBD5	1	91452	5.62348	6.47262
ENSRNOG00000042838	1.35737	6.42157	6.80464	0.000129479	0.00153741	1.07059	Junb	19	JunB proto-oncogene, AP-1 transcription factor subunit	ENSG00000171223	JUNB	1	3726	7.09242	5.75073
ENSRNOG00000011340	-0.708304	7.24978	-6.8021	0.000129819	0.00153993	1.07785	Ankrd13c	2	ankyrin repeat domain 13C	ENSG00000118454	ANKRD13C	1	81573	6.90559	7.59398
ENSRNOG00000014532	3.26036	3.60395	6.79538	0.00013072	0.00154459	1.43959	Lbp	3	lipopolysaccharide binding protein	ENSG00000129988	LBP	1	3929	5.21964	1.98826
ENSRNOG00000038258	-3.37425	5.54017	-6.79664	0.000130551	0.00154459	1.27032	Upb1	20	beta-ureidopropionase 1	ENSG00000100024	UPB1	1	51733	3.94455	7.13579
ENSRNOG00000013351	-1.01665	6.05629	-6.79539	0.00013072	0.00154459	1.06298	Stxbp5	1	syntaxin binding protein 5	ENSG00000164506	STXBP5	1	134957	5.60509	6.50748
ENSRNOG00000005411	-0.745979	6.61219	-6.7971	0.00013049	0.00154459	1.04664	Aftph	14	aftiphilin	ENSG00000119844	AFTPH	1	54812	6.26478	6.9596
ENSRNOG00000027739	-3.11773	5.96392	-6.79297	0.000131046	0.00154693	1.20566	Cndp1	18	carnosine dipeptidase 1	ENSG00000150656	CNDP1	1	84735	4.46209	7.46576
ENSRNOG00000000239	2.97731	0.307637	6.79185	0.000131197	0.00154721	1.53315	Ccl7	10	C-C motif chemokine ligand 7	ENSG00000108688	CCL7	1	6354	1.73954	-1.12426
ENSRNOG00000003203	-0.876041	6.86908	-6.78864	0.000131632	0.00155083	1.0452	Hexim1	10	hexamethylene bis-acetamide inducible 1	ENSG00000186834	HEXIM1	1	10614	6.45162	7.28654
ENSRNOG00000012665	-1.55987	3.81835	-6.78562	0.000132044	0.00155117	1.42204	Nmrk1	1	nicotinamide riboside kinase 1	ENSG00000106733	NMRK1	1	54981	3.10022	4.53647
ENSRNOG00000028781	-1.71319	4.15793	-6.78605	0.000131985	0.00155117	1.35935	Abcc6	1	ATP binding cassette subfamily C member 6	ENSG00000091262	ABCC6	1	368	3.39765	4.91821
ENSRNOG00000028781	-1.71319	4.15793	-6.78605	0.000131985	0.00155117	1.35935	Abcc6	1	ATP binding cassette subfamily C member 6	ENSG00000091262	ABCC6	1	105369239	3.39765	4.91821
ENSRNOG00000009050	-1.80865	6.03738	-6.78622	0.000131963	0.00155117	1.0907	Amn	6	amnion associated transmembrane protein	ENSG00000166126	AMN	1	81693	5.12131	6.95345
ENSRNOG00000031890	2.25202	3.4579	6.78432	0.00013222	0.00155174	1.4012	Ncam1	8	neural cell adhesion molecule 1	ENSG00000149294	NCAM1	1	4684	4.57675	2.33905
ENSRNOG00000010833	2.13228	1.94627	6.77815	0.000133066	0.00155283	1.58146	Mthfd2	4	methylenetetrahydrofolate dehydrogenase (NADP+ dependent) 2, methenyltetrahydrofolate cyclohydrolase	ENSG00000065911	MTHFD2	1	10797	2.98005	0.912487
ENSRNOG00000015411	2.81892	0.896676	6.77063	0.000134105	0.00155283	1.57376	Apobec1	4	apolipoprotein B mRNA editing enzyme catalytic subunit 1	ENSG00000111701	APOBEC1	1	339	2.25959	-0.46624
ENSRNOG00000011921	2.22723	3.05739	6.78072	0.000132713	0.00155283	1.46171	Dusp4	16	dual specificity phosphatase 4	ENSG00000120875	DUSP4	1	1846	4.16714	1.94764
ENSRNOG00000003288	-4.5501	5.51879	-6.78221	0.00013251	0.00155283	1.37911	Cacng5	10	calcium voltage-gated channel auxiliary subunit gamma 5	ENSG00000075429	CACNG5	1	27091	3.42064	7.61694
ENSRNOG00000028650	1.40339	3.83991	6.78129	0.000132636	0.00155283	1.31387	Inf2	6	inverted formin, FH2 and WH2 domain containing	ENSG00000203485	INF2	1	64423	4.47343	3.20639
ENSRNOG00000017020	1.48063	3.87551	6.77127	0.000134016	0.00155283	1.29662	Inpp5d	9	inositol polyphosphate-5-phosphatase D	ENSG00000168918	INPP5D	1	3635	4.60316	3.14786
ENSRNOG00000019424	-2.72573	5.0179	-6.77216	0.000133893	0.00155283	1.27246	Aspdh	1	aspartate dehydrogenase domain containing	ENSG00000204653	ASPDH	1	554235	3.71051	6.32528
ENSRNOG00000016975	-1.44526	5.00249	-6.77405	0.000133631	0.00155283	1.17592	Pxmp4	3	peroxisomal membrane protein 4	ENSG00000101417	PXMP4	1	11264	4.30366	5.70133
ENSRNOG00000048164	-1.06132	4.91513	-6.77245	0.000133852	0.00155283	1.17364	Acad8	8	acyl-CoA dehydrogenase family, member 8	ENSG00000151498	ACAD8	1	27034	4.40545	5.4248
ENSRNOG00000018215	-3.00404	8.28139	-6.77764	0.000133136	0.00155283	1.11987	Slc22a6	1	solute carrier family 22 member 6	ENSG00000197901	SLC22A6	1	9356	6.77388	9.7889
ENSRNOG00000050828	-0.718814	5.49695	-6.77523	0.000133468	0.00155283	1.07618	Vkorc1	1	vitamin K epoxide reductase complex, subunit 1	ENSG00000167397	VKORC1	1	79001	5.13379	5.8601
ENSRNOG00000015078	1.78397	5.54321	6.77161	0.000133969	0.00155283	1.0707	Ifitm3	1	interferon induced transmembrane protein 3	ENSG00000185885	IFITM1	0	8519	6.33324	4.75317
ENSRNOG00000015078	1.78397	5.54321	6.77161	0.000133969	0.00155283	1.0707	Ifitm3	1	interferon induced transmembrane protein 3	ENSG00000185201	IFITM2	0	10581	6.33324	4.75317
ENSRNOG00000015078	1.78397	5.54321	6.77161	0.000133969	0.00155283	1.0707	Ifitm3	1	interferon induced transmembrane protein 3	ENSG00000142089	IFITM3	1	10410	6.33324	4.75317
ENSRNOG00000018033	-1.49394	7.5252	-6.77317	0.000133753	0.00155283	1.05973	Ddx19a	19	DEAD-box helicase 19A	ENSG00000260537	AC012184.2	1	NA	6.81094	8.23945
ENSRNOG00000018033	-1.49394	7.5252	-6.77317	0.000133753	0.00155283	1.05973	Ddx19a	19	DEAD-box helicase 19A	ENSG00000157349	DDX19B	1	11269	6.81094	8.23945
ENSRNOG00000018033	-1.49394	7.5252	-6.77317	0.000133753	0.00155283	1.05973	Ddx19a	19	DEAD-box helicase 19A	ENSG00000168872	DDX19A	1	55308	6.81094	8.23945
ENSRNOG00000012787	0.73293	6.3017	6.77791	0.000133099	0.00155283	1.02276	Tmem164	X	transmembrane protein 164	ENSG00000157600	TMEM164	1	84187	6.64639	5.95701
ENSRNOG00000028236	1.9587	2.7519	6.76685	0.00013463	0.00155446	1.47616	RGD1309104	13	similar to RIKEN cDNA 1700025G04 gene	ENSG00000116667	C1orf21	1	81563	3.74125	1.76256
ENSRNOG00000029682	1.02472	7.81206	6.76707	0.000134599	0.00155446	1.09858	Clic1	20	chloride intracellular channel 1	ENSG00000213719	CLIC1	1	1192	8.28613	7.338
ENSRNOG00000009997	0.769451	5.8143	6.76691	0.000134622	0.00155446	1.02011	Erap1	2	endoplasmic reticulum aminopeptidase 1	ENSG00000164307	ERAP1	1	51752	6.18438	5.44422
ENSRNOG00000054142	-3.47175	3.62921	-6.76462	0.000134941	0.00155458	1.52274	Slc30a2	5	solute carrier family 30 member 2	ENSG00000158014	SLC30A2	1	7780	1.86139	5.39703
ENSRNOG00000022268	-2.30485	4.04326	-6.76402	0.000135025	0.00155458	1.40036	Pnpla3	7	patatin-like phospholipase domain containing 3	ENSG00000100344	PNPLA3	1	80339	3.02843	5.0581
ENSRNOG00000017291	-1.73309	8.8322	-6.76445	0.000134965	0.00155458	1.14054	Sord	3	sorbitol dehydrogenase	ENSG00000140263	SORD	1	6652	7.9307	9.7337
ENSRNOG00000003452	-1.70607	2.96995	-6.761	0.000135447	0.00155649	1.52	Asb9	X	ankyrin repeat and SOCS box-containing 9	ENSG00000102048	ASB9	1	140462	2.15921	3.7807
ENSRNOG00000007622	0.643473	5.32042	6.76155	0.00013537	0.00155649	1.05271	Arrdc1	3	arrestin domain containing 1	ENSG00000197070	ARRDC1	1	92714	5.63652	5.00431
ENSRNOG00000056836	0.898316	6.10333	6.75936	0.000135677	0.00155766	1.00587	Cav1	4	caveolin 1	ENSG00000105974	CAV1	1	857	6.50344	5.70322
ENSRNOG00000002246	-0.77145	6.04398	-6.75817	0.000135845	0.00155811	1.01311	Slc30a9	14	solute carrier family 30 member 9	ENSG00000014824	SLC30A9	1	10463	5.68887	6.39909
ENSRNOG00000019036	-1.68943	7.1624	-6.75577	0.000136183	0.00156051	1.02667	Ldhd	19	lactate dehydrogenase D	ENSG00000166816	LDHD	1	197257	6.28875	8.03605
ENSRNOG00000007254	1.57428	3.33223	6.74996	0.000137004	0.00156563	1.36845	Ttc9	6	tetratricopeptide repeat domain 9	ENSG00000133985	TTC9	1	23508	4.07568	2.58879
ENSRNOG00000027017	1.25253	3.6018	6.74932	0.000137096	0.00156563	1.31759	Rnasel	13	ribonuclease L	ENSG00000135828	RNASEL	1	6041	4.22943	2.97416
ENSRNOG00000029501	-1.62205	8.24353	-6.74897	0.000137146	0.00156563	1.07977	Hoga1	1	4-hydroxy-2-oxoglutarate aldolase 1	ENSG00000241935	HOGA1	1	112817	7.44463	9.04244
ENSRNOG00000019659	-2.44867	6.30419	-6.74902	0.000137139	0.00156563	1.07192	Aspa	10	aspartoacylase	ENSG00000108381	ASPA	1	443	5.14049	7.46788
ENSRNOG00000013916	-2.60274	4.32047	-6.74549	0.000137641	0.00156834	1.35426	Nefm	15	neurofilament medium	ENSG00000104722	NEFM	1	4741	3.17011	5.47084
ENSRNOG00000020904	1.04651	4.06479	6.74549	0.000137642	0.00156834	1.2285	Cdc42ep2	1	CDC42 effector protein 2	ENSG00000149798	CDC42EP2	1	10435	4.54309	3.58648
ENSRNOG00000024212	-0.782484	5.51143	-6.74317	0.000137973	0.00157065	1.03865	Papd5	19	poly(A) RNA polymerase D5, non-canonical	ENSG00000121274	TENT4B	1	64282	5.14981	5.87306
ENSRNOG00000000307	1.60199	3.04005	6.7409	0.000138298	0.00157286	1.41206	Mical1	20	microtubule associated monooxygenase, calponin and LIM domain containing 1	ENSG00000135596	MICAL1	1	64780	3.83812	2.24198
ENSRNOG00000012331	1.26556	3.56661	6.73624	0.000138969	0.00157902	1.31279	Casp8	9	caspase 8	ENSG00000064012	CASP8	1	841	4.20132	2.93191
ENSRNOG00000042029	2.09532	1.49074	6.73525	0.000139112	0.00157916	1.55421	Efs	15	embryonal Fyn-associated substrate	ENSG00000100842	EFS	1	10278	2.52259	0.458891
ENSRNOG00000011316	1.92425	1.78651	6.72859	0.000140077	0.00158087	1.54199	Fam167a	15	family with sequence similarity 167, member A	ENSG00000154319	FAM167A	1	83648	2.76605	0.806973
ENSRNOG00000017803	2.3317	2.09487	6.73089	0.000139743	0.00158087	1.52541	Apbb1ip	17	amyloid beta precursor protein binding family B member 1 interacting protein	ENSG00000077420	APBB1IP	1	54518	3.2133	0.976439
ENSRNOG00000025350	1.11015	3.37141	6.72982	0.000139898	0.00158087	1.3417	Ppp1r13l	1	protein phosphatase 1, regulatory subunit 13 like	ENSG00000104881	PPP1R13L	1	10848	3.93963	2.80319
ENSRNOG00000017693	-2.71299	4.89943	-6.72535	0.000140548	0.00158087	1.24459	Slc2a5	5	solute carrier family 2 member 5	ENSG00000142583	SLC2A5	1	6518	3.63058	6.16829
ENSRNOG00000019080	1.3202	4.10421	6.72825	0.000140126	0.00158087	1.2036	Hsd3b7	1	hydroxy-delta-5-steroid dehydrogenase, 3 beta- and steroid delta-isomerase 7	ENSG00000099377	HSD3B7	1	80270	4.72805	3.48037
ENSRNOG00000006893	-2.78853	5.63452	-6.72928	0.000139977	0.00158087	1.13813	Ppm1k	4	protein phosphatase, Mg2+/Mn2+ dependent, 1K	ENSG00000163644	PPM1K	1	152926	4.34739	6.92165
ENSRNOG00000013484	-2.40184	8.87526	-6.72594	0.000140463	0.00158087	1.09982	Gsta1	9	glutathione S-transferase alpha 1	ENSG00000182793	GSTA5	1	221357	7.64207	10.1085
ENSRNOG00000004085	-1.68418	5.5354	-6.72434	0.000140696	0.00158087	1.06463	Tcaim	8	T cell activation inhibitor, mitochondrial	ENSG00000179152	TCAIM	1	285343	4.74587	6.32494
ENSRNOG00000026501	-1.87217	6.06019	-6.72489	0.000140616	0.00158087	1.01942	Slc6a19	1	solute carrier family 6 member 19	ENSG00000174358	SLC6A19	1	340024	5.05357	7.06681
ENSRNOG00000007069	-1.71152	6.48629	-6.72806	0.000140153	0.00158087	0.997284	Adhfe1	5	alcohol dehydrogenase, iron containing, 1	ENSG00000147576	ADHFE1	1	137872	5.64337	7.32921
ENSRNOG00000007069	-1.71152	6.48629	-6.72806	0.000140153	0.00158087	0.997284	Adhfe1	5	alcohol dehydrogenase, iron containing, 1	ENSG00000285791	AC009879.3	0	NA	5.64337	7.32921
ENSRNOG00000007069	-1.71152	6.48629	-6.72806	0.000140153	0.00158087	0.997284	Adhfe1	5	alcohol dehydrogenase, iron containing, 1	ENSG00000285655	AC009879.2	0	NA	5.64337	7.32921
ENSRNOG00000018391	-0.707321	6.13354	-6.72496	0.000140606	0.00158087	0.970465	Cdk2ap2	1	cyclin-dependent kinase 2 associated protein 2	ENSG00000167797	CDK2AP2	1	10263	5.75979	6.5073
ENSRNOG00000058909	0.874592	8.53318	6.71999	0.000141334	0.00158657	1.09514	Rps9	1	ribosomal protein S9	ENSG00000170889	RPS9	1	6203	8.94262	8.12374
ENSRNOG00000059903	2.53078	1.55368	6.71686	0.000141795	0.00158735	1.53535	Thbs3	2	thrombospondin 3	ENSG00000169231	THBS3	1	7059	2.72839	0.378965
ENSRNOG00000018122	1.76225	1.5407	6.71772	0.000141668	0.00158735	1.53497	Tspan17	17	tetraspanin 17	ENSG00000048140	TSPAN17	1	26262	2.40959	0.671812
ENSRNOG00000015948	1.03589	5.25928	6.7175	0.0001417	0.00158735	1.01145	Slc1a5	1	solute carrier family 1 member 5	ENSG00000105281	SLC1A5	1	6510	5.74305	4.77551
ENSRNOG00000004249	2.07436	1.30593	6.71243	0.000142449	0.00158881	1.53106	Tlr7	X	toll-like receptor 7	ENSG00000196664	TLR7	1	51284	2.30797	0.303887
ENSRNOG00000051450	0.899745	5.13657	6.7134	0.000142307	0.00158881	1.01938	Abracl	1	ABRA C-terminal like	ENSG00000146386	ABRACL	1	58527	5.55373	4.7194
ENSRNOG00000060956	-0.800863	7.72999	-6.71355	0.000142284	0.00158881	1.00949	Zfp706	7	zinc finger protein 706	ENSG00000120963	ZNF706	1	51123	7.31877	8.14121
ENSRNOG00000011222	1.03514	5.96986	6.7126	0.000142425	0.00158881	0.959149	Dynll1	12	dynein light chain LC8-type 1	ENSG00000088986	DYNLL1	1	8655	6.42634	5.51338
ENSRNOG00000000042	-0.971471	4.46546	-6.71115	0.00014264	0.00158947	1.1697	Xpr1	13	xenotropic and polytropic retrovirus receptor 1	ENSG00000143324	XPR1	1	9213	3.99076	4.94016
ENSRNOG00000001752	1.88081	3.26756	6.70848	0.000143036	0.00159243	1.3499	Nrros	11	negative regulator of reactive oxygen species	ENSG00000174004	NRROS	1	375387	4.15912	2.376
ENSRNOG00000014035	1.66706	1.60531	6.70503	0.000143552	0.00159344	1.52044	Arhgef4	9	Rho guanine nucleotide exchange factor 4	ENSG00000136002	ARHGEF4	1	50649	2.46096	0.749665
ENSRNOG00000012460	1.69407	2.94304	6.70642	0.000143344	0.00159344	1.39513	Cntf	1	ciliary neurotrophic factor	ENSG00000242689	CNTF	1	1270	3.75763	2.12845
ENSRNOG00000002843	4.50281	-1.18722	6.70311	0.000143838	0.00159344	1.28809	Cxcl6	14	C-X-C motif chemokine ligand 6	ENSG00000124875	CXCL6	1	6372	1.03202	-3.40647
ENSRNOG00000002418	2.27863	3.75513	6.70371	0.000143749	0.00159344	1.27608	Tgfb2	13	transforming growth factor, beta 2	ENSG00000092969	TGFB2	1	7042	4.7725	2.73776
ENSRNOG00000027175	1.1929	4.31807	6.7026	0.000143915	0.00159344	1.13405	Cnpy4	12	canopy FGF signaling regulator 4	ENSG00000166997	CNPY4	1	245812	4.84524	3.79091
ENSRNOG00000004298	-2.65907	6.06513	-6.70556	0.000143473	0.00159344	1.05637	Dpys	7	dihydropyrimidinase	ENSG00000147647	DPYS	1	1807	4.75955	7.3707
ENSRNOG00000003357	3.47192	7.30624	6.70125	0.000144118	0.0015938	1.05971	Col3a1	9	collagen type III alpha 1 chain	ENSG00000168542	COL3A1	1	1281	8.86033	5.75214
ENSRNOG00000016980	-2.16965	5.92726	-6.70063	0.00014421	0.0015938	1.02824	Qprt	1	quinolinate phosphoribosyltransferase	ENSG00000103485	QPRT	1	23475	4.87775	6.97677
ENSRNOG00000016980	-2.16965	5.92726	-6.70063	0.00014421	0.0015938	1.02824	Qprt	1	quinolinate phosphoribosyltransferase	ENSG00000103485	QPRT	1	105369247	4.87775	6.97677
ENSRNOG00000011702	3.63655	-1.55064	6.69843	0.000144542	0.00159601	1.22129	Foxp3	X	forkhead box P3	ENSG00000049768	FOXP3	1	50943	0.40331	-3.50458
ENSRNOG00000004033	-1.42393	5.43062	-6.69623	0.000144874	0.00159822	1.03372	Sema6a	18	semaphorin 6A	ENSG00000092421	SEMA6A	1	57556	4.792	6.06925
ENSRNOG00000012865	0.97767	5.24241	6.69092	0.000145678	0.00160563	0.980584	Parp3	8	poly (ADP-ribose) polymerase family, member 3	ENSG00000041880	PARP3	1	10039	5.69653	4.78829
ENSRNOG00000017704	1.36242	4.61759	6.68905	0.000145963	0.00160732	1.06666	Sema3f	8	semaphorin 3F	ENSG00000001617	SEMA3F	1	6405	5.26339	3.97179
ENSRNOG00000008246	1.37061	6.37046	6.6859	0.000146443	0.00161114	0.937613	Emilin1	6	elastin microfibril interfacer 1	ENSG00000138080	EMILIN1	1	11117	7.00939	5.73153
ENSRNOG00000006244	-1.09633	4.81028	-6.68406	0.000146725	0.00161156	1.0869	Lztfl1	8	leucine zipper transcription factor-like 1	ENSG00000163818	LZTFL1	1	54585	4.26683	5.35373
ENSRNOG00000010895	-0.650379	6.56402	-6.68392	0.000146747	0.00161156	0.917355	Tmem30a	8	transmembrane protein 30A	ENSG00000112697	TMEM30A	1	55754	6.23745	6.89059
ENSRNOG00000009170	-1.95133	5.24714	-6.68024	0.000147311	0.00161629	1.06739	Dmxl2	8	Dmx-like 2	ENSG00000104093	DMXL2	1	23312	4.40306	6.09121
ENSRNOG00000022767	-3.18374	2.80472	-6.67452	0.000148194	0.00162012	1.48939	Elfn1	12	extracellular leucine-rich repeat and fibronectin type III domain containing 1	ENSG00000225968	ELFN1	1	392617	1.33999	4.26944
ENSRNOG00000016294	2.3844	4.21335	6.67498	0.000148122	0.00162012	1.16195	Cd4	4	Cd4 molecule	ENSG00000010610	CD4	1	920	5.28306	3.14365
ENSRNOG00000029549	-1.93919	8.51638	-6.67689	0.000147827	0.00162012	1.01761	Eci2	17	enoyl-CoA delta isomerase 2	ENSG00000198721	ECI2	1	10455	7.53821	9.49455
ENSRNOG00000001285	-0.774309	8.37804	-6.67484	0.000148144	0.00162012	1.01358	Atp2a2	12	ATPase sarcoplasmic/endoplasmic reticulum Ca2+ transporting 2	ENSG00000174437	ATP2A2	1	488	7.99877	8.75731
ENSRNOG00000000967	0.908229	4.01328	6.66751	0.000149284	0.00163056	1.14372	Aacs	12	acetoacetyl-CoA synthetase	ENSG00000081760	AACS	1	65985	4.48217	3.5444
ENSRNOG00000002701	-2.81527	7.14994	-6.66642	0.000149454	0.00163096	0.956112	Hgd	11	homogentisate 1, 2-dioxygenase	ENSG00000113924	HGD	1	3081	5.79818	8.50169
ENSRNOG00000022623	0.855378	4.3853	6.66464	0.000149733	0.00163106	1.08322	Ttll12	7	tubulin tyrosine ligase like 12	ENSG00000100304	TTLL12	1	23170	4.80446	3.96613
ENSRNOG00000019222	0.752714	5.16092	6.66479	0.000149709	0.00163106	0.961541	Tfdp1	16	transcription factor Dp-1	ENSG00000198176	TFDP1	1	7027	5.54253	4.77931
ENSRNOG00000002711	2.84743	0.324853	6.65689	0.000150951	0.00164139	1.4228	Nuf2	13	NUF2, NDC80 kinetochore complex component	ENSG00000143228	NUF2	1	83540	1.83231	-1.18261
ENSRNOG00000024818	1.11255	4.62429	6.65727	0.000150892	0.00164139	1.03036	Eva1b	5	eva-1 homolog B	ENSG00000142694	EVA1B	1	55194	5.11673	4.13184
ENSRNOG00000013140	-1.58759	4.54326	-6.65141	0.00015182	0.00164642	1.12228	Pdzd2	2	PDZ domain containing 2	ENSG00000133401	PDZD2	1	23037	3.84426	5.24226
ENSRNOG00000010897	0.762378	5.04712	6.65207	0.000151715	0.00164642	0.961274	Nek6	3	NIMA-related kinase 6	ENSG00000119408	NEK6	1	10783	5.41127	4.68297
ENSRNOG00000002208	1.05022	5.38975	6.65257	0.000151636	0.00164642	0.92111	Shroom3	14	shroom family member 3	ENSG00000138771	SHROOM3	1	57619	5.95909	4.82042
ENSRNOG00000008855	-2.9442	5.82191	-6.65008	0.000152031	0.00164723	1.03843	Gjb2	15	gap junction protein, beta 2	ENSG00000165474	GJB2	1	2706	4.41881	7.22501
ENSRNOG00000007378	-2.0134	2.7164	-6.64766	0.000152418	0.00164995	1.43436	Acox2	15	acyl-CoA oxidase 2	ENSG00000168306	ACOX2	1	8309	1.79727	3.63553
ENSRNOG00000008988	-2.62256	6.53728	-6.64342	0.000153096	0.00165581	0.9434	Cyp2d2	7	cytochrome P450, family 2, subfamily d, polypeptide 2	ENSG00000205702	CYP2D7	1	1564	5.20232	7.87224
ENSRNOG00000008988	-2.62256	6.53728	-6.64342	0.000153096	0.00165581	0.9434	Cyp2d2	7	cytochrome P450, family 2, subfamily d, polypeptide 2	ENSG00000100197	CYP2D6	1	1565	5.20232	7.87224
ENSRNOG00000008988	-2.62256	6.53728	-6.64342	0.000153096	0.00165581	0.9434	Cyp2d2	7	cytochrome P450, family 2, subfamily d, polypeptide 2	ENSG00000100197	CYP2D6	1	107987478	5.20232	7.87224
ENSRNOG00000008988	-2.62256	6.53728	-6.64342	0.000153096	0.00165581	0.9434	Cyp2d2	7	cytochrome P450, family 2, subfamily d, polypeptide 2	ENSG00000100197	CYP2D6	1	107987479	5.20232	7.87224
ENSRNOG00000045992	1.99846	1.10136	6.63592	0.000154306	0.00165934	1.45142	Tlr8	X	toll-like receptor 8	ENSG00000101916	TLR8	1	51311	2.08885	0.113873
ENSRNOG00000021628	-1.28571	3.53493	-6.63835	0.000153913	0.00165934	1.29195	Wdr89	6	WD repeat domain 89	ENSG00000140006	WDR89	1	112840	2.9192	4.15065
ENSRNOG00000046864	-1.73558	4.1792	-6.63575	0.000154333	0.00165934	1.1925	Acot4	6	acyl-CoA thioesterase 4	ENSG00000177465	ACOT4	1	122970	3.30349	5.0549
ENSRNOG00000014571	0.900034	4.99003	6.63546	0.00015438	0.00165934	0.948747	Dbndd2	3	dysbindin domain containing 2	ENSG00000244274	DBNDD2	1	55861	5.40247	4.5776
ENSRNOG00000003890	0.808048	6.91339	6.63733	0.000154078	0.00165934	0.887105	Nap1l1	7	nucleosome assembly protein 1-like 1	ENSG00000187109	NAP1L1	1	4673	7.29832	6.52846
ENSRNOG00000011504	-1.24216	6.80439	-6.63875	0.000153847	0.00165934	0.881583	Akap2	5	A-kinase anchoring protein 2	ENSG00000157654	PALM2AKAP2	1	445815	6.22877	7.38002
ENSRNOG00000037984	-0.79948	6.47055	-6.63674	0.000154174	0.00165934	0.865508	Sccpdh	13	saccharopine dehydrogenase (putative)	ENSG00000143653	SCCPDH	1	51097	6.07558	6.86553
ENSRNOG00000021100	2.29521	2.65575	6.63344	0.000154707	0.00165992	1.363	Tnfaip8l2	2	TNF alpha induced protein 8 like 2	ENSG00000163154	TNFAIP8L2	1	79626	3.67294	1.63857
ENSRNOG00000008989	-1.86327	7.46998	-6.6341	0.0001546	0.00165992	0.902932	Cryl1	15	crystallin, lambda 1	ENSG00000165475	CRYL1	1	51084	6.50348	8.43647
ENSRNOG00000021104	2.03278	3.06426	6.62962	0.000155329	0.00166366	1.29278	Emp3	1	epithelial membrane protein 3	ENSG00000142227	EMP3	1	2014	3.98712	2.14141
ENSRNOG00000013594	-0.893656	6.09364	-6.62987	0.000155289	0.00166366	0.870921	Acp2	3	acid phosphatase 2, lysosomal	ENSG00000134575	ACP2	1	53	5.63441	6.55288
ENSRNOG00000016558	-0.828988	6.40394	-6.62817	0.000155565	0.00166471	0.857207	Pllp	19	plasmolipin	ENSG00000102934	PLLP	1	51090	5.97626	6.83163
ENSRNOG00000049115	2.00355	2.73977	6.62719	0.000155726	0.00166497	1.3347	Ccr5	8	chemokine (C-C motif) receptor 5	ENSG00000160791	CCR5	1	1234	3.66822	1.81132
ENSRNOG00000038686	1.32884	2.60863	6.62578	0.000155958	0.00166598	1.35219	Ap1s2	X	adaptor-related protein complex 1, sigma 2 subunit	ENSG00000182287	AP1S2	1	8905	3.2765	1.94075
ENSRNOG00000008245	2.72404	1.32186	6.61511	0.000157716	0.00168327	1.43308	Ptgis	3	prostaglandin I2 synthase	ENSG00000124212	PTGIS	1	5740	2.59618	0.0475383
ENSRNOG00000020030	5.50656	1.48963	6.6125	0.000158149	0.00168375	1.41212	Crlf1	16	cytokine receptor-like factor 1	ENSG00000006016	CRLF1	1	9244	4.12721	-1.14794
ENSRNOG00000052668	-4.39547	-1.61717	-6.61234	0.000158176	0.00168375	0.983357	Tcf24	5	transcription factor 24	ENSG00000261787	TCF24	1	100129654	-3.90433	0.669987
ENSRNOG00000034026	-0.954141	5.08568	-6.6124	0.000158166	0.00168375	0.956083	Lclat1	6	lysocardiolipin acyltransferase 1	ENSG00000172954	LCLAT1	1	253558	4.64838	5.52299
ENSRNOG00000053272	3.36756	0.680332	6.61064	0.000158459	0.00168528	1.38195	Chi3l1	13	chitinase 3 like 1	ENSG00000133048	CHI3L1	1	1116	2.18985	-0.829184
ENSRNOG00000020884	2.05874	2.31742	6.60673	0.000159112	0.00169074	1.36707	Cd6	1	Cd6 molecule	ENSG00000013725	CD6	1	923	3.28137	1.35347
ENSRNOG00000015514	4.36175	1.84507	6.60004	0.000160237	0.00169557	1.41587	Bcat1	4	branched chain amino acid transaminase 1	ENSG00000060982	BCAT1	1	586	4.05803	-0.367897
ENSRNOG00000014312	2.73431	1.70231	6.59843	0.000160509	0.00169557	1.41236	Trbc2	4	T cell receptor beta, constant 2	ENSG00000211772	TRBC2	1	NA	2.94028	0.46435
ENSRNOG00000014312	2.73431	1.70231	6.59843	0.000160509	0.00169557	1.41236	Trbc2	4	T cell receptor beta, constant 2	ENSG00000211751	TRBC1	0	NA	2.94028	0.46435
ENSRNOG00000008600	1.82621	1.90063	6.59822	0.000160545	0.00169557	1.39523	Sytl1	5	synaptotagmin-like 1	ENSG00000142765	SYTL1	1	84958	2.82961	0.971653
ENSRNOG00000002540	2.48375	0.678069	6.60233	0.000159851	0.00169557	1.39395	Rhoh	14	ras homolog family member H	ENSG00000168421	RHOH	1	399	1.88393	-0.527789
ENSRNOG00000027787	2.48128	0.105419	6.59998	0.000160247	0.00169557	1.33231	Cdc6	10	cell division cycle 6	ENSG00000094804	CDC6	1	990	1.33962	-1.12878
ENSRNOG00000036692	-1.91317	3.95744	-6.59927	0.000160368	0.00169557	1.21446	Gcgr	10	glucagon receptor	ENSG00000215644	GCGR	1	2642	3.0853	4.82957
ENSRNOG00000017821	-1.65958	9.59614	-6.6003	0.000160193	0.00169557	1.01349	Agxt2	2	alanine-glyoxylate aminotransferase 2	ENSG00000113492	AGXT2	1	64902	8.79032	10.402
ENSRNOG00000042353	1.34211	2.90537	6.59393	0.000161272	0.00170177	1.27043	Mlkl	19	mixed lineage kinase domain like pseudokinase	ENSG00000168404	MLKL	1	197259	3.59561	2.21513
ENSRNOG00000008063	-1.36751	7.80308	-6.59236	0.00016154	0.00170312	0.873284	Hibadh	4	3-hydroxyisobutyrate dehydrogenase	ENSG00000106049	HIBADH	1	11112	7.105	8.50117
ENSRNOG00000013659	-1.05433	6.8413	-6.59152	0.000161683	0.00170314	0.823837	Tex2	10	testis expressed 2	ENSG00000136478	TEX2	1	55852	6.33839	7.3442
ENSRNOG00000001843	-1.79859	4.9413	-6.58936	0.000162052	0.00170555	1.006	Bcl6	11	B-cell CLL/lymphoma 6	ENSG00000113916	BCL6	1	604	4.12616	5.75644
ENSRNOG00000019656	-0.90576	5.81507	-6.58649	0.000162543	0.00170924	0.840497	Btd	16	biotinidase	ENSG00000169814	BTD	1	686	5.34961	6.28052
ENSRNOG00000032745	-2.35575	7.15345	-6.58424	0.00016293	0.00171118	0.846957	Slc17a3	17	solute carrier family 17 member 3	ENSG00000124564	SLC17A3	1	10786	6.05367	8.25323
ENSRNOG00000058780	1.26018	5.54175	6.58377	0.00016301	0.00171118	0.836885	Igfbp1	14	insulin-like growth factor binding protein 1	ENSG00000146678	IGFBP1	1	3484	6.13422	4.94927
ENSRNOG00000003650	1.16644	3.09278	6.58006	0.000163649	0.00171641	1.21943	Nt5c	10	5', 3'-nucleotidase, cytosolic	ENSG00000125458	NT5C	1	30833	3.68356	2.502
ENSRNOG00000046168	1.01574	4.71836	6.57351	0.000164785	0.00172683	0.913692	Ppm1l	2	protein phosphatase, Mg2+/Mn2+ dependent, 1L	ENSG00000163590	PPM1L	1	151742	5.25051	4.1862
ENSRNOG00000046181	-1.5516	5.64397	-6.56851	0.000165657	0.00173447	0.865261	Anks4b	1	ankyrin repeat and sterile alpha motif domain containing 4B	ENSG00000175311	ANKS4B	1	257629	4.88699	6.40095
ENSRNOG00000056894	-1.54535	5.2347	-6.56156	0.000166881	0.00174577	0.916227	St6galnac3	2	ST6 N-acetylgalactosaminide alpha-2,6-sialyltransferase 3	ENSG00000184005	ST6GALNAC3	1	256435	4.48697	5.98242
ENSRNOG00000049560	-1.36806	10.5787	-6.55918	0.000167301	0.00174716	1.04161	Glul	13	glutamate-ammonia ligase	ENSG00000135821	GLUL	1	2752	9.87577	11.2816
ENSRNOG00000028319	-2.33131	8.895	-6.5595	0.000167244	0.00174716	0.911436	Cryz	2	crystallin zeta	ENSG00000116791	CRYZ	1	1429	7.75131	10.0387
ENSRNOG00000057862	1.73132	2.42377	6.55692	0.000167702	0.00174788	1.30089	Rsph1	20	radial spoke head 1 homolog	ENSG00000160188	RSPH1	1	89765	3.21954	1.62801
ENSRNOG00000013215	1.09687	3.13224	6.55766	0.000167569	0.00174788	1.19227	Dctd	16	dCMP deaminase	ENSG00000129187	DCTD	1	1635	3.71025	2.55423
ENSRNOG00000002294	-1.476	5.20875	-6.55635	0.000167803	0.00174788	0.895732	Snx29	10	sorting nexin 29	ENSG00000048471	SNX29	1	92017	4.55741	5.86009
ENSRNOG00000017396	-0.836074	6.30588	-6.55438	0.000168153	0.00175003	0.774508	2005-03-01	1	membrane associated ring-CH-type finger 5	ENSG00000198060	MARCHF5	1	54708	5.89491	6.71686
ENSRNOG00000007597	-1.19414	6.60315	-6.55131	0.0001687	0.00175422	0.77692	Rhpn1	7	rhophilin, Rho GTPase binding protein 1	ENSG00000158106	RHPN1	1	114822	6.0344	7.1719
ENSRNOG00000013578	5.3572	0.734196	6.54714	0.000169447	0.00176048	1.31039	Trem2	9	triggering receptor expressed on myeloid cells 2	ENSG00000095970	TREM2	1	54209	3.42035	-1.95196
ENSRNOG00000060269	-4.95298	-0.186264	-6.54408	0.000169998	0.00176168	0.998143	Vwce	1	von Willebrand factor C and EGF domains	ENSG00000167992	VWCE	1	220001	-2.75904	2.38651
ENSRNOG00000012295	-0.97257	5.432	-6.54461	0.000169902	0.00176168	0.836147	Pla2g6	7	phospholipase A2 group VI	ENSG00000184381	PLA2G6	1	8398	4.95351	5.9105
ENSRNOG00000020776	-1.34586	5.72985	-6.54472	0.000169882	0.00176168	0.82074	Dhcr7	1	7-dehydrocholesterol reductase	ENSG00000172893	DHCR7	1	1717	5.08054	6.37917
ENSRNOG00000014966	-0.704356	5.36991	-6.54125	0.000170508	0.00176545	0.825532	LOC690000	1	similar to CG3740-PA	ENSG00000131943	C19orf12	1	83636	5.02372	5.71609
ENSRNOG00000010646	1.63075	3.1715	6.53891	0.000170932	0.00176769	1.17192	Tmem229b	6	transmembrane protein 229B	ENSG00000198133	TMEM229B	1	161145	3.92021	2.42279
ENSRNOG00000018239	-1.0905	7.47969	-6.53845	0.000171015	0.00176769	0.791083	Dhrs4	15	dehydrogenase/reductase 4	ENSG00000187630	DHRS4L2	1	317749	6.91285	8.04653
ENSRNOG00000018239	-1.0905	7.47969	-6.53845	0.000171015	0.00176769	0.791083	Dhrs4	15	dehydrogenase/reductase 4	ENSG00000157326	DHRS4	1	10901	6.91285	8.04653
ENSRNOG00000018239	-1.0905	7.47969	-6.53845	0.000171015	0.00176769	0.791083	Dhrs4	15	dehydrogenase/reductase 4	ENSG00000157326	DHRS4	1	728635	6.91285	8.04653
ENSRNOG00000015233	-0.954346	8.23434	-6.53716	0.000171249	0.0017686	0.842781	Etfa	8	electron transfer flavoprotein alpha subunit	ENSG00000140374	ETFA	1	2108	7.7342	8.73448
ENSRNOG00000016831	1.37071	7.87412	6.53211	0.000172169	0.00177508	0.841389	Serpinh1	1	serpin family H member 1	ENSG00000149257	SERPINH1	1	871	8.47994	7.2683
ENSRNOG00000003428	-1.3134	6.11505	-6.53284	0.000172036	0.00177508	0.774845	Rufy3	14	RUN and FYVE domain containing 3	ENSG00000018189	RUFY3	1	22902	5.54172	6.68837
ENSRNOG00000025608	2.39114	1.68449	6.52169	0.000174086	0.00177908	1.32941	Lrat	2	lecithin-retinol acyltransferase (phosphatidylcholine-retinol-O-acyltransferase)	ENSG00000121207	LRAT	1	9227	2.80845	0.56052
ENSRNOG00000020970	2.61893	2.01392	6.52082	0.000174246	0.00177908	1.3118	Rundc3a	10	RUN domain containing 3A	ENSG00000108309	RUNDC3A	1	10900	3.22364	0.804193
ENSRNOG00000001270	4.08978	0.809595	6.52604	0.000173282	0.00177908	1.30526	Hvcn1	12	hydrogen voltage-gated channel 1	ENSG00000122986	HVCN1	1	84329	2.6028	-0.983615
ENSRNOG00000008754	-1.78214	2.939	-6.526	0.00017329	0.00177908	1.27518	Flvcr2	6	feline leukemia virus subgroup C cellular receptor family, member 2	ENSG00000119686	FLVCR2	1	55640	2.1323	3.74571
ENSRNOG00000036659	-2.47648	3.38629	-6.52833	0.000172862	0.00177908	1.24968	Fn3k	10	fructosamine 3 kinase	ENSG00000167363	FN3K	1	64122	2.15161	4.62098
ENSRNOG00000001470	1.20576	3.44885	6.52048	0.000174308	0.00177908	1.0962	Limk1	12	LIM domain kinase 1	ENSG00000106683	LIMK1	1	3984	4.04989	2.84781
ENSRNOG00000002159	-1.26841	5.28926	-6.52274	0.000173891	0.00177908	0.843492	Gpat3	14	glycerol-3-phosphate acyltransferase 3	ENSG00000138678	GPAT3	1	84803	4.69149	5.88703
ENSRNOG00000016286	-2.62985	6.19282	-6.52087	0.000174237	0.00177908	0.830614	Iyd	1	iodotyrosine deiodinase	ENSG00000009765	IYD	1	389434	4.89789	7.48775
ENSRNOG00000017260	-1.07211	5.39693	-6.52246	0.000173942	0.00177908	0.821603	Cdr2	1	cerebellar degeneration-related protein 2	ENSG00000140743	CDR2	1	1039	4.88337	5.91048
ENSRNOG00000017260	-1.07211	5.39693	-6.52246	0.000173942	0.00177908	0.821603	Cdr2	1	cerebellar degeneration-related protein 2	ENSG00000140743	CDR2	1	101060399	4.88337	5.91048
ENSRNOG00000014254	-0.813539	8.0519	-6.52236	0.000173961	0.00177908	0.814611	Cpt1a	1	carnitine palmitoyltransferase 1A	ENSG00000110090	CPT1A	1	1374	7.6637	8.44009
ENSRNOG00000010128	-2.26285	7.97759	-6.52044	0.000174316	0.00177908	0.804264	Slc27a2	3	solute carrier family 27 member 2	ENSG00000140284	SLC27A2	1	11001	6.84906	9.10611
ENSRNOG00000013876	-0.919892	5.67294	-6.52333	0.000173781	0.00177908	0.779879	Mipep	15	mitochondrial intermediate peptidase	ENSG00000027001	MIPEP	1	4285	5.20712	6.13877
ENSRNOG00000021724	2.79889	2.08803	6.5165	0.000175048	0.0017849	1.30522	Ptprcap	1	protein tyrosine phosphatase, receptor type, C-associated protein	ENSG00000213402	PTPRCAP	1	5790	3.42981	0.746248
ENSRNOG00000017078	1.27345	4.60958	6.51579	0.00017518	0.0017849	0.873374	Selenon	5	selenoprotein N	ENSG00000162430	SELENON	1	57190	5.17684	4.04232
ENSRNOG00000017078	1.27345	4.60958	6.51579	0.00017518	0.0017849	0.873374	Selenon	5	selenoprotein N	ENSG00000255054	AL020996.2	0	NA	5.17684	4.04232
ENSRNOG00000010649	3.15928	-0.0221044	6.51298	0.000175704	0.00178723	1.23279	Ctnnd2	2	catenin delta 2	ENSG00000169862	CTNND2	1	1501	1.57179	-1.616
ENSRNOG00000060538	0.784957	7.22603	6.51332	0.00017564	0.00178723	0.764914	Cdc42se1	2	CDC42 small effector 1	ENSG00000197622	CDC42SE1	1	56882	7.59026	6.8618
ENSRNOG00000017359	1.01118	8.79948	6.51045	0.000176177	0.00179054	0.878278	Itm2c	9	integral membrane protein 2C	ENSG00000135916	ITM2C	1	81618	9.25629	8.34267
ENSRNOG00000019458	-0.844343	4.73427	-6.50824	0.000176593	0.00179326	0.888813	Shpk	10	sedoheptulokinase	ENSG00000197417	SHPK	1	23729	4.30858	5.15996
ENSRNOG00000019458	-0.844343	4.73427	-6.50824	0.000176593	0.00179326	0.888813	Shpk	10	sedoheptulokinase	ENSG00000262304	AC027796.3	1	NA	4.30858	5.15996
ENSRNOG00000021031	0.799508	8.0655	6.50743	0.000176745	0.00179331	0.818622	Grn	10	granulin precursor	ENSG00000030582	GRN	1	2896	8.43897	7.69203
ENSRNOG00000010275	1.89359	1.03909	6.50363	0.00017746	0.00179612	1.31632	Slc17a9	3	solute carrier family 17 member 9	ENSG00000101194	SLC17A9	1	63910	1.9531	0.125077
ENSRNOG00000004279	-0.938609	5.96098	-6.50282	0.000177614	0.00179612	0.733655	Adgra3	14	adhesion G protein-coupled receptor A3	ENSG00000152990	ADGRA3	1	166647	5.54397	6.37799
ENSRNOG00000030667	-0.771349	7.05216	-6.5033	0.000177523	0.00179612	0.728061	Ppm1b	6	protein phosphatase, Mg2+/Mn2+ dependent, 1B	ENSG00000285542	AC013717.1	1	NA	6.68492	7.4194
ENSRNOG00000030667	-0.771349	7.05216	-6.5033	0.000177523	0.00179612	0.728061	Ppm1b	6	protein phosphatase, Mg2+/Mn2+ dependent, 1B	ENSG00000138032	PPM1B	1	5495	6.68492	7.4194
ENSRNOG00000013763	-0.727066	6.45343	-6.50301	0.000177578	0.00179612	0.711026	Erlin2	16	ER lipid raft associated 2	ENSG00000147475	ERLIN2	1	11160	6.10868	6.79818
ENSRNOG00000007142	-2.93566	2.16365	-6.49683	0.000178751	0.00180612	1.31334	B3gat1	8	beta-1,3-glucuronyltransferase 1	ENSG00000109956	B3GAT1	1	27087	0.857288	3.47001
ENSRNOG00000015866	-0.98467	7.00944	-6.49273	0.000179533	0.00181251	0.714568	Hint2	5	histidine triad nucleotide binding protein 2	ENSG00000137133	HINT2	1	84681	6.48442	7.53445
ENSRNOG00000015733	0.696778	7.48009	6.4918	0.000179711	0.0018128	0.755986	Myl12b	9	myosin light chain 12B	ENSG00000118680	MYL12B	1	103910	7.81452	7.14566
ENSRNOG00000020922	-0.975532	4.56046	-6.48959	0.000180135	0.00181483	0.904223	Hspb6	1	heat shock protein family B (small) member 6	ENSG00000004776	HSPB6	1	126393	4.07423	5.04668
ENSRNOG00000020430	-0.688454	5.95067	-6.48919	0.000180212	0.00181483	0.708967	Wdr11	1	WD repeat domain 11	ENSG00000120008	WDR11	1	55717	5.62221	6.27913
ENSRNOG00000060087	-1.69125	2.59997	-6.48278	0.000181449	0.00181713	1.26429	Adra1b	10	adrenoceptor alpha 1B	ENSG00000170214	ADRA1B	1	147	1.77948	3.42045
ENSRNOG00000010753	1.16174	3.20192	6.48616	0.000180795	0.00181713	1.09937	Aig1	1	androgen-induced 1	ENSG00000146416	AIG1	1	51390	3.76258	2.64127
ENSRNOG00000021793	1.03917	4.06512	6.48342	0.000181323	0.00181713	0.929297	Tmem136	8	transmembrane protein 136	ENSG00000181264	TLCD5	1	219902	4.58779	3.54245
ENSRNOG00000021237	-1.10506	5.64137	-6.48429	0.000181156	0.00181713	0.745641	RGD1565616	3	RGD1565616	ENSG00000088854	C20orf194	1	25943	5.15104	6.13169
ENSRNOG00000018338	1.43625	5.35415	6.48288	0.000181429	0.00181713	0.740712	Vwa1	5	von Willebrand factor A domain containing 1	ENSG00000179403	VWA1	1	64856	6.00197	4.70632
ENSRNOG00000002616	-1.47862	6.67059	-6.48654	0.000180721	0.00181713	0.709765	Slc5a10	10	solute carrier family 5 member 10	ENSG00000154025	SLC5A10	1	125206	5.92	7.42119
ENSRNOG00000026742	-0.670663	6.51247	-6.48257	0.000181489	0.00181713	0.686623	Ypel5	6	yippee-like 5	ENSG00000119801	YPEL5	1	51646	6.19602	6.82893
ENSRNOG00000007591	-1.09186	5.31847	-6.48072	0.000181847	0.00181772	0.775648	Slc45a3	13	solute carrier family 45, member 3	ENSG00000158715	SLC45A3	1	85414	4.7826	5.85435
ENSRNOG00000003289	-0.890301	7.63135	-6.48103	0.000181787	0.00181772	0.737458	Lap3	14	leucine aminopeptidase 3	ENSG00000002549	LAP3	1	51056	7.19628	8.06642
ENSRNOG00000007329	1.10132	5.47942	6.4777	0.000182434	0.00182209	0.717752	Frmd6	6	FERM domain containing 6	ENSG00000139926	FRMD6	1	122786	6.00684	4.952
ENSRNOG00000018646	1.19167	2.70075	6.47609	0.000182749	0.00182374	1.17375	Hbegf	18	heparin-binding EGF-like growth factor	ENSG00000113070	HBEGF	1	1839	3.30261	2.0989
ENSRNOG00000033740	1.2129	3.67469	6.47459	0.000183042	0.00182515	1.00339	Lurap1l	5	leucine rich adaptor protein 1-like	ENSG00000153714	LURAP1L	1	286343	4.22638	3.12301
ENSRNOG00000057957	-2.09273	3.31493	-6.46953	0.000184034	0.00183354	1.19153	Aim1l	5	absent in melanoma 1-like	ENSG00000176092	CRYBG2	1	55057	2.34736	4.28251
ENSRNOG00000009084	-1.52123	3.06421	-6.46634	0.000184661	0.00183828	1.17759	Rpusd3	4	RNA pseudouridylate synthase domain containing 3	ENSG00000156990	RPUSD3	1	285367	2.32468	3.80373
ENSRNOG00000015498	1.9193	3.24623	6.46179	0.000185562	0.00184422	1.09327	Il17rb	16	interleukin 17 receptor B	ENSG00000056736	IL17RB	1	55540	4.19647	2.29598
ENSRNOG00000011775	-1.19248	5.11129	-6.4618	0.000185561	0.00184422	0.793066	Mfap3l	16	microfibrillar-associated protein 3-like	ENSG00000198948	MFAP3L	1	9848	4.58607	5.63651
ENSRNOG00000007906	2.34405	0.734325	6.45803	0.000186311	0.00185015	1.25538	Bub1b	3	BUB1 mitotic checkpoint serine/threonine kinase B	ENSG00000156970	BUB1B	1	701	1.87737	-0.408724
ENSRNOG00000007906	2.34405	0.734325	6.45803	0.000186311	0.00185015	1.25538	Bub1b	3	BUB1 mitotic checkpoint serine/threonine kinase B	ENSG00000259288	BUB1B-PAK6	0	106821730	1.87737	-0.408724
ENSRNOG00000021155	3.46885	4.58864	6.45553	0.00018681	0.00185208	0.905926	Ctsk	2	cathepsin K	ENSG00000143387	CTSK	1	1513	6.21274	2.96454
ENSRNOG00000004110	-0.900628	5.86364	-6.45627	0.000186662	0.00185208	0.68711	Trib2	6	tribbles pseudokinase 2	ENSG00000071575	TRIB2	1	28951	5.42259	6.30469
ENSRNOG00000018992	1.95174	2.98758	6.45085	0.000187747	0.00185898	1.10092	Dpysl3	18	dihydropyrimidinase-like 3	ENSG00000113657	DPYSL3	1	1809	3.93783	2.03732
ENSRNOG00000024382	1.45228	3.04581	6.45053	0.000187812	0.00185898	1.09865	Fcgr3a	13	Fc fragment of IgG receptor IIIa	ENSG00000203747	FCGR3A	1	2214	3.81184	2.27978
ENSRNOG00000024382	1.45228	3.04581	6.45053	0.000187812	0.00185898	1.09865	Fcgr3a	13	Fc fragment of IgG receptor IIIa	ENSG00000162747	FCGR3B	1	2215	3.81184	2.27978
ENSRNOG00000052444	1.18906	3.29735	6.4492	0.000188079	0.0018601	1.04004	RGD1563091	4	similar to OEF2	ENSG00000205413	SAMD9	1	54809	3.9029	2.6918
ENSRNOG00000010872	1.00385	8.05506	6.44818	0.000188285	0.00186062	0.751841	Ckb	6	creatine kinase B	ENSG00000166165	CKB	1	1152	8.5171	7.59302
ENSRNOG00000005871	4.98292	2.14752	6.44504	0.00018892	0.00186234	1.25812	Il1rn	3	interleukin 1 receptor antagonist	ENSG00000136689	IL1RN	1	3557	4.44997	-0.15493
ENSRNOG00000008005	1.37533	3.59803	6.44571	0.000188785	0.00186234	0.977779	Akna	5	AT-hook transcription factor	ENSG00000106948	AKNA	1	80709	4.28115	2.91491
ENSRNOG00000025155	-1.17104	6.47517	-6.44652	0.00018862	0.00186234	0.655864	Lmtk2	12	lemur tyrosine kinase 2	ENSG00000164715	LMTK2	1	22853	5.96363	6.9867
ENSRNOG00000021447	3.27596	-0.616816	6.44418	0.000189093	0.00186254	1.06195	Prr7	17	proline rich 7 (synaptic)	ENSG00000131188	PRR7	1	80758	0.941205	-2.17484
ENSRNOG00000007300	2.32811	2.30543	6.44316	0.000189301	0.00186281	1.19802	C1qtnf6	7	C1q and tumor necrosis factor related protein 6	ENSG00000133466	C1QTNF6	1	114904	3.35118	1.25969
ENSRNOG00000005132	-1.70275	3.45506	-6.44253	0.000189428	0.00186281	1.11424	Slc52a3	3	solute carrier family 52 member 3	ENSG00000101276	SLC52A3	1	113278	2.65657	4.25355
ENSRNOG00000012315	-2.35763	6.71841	-6.4407	0.0001898	0.00186496	0.690255	Agmat	5	agmatinase	ENSG00000116771	AGMAT	1	79814	5.59045	7.84637
ENSRNOG00000059827	2.81856	0.0408387	6.43771	0.00019041	0.00186943	1.15574	LOC691995	10	hypothetical protein LOC691995	ENSG00000286190	AC055839.2	1	NA	1.40346	-1.32178
ENSRNOG00000037798	-2.41426	4.50863	-6.43283	0.00019141	0.00187774	0.962725	Erich4	1	glutamate-rich 4	ENSG00000204978	ERICH4	1	100170765	3.35337	5.6639
ENSRNOG00000051307	0.935191	4.30023	6.4317	0.000191641	0.00187849	0.83099	Aoc3	10	amine oxidase, copper containing 3	ENSG00000131471	AOC3	1	8639	4.75639	3.84407
ENSRNOG00000016308	2.09835	1.43491	6.42899	0.0001922	0.00187906	1.24308	Il10ra	8	interleukin 10 receptor subunit alpha	ENSG00000110324	IL10RA	1	3587	2.447	0.422831
ENSRNOG00000043426	-1.23058	3.95576	-6.43024	0.000191942	0.00187906	0.980353	Kyat3	2	kynurenine aminotransferase 3	ENSG00000137944	KYAT3	1	56267	3.33853	4.57299
ENSRNOG00000013428	-1.02693	8.62826	-6.42841	0.000192319	0.00187906	0.747714	Atp6v0a4	4	ATPase H+ transporting V0 subunit a4	ENSG00000105929	ATP6V0A4	1	50617	8.10802	9.1485
ENSRNOG00000005183	0.590905	6.04008	6.42879	0.00019224	0.00187906	0.623389	Rtf1	3	Rtf1, Paf1/RNA polymerase II complex component, homolog (S. cerevisiae)	ENSG00000137815	RTF1	1	23168	6.329	5.75115
ENSRNOG00000029242	1.59634	3.25204	6.42506	0.000193013	0.00188281	1.01278	Plekho2	8	pleckstrin homology domain containing O2	ENSG00000241839	PLEKHO2	1	80301	4.06107	2.44301
ENSRNOG00000029242	1.59634	3.25204	6.42506	0.000193013	0.00188281	1.01278	Plekho2	8	pleckstrin homology domain containing O2	ENSG00000249240	AC069368.1	0	NA	4.06107	2.44301
ENSRNOG00000007925	0.91272	4.37231	6.42567	0.000192885	0.00188281	0.80942	Pak6	3	p21 (RAC1) activated kinase 6	ENSG00000137843	PAK6	1	56924	4.87543	3.86919
ENSRNOG00000007925	0.91272	4.37231	6.42567	0.000192885	0.00188281	0.80942	Pak6	3	p21 (RAC1) activated kinase 6	ENSG00000137843	PAK6	1	106821730	4.87543	3.86919
ENSRNOG00000005195	1.03478	8.36852	6.42382	0.000193269	0.00188379	0.746286	Cst3	3	cystatin C	ENSG00000101439	CST3	1	1471	8.82978	7.90725
ENSRNOG00000001967	-2.25087	5.55612	-6.42263	0.000193516	0.00188468	0.756937	Sult1b1	14	sulfotransferase family 1B member 1	ENSG00000173597	SULT1B1	1	27284	4.542	6.57025
ENSRNOG00000010729	-0.818436	6.57349	-6.42069	0.000193921	0.00188711	0.618036	Usp8	3	ubiquitin specific peptidase 8	ENSG00000138592	USP8	1	9101	6.20551	6.94147
ENSRNOG00000020696	1.03236	4.67344	6.41954	0.00019416	0.00188793	0.748874	Pmvk	2	phosphomevalonate kinase	ENSG00000163344	PMVK	1	10654	5.15716	4.18972
ENSRNOG00000014940	5.84791	-1.636	6.41764	0.000194557	0.00189027	1.08285	Sfrp5	1	secreted frizzled-related protein 5	ENSG00000120057	SFRP5	1	6425	1.20004	-4.47203
ENSRNOG00000010805	2.40701	5.82614	6.41344	0.000195437	0.00189609	0.678898	Fabp4	2	fatty acid binding protein 4	ENSG00000170323	FABP4	1	2167	6.9229	4.72937
ENSRNOG00000004245	-1.19375	6.86744	-6.41329	0.000195468	0.00189609	0.620076	Mgst3	13	microsomal glutathione S-transferase 3	ENSG00000143198	MGST3	1	4259	6.2315	7.50338
ENSRNOG00000026592	3.98864	0.355551	6.41143	0.00019586	0.00189686	1.15382	Rhbdl2	5	rhomboid like 2	ENSG00000158315	RHBDL2	1	54933	2.20112	-1.49002
ENSRNOG00000018552	-0.9827	5.61653	-6.41182	0.000195779	0.00189686	0.662671	Slc25a38	8	solute carrier family 25, member 38	ENSG00000144659	SLC25A38	1	54977	5.13287	6.10018
ENSRNOG00000007728	1.3458	4.25065	6.40973	0.000196219	0.00189882	0.810823	Gsdmd	7	gasdermin D	ENSG00000104518	GSDMD	1	79792	4.88745	3.61384
ENSRNOG00000020388	-1.21628	5.81296	-6.40107	0.000198054	0.00191505	0.637066	Inpp5f	1	inositol polyphosphate-5-phosphatase F	ENSG00000198825	INPP5F	1	22876	5.28842	6.3375
ENSRNOG00000001129	-0.834522	5.29301	-6.39992	0.000198302	0.00191592	0.678778	Fbxo21	12	F-box protein 21	ENSG00000135108	FBXO21	1	23014	4.89857	5.68744
ENSRNOG00000017628	1.91998	7.48142	6.39773	0.000198769	0.0019189	0.669305	Tagln	8	transgelin	ENSG00000149591	TAGLN	1	6876	8.33223	6.63062
ENSRNOG00000002318	-1.10977	5.53654	-6.39622	0.000199093	0.00192051	0.655773	Limch1	14	LIM and calponin homology domains 1	ENSG00000064042	LIMCH1	1	22998	5.05253	6.02055
ENSRNOG00000015591	-1.31559	9.04448	-6.39388	0.000199596	0.00192382	0.736715	Cndp2	18	CNDP dipeptidase 2 (metallopeptidase M20 family)	ENSG00000133313	CNDP2	1	55748	8.3689	9.72006
ENSRNOG00000002662	1.12474	3.48966	6.39229	0.000199938	0.00192559	0.948671	Pbdc1	X	polysaccharide biosynthesis domain containing 1	ENSG00000102390	PBDC1	1	51260	4.00421	2.97511
ENSRNOG00000005556	1.11425	3.29985	6.38988	0.000200457	0.00192765	0.97985	Snrpf	7	small nuclear ribonucleoprotein polypeptide F	ENSG00000139343	SNRPF	1	6636	3.81924	2.78046
ENSRNOG00000015353	0.799383	4.48684	6.38914	0.000200618	0.00192765	0.742516	Prss12	2	protease, serine 12	ENSG00000164099	PRSS12	1	8492	4.87779	4.09589
ENSRNOG00000016384	-0.742009	5.72385	-6.38909	0.000200628	0.00192765	0.61183	Pik3cb	8	phosphatidylinositol-4,5-bisphosphate 3-kinase, catalytic subunit beta	ENSG00000051382	PIK3CB	1	5291	5.38286	6.06484
ENSRNOG00000010887	-2.69471	8.34949	-6.38697	0.000201088	0.00193054	0.672393	RGD1309534	8	similar to RIKEN cDNA 4931406C07	ENSG00000182919	C11orf54	1	28970	7.05593	9.64305
ENSRNOG00000020942	1.82801	2.47953	6.38581	0.000201339	0.00193142	1.11145	Plekha4	1	pleckstrin homology domain containing A4	ENSG00000105559	PLEKHA4	1	57664	3.31098	1.64809
ENSRNOG00000029330	-1.38143	7.09287	-6.3826	0.000202037	0.00193659	0.592824	Ca5b	X	carbonic anhydrase 5B	ENSG00000169239	CA5B	1	11238	6.42705	7.75869
ENSRNOG00000019372	-1.96974	7.96393	-6.38141	0.000202297	0.00193755	0.641129	Pc	1	pyruvate carboxylase	ENSG00000173599	PC	1	5091	6.94548	8.98239
ENSRNOG00000047977	0.832984	4.69359	6.38023	0.000202555	0.00193849	0.699928	LOC100910163	16	uncharacterized LOC100910163	ENSG00000176907	TCIM	1	56892	5.12368	4.2635
ENSRNOG00000042918	-2.44261	2.48989	-6.37869	0.000202891	0.00193865	1.17712	RGD1304770	20	similar to Na+ dependent glucose transporter 1	ENSG00000173214	MFSD4B	1	91749	1.34808	3.63169
ENSRNOG00000022764	2.37475	2.55267	6.37878	0.000202872	0.00193865	1.09772	Evi2a	10	ecotropic viral integration site 2A	ENSG00000265118	AC134669.1	0	NA	3.65779	1.44754
ENSRNOG00000022764	2.37475	2.55267	6.37878	0.000202872	0.00193865	1.09772	Evi2a	10	ecotropic viral integration site 2A	ENSG00000126860	EVI2A	1	2123	3.65779	1.44754
ENSRNOG00000012084	-0.782999	7.50343	-6.37685	0.000203294	0.00194097	0.608307	Xpnpep1	1	X-prolyl aminopeptidase 1	ENSG00000108039	XPNPEP1	1	7511	7.10654	7.90031
ENSRNOG00000061394	3.72378	-0.72927	6.37272	0.000204204	0.00194519	1.01602	Clec4e	4	C-type lectin domain family 4, member E	ENSG00000166523	CLEC4E	1	26253	0.89967	-2.35821
ENSRNOG00000061890	-2.69739	4.4037	-6.37266	0.000204217	0.00194519	0.94686	Ust5r	1	integral membrane transport protein UST5r	ENSG00000149742	SLC22A9	1	114571	3.17615	5.63125
ENSRNOG00000036701	-2.19842	4.7728	-6.37385	0.000203955	0.00194519	0.834419	LOC100361457	10	actin, gamma 1 propeptide-like	ENSG00000184009	ACTG1	1	71	3.59613	5.94947
ENSRNOG00000032472	4.76751	0.172747	6.36825	0.000205193	0.0019475	1.08827	Adgrg2	X	adhesion G protein-coupled receptor G2	ENSG00000173698	ADGRG2	1	10149	2.69537	-2.34988
ENSRNOG00000000561	1.64847	2.84781	6.36886	0.000205056	0.0019475	1.04648	Pald1	20	phosphatase domain containing, paladin 1	ENSG00000107719	PALD1	1	27143	3.56239	2.13322
ENSRNOG00000013728	-1.027	4.12084	-6.36755	0.000205348	0.0019475	0.848044	Polg2	10	DNA polymerase gamma 2, accessory subunit	ENSG00000256525	POLG2	1	11232	3.63923	4.60245
ENSRNOG00000013309	0.887919	5.22653	6.36721	0.000205422	0.0019475	0.606643	Pik3ap1	1	phosphoinositide-3-kinase adaptor protein 1	ENSG00000155629	PIK3AP1	1	118788	5.67224	4.78082
ENSRNOG00000018525	-0.852221	5.67259	-6.36817	0.00020521	0.0019475	0.594724	Slc4a9	18	solute carrier family 4 member 9	ENSG00000113073	SLC4A9	1	83697	5.29552	6.04966
ENSRNOG00000028629	0.797962	7.17387	6.36867	0.0002051	0.0019475	0.593467	Akt1	6	AKT serine/threonine kinase 1	ENSG00000142208	AKT1	1	207	7.53388	6.81387
ENSRNOG00000000041	-1.40303	6.89563	-6.36204	0.000206574	0.00195682	0.564304	Slc26a1	14	solute carrier family 26 member 1	ENSG00000145217	SLC26A1	1	10861	6.18204	7.60922
ENSRNOG00000047134	0.690621	5.947	6.36135	0.000206728	0.00195682	0.548283	Gtf2f1	9	general transcription factor IIF subunit 1	ENSG00000125651	GTF2F1	1	2962	6.2708	5.6232
ENSRNOG00000016313	0.863468	4.21554	6.35869	0.000207323	0.00196092	0.761776	Ctnnbip1	5	catenin, beta-interacting protein 1	ENSG00000178585	CTNNBIP1	1	56998	4.63689	3.79418
ENSRNOG00000014481	-3.29965	3.57779	-6.35566	0.000208004	0.00196584	1.08382	Adtrp	17	androgen-dependent TFPI-regulating protein	ENSG00000111863	ADTRP	1	84830	1.94552	5.21005
ENSRNOG00000012343	-1.12252	4.9442	-6.35191	0.00020885	0.00197229	0.680381	Pdp2	19	pyruvate dehyrogenase phosphatase catalytic subunit 2	ENSG00000172840	PDP2	1	57546	4.41033	5.47806
ENSRNOG00000011332	3.38559	-0.508347	6.3501	0.00020926	0.00197463	1.00957	Clspn	5	claspin	ENSG00000092853	CLSPN	1	63967	1.24726	-2.26395
ENSRNOG00000047158	-1.15658	7.88594	-6.3472	0.000209917	0.00197813	0.599116	LOC103689947	2	selenium-binding protein 1	ENSG00000143416	SELENBP1	1	8991	7.26616	8.50572
ENSRNOG00000008465	1.61092	7.10111	6.34703	0.000209957	0.00197813	0.579256	Tmem176b	4	transmembrane protein 176B	ENSG00000106565	TMEM176B	1	28959	7.80671	6.39551
ENSRNOG00000015797	-1.51963	2.98667	-6.34531	0.000210347	0.00198027	1.05518	Neurl2	3	neuralized E3 ubiquitin protein ligase 2	ENSG00000124257	NEURL2	1	140825	2.17747	3.79587
ENSRNOG00000014776	2.83364	2.20598	6.34222	0.000211055	0.00198539	1.09601	Adcy7	19	adenylate cyclase 7	ENSG00000121281	ADCY7	1	113	3.64106	0.7709
ENSRNOG00000011947	2.8339	1.25211	6.34074	0.000211393	0.00198592	1.15289	Tifab	17	TIFA inhibitor	ENSG00000255833	TIFAB	1	497189	2.68004	-0.175829
ENSRNOG00000058522	-1.34748	5.17053	-6.34054	0.000211439	0.00198592	0.649338	Fam214a	8	family with sequence similarity 214, member A	ENSG00000047346	FAM214A	1	56204	4.58929	5.75177
ENSRNOG00000007006	-2.87561	10.7042	-6.3373	0.000212183	0.00199061	0.788448	Slc3a1	6	solute carrier family 3 member 1	ENSG00000138079	SLC3A1	1	6519	9.31313	12.0954
ENSRNOG00000012804	2.43382	4.64928	6.33694	0.000212266	0.00199061	0.699684	C1qc	5	complement C1q C chain	ENSG00000159189	C1QC	1	714	5.74616	3.5524
ENSRNOG00000019476	-0.63482	5.97152	-6.33591	0.000212502	0.00199128	0.528453	Agap1	9	ArfGAP with GTPase domain, ankyrin repeat and PH domain 1	ENSG00000157985	AGAP1	1	116987	5.66264	6.2804
ENSRNOG00000019926	4.268	1.3351	6.33442	0.000212845	0.00199296	1.14221	Ramp1	9	receptor activity modifying protein 1	ENSG00000132329	RAMP1	1	10267	3.27937	-0.609166
ENSRNOG00000020695	1.96642	2.25535	6.33191	0.000213427	0.00199533	1.07965	Tead2	1	TEA domain transcription factor 2	ENSG00000074219	TEAD2	1	8463	3.25605	1.25466
ENSRNOG00000017602	1.12495	5.40858	6.33214	0.000213373	0.00199533	0.555711	Il34	19	interleukin 34	ENSG00000157368	IL34	1	146433	5.8964	4.92076
ENSRNOG00000000700	3.04274	2.05913	6.32651	0.00021468	0.0020055	1.10791	Tmem119	12	transmembrane protein 119	ENSG00000183160	TMEM119	1	338773	3.39736	0.720909
ENSRNOG00000057042	-0.991337	5.90509	-6.32547	0.000214924	0.00200623	0.531264	Pcca	15	propionyl-CoA carboxylase alpha subunit	ENSG00000175198	PCCA	1	5095	5.45082	6.35935
ENSRNOG00000015461	2.57686	4.47334	6.32345	0.000215396	0.00200774	0.727917	Serpine2	9	serpin family E member 2	ENSG00000135919	SERPINE2	1	5270	5.61386	3.33282
ENSRNOG00000002930	1.54703	5.99989	6.32336	0.000215416	0.00200774	0.526064	Ppl	10	periplakin	ENSG00000118898	PPL	1	5493	6.85455	5.14522
ENSRNOG00000011573	-1.51783	7.30321	-6.32098	0.000215973	0.00201139	0.530588	Csad	7	cysteine sulfinic acid decarboxylase	ENSG00000139631	CSAD	1	51380	6.56719	8.03922
ENSRNOG00000019470	-2.50986	11.1142	-6.31974	0.000216266	0.00201257	0.800949	Hao2	2	hydroxyacid oxidase 2	ENSG00000116882	HAO2	1	51179	9.88613	12.3422
ENSRNOG00000020113	-0.869901	5.18642	-6.31771	0.000216741	0.00201545	0.596924	Cnnm2	1	cyclin and CBS domain divalent metal cation transport mediator 2	ENSG00000148842	CNNM2	1	54805	4.76655	5.6063
ENSRNOG00000016299	0.924684	4.70557	6.31204	0.000218082	0.00202636	0.617356	Klf4	5	Kruppel like factor 4	ENSG00000136826	KLF4	1	9314	5.1383	4.27285
ENSRNOG00000000875	-0.736973	5.08557	-6.30949	0.000218689	0.00203044	0.594983	Fhl1	X	four and a half LIM domains 1	ENSG00000022267	FHL1	1	2273	4.68637	5.48476
ENSRNOG00000010301	1.29231	3.01967	6.3082	0.000218996	0.00203174	0.929703	Eif4e3	4	eukaryotic translation initiation factor 4E family member 3	ENSG00000163412	EIF4E3	1	317649	3.62154	2.4178
ENSRNOG00000016541	1.14627	4.07112	6.30719	0.000219237	0.00203225	0.718494	Enc1	2	ectodermal-neural cortex 1	ENSG00000171617	ENC1	1	8507	4.66735	3.47489
ENSRNOG00000007799	-2.19818	6.22861	-6.30637	0.000219431	0.00203225	0.546943	Fam151a	5	family with sequence similarity 151, member A	ENSG00000162391	FAM151A	1	338094	5.08995	7.36727
ENSRNOG00000060349	0.703593	6.16978	6.30586	0.000219554	0.00203225	0.479451	Fam3c	4	family with sequence similarity 3, member C	ENSG00000196937	FAM3C	1	10447	6.52674	5.81282
ENSRNOG00000021548	0.81063	4.31636	6.30455	0.000219867	0.0020336	0.676424	Rassf1	8	Ras association domain family member 1	ENSG00000068028	RASSF1	1	11186	4.72746	3.90527
ENSRNOG00000031431	1.38363	2.44751	6.30181	0.000220522	0.00203655	1.02323	Cdca8	5	cell division cycle associated 8	ENSG00000134690	CDCA8	1	55143	3.07516	1.81987
ENSRNOG00000008907	-1.14913	4.83456	-6.30194	0.000220492	0.00203655	0.648738	Fggy	5	FGGY carbohydrate kinase domain containing	ENSG00000172456	FGGY	1	55277	4.24778	5.42134
ENSRNOG00000003400	-2.625	6.61029	-6.29964	0.000221045	0.00203984	0.542968	Fmo4	13	flavin containing monooxygenase 4	ENSG00000076258	FMO4	1	2329	5.36595	7.85462
ENSRNOG00000018859	1.54759	3.09612	6.29272	0.000222717	0.00205058	0.896062	Pik3ip1	14	phosphoinositide-3-kinase interacting protein 1	ENSG00000100100	PIK3IP1	1	113791	3.85488	2.33735
ENSRNOG00000039494	-1.70959	6.90113	-6.29275	0.00022271	0.00205058	0.489911	Aass	4	aminoadipate-semialdehyde synthase	ENSG00000008311	AASS	1	10157	6.04306	7.75919
ENSRNOG00000009928	-0.914938	7.03604	-6.29304	0.00022264	0.00205058	0.482641	Bckdhb	8	branched chain keto acid dehydrogenase E1 subunit beta	ENSG00000083123	BCKDHB	1	594	6.59215	7.47993
ENSRNOG00000037307	-4.87323	2.23923	-6.28916	0.000223583	0.00205152	1.08111	Spata22	10	spermatogenesis associated 22	ENSG00000141255	SPATA22	1	84690	-0.0467613	4.52522
ENSRNOG00000010146	3.0933	0.482078	6.28897	0.000223629	0.00205152	1.05586	Ndn	1	necdin, MAGE family member	ENSG00000182636	NDN	1	4692	1.94003	-0.975878
ENSRNOG00000050224	1.77616	2.43553	6.28972	0.000223447	0.00205152	0.997013	Stambpl1	1	STAM binding protein-like 1	ENSG00000138134	STAMBPL1	1	57559	3.31301	1.55804
ENSRNOG00000060665	1.31436	4.46063	6.2915	0.000223014	0.00205152	0.63587	Afap1	14	actin filament associated protein 1	ENSG00000196526	AFAP1	1	60312	5.06538	3.85589
ENSRNOG00000009889	-0.998324	6.39821	-6.28883	0.000223664	0.00205152	0.468256	Pgm1	5	phosphoglucomutase 1	ENSG00000079739	PGM1	1	5236	5.89559	6.90082
ENSRNOG00000010993	-0.679359	5.29262	-6.28606	0.000224341	0.00205617	0.537413	Dpm1	3	dolichyl-phosphate mannosyltransferase subunit 1, catalytic	ENSG00000000419	DPM1	1	8813	4.94533	5.63992
ENSRNOG00000055672	3.80891	4.07032	6.28414	0.000224809	0.00205764	0.883217	Gpx2	6	glutathione peroxidase 2	ENSG00000176153	GPX2	1	2877	5.68002	2.46062
ENSRNOG00000018878	0.767183	4.98678	6.28402	0.00022484	0.00205764	0.545363	Ssh3	1	slingshot protein phosphatase 3	ENSG00000172830	SSH3	1	54961	5.40063	4.57294
ENSRNOG00000009512	-0.855743	7.15493	-6.28181	0.000225381	0.00206104	0.474638	Esd	15	esterase D	ENSG00000139684	ESD	1	2098	6.69556	7.6143
ENSRNOG00000018598	1.42116	1.99509	6.28108	0.000225562	0.00206114	1.04758	Ankrd1	1	ankyrin repeat domain 1	ENSG00000148677	ANKRD1	1	27063	2.71004	1.28015
ENSRNOG00000004740	-0.784029	6.23943	-6.27309	0.000227536	0.00207761	0.446607	Mmadhc	3	methylmalonic aciduria and homocystinuria, cblD type	ENSG00000168288	MMADHC	1	27249	5.85405	6.62481
ENSRNOG00000007426	-1.02365	3.64092	-6.27167	0.00022789	0.00207772	0.837792	Tmem64	5	transmembrane protein 64	ENSG00000180694	TMEM64	1	169200	3.12813	4.1537
ENSRNOG00000007949	-4.48519	6.72994	-6.27208	0.000227789	0.00207772	0.617268	Rgn	X	regucalcin	ENSG00000130988	RGN	1	9104	4.75933	8.70055
ENSRNOG00000012840	1.64825	9.43572	6.26914	0.000228521	0.00208191	0.66298	Sparc	10	secreted protein acidic and cysteine rich	ENSG00000113140	SPARC	1	6678	10.1684	8.70308
ENSRNOG00000018969	1.11073	3.31689	6.26817	0.000228763	0.00208255	0.832754	Gpatch4	2	G patch domain containing 4	ENSG00000160818	GPATCH4	1	54865	3.92195	2.71183
ENSRNOG00000011228	2.19876	2.37683	6.266	0.000229307	0.00208437	0.982579	Layn	8	layilin	ENSG00000204381	LAYN	1	143903	3.42763	1.32602
ENSRNOG00000005903	0.959418	6.81473	6.26656	0.000229167	0.00208437	0.456924	St14	8	suppression of tumorigenicity 14	ENSG00000149418	ST14	1	6768	7.27024	6.35923
ENSRNOG00000036726	4.45142	-0.873221	6.26263	0.000230153	0.0020905	0.953403	Cd300e	10	Cd300e molecule	ENSG00000186407	CD300E	1	342510	1.42458	-3.17102
ENSRNOG00000024178	3.87445	-1.58255	6.2574	0.000231474	0.00210092	0.84987	Cenpt	19	centromere protein T	ENSG00000102901	CENPT	1	80152	0.252949	-3.41804
ENSRNOG00000020872	2.38484	1.08072	6.25554	0.000231943	0.00210171	1.06376	LOC100911215	1	T-cell surface glycoprotein CD5-like	ENSG00000110448	CD5	1	921	2.2749	-0.113458
ENSRNOG00000061040	-0.908549	5.17063	-6.25529	0.000232007	0.00210171	0.529008	Herc4	20	HECT and RLD domain containing E3 ubiquitin protein ligase 4	ENSG00000148634	HERC4	1	26091	4.75747	5.58379
ENSRNOG00000002322	-0.913829	7.4415	-6.255	0.00023208	0.00210171	0.46182	RGD1310587	13	similar to hypothetical protein FLJ14146	ENSG00000162817	C1orf115	1	79762	6.95643	7.92658
ENSRNOG00000061695	-2.82672	5.68407	-6.25337	0.000232497	0.00210391	0.588562	Slc23a1	18	solute carrier family 23 member 1	ENSG00000170482	SLC23A1	1	9963	4.38437	6.98376
ENSRNOG00000014610	-2.63754	9.25305	-6.24578	0.000234436	0.00211988	0.574853	Anpep	1	alanyl aminopeptidase, membrane	ENSG00000166825	ANPEP	1	290	7.98576	10.5203
ENSRNOG00000023830	1.39082	4.20605	6.24222	0.000235351	0.00212657	0.626603	Dnase2	19	deoxyribonuclease 2, lysosomal	ENSG00000105612	DNASE2	1	1777	4.83581	3.5763
ENSRNOG00000024651	-2.31603	2.96177	-6.23915	0.000236146	0.00213217	0.965177	Greb1	6	growth regulation by estrogen in breast cancer 1	ENSG00000196208	GREB1	1	9687	1.85497	4.06857
ENSRNOG00000002301	-0.664495	7.27272	-6.23796	0.000236454	0.00213241	0.430661	Uso1	14	USO1 vesicle transport factor	ENSG00000138768	USO1	1	8615	6.96051	7.58492
ENSRNOG00000049203	-0.930018	5.88851	-6.23769	0.000236524	0.00213241	0.430266	Pex5	4	peroxisomal biogenesis factor 5	ENSG00000139197	PEX5	1	5830	5.42258	6.35444
ENSRNOG00000005153	1.16791	4.83253	6.23639	0.000236861	0.00213349	0.509637	LOC690422	6	hypothetical protein LOC690422	ENSG00000185347	TEDC1	1	283643	5.4651	4.19995
ENSRNOG00000015128	0.699749	6.20356	6.23587	0.000236996	0.00213349	0.396354	Sae1	1	SUMO1 activating enzyme subunit 1	ENSG00000142230	SAE1	1	10055	6.52293	5.88419
ENSRNOG00000056714	2.07335	2.54613	6.23394	0.000237497	0.00213642	0.921216	Sla	7	src-like adaptor	ENSG00000155926	SLA	1	6503	3.60566	1.48661
ENSRNOG00000008931	-1.55726	2.30097	-6.22867	0.000238876	0.00214723	1.00421	Slc25a21	6	solute carrier family 25 member 21	ENSG00000183032	SLC25A21	1	89874	1.51578	3.08616
ENSRNOG00000009385	1.72876	2.76102	6.2246	0.000239946	0.00215048	0.885015	Pik3cg	6	phosphatidylinositol-4,5-bisphosphate 3-kinase, catalytic subunit gamma	ENSG00000105851	PIK3CG	1	5294	3.61318	1.90886
ENSRNOG00000000816	1.85107	4.25857	6.22459	0.000239947	0.00215048	0.620684	Ppp1r18	20	protein phosphatase 1, regulatory subunit 18	ENSG00000146112	PPP1R18	1	170954	5.12053	3.3966
ENSRNOG00000008694	-3.15336	9.47129	-6.22512	0.000239808	0.00215048	0.566651	Miox	7	myo-inositol oxygenase	ENSG00000100253	MIOX	1	55586	7.90092	11.0417
ENSRNOG00000013927	1.00493	4.6151	6.22647	0.000239451	0.00215048	0.531227	Jag2	6	jagged 2	ENSG00000184916	JAG2	1	3714	5.09566	4.13454
ENSRNOG00000016717	-1.68788	3.54712	-6.22143	0.000240781	0.00215326	0.848678	Gas2	1	growth arrest-specific 2	ENSG00000148935	GAS2	1	2620	2.72046	4.37377
ENSRNOG00000016695	2.91992	4.78792	6.22006	0.000241144	0.00215326	0.572607	Mmp2	19	matrix metallopeptidase 2	ENSG00000087245	MMP2	1	4313	6.09833	3.47751
ENSRNOG00000000579	1.22147	4.96375	6.22174	0.0002407	0.00215326	0.479624	Marcks	20	myristoylated alanine rich protein kinase C substrate	ENSG00000277443	MARCKS	1	4082	5.48844	4.43907
ENSRNOG00000001823	-1.25515	8.00679	-6.2207	0.000240974	0.00215326	0.455039	St6gal1	11	ST6 beta-galactoside alpha-2,6-sialyltransferase 1	ENSG00000073849	ST6GAL1	1	6480	7.4126	8.60098
ENSRNOG00000001349	0.771658	5.16133	6.22123	0.000240833	0.00215326	0.449963	Mcm7	12	minichromosome maintenance complex component 7	ENSG00000166508	MCM7	1	4176	5.51869	4.80397
ENSRNOG00000049033	1.46337	2.82433	6.21723	0.000241894	0.00215362	0.850934	Racgap1	7	Rac GTPase-activating protein 1	ENSG00000161800	RACGAP1	1	29127	3.57937	2.06929
ENSRNOG00000014844	-1.58112	5.39849	-6.2191	0.000241399	0.00215362	0.492868	Kif21a	7	kinesin family member 21A	ENSG00000139116	KIF21A	1	55605	4.72056	6.07642
ENSRNOG00000010421	-0.684775	5.37015	-6.21808	0.000241669	0.00215362	0.447209	Wdr91	4	WD repeat domain 91	ENSG00000105875	WDR91	1	29062	5.02352	5.71678
ENSRNOG00000003881	-1.37884	7.33603	-6.21727	0.000241884	0.00215362	0.407959	Nit1	13	nitrilase 1	ENSG00000158793	NIT1	1	4817	6.66624	8.00581
ENSRNOG00000003954	2.05656	3.19085	6.2107	0.000243637	0.00216279	0.796953	Il2rg	X	interleukin 2 receptor subunit gamma	ENSG00000147168	IL2RG	1	3561	4.16964	2.21206
ENSRNOG00000003954	2.05656	3.19085	6.2107	0.000243637	0.00216279	0.796953	Il2rg	X	interleukin 2 receptor subunit gamma	ENSG00000285171	AL590764.2	1	NA	4.16964	2.21206
ENSRNOG00000017123	0.958515	9.48181	6.21197	0.000243297	0.00216279	0.58498	B2m	3	beta-2 microglobulin	ENSG00000166710	B2M	1	NA	9.92142	9.04221
ENSRNOG00000004581	-0.827825	5.58757	-6.21127	0.000243485	0.00216279	0.421098	Zdhhc9	X	zinc finger, DHHC-type containing 9	ENSG00000188706	ZDHHC9	1	51114	5.16066	6.01447
ENSRNOG00000011690	-0.692452	5.52699	-6.21226	0.000243219	0.00216279	0.419881	Rmdn3	3	regulator of microtubule dynamics 3	ENSG00000137824	RMDN3	1	55177	5.16944	5.88453
ENSRNOG00000001692	2.02169	0.969265	6.20765	0.000244455	0.00216847	1.01365	Chaf1b	11	chromatin assembly factor 1 subunit B	ENSG00000159259	CHAF1B	1	8208	1.94082	-0.00228527
ENSRNOG00000060237	2.15549	2.72821	6.20553	0.000245026	0.00217194	0.872359	Inhbb	13	inhibin beta B subunit	ENSG00000163083	INHBB	1	3625	3.73158	1.72485
ENSRNOG00000018697	-0.705657	5.5716	-6.20265	0.000245804	0.00217725	0.405283	Abcb6	9	ATP-binding cassette, subfamily B (MDR/TAP), member 6	ENSG00000115657	ABCB6	1	10058	5.22581	5.91739
ENSRNOG00000016392	1.17883	3.17927	6.20136	0.000246154	0.00217876	0.772042	Zfp593	5	zinc finger protein 593	ENSG00000142684	ZNF593	1	51042	3.76542	2.59311
ENSRNOG00000018484	1.40497	2.58288	6.19906	0.000246778	0.00218245	0.886089	Plk3	5	polo-like kinase 3	ENSG00000173846	PLK3	1	1263	3.26631	1.89945
ENSRNOG00000027988	-0.984703	5.12268	-6.1985	0.000246931	0.00218245	0.465067	Zhx3	3	zinc fingers and homeoboxes 3	ENSG00000174306	ZHX3	1	23051	4.68396	5.5614
ENSRNOG00000018795	0.939829	9.07545	6.19744	0.000247219	0.00218341	0.533448	Rpl18a	16	ribosomal protein L18A	ENSG00000105640	RPL18A	1	6142	9.49517	8.65572
ENSRNOG00000018616	1.23037	2.72189	6.19371	0.000248235	0.0021892	0.857817	Cdc42ep5	1	CDC42 effector protein 5	ENSG00000167617	CDC42EP5	1	148170	3.33266	2.11112
ENSRNOG00000025899	-1.23177	6.0003	-6.19409	0.000248131	0.0021892	0.384782	Thada	6	THADA, armadillo repeat containing	ENSG00000115970	THADA	1	63892	5.43073	6.56988
ENSRNOG00000021087	2.90341	0.009266	6.19285	0.000248473	0.0021897	0.913964	Lgi4	1	leucine-rich repeat LGI family, member 4	ENSG00000153902	LGI4	1	163175	1.2993	-1.28077
ENSRNOG00000003716	3.00781	-0.937483	6.18989	0.000249282	0.00219369	0.808469	Batf3	13	basic leucine zipper ATF-like transcription factor 3	ENSG00000123685	BATF3	1	55509	0.554911	-2.42988
ENSRNOG00000016625	-3.46186	7.83688	-6.18987	0.000249287	0.00219369	0.425732	Slc22a2	1	solute carrier family 22 member 2	ENSG00000112499	SLC22A2	1	6582	6.16174	9.51202
ENSRNOG00000019283	2.21089	3.17829	6.18674	0.000250151	0.0021997	0.79719	P2ry2	1	purinergic receptor P2Y2	ENSG00000175591	P2RY2	1	5029	4.22029	2.13628
ENSRNOG00000001169	1.0125	4.71491	6.18538	0.000250525	0.00220139	0.466313	Slc37a1	20	solute carrier family 37 member 1	ENSG00000160190	SLC37A1	1	54020	5.17517	4.25464
ENSRNOG00000028448	-1.02024	7.31852	-6.18267	0.000251275	0.00220638	0.367233	Elovl1	5	ELOVL fatty acid elongase 1	ENSG00000066322	ELOVL1	1	64834	6.75735	7.87969
ENSRNOG00000048961	3.10809	0.750242	6.17775	0.000252643	0.00220731	0.96963	Bhlhe41	4	basic helix-loop-helix family, member e41	ENSG00000123095	BHLHE41	1	79365	2.09599	-0.595506
ENSRNOG00000021095	4.8727	0.178916	6.18125	0.00025167	0.00220731	0.906274	Fxyd3	1	FXYD domain-containing ion transport regulator 3	ENSG00000285526	AC020907.6	1	NA	2.31892	-1.96109
ENSRNOG00000021095	4.8727	0.178916	6.18125	0.00025167	0.00220731	0.906274	Fxyd3	1	FXYD domain-containing ion transport regulator 3	ENSG00000089356	FXYD3	0	5349	2.31892	-1.96109
ENSRNOG00000036601	-0.881551	5.76981	-6.17879	0.000252355	0.00220731	0.366749	Exoc6	1	exocyst complex component 6	ENSG00000138190	EXOC6	1	54536	5.35932	6.18029
ENSRNOG00000022485	-1.18829	6.00688	-6.17849	0.000252438	0.00220731	0.362695	Chuk	1	conserved helix-loop-helix ubiquitous kinase	ENSG00000213341	CHUK	1	1147	5.47971	6.53405
ENSRNOG00000014718	-1.03006	5.93622	-6.17924	0.000252227	0.00220731	0.359445	Acsl3	9	acyl-CoA synthetase long-chain family member 3	ENSG00000123983	ACSL3	1	2181	5.49108	6.38136
ENSRNOG00000051620	1.119	6.6703	6.17706	0.000252835	0.00220731	0.345763	Tspan9	4	tetraspanin 9	ENSG00000011105	TSPAN9	1	10867	7.15953	6.18107
ENSRNOG00000029698	-1.17083	6.32172	-6.17771	0.000252654	0.00220731	0.342808	Pim3	7	Pim-3 proto-oncogene, serine/threonine kinase	ENSG00000198355	PIM3	1	415116	5.7537	6.88975
ENSRNOG00000012004	-0.657056	6.07823	-6.18015	0.000251974	0.00220731	0.338757	Ubap1	5	ubiquitin-associated protein 1	ENSG00000165006	UBAP1	1	51271	5.76909	6.38737
ENSRNOG00000023473	1.56255	2.94519	6.1745	0.000253551	0.00221196	0.801029	Rnf122	16	ring finger protein 122	ENSG00000133874	RNF122	1	79845	3.68196	2.20841
ENSRNOG00000008214	-0.867417	5.7647	-6.17242	0.000254135	0.00221546	0.35864	Fbxo9	8	f-box protein 9	ENSG00000112146	FBXO9	1	26268	5.36242	6.16699
ENSRNOG00000059463	0.789416	6.9546	6.17066	0.000254627	0.00221816	0.345436	Slc39a1	2	solute carrier family 39 member 1	ENSG00000143570	SLC39A1	1	27173	7.31076	6.59844
ENSRNOG00000046452	4.53083	1.11683	6.16552	0.000256078	0.00222531	0.961148	Fcgr2b	13	Fc fragment of IgG receptor IIb	ENSG00000072694	FCGR2B	1	2213	3.18942	-0.955771
ENSRNOG00000046452	4.53083	1.11683	6.16552	0.000256078	0.00222531	0.961148	Fcgr2b	13	Fc fragment of IgG receptor IIb	ENSG00000143226	FCGR2A	0	2212	3.18942	-0.955771
ENSRNOG00000046452	4.53083	1.11683	6.16552	0.000256078	0.00222531	0.961148	Fcgr2b	13	Fc fragment of IgG receptor IIb	ENSG00000143226	FCGR2A	0	9103	3.18942	-0.955771
ENSRNOG00000046452	4.53083	1.11683	6.16552	0.000256078	0.00222531	0.961148	Fcgr2b	13	Fc fragment of IgG receptor IIb	ENSG00000244682	FCGR2C	0	NA	3.18942	-0.955771
ENSRNOG00000002382	8.0093	1.3216	6.16427	0.000256434	0.00222531	0.927933	LOC102553715	10	microfibril-associated glycoprotein 4-like	ENSG00000166482	MFAP4	1	4239	4.71337	-2.07017
ENSRNOG00000036677	2.08776	3.39095	6.16386	0.000256548	0.00222531	0.70675	Slc16a3	10	solute carrier family 16 member 3	ENSG00000141526	SLC16A3	1	9123	4.3862	2.39571
ENSRNOG00000029399	0.73766	8.40916	6.16622	0.000255882	0.00222531	0.443662	Bcam	1	basal cell adhesion molecule (Lutheran blood group)	ENSG00000187244	BCAM	1	4059	8.78121	8.0371
ENSRNOG00000007687	1.0005	4.74064	6.16482	0.000256276	0.00222531	0.438974	Sema7a	8	semaphorin 7A (John Milton Hagen blood group)	ENSG00000138623	SEMA7A	1	8482	5.23474	4.24655
ENSRNOG00000005041	1.12619	6.05913	6.16696	0.000255671	0.00222531	0.325224	Crip2	6	cysteine-rich protein 2	ENSG00000182809	CRIP2	1	1397	6.5809	5.53735
ENSRNOG00000016846	1.36109	3.63099	6.16224	0.000257008	0.00222771	0.639576	Pik3cd	5	phosphatidylinositol-4,5-bisphosphate 3-kinase, catalytic subunit delta	ENSG00000171608	PIK3CD	1	5293	4.29568	2.96631
ENSRNOG00000058739	0.983859	7.41924	6.15586	0.000258828	0.00224029	0.364255	Snn	10	stannin	ENSG00000184602	SNN	1	8303	7.8863	6.95218
ENSRNOG00000004172	-1.06174	6.80651	-6.15646	0.000258657	0.00224029	0.3133	Pdk2	10	pyruvate dehydrogenase kinase 2	ENSG00000005882	PDK2	1	5164	6.27015	7.34287
ENSRNOG00000007932	-4.13712	1.94235	-6.15384	0.000259406	0.00224288	0.93466	Gcm1	8	glial cells missing homolog 1	ENSG00000137270	GCM1	1	8521	0.0473495	3.83734
ENSRNOG00000010834	-2.44468	3.25682	-6.15345	0.000259519	0.00224288	0.845693	Mpped1	7	metallophosphoesterase domain containing 1	ENSG00000186732	MPPED1	1	758	2.09799	4.41566
ENSRNOG00000020607	-0.931001	7.60446	-6.15288	0.000259682	0.00224288	0.348946	Bckdha	1	branched chain ketoacid dehydrogenase E1, alpha polypeptide	ENSG00000248098	BCKDHA	1	593	7.13122	8.07771
ENSRNOG00000020607	-0.931001	7.60446	-6.15288	0.000259682	0.00224288	0.348946	Bckdha	1	branched chain ketoacid dehydrogenase E1, alpha polypeptide	ENSG00000255730	AC011462.1	1	NA	7.13122	8.07771
ENSRNOG00000009204	1.94728	2.06247	6.15054	0.000260356	0.0022471	0.890401	Il17re	4	interleukin 17 receptor E	ENSG00000163701	IL17RE	1	132014	3.01244	1.1125
ENSRNOG00000019667	-1.19096	5.21816	-6.14802	0.000261085	0.00225019	0.411912	Ppfibp2	1	PPFIA binding protein 2	ENSG00000166387	PPFIBP2	1	8495	4.65623	5.7801
ENSRNOG00000009110	-0.64533	5.74075	-6.1485	0.000260947	0.00225019	0.320417	Psen1	6	presenilin 1	ENSG00000080815	PSEN1	1	5663	5.42891	6.05259
ENSRNOG00000043304	1.54524	3.39629	6.14661	0.000261492	0.0022521	0.676453	Apcdd1	18	APC down-regulated 1	ENSG00000154856	APCDD1	1	147495	4.16015	2.63244
ENSRNOG00000029308	1.77823	2.0758	6.14025	0.000263342	0.00225993	0.878044	Lrmp	4	lymphoid-restricted membrane protein	ENSG00000118308	IRAG2	1	4033	2.99071	1.16089
ENSRNOG00000007541	1.88235	2.44314	6.13964	0.000263519	0.00225993	0.843047	Fhl3	5	four and a half LIM domains 3	ENSG00000183386	FHL3	1	2275	3.29012	1.59616
ENSRNOG00000017180	-1.96061	3.42129	-6.14049	0.000263272	0.00225993	0.793029	Slc17a2	17	solute carrier family 17, member 2	ENSG00000112337	SLC17A2	1	10246	2.57147	4.27112
ENSRNOG00000008837	-1.36754	8.77576	-6.14072	0.000263205	0.00225993	0.420276	Ass1	3	argininosuccinate synthase 1	ENSG00000130707	ASS1	1	445	8.03616	9.51536
ENSRNOG00000014727	-1.4629	7.54076	-6.13992	0.000263438	0.00225993	0.326512	Fahd1	10	fumarylacetoacetate hydrolase domain containing 1	ENSG00000180185	FAHD1	1	81889	6.81718	8.26434
ENSRNOG00000011360	1.15313	5.84406	6.14208	0.000262808	0.00225993	0.301877	Dkk2	2	dickkopf WNT signaling pathway inhibitor 2	ENSG00000155011	DKK2	1	27123	6.36732	5.3208
ENSRNOG00000003508	0.746189	5.22266	6.13332	0.000265372	0.00227422	0.337139	Ergic1	10	endoplasmic reticulum-golgi intermediate compartment 1	ENSG00000113719	ERGIC1	1	57222	5.5839	4.86143
ENSRNOG00000020726	0.932583	5.13941	6.13123	0.000265988	0.00227789	0.342721	Sipa1	1	signal-induced proliferation-associated 1	ENSG00000213445	SIPA1	1	6494	5.60995	4.66888
ENSRNOG00000003506	-0.698319	6.92959	-6.12987	0.000266389	0.00227971	0.282724	Gosr2	10	golgi SNAP receptor complex member 2	ENSG00000262633	AC005670.2	1	NA	6.57309	7.28608
ENSRNOG00000003506	-0.698319	6.92959	-6.12987	0.000266389	0.00227971	0.282724	Gosr2	10	golgi SNAP receptor complex member 2	ENSG00000108433	GOSR2	1	9570	6.57309	7.28608
ENSRNOG00000018962	-0.99058	4.14442	-6.1273	0.000267151	0.00228302	0.568826	Ctf1	1	cardiotrophin 1	ENSG00000150281	CTF1	1	1489	3.68046	4.60838
ENSRNOG00000027016	-0.863948	6.50565	-6.12764	0.000267049	0.00228302	0.271314	Cobll1	3	cordon-bleu WH2 repeat protein-like 1	ENSG00000082438	COBLL1	1	22837	6.11179	6.89951
ENSRNOG00000018689	1.22341	3.44194	6.12397	0.000268139	0.00228985	0.627588	RGD1305464	8	similar to human chromosome 15 open reading frame 39	ENSG00000167173	C15orf39	1	56905	4.08347	2.80041
ENSRNOG00000027592	1.78721	3.97082	6.12015	0.00026928	0.00229474	0.531995	Rerg	4	RAS-like, estrogen-regulated, growth-inhibitor	ENSG00000134533	RERG	1	85004	4.8331	3.10854
ENSRNOG00000010658	-2.29751	7.45622	-6.12137	0.000268914	0.00229474	0.309356	LOC103691744	2	cystathionine gamma-lyase	ENSG00000116761	CTH	1	1491	6.32612	8.58632
ENSRNOG00000001351	0.801526	5.53554	6.12056	0.000269159	0.00229474	0.287933	Trafd1	12	TRAF type zinc finger domain containing 1	ENSG00000135148	TRAFD1	1	10906	5.97445	5.09663
ENSRNOG00000031232	1.77066	4.37917	6.11779	0.000269987	0.00229754	0.454098	Nrp2	9	neuropilin 2	ENSG00000118257	NRP2	1	8828	5.22804	3.53029
ENSRNOG00000006375	-1.15243	8.98422	-6.11834	0.000269822	0.00229754	0.409172	Vdac1	10	voltage-dependent anion channel 1	ENSG00000213585	VDAC1	1	7416	8.39344	9.575
ENSRNOG00000015423	2.66322	0.490919	6.11653	0.000270364	0.00229914	0.906775	Ccna2	2	cyclin A2	ENSG00000145386	CCNA2	1	890	1.97179	-0.989958
ENSRNOG00000015262	-2.50445	10.3276	-6.11576	0.000270597	0.0022995	0.505091	Slc34a1	17	solute carrier family 34 member 1	ENSG00000131183	SLC34A1	1	6569	9.07517	11.5801
ENSRNOG00000011421	0.727783	5.27756	6.11462	0.000270939	0.0023008	0.308527	Smap2	5	small ArfGAP2	ENSG00000084070	SMAP2	1	64744	5.60848	4.94664
ENSRNOG00000009157	1.58088	3.56237	6.11323	0.00027136	0.00230115	0.607327	Fut4	8	fucosyltransferase 4	ENSG00000196371	FUT4	1	2526	4.32112	2.80362
ENSRNOG00000009946	0.898309	6.27502	6.11374	0.000271204	0.00230115	0.255082	Ldlr	8	low density lipoprotein receptor	ENSG00000130164	LDLR	1	3949	6.71867	5.83138
ENSRNOG00000021157	2.18683	4.55692	6.10773	0.000273023	0.00231195	0.440023	Ctss	2	cathepsin S	ENSG00000163131	CTSS	1	1520	5.51874	3.5951
ENSRNOG00000005053	0.950132	4.40801	6.10815	0.000272896	0.00231195	0.428387	Egln3	6	egl-9 family hypoxia-inducible factor 3	ENSG00000129521	EGLN3	1	112399	4.82838	3.98765
ENSRNOG00000014311	-0.734697	5.91302	-6.10713	0.000273205	0.00231195	0.262383	Slc7a8	15	solute carrier family 7 member 8	ENSG00000092068	SLC7A8	1	23428	5.50594	6.3201
ENSRNOG00000016037	1.04279	4.11086	6.10509	0.000273826	0.0023156	0.483503	Mafb	3	MAF bZIP transcription factor B	ENSG00000204103	MAFB	1	9935	4.56889	3.65283
ENSRNOG00000010633	-1.05404	7.59908	-6.10432	0.000274062	0.00231597	0.290589	Acsl1	16	acyl-CoA synthetase long-chain family member 1	ENSG00000151726	ACSL1	1	2180	7.09191	8.10625
ENSRNOG00000020136	4.16144	-0.922701	6.1023	0.000274677	0.00231956	0.768494	Tgm1	15	transglutaminase 1	ENSG00000092295	TGM1	1	7051	0.920915	-2.76632
ENSRNOG00000010617	4.30136	-1.50789	6.09982	0.000275438	0.00232114	0.742644	Scube1	7	signal peptide, CUB domain and EGF like domain containing 1	ENSG00000159307	SCUBE1	1	80274	0.679928	-3.69571
ENSRNOG00000000567	1.04192	4.42784	6.09995	0.000275397	0.00232114	0.415166	Unc5b	20	unc-5 netrin receptor B	ENSG00000107731	UNC5B	1	219699	4.89173	3.96396
ENSRNOG00000012475	-1.16646	5.37921	-6.10105	0.00027506	0.00232114	0.330631	Prr5	7	proline rich 5	ENSG00000186654	PRR5	1	55615	4.81081	5.94761
ENSRNOG00000008517	0.765299	5.38134	6.09783	0.000276047	0.00232309	0.27816	Cdc42ep1	7	CDC42 effector protein 1	ENSG00000128283	CDC42EP1	1	11135	5.74522	5.01746
ENSRNOG00000019568	0.884628	6.55464	6.09781	0.000276053	0.00232309	0.239601	Jund	16	JunD proto-oncogene, AP-1 transcription factor subunit	ENSG00000130522	JUND	1	3727	6.95125	6.15802
ENSRNOG00000000502	1.7466	1.68596	6.09624	0.000276536	0.00232392	0.871662	Def6	20	DEF6 guanine nucleotide exchange factor	ENSG00000023892	DEF6	1	50619	2.51485	0.857076
ENSRNOG00000029401	3.51009	2.55396	6.09687	0.000276345	0.00232392	0.830329	Actg2	4	actin, gamma 2, smooth muscle, enteric	ENSG00000163017	ACTG2	1	72	4.07935	1.02857
ENSRNOG00000013521	-1.91455	5.55667	-6.09563	0.000276726	0.00232392	0.355087	Dhfr	2	dihydrofolate reductase	ENSG00000178700	DHFR2	0	200895	4.59539	6.51795
ENSRNOG00000013521	-1.91455	5.55667	-6.09563	0.000276726	0.00232392	0.355087	Dhfr	2	dihydrofolate reductase	ENSG00000228716	DHFR	1	1719	4.59539	6.51795
ENSRNOG00000012616	0.818777	5.4151	6.09487	0.000276959	0.00232427	0.266415	Ppt1	5	palmitoyl-protein thioesterase 1	ENSG00000131238	PPT1	1	5538	5.79094	5.03925
ENSRNOG00000049629	1.99479	0.675242	6.09405	0.000277211	0.00232478	0.889976	Reep2	18	receptor accessory protein 2	ENSG00000132563	REEP2	1	51308	1.66985	-0.319366
ENSRNOG00000010940	-0.939102	6.30955	-6.09342	0.000277407	0.00232481	0.234292	Acad11	8	acyl-CoA dehydrogenase family, member 11	ENSG00000240303	ACAD11	1	84129	5.87571	6.74339
ENSRNOG00000008405	-1.41362	2.5751	-6.09005	0.00027845	0.00233195	0.820435	Taco1	10	translational activator of cytochrome c oxidase I	ENSG00000136463	TACO1	1	51204	1.87041	3.2798
ENSRNOG00000021255	1.41666	3.02993	6.08379	0.0002804	0.00234626	0.681203	Smox	3	spermine oxidase	ENSG00000088826	SMOX	1	54498	3.66612	2.39373
ENSRNOG00000005576	0.67768	4.46179	6.08333	0.000280546	0.00234626	0.38989	Rpia	4	ribose 5-phosphate isomerase A	ENSG00000153574	RPIA	1	22934	4.79683	4.12676
ENSRNOG00000002039	-0.731179	6.47134	-6.08181	0.000281022	0.00234862	0.213574	Evi5	14	ecotropic viral integration site 5	ENSG00000067208	EVI5	1	7813	6.14461	6.79808
ENSRNOG00000042944	3.34091	-1.02319	6.07819	0.000282157	0.00235649	0.735173	Cenpw	1	centromere protein W	ENSG00000203760	CENPW	1	387103	0.838831	-2.88521
ENSRNOG00000009970	-1.68189	2.65059	-6.07445	0.00028334	0.00235928	0.804686	Dfna5	4	deafness, autosomal dominant 5 (human)	ENSG00000105928	GSDME	1	1687	1.8817	3.41949
ENSRNOG00000033564	2.82626	3.96322	6.07594	0.000282867	0.00235928	0.566757	Cfd	7	complement factor D	ENSG00000197766	CFD	1	1675	5.3722	2.55424
ENSRNOG00000016484	-1.1884	4.60252	-6.07437	0.000283365	0.00235928	0.428002	Gstk1	4	glutathione S-transferase kappa 1	ENSG00000197448	GSTK1	1	373156	4.00648	5.19856
ENSRNOG00000007304	-0.98398	5.52802	-6.07406	0.000283463	0.00235928	0.267094	Herc3	4	HECT and RLD domain containing E3 ubiquitin protein ligase 3	ENSG00000287542	AC098582.1	1	NA	5.09113	5.96491
ENSRNOG00000007304	-0.98398	5.52802	-6.07406	0.000283463	0.00235928	0.267094	Herc3	4	HECT and RLD domain containing E3 ubiquitin protein ligase 3	ENSG00000138641	HERC3	1	8916	5.09113	5.96491
ENSRNOG00000007304	-0.98398	5.52802	-6.07406	0.000283463	0.00235928	0.267094	Herc3	4	HECT and RLD domain containing E3 ubiquitin protein ligase 3	ENSG00000138641	HERC3	1	84992	5.09113	5.96491
ENSRNOG00000024886	0.811236	5.7929	6.07411	0.000283447	0.00235928	0.214904	Ext1	7	exostosin glycosyltransferase 1	ENSG00000182197	EXT1	1	2131	6.15885	5.42695
ENSRNOG00000013409	-2.24843	9.10959	-6.07205	0.000284098	0.00236294	0.354419	Gclm	2	glutamate cysteine ligase, modifier subunit	ENSG00000023909	GCLM	1	2730	8.02756	10.1916
ENSRNOG00000042692	-1.78453	5.16399	-6.07124	0.000284356	0.00236346	0.367079	Slc17a1	17	solute carrier family 17 member 1	ENSG00000124568	SLC17A1	1	6568	4.31297	6.01502
ENSRNOG00000006767	3.80825	1.25751	6.06747	0.000285556	0.00236936	0.865832	Cst7	3	cystatin F	ENSG00000077984	CST7	1	8530	2.95908	-0.44406
ENSRNOG00000022067	2.72168	0.423149	6.06779	0.000285456	0.00236936	0.85318	Tlr5	13	toll-like receptor 5	ENSG00000187554	TLR5	1	7100	1.8177	-0.971405
ENSRNOG00000009958	0.614337	5.2706	6.06717	0.000285651	0.00236936	0.248908	LOC100151767	8	hypothetical LOC100151767	ENSG00000150776	NKAPD1	1	55216	5.56441	4.97679
ENSRNOG00000011060	0.995873	3.02981	6.06443	0.000286527	0.00237338	0.648078	Unc119	10	unc-119 lipid binding chaperone	ENSG00000109103	UNC119	1	9094	3.52678	2.53283
ENSRNOG00000029212	0.971068	3.90261	6.06472	0.000286435	0.00237338	0.466499	Vcan	2	versican	ENSG00000038427	VCAN	1	1462	4.40571	3.3995
ENSRNOG00000042274	-0.884206	5.32535	-6.06377	0.000286739	0.00237352	0.279573	Fbxo31	19	F-box protein 31	ENSG00000103264	FBXO31	1	79791	4.8671	5.78359
ENSRNOG00000024322	-0.935148	5.23608	-6.06187	0.00028735	0.00237695	0.284447	Shroom2	X	shroom family member 2	ENSG00000146950	SHROOM2	1	357	4.82696	5.64521
ENSRNOG00000019728	4.39814	2.02803	6.05897	0.000288283	0.00238305	0.837113	Itgad	1	integrin subunit alpha D	ENSG00000169896	ITGAM	1	3684	4.07959	-0.02352
ENSRNOG00000005502	-0.962816	6.06278	-6.05831	0.000288496	0.00238318	0.203457	Ankib1	4	ankyrin repeat and IBR domain containing 1	ENSG00000001629	ANKIB1	1	54467	5.64634	6.47922
ENSRNOG00000013967	0.977759	5.27361	6.05679	0.000288987	0.00238562	0.233648	Blnk	1	B-cell linker	ENSG00000095585	BLNK	1	29760	5.81828	4.72895
ENSRNOG00000004101	-2.03377	3.75075	-6.054	0.00028989	0.00239145	0.636948	2001-03-01	13	mitochondrial amidoxime reducing component 1	ENSG00000186205	MTARC1	1	64757	2.69594	4.80556
ENSRNOG00000004101	-2.03377	3.75075	-6.054	0.00028989	0.00239145	0.636948	2001-03-01	13	mitochondrial amidoxime reducing component 1	ENSG00000286231	AL445423.3	1	NA	2.69594	4.80556
ENSRNOG00000019128	1.90872	0.713876	6.05134	0.000290754	0.00239494	0.845187	St8sia4	9	ST8 alpha-N-acetyl-neuraminide alpha-2,8-sialyltransferase 4	ENSG00000113532	ST8SIA4	1	7903	1.66204	-0.234291
ENSRNOG00000007281	2.31947	1.92649	6.05195	0.000290556	0.00239494	0.800193	Flnc	4	filamin C	ENSG00000128591	FLNC	1	2318	2.98711	0.86587
ENSRNOG00000027914	1.00791	4.7093	6.04966	0.0002913	0.00239494	0.307466	Plscr3	10	phospholipid scramblase 3	ENSG00000187838	PLSCR3	1	57048	5.18004	4.23856
ENSRNOG00000054011	-0.928173	5.10094	-6.05025	0.00029111	0.00239494	0.293291	Tbc1d8b	X	TBC1 domain family member 8B	ENSG00000133138	TBC1D8B	1	54885	4.68024	5.52165
ENSRNOG00000011491	-1.21106	6.86803	-6.04994	0.00029121	0.00239494	0.189641	Dnajc13	8	DnaJ heat shock protein family (Hsp40) member C13	ENSG00000138246	DNAJC13	1	23317	6.35457	7.38149
ENSRNOG00000056837	1.08229	4.32141	6.04766	0.000291953	0.00239706	0.365184	Abr	10	active BCR-related	ENSG00000159842	ABR	1	29	4.83654	3.80629
ENSRNOG00000007496	-0.669006	6.32891	-6.04802	0.000291837	0.00239706	0.172102	Mtmr4	10	myotubularin related protein 4	ENSG00000108389	MTMR4	1	9110	6.02598	6.63183
ENSRNOG00000020867	2.74118	1.701	6.04636	0.000292379	0.00239893	0.82041	Numbl	1	NUMB-like, endocytic adaptor protein	ENSG00000105245	NUMBL	1	9253	2.92384	0.478158
ENSRNOG00000007604	1.2169	4.1425	6.04447	0.000293	0.0024024	0.409088	Igsf8	13	immunoglobulin superfamily, member 8	ENSG00000162729	IGSF8	1	93185	4.66222	3.62279
ENSRNOG00000001239	-1.14003	6.07625	-6.04277	0.000293559	0.00240536	0.191069	Ddt	20	D-dopachrome tautomerase	ENSG00000099974	DDTL	1	100037417	5.49848	6.65403
ENSRNOG00000001239	-1.14003	6.07625	-6.04277	0.000293559	0.00240536	0.191069	Ddt	20	D-dopachrome tautomerase	ENSG00000099977	DDT	1	1652	5.49848	6.65403
ENSRNOG00000001239	-1.14003	6.07625	-6.04277	0.000293559	0.00240536	0.191069	Ddt	20	D-dopachrome tautomerase	ENSG00000099977	DDT	1	100037417	5.49848	6.65403
ENSRNOG00000001239	-1.14003	6.07625	-6.04277	0.000293559	0.00240536	0.191069	Ddt	20	D-dopachrome tautomerase	ENSG00000285762	AC253536.7	1	NA	5.49848	6.65403
ENSRNOG00000020486	1.0171	3.07306	6.04022	0.000294399	0.00241061	0.611636	Bcl2l12	1	BCL2 like 12	ENSG00000126453	BCL2L12	1	83596	3.56185	2.58427
ENSRNOG00000012424	2.11722	0.903922	6.0372	0.000295397	0.00241481	0.833411	Adam23	9	ADAM metallopeptidase domain 23	ENSG00000114948	ADAM23	1	8745	1.89873	-0.0908821
ENSRNOG00000019110	4.62847	-1.65923	6.03607	0.000295772	0.00241481	0.695896	Ocstamp	3	osteoclast stimulatory transmembrane protein	ENSG00000149635	OCSTAMP	1	128506	0.626048	-3.94451
ENSRNOG00000010626	0.761662	4.68139	6.03599	0.000295796	0.00241481	0.292382	Sphk1	10	sphingosine kinase 1	ENSG00000176170	SPHK1	1	8877	5.04176	4.32102
ENSRNOG00000014645	-1.09076	8.72938	-6.03525	0.000296043	0.00241481	0.291043	Aldh7a1	18	aldehyde dehydrogenase 7 family, member A1	ENSG00000164904	ALDH7A1	1	501	8.14748	9.31128
ENSRNOG00000014997	-0.981462	8.24964	-6.03747	0.000295306	0.00241481	0.259726	Igf2r	1	insulin-like growth factor 2 receptor	ENSG00000197081	IGF2R	1	3482	7.77354	8.72575
ENSRNOG00000059381	0.885309	6.72931	6.03506	0.000296105	0.00241481	0.172888	Mrps6	11	mitochondrial ribosomal protein S6	ENSG00000243927	MRPS6	1	64968	7.12696	6.33166
ENSRNOG00000015840	-1.0145	8.28828	-6.03398	0.000296465	0.00241612	0.256264	Hsd17b4	18	hydroxysteroid (17-beta) dehydrogenase 4	ENSG00000133835	HSD17B4	1	3295	7.79962	8.77694
ENSRNOG00000061904	1.91903	1.06038	6.03161	0.000297254	0.0024193	0.827147	LOC103694864	KL568414.1	matrix metalloproteinase-28-like	ENSG00000271447	MMP28	1	79148	2.05261	0.0681441
ENSRNOG00000004275	-0.933431	4.44792	-6.03199	0.000297126	0.0024193	0.394475	Egfl6	X	EGF-like-domain, multiple 6	ENSG00000198759	EGFL6	1	25975	3.98214	4.9137
ENSRNOG00000016091	1.93464	3.00665	6.03023	0.000297716	0.00242143	0.608196	Tmem169	9	transmembrane protein 169	ENSG00000163449	TMEM169	1	92691	3.9196	2.09369
ENSRNOG00000052564	-1.53025	12.2503	-6.02854	0.00029828	0.0024244	0.548751	Gpx3	10	glutathione peroxidase 3	ENSG00000211445	GPX3	1	2878	11.4046	13.0959
ENSRNOG00000020229	0.908151	4.34461	6.02675	0.000298881	0.00242603	0.344313	Homer3	16	homer scaffolding protein 3	ENSG00000051128	HOMER3	1	9454	4.76508	3.92415
ENSRNOG00000009088	-0.671158	7.79641	-6.02717	0.000298739	0.00242603	0.213029	Txnrd1	7	thioredoxin reductase 1	ENSG00000198431	TXNRD1	1	7296	7.45254	8.14027
ENSRNOG00000043324	3.47754	1.15597	6.02609	0.0002991	0.00242619	0.817727	Upk2	8	uroplakin 2	ENSG00000110375	UPK2	1	7379	2.71201	-0.400067
ENSRNOG00000015434	0.61081	6.68588	6.02529	0.00029937	0.00242676	0.153716	Midn	7	midnolin	ENSG00000167470	MIDN	1	90007	6.98445	6.38731
ENSRNOG00000026985	0.645191	6.61274	6.02436	0.000299683	0.00242767	0.14955	Phldb1	8	pleckstrin homology-like domain, family B, member 1	ENSG00000019144	PHLDB1	1	23187	6.95332	6.27215
ENSRNOG00000002434	2.31467	1.68173	6.02221	0.000300407	0.00242867	0.791794	Tmem100	10	transmembrane protein 100	ENSG00000166292	TMEM100	1	55273	2.77558	0.587872
ENSRNOG00000013922	2.2896	2.17852	6.02291	0.000300172	0.00242867	0.732055	Dok2	15	docking protein 2	ENSG00000147443	DOK2	1	9046	3.35761	0.999429
ENSRNOG00000013541	0.618701	5.46078	6.02229	0.000300379	0.00242867	0.172957	Sh2d4a	16	SH2 domain containing 4A	ENSG00000104611	SH2D4A	1	63898	5.77246	5.14909
ENSRNOG00000010522	1.95054	1.81033	6.01823	0.000301751	0.00242909	0.78119	Tlr4	5	toll-like receptor 4	ENSG00000136869	TLR4	1	7099	2.66044	0.960211
ENSRNOG00000003866	1.83152	2.82451	6.02036	0.000301032	0.00242909	0.628857	Cxcr4	13	C-X-C motif chemokine receptor 4	ENSG00000121966	CXCR4	1	7852	3.71406	1.93496
ENSRNOG00000013321	1.28467	2.98299	6.01862	0.000301619	0.00242909	0.599885	Dock11	X	dedicator of cytokinesis 11	ENSG00000147251	DOCK11	1	139818	3.63026	2.33572
ENSRNOG00000018657	-0.955107	4.59211	-6.01835	0.000301711	0.00242909	0.346911	Scrn3	3	secernin 3	ENSG00000144306	SCRN3	1	79634	4.10031	5.08391
ENSRNOG00000049484	0.903176	6.63006	6.01894	0.000301511	0.00242909	0.149209	Atp9a	3	ATPase phospholipid transporting 9A (putative)	ENSG00000054793	ATP9A	1	10079	7.03754	6.22257
ENSRNOG00000020497	-0.592052	6.3395	-6.02146	0.000300661	0.00242909	0.138	Plekha1	1	pleckstrin homology domain containing A1	ENSG00000107679	PLEKHA1	1	59338	6.05689	6.62211
ENSRNOG00000003973	1.0862	5.30509	6.01648	0.000302347	0.0024314	0.182326	Cyb5r1	13	cytochrome b5 reductase 1	ENSG00000159348	CYB5R1	1	51706	5.85205	4.75814
ENSRNOG00000060853	-1.38078	8.21365	-6.01518	0.000302788	0.00243333	0.22203	Iah1	6	isoamyl acetate-hydrolyzing esterase 1 homolog	ENSG00000134330	IAH1	1	285148	7.52834	8.89896
ENSRNOG00000003865	-2.38923	4.64735	-6.01412	0.00030315	0.00243463	0.432648	Tmigd1	10	transmembrane and immunoglobulin domain containing 1	ENSG00000182271	TMIGD1	1	388364	3.51409	5.7806
ENSRNOG00000003855	-0.890918	7.17438	-6.01316	0.000303477	0.00243564	0.154079	Dnaja3	10	DnaJ heat shock protein family (Hsp40) member A3	ENSG00000103423	DNAJA3	1	9093	6.72229	7.62646
ENSRNOG00000020259	-0.953106	5.77847	-6.01083	0.000304273	0.00244042	0.165058	RGD1305347	5	similar to RIKEN cDNA 2610528J11	ENSG00000253313	C1orf210	1	149466	5.31544	6.24151
ENSRNOG00000002664	1.3606	3.8379	6.00967	0.000304671	0.00244136	0.438631	Emp2	10	epithelial membrane protein 2	ENSG00000213853	EMP2	1	2013	4.46645	3.20936
ENSRNOG00000050061	-1.13521	4.17858	-6.00889	0.000304938	0.00244136	0.429217	Mcart1	5	mitochondrial carrier triple repeat 1	ENSG00000122696	SLC25A51	1	92014	3.67783	4.67932
ENSRNOG00000050061	-1.13521	4.17858	-6.00889	0.000304938	0.00244136	0.429217	Mcart1	5	mitochondrial carrier triple repeat 1	ENSG00000141437	SLC25A52	1	147407	3.67783	4.67932
ENSRNOG00000006472	0.923465	4.66207	6.00872	0.000304994	0.00244136	0.274812	Hspa2	6	heat shock protein family A member 2	ENSG00000126803	HSPA2	1	3306	5.10752	4.21662
ENSRNOG00000003148	1.4651	6.5852	6.00421	0.000306545	0.00245055	0.144809	Timp2	10	TIMP metallopeptidase inhibitor 2	ENSG00000035862	TIMP2	1	7077	7.21089	5.95951
ENSRNOG00000020281	2.01873	1.83967	6.00062	0.000307788	0.00245782	0.759425	Kif22	1	kinesin family member 22	ENSG00000079616	KIF22	1	3835	2.73453	0.944814
ENSRNOG00000012290	-1.6725	5.11055	-5.99983	0.000308062	0.00245782	0.275165	Gchfr	3	GTP cyclohydrolase I feedback regulator	ENSG00000137880	GCHFR	1	2644	4.26777	5.95333
ENSRNOG00000007663	0.759866	8.76638	6.00026	0.000307914	0.00245782	0.271293	Rps6	5	ribosomal protein S6	ENSG00000137154	RPS6	1	6194	9.11503	8.41774
ENSRNOG00000019830	-3.00092	2.65885	-5.99875	0.000308437	0.00245919	0.764725	Hsd17b1	10	hydroxysteroid (17-beta) dehydrogenase 1	ENSG00000108786	HSD17B1	1	3292	1.1683	4.14941
ENSRNOG00000031824	0.771336	5.93748	5.99603	0.000309385	0.00246512	0.112576	Slc44a2	8	solute carrier family 44 member 2	ENSG00000129353	SLC44A2	1	57153	6.2951	5.57985
ENSRNOG00000042374	1.59743	2.61569	5.99431	0.000309984	0.00246685	0.645343	Tgif2	3	TGFB-induced factor homeobox 2	ENSG00000118707	TGIF2	1	60436	3.35331	1.87807
ENSRNOG00000011541	1.67396	6.6329	5.99424	0.000310008	0.00246685	0.141421	Cygb	10	cytoglobin	ENSG00000161544	CYGB	1	114757	7.35986	5.90594
ENSRNOG00000004540	2.71147	3.1365	5.99299	0.000310445	0.00246871	0.580902	Clec3b	8	C-type lectin domain family 3, member B	ENSG00000163815	CLEC3B	1	7123	4.33031	1.9427
ENSRNOG00000058545	1.32017	3.70042	5.98759	0.00031234	0.00248053	0.425373	Arhgap4	X	Rho GTPase activating protein 4	ENSG00000089820	ARHGAP4	1	393	4.39488	3.00597
ENSRNOG00000036833	1.15736	4.28042	5.98803	0.000312186	0.00248053	0.320048	Zfp385a	7	zinc finger protein 385A	ENSG00000161642	ZNF385A	1	25946	4.7947	3.76614
ENSRNOG00000050869	1.88505	2.25706	5.98652	0.000312718	0.0024819	0.68119	Cebpd	11	CCAAT/enhancer binding protein delta	ENSG00000221869	CEBPD	1	1052	3.1809	1.33323
ENSRNOG00000031916	1.38331	2.20556	5.98457	0.000313405	0.00248573	0.690176	Timeless	7	timeless circadian clock	ENSG00000111602	TIMELESS	1	8914	2.89977	1.51136
ENSRNOG00000005070	-1.58507	4.02341	-5.9835	0.000313783	0.00248585	0.465119	Spopl	3	speckle type BTB/POZ protein like	ENSG00000144228	SPOPL	1	339745	3.31326	4.73356
ENSRNOG00000013076	0.844172	4.44982	5.98337	0.00031383	0.00248585	0.268284	Csnk1e	7	casein kinase 1, epsilon	ENSG00000213923	CSNK1E	1	1454	4.88128	4.01836
ENSRNOG00000013076	0.844172	4.44982	5.98337	0.00031383	0.00248585	0.268284	Csnk1e	7	casein kinase 1, epsilon	ENSG00000283900	TPTEP2-CSNK1E	1	102800317	4.88128	4.01836
ENSRNOG00000056783	2.89842	-0.189338	5.98199	0.000314318	0.00248647	0.683176	Cd69	4	Cd69 molecule	ENSG00000110848	CD69	1	969	1.14147	-1.52015
ENSRNOG00000010591	0.674034	6.38511	5.98202	0.000314307	0.00248647	0.0917478	Kdm5a	4	lysine demethylase 5A	ENSG00000073614	KDM5A	1	5927	6.73283	6.0374
ENSRNOG00000056728	0.654672	6.26796	5.98073	0.000314764	0.00248838	0.0878556	G6pd	X	glucose-6-phosphate dehydrogenase	ENSG00000160211	G6PD	1	2539	6.56941	5.96652
ENSRNOG00000016253	-2.15421	8.09934	-5.97757	0.00031589	0.00249403	0.166686	Slc6a18	1	solute carrier family 6 member 18	ENSG00000164363	SLC6A18	1	348932	7.03533	9.16335
ENSRNOG00000019232	-0.839749	5.85962	-5.9778	0.000315807	0.00249403	0.112701	RGD1311345	17	similar to CG9752-PA	ENSG00000165118	C9orf64	1	84267	5.46967	6.24956
ENSRNOG00000014320	2.78914	-0.681183	5.9745	0.000316985	0.00250105	0.628964	Inhba	17	inhibin beta A subunit	ENSG00000122641	INHBA	1	3624	0.617215	-1.97958
ENSRNOG00000039858	1.36131	3.70002	5.97011	0.000318563	0.00251187	0.402424	Mfsd12	7	major facilitator superfamily domain containing 12	ENSG00000161091	MFSD12	1	126321	4.31376	3.08628
ENSRNOG00000016733	1.05408	4.66901	5.96898	0.000318968	0.00251343	0.214552	Rab13	2	RAB13, member RAS oncogene family	ENSG00000285641	AL358472.6	1	NA	5.14089	4.19713
ENSRNOG00000016733	1.05408	4.66901	5.96898	0.000318968	0.00251343	0.214552	Rab13	2	RAB13, member RAS oncogene family	ENSG00000143545	RAB13	1	5872	5.14089	4.19713
ENSRNOG00000023781	0.956479	7.17347	5.96825	0.000319231	0.00251387	0.120367	Plec	7	plectin	ENSG00000178209	PLEC	1	5339	7.66909	6.67785
ENSRNOG00000019482	1.88151	0.77522	5.96587	0.000320093	0.00251828	0.755218	Gnao1	19	G protein subunit alpha o1	ENSG00000087258	GNAO1	1	2775	1.66317	-0.112731
ENSRNOG00000013407	-2.75989	3.4329	-5.96555	0.000320206	0.00251828	0.62772	Slc5a11	1	solute carrier family 5 member 11	ENSG00000158865	SLC5A11	1	115584	2.06895	4.79685
ENSRNOG00000024243	2.13189	2.76062	5.9646	0.000320552	0.00251936	0.575608	Cadm4	1	cell adhesion molecule 4	ENSG00000105767	CADM4	1	199731	3.7854	1.73583
ENSRNOG00000047800	2.0064	2.16019	5.96206	0.000321472	0.00252496	0.661099	C5ar1	1	complement C5a receptor 1	ENSG00000197405	C5AR1	1	728	3.13802	1.18236
ENSRNOG00000024634	-2.90836	6.78733	-5.95749	0.000323139	0.00253477	0.135739	Gba3	14	glucosidase, beta, acid 3	ENSG00000249948	GBA3	1	57733	5.34525	8.22941
ENSRNOG00000011714	-1.09157	5.7448	-5.95768	0.000323068	0.00253477	0.111703	Sat2	10	spermidine/spermine N1-acetyltransferase family member 2	ENSG00000141504	SAT2	1	112483	5.189	6.3006
ENSRNOG00000007483	2.5733	0.470209	5.95474	0.000324147	0.00254104	0.740462	Ccnf	10	cyclin F	ENSG00000162063	CCNF	1	899	1.87388	-0.933463
ENSRNOG00000056457	-2.11575	7.58359	-5.95401	0.000324414	0.00254148	0.10641	Gpd1	7	glycerol-3-phosphate dehydrogenase 1	ENSG00000167588	GPD1	1	2819	6.53752	8.62967
ENSRNOG00000000704	2.68201	2.25321	5.94792	0.000326656	0.00254964	0.647714	Cmklr1	12	chemerin chemokine-like receptor 1	ENSG00000174600	CMKLR1	1	1240	3.48708	1.01933
ENSRNOG00000010257	0.81933	4.50924	5.94776	0.000326716	0.00254964	0.21903	Cuedc1	10	CUE domain containing 1	ENSG00000180891	CUEDC1	1	404093	4.88128	4.1372
ENSRNOG00000020182	1.03285	7.86161	5.95027	0.000325791	0.00254964	0.147799	Mvp	1	major vault protein	ENSG00000013364	MVP	1	9961	8.32557	7.39765
ENSRNOG00000026177	-1.84415	8.20272	-5.94815	0.000326573	0.00254964	0.142393	Mgam	4	maltase-glucoamylase	ENSG00000257335	MGAM	1	8972	7.37522	9.03022
ENSRNOG00000054896	-0.89936	5.41929	-5.94996	0.000325903	0.00254964	0.127046	Pex13	14	peroxisomal biogenesis factor 13	ENSG00000162928	PEX13	1	5194	4.95041	5.88817
ENSRNOG00000025679	0.667139	5.63024	5.94806	0.000326605	0.00254964	0.0695715	Stk40	5	serine/threonine kinase 40	ENSG00000196182	STK40	1	83931	5.96188	5.29861
ENSRNOG00000005046	0.919733	5.186	5.94345	0.000328317	0.00256049	0.108936	Tspan13	6	tetraspanin 13	ENSG00000106537	TSPAN13	1	27075	5.61921	4.75279
ENSRNOG00000026136	-1.00209	6.66655	-5.94193	0.00032888	0.00256324	0.0496484	Tnfaip8	18	TNF alpha induced protein 8	ENSG00000145779	TNFAIP8	1	25816	6.15337	7.17972
ENSRNOG00000005133	-0.973092	7.5595	-5.9405	0.000329416	0.00256577	0.0875049	Mapt	10	microtubule-associated protein tau	ENSG00000186868	MAPT	1	4137	7.08577	8.03323
ENSRNOG00000019203	2.0771	2.19604	5.93971	0.000329709	0.0025664	0.653798	Eya2	3	EYA transcriptional coactivator and phosphatase 2	ENSG00000064655	EYA2	1	2139	3.12683	1.26525
ENSRNOG00000018765	-0.883515	4.60467	-5.93571	0.000331209	0.00257643	0.242384	Pold4	1	DNA polymerase delta 4, accessory subunit	ENSG00000256514	AP003419.1	1	NA	4.15612	5.05321
ENSRNOG00000018765	-0.883515	4.60467	-5.93571	0.000331209	0.00257643	0.242384	Pold4	1	DNA polymerase delta 4, accessory subunit	ENSG00000175482	POLD4	1	57804	4.15612	5.05321
ENSRNOG00000062220	-2.19546	2.6118	-5.93253	0.000332406	0.00258329	0.669221	LOC679342	17	hypothetical protein LOC679342	ENSG00000188312	CENPP	1	401541	1.5474	3.67619
ENSRNOG00000000479	-1.43949	4.37056	-5.93223	0.000332517	0.00258329	0.309933	Kifc1	20	kinesin family member C1	ENSG00000237649	KIFC1	1	3833	3.75254	4.98859
ENSRNOG00000003338	1.89372	3.66195	5.93128	0.000332875	0.00258442	0.380986	Pmp22	10	peripheral myelin protein 22	ENSG00000109099	PMP22	1	5376	4.47799	2.84591
ENSRNOG00000054508	-2.4908	2.22864	-5.92892	0.000333768	0.00258969	0.703494	Foxp2	4	forkhead box P2	ENSG00000128573	FOXP2	1	93986	1.13235	3.32494
ENSRNOG00000029055	2.52938	0.069929	5.92396	0.000335656	0.00260101	0.673523	Ttk	8	Ttk protein kinase	ENSG00000112742	TTK	1	7272	1.30146	-1.16161
ENSRNOG00000021213	1.30573	4.67276	5.92412	0.000335593	0.00260101	0.162015	Lix1l	2	limb and CNS expressed 1 like	ENSG00000271601	LIX1L	1	128077	5.26495	4.08057
ENSRNOG00000005464	-0.931425	6.46799	-5.9223	0.00033629	0.0026026	0.0233348	Lgalsl	14	galectin-like	ENSG00000119862	LGALSL	1	29094	6.03678	6.89921
ENSRNOG00000006004	0.682074	6.0248	5.92284	0.00033608	0.0026026	0.0192983	Phc2	5	polyhomeotic homolog 2	ENSG00000134686	PHC2	1	1912	6.36213	5.68747
ENSRNOG00000033059	2.26345	2.75302	5.92092	0.000336814	0.00260333	0.530497	Galnt6	7	polypeptide N-acetylgalactosaminyltransferase 6	ENSG00000139629	GALNT6	1	11226	3.84473	1.66131
ENSRNOG00000014117	2.55685	3.09415	5.92148	0.000336602	0.00260333	0.486312	Hmox1	19	heme oxygenase 1	ENSG00000100292	HMOX1	1	3162	4.28205	1.90625
ENSRNOG00000024237	2.21589	1.12003	5.91795	0.000337955	0.00261028	0.701195	Scel	15	sciellin	ENSG00000136155	SCEL	1	8796	2.29934	-0.0592912
ENSRNOG00000002903	0.627375	5.1737	5.91746	0.000338143	0.00261028	0.0767047	Specc1	10	sperm antigen with calponin homology and coiled-coil domains 1	ENSG00000128487	SPECC1	1	92521	5.48504	4.86236
ENSRNOG00000032690	0.897844	3.99074	5.91022	0.000340935	0.00263016	0.277469	Ube2e2	15	ubiquitin-conjugating enzyme E2E 2	ENSG00000182247	UBE2E2	1	7325	4.40969	3.57178
ENSRNOG00000021355	-1.08696	3.2857	-5.90729	0.000342075	0.00263194	0.484578	Car6	5	carbonic anhydrase 6	ENSG00000131686	CA6	1	765	2.75166	3.81974
ENSRNOG00000012512	1.13937	3.38522	5.9083	0.000341682	0.00263194	0.405908	Nexn	2	nexilin (F actin binding protein)	ENSG00000162614	NEXN	1	91624	3.92015	2.85029
ENSRNOG00000056297	0.954098	4.86316	5.90618	0.000342505	0.00263194	0.107199	Fmnl3	7	formin-like 3	ENSG00000161791	FMNL3	1	91010	5.2935	4.43282
ENSRNOG00000001056	0.894568	4.92176	5.90794	0.000341821	0.00263194	0.103463	Snapc2	12	small nuclear RNA activating complex, polypeptide 2	ENSG00000104976	SNAPC2	1	6618	5.33387	4.50964
ENSRNOG00000009266	0.611875	7.40703	5.90592	0.000342607	0.00263194	0.0509732	Anp32b	5	acidic nuclear phosphoprotein 32 family member B	ENSG00000136938	ANP32B	1	10541	7.69138	7.12267
ENSRNOG00000061237	-2.25789	7.35442	-5.909	0.000341408	0.00263194	0.0457008	Dio1	5	deiodinase, iodothyronine, type I	ENSG00000211452	DIO1	1	1733	6.25376	8.45509
ENSRNOG00000021274	1.11627	5.60981	5.90573	0.000342683	0.00263194	0.0292285	Fermt1	3	fermitin family member 1	ENSG00000101311	FERMT1	1	55612	6.20397	5.01565
ENSRNOG00000026420	-1.95545	1.54391	-5.90473	0.000343074	0.00263327	0.691234	Iqcg	11	IQ motif containing G	ENSG00000114473	IQCG	1	84223	0.61767	2.47016
ENSRNOG00000007545	1.72789	3.16115	5.90412	0.000343312	0.00263343	0.443572	Angptl4	7	angiopoietin-like 4	ENSG00000167772	ANGPTL4	1	51129	4.00419	2.31811
ENSRNOG00000000850	-1.98141	7.3015	-5.90183	0.000344208	0.00263546	0.0315049	Apom	20	apolipoprotein M	ENSG00000204444	APOM	1	55937	6.28044	8.32256
ENSRNOG00000047339	-0.616382	7.05057	-5.90282	0.000343819	0.00263546	0.0116877	Pja1	X	praja ring finger ubiquitin ligase 1	ENSG00000181191	PJA1	1	64219	6.74388	7.35726
ENSRNOG00000020657	0.701467	6.38394	5.90177	0.000344228	0.00263546	-0.0062615	Shc1	2	SHC adaptor protein 1	ENSG00000160691	SHC1	1	6464	6.705	6.06289
ENSRNOG00000018755	-2.41447	8.63393	-5.89843	0.000345542	0.00264386	0.108912	Acss2	3	acyl-CoA synthetase short-chain family member 2	ENSG00000131069	ACSS2	1	55902	7.45132	9.81654
ENSRNOG00000017901	-2.70431	8.01782	-5.89643	0.000346329	0.0026482	0.06523	Acy3	1	aminoacylase 3	ENSG00000132744	ACY3	1	91703	6.71341	9.32223
ENSRNOG00000009019	-0.747279	5.7739	-5.8903	0.000348756	0.00266508	0.00713816	Slc6a6	4	solute carrier family 6 member 6	ENSG00000131389	SLC6A6	1	6533	5.37469	6.17311
ENSRNOG00000000842	0.817536	5.84704	5.88481	0.000350947	0.00268014	-0.0191744	Ddah2	20	dimethylarginine dimethylaminohydrolase 2	ENSG00000213722	DDAH2	1	23564	6.20849	5.48559
ENSRNOG00000006010	-2.44235	5.33944	-5.88272	0.000351786	0.00268486	0.152522	RGD1566368	8	similar to Solute carrier family 6 (neurotransmitter transporter), member 20	ENSG00000163817	SLC6A20	1	54716	4.21319	6.4657
ENSRNOG00000010958	-0.725848	7.20849	-5.88012	0.000352831	0.00269114	-0.00727085	Prdx3	1	peroxiredoxin 3	ENSG00000165672	PRDX3	1	10935	6.83017	7.58681
ENSRNOG00000006523	-0.778164	5.52637	-5.87808	0.000353653	0.00269572	0.0224202	Atl2	6	atlastin GTPase 2	ENSG00000119787	ATL2	1	64225	5.1743	5.87843
ENSRNOG00000008099	1.06227	3.56919	5.87546	0.000354712	0.00270209	0.307636	Galnt12	5	polypeptide N-acetylgalactosaminyltransferase 12	ENSG00000119514	GALNT12	1	79695	4.15135	2.98702
ENSRNOG00000019264	0.648543	6.15225	5.87167	0.000356247	0.00271208	-0.0458877	Ltbr	4	lymphotoxin beta receptor	ENSG00000111321	LTBR	1	4055	6.44187	5.86262
ENSRNOG00000009572	1.78308	2.7301	5.87047	0.000356738	0.00271412	0.464458	Hgfac	14	HGF activator	ENSG00000109758	HGFAC	1	3083	3.59128	1.86892
ENSRNOG00000009001	-0.867564	6.66501	-5.86761	0.000357904	0.00272128	-0.0433248	Mtss1	7	MTSS1, I-BAR domain containing	ENSG00000170873	MTSS1	1	9788	6.28367	7.04634
ENSRNOG00000013631	0.703708	5.40856	5.86634	0.000358425	0.00272353	-0.0132035	Slc31a2	5	solute carrier family 31 member 2	ENSG00000136867	SLC31A2	1	1318	5.76255	5.05457
ENSRNOG00000015691	2.00822	0.719879	5.86432	0.000359253	0.00272642	0.645814	Fam212b	2	family with sequence similarity 212, member B	ENSG00000197852	INKA2	1	55924	1.66063	-0.220875
ENSRNOG00000015691	2.00822	0.719879	5.86432	0.000359253	0.00272642	0.645814	Fam212b	2	family with sequence similarity 212, member B	ENSG00000197852	INKA2	1	101928718	1.66063	-0.220875
ENSRNOG00000020769	-0.967091	5.66994	-5.86464	0.000359122	0.00272642	-0.00536866	Crebrf	10	CREB3 regulatory factor	ENSG00000164463	CREBRF	1	153222	5.24357	6.09631
ENSRNOG00000033169	-2.0904	5.1951	-5.86337	0.000359646	0.00272769	0.121515	Cpeb4	10	cytoplasmic polyadenylation element binding protein 4	ENSG00000113742	CPEB4	1	80315	4.31747	6.07273
ENSRNOG00000030568	1.30293	2.80084	5.8609	0.000360661	0.00273368	0.442478	Rgs12	14	regulator of G-protein signaling 12	ENSG00000159788	RGS12	1	6002	3.44715	2.15452
ENSRNOG00000018824	1.14365	3.62797	5.85659	0.000362445	0.00274505	0.28184	Slc7a5	19	solute carrier family 7 member 5	ENSG00000103257	SLC7A5	1	8140	4.1722	3.08373
ENSRNOG00000009845	-1.31926	8.96029	-5.85618	0.000362614	0.00274505	0.0867558	Acadm	2	acyl-CoA dehydrogenase, C-4 to C-12 straight chain	ENSG00000117054	ACADM	1	34	8.316	9.60458
ENSRNOG00000018114	-0.935486	7.48248	-5.8549	0.000363146	0.00274736	-0.0209013	Acadvl	10	acyl-CoA dehydrogenase, very long chain	ENSG00000072778	ACADVL	1	37	7.02897	7.93599
ENSRNOG00000034015	0.700692	7.27767	5.85326	0.000363826	0.0027508	-0.0192212	Capn2	13	calpain 2	ENSG00000162909	CAPN2	1	824	7.61607	6.93926
ENSRNOG00000007980	-3.64143	2.09297	-5.84782	0.000366102	0.00276109	0.629304	Anxa13	7	annexin A13	ENSG00000104537	ANXA13	1	312	0.368624	3.81731
ENSRNOG00000004699	2.45176	2.2441	5.84838	0.000365866	0.00276109	0.541253	Fibin	3	fin bud initiation factor homolog (zebrafish)	ENSG00000176971	FIBIN	1	387758	3.29121	1.19698
ENSRNOG00000007905	-0.682454	4.75533	-5.84729	0.000366325	0.00276109	0.0920784	Itga7	7	integrin subunit alpha 7	ENSG00000135424	ITGA7	1	3679	4.43004	5.08062
ENSRNOG00000017952	0.72889	7.2863	5.84804	0.000366009	0.00276109	-0.0253567	2002-09-01	9	septin 2	ENSG00000168385	SEPTIN2	1	4735	7.66001	6.9126
ENSRNOG00000034134	0.713342	5.54887	5.84782	0.000366099	0.00276109	-0.0473763	Cpm	7	carboxypeptidase M	ENSG00000135678	CPM	1	1368	5.92218	5.17556
ENSRNOG00000024603	0.778486	5.99345	5.84658	0.00036662	0.0027616	-0.0722332	Rps15	7	ribosomal protein S15	ENSG00000115268	RPS15	1	6209	6.33646	5.65045
ENSRNOG00000017914	1.69074	4.78808	5.84511	0.000367238	0.00276196	0.0566351	Prkcdbp	1	protein kinase C, delta binding protein	ENSG00000170955	CAVIN3	1	112464	5.50955	4.06661
ENSRNOG00000019892	0.754196	6.55681	5.84489	0.00036733	0.00276196	-0.0698618	Lrrfip1	9	LRR binding FLII interacting protein 1	ENSG00000124831	LRRFIP1	1	9208	6.96834	6.14528
ENSRNOG00000003844	-0.593233	6.73061	-5.84484	0.000367351	0.00276196	-0.0733234	Dhx15	14	DEAH-box helicase 15	ENSG00000109606	DHX15	1	1665	6.45112	7.0101
ENSRNOG00000001256	-0.746445	5.28893	-5.84331	0.000367998	0.00276511	0.0038904	Atxn2	12	ataxin 2	ENSG00000204842	ATXN2	1	6311	4.95885	5.61901
ENSRNOG00000024461	3.78172	0.271858	5.84204	0.000368534	0.00276742	0.58538	2011-03-01	2	membrane associated ring-CH-type finger 11	ENSG00000183654	MARCHF11	1	441061	2.12738	-1.58366
ENSRNOG00000037518	-1.37513	4.99653	-5.84098	0.000368979	0.00276906	0.0762367	Hyi	5	hydroxypyruvate isomerase	ENSG00000178922	HYI	1	81888	4.3269	5.66617
ENSRNOG00000023352	2.09849	0.954813	5.83908	0.000369787	0.00277218	0.618577	Fam78a	3	family with sequence similarity 78, member A	ENSG00000126882	FAM78A	1	286336	1.96654	-0.0569135
ENSRNOG00000027204	2.05722	1.99715	5.83863	0.000369975	0.00277218	0.537156	Map6	1	microtubule-associated protein 6	ENSG00000171533	MAP6	1	4135	3.04489	0.949424
ENSRNOG00000012878	-1.47227	3.09907	-5.83838	0.000370081	0.00277218	0.452981	Atp7b	16	ATPase copper transporting beta	ENSG00000123191	ATP7B	1	540	2.41967	3.77847
ENSRNOG00000001252	2.40463	1.57515	5.83459	0.000371694	0.00278255	0.588119	Chst12	12	carbohydrate sulfotransferase 12	ENSG00000136213	CHST12	1	55501	2.64961	0.500694
ENSRNOG00000000638	1.6533	1.29996	5.83182	0.000372878	0.00278701	0.598023	Zfp365	20	zinc finger protein 365	ENSG00000138311	ZNF365	1	22891	2.12988	0.47004
ENSRNOG00000007369	1.87533	2.01753	5.83258	0.000372553	0.00278701	0.550873	Shisa4	13	shisa family member 4	ENSG00000198892	SHISA4	1	149345	2.86134	1.17372
ENSRNOG00000018336	-0.957325	8.02072	-5.83158	0.000372979	0.00278701	-0.0131317	Eps8l2	1	EPS8-like 2	ENSG00000177106	EPS8L2	1	64787	7.56489	8.47655
ENSRNOG00000004921	2.27138	1.08999	5.83097	0.00037324	0.00278724	0.609864	Nusap1	3	nucleolar and spindle associated protein 1	ENSG00000137804	NUSAP1	1	51203	2.08544	0.094547
ENSRNOG00000004921	2.27138	1.08999	5.83097	0.00037324	0.00278724	0.609864	Nusap1	3	nucleolar and spindle associated protein 1	ENSG00000285920	AC087721.2	1	NA	2.08544	0.094547
ENSRNOG00000020552	4.09174	-1.14092	5.82719	0.000374865	0.00279404	0.487702	Fosl1	1	FOS like 1, AP-1 transcription factor subunit	ENSG00000175592	FOSL1	1	8061	0.733851	-3.01568
ENSRNOG00000005332	1.42773	3.22475	5.82671	0.000375071	0.00279404	0.32104	Csdc2	7	cold shock domain containing C2	ENSG00000172346	CSDC2	1	27254	3.89475	2.55476
ENSRNOG00000000406	-2.00752	4.536	-5.82767	0.000374657	0.00279404	0.192356	Ros1	20	ROS proto-oncogene 1 , receptor tyrosine kinase	ENSG00000047936	ROS1	1	6098	3.68803	5.38397
ENSRNOG00000015970	-0.691438	5.94456	-5.82721	0.000374854	0.00279404	-0.0819204	Tbc1d13	3	TBC1 domain family, member 13	ENSG00000107021	TBC1D13	1	54662	5.58853	6.30058
ENSRNOG00000019778	1.23752	7.06567	5.82577	0.000375474	0.00279532	-0.0579812	Ptrf	10	polymerase I and transcript release factor	ENSG00000177469	CAVIN1	1	284119	7.59852	6.53282
ENSRNOG00000015308	3.06149	-0.0903389	5.82447	0.000376035	0.00279607	0.556515	Pbk	15	PDZ binding kinase	ENSG00000168078	PBK	1	55872	1.41913	-1.59981
ENSRNOG00000055579	-0.766416	9.05293	-5.82467	0.000375948	0.00279607	0.0594586	Tmbim6	7	transmembrane BAX inhibitor motif containing 6	ENSG00000139644	TMBIM6	1	7009	8.6428	9.46305
ENSRNOG00000008337	-5.59802	-0.574076	-5.82173	0.000377221	0.00280146	0.378344	Gjd2	3	gap junction protein, delta 2	ENSG00000159248	GJD2	1	57369	-3.27993	2.13178
ENSRNOG00000011517	-0.646947	7.37984	-5.82178	0.000377201	0.00280146	-0.0683003	Tnfrsf21	9	TNF receptor superfamily member 21	ENSG00000146072	TNFRSF21	1	27242	7.0801	7.67957
ENSRNOG00000018964	-1.58142	8.19076	-5.81967	0.000378115	0.00280638	-0.0211429	Gss	3	glutathione synthetase	ENSG00000100983	GSS	1	2937	7.37767	9.00384
ENSRNOG00000031032	0.881902	4.72923	5.81856	0.000378599	0.00280825	0.0213949	Hmgn3	8	high mobility group nucleosomal binding domain 3	ENSG00000118418	HMGN3	1	9324	5.21835	4.24012
ENSRNOG00000003736	2.56884	4.81409	5.81698	0.000379287	0.00281163	0.0474472	Col5a2	9	collagen type V alpha 2 chain	ENSG00000204262	COL5A2	1	1290	6.04732	3.58087
ENSRNOG00000002122	1.266	3.68722	5.81567	0.000379856	0.00281241	0.216495	Lrrc8c	14	leucine rich repeat containing 8 family, member C	ENSG00000171488	LRRC8C	1	84230	4.28152	3.09292
ENSRNOG00000008113	0.757889	7.16715	5.81585	0.000379778	0.00281241	-0.0739726	RGD1561149	5	similar to mKIAA1522 protein	ENSG00000162522	KIAA1522	1	57648	7.5211	6.8132
ENSRNOG00000019481	-5.44282	-0.890482	-5.81178	0.00038156	0.00282331	0.362471	Cyp8b1	8	cytochrome P450, family 8, subfamily b, polypeptide 1	ENSG00000180432	CYP8B1	1	1582	-3.37279	1.59183
ENSRNOG00000003915	-0.891179	3.91351	-5.81046	0.000382141	0.00282588	0.226485	Tmem206	13	transmembrane protein 206	ENSG00000065600	PACC1	1	55248	3.48427	4.34275
ENSRNOG00000014166	2.36848	4.3419	5.8082	0.000383136	0.00283152	0.130728	Smoc2	1	SPARC related modular calcium binding 2	ENSG00000112562	SMOC2	1	64094	5.40898	3.27482
ENSRNOG00000000588	-0.815182	3.78693	-5.8074	0.000383487	0.00283191	0.243147	Slc16a10	20	solute carrier family 16 member 10	ENSG00000112394	SLC16A10	1	117247	3.38298	4.19089
ENSRNOG00000054959	0.713357	4.64034	5.8064	0.00038393	0.00283191	0.0166305	Mmp11	AABR07024104.1	matrix metallopeptidase 11	ENSG00000099953	MMP11	1	4320	4.98863	4.29205
ENSRNOG00000001249	2.85825	6.13638	5.80609	0.000384063	0.00283191	-0.0391851	Col6a1	20	collagen type VI alpha 1 chain	ENSG00000142156	COL6A1	1	1291	7.38259	4.89018
ENSRNOG00000000975	-0.997097	6.43449	-5.80596	0.000384122	0.00283191	-0.11864	Mcoln1	12	mucolipin 1	ENSG00000090674	MCOLN1	1	57192	5.92414	6.94484
ENSRNOG00000008052	0.611134	4.98896	5.80508	0.000384514	0.00283308	-0.0332915	Atp13a2	5	ATPase 13A2	ENSG00000159363	ATP13A2	1	23400	5.30428	4.67363
ENSRNOG00000013564	1.85842	1.66359	5.8027	0.000385566	0.00283911	0.541033	Dok3	17	docking protein 3	ENSG00000146094	DOK3	1	79930	2.54198	0.785204
ENSRNOG00000000582	-1.16232	3.4024	-5.80143	0.00038613	0.00284154	0.344125	Ddo	20	D-aspartate oxidase	ENSG00000203797	DDO	1	8528	2.84365	3.96116
ENSRNOG00000007722	1.96863	1.04887	5.80088	0.000386373	0.0028416	0.577174	Fam57a	10	family with sequence similarity 57, member A	ENSG00000167695	TLCD3A	1	79850	1.94927	0.148473
ENSRNOG00000043077	0.903041	4.0784	5.7993	0.000387078	0.00284334	0.121281	Zfpm1	19	zinc finger protein, multitype 1	ENSG00000179588	ZFPM1	1	161882	4.48177	3.67503
ENSRNOG00000017481	-0.865673	7.58257	-5.79621	0.000388457	0.00285174	-0.0868878	Sucla2	15	succinate-CoA ligase ADP-forming beta subunit	ENSG00000136143	SUCLA2	1	8803	7.14611	8.01903
ENSRNOG00000006237	3.3503	-1.38659	5.7949	0.000389045	0.002852	0.443709	Gpr37l1	13	G protein-coupled receptor 37-like 1	ENSG00000170075	GPR37L1	1	9283	0.397566	-3.17075
ENSRNOG00000023972	1.41467	8.03134	5.79456	0.000389197	0.002852	-0.0255378	Col4a2	16	collagen type IV alpha 2 chain	ENSG00000134871	COL4A2	1	1284	8.66662	7.39606
ENSRNOG00000006785	-0.698366	6.88255	-5.79556	0.00038875	0.002852	-0.129143	Dcaf8	13	DDB1 and CUL4 associated factor 8	ENSG00000132716	DCAF8	1	50717	6.55651	7.20859
ENSRNOG00000026295	1.47274	1.77132	5.79346	0.000389692	0.0028539	0.519129	Rbpjl	3	recombination signal binding protein for immunoglobulin kappa J region-like	ENSG00000124232	RBPJL	1	11317	2.54635	0.996294
ENSRNOG00000049361	2.98984	2.10723	5.7924	0.000390168	0.00285503	0.494048	Gas7	10	growth arrest specific 7	ENSG00000007237	GAS7	1	8522	3.55417	0.660284
ENSRNOG00000000435	-0.755535	5.871	-5.79207	0.000390317	0.00285503	-0.118376	Ppt2	20	palmitoyl-protein thioesterase 2	ENSG00000221988	PPT2	1	9374	5.48372	6.25828
ENSRNOG00000000435	-0.755535	5.871	-5.79207	0.000390317	0.00285503	-0.118376	Ppt2	20	palmitoyl-protein thioesterase 2	ENSG00000258388	PPT2-EGFL8	1	NA	5.48372	6.25828
ENSRNOG00000014294	0.612357	5.44123	5.78494	0.000393539	0.00287687	-0.116728	Ptpn6	4	protein tyrosine phosphatase, non-receptor type 6	ENSG00000111679	PTPN6	1	5777	5.75199	5.13047
ENSRNOG00000016592	1.05788	8.02595	5.78344	0.000394219	0.0028801	-0.0472544	Gnai2	8	G protein subunit alpha i2	ENSG00000114353	GNAI2	1	2771	8.48704	7.56486
ENSRNOG00000014948	-2.78216	7.13348	-5.78199	0.000394878	0.00288318	-0.0948443	Osgin1	19	oxidative stress induced growth inhibitor 1	ENSG00000140961	OSGIN1	1	29948	5.8115	8.45545
ENSRNOG00000024595	-2.27417	2.26494	-5.77372	0.000398666	0.0029086	0.523061	Cers6	3	ceramide synthase 6	ENSG00000172292	CERS6	1	253782	1.27508	3.25481
ENSRNOG00000020836	-0.908374	5.49278	-5.77335	0.000398839	0.0029086	-0.0947028	Rorc	2	RAR-related orphan receptor C	ENSG00000143365	RORC	1	6097	5.00985	5.97571
ENSRNOG00000054889	-0.766822	4.86172	-5.76955	0.000400593	0.00291964	-0.0159099	Wdr72	8	WD repeat domain 72	ENSG00000166415	WDR72	1	256764	4.50486	5.21858
ENSRNOG00000005115	2.2999	-0.0617728	5.76867	0.000401002	0.00292086	0.513696	Asf1b	19	anti-silencing function 1B histone chaperone	ENSG00000105011	ASF1B	1	55723	1.18871	-1.31226
ENSRNOG00000014838	1.85274	1.81113	5.76726	0.000401652	0.00292215	0.491995	Glipr2	5	GLI pathogenesis-related 2	ENSG00000122694	GLIPR2	1	152007	2.6296	0.992656
ENSRNOG00000008271	-0.760563	7.35548	-5.76725	0.00040166	0.00292215	-0.138185	Fam91a1	7	family with sequence similarity 91, member A1	ENSG00000176853	FAM91A1	1	157769	7.00598	7.70498
ENSRNOG00000032508	-5.38092	-0.471125	-5.76545	0.000402494	0.00292471	0.328478	Acot5	6	acyl-CoA thioesterase 5	ENSG00000184227	ACOT1	1	641371	-2.95407	2.01182
ENSRNOG00000032508	-5.38092	-0.471125	-5.76545	0.000402494	0.00292471	0.328478	Acot5	6	acyl-CoA thioesterase 5	ENSG00000119673	ACOT2	1	10965	-2.95407	2.01182
ENSRNOG00000055524	0.694871	5.31639	5.76546	0.000402491	0.00292471	-0.12686	Trip10	9	thyroid hormone receptor interactor 10	ENSG00000125733	TRIP10	1	9322	5.64447	4.98831
ENSRNOG00000054957	6.16812	-0.325291	5.76247	0.000403883	0.00293282	0.502951	Sfrp4	17	secreted frizzled-related protein 4	ENSG00000106483	SFRP4	1	6424	2.51591	-3.16649
ENSRNOG00000002115	-1.1824	8.87839	-5.76202	0.000404094	0.00293282	-0.0367363	Sod1	11	superoxide dismutase 1, soluble	ENSG00000142168	SOD1	1	6647	8.29454	9.46224
ENSRNOG00000018159	0.605535	7.79298	5.76132	0.000404423	0.00293324	-0.0994308	Anxa4	4	annexin A4	ENSG00000196975	ANXA4	1	307	8.07645	7.5095
ENSRNOG00000006399	-0.737411	7.57494	-5.76087	0.000404634	0.00293324	-0.131809	Synj2bp	6	synaptojanin 2 binding protein	ENSG00000213463	SYNJ2BP	1	55333	7.20183	7.94805
ENSRNOG00000029922	-1.34466	3.65322	-5.76023	0.000404934	0.00293365	0.247587	Tpk1	4	thiamin pyrophosphokinase 1	ENSG00000196511	TPK1	1	27010	3.04404	4.2624
ENSRNOG00000026235	3.43793	1.57128	5.75903	0.000405495	0.00293506	0.508927	Hk3	17	hexokinase 3	ENSG00000160883	HK3	1	3101	3.18133	-0.0387741
ENSRNOG00000010332	1.90957	2.1657	5.75878	0.000405612	0.00293506	0.423373	Nipsnap3b	5	nipsnap homolog 3B	ENSG00000136783	NIPSNAP3A	1	25934	3.26179	1.06961
ENSRNOG00000053850	-2.78776	4.04489	-5.75812	0.000405923	0.00293557	0.278699	Rdh5	7	retinol dehydrogenase 5	ENSG00000135437	RDH5	1	5959	2.69708	5.3927
ENSRNOG00000017237	1.10455	3.90802	5.75743	0.000406247	0.00293615	0.0940829	Lama1	9	laminin subunit alpha 1	ENSG00000101680	LAMA1	1	284217	4.47879	3.33726
ENSRNOG00000018126	0.949787	4.99154	5.7555	0.000407152	0.00293934	-0.100086	Abca1	5	ATP binding cassette subfamily A member 1	ENSG00000165029	ABCA1	1	19	5.50093	4.48216
ENSRNOG00000003847	-0.601384	5.68978	-5.75535	0.000407226	0.00293934	-0.155655	Gid4	10	GID complex subunit 4	ENSG00000141034	GID4	1	79018	5.40407	5.9755
ENSRNOG00000031965	0.729541	6.00267	5.75495	0.000407414	0.00293934	-0.18751	Impdh2	8	inosine monophosphate dehydrogenase 2	ENSG00000178035	IMPDH2	1	3615	6.33307	5.67228
ENSRNOG00000034089	-2.25437	2.21362	-5.75135	0.000409117	0.0029448	0.494896	Ttc21a	8	tetratricopeptide repeat domain 21A	ENSG00000168026	TTC21A	1	199223	1.2262	3.20103
ENSRNOG00000019660	4.57973	0.310603	5.74969	0.000409904	0.0029448	0.489389	Spib	1	Spi-B transcription factor	ENSG00000142539	AC020909.1	1	NA	2.45574	-1.83454
ENSRNOG00000019660	4.57973	0.310603	5.74969	0.000409904	0.0029448	0.489389	Spib	1	Spi-B transcription factor	ENSG00000269404	SPIB	1	6689	2.45574	-1.83454
ENSRNOG00000060130	2.89988	-0.389369	5.74946	0.000410011	0.0029448	0.46255	Ypel4	3	yippee-like 4	ENSG00000166793	YPEL4	1	219539	1.15185	-1.93059
ENSRNOG00000037757	3.50019	-0.484611	5.74925	0.000410112	0.0029448	0.445999	Fam26f	20	family with sequence similarity 26, member F	ENSG00000188820	CALHM6	1	441168	1.15583	-2.12505
ENSRNOG00000002599	1.73961	2.09769	5.75089	0.000409333	0.0029448	0.432561	Grap	10	GRB2-related adaptor protein	ENSG00000189152	GRAPL	0	400581	2.97873	1.21665
ENSRNOG00000002599	1.73961	2.09769	5.75089	0.000409333	0.0029448	0.432561	Grap	10	GRB2-related adaptor protein	ENSG00000154016	GRAP	1	10750	2.97873	1.21665
ENSRNOG00000017819	2.32912	2.93408	5.74951	0.000409989	0.0029448	0.292259	Cd14	18	CD14 molecule	ENSG00000170458	CD14	1	929	4.05036	1.81781
ENSRNOG00000004273	1.76045	3.9399	5.75171	0.000408942	0.0029448	0.107598	Ifitm1	1	interferon induced transmembrane protein 1	ENSG00000185885	IFITM1	1	8519	4.70941	3.1704
ENSRNOG00000004273	1.76045	3.9399	5.75171	0.000408942	0.0029448	0.107598	Ifitm1	1	interferon induced transmembrane protein 1	ENSG00000185201	IFITM2	1	10581	4.70941	3.1704
ENSRNOG00000004273	1.76045	3.9399	5.75171	0.000408942	0.0029448	0.107598	Ifitm1	1	interferon induced transmembrane protein 1	ENSG00000142089	IFITM3	0	10410	4.70941	3.1704
ENSRNOG00000017382	0.828407	4.71516	5.74976	0.000409868	0.0029448	-0.0627602	Snx33	8	sorting nexin 33	ENSG00000173548	SNX33	1	257364	5.10365	4.32667
ENSRNOG00000008015	2.22881	2.96484	5.74804	0.000410685	0.00294717	0.319673	Fos	6	FBJ osteosarcoma oncogene	ENSG00000170345	FOS	1	2353	4.06423	1.86544
ENSRNOG00000015493	-0.96028	4.91849	-5.74703	0.000411166	0.00294888	-0.0441576	Emx1	4	empty spiracles homeobox 1	ENSG00000135638	EMX1	1	2016	4.46161	5.37537
ENSRNOG00000011205	3.01386	-0.712449	5.74583	0.000411737	0.00295123	0.426313	Ccl3	10	C-C motif chemokine ligand 3	ENSG00000277632	CCL3	1	6348	0.816015	-2.24091
ENSRNOG00000011205	3.01386	-0.712449	5.74583	0.000411737	0.00295123	0.426313	Ccl3	10	C-C motif chemokine ligand 3	ENSG00000276085	CCL3L3	1	6349	0.816015	-2.24091
ENSRNOG00000011205	3.01386	-0.712449	5.74583	0.000411737	0.00295123	0.426313	Ccl3	10	C-C motif chemokine ligand 3	ENSG00000276085	CCL3L3	1	414062	0.816015	-2.24091
ENSRNOG00000011205	3.01386	-0.712449	5.74583	0.000411737	0.00295123	0.426313	Ccl3	10	C-C motif chemokine ligand 3	ENSG00000275385	CCL18	0	6362	0.816015	-2.24091
ENSRNOG00000047023	-1.43815	7.36316	-5.74512	0.000412077	0.00295192	-0.165055	Aldh1l1	4	aldehyde dehydrogenase 1 family, member L1	ENSG00000144908	ALDH1L1	1	10840	6.64656	8.07977
ENSRNOG00000039596	-2.59607	2.55882	-5.74085	0.000414122	0.00296133	0.475171	Prob1	18	proline rich basic protein 1	ENSG00000228672	PROB1	1	389333	1.30299	3.81465
ENSRNOG00000052775	-0.722202	5.30919	-5.74123	0.000413939	0.00296133	-0.127359	RGD1305938	2	similar to expressed sequence AW549877	ENSG00000205765	C5orf51	1	285636	4.96901	5.64936
ENSRNOG00000002227	0.608207	5.71519	5.74095	0.000414075	0.00296133	-0.193601	Kit	14	KIT proto-oncogene receptor tyrosine kinase	ENSG00000157404	KIT	1	3815	6.04475	5.38563
ENSRNOG00000048723	0.794987	5.52534	5.73479	0.000417043	0.00298045	-0.183847	Pros1	7	protein S (alpha)	ENSG00000184500	PROS1	1	5627	5.88026	5.17041
ENSRNOG00000001009	-0.873882	5.66308	-5.73205	0.000418368	0.00298817	-0.172036	Bri3	12	brain protein I3	ENSG00000164713	BRI3	1	25798	5.24538	6.08078
ENSRNOG00000059801	0.738466	6.38502	5.73017	0.000419283	0.00299294	-0.218872	Lima1	7	LIM domain and actin binding 1	ENSG00000050405	LIMA1	1	51474	6.75144	6.01859
ENSRNOG00000001124	1.81039	0.894923	5.7287	0.000419997	0.00299319	0.497615	Rnft2	12	ring finger protein, transmembrane 2	ENSG00000135119	RNFT2	1	84900	1.79135	-0.00150748
ENSRNOG00000047503	-1.89908	2.52058	-5.72858	0.000420058	0.00299319	0.424123	Apoc3	8	apolipoprotein C3	ENSG00000110245	APOC3	1	345	1.48396	3.5572
ENSRNOG00000003201	0.869964	9.59096	5.72867	0.000420012	0.00299319	0.00581679	Rps4x	X	ribosomal protein S4, X-linked	ENSG00000198034	RPS4X	1	6191	9.97747	9.20445
ENSRNOG00000047896	0.725337	6.06452	5.72569	0.000421468	0.00300148	-0.225855	Kctd10	12	potassium channel tetramerization domain containing 10	ENSG00000110906	KCTD10	1	83892	6.4004	5.72865
ENSRNOG00000036942	1.78599	2.06305	5.71825	0.000425129	0.00302577	0.401469	Tnfrsf9	5	TNF receptor superfamily member 9	ENSG00000049249	TNFRSF9	1	3604	2.88632	1.23977
ENSRNOG00000018279	-1.25834	7.39567	-5.71728	0.000425607	0.0030274	-0.200338	Sfxn1	17	sideroflexin 1	ENSG00000164466	SFXN1	1	94081	6.7692	8.02213
ENSRNOG00000010240	1.87358	1.68205	5.71379	0.000427337	0.00303082	0.438487	Fam46a	8	family with sequence similarity 46, member A	ENSG00000112773	TENT5A	1	55603	2.59823	0.765869
ENSRNOG00000046254	1.50184	3.52127	5.71456	0.000426954	0.00303082	0.139131	Adgre1	9	adhesion G protein-coupled receptor E1	ENSG00000174837	ADGRE1	1	2015	4.16988	2.87266
ENSRNOG00000056678	1.33913	3.83967	5.71392	0.000427275	0.00303082	0.0697744	Nckap5l	7	NCK-associated protein 5-like	ENSG00000167566	NCKAP5L	1	57701	4.47213	3.20721
ENSRNOG00000051232	-0.702298	5.95782	-5.7142	0.000427133	0.00303082	-0.224398	Gbe1	11	1,4-alpha-glucan branching enzyme 1	ENSG00000114480	GBE1	1	2632	5.59787	6.31778
ENSRNOG00000005573	0.855419	5.74855	5.71569	0.000426396	0.00303082	-0.224998	Ntn4	7	netrin 4	ENSG00000074527	NTN4	1	59277	6.16118	5.33592
ENSRNOG00000019215	1.29966	2.68679	5.70837	0.000430038	0.0030482	0.296876	LOC100911730	1	CD151 antigen-like	ENSG00000177697	CD151	1	977	3.27563	2.09796
ENSRNOG00000013248	-0.831073	7.16109	-5.70642	0.000431018	0.00305336	-0.22536	Wwc2	16	WW and C2 domain containing 2	ENSG00000151718	WWC2	1	80014	6.79886	7.52332
ENSRNOG00000061508	-2.36658	1.40147	-5.70409	0.000432189	0.00305987	0.471946	Reps2	X	RALBP1 associated Eps domain containing protein 2	ENSG00000169891	REPS2	1	9185	0.322654	2.48028
ENSRNOG00000005342	0.813426	4.22476	5.70046	0.000434017	0.00307102	-0.0353688	Rassf5	13	Ras association domain family member 5	ENSG00000266094	RASSF5	1	83593	4.65463	3.79489
ENSRNOG00000017981	1.71478	1.18641	5.69671	0.000435916	0.00307728	0.449927	Mcm10	17	minichromosome maintenance 10 replication initiation factor	ENSG00000065328	MCM10	1	55388	2.04856	0.324262
ENSRNOG00000060949	4.90123	0.406811	5.69753	0.000435503	0.00307728	0.431329	Anxa8	16	annexin A8	ENSG00000265190	ANXA8	1	653145	2.63847	-1.82485
ENSRNOG00000060949	4.90123	0.406811	5.69753	0.000435503	0.00307728	0.431329	Anxa8	16	annexin A8	ENSG00000265190	ANXA8	1	107984085	2.63847	-1.82485
ENSRNOG00000060949	4.90123	0.406811	5.69753	0.000435503	0.00307728	0.431329	Anxa8	16	annexin A8	ENSG00000264230	ANXA8L1	1	643650	2.63847	-1.82485
ENSRNOG00000060949	4.90123	0.406811	5.69753	0.000435503	0.00307728	0.431329	Anxa8	16	annexin A8	ENSG00000264230	ANXA8L1	1	728113	2.63847	-1.82485
ENSRNOG00000013950	-3.27114	0.877981	-5.69785	0.000435337	0.00307728	0.413679	Aadac	2	arylacetamide deacetylase	ENSG00000114771	AADAC	1	13	-0.778493	2.53445
ENSRNOG00000002879	0.71763	4.56899	5.697	0.000435773	0.00307728	-0.103664	Psen2	13	presenilin 2	ENSG00000143801	PSEN2	1	5664	4.89396	4.24403
ENSRNOG00000001599	-0.797998	4.56702	-5.69564	0.000436464	0.00307757	-0.0571252	Rwdd2b	11	RWD domain containing 2B	ENSG00000156253	RWDD2B	1	10069	4.20959	4.92444
ENSRNOG00000057628	-0.749191	6.43872	-5.69605	0.000436253	0.00307757	-0.262591	Slc5a6	6	solute carrier family 5 member 6	ENSG00000138074	SLC5A6	1	8884	6.06751	6.80993
ENSRNOG00000016451	1.41533	3.01587	5.69317	0.000437722	0.00308159	0.213437	Cd1d1	2	CD1d1 molecule	ENSG00000158473	CD1D	1	912	3.68479	2.34696
ENSRNOG00000014861	-1.16258	4.37352	-5.69353	0.000437538	0.00308159	0.000660281	Rnf183	5	ring finger protein 183	ENSG00000165188	RNF183	1	138065	3.81279	4.93424
ENSRNOG00000015385	-1.06907	8.07283	-5.69302	0.000437797	0.00308159	-0.181977	Pink1	5	PTEN induced putative kinase 1	ENSG00000158828	PINK1	1	65018	7.50033	8.64533
ENSRNOG00000018168	-0.665475	7.30925	-5.69034	0.000439164	0.00308942	-0.237087	Klc4	9	kinesin light chain 4	ENSG00000137171	KLC4	1	89953	6.96484	7.65365
ENSRNOG00000006418	0.975789	3.17904	5.68887	0.000439919	0.00309108	0.172205	Samhd1	3	SAM and HD domain containing deoxynucleoside triphosphate triphosphohydrolase 1	ENSG00000101347	SAMHD1	1	25939	3.69124	2.66684
ENSRNOG00000036866	0.701414	4.78712	5.68895	0.000439876	0.00309108	-0.147366	Acer3	1	alkaline ceramidase 3	ENSG00000078124	ACER3	1	55331	5.12276	4.45149
ENSRNOG00000019587	-1.34629	6.59387	-5.68839	0.000440163	0.00309108	-0.257429	Ptprn	9	protein tyrosine phosphatase, receptor type, N	ENSG00000054356	PTPRN	1	5798	5.89284	7.2949
ENSRNOG00000014202	2.52822	1.20138	5.6863	0.00044124	0.00309623	0.446816	Snx20	19	sorting nexin 20	ENSG00000167208	SNX20	1	124460	2.29826	0.104499
ENSRNOG00000021041	1.13471	4.19824	5.68598	0.000441407	0.00309623	-0.0521618	Fam171a2	10	family with sequence similarity 171, member A2	ENSG00000161682	FAM171A2	1	284069	4.77529	3.62119
ENSRNOG00000000303	0.862726	3.58029	5.68381	0.000442523	0.00310226	0.0742265	Cep57l1	20	centrosomal protein 57-like 1	ENSG00000183137	CEP57L1	1	285753	4.04577	3.11482
ENSRNOG00000019604	1.19119	3.89416	5.6805	0.000444237	0.00311248	0.00160854	Pld2	10	phospholipase D2	ENSG00000129219	PLD2	1	5338	4.50078	3.28753
ENSRNOG00000013069	2.36668	-0.363758	5.67886	0.000445088	0.0031157	0.389926	Sapcd2	3	suppressor APC domain containing 2	ENSG00000186193	SAPCD2	1	89958	0.884896	-1.61241
ENSRNOG00000057284	0.663822	6.51505	5.67862	0.00044521	0.0031157	-0.282319	Cenpb	3	centromere protein B	ENSG00000125817	CENPB	1	1059	6.80996	6.22014
ENSRNOG00000008332	0.75688	4.61146	5.67734	0.000445877	0.00311857	-0.132287	Smo	4	smoothened, frizzled class receptor	ENSG00000128602	SMO	1	6608	4.97494	4.24797
ENSRNOG00000026775	-0.715793	6.90539	-5.67642	0.000446358	0.00312014	-0.277238	Pmpca	3	peptidase, mitochondrial processing alpha subunit	ENSG00000165688	PMPCA	1	23203	6.55317	7.25762
ENSRNOG00000016343	2.86792	3.24645	5.67238	0.000448466	0.00313272	0.178366	Dkk3	1	dickkopf WNT signaling pathway inhibitor 3	ENSG00000050165	DKK3	1	27122	4.55451	1.93839
ENSRNOG00000008025	-1.03863	4.6575	-5.67149	0.000448934	0.00313272	-0.0851666	Bend5	5	BEN domain containing 5	ENSG00000162373	BEND5	1	79656	4.16101	5.154
ENSRNOG00000003049	-0.954418	7.67354	-5.67198	0.000448677	0.00313272	-0.238489	Hsd17b10	X	hydroxysteroid (17-beta) dehydrogenase 10	ENSG00000072506	HSD17B10	1	3028	7.1528	8.19428
ENSRNOG00000014426	2.71972	3.42741	5.6703	0.00044956	0.00313529	0.129943	Lox	18	lysyl oxidase	ENSG00000113083	LOX	1	4015	4.6469	2.20791
ENSRNOG00000016148	2.08587	0.491659	5.66786	0.000450845	0.00313897	0.431288	Gtse1	7	G-2 and S-phase expressed 1	ENSG00000075218	GTSE1	1	51512	1.53721	-0.553889
ENSRNOG00000017967	-1.1795	4.98929	-5.66747	0.000451047	0.00313897	-0.145205	Asb13	17	ankyrin repeat and SOCS box-containing 13	ENSG00000196372	ASB13	1	79754	4.48067	5.49792
ENSRNOG00000015029	-0.869323	6.35938	-5.66733	0.000451122	0.00313897	-0.295391	Dbt	2	dihydrolipoamide branched chain transacylase E2	ENSG00000137992	DBT	1	1629	5.95214	6.76662
ENSRNOG00000001717	-0.712922	6.22658	-5.66802	0.000450759	0.00313897	-0.295805	Opa1	11	OPA1, mitochondrial dynamin like GTPase	ENSG00000198836	OPA1	1	4976	5.91009	6.54307
ENSRNOG00000009588	2.51716	0.954518	5.6658	0.000451928	0.00314277	0.425327	Snph	3	syntaphilin	ENSG00000101298	SNPH	1	9751	2.22885	-0.319816
ENSRNOG00000034084	-2.0202	7.89943	-5.66496	0.000452373	0.00314407	-0.236662	Ggct	4	gamma-glutamyl cyclotransferase	ENSG00000006625	GGCT	1	79017	6.93551	8.86334
ENSRNOG00000034084	-2.0202	7.89943	-5.66496	0.000452373	0.00314407	-0.236662	Ggct	4	gamma-glutamyl cyclotransferase	ENSG00000281039	AC005154.5	0	NA	6.93551	8.86334
ENSRNOG00000012965	1.33684	2.52315	5.66221	0.000453831	0.003147	0.2493	Themis2	5	thymocyte selection associated family member 2	ENSG00000130775	THEMIS2	1	9473	3.1999	1.8464
ENSRNOG00000012040	-2.05837	3.62864	-5.66256	0.000453645	0.003147	0.194013	Slc25a48	17	solute carrier family 25, member 48	ENSG00000145832	SLC25A48	1	153328	2.63369	4.62359
ENSRNOG00000000610	-1.09677	8.05848	-5.66232	0.000453775	0.003147	-0.222151	Cisd1	20	CDGSH iron sulfur domain 1	ENSG00000122873	CISD1	1	55847	7.47576	8.6412
ENSRNOG00000013515	-0.971869	4.17689	-5.66076	0.000454599	0.00314872	-0.0116165	Ptpru	5	protein tyrosine phosphatase, receptor type, U	ENSG00000060656	PTPRU	1	10076	3.64483	4.70894
ENSRNOG00000060329	0.812847	5.91083	5.66081	0.000454575	0.00314872	-0.302046	Emb	2	embigin	ENSG00000170571	EMB	1	133418	6.26627	5.55539
ENSRNOG00000008178	1.08771	3.97694	5.65993	0.000455042	0.00314999	-0.0279845	Nxn	10	nucleoredoxin	ENSG00000167693	NXN	1	64359	4.43629	3.5176
ENSRNOG00000002659	1.48476	3.49284	5.6584	0.00045586	0.00315206	0.0783829	Ciita	10	class II, major histocompatibility complex, transactivator	ENSG00000179583	CIITA	1	4261	4.17169	2.81399
ENSRNOG00000016678	1.25043	5.01204	5.65846	0.000455824	0.00315206	-0.219231	Angptl2	3	angiopoietin-like 2	ENSG00000136859	ANGPTL2	1	23452	5.54891	4.47516
ENSRNOG00000016763	-0.827232	5.94032	-5.65688	0.000456672	0.00315587	-0.288228	Fgfr4	17	fibroblast growth factor receptor 4	ENSG00000160867	FGFR4	1	2264	5.54458	6.33605
ENSRNOG00000004405	0.800832	8.82663	5.6543	0.000458052	0.00316181	-0.149772	Pigr	13	polymeric immunoglobulin receptor	ENSG00000162896	PIGR	1	5284	9.1879	8.46536
ENSRNOG00000031475	2.59586	3.94888	5.65327	0.000458602	0.00316201	0.0140504	Col16a1	5	collagen type XVI alpha 1 chain	ENSG00000084636	COL16A1	1	1307	5.13806	2.7597
ENSRNOG00000016122	0.600959	5.7701	5.65363	0.000458412	0.00316201	-0.308291	Hmgcr	2	3-hydroxy-3-methylglutaryl-CoA reductase	ENSG00000113161	HMGCR	1	3156	6.0922	5.448
ENSRNOG00000016156	3.34747	3.57078	5.65181	0.00045939	0.00316564	0.149083	Nptxr	7	neuronal pentraxin receptor	ENSG00000221890	NPTXR	1	23467	5.0758	2.06575
ENSRNOG00000008471	1.807	1.5521	5.65065	0.000460012	0.00316813	0.374419	Kif21b	13	kinesin family member 21B	ENSG00000116852	KIF21B	1	23046	2.53377	0.570432
ENSRNOG00000015717	1.52419	1.78307	5.64547	0.000462813	0.00318417	0.341967	Ptpre	1	protein tyrosine phosphatase, receptor type, E	ENSG00000132334	PTPRE	1	5791	2.57608	0.990061
ENSRNOG00000043044	1.58403	3.94766	5.64537	0.000462866	0.00318417	-0.035343	Cnn2	7	calponin 2	ENSG00000064666	CNN2	1	1265	4.64157	3.25375
ENSRNOG00000028288	-1.44574	4.03812	-5.64398	0.000463624	0.00318758	0.0331806	Clrn3	1	clarin 3	ENSG00000180745	CLRN3	1	119467	3.29276	4.78347
ENSRNOG00000012215	-1.61357	4.74302	-5.6427	0.000464316	0.00319053	-0.108205	Baiap2l2	7	BAI1-associated protein 2-like 2	ENSG00000128298	BAIAP2L2	1	80115	4.00769	5.47834
ENSRNOG00000061739	2.34853	0.629553	5.64158	0.000464926	0.00319291	0.403012	Klrk1	4	killer cell lectin like receptor K1	ENSG00000213809	KLRK1	1	22914	1.84665	-0.587546
ENSRNOG00000061739	2.34853	0.629553	5.64158	0.000464926	0.00319291	0.403012	Klrk1	4	killer cell lectin like receptor K1	ENSG00000213809	KLRK1	1	100528032	1.84665	-0.587546
ENSRNOG00000022702	-0.805295	6.28291	-5.63983	0.000465882	0.00319767	-0.329477	Fbxo22	8	F-box protein 22	ENSG00000167196	FBXO22	1	26263	5.86072	6.70511
ENSRNOG00000027480	-1.02136	3.56124	-5.63829	0.000466723	0.00319859	0.0952532	Tmem116	12	transmembrane protein 116	ENSG00000198270	TMEM116	1	89894	3.09077	4.03171
ENSRNOG00000002097	0.847387	3.70673	5.63814	0.000466808	0.00319859	-0.0112794	Rasl11b	14	RAS-like family 11 member B	ENSG00000128045	RASL11B	1	65997	4.13053	3.28292
ENSRNOG00000009686	-1.21872	6.0739	-5.63847	0.000466626	0.00319859	-0.304302	Aqp7	5	aquaporin 7	ENSG00000165269	AQP7	1	364	5.43848	6.70933
ENSRNOG00000009686	-1.21872	6.0739	-5.63847	0.000466626	0.00319859	-0.304302	Aqp7	5	aquaporin 7	ENSG00000259916	AL845331.1	1	100509620	5.43848	6.70933
ENSRNOG00000007894	-1.0216	5.17365	-5.63568	0.000468155	0.00320602	-0.22861	Mpdz	5	multiple PDZ domain crumbs cell polarity complex component	ENSG00000107186	MPDZ	1	8777	4.73923	5.60808
ENSRNOG00000015941	2.35333	2.88979	5.63469	0.0004687	0.00320794	0.175271	Fkbp10	10	FK506 binding protein 10	ENSG00000141756	FKBP10	1	60681	3.96114	1.81844
ENSRNOG00000004089	-0.929181	3.45199	-5.63303	0.000469615	0.00321239	0.110767	Enpp2	7	ectonucleotide pyrophosphatase/phosphodiesterase 2	ENSG00000136960	ENPP2	1	5168	2.99006	3.91393
ENSRNOG00000047453	-0.967766	3.52323	-5.63252	0.000469892	0.00321247	0.0954592	Casd1	4	CAS1 domain containing 1	ENSG00000127995	CASD1	1	64921	3.07257	3.97389
ENSRNOG00000048980	1.75448	3.02333	5.62967	0.000471469	0.00322144	0.12533	Gng2	15	G protein subunit gamma 2	ENSG00000186469	GNG2	1	54331	3.86574	2.18091
ENSRNOG00000008353	-2.91726	2.30991	-5.62918	0.000471738	0.00322147	0.373125	Iqch	8	IQ motif containing H	ENSG00000103599	IQCH	1	64799	1.00377	3.61606
ENSRNOG00000007805	2.00744	0.649227	5.62856	0.000472082	0.003222	0.388409	Mybl2	3	myeloblastosis oncogene-like 2	ENSG00000101057	MYBL2	1	4605	1.63722	-0.338772
ENSRNOG00000003496	0.734363	5.16916	5.62768	0.000472573	0.00322354	-0.285425	Tbc1d9	19	TBC1 domain family member 9	ENSG00000109436	TBC1D9	1	23158	5.57854	4.75978
ENSRNOG00000012208	2.36092	2.16149	5.61992	0.000476898	0.00324811	0.271297	Itgb7	7	integrin subunit beta 7	ENSG00000139626	ITGB7	1	3695	3.29835	1.02463
ENSRNOG00000047053	0.682401	4.14029	5.61978	0.000476979	0.00324811	-0.116525	Thyn1	8	thymocyte nuclear protein 1	ENSG00000151500	THYN1	1	29087	4.47668	3.80391
ENSRNOG00000003125	-0.592956	7.0483	-5.62043	0.000476616	0.00324811	-0.341523	Rogdi	10	rogdi homolog	ENSG00000067836	ROGDI	1	79641	6.76073	7.33588
ENSRNOG00000009785	3.99853	-0.982538	5.61506	0.000479632	0.00326252	0.29135	Cdkn3	15	cyclin-dependent kinase inhibitor 3	ENSG00000100526	CDKN3	1	1033	0.967156	-2.93223
ENSRNOG00000003150	-1.00328	7.08291	-5.61524	0.000479529	0.00326252	-0.344957	Mpc2	13	mitochondrial pyruvate carrier 2	ENSG00000143158	MPC2	1	25874	6.54505	7.62078
ENSRNOG00000005347	-1.15549	5.1263	-5.61191	0.000481409	0.00327277	-0.229909	Fjx1	3	four jointed box 1	ENSG00000179431	FJX1	1	24147	4.56015	5.69246
ENSRNOG00000010825	0.904674	3.65311	5.60799	0.000483636	0.00328546	-0.0317305	Snapc3	5	small nuclear RNA activating complex, polypeptide 3	ENSG00000164975	SNAPC3	1	6619	4.06135	3.24487
ENSRNOG00000004972	1.54211	3.72542	5.60506	0.000485308	0.00329374	-0.0439591	Upp1	14	uridine phosphorylase 1	ENSG00000183696	UPP1	1	7378	4.38184	3.069
ENSRNOG00000037148	-1.09857	3.93004	-5.60403	0.000485894	0.00329587	-0.0311039	Adap2	10	ArfGAP with dual PH domains 2	ENSG00000184060	ADAP2	1	55803	3.36338	4.49669
ENSRNOG00000004498	0.960384	5.80959	5.60274	0.000486637	0.00329907	-0.370553	Scin	6	scinderin	ENSG00000006747	SCIN	1	85477	6.29038	5.32879
ENSRNOG00000009347	1.66721	2.69329	5.60203	0.000487043	0.00329998	0.147888	Arhgap25	4	Rho GTPase activating protein 25	ENSG00000163219	ARHGAP25	1	9938	3.50887	1.87771
ENSRNOG00000016827	-2.59436	6.97896	-5.60139	0.000487407	0.0033006	-0.32829	Slc38a3	8	solute carrier family 38, member 3	ENSG00000188338	SLC38A3	1	10991	5.74908	8.20883
ENSRNOG00000025936	0.783907	8.53179	5.59983	0.000488303	0.00330483	-0.243721	Rpl6	12	ribosomal protein L6	ENSG00000089009	RPL6	1	6128	8.87714	8.18644
ENSRNOG00000012508	-1.7112	5.17911	-5.59863	0.000488995	0.00330766	-0.226712	Slc39a8	2	solute carrier family 39 member 8	ENSG00000138821	SLC39A8	1	64116	4.37712	5.98111
ENSRNOG00000019174	1.65894	1.60461	5.59776	0.000489495	0.0033092	0.304748	Chtf18	10	chromosome transmission fidelity factor 18	ENSG00000127586	CHTF18	1	63922	2.40871	0.800521
ENSRNOG00000001177	-0.899466	6.11204	-5.59715	0.000489848	0.00330974	-0.374452	Acads	12	acyl-CoA dehydrogenase, C-2 to C-3 short chain	ENSG00000122971	ACADS	1	35	5.63621	6.58787
ENSRNOG00000051470	1.81465	0.955684	5.59592	0.000490558	0.0033127	0.346549	Card9	3	caspase recruitment domain family, member 9	ENSG00000187796	CARD9	1	64170	1.83714	0.0742237
ENSRNOG00000005243	-1.01757	3.78643	-5.59043	0.000493743	0.0033268	-0.0121153	Pop1	7	POP1 homolog, ribonuclease P/MRP subunit	ENSG00000104356	POP1	1	10940	3.32671	4.24615
ENSRNOG00000001992	-0.748299	8.45511	-5.59163	0.000493047	0.0033268	-0.278217	Atp6v1a	11	ATPase H+ transporting V1 subunit A	ENSG00000114573	ATP6V1A	1	523	8.09097	8.81926
ENSRNOG00000009005	-0.957107	5.52338	-5.59103	0.000493397	0.0033268	-0.329111	Slco2a1	8	solute carrier organic anion transporter family, member 2a1	ENSG00000174640	SLCO2A1	1	6578	5.06596	5.98079
ENSRNOG00000015528	-0.659348	7.00791	-5.59049	0.000493712	0.0033268	-0.380899	Pja2	9	praja ring finger ubiquitin ligase 2	ENSG00000198961	PJA2	1	9867	6.7097	7.30612
ENSRNOG00000003594	-1.04627	6.61834	-5.58598	0.00049634	0.00334245	-0.395513	Tmem183a	13	transmembrane protein 183A	ENSG00000163444	TMEM183A	1	92703	6.11096	7.12572
ENSRNOG00000003594	-1.04627	6.61834	-5.58598	0.00049634	0.00334245	-0.395513	Tmem183a	13	transmembrane protein 183A	ENSG00000163444	TMEM183A	1	653659	6.11096	7.12572
ENSRNOG00000030187	10.0032	1.54468	5.58209	0.000498627	0.00335412	0.32886	Mmp12	8	matrix metallopeptidase 12	ENSG00000262406	MMP12	1	4321	6.50729	-3.41794
ENSRNOG00000019305	-1.55426	5.75136	-5.58216	0.000498588	0.00335412	-0.336737	Sh3tc2	18	SH3 domain and tetratricopeptide repeats 2	ENSG00000169247	SH3TC2	1	79628	5.09569	6.40703
ENSRNOG00000013914	2.4142	0.447277	5.58103	0.000499251	0.0033546	0.332871	Gpr132	6	G protein-coupled receptor 132	ENSG00000183484	GPR132	1	29933	1.59549	-0.700941
ENSRNOG00000011241	-1.15519	4.42955	-5.58128	0.000499106	0.0033546	-0.156248	Tfdp2	8	transcription factor Dp-2	ENSG00000114126	TFDP2	1	7029	3.93359	4.92552
ENSRNOG00000017918	0.953827	2.93733	5.58025	0.000499708	0.00335581	0.0841161	Iglon5	1	IgLON family member 5	ENSG00000142549	IGLON5	1	402665	3.42587	2.44878
ENSRNOG00000014461	1.01268	3.15545	5.57932	0.000500258	0.00335654	0.0491778	Galns	19	galactosamine (N-acetyl)-6-sulfatase	ENSG00000141012	GALNS	1	2588	3.62421	2.68668
ENSRNOG00000011189	-2.4183	9.39543	-5.57913	0.00050037	0.00335654	-0.231446	Acy1	8	aminoacylase 1	ENSG00000114786	ABHD14A-ACY1	1	100526760	8.20996	10.5809
ENSRNOG00000011189	-2.4183	9.39543	-5.57913	0.00050037	0.00335654	-0.231446	Acy1	8	aminoacylase 1	ENSG00000243989	ACY1	1	95	8.20996	10.5809
ENSRNOG00000015131	2.04046	0.435413	5.57588	0.000502296	0.0033568	0.32935	Ube2c	3	ubiquitin-conjugating enzyme E2C	ENSG00000175063	UBE2C	1	11065	1.50269	-0.631868
ENSRNOG00000024000	2.93786	0.927894	5.5758	0.000502344	0.0033568	0.328679	Cd22	1	CD22 molecule	ENSG00000012124	CD22	1	933	2.26569	-0.409905
ENSRNOG00000000563	2.24397	1.08319	5.57711	0.000501568	0.0033568	0.315787	Adamts14	20	ADAM metallopeptidase with thrombospondin type 1 motif, 14	ENSG00000138316	ADAMTS14	1	140766	2.27039	-0.104007
ENSRNOG00000053430	1.89086	3.51276	5.57608	0.000502175	0.0033568	-0.0234824	Slco4a1	3	solute carrier organic anion transporter family, member 4a1	ENSG00000101187	SLCO4A1	1	28231	4.49371	2.53181
ENSRNOG00000007923	-1.30856	4.28275	-5.57796	0.000501065	0.0033568	-0.110779	Cgref1	6	cell growth regulator with EF hand domain 1	ENSG00000138028	CGREF1	1	10669	3.61552	4.94997
ENSRNOG00000000185	-1.00903	6.30391	-5.5765	0.000501927	0.0033568	-0.405393	Mpst	7	mercaptopyruvate sulfurtransferase	ENSG00000128309	MPST	1	4357	5.74914	6.85868
ENSRNOG00000004479	1.21196	2.04182	5.57157	0.00050486	0.00336718	0.22771	Aurka	3	aurora kinase A	ENSG00000087586	AURKA	1	6790	2.63769	1.44594
ENSRNOG00000013152	-0.700086	4.7133	-5.57147	0.00050492	0.00336718	-0.246471	Arhgap10	19	Rho GTPase activating protein 10	ENSG00000071205	ARHGAP10	1	79658	4.36918	5.05741
ENSRNOG00000052990	0.760813	5.08116	5.57162	0.000504833	0.00336718	-0.343918	Cers5	7	ceramide synthase 5	ENSG00000139624	CERS5	1	91012	5.42951	4.73281
ENSRNOG00000003840	-1.08125	6.07689	-5.57132	0.000505008	0.00336718	-0.39794	Slit2	14	slit guidance ligand 2	ENSG00000145147	SLIT2	1	9353	5.59618	6.5576
ENSRNOG00000013526	3.08176	3.29611	5.57057	0.000505457	0.00336832	0.0775023	Rassf4	4	Ras association domain family member 4	ENSG00000107551	RASSF4	1	83937	4.57674	2.01547
ENSRNOG00000054360	2.50565	-0.264591	5.56966	0.000505998	0.00337008	0.275182	Tspan11	4	tetraspanin 11	ENSG00000110900	TSPAN11	1	441631	0.956632	-1.48581
ENSRNOG00000046307	-1.56521	7.22822	-5.56248	0.000510315	0.00339697	-0.402348	Glyctk	8	glycerate kinase	ENSG00000168237	GLYCTK	1	132158	6.44787	8.00857
ENSRNOG00000009884	2.01603	5.30225	5.56028	0.000511646	0.00340396	-0.355067	Lgals1	7	galectin 1	ENSG00000100097	LGALS1	1	3956	6.17518	4.42932
ENSRNOG00000023881	1.34824	2.76613	5.55889	0.000512488	0.00340398	0.0815703	Skap1	10	src kinase associated phosphoprotein 1	ENSG00000141293	SKAP1	1	8631	3.43358	2.09868
ENSRNOG00000009421	-1.07781	7.36164	-5.55931	0.000512235	0.00340398	-0.401367	Ivd	3	isovaleryl-CoA dehydrogenase	ENSG00000128928	IVD	1	3712	6.82821	7.89507
ENSRNOG00000003815	-0.86299	7.1877	-5.55888	0.00051249	0.00340398	-0.412648	Slc25a11	10	solute carrier family 25 member 11	ENSG00000108528	SLC25A11	1	8402	6.73769	7.63772
ENSRNOG00000011475	-1.75916	3.91481	-5.55513	0.000514773	0.00341642	-0.0299769	Srcin1	10	SRC kinase signaling inhibitor 1	ENSG00000277363	SRCIN1	1	80725	3.16238	4.66724
ENSRNOG00000045743	-3.34448	6.68618	-5.55488	0.000514926	0.00341642	-0.329887	Etnppl	2	ethanolamine-phosphate phospho-lyase	ENSG00000164089	ETNPPL	1	64850	5.15341	8.21895
ENSRNOG00000027037	2.14121	1.11883	5.55339	0.000515832	0.00342056	0.295113	Alox12	10	arachidonate 12-lipoxygenase, 12S type	ENSG00000108839	ALOX12	1	239	2.17541	0.0622462
ENSRNOG00000001187	1.27758	2.24318	5.55135	0.000517081	0.00342697	0.174406	Oasl	12	2'-5'-oligoadenylate synthetase-like	ENSG00000135114	OASL	1	8638	2.84395	1.64241
ENSRNOG00000008000	1.96451	2.43876	5.54972	0.000518081	0.00343172	0.140676	Syt13	3	synaptotagmin 13	ENSG00000019505	SYT13	1	57586	3.29896	1.57856
ENSRNOG00000005370	2.61017	0.137963	5.54619	0.00052025	0.00344414	0.289652	S1pr4	7	sphingosine-1-phosphate receptor 4	ENSG00000125910	S1PR4	1	8698	1.52744	-1.25151
ENSRNOG00000003365	1.87442	2.41253	5.54575	0.000520524	0.00344414	0.142535	Cadm3	13	cell adhesion molecule 3	ENSG00000162706	CADM3	1	57863	3.20926	1.6158
ENSRNOG00000001924	4.37641	-0.50339	5.54327	0.000522054	0.00345238	0.245074	Tp63	11	tumor protein p63	ENSG00000073282	TP63	1	8626	1.61772	-2.6245
ENSRNOG00000033192	1.76803	3.46371	5.54043	0.000523817	0.00346216	-0.0771804	Osmr	2	oncostatin M receptor	ENSG00000145623	OSMR	1	9180	4.30727	2.62016
ENSRNOG00000003794	-1.14369	4.28996	-5.53678	0.000526089	0.00347344	-0.170288	Nmral1	10	NmrA like redox sensor 1	ENSG00000153406	NMRAL1	1	57407	3.74574	4.83418
ENSRNOG00000011535	-1.0154	7.66135	-5.53577	0.000526718	0.00347565	-0.4118	Gcsh	19	glycine cleavage system protein H	ENSG00000284512	AC092718.8	1	NA	7.12222	8.20048
ENSRNOG00000011535	-1.0154	7.66135	-5.53577	0.000526718	0.00347565	-0.4118	Gcsh	19	glycine cleavage system protein H	ENSG00000140905	GCSH	1	2653	7.12222	8.20048
ENSRNOG00000011535	-1.0154	7.66135	-5.53577	0.000526718	0.00347565	-0.4118	Gcsh	19	glycine cleavage system protein H	ENSG00000260643	AC092718.3	1	NA	7.12222	8.20048
ENSRNOG00000013593	5.40828	0.935406	5.53509	0.000527147	0.00347659	0.26869	Upk3a	7	uroplakin 3A	ENSG00000100373	UPK3A	1	7380	3.3075	-1.43668
ENSRNOG00000009538	-1.22507	6.78439	-5.5342	0.000527701	0.00347836	-0.45564	Etfdh	2	electron transfer flavoprotein dehydrogenase	ENSG00000171503	ETFDH	1	2110	6.20869	7.36009
ENSRNOG00000009153	-1.55464	5.07123	-5.53214	0.000528993	0.00348309	-0.298057	Cidec	4	cell death-inducing DFFA-like effector c	ENSG00000187288	CIDEC	1	63924	4.36709	5.77536
ENSRNOG00000048738	-0.910475	6.93633	-5.53139	0.000529463	0.00348429	-0.459925	LOC108348065	X	histone deacetylase 6	ENSG00000094631	HDAC6	1	10013	6.49516	7.37751
ENSRNOG00000047307	-1.82671	1.08766	-5.52799	0.000531605	0.00348809	0.276251	Cntfr	5	ciliary neurotrophic factor receptor	ENSG00000122756	CNTFR	1	1271	0.129954	2.04536
ENSRNOG00000009339	2.02157	0.85379	5.52774	0.000531765	0.00348809	0.269592	Cenpe	2	centromere protein E	ENSG00000138778	CENPE	1	1062	1.98428	-0.276704
ENSRNOG00000020684	0.898591	8.2834	5.52828	0.000531426	0.00348809	-0.352853	Vat1	10	vesicle amine transport 1	ENSG00000108828	VAT1	1	10493	8.6688	7.898
ENSRNOG00000014866	-1.38634	5.32769	-5.52938	0.000530734	0.00348809	-0.361803	Pign	13	phosphatidylinositol glycan anchor biosynthesis, class N	ENSG00000197563	PIGN	1	23556	4.73153	5.92385
ENSRNOG00000039862	-0.606568	5.32679	-5.5295	0.000530655	0.00348809	-0.400639	Cldn12	4	claudin 12	ENSG00000157224	CLDN12	1	9069	5.04688	5.60669
ENSRNOG00000007895	-0.794382	7.58608	-5.52787	0.000531683	0.00348809	-0.425026	Pdhb	15	pyruvate dehydrogenase (lipoamide) beta	ENSG00000168291	PDHB	1	5162	7.19843	7.97374
ENSRNOG00000007047	-0.804454	7.34469	-5.52321	0.000534632	0.003505	-0.448387	Eps8	4	epidermal growth factor receptor pathway substrate 8	ENSG00000151491	EPS8	1	2059	6.94514	7.74424
ENSRNOG00000057760	4.051	-0.914279	5.52059	0.000536303	0.00351141	0.204674	Stil	5	Scl/Tal1 interrupting locus	ENSG00000123473	STIL	1	6491	0.933171	-2.76173
ENSRNOG00000021096	-0.948831	3.20694	-5.52031	0.000536477	0.00351141	0.0161097	Tmem143	1	transmembrane protein 143	ENSG00000161558	TMEM143	1	55260	2.71093	3.70294
ENSRNOG00000003992	1.68784	1.73926	5.51911	0.000537247	0.00351455	0.191296	Pik3r6	10	phosphoinositide-3-kinase, regulatory subunit 6	ENSG00000276231	PIK3R6	1	146850	2.60994	0.868574
ENSRNOG00000011917	3.44395	0.670303	5.51789	0.000538028	0.00351578	0.264222	Cd79b	10	CD79b molecule	ENSG00000007312	CD79B	1	974	2.57014	-1.22953
ENSRNOG00000003457	1.07096	2.81069	5.51673	0.000538765	0.00351578	0.0277569	Bicdl2	10	BICD family like cargo adaptor 2	ENSG00000162069	BICDL2	1	146439	3.36869	2.25269
ENSRNOG00000008639	0.705578	8.95923	5.51655	0.000538884	0.00351578	-0.315199	Pabpc1	7	poly(A) binding protein, cytoplasmic 1	ENSG00000070756	PABPC1	1	26986	9.28924	8.62923
ENSRNOG00000000913	0.903334	4.605	5.51793	0.000538002	0.00351578	-0.340643	Gusb	12	glucuronidase, beta	ENSG00000169919	GUSB	1	2990	5.0102	4.19979
ENSRNOG00000000800	-0.648585	5.72457	-5.5171	0.000538529	0.00351578	-0.460816	Man1a1	20	mannosidase, alpha, class 1A, member 1	ENSG00000111885	MAN1A1	1	4121	5.36363	6.08552
ENSRNOG00000036934	0.637756	5.41749	5.51527	0.000539704	0.00351924	-0.455037	Abhd12	3	abhydrolase domain containing 12	ENSG00000100997	ABHD12	1	26090	5.70526	5.12972
ENSRNOG00000004222	-2.57318	0.19094	-5.5144	0.000540261	0.00352098	0.199312	S100g	X	S100 calcium binding protein G	ENSG00000169906	S100G	1	795	-1.12424	1.50612
ENSRNOG00000017808	-1.54308	5.5037	-5.51117	0.000542341	0.00353264	-0.402255	Klf15	4	Kruppel-like factor 15	ENSG00000163884	KLF15	1	28999	4.7436	6.2638
ENSRNOG00000007410	-2.00023	1.15288	-5.51018	0.000542984	0.00353493	0.256566	Dab1	5	DAB1, reelin adaptor protein	ENSG00000173406	DAB1	1	1600	0.211271	2.09449
ENSRNOG00000015810	2.55131	0.154854	5.5087	0.00054394	0.00353736	0.244584	Trip13	1	thyroid hormone receptor interactor 13	ENSG00000071539	TRIP13	1	9319	1.44229	-1.13258
ENSRNOG00000010085	-0.605869	7.12745	-5.50891	0.000543805	0.00353736	-0.47885	Cldn10	15	claudin 10	ENSG00000134873	CLDN10	1	9071	6.80749	7.44742
ENSRNOG00000058337	3.42482	0.432097	5.50586	0.000545778	0.00354454	0.243227	Plcb2	3	phospholipase C, beta 2	ENSG00000137841	PLCB2	1	5330	1.98299	-1.11879
ENSRNOG00000057096	-0.902062	4.32439	-5.50609	0.000545632	0.00354454	-0.235444	Gnai1	4	G protein subunit alpha i1	ENSG00000127955	GNAI1	1	2770	3.90653	4.74225
ENSRNOG00000004857	-0.723297	4.94807	-5.50565	0.000545921	0.00354454	-0.372783	L2hgdh	6	L-2-hydroxyglutarate dehydrogenase	ENSG00000087299	L2HGDH	1	79944	4.59302	5.30312
ENSRNOG00000000170	-0.682038	5.52654	-5.50257	0.000547924	0.00355564	-0.45534	Slc30a4	3	solute carrier family 30 member 4	ENSG00000104154	SLC30A4	1	7782	5.19146	5.86162
ENSRNOG00000019041	0.642287	7.60184	5.50164	0.000548534	0.0035577	-0.442526	Psme1	15	proteasome activator subunit 1	ENSG00000092010	PSME1	1	5720	7.88969	7.31398
ENSRNOG00000019319	-0.883435	5.18692	-5.50004	0.000549578	0.00356257	-0.40571	Fchsd2	1	FCH and double SH3 domains 2	ENSG00000137478	FCHSD2	1	9873	4.78616	5.58768
ENSRNOG00000006589	-1.02147	6.52834	-5.49897	0.00055028	0.00356521	-0.507442	LOC103694877	20	macrophage migration inhibitory factor	ENSG00000240972	MIF	1	4282	6.00154	7.05514
ENSRNOG00000036728	4.03522	-0.35588	5.49747	0.000551261	0.00356967	0.204904	Cd300lb	10	CD300 molecule-like family member b	ENSG00000178789	CD300LB	1	124599	1.51881	-2.23057
ENSRNOG00000058566	5.43935	-0.443381	5.49516	0.000552779	0.00357608	0.204449	LOC103694381	20	lymphotoxin-beta	ENSG00000227507	LTB	1	4050	1.77319	-2.65996
ENSRNOG00000032626	3.77056	-1.1247	5.49507	0.000552841	0.00357608	0.169113	Mmp3	8	matrix metallopeptidase 3	ENSG00000149968	MMP3	1	4314	0.912263	-3.16167
ENSRNOG00000030628	0.655895	7.83198	5.49352	0.000553864	0.00358079	-0.435521	Eif4a1	10	eukaryotic translation initiation factor 4A1	ENSG00000161960	EIF4A1	1	1973	8.12481	7.53915
ENSRNOG00000030633	0.754155	5.78993	5.49266	0.000554434	0.00358256	-0.511915	Lmf2	7	lipase maturation factor 2	ENSG00000100258	LMF2	1	91289	6.11327	5.46659
ENSRNOG00000008103	-0.958449	9.42903	-5.49174	0.000555042	0.00358458	-0.328919	Mdh1	14	malate dehydrogenase 1	ENSG00000014641	MDH1	1	4190	8.91225	9.94581
ENSRNOG00000000815	0.984185	5.82548	5.49088	0.000555613	0.00358636	-0.513231	Smpdl3a	20	sphingomyelin phosphodiesterase, acid-like 3A	ENSG00000172594	SMPDL3A	1	10924	6.26473	5.38623
ENSRNOG00000045926	0.683166	5.09663	5.48641	0.000558578	0.00360359	-0.456067	Lrrc45	10	leucine rich repeat containing 45	ENSG00000169683	LRRC45	1	201255	5.46007	4.73319
ENSRNOG00000040287	3.02386	1.95434	5.48513	0.000559434	0.00360678	0.137405	Cyp1b1	6	cytochrome P450, family 1, subfamily b, polypeptide 1	ENSG00000138061	CYP1B1	1	1545	3.41203	0.496646
ENSRNOG00000008165	1.8732	2.11615	5.48478	0.000559667	0.00360678	0.102399	Tpx2	3	TPX2, microtubule nucleation factor	ENSG00000088325	TPX2	1	22974	3.09354	1.13876
ENSRNOG00000008364	-2.08705	9.04417	-5.4842	0.000560057	0.00360737	-0.377907	Cat	3	catalase	ENSG00000121691	CAT	1	847	8.03825	10.0501
ENSRNOG00000037957	-2.16933	1.70816	-5.48327	0.000560677	0.00360945	0.218909	Aifm3	11	apoptosis inducing factor, mitochondria associated 3	ENSG00000183773	AIFM3	1	150209	0.753248	2.66308
ENSRNOG00000015093	1.18379	5.77336	5.48125	0.000562033	0.0036154	-0.515657	Sparcl1	14	SPARC like 1	ENSG00000152583	SPARCL1	1	8404	6.28832	5.2584
ENSRNOG00000016109	-0.671116	6.64969	-5.481	0.000562197	0.0036154	-0.535657	Neurl4	10	neuralized E3 ubiquitin protein ligase 4	ENSG00000261915	AC026954.2	0	NA	6.33842	6.96096
ENSRNOG00000016109	-0.671116	6.64969	-5.481	0.000562197	0.0036154	-0.535657	Neurl4	10	neuralized E3 ubiquitin protein ligase 4	ENSG00000215041	NEURL4	1	84461	6.33842	6.96096
ENSRNOG00000000442	0.768158	4.35361	5.47862	0.0005638	0.00362379	-0.341735	Notch4	20	notch 4	ENSG00000204301	NOTCH4	1	4855	4.70197	4.00525
ENSRNOG00000002906	-1.59988	3.14309	-5.47751	0.000564544	0.00362665	0.013413	Nr1i2	11	nuclear receptor subfamily 1, group I, member 2	ENSG00000144852	NR1I2	1	8856	2.45164	3.83455
ENSRNOG00000018848	-0.818964	5.38213	-5.47525	0.000566074	0.00363455	-0.462949	Eif1b	8	eukaryotic translation initiation factor 1B	ENSG00000114784	EIF1B	1	10289	5.00071	5.76355
ENSRNOG00000001297	0.712954	4.58809	5.47399	0.000566927	0.0036365	-0.39561	Prmt2	20	protein arginine methyltransferase 2	ENSG00000160310	PRMT2	1	3275	4.94853	4.22764
ENSRNOG00000061215	-1.74717	7.45629	-5.47391	0.000566977	0.0036365	-0.502514	Crym	1	crystallin, mu	ENSG00000103316	CRYM	1	1428	6.59006	8.32253
ENSRNOG00000021097	-0.874668	7.79917	-5.47345	0.00056729	0.00363659	-0.481779	Hpn	1	hepsin	ENSG00000105707	HPN	1	3249	7.34487	8.25347
ENSRNOG00000006839	-0.743152	5.49448	-5.47163	0.000568529	0.00364069	-0.493239	Arl5a	3	ADP-ribosylation factor like GTPase 5A	ENSG00000162980	ARL5A	1	26225	5.08902	5.89995
ENSRNOG00000018145	-0.837636	7.16306	-5.47093	0.000569	0.00364178	-0.526546	Crat	3	carnitine O-acetyltransferase	ENSG00000095321	CRAT	1	1384	6.70983	7.61629
[truncated: 2,174 more rows]

## Sheet: Study2_transcript_kidney_limma
ensgene	logFC	AveExpr	t	P.Value	adj.P.Val	B	symbol	chr	description	ensgene_human	symbol_human	Ortho_Conf	entrez
ENSRNOG00000016460	4.35734	8.73185	61.0377	1.41e-15	1.87e-11	24.9802	Clu	15	clusterin	ENSG00000120885	CLU	1	1191
ENSRNOG00000013973	5.57505	4.53978	36.6231	4.36e-13	2.9e-09	19.6173	Lcn2	3	lipocalin 2	ENSG00000148346	LCN2	1	3934
ENSRNOG00000043451	4.91797	10.9397	33.9631	1.01e-12	4.5e-09	19.5212	Spp1	14	secreted phosphoprotein 1	ENSG00000118785	SPP1	1	6696
ENSRNOG00000042499	2.92278	6.69	28.231	7.98e-12	2.65e-08	17.7647	LOC100364435	4	thymosin, beta 10-like	ENSG00000034510	TMSB10	1	9168
ENSRNOG00000008323	2.87391	5.80727	27.396	1.12e-11	2.65e-08	17.4298	Pitpnm3	10	PITPNM family member 3	ENSG00000091622	PITPNM3	1	83394
ENSRNOG00000017511	2.77283	7.11372	27.2286	1.19e-11	2.65e-08	17.3725	Dcdc2	17	doublecortin domain containing 2	ENSG00000146038	DCDC2	1	51473
ENSRNOG00000023334	1.69493	7.3044	26.5918	1.55e-11	2.96e-08	17.1138	Parp14	11	poly (ADP-ribose) polymerase family, member 14	ENSG00000173193	PARP14	1	54625
ENSRNOG00000000456	1.97869	4.58796	25.8168	2.16e-11	3.59e-08	16.7528	Psmb8	20	proteasome subunit beta 8	ENSG00000204264	PSMB8	1	5696
ENSRNOG00000014714	5.92027	2.15533	25.3965	2.59e-11	3.83e-08	14.8103	Trpv6	4	transient receptor potential cation channel, subfamily V, member 6	ENSG00000165125	TRPV6	1	55503
ENSRNOG00000017469	1.90509	7.29957	24.3913	4.05e-11	5.4e-08	16.1551	Anxa1	1	annexin A1	ENSG00000135046	ANXA1	1	301
ENSRNOG00000002930	1.80599	7.42135	23.9531	4.96e-11	6e-08	15.9529	Ppl	10	periplakin	ENSG00000118898	PPL	1	5493
ENSRNOG00000000443	3.22178	9.79942	23.7583	5.43e-11	6.02e-08	15.8629	C4a	20	complement component 4A (Rodgers blood group)	ENSG00000224389	C4B	1	721
ENSRNOG00000000443	3.22178	9.79942	23.7583	5.43e-11	6.02e-08	15.8629	C4a	20	complement component 4A (Rodgers blood group)	ENSG00000244731	C4A	1	720
ENSRNOG00000000443	3.22178	9.79942	23.7583	5.43e-11	6.02e-08	15.8629	C4a	20	complement component 4A (Rodgers blood group)	ENSG00000244731	C4A	1	110384692
ENSRNOG00000005731	3.62183	4.87118	23.2376	6.94e-11	6.47e-08	15.6054	Birc3	8	baculoviral IAP repeat-containing 3	ENSG00000023445	BIRC3	1	330
ENSRNOG00000028624	2.12938	6.30768	23.3356	6.62e-11	6.47e-08	15.6614	Kif26b	13	kinesin family member 26B	ENSG00000162849	KIF26B	1	55083
ENSRNOG00000010105	1.68411	4.7618	23.1337	7.29e-11	6.47e-08	15.5717	S100a11	2	S100 calcium binding protein A11	ENSG00000163191	S100A11	1	6282
ENSRNOG00000053075	5.34556	3.36256	22.9659	7.9e-11	6.58e-08	15.0194	B4galnt4	1	beta-1,4-N-acetyl-galactosaminyl transferase 4	ENSG00000182272	B4GALNT4	1	338707
ENSRNOG00000014367	4.6738	4.18546	22.5615	9.62e-11	7.11e-08	15.1658	Ephb6	4	Eph receptor B6	ENSG00000106123	EPHB6	1	2051
ENSRNOG00000008144	1.71613	5.51807	22.6395	9.26e-11	7.11e-08	15.3288	Irf1	10	interferon regulatory factor 1	ENSG00000125347	IRF1	1	3659
ENSRNOG00000012094	4.17693	6.3299	22.2468	1.12e-10	7.87e-08	15.1419	Ltbp2	6	latent transforming growth factor beta binding protein 2	ENSG00000119681	LTBP2	1	4053
ENSRNOG00000021611	1.57713	7.16552	22.1188	1.2e-10	7.97e-08	15.0569	Clip2	12	CAP-GLY domain containing linker protein 2	ENSG00000106665	CLIP2	1	7461
ENSRNOG00000001607	3.45311	8.19875	21.7781	1.42e-10	8.78e-08	14.8975	Adamts1	11	ADAM metallopeptidase with thrombospondin type 1 motif, 1	ENSG00000154734	ADAMTS1	1	9510
ENSRNOG00000031163	3.41041	5.30081	21.5667	1.58e-10	8.78e-08	14.8007	Nfkbiz	11	NFKB inhibitor zeta	ENSG00000144802	NFKBIZ	1	64332
ENSRNOG00000005580	2.85851	6.80699	21.625	1.54e-10	8.78e-08	14.8104	Itgb4	10	integrin subunit beta 4	ENSG00000132470	ITGB4	1	3691
ENSRNOG00000012543	2.46539	2.95081	21.6672	1.5e-10	8.78e-08	14.6497	Mcm3	9	minichromosome maintenance complex component 3	ENSG00000112118	MCM3	1	4172
ENSRNOG00000032922	2.66265	4.78385	21.2903	1.82e-10	9.67e-08	14.6593	Dclk1	2	doublecortin-like kinase 1	ENSG00000133083	DCLK1	1	9201
ENSRNOG00000017496	1.45866	4.85138	21.2252	1.89e-10	9.67e-08	14.6205	Cnp	10	2',3'-cyclic nucleotide 3' phosphodiesterase	ENSG00000173786	CNP	1	1267
ENSRNOG00000014218	-1.49396	4.2364	-20.7936	2.37e-10	1.17e-07	14.3987	Tmem25	8	transmembrane protein 25	ENSG00000149582	TMEM25	1	84866
ENSRNOG00000021256	5.90901	4.51797	20.6096	2.61e-10	1.21e-07	14.1978	Adra1d	3	adrenoceptor alpha 1D	ENSG00000171873	ADRA1D	1	146
ENSRNOG00000005935	2.48581	5.77151	20.5873	2.64e-10	1.21e-07	14.2665	A3galt2	5	alpha 1,3-galactosyltransferase 2	ENSG00000184389	A3GALT2	1	127550
ENSRNOG00000001514	3.61792	1.72817	20.3417	3.01e-10	1.26e-07	13.3908	Cdca7	3	cell division cycle associated 7	ENSG00000144354	CDCA7	1	83879
ENSRNOG00000029662	2.9014	5.25584	20.4584	2.83e-10	1.26e-07	14.2123	Wdfy4	16	WDFY family member 4	ENSG00000128815	WDFY4	1	57705
ENSRNOG00000015027	2.557	2.60515	20.3409	3.02e-10	1.26e-07	13.9291	Il18r1	9	interleukin 18 receptor 1	ENSG00000115604	IL18R1	1	8809
ENSRNOG00000013520	-2.34334	8.54806	-20.1779	3.3e-10	1.33e-07	14.0478	Mat2a	4	methionine adenosyltransferase 2A	ENSG00000168906	MAT2A	1	4144
ENSRNOG00000015655	1.51889	7.14622	19.9922	3.65e-10	1.43e-07	13.9135	Ptgfrn	2	prostaglandin F2 receptor inhibitor	ENSG00000134247	PTGFRN	1	5738
ENSRNOG00000010694	2.88923	3.85713	19.754	4.16e-10	1.56e-07	13.8183	Tpbg	8	trophoblast glycoprotein	ENSG00000146242	TPBG	1	7162
ENSRNOG00000001476	1.63561	6.06068	19.6814	4.33e-10	1.56e-07	13.743	Cldn4	12	claudin 4	ENSG00000189143	CLDN4	1	1364
ENSRNOG00000017777	-2.36048	6.89365	-19.7059	4.28e-10	1.56e-07	13.7657	Ahcy	3	adenosylhomocysteinase	ENSG00000101444	AHCY	1	191
ENSRNOG00000019627	2.98407	5.33581	19.452	4.93e-10	1.73e-07	13.6448	Mybpc2	1	myosin binding protein C, fast-type	ENSG00000086967	MYBPC2	1	4606
ENSRNOG00000003291	-1.44707	5.26034	-19.4004	5.08e-10	1.73e-07	13.6093	Creg1	13	cellular repressor of E1A-stimulated genes 1	ENSG00000143162	CREG1	1	8804
ENSRNOG00000013220	1.98354	6.25481	19.3348	5.27e-10	1.75e-07	13.54	Arhgap45	7	Rho GTPase activating protein 45	ENSG00000180448	ARHGAP45	1	23526
ENSRNOG00000004500	2.94888	4.98315	19.1849	5.74e-10	1.86e-07	13.5075	Myc	7	myelocytomatosis oncogene	ENSG00000136997	MYC	1	4609
ENSRNOG00000020470	1.9359	3.89683	19.0595	6.17e-10	1.91e-07	13.4435	Slc25a24	2	solute carrier family 25 member 24	ENSG00000085491	SLC25A24	1	29957
ENSRNOG00000023463	1.52178	5.53353	19.092	6.05e-10	1.91e-07	13.4109	Parp9	11	poly (ADP-ribose) polymerase family, member 9	ENSG00000138496	PARP9	1	83666
ENSRNOG00000000805	2.73116	5.76868	19.0128	6.33e-10	1.92e-07	13.3758	Gja1	20	gap junction protein, alpha 1	ENSG00000152661	GJA1	1	2697
ENSRNOG00000016099	-3.39432	4.48489	-18.9383	6.61e-10	1.96e-07	13.3752	Id4	17	inhibitor of DNA binding 4, HLH protein	ENSG00000172201	ID4	1	3400
ENSRNOG00000018841	3.5695	-0.179893	18.8505	6.96e-10	2.01e-07	11.5229	Sox8	10	SRY box 8	ENSG00000005513	SOX8	1	30812
ENSRNOG00000027552	1.54652	4.81341	18.7981	7.17e-10	2.02e-07	13.266	Tapbpl	4	TAP binding protein-like	ENSG00000139192	TAPBPL	1	55080
ENSRNOG00000018266	-3.36816	4.62735	-18.7737	7.28e-10	2.02e-07	13.2822	Slc23a3	9	solute carrier family 23, member 3	ENSG00000213901	SLC23A3	1	151295
ENSRNOG00000047367	3.10788	4.57342	18.681	7.68e-10	2.09e-07	13.2239	Card14	10	caspase recruitment domain family, member 14	ENSG00000141527	CARD14	1	79092
ENSRNOG00000026762	2.8531	2.92368	18.596	8.08e-10	2.09e-07	13.0994	RT1-DOa	20	RT1 class II, locus DOa	ENSG00000204252	HLA-DOA	1	3111
ENSRNOG00000013663	-2.14233	4.10739	-18.6085	8.02e-10	2.09e-07	13.1854	Tmem86a	1	transmembrane protein 86A	ENSG00000151117	TMEM86A	1	144110
ENSRNOG00000011936	-2.54085	4.79669	-18.576	8.17e-10	2.09e-07	13.1575	Abhd14a	8	abhydrolase domain containing 14A	ENSG00000248487	ABHD14A	1	25864
ENSRNOG00000039754	3.70198	1.59015	18.5343	8.38e-10	2.1e-07	12.5078	Rab7b	13	Rab7b, member RAS oncogene family	ENSG00000276600	RAB7B	1	338382
ENSRNOG00000018752	2.97798	4.64099	18.4741	8.68e-10	2.14e-07	13.0987	Clcf1	1	cardiotrophin-like cytokine factor 1	ENSG00000175505	CLCF1	1	23529
ENSRNOG00000016525	-3.34975	4.78364	-18.4002	9.07e-10	2.2e-07	13.0624	Susd3	17	sushi domain containing 3	ENSG00000157303	SUSD3	1	203328
ENSRNOG00000012835	3.9655	1.51106	18.304	9.6e-10	2.24e-07	12.3579	Espl1	7	extra spindle pole bodies like 1, separase	ENSG00000135476	ESPL1	1	9700
ENSRNOG00000012208	2.92058	2.12937	18.3238	9.49e-10	2.24e-07	12.7786	Itgb7	7	integrin subunit beta 7	ENSG00000139626	ITGB7	1	3695
ENSRNOG00000054274	2.40244	4.44346	18.2595	9.86e-10	2.26e-07	12.9711	Cacnb3	7	calcium voltage-gated channel auxiliary subunit beta 3	ENSG00000167535	CACNB3	1	784
ENSRNOG00000003745	2.91726	3.4182	18.2254	1.01e-09	2.27e-07	12.9367	Atf3	13	activating transcription factor 3	ENSG00000162772	ATF3	1	467
ENSRNOG00000028247	1.85468	3.36786	18.1913	1.03e-09	2.28e-07	12.9299	Ankrd13d	1	ankyrin repeat domain 13D	ENSG00000172932	ANKRD13D	1	338692
ENSRNOG00000001704	3.60738	4.14696	18.0159	1.14e-09	2.42e-07	12.8328	Runx1	11	runt-related transcription factor 1	ENSG00000159216	RUNX1	1	861
ENSRNOG00000001704	3.60738	4.14696	18.0159	1.14e-09	2.42e-07	12.8328	Runx1	11	runt-related transcription factor 1	ENSG00000159216	RUNX1	1	100506403
ENSRNOG00000015498	2.11665	3.82049	18.0601	1.11e-09	2.42e-07	12.8603	Il17rb	16	interleukin 17 receptor B	ENSG00000056736	IL17RB	1	55540
ENSRNOG00000004361	1.32956	5.59841	18.009	1.15e-09	2.42e-07	12.7432	Parp10	7	poly (ADP-ribose) polymerase family, member 10	ENSG00000178685	PARP10	1	84875
ENSRNOG00000002667	3.11354	6.11133	17.8688	1.25e-09	2.6e-07	12.676	Lamc2	13	laminin subunit gamma 2	ENSG00000058085	LAMC2	1	3918
ENSRNOG00000003217	2.12749	6.6385	17.8263	1.28e-09	2.63e-07	12.6154	Lgals3bp	10	galectin 3 binding protein	ENSG00000108679	LGALS3BP	1	3959
ENSRNOG00000010645	1.7893	4.97715	17.7763	1.32e-09	2.67e-07	12.6427	Lgals3	15	galectin 3	ENSG00000131981	LGALS3	1	3958
ENSRNOG00000006231	-1.72206	5.66826	-17.6806	1.4e-09	2.79e-07	12.5517	Ptpro	4	protein tyrosine phosphatase, receptor type, O	ENSG00000151490	PTPRO	1	5800
ENSRNOG00000049766	2.85306	3.40922	17.5911	1.48e-09	2.9e-07	12.5645	Sctr	13	secretin receptor	ENSG00000080293	SCTR	1	6344
ENSRNOG00000032417	2.96679	4.1106	17.3203	1.76e-09	3.3e-07	12.4006	Gabrp	10	gamma-aminobutyric acid type A receptor pi subunit	ENSG00000094755	GABRP	1	2568
ENSRNOG00000020431	2.298	2.69324	17.3169	1.76e-09	3.3e-07	12.3316	Matk	7	megakaryocyte-associated tyrosine kinase	ENSG00000007264	MATK	1	4145
ENSRNOG00000060773	2.1057	2.99872	17.3308	1.74e-09	3.3e-07	12.3883	Sertad4	13	SERTA domain containing 4	ENSG00000082497	SERTAD4	1	56256
ENSRNOG00000005540	1.17358	6.11978	17.2853	1.8e-09	3.32e-07	12.26	Nin	6	ninein	ENSG00000100503	NIN	1	51199
ENSRNOG00000020164	6.01563	4.68045	17.2098	1.88e-09	3.35e-07	12.3259	Ifitm10	1	interferon induced transmembrane protein 10	ENSG00000244242	IFITM10	1	402778
ENSRNOG00000008816	4.55957	4.64289	17.1031	2.02e-09	3.35e-07	12.2695	Gpnmb	4	glycoprotein nmb	ENSG00000136235	GPNMB	1	10457
ENSRNOG00000009588	3.23704	2.58547	17.1611	1.94e-09	3.35e-07	12.1923	Snph	3	syntaphilin	ENSG00000101298	SNPH	1	9751
ENSRNOG00000037190	3.19427	1.23151	17.0732	2.05e-09	3.35e-07	11.7256	Cd101	2	CD101 molecule	ENSG00000134256	CD101	1	9398
ENSRNOG00000006094	2.98894	5.67661	17.1763	1.92e-09	3.35e-07	12.2356	Cd44	3	CD44 molecule (Indian blood group)	ENSG00000026508	CD44	1	960
ENSRNOG00000013653	2.04663	5.44299	17.0662	2.06e-09	3.35e-07	12.156	Pdlim7	17	PDZ and LIM domain 7	ENSG00000196923	PDLIM7	1	9260
ENSRNOG00000016825	1.86033	3.62126	17.0827	2.04e-09	3.35e-07	12.2558	Cd3eap	1	CD3e molecule associated protein	ENSG00000117877	CD3EAP	1	10849
ENSRNOG00000009955	1.14334	4.69545	17.068	2.06e-09	3.35e-07	12.1782	Plch1	2	phospholipase C, eta 1	ENSG00000114805	PLCH1	1	23007
ENSRNOG00000003428	-0.958494	6.96437	-17.2064	1.89e-09	3.35e-07	12.21	Rufy3	14	RUN and FYVE domain containing 3	ENSG00000018189	RUFY3	1	22902
ENSRNOG00000011071	-1.97073	5.53852	-17.0976	2.02e-09	3.35e-07	12.1857	Nt5e	8	5' nucleotidase, ecto	ENSG00000135318	NT5E	1	4907
ENSRNOG00000036760	3.65081	1.99856	16.8325	2.4e-09	3.43e-07	11.8478	Tmc5	1	transmembrane channel-like 5	ENSG00000103534	TMC5	1	79838
ENSRNOG00000047247	2.3774	6.76933	16.8582	2.36e-09	3.43e-07	11.9837	Ptprs	9	protein tyrosine phosphatase, receptor type, S	ENSG00000105426	PTPRS	1	5802
ENSRNOG00000010947	1.92455	6.47837	16.854	2.36e-09	3.43e-07	11.9761	Mmp14	15	matrix metallopeptidase 14	ENSG00000157227	MMP14	1	4323
ENSRNOG00000036859	1.88753	3.93751	16.8559	2.36e-09	3.43e-07	12.1032	Gdpd5	1	glycerophosphodiester phosphodiesterase domain containing 5	ENSG00000158555	GDPD5	1	81544
ENSRNOG00000033235	1.65922	4.71335	16.9078	2.28e-09	3.43e-07	12.0848	Relb	1	RELB proto-oncogene, NF-kB subunit	ENSG00000104856	RELB	1	5971
ENSRNOG00000014453	1.31408	6.82408	16.9468	2.23e-09	3.43e-07	12.0311	Anxa5	2	annexin A5	ENSG00000164111	ANXA5	1	308
ENSRNOG00000050703	1.21643	5.40315	16.8671	2.34e-09	3.43e-07	12.0071	Fam115c	4	family with sequence similarity 115, member C	ENSG00000170379	TCAF2	1	285966
ENSRNOG00000050703	1.21643	5.40315	16.8671	2.34e-09	3.43e-07	12.0071	Fam115c	4	family with sequence similarity 115, member C	ENSG00000283528	TCAF2C	1	NA
ENSRNOG00000016367	1.12036	6.64877	16.8486	2.37e-09	3.43e-07	11.9629	Vasp	1	vasodilator-stimulated phosphoprotein	ENSG00000125753	VASP	1	7408
ENSRNOG00000004049	-0.799906	5.71304	-16.9819	2.18e-09	3.43e-07	12.0776	Baiap2	10	BAI1-associated protein 2	ENSG00000175866	BAIAP2	1	10458
ENSRNOG00000011794	-2.00562	4.46207	-16.9036	2.29e-09	3.43e-07	12.1161	Tcea3	5	transcription elongation factor A3	ENSG00000204219	TCEA3	1	6920
ENSRNOG00000019830	-2.74014	2.64275	-16.8773	2.33e-09	3.43e-07	12.0211	Hsd17b1	10	hydroxysteroid (17-beta) dehydrogenase 1	ENSG00000108786	HSD17B1	1	3292
ENSRNOG00000003546	2.64845	5.15953	16.7545	2.52e-09	3.44e-07	11.9772	Tnfrsf12a	10	TNF receptor superfamily member 12A	ENSG00000006327	TNFRSF12A	1	51330
ENSRNOG00000013747	2.38076	5.22475	16.8129	2.43e-09	3.44e-07	12.0075	Sh3bp2	14	SH3-domain binding protein 2	ENSG00000087266	SH3BP2	1	6452
ENSRNOG00000017854	1.84459	6.38197	16.7651	2.5e-09	3.44e-07	11.9171	Ucp2	1	uncoupling protein 2	ENSG00000175567	UCP2	1	7351
ENSRNOG00000056837	1.53023	5.69963	16.7479	2.53e-09	3.44e-07	11.9194	Abr	10	active BCR-related	ENSG00000159842	ABR	1	29
ENSRNOG00000002456	-2.85015	2.70361	-16.7952	2.46e-09	3.44e-07	11.9849	Hlf	10	HLF, PAR bZIP transcription factor	ENSG00000108924	HLF	1	3131
ENSRNOG00000013974	-1.66464	6.08044	-16.7267	2.57e-09	3.45e-07	11.9075	Fahd2a	3	fumarylacetoacetate hydrolase domain containing 2A	ENSG00000115042	FAHD2A	1	51011
ENSRNOG00000047466	4.8105	-0.493083	16.706	2.6e-09	3.47e-07	10.0482	Bdnf	3	brain-derived neurotrophic factor	ENSG00000176697	BDNF	1	627
ENSRNOG00000006236	2.44961	1.65893	16.6623	2.68e-09	3.53e-07	11.6837	Dsn1	3	DSN1 homolog, MIS12 kinetochore complex component	ENSG00000149636	DSN1	1	79980
ENSRNOG00000007970	2.98322	3.00335	16.6264	2.74e-09	3.54e-07	11.9436	Plxnc1	7	plexin C1	ENSG00000136040	PLXNC1	1	10154
ENSRNOG00000046482	-1.81934	3.25894	-16.6275	2.74e-09	3.54e-07	11.9629	Znf750	10	zinc finger protein 750	ENSG00000141579	ZNF750	1	79755
ENSRNOG00000020716	2.53066	7.217	16.5461	2.89e-09	3.66e-07	11.774	Axl	1	Axl receptor tyrosine kinase	ENSG00000167601	AXL	1	558
ENSRNOG00000003442	1.83514	4.20842	16.5553	2.87e-09	3.66e-07	11.8981	Adora1	13	adenosine A1 receptor	ENSG00000163485	ADORA1	1	134
ENSRNOG00000016117	1.76061	8.28512	16.5303	2.92e-09	3.67e-07	11.7829	Myof	1	myoferlin	ENSG00000138119	MYOF	1	26509
ENSRNOG00000048222	2.01934	5.05955	16.4852	3.01e-09	3.71e-07	11.7816	Nlrc5	19	NLR family, CARD domain containing 5	ENSG00000140853	NLRC5	1	84166
ENSRNOG00000015318	1.8118	5.15924	16.4928	2.99e-09	3.71e-07	11.777	Heyl	5	hes-related family bHLH transcription factor with YRPW motif-like	ENSG00000163909	HEYL	1	26508
ENSRNOG00000003538	3.54413	4.07149	16.4061	3.17e-09	3.8e-07	11.8165	Adamts4	13	ADAM metallopeptidase with thrombospondin type 1 motif, 4	ENSG00000158859	ADAMTS4	1	9507
ENSRNOG00000051470	2.12588	2.5451	16.4194	3.14e-09	3.8e-07	11.7733	Card9	3	caspase recruitment domain family, member 9	ENSG00000187796	CARD9	1	64170
ENSRNOG00000057367	-1.75748	8.84678	-16.4206	3.14e-09	3.8e-07	11.7286	Glud1	16	glutamate dehydrogenase 1	ENSG00000148672	GLUD1	1	2746
ENSRNOG00000057367	-1.75748	8.84678	-16.4206	3.14e-09	3.8e-07	11.7286	Glud1	16	glutamate dehydrogenase 1	ENSG00000182890	GLUD2	1	2747
ENSRNOG00000019737	1.45706	7.93711	16.3529	3.28e-09	3.83e-07	11.6505	Sema4a	2	semaphorin 4A	ENSG00000196189	SEMA4A	1	64218
ENSRNOG00000019656	-1.23117	5.47777	-16.342	3.31e-09	3.83e-07	11.6602	Btd	16	biotinidase	ENSG00000169814	BTD	1	686
ENSRNOG00000026962	-1.60918	7.12227	-16.3603	3.27e-09	3.83e-07	11.6451	Osbpl8	7	oxysterol binding protein-like 8	ENSG00000091039	OSBPL8	1	114882
ENSRNOG00000047734	-1.75141	5.93805	-16.3478	3.29e-09	3.83e-07	11.6556	Chst2	8	carbohydrate sulfotransferase 2	ENSG00000175040	CHST2	1	9435
ENSRNOG00000016519	-1.48443	5.95968	-16.2046	3.62e-09	4.12e-07	11.5495	Kdm1b	17	lysine demethylase 1B	ENSG00000165097	KDM1B	1	221656
ENSRNOG00000000187	-2.11836	7.74752	-16.2147	3.6e-09	4.12e-07	11.5596	Csf2rb	7	colony stimulating factor 2 receptor beta common subunit	ENSG00000100368	CSF2RB	1	1439
ENSRNOG00000019500	-6.75158	2.92175	-16.1682	3.71e-09	4.19e-07	11.1458	Cyp1a1	8	cytochrome P450, family 1, subfamily a, polypeptide 1	ENSG00000140465	CYP1A1	1	1543
ENSRNOG00000015906	2.24449	5.03076	16.1385	3.79e-09	4.2e-07	11.558	Tgif1	9	TGFB-induced factor homeobox 1	ENSG00000177426	TGIF1	1	7050
ENSRNOG00000008005	1.78688	6.12793	16.1262	3.82e-09	4.2e-07	11.4791	Akna	5	AT-hook transcription factor	ENSG00000106948	AKNA	1	80709
ENSRNOG00000018184	1.54182	7.78151	16.1395	3.79e-09	4.2e-07	11.4947	Tpm1	8	tropomyosin 1, alpha	ENSG00000140416	TPM1	1	7168
ENSRNOG00000005849	-1.77886	7.99754	-16.1083	3.87e-09	4.22e-07	11.488	Aco1	5	aconitase 1	ENSG00000122729	ACO1	1	48
ENSRNOG00000015385	-2.00109	7.72459	-16.0928	3.91e-09	4.23e-07	11.4724	Pink1	5	PTEN induced putative kinase 1	ENSG00000158828	PINK1	1	65018
ENSRNOG00000033153	2.96997	3.21745	15.9576	4.28e-09	4.3e-07	11.5153	Sfn	5	stratifin	ENSG00000175793	SFN	1	2810
ENSRNOG00000003657	2.27793	2.95846	15.9734	4.24e-09	4.3e-07	11.5261	Pkmyt1	10	protein kinase, membrane associated tyrosine/threonine 1	ENSG00000127564	PKMYT1	1	9088
ENSRNOG00000060614	2.1208	6.43522	15.995	4.17e-09	4.3e-07	11.3858	Pxdn	6	peroxidasin	ENSG00000130508	PXDN	1	7837
ENSRNOG00000013987	1.95818	7.96903	16.001	4.16e-09	4.3e-07	11.4039	Sbno2	7	strawberry notch homolog 2	ENSG00000064932	SBNO2	1	22904
ENSRNOG00000049517	1.93116	4.31869	15.9223	4.38e-09	4.3e-07	11.4539	Tnfaip3	1	TNF alpha induced protein 3	ENSG00000118503	TNFAIP3	1	7128
ENSRNOG00000020206	1.89307	10.1028	15.9402	4.33e-09	4.3e-07	11.4359	Ctsd	1	cathepsin D	ENSG00000250644	AC068580.4	1	NA
ENSRNOG00000020206	1.89307	10.1028	15.9402	4.33e-09	4.3e-07	11.4359	Ctsd	1	cathepsin D	ENSG00000117984	CTSD	1	1509
ENSRNOG00000013048	1.46858	4.2495	16.0031	4.15e-09	4.3e-07	11.4946	Pde7a	2	phosphodiesterase 7A	ENSG00000205268	PDE7A	1	5150
ENSRNOG00000019311	1.35409	6.1032	15.9213	4.39e-09	4.3e-07	11.3278	Nfkb2	1	nuclear factor kappa B subunit 2	ENSG00000077150	NFKB2	1	4791
ENSRNOG00000052113	1.212	7.55726	15.9602	4.27e-09	4.3e-07	11.3602	Ppp1r9b	10	protein phosphatase 1, regulatory subunit 9B	ENSG00000108819	PPP1R9B	1	84687
ENSRNOG00000000991	1.20964	7.83051	15.9653	4.26e-09	4.3e-07	11.3706	Arpc1b	12	actin related protein 2/3 complex, subunit 1B	ENSG00000130429	ARPC1B	1	10095
ENSRNOG00000013167	1.14977	3.71823	15.952	4.3e-09	4.3e-07	11.5028	Hmgb2l1	16	high mobility group box 2-like 1	ENSG00000164104	HMGB2	1	3148
ENSRNOG00000042274	-0.968775	5.78787	-16.0473	4.03e-09	4.3e-07	11.4348	Fbxo31	19	F-box protein 31	ENSG00000103264	FBXO31	1	79791
ENSRNOG00000007947	-1.13362	6.07967	-15.9504	4.3e-09	4.3e-07	11.3603	Fam13a	4	family with sequence similarity 13, member A	ENSG00000138640	FAM13A	1	10144
ENSRNOG00000012964	4.10506	-0.608431	15.8949	4.47e-09	4.34e-07	9.88201	Ccr6	1	C-C motif chemokine receptor 6	ENSG00000112486	CCR6	1	1235
ENSRNOG00000014424	2.91588	6.28587	15.872	4.54e-09	4.38e-07	11.3197	RGD1563354	3	similar to hypothetical protein D630003M21	ENSG00000149633	KIAA1755	1	85449
ENSRNOG00000011879	0.810132	9.0541	15.8176	4.71e-09	4.51e-07	11.3085	Nfat5	19	nuclear factor of activated T-cells 5	ENSG00000102908	NFAT5	1	10725
ENSRNOG00000018669	1.24123	6.69505	15.7965	4.78e-09	4.52e-07	11.23	Jak3	16	Janus kinase 3	ENSG00000105639	JAK3	1	3718
ENSRNOG00000022868	-1.93029	4.15922	-15.7942	4.79e-09	4.52e-07	11.3795	Ell3	3	elongation factor for RNA polymerase II 3	ENSG00000128886	ELL3	1	80237
ENSRNOG00000043416	2.56065	5.00629	15.7694	4.87e-09	4.55e-07	11.3039	Bcl3	1	B-cell CLL/lymphoma 3	ENSG00000069399	BCL3	1	602
ENSRNOG00000011683	1.70787	4.88648	15.7493	4.94e-09	4.55e-07	11.2793	Fes	1	FES proto-oncogene, tyrosine kinase	ENSG00000182511	FES	1	2242
ENSRNOG00000019528	1.67813	3.75558	15.7346	4.99e-09	4.55e-07	11.3483	Plekhg6	4	pleckstrin homology and RhoGEF domain containing G6	ENSG00000008323	PLEKHG6	1	55200
ENSRNOG00000007254	1.62881	3.52337	15.7542	4.92e-09	4.55e-07	11.3761	Ttc9	6	tetratricopeptide repeat domain 9	ENSG00000133985	TTC9	1	23508
ENSRNOG00000051952	1.22373	5.01399	15.745	4.95e-09	4.55e-07	11.2571	Tes	4	testin LIM domain protein	ENSG00000135269	TES	1	26136
ENSRNOG00000004316	-4.98154	-3.25609	-15.7176	5.04e-09	4.57e-07	7.90466	LOC100911956	7	protein LLP homolog	ENSG00000139233	LLPH	1	84298
ENSRNOG00000008754	-1.98929	3.97131	-15.7031	5.1e-09	4.58e-07	11.3284	Flvcr2	6	feline leukemia virus subgroup C cellular receptor family, member 2	ENSG00000119686	FLVCR2	1	55640
ENSRNOG00000049236	1.4571	11.251	15.6818	5.17e-09	4.62e-07	11.286	Myh9l1	7	myosin heavy chain 9-like 1	ENSG00000100345	MYH9	1	4627
ENSRNOG00000049385	2.26566	6.41879	15.6634	5.24e-09	4.65e-07	11.1524	Adamtsl4	2	ADAMTS-like 4	ENSG00000143382	ADAMTSL4	1	54507
ENSRNOG00000011778	-2.7664	5.57743	-15.6532	5.27e-09	4.65e-07	11.2172	Blvra	3	biliverdin reductase A	ENSG00000106605	BLVRA	1	644
ENSRNOG00000053239	2.78378	3.872	15.6416	5.32e-09	4.66e-07	11.2943	Clmp	8	CXADR-like membrane protein	ENSG00000166250	CLMP	1	79827
ENSRNOG00000027894	4.53161	2.65309	15.6141	5.42e-09	4.69e-07	11.1879	Iqgap3	2	IQ motif containing GTPase activating protein 3	ENSG00000183856	IQGAP3	1	128239
ENSRNOG00000055433	3.01518	2.07161	15.5588	5.63e-09	4.69e-07	11.0981	Trim46	2	tripartite motif-containing 46	ENSG00000163462	TRIM46	1	80128
ENSRNOG00000000499	2.74652	2.52241	15.5664	5.6e-09	4.69e-07	11.2272	Tcp11	20	t-complex 11	ENSG00000124678	TCP11	1	6954
ENSRNOG00000018815	2.68332	1.59294	15.5631	5.61e-09	4.69e-07	11.0135	Plk1	1	polo-like kinase 1	ENSG00000166851	PLK1	1	5347
ENSRNOG00000015674	2.24882	4.68365	15.5945	5.49e-09	4.69e-07	11.1868	Acap1	10	ArfGAP with coiled-coil, ankyrin repeat and PH domains 1	ENSG00000072818	ACAP1	1	9744
ENSRNOG00000016413	2.1664	3.37816	15.6142	5.42e-09	4.69e-07	11.2857	Pstpip1	8	proline-serine-threonine phosphatase-interacting protein 1	ENSG00000140368	PSTPIP1	1	9051
ENSRNOG00000004411	1.70907	4.92477	15.5544	5.65e-09	4.69e-07	11.1359	Tspan8	7	tetraspanin 8	ENSG00000127324	TSPAN8	1	7103
ENSRNOG00000019698	1.20556	5.80022	15.5992	5.48e-09	4.69e-07	11.1036	Ssbp4	16	single stranded DNA binding protein 4	ENSG00000130511	SSBP4	1	170463
ENSRNOG00000034026	-1.38025	5.4079	-15.5497	5.67e-09	4.69e-07	11.1081	Lclat1	6	lysocardiolipin acyltransferase 1	ENSG00000172954	LCLAT1	1	253558
ENSRNOG00000010721	2.50138	2.18303	15.5222	5.78e-09	4.72e-07	11.1253	Dlgap5	15	DLG associated protein 5	ENSG00000126787	DLGAP5	1	9787
ENSRNOG00000001823	-1.19871	7.79831	-15.5297	5.75e-09	4.72e-07	11.0631	St6gal1	11	ST6 beta-galactoside alpha-2,6-sialyltransferase 1	ENSG00000073849	ST6GAL1	1	6480
ENSRNOG00000014080	2.4981	2.11193	15.4869	5.92e-09	4.76e-07	11.0984	Kif23	8	kinesin family member 23	ENSG00000137807	KIF23	1	9493
ENSRNOG00000018087	2.4194	8.19093	15.4998	5.87e-09	4.76e-07	11.0509	Vim	17	vimentin	ENSG00000026025	VIM	1	7431
ENSRNOG00000013045	1.23604	5.40277	15.4828	5.94e-09	4.76e-07	11.0374	Setd7	2	SET domain containing (lysine methyltransferase) 7	ENSG00000145391	SETD7	1	80854
ENSRNOG00000004749	-1.71745	6.31034	-15.4683	6e-09	4.78e-07	11.019	Slc30a1	13	solute carrier family 30 member 1	ENSG00000170385	SLC30A1	1	7779
ENSRNOG00000030763	-1.92481	8.4782	-15.4515	6.07e-09	4.81e-07	11.0305	Dpp4	3	dipeptidylpeptidase 4	ENSG00000197635	DPP4	1	1803
ENSRNOG00000013659	-1.14107	7.27478	-15.4293	6.16e-09	4.86e-07	10.9773	Tex2	10	testis expressed 2	ENSG00000136478	TEX2	1	55852
ENSRNOG00000006767	2.90892	0.0534936	15.415	6.23e-09	4.88e-07	10.2367	Cst7	3	cystatin F	ENSG00000077984	CST7	1	8530
ENSRNOG00000002403	3.23559	6.54594	15.4034	6.28e-09	4.89e-07	10.9829	Fam129a	13	family with sequence similarity 129, member A	ENSG00000135842	NIBAN1	1	116496
ENSRNOG00000014703	1.85444	1.7735	15.3567	6.49e-09	5.02e-07	10.9636	Tonsl	7	tonsoku-like, DNA repair protein	ENSG00000160949	TONSL	1	4796
ENSRNOG00000017693	-3.14988	4.62607	-15.3404	6.56e-09	5.05e-07	11.0545	Slc2a5	5	solute carrier family 2 member 5	ENSG00000142583	SLC2A5	1	6518
ENSRNOG00000011032	1.84952	5.70098	15.2968	6.77e-09	5.18e-07	10.8979	Lhfpl2	2	lipoma HMGIC fusion partner-like 2	ENSG00000145685	LHFPL2	1	10184
ENSRNOG00000011921	2.1843	4.18202	15.2696	6.9e-09	5.19e-07	11.001	Dusp4	16	dual specificity phosphatase 4	ENSG00000120875	DUSP4	1	1846
ENSRNOG00000028586	1.59998	2.86901	15.2739	6.88e-09	5.19e-07	11.0494	Mcph1	16	microcephalin 1	ENSG00000147316	MCPH1	1	79648
ENSRNOG00000001229	1.05885	9.67568	15.2601	6.94e-09	5.19e-07	10.9271	Col18a1	20	collagen type XVIII alpha 1 chain	ENSG00000182871	COL18A1	1	80781
ENSRNOG00000002937	-3.79066	2.65467	-15.2674	6.91e-09	5.19e-07	10.9517	Ren	13	renin	ENSG00000143839	REN	1	5972
ENSRNOG00000046848	2.91681	3.36249	15.2044	7.22e-09	5.35e-07	11.0012	PCOLCE2	8	procollagen C-endopeptidase enhancer 2	ENSG00000163710	PCOLCE2	1	26577
ENSRNOG00000019918	-0.948154	5.79821	-15.196	7.27e-09	5.35e-07	10.8157	Coasy	10	Coenzyme A synthase	ENSG00000068120	COASY	1	80347
ENSRNOG00000002878	-3.72693	3.76357	-15.1986	7.25e-09	5.35e-07	10.9979	Afm	14	afamin	ENSG00000079557	AFM	1	173
ENSRNOG00000024846	1.65046	5.84931	15.1821	7.34e-09	5.37e-07	10.8018	Ier5l	3	immediate early response 5-like	ENSG00000188483	IER5L	1	389792
ENSRNOG00000015206	-1.61166	5.75657	-15.1633	7.44e-09	5.38e-07	10.8083	Alad	5	aminolevulinate dehydratase	ENSG00000148218	ALAD	1	210
ENSRNOG00000017669	-1.74407	7.17174	-15.1639	7.43e-09	5.38e-07	10.7863	Chd1l	2	chromodomain helicase DNA binding protein 1-like	ENSG00000131778	CHD1L	1	9557
ENSRNOG00000005807	2.7601	2.51534	15.1334	7.6e-09	5.41e-07	10.914	Ptpn7	13	protein tyrosine phosphatase, non-receptor type 7	ENSG00000143851	PTPN7	1	5778
ENSRNOG00000000860	1.96321	4.41465	15.1273	7.63e-09	5.41e-07	10.8702	Vwa7	20	von Willebrand factor A domain containing 7	ENSG00000204396	VWA7	1	80737
ENSRNOG00000053240	1.47924	7.63028	15.1434	7.54e-09	5.41e-07	10.7672	Soga1	3	suppressor of glucose, autophagy associated 1	ENSG00000149639	SOGA1	1	140710
ENSRNOG00000012508	-2.71008	4.71619	-15.126	7.64e-09	5.41e-07	10.8885	Slc39a8	2	solute carrier family 39 member 8	ENSG00000138821	SLC39A8	1	64116
ENSRNOG00000018441	1.80727	2.09382	15.0983	7.79e-09	5.49e-07	10.8636	Ggt7	3	gamma-glutamyltransferase 7	ENSG00000131067	GGT7	1	2686
ENSRNOG00000032261	-2.38866	3.92829	-15.0778	7.91e-09	5.54e-07	10.8931	Cyp2d4	7	cytochrome P450, family 2, subfamily d, polypeptide 4	ENSG00000205702	CYP2D7	1	1564
ENSRNOG00000032261	-2.38866	3.92829	-15.0778	7.91e-09	5.54e-07	10.8931	Cyp2d4	7	cytochrome P450, family 2, subfamily d, polypeptide 4	ENSG00000100197	CYP2D6	1	1565
ENSRNOG00000032261	-2.38866	3.92829	-15.0778	7.91e-09	5.54e-07	10.8931	Cyp2d4	7	cytochrome P450, family 2, subfamily d, polypeptide 4	ENSG00000100197	CYP2D6	1	107987478
ENSRNOG00000032261	-2.38866	3.92829	-15.0778	7.91e-09	5.54e-07	10.8931	Cyp2d4	7	cytochrome P450, family 2, subfamily d, polypeptide 4	ENSG00000100197	CYP2D6	1	107987479
ENSRNOG00000021086	1.61057	4.95411	15.0657	7.97e-09	5.56e-07	10.779	Dtx4	1	deltex E3 ubiquitin ligase 4	ENSG00000110042	DTX4	1	23220
ENSRNOG00000046452	3.75371	1.35406	15.0165	8.26e-09	5.59e-07	10.5052	Fcgr2b	13	Fc fragment of IgG receptor IIb	ENSG00000072694	FCGR2B	1	2213
ENSRNOG00000046452	3.75371	1.35406	15.0165	8.26e-09	5.59e-07	10.5052	Fcgr2b	13	Fc fragment of IgG receptor IIb	ENSG00000143226	FCGR2A	0	2212
ENSRNOG00000046452	3.75371	1.35406	15.0165	8.26e-09	5.59e-07	10.5052	Fcgr2b	13	Fc fragment of IgG receptor IIb	ENSG00000143226	FCGR2A	0	9103
ENSRNOG00000046452	3.75371	1.35406	15.0165	8.26e-09	5.59e-07	10.5052	Fcgr2b	13	Fc fragment of IgG receptor IIb	ENSG00000244682	FCGR2C	0	NA
ENSRNOG00000011777	2.97576	1.57221	15.0193	8.24e-09	5.59e-07	10.6561	Spag5	10	sperm associated antigen 5	ENSG00000258472	AC005726.1	0	NA
ENSRNOG00000011777	2.97576	1.57221	15.0193	8.24e-09	5.59e-07	10.6561	Spag5	10	sperm associated antigen 5	ENSG00000076382	SPAG5	1	10615
ENSRNOG00000003300	1.6201	6.39983	15.0206	8.24e-09	5.59e-07	10.6646	Btg2	13	BTG anti-proliferation factor 2	ENSG00000159388	BTG2	1	7832
ENSRNOG00000011459	1.60259	5.62993	15.0386	8.13e-09	5.59e-07	10.7036	Rhbdf2	10	rhomboid 5 homolog 2	ENSG00000129667	RHBDF2	1	79651
ENSRNOG00000012954	-1.01955	5.24772	-15.0144	8.27e-09	5.59e-07	10.71	Eefsec	4	eukaryotic elongation factor, selenocysteine-tRNA-specific	ENSG00000132394	EEFSEC	1	60678
ENSRNOG00000037815	-2.19281	6.46851	-15.0346	8.15e-09	5.59e-07	10.7036	Acad10	12	acyl-CoA dehydrogenase family, member 10	ENSG00000111271	ACAD10	1	80724
ENSRNOG00000005096	1.46119	5.3163	15.0024	8.34e-09	5.61e-07	10.6907	Bzw2	6	basic leucine zipper and W2 domains 2	ENSG00000136261	BZW2	1	28969
ENSRNOG00000026870	5.28709	-0.652558	14.9921	8.41e-09	5.62e-07	9.20439	Clic6	11	chloride intracellular channel 6	ENSG00000159212	CLIC6	1	54102
ENSRNOG00000005936	1.36367	3.27277	14.9824	8.47e-09	5.62e-07	10.8367	Foxm1	4	forkhead box M1	ENSG00000111206	FOXM1	1	2305
ENSRNOG00000027017	1.23354	4.13807	14.9802	8.48e-09	5.62e-07	10.7715	Rnasel	13	ribonuclease L	ENSG00000135828	RNASEL	1	6041
ENSRNOG00000058545	1.6969	5.18926	14.9643	8.58e-09	5.63e-07	10.6712	Arhgap4	X	Rho GTPase activating protein 4	ENSG00000089820	ARHGAP4	1	393
ENSRNOG00000023972	1.38253	9.58868	14.9694	8.55e-09	5.63e-07	10.7068	Col4a2	16	collagen type IV alpha 2 chain	ENSG00000134871	COL4A2	1	1284
ENSRNOG00000020505	2.26094	3.9257	14.9403	8.73e-09	5.67e-07	10.779	Map4k1	1	mitogen activated protein kinase kinase kinase kinase 1	ENSG00000104814	MAP4K1	1	11184
ENSRNOG00000017105	-2.08226	5.24682	-14.9446	8.7e-09	5.67e-07	10.6868	Dpyd	2	dihydropyrimidine dehydrogenase	ENSG00000188641	DPYD	1	1806
ENSRNOG00000053400	3.99075	2.44894	14.8883	9.06e-09	5.69e-07	10.7188	Cfi	2	complement factor I	ENSG00000205403	CFI	1	3426
ENSRNOG00000053400	3.99075	2.44894	14.8883	9.06e-09	5.69e-07	10.7188	Cfi	2	complement factor I	ENSG00000285330	AC126283.2	1	NA
ENSRNOG00000004626	2.66835	7.54587	14.8823	9.1e-09	5.69e-07	10.5784	Slc34a2	14	solute carrier family 34 member 2	ENSG00000157765	SLC34A2	1	10568
ENSRNOG00000003348	2.51046	3.86059	14.9222	8.84e-09	5.69e-07	10.7821	Rasd1	10	ras related dexamethasone induced 1	ENSG00000108551	RASD1	1	51655
ENSRNOG00000013064	2.30972	2.94518	14.917	8.87e-09	5.69e-07	10.7971	Lrp8	5	LDL receptor related protein 8	ENSG00000157193	LRP8	1	7804
ENSRNOG00000009113	2.14622	4.84597	14.8952	9.02e-09	5.69e-07	10.6659	Marcksl1	5	MARCKS-like 1	ENSG00000175130	MARCKSL1	1	65108
ENSRNOG00000052795	2.00347	8.52849	14.9047	8.95e-09	5.69e-07	10.6208	Itpr3	20	inositol 1,4,5-trisphosphate receptor, type 3	ENSG00000096433	ITPR3	1	3710
ENSRNOG00000006916	-1.79979	7.04841	-14.902	8.97e-09	5.69e-07	10.5882	Sardh	3	sarcosine dehydrogenase	ENSG00000123453	SARDH	1	1757
ENSRNOG00000016062	-1.9961	6.15349	-14.8963	9.01e-09	5.69e-07	10.6051	Snta1	3	syntrophin, alpha 1	ENSG00000101400	SNTA1	1	6640
ENSRNOG00000018715	2.15468	3.08443	14.8612	9.24e-09	5.73e-07	10.7573	Clec10a	10	C-type lectin domain family 10, member A	ENSG00000132514	CLEC10A	1	10462
ENSRNOG00000012290	-2.66323	3.91369	-14.8594	9.25e-09	5.73e-07	10.7351	Gchfr	3	GTP cyclohydrolase I feedback regulator	ENSG00000137880	GCHFR	1	2644
ENSRNOG00000000485	1.33328	4.84799	14.8511	9.31e-09	5.74e-07	10.6137	Bak1	20	BCL2-antagonist/killer 1	ENSG00000030110	BAK1	1	578
ENSRNOG00000022711	-3.19063	4.33405	-14.8401	9.38e-09	5.76e-07	10.7108	Slco4c1	9	solute carrier organic anion transporter family, member 4C1	ENSG00000173930	SLCO4C1	1	353189
ENSRNOG00000009681	0.940367	7.28008	14.825	9.49e-09	5.79e-07	10.5162	Flot2	10	flotillin 2	ENSG00000132589	FLOT2	1	2319
ENSRNOG00000007483	3.49638	1.60814	14.7967	9.68e-09	5.89e-07	10.511	Ccnf	10	cyclin F	ENSG00000162063	CCNF	1	899
ENSRNOG00000026914	2.12066	4.88088	14.7674	9.89e-09	5.89e-07	10.5582	Dnah1	16	dynein, axonemal, heavy chain 1	ENSG00000114841	DNAH1	1	25981
ENSRNOG00000001692	2.0677	1.54966	14.7663	9.9e-09	5.89e-07	10.5449	Chaf1b	11	chromatin assembly factor 1 subunit B	ENSG00000159259	CHAF1B	1	8208
ENSRNOG00000007439	1.68937	3.74165	14.7684	9.89e-09	5.89e-07	10.6495	Unc13d	10	unc-13 homolog D	ENSG00000092929	UNC13D	1	201294
ENSRNOG00000019907	1.62442	4.97545	14.7795	9.81e-09	5.89e-07	10.5504	Nfkbie	9	NFKB inhibitor epsilon	ENSG00000146232	NFKBIE	1	4794
ENSRNOG00000005965	1.03172	4.17729	14.7747	9.84e-09	5.89e-07	10.6144	Irak4	7	interleukin-1 receptor-associated kinase 4	ENSG00000198001	IRAK4	1	51135
ENSRNOG00000020653	1.53581	3.78586	14.7437	1.01e-08	5.96e-07	10.6318	S1pr2	8	sphingosine-1-phosphate receptor 2	ENSG00000267534	S1PR2	1	9294
ENSRNOG00000004303	-1.7822	7.71092	-14.7201	1.02e-08	6.03e-07	10.4583	Timp3	7	TIMP metallopeptidase inhibitor 3	ENSG00000100234	TIMP3	1	7078
ENSRNOG00000030983	-2.2859	5.32895	-14.7146	1.03e-08	6.03e-07	10.5168	B3galt5	11	Beta-1,3-galactosyltransferase 5	ENSG00000183778	B3GALT5	1	10317
ENSRNOG00000013954	-3.70437	6.86742	-14.6788	1.06e-08	6.16e-07	10.4649	Alpl	5	alkaline phosphatase, liver/bone/kidney	ENSG00000162551	ALPL	1	249
ENSRNOG00000007923	-2.68413	3.64909	-14.6517	1.08e-08	6.26e-07	10.6001	Cgref1	6	cell growth regulator with EF hand domain 1	ENSG00000138028	CGREF1	1	10669
ENSRNOG00000002305	-2.50274	6.66268	-14.6403	1.09e-08	6.29e-07	10.4041	Slc15a2	11	solute carrier family 15 member 2	ENSG00000163406	SLC15A2	1	6565
ENSRNOG00000018978	5.71654	0.914756	14.5851	1.13e-08	6.36e-07	9.79936	Cd163l1	1	CD163 molecule-like 1	ENSG00000214279	SCART1	1	619207
ENSRNOG00000003388	3.71889	3.1436	14.6103	1.11e-08	6.36e-07	10.5736	Cenpf	13	centromere protein F	ENSG00000117724	CENPF	1	1063
ENSRNOG00000011680	1.8021	3.79664	14.5933	1.12e-08	6.36e-07	10.5201	Il16	1	interleukin 16	ENSG00000172349	IL16	1	3603
ENSRNOG00000029658	1.4797	8.42499	14.5907	1.13e-08	6.36e-07	10.375	Rnf213	10	ring finger protein 213	ENSG00000173821	RNF213	1	57674
ENSRNOG00000017319	-1.2404	5.89516	-14.5672	1.15e-08	6.36e-07	10.3391	Mertk	3	MER proto-oncogene, tyrosine kinase	ENSG00000153208	MERTK	1	10461
ENSRNOG00000023937	-1.37841	3.92451	-14.584	1.13e-08	6.36e-07	10.5088	Mfsd7	14	major facilitator superfamily domain containing 7	ENSG00000169026	SLC49A3	1	84179
ENSRNOG00000003815	-1.55891	6.49305	-14.6091	1.11e-08	6.36e-07	10.3611	Slc25a11	10	solute carrier family 25 member 11	ENSG00000108528	SLC25A11	1	8402
ENSRNOG00000020656	-1.78898	4.64641	-14.5831	1.13e-08	6.36e-07	10.4478	Pfkfb4	8	6-phosphofructo-2-kinase/fructose-2,6-biphosphatase 4	ENSG00000114268	PFKFB4	1	5210
ENSRNOG00000005602	-2.04441	7.27995	-14.5692	1.14e-08	6.36e-07	10.3395	Mthfd1	6	methylenetetrahydrofolate dehydrogenase, cyclohydrolase and formyltetrahydrofolate synthetase 1	ENSG00000100714	MTHFD1	1	4522
ENSRNOG00000004936	-2.09894	6.42985	-14.5713	1.14e-08	6.36e-07	10.3507	Sdc2	7	syndecan 2	ENSG00000169439	SDC2	1	6383
ENSRNOG00000007906	3.2229	1.11607	14.5539	1.16e-08	6.39e-07	10.1686	Bub1b	3	BUB1 mitotic checkpoint serine/threonine kinase B	ENSG00000156970	BUB1B	1	701
ENSRNOG00000007906	3.2229	1.11607	14.5539	1.16e-08	6.39e-07	10.1686	Bub1b	3	BUB1 mitotic checkpoint serine/threonine kinase B	ENSG00000259288	BUB1B-PAK6	0	106821730
ENSRNOG00000058446	2.20339	1.23907	14.5399	1.17e-08	6.39e-07	10.3017	Il7r	KL567908.1	interleukin 7 receptor	ENSG00000168685	IL7R	1	3575
ENSRNOG00000027204	2.18839	4.34781	14.5326	1.18e-08	6.39e-07	10.4394	Map6	1	microtubule-associated protein 6	ENSG00000171533	MAP6	1	4135
ENSRNOG00000018526	1.52168	4.87544	14.539	1.17e-08	6.39e-07	10.374	Dlg4	10	discs large MAGUK scaffold protein 4	ENSG00000132535	DLG4	1	1742
ENSRNOG00000046109	-1.45522	4.11559	-14.5485	1.16e-08	6.39e-07	10.4697	LOC689574	4	hypothetical protein LOC689574	ENSG00000243317	STMP1	1	647087
ENSRNOG00000049484	0.972212	7.26725	14.5225	1.18e-08	6.4e-07	10.2816	Atp9a	3	ATPase phospholipid transporting 9A (putative)	ENSG00000054793	ATP9A	1	10079
ENSRNOG00000022071	-1.80107	4.44266	-14.5129	1.19e-08	6.4e-07	10.4177	Itga2b	10	integrin subunit alpha 2b	ENSG00000005961	ITGA2B	1	3674
ENSRNOG00000010697	-1.80682	6.95131	-14.5168	1.19e-08	6.4e-07	10.2914	Hadh	2	hydroxyacyl-CoA dehydrogenase	ENSG00000138796	HADH	1	3033
ENSRNOG00000021579	-1.5573	5.57506	-14.4949	1.21e-08	6.46e-07	10.3082	Mpp6	4	membrane palmitoylated protein 6	ENSG00000105926	MPP6	1	51678
ENSRNOG00000007865	2.97374	3.01931	14.4747	1.23e-08	6.52e-07	10.4764	Ephb1	8	Eph receptor B1	ENSG00000154928	EPHB1	1	2047
ENSRNOG00000014312	2.71442	1.66024	14.4665	1.23e-08	6.52e-07	10.3564	Trbc2	4	T cell receptor beta, constant 2	ENSG00000211772	TRBC2	1	NA
ENSRNOG00000014312	2.71442	1.66024	14.4665	1.23e-08	6.52e-07	10.3564	Trbc2	4	T cell receptor beta, constant 2	ENSG00000211751	TRBC1	0	NA
ENSRNOG00000003567	-1.12743	5.0922	-14.4703	1.23e-08	6.52e-07	10.3091	Ppox	13	protoporphyrinogen oxidase	ENSG00000143224	PPOX	1	5498
ENSRNOG00000009084	-1.60832	3.49602	-14.4573	1.24e-08	6.54e-07	10.4473	Rpusd3	4	RNA pseudouridylate synthase domain containing 3	ENSG00000156990	RPUSD3	1	285367
ENSRNOG00000009963	1.57426	4.73271	14.4289	1.27e-08	6.63e-07	10.3023	Ctps1	5	CTP synthase 1	ENSG00000171793	CTPS1	1	1503
ENSRNOG00000008022	1.13567	4.82603	14.4298	1.27e-08	6.63e-07	10.2916	Apaf1	7	apoptotic peptidase activating factor 1	ENSG00000120868	APAF1	1	317
ENSRNOG00000018971	1.45188	4.9557	14.3649	1.33e-08	6.91e-07	10.2347	Mob3a	7	MOB kinase activator 3A	ENSG00000172081	MOB3A	1	126308
ENSRNOG00000049244	-1.21188	5.1501	-14.3636	1.33e-08	6.91e-07	10.2202	Sepsecs	14	Sep (O-phosphoserine) tRNA:Sec (selenocysteine) tRNA synthase	ENSG00000109618	SEPSECS	1	51091
ENSRNOG00000016991	-0.973457	6.11074	-14.3509	1.35e-08	6.95e-07	10.1565	Arl2bp	19	ADP-ribosylation factor like GTPase 2 binding protein	ENSG00000102931	ARL2BP	1	23568
ENSRNOG00000011361	-1.83554	6.76744	-14.3458	1.35e-08	6.95e-07	10.1583	Slc37a4	8	solute carrier family 37 member 4	ENSG00000137700	SLC37A4	1	2542
ENSRNOG00000018371	3.30747	3.28397	14.3148	1.38e-08	6.97e-07	10.3576	Tubb6	18	tubulin, beta 6 class V	ENSG00000176014	TUBB6	1	84617
ENSRNOG00000018434	2.34058	6.30211	14.3179	1.38e-08	6.97e-07	10.141	Stab1	16	stabilin 1	ENSG00000010327	STAB1	1	23166
ENSRNOG00000020205	1.14611	8.8034	14.3333	1.36e-08	6.97e-07	10.1878	Agrn	5	agrin	ENSG00000188157	AGRN	1	375790
ENSRNOG00000011949	-1.29752	4.14612	-14.3152	1.38e-08	6.97e-07	10.2794	Ndufb5	2	NADH:ubiquinone oxidoreductase subunit B5	ENSG00000136521	NDUFB5	1	4711
ENSRNOG00000045677	-3.41873	5.23384	-14.3249	1.37e-08	6.97e-07	10.2598	Nlrp6	1	NLR family, pyrin domain containing 6	ENSG00000174885	NLRP6	1	171389
ENSRNOG00000037446	-2.04303	3.66476	-14.3069	1.39e-08	6.99e-07	10.3248	Pxmp2	12	peroxisomal membrane protein 2	ENSG00000176894	PXMP2	1	5827
ENSRNOG00000001707	3.2918	1.74349	14.2236	1.48e-08	7.19e-07	10.1327	Vwa5b2	11	von Willebrand factor A domain containing 5B2	ENSG00000145198	VWA5B2	1	90113
ENSRNOG00000014776	2.63481	4.19144	14.2531	1.45e-08	7.19e-07	10.2482	Adcy7	19	adenylate cyclase 7	ENSG00000121281	ADCY7	1	113
ENSRNOG00000022863	2.532	1.79798	14.2455	1.46e-08	7.19e-07	10.2117	Lingo4	2	leucine rich repeat and Ig domain containing 4	ENSG00000213171	LINGO4	1	339398
ENSRNOG00000020580	2.22399	4.87743	14.1872	1.52e-08	7.19e-07	10.1131	LOC500956	8	hypothetical protein LOC500956	ENSG00000130813	SHFL	1	55337
ENSRNOG00000015279	2.18187	2.9409	14.2271	1.48e-08	7.19e-07	10.2928	Vtcn1	2	V-set domain containing T cell activation inhibitor 1	ENSG00000134258	VTCN1	1	79679
ENSRNOG00000016281	1.67572	10.4727	14.2407	1.46e-08	7.19e-07	10.183	Col4a1	16	collagen type IV alpha 1 chain	ENSG00000187498	COL4A1	1	1282
ENSRNOG00000061216	1.61539	7.23145	14.1875	1.52e-08	7.19e-07	10.0196	Tubb5	20	tubulin, beta 5 class I	ENSG00000196230	TUBB	1	203068
ENSRNOG00000018364	0.793738	6.18856	14.2003	1.51e-08	7.19e-07	10.022	Kat2a	10	lysine acetyltransferase 2A	ENSG00000108773	KAT2A	1	2648
ENSRNOG00000001009	-0.834859	6.45518	-14.1972	1.51e-08	7.19e-07	10.0251	Bri3	12	brain protein I3	ENSG00000164713	BRI3	1	25798
ENSRNOG00000000438	-1.30172	5.87786	-14.2431	1.46e-08	7.19e-07	10.085	Rnf5	20	ring finger protein 5	ENSG00000204308	RNF5	1	6048
ENSRNOG00000052873	-1.48904	6.84601	-14.2121	1.49e-08	7.19e-07	10.0461	Npnt	2	nephronectin	ENSG00000168743	NPNT	1	255743
ENSRNOG00000011714	-1.90356	4.46586	-14.2082	1.5e-08	7.19e-07	10.1778	Sat2	10	spermidine/spermine N1-acetyltransferase family member 2	ENSG00000141504	SAT2	1	112483
ENSRNOG00000017434	-2.11519	6.06444	-14.2007	1.51e-08	7.19e-07	10.0703	Mgat3	7	mannosyl (beta-1,4-)-glycoprotein beta-1,4-N-acetylglucosaminyltransferase	ENSG00000128268	MGAT3	1	4248
ENSRNOG00000015654	-2.25177	6.08835	-14.2179	1.49e-08	7.19e-07	10.0845	Ghr	2	growth hormone receptor	ENSG00000112964	GHR	1	2690
ENSRNOG00000017133	-2.33777	8.08685	-14.2208	1.48e-08	7.19e-07	10.0877	LOC306766	17	hypothetical LOC306766	ENSG00000122203	KIAA1191	1	57179
ENSRNOG00000034084	-2.59408	5.5565	-14.2071	1.5e-08	7.19e-07	10.1118	Ggct	4	gamma-glutamyl cyclotransferase	ENSG00000006625	GGCT	1	79017
ENSRNOG00000034084	-2.59408	5.5565	-14.2071	1.5e-08	7.19e-07	10.1118	Ggct	4	gamma-glutamyl cyclotransferase	ENSG00000281039	AC005154.5	0	NA
ENSRNOG00000006893	-3.34113	5.92171	-14.1862	1.52e-08	7.19e-07	10.1014	Ppm1k	4	protein phosphatase, Mg2+/Mn2+ dependent, 1K	ENSG00000163644	PPM1K	1	152926
ENSRNOG00000002946	3.88556	3.71658	14.1641	1.55e-08	7.21e-07	10.2393	Socs3	10	suppressor of cytokine signaling 3	ENSG00000184557	SOCS3	1	9021
ENSRNOG00000051235	2.83386	4.32051	14.1688	1.54e-08	7.21e-07	10.179	C2	20	complement C2	ENSG00000166278	C2	1	717
ENSRNOG00000001167	2.54983	1.10838	14.1754	1.54e-08	7.21e-07	10.0619	Ubash3a	20	ubiquitin associated and SH3 domain containing, A	ENSG00000160185	UBASH3A	1	53347
ENSRNOG00000016812	1.4654	5.71316	14.1711	1.54e-08	7.21e-07	10.02	Adamts16	1	ADAM metallopeptidase with thrombospondin type 1 motif, 16	ENSG00000145536	ADAMTS16	1	170690
ENSRNOG00000017456	4.30313	1.18183	14.152	1.56e-08	7.23e-07	9.85607	Vstm2b	1	V-set and transmembrane domain containing 2B	ENSG00000187135	VSTM2B	1	342865
ENSRNOG00000019080	1.0781	4.2728	14.1529	1.56e-08	7.23e-07	10.1281	Hsd3b7	1	hydroxy-delta-5-steroid dehydrogenase, 3 beta- and steroid delta-isomerase 7	ENSG00000099377	HSD3B7	1	80270
ENSRNOG00000013578	3.81855	0.784052	14.1279	1.59e-08	7.32e-07	9.69586	Trem2	9	triggering receptor expressed on myeloid cells 2	ENSG00000095970	TREM2	1	54209
ENSRNOG00000015077	-1.21887	6.17536	-14.1268	1.59e-08	7.32e-07	9.98192	Acsf3	19	acyl-CoA synthetase family member 3	ENSG00000176715	ACSF3	1	197322
ENSRNOG00000020030	4.38823	2.54011	14.0857	1.64e-08	7.5e-07	10.1057	Crlf1	16	cytokine receptor-like factor 1	ENSG00000006016	CRLF1	1	9244
ENSRNOG00000008117	-2.54007	6.99251	-14.0875	1.64e-08	7.5e-07	9.96811	Galnt11	4	polypeptide N-acetylgalactosaminyltransferase 11	ENSG00000178234	GALNT11	1	63917
ENSRNOG00000019494	1.64235	4.12362	14.0714	1.66e-08	7.53e-07	10.0852	Psmb10	19	proteasome subunit beta 10	ENSG00000205220	PSMB10	1	5699
ENSRNOG00000020922	-1.37163	3.68852	-14.075	1.66e-08	7.53e-07	10.136	Hspb6	1	heat shock protein family B (small) member 6	ENSG00000004776	HSPB6	1	126393
ENSRNOG00000008471	2.44499	4.49797	14.0602	1.68e-08	7.54e-07	10.054	Kif21b	13	kinesin family member 21B	ENSG00000116852	KIF21B	1	23046
ENSRNOG00000026842	-1.49889	8.07465	-14.0611	1.68e-08	7.54e-07	9.95242	Nnt	2	nicotinamide nucleotide transhydrogenase	ENSG00000112992	NNT	1	23530
ENSRNOG00000020202	-2.47214	6.25572	-14.0507	1.69e-08	7.57e-07	9.94968	Asrgl1	1	asparaginase like 1	ENSG00000162174	ASRGL1	1	80150
ENSRNOG00000007329	1.11653	5.84202	14.0384	1.7e-08	7.59e-07	9.90599	Frmd6	6	FERM domain containing 6	ENSG00000139926	FRMD6	1	122786
ENSRNOG00000024577	-2.38366	5.09487	-14.0421	1.7e-08	7.59e-07	10.0074	Gamt	7	guanidinoacetate N-methyltransferase	ENSG00000130005	GAMT	1	2593
ENSRNOG00000020308	-1.57827	6.62663	-14.0283	1.72e-08	7.62e-07	9.9023	Ech1	1	enoyl-CoA hydratase 1	ENSG00000104823	ECH1	1	1891
ENSRNOG00000043329	2.012	2.19042	13.9952	1.76e-08	7.79e-07	10.1003	Rnf180	2	ring finger protein 180	ENSG00000164197	RNF180	1	285671
ENSRNOG00000010362	1.62714	7.18019	13.9835	1.78e-08	7.84e-07	9.85472	Anxa2	8	annexin A2	ENSG00000182718	ANXA2	1	302
ENSRNOG00000010575	1.86484	2.96397	13.9578	1.81e-08	7.87e-07	10.0855	Dapp1	2	dual adaptor of phosphotyrosine and 3-phosphoinositides 1	ENSG00000070190	DAPP1	1	27071
ENSRNOG00000017930	1.39084	4.49897	13.9587	1.81e-08	7.87e-07	9.95308	Lpcat1	1	lysophosphatidylcholine acyltransferase 1	ENSG00000153395	LPCAT1	1	79888
ENSRNOG00000013895	1.11629	6.49856	13.9666	1.8e-08	7.87e-07	9.83191	Npdc1	3	neural proliferation, differentiation and control, 1	ENSG00000107281	NPDC1	1	56654
ENSRNOG00000052415	-1.66234	5.5067	-13.9541	1.82e-08	7.87e-07	9.88093	Gstt2	20	glutathione S-transferase, theta 2	ENSG00000133433	GSTT2B	1	653689
ENSRNOG00000052415	-1.66234	5.5067	-13.9541	1.82e-08	7.87e-07	9.88093	Gstt2	20	glutathione S-transferase, theta 2	ENSG00000099984	GSTT2	1	2953
ENSRNOG00000019616	-1.85073	7.16691	-13.9549	1.82e-08	7.87e-07	9.84796	Prss8	1	protease, serine, 8	ENSG00000052344	PRSS8	1	5652
ENSRNOG00000018131	-3.98903	4.73175	-13.9523	1.82e-08	7.87e-07	10.0367	Slc16a4	2	solute carrier family 16, member 4	ENSG00000168679	SLC16A4	1	9122
ENSRNOG00000000457	1.47402	5.31922	13.935	1.84e-08	7.91e-07	9.85634	Tap1	20	transporter 1, ATP binding cassette subfamily B member	ENSG00000168394	TAP1	1	6890
ENSRNOG00000003847	-0.905229	6.48804	-13.933	1.85e-08	7.91e-07	9.81313	Gid4	10	GID complex subunit 4	ENSG00000141034	GID4	1	79018
ENSRNOG00000018765	-1.56787	4.45959	-13.9375	1.84e-08	7.91e-07	9.96293	Pold4	1	DNA polymerase delta 4, accessory subunit	ENSG00000256514	AP003419.1	1	NA
ENSRNOG00000018765	-1.56787	4.45959	-13.9375	1.84e-08	7.91e-07	9.96293	Pold4	1	DNA polymerase delta 4, accessory subunit	ENSG00000175482	POLD4	1	57804
ENSRNOG00000011913	2.20841	7.22948	13.9218	1.86e-08	7.95e-07	9.81215	Cp	2	ceruloplasmin	ENSG00000047457	CP	1	1356
ENSRNOG00000006030	3.77575	3.15284	13.9122	1.88e-08	7.98e-07	10.055	Ptprz1	4	protein tyrosine phosphatase, receptor type Z1	ENSG00000106278	PTPRZ1	1	5803
ENSRNOG00000017020	1.4256	5.33618	13.9092	1.88e-08	7.98e-07	9.83888	Inpp5d	9	inositol polyphosphate-5-phosphatase D	ENSG00000168918	INPP5D	1	3635
ENSRNOG00000023588	-3.41435	6.61859	-13.9012	1.89e-08	8e-07	9.84727	Dmgdh	2	dimethylglycine dehydrogenase	ENSG00000132837	DMGDH	1	29958
ENSRNOG00000020970	2.70551	3.07609	13.8642	1.95e-08	8.1e-07	10.0157	Rundc3a	10	RUN domain containing 3A	ENSG00000108309	RUNDC3A	1	10900
ENSRNOG00000009204	2.07127	2.74013	13.8218	2.01e-08	8.1e-07	9.98468	Il17re	4	interleukin 17 receptor E	ENSG00000163701	IL17RE	1	132014
ENSRNOG00000050223	1.73894	4.26926	13.8509	1.97e-08	8.1e-07	9.90141	Rin1	1	Ras and Rab interactor 1	ENSG00000174791	RIN1	1	9610
ENSRNOG00000013177	1.64786	7.14361	13.8401	1.98e-08	8.1e-07	9.73926	LOC100912399	2	mitogen-activated protein kinase kinase kinase 1-like	ENSG00000095015	MAP3K1	1	4214
ENSRNOG00000010237	1.46184	7.40988	13.842	1.98e-08	8.1e-07	9.7433	Map7d1	5	MAP7 domain containing 1	ENSG00000116871	MAP7D1	1	55700
ENSRNOG00000031312	1.26917	6.50574	13.8466	1.97e-08	8.1e-07	9.73613	Tnfrsf1a	4	TNF receptor superfamily member 1A	ENSG00000067182	TNFRSF1A	1	7132
ENSRNOG00000007604	1.10006	4.66176	13.8439	1.98e-08	8.1e-07	9.84121	Igsf8	13	immunoglobulin superfamily, member 8	ENSG00000162729	IGSF8	1	93185
ENSRNOG00000018986	1.01357	6.389	13.823	2.01e-08	8.1e-07	9.71491	Fbxl19	1	F-box and leucine-rich repeat protein 19	ENSG00000099364	FBXL19	1	54620
ENSRNOG00000020744	1.01087	6.75326	13.844	1.98e-08	8.1e-07	9.7318	Adar	2	adenosine deaminase, RNA-specific	ENSG00000160710	ADAR	1	103
ENSRNOG00000014522	-1.4788	6.76433	-13.8297	2e-08	8.1e-07	9.73737	Mlycd	19	malonyl-CoA decarboxylase	ENSG00000103150	MLYCD	1	23417
ENSRNOG00000005248	-1.50269	4.19373	-13.8811	1.92e-08	8.1e-07	9.94965	Slc1a4	14	solute carrier family 1 member 4	ENSG00000115902	SLC1A4	1	6509
ENSRNOG00000007088	-1.5092	6.36354	-13.8383	1.99e-08	8.1e-07	9.75173	Xpot	7	exportin for tRNA	ENSG00000184575	XPOT	1	11260
ENSRNOG00000043201	-1.91111	5.65355	-13.8366	1.99e-08	8.1e-07	9.78635	Coq8a	13	coenzyme Q8A	ENSG00000163050	COQ8A	1	56997
ENSRNOG00000014743	-2.33154	6.7629	-13.8454	1.98e-08	8.1e-07	9.76931	Hagh	10	hydroxyacyl glutathione hydrolase	ENSG00000063854	HAGH	1	3029
ENSRNOG00000042950	-2.66778	4.40531	-13.8591	1.96e-08	8.1e-07	9.9397	Slc5a9	5	solute carrier family 5 member 9	ENSG00000117834	SLC5A9	1	200010
ENSRNOG00000054142	-4.40131	2.75887	-13.8303	2e-08	8.1e-07	9.93968	Slc30a2	5	solute carrier family 30 member 2	ENSG00000158014	SLC30A2	1	7780
ENSRNOG00000039496	1.33154	4.74788	13.812	2.03e-08	8.14e-07	9.80783	Plp2	X	proteolipid protein 2	ENSG00000102007	PLP2	1	5355
ENSRNOG00000015520	3.38259	0.681325	13.7887	2.07e-08	8.21e-07	9.53956	Ticrr	1	TOPBP1-interacting checkpoint and replication regulator	ENSG00000140534	TICRR	1	90381
ENSRNOG00000000704	1.81621	4.2189	13.7938	2.06e-08	8.21e-07	9.86294	Cmklr1	12	chemerin chemokine-like receptor 1	ENSG00000174600	CMKLR1	1	1240
ENSRNOG00000014285	0.865228	6.8986	13.789	2.07e-08	8.21e-07	9.6874	Ssh2	10	slingshot protein phosphatase 2	ENSG00000141298	SSH2	1	85464
ENSRNOG00000013294	2.67247	0.879238	13.7758	2.09e-08	8.27e-07	9.65488	Sh2d2a	2	SH2 domain containing 2A	ENSG00000027869	SH2D2A	1	9047
ENSRNOG00000023400	1.68695	5.15339	13.7558	2.12e-08	8.32e-07	9.73102	Dtx3l	11	deltex E3 ubiquitin ligase 3L	ENSG00000163840	DTX3L	1	151636
ENSRNOG00000050445	-1.52487	6.278	-13.756	2.12e-08	8.32e-07	9.6859	Gde1	1	glycerophosphodiester phosphodiesterase 1	ENSG00000006007	GDE1	1	51573
ENSRNOG00000001239	-1.53461	6.21352	-13.7565	2.12e-08	8.32e-07	9.68747	Ddt	20	D-dopachrome tautomerase	ENSG00000099974	DDTL	1	100037417
ENSRNOG00000001239	-1.53461	6.21352	-13.7565	2.12e-08	8.32e-07	9.68747	Ddt	20	D-dopachrome tautomerase	ENSG00000099977	DDT	1	1652
ENSRNOG00000001239	-1.53461	6.21352	-13.7565	2.12e-08	8.32e-07	9.68747	Ddt	20	D-dopachrome tautomerase	ENSG00000099977	DDT	1	100037417
ENSRNOG00000001239	-1.53461	6.21352	-13.7565	2.12e-08	8.32e-07	9.68747	Ddt	20	D-dopachrome tautomerase	ENSG00000285762	AC253536.7	1	NA
ENSRNOG00000013922	1.5106	2.98684	13.7441	2.14e-08	8.34e-07	9.91507	Dok2	15	docking protein 2	ENSG00000147443	DOK2	1	9046
ENSRNOG00000012440	-2.54866	5.23393	-13.7424	2.14e-08	8.34e-07	9.7591	Msra	15	methionine sulfoxide reductase A	ENSG00000175806	MSRA	1	4482
ENSRNOG00000016543	-3.0631	1.76492	-13.7433	2.14e-08	8.34e-07	9.77409	Trim63	5	tripartite motif containing 63	ENSG00000158022	TRIM63	1	84676
ENSRNOG00000024008	1.38522	2.53428	13.7338	2.16e-08	8.37e-07	9.91759	Cdc25c	18	cell division cycle 25C	ENSG00000158402	CDC25C	1	995
ENSRNOG00000018251	2.62272	3.72411	13.7136	2.19e-08	8.47e-07	9.86739	Mrc1	17	mannose receptor, C type 1	ENSG00000260314	MRC1	1	4360
ENSRNOG00000057760	2.53442	0.603663	13.6811	2.25e-08	8.47e-07	9.49486	Stil	5	Scl/Tal1 interrupting locus	ENSG00000123473	STIL	1	6491
ENSRNOG00000016148	2.39919	1.69749	13.6965	2.22e-08	8.47e-07	9.78496	Gtse1	7	G-2 and S-phase expressed 1	ENSG00000075218	GTSE1	1	51512
ENSRNOG00000012331	1.43033	3.91019	13.6773	2.25e-08	8.47e-07	9.78622	Casp8	9	caspase 8	ENSG00000064012	CASP8	1	841
ENSRNOG00000016071	1.40979	5.83823	13.7019	2.21e-08	8.47e-07	9.63661	P3h3	4	prolyl 3-hydroxylase 3	ENSG00000110811	P3H3	1	10536
ENSRNOG00000020588	1.33439	3.35984	13.677	2.25e-08	8.47e-07	9.83463	Efna4	2	ephrin A4	ENSG00000243364	EFNA4	1	1945
ENSRNOG00000028703	1.23295	4.11067	13.674	2.26e-08	8.47e-07	9.7689	Slc39a6	18	solute carrier family 39 member 6	ENSG00000141424	SLC39A6	1	25800
ENSRNOG00000026742	-0.789995	5.78775	-13.6788	2.25e-08	8.47e-07	9.62535	Ypel5	6	yippee-like 5	ENSG00000119801	YPEL5	1	51646
ENSRNOG00000019232	-1.0445	6.14686	-13.6712	2.26e-08	8.47e-07	9.60854	RGD1311345	17	similar to CG9752-PA	ENSG00000165118	C9orf64	1	84267
ENSRNOG00000011068	-1.06682	6.19285	-13.6994	2.21e-08	8.47e-07	9.62967	Papss2	1	3'-phosphoadenosine 5'-phosphosulfate synthase 2	ENSG00000198682	PAPSS2	1	9060
ENSRNOG00000022967	-1.56127	5.19762	-13.7113	2.19e-08	8.47e-07	9.70714	Slc35d1	5	solute carrier family 35 member D1	ENSG00000116704	SLC35D1	1	23169
ENSRNOG00000047708	-2.31857	5.28387	-13.6824	2.24e-08	8.47e-07	9.69899	Gstz1	6	glutathione S-transferase zeta 1	ENSG00000100577	GSTZ1	1	2954
ENSRNOG00000018570	-3.25313	3.8607	-13.6913	2.23e-08	8.47e-07	9.86414	C1qtnf3	2	C1q and tumor necrosis factor related protein 3	ENSG00000082196	C1QTNF3	1	114899
ENSRNOG00000018570	-3.25313	3.8607	-13.6913	2.23e-08	8.47e-07	9.86414	C1qtnf3	2	C1q and tumor necrosis factor related protein 3	ENSG00000273294	C1QTNF3-AMACR	1	NA
ENSRNOG00000013069	2.50995	1.19208	13.6438	2.31e-08	8.54e-07	9.60978	Sapcd2	3	suppressor APC domain containing 2	ENSG00000186193	SAPCD2	1	89958
ENSRNOG00000033608	2.31247	5.12113	13.6393	2.32e-08	8.54e-07	9.65436	Cd276	8	Cd276 molecule	ENSG00000103855	CD276	1	80381
ENSRNOG00000036829	1.68859	4.38357	13.6307	2.34e-08	8.54e-07	9.70157	Nckap1l	7	NCK associated protein 1 like	ENSG00000123338	NCKAP1L	1	3071
ENSRNOG00000002950	1.51795	2.72632	13.635	2.33e-08	8.54e-07	9.84157	Lyl1	19	LYL1, basic helix-loop-helix family member	ENSG00000104903	LYL1	1	4066
ENSRNOG00000002194	-0.986581	5.52828	-13.6279	2.34e-08	8.54e-07	9.60154	Coq2	14	coenzyme Q2, polyprenyltransferase	ENSG00000173085	COQ2	1	27235
ENSRNOG00000007744	-1.11844	5.83913	-13.6413	2.32e-08	8.54e-07	9.59731	Ehd3	6	EH-domain containing 3	ENSG00000013016	EHD3	1	30845
ENSRNOG00000014816	-1.59028	7.04581	-13.6393	2.32e-08	8.54e-07	9.58352	Slc1a1	1	solute carrier family 1 member 1	ENSG00000106688	SLC1A1	1	6505
ENSRNOG00000061100	-1.79139	6.81707	-13.6525	2.3e-08	8.54e-07	9.59745	Tmem150a	4	transmembrane protein 150A	ENSG00000168890	TMEM150A	1	129303
ENSRNOG00000020420	-2.4829	6.19721	-13.6325	2.33e-08	8.54e-07	9.6166	Pklr	2	pyruvate kinase, liver and RBC	ENSG00000143627	PKLR	1	5313
ENSRNOG00000023781	1.64985	10.8121	13.6172	2.36e-08	8.55e-07	9.69906	Plec	7	plectin	ENSG00000178209	PLEC	1	5339
ENSRNOG00000012830	1.3538	2.92206	13.616	2.36e-08	8.55e-07	9.81804	Paqr8	9	progestin and adipoQ receptor family member 8	ENSG00000170915	PAQR8	1	85315
ENSRNOG00000010156	-1.01676	4.01493	-13.6161	2.36e-08	8.55e-07	9.72944	Snapc5	8	small nuclear RNA activating complex, polypeptide 5	ENSG00000174446	SNAPC5	1	10302
ENSRNOG00000019604	1.40679	5.34426	13.6043	2.39e-08	8.57e-07	9.58542	Pld2	10	phospholipase D2	ENSG00000129219	PLD2	1	5338
ENSRNOG00000006227	0.936892	4.54447	13.6026	2.39e-08	8.57e-07	9.65147	Ifih1	3	interferon induced with helicase C domain 1	ENSG00000115267	IFIH1	1	64135
ENSRNOG00000008971	-2.50683	4.02717	-13.6088	2.38e-08	8.57e-07	9.7702	Hnf4g	2	hepatocyte nuclear factor 4, gamma	ENSG00000164749	HNF4G	1	3174
ENSRNOG00000057557	-3.35457	5.43337	-13.5936	2.41e-08	8.61e-07	9.66078	Prlr	2	prolactin receptor	ENSG00000113494	PRLR	1	5618
ENSRNOG00000002418	2.52175	4.05643	13.5773	2.44e-08	8.7e-07	9.7171	Tgfb2	13	transforming growth factor, beta 2	ENSG00000092969	TGFB2	1	7042
ENSRNOG00000017003	1.05007	7.51886	13.571	2.45e-08	8.7e-07	9.52204	Plxna1	4	plexin A1	ENSG00000114554	PLXNA1	1	5361
ENSRNOG00000004402	-1.37882	6.34187	-13.5716	2.45e-08	8.7e-07	9.53005	Lpgat1	13	lysophosphatidylglycerol acyltransferase 1	ENSG00000123684	LPGAT1	1	9926
ENSRNOG00000002115	-1.9176	7.54271	-13.5372	2.51e-08	8.91e-07	9.51093	Sod1	11	superoxide dismutase 1, soluble	ENSG00000142168	SOD1	1	6647
ENSRNOG00000033984	2.02912	3.62566	13.522	2.54e-08	8.99e-07	9.7137	Ifnlr1	5	interferon, lambda receptor 1	ENSG00000185436	IFNLR1	1	163702
ENSRNOG00000025383	-1.38286	8.10967	-13.5028	2.58e-08	9.1e-07	9.4977	Pdha1	X	pyruvate dehydrogenase (lipoamide) alpha 1	ENSG00000131828	PDHA1	1	5160
ENSRNOG00000011774	2.37924	4.805	13.4988	2.59e-08	9.11e-07	9.58667	Fblim1	5	filamin binding LIM protein 1	ENSG00000162458	FBLIM1	1	54751
ENSRNOG00000046639	1.74792	3.05845	13.492	2.61e-08	9.11e-07	9.71636	Itgae	10	integrin subunit alpha E	ENSG00000083457	ITGAE	1	3682
ENSRNOG00000004813	-1.04347	6.31748	-13.4945	2.6e-08	9.11e-07	9.45761	Rtcb	7	RNA 2',3'-cyclic phosphate and 5'-OH ligase	ENSG00000100220	RTCB	1	51493
ENSRNOG00000005101	-1.0839	6.68473	-13.487	2.62e-08	9.12e-07	9.44774	Mia2	6	melanoma inhibitory activity 2	ENSG00000271321	CTAGE6	1	340307
ENSRNOG00000005101	-1.0839	6.68473	-13.487	2.62e-08	9.12e-07	9.44774	Mia2	6	melanoma inhibitory activity 2	ENSG00000225932	CTAGE4	1	100128553
ENSRNOG00000005101	-1.0839	6.68473	-13.487	2.62e-08	9.12e-07	9.44774	Mia2	6	melanoma inhibitory activity 2	ENSG00000271079	CTAGE15	1	441294
ENSRNOG00000005101	-1.0839	6.68473	-13.487	2.62e-08	9.12e-07	9.44774	Mia2	6	melanoma inhibitory activity 2	ENSG00000212710	CTAGE1	1	64693
ENSRNOG00000005101	-1.0839	6.68473	-13.487	2.62e-08	9.12e-07	9.44774	Mia2	6	melanoma inhibitory activity 2	ENSG00000236761	CTAGE9	1	643854
ENSRNOG00000005101	-1.0839	6.68473	-13.487	2.62e-08	9.12e-07	9.44774	Mia2	6	melanoma inhibitory activity 2	ENSG00000150527	MIA2	0	4253
ENSRNOG00000005101	-1.0839	6.68473	-13.487	2.62e-08	9.12e-07	9.44774	Mia2	6	melanoma inhibitory activity 2	ENSG00000244693	CTAGE8	1	100142659
ENSRNOG00000015807	-1.74221	8.45054	-13.4721	2.65e-08	9.21e-07	9.48657	Pyroxd2	1	pyridine nucleotide-disulphide oxidoreductase domain 2	ENSG00000119943	PYROXD2	1	84795
ENSRNOG00000050794	2.12431	4.00571	13.457	2.68e-08	9.26e-07	9.61236	Pdlim4	10	PDZ and LIM domain 4	ENSG00000131435	PDLIM4	1	8572
ENSRNOG00000054561	1.49032	3.02192	13.4547	2.68e-08	9.26e-07	9.68807	Isg20	1	interferon stimulated exonuclease gene 20	ENSG00000172183	ISG20	1	3669
ENSRNOG00000001091	1.11402	7.1414	13.456	2.68e-08	9.26e-07	9.41719	Hip1r	12	huntingtin interacting protein 1 related	ENSG00000130787	HIP1R	1	9026
ENSRNOG00000005872	1.91005	2.01406	13.4491	2.7e-08	9.27e-07	9.67337	Tcf7	10	transcription factor 7 (T-cell specific, HMG-box)	ENSG00000081059	TCF7	1	6932
ENSRNOG00000016244	1.64791	5.41848	13.4475	2.7e-08	9.27e-07	9.45865	Mical2	1	microtubule associated monooxygenase, calponin and LIM domain containing 2	ENSG00000133816	MICAL2	1	9645
ENSRNOG00000019283	1.58147	3.89279	13.4289	2.74e-08	9.36e-07	9.59672	P2ry2	1	purinergic receptor P2Y2	ENSG00000175591	P2RY2	1	5029
ENSRNOG00000004307	1.56257	3.98096	13.4212	2.76e-08	9.36e-07	9.58191	Tor3a	13	torsin family 3, member A	ENSG00000186283	TOR3A	1	64222
ENSRNOG00000002347	-1.22454	7.68094	-13.4224	2.75e-08	9.36e-07	9.40937	Rgl1	13	ral guanine nucleotide dissociation stimulator,-like 1	ENSG00000143344	RGL1	1	23179
ENSRNOG00000049641	-1.25198	6.51688	-13.4246	2.75e-08	9.36e-07	9.39953	Rab29	13	RAB29, member RAS oncogene family	ENSG00000117280	RAB29	1	8934
ENSRNOG00000022576	-1.96117	5.03858	-13.4192	2.76e-08	9.36e-07	9.49114	Nudt12	9	nudix hydrolase 12	ENSG00000112874	NUDT12	1	83594
ENSRNOG00000008345	-0.828188	7.19019	-13.414	2.77e-08	9.37e-07	9.38801	Clcn6	5	chloride voltage-gated channel 6	ENSG00000011021	CLCN6	1	1185
ENSRNOG00000004127	1.17626	5.63483	13.3949	2.81e-08	9.49e-07	9.39193	AABR07021840.1	13		ENSG00000143702	CEP170	1	9859
ENSRNOG00000004127	1.17626	5.63483	13.3949	2.81e-08	9.49e-07	9.39193	AABR07021840.1	13		ENSG00000143702	CEP170	1	645455
ENSRNOG00000019861	-0.909804	6.44516	-13.3858	2.84e-08	9.53e-07	9.3617	Tollip	1	toll interacting protein	ENSG00000078902	TOLLIP	1	54472
ENSRNOG00000025895	-1.38096	5.22833	-13.3816	2.84e-08	9.54e-07	9.4264	Sdpr	9	serum deprivation response	ENSG00000168497	CAVIN2	1	8436
ENSRNOG00000053469	1.42838	5.11062	13.3716	2.87e-08	9.55e-07	9.40958	Tmc6	10	transmembrane channel-like gene family 6	ENSG00000141524	TMC6	1	11322
ENSRNOG00000010214	-1.4608	5.02957	-13.3743	2.86e-08	9.55e-07	9.44145	Scrn2	10	secernin 2	ENSG00000141295	SCRN2	1	90507
ENSRNOG00000012073	-1.76424	6.87342	-13.3734	2.86e-08	9.55e-07	9.36397	Abhd14b	8	abhydrolase domain containing 14b	ENSG00000114779	ABHD14B	1	84836
ENSRNOG00000025350	1.67924	5.16756	13.3673	2.88e-08	9.56e-07	9.4053	Ppp1r13l	1	protein phosphatase 1, regulatory subunit 13 like	ENSG00000104881	PPP1R13L	1	10848
ENSRNOG00000018781	1.21093	5.71763	13.3604	2.89e-08	9.58e-07	9.35772	Map1s	16	microtubule-associated protein 1S	ENSG00000130479	MAP1S	1	55201
ENSRNOG00000010890	1.69218	6.43709	13.3506	2.92e-08	9.64e-07	9.33031	Bmp1	15	bone morphogenetic protein 1	ENSG00000168487	BMP1	1	649
ENSRNOG00000060550	0.850897	6.12341	13.3441	2.93e-08	9.66e-07	9.32105	Epn2	10	epsin 2	ENSG00000072134	EPN2	1	22905
ENSRNOG00000050224	1.69133	2.72394	13.3372	2.95e-08	9.67e-07	9.60519	Stambpl1	1	STAM binding protein-like 1	ENSG00000138134	STAMBPL1	1	57559
ENSRNOG00000013387	1.45051	4.83295	13.3395	2.94e-08	9.67e-07	9.40524	Tpcn2	1	two pore segment channel 2	ENSG00000287725	AP003071.5	0	NA
ENSRNOG00000013387	1.45051	4.83295	13.3395	2.94e-08	9.67e-07	9.40524	Tpcn2	1	two pore segment channel 2	ENSG00000162341	TPCN2	1	219931
ENSRNOG00000055371	2.56187	3.8294	13.3218	2.98e-08	9.7e-07	9.53736	Sptbn4	1	spectrin, beta, non-erythrocytic 4	ENSG00000160460	SPTBN4	1	57731
ENSRNOG00000024886	0.790693	6.36191	13.3175	2.99e-08	9.7e-07	9.29405	Ext1	7	exostosin glycosyltransferase 1	ENSG00000182197	EXT1	1	2131
ENSRNOG00000001232	-1.14177	6.73167	-13.3249	2.98e-08	9.7e-07	9.31226	Slc19a1	20	solute carrier family 19 member 1	ENSG00000173638	SLC19A1	1	6573
ENSRNOG00000017820	-2.29698	3.92007	-13.3234	2.98e-08	9.7e-07	9.53235	Nqo2	17	NAD(P)H quinone dehydrogenase 2	ENSG00000124588	NQO2	1	4835
ENSRNOG00000007951	-3.16906	4.15479	-13.3173	2.99e-08	9.7e-07	9.53609	Galnt14	6	polypeptide N-acetylgalactosaminyltransferase 14	ENSG00000158089	GALNT14	1	79623
ENSRNOG00000022505	2.53712	3.64223	13.3048	3.02e-08	9.72e-07	9.52298	Slc17a4	17	solute carrier family 17, member 4	ENSG00000146039	SLC17A4	1	10050
ENSRNOG00000004201	1.84448	4.2218	13.3014	3.03e-08	9.72e-07	9.45248	Rims2	7	regulating synaptic membrane exocytosis 2	ENSG00000176406	RIMS2	1	9699
ENSRNOG00000001470	1.2723	4.27705	13.3036	3.03e-08	9.72e-07	9.43627	Limk1	12	LIM domain kinase 1	ENSG00000106683	LIMK1	1	3984
ENSRNOG00000008061	1.12191	6.10283	13.3003	3.04e-08	9.72e-07	9.28728	Nuak1	7	NUAK family kinase 1	ENSG00000074590	NUAK1	1	9891
ENSRNOG00000039596	-1.72241	4.3709	-13.3009	3.03e-08	9.72e-07	9.44608	Prob1	18	proline rich basic protein 1	ENSG00000228672	PROB1	1	389333
ENSRNOG00000022636	1.80042	4.73197	13.2902	3.06e-08	9.73e-07	9.38987	Alpk1	2	alpha-kinase 1	ENSG00000073331	ALPK1	1	80216
ENSRNOG00000056772	1.57497	3.89091	13.2953	3.05e-08	9.73e-07	9.48735	Col4a6	X	collagen type IV alpha 6 chain	ENSG00000197565	COL4A6	1	1288
ENSRNOG00000028879	1.55452	4.06472	13.2866	3.07e-08	9.73e-07	9.44275	Slc4a8	7	solute carrier family 4 member 8	ENSG00000050438	SLC4A8	1	9498
ENSRNOG00000012748	-1.08871	5.05473	-13.2864	3.07e-08	9.73e-07	9.35349	Vamp8	4	vesicle-associated membrane protein 8	ENSG00000118640	VAMP8	1	8673
ENSRNOG00000033059	2.1868	3.22295	13.2752	3.1e-08	9.78e-07	9.53831	Galnt6	7	polypeptide N-acetylgalactosaminyltransferase 6	ENSG00000139629	GALNT6	1	11226
ENSRNOG00000014768	1.13025	7.48014	13.2767	3.09e-08	9.78e-07	9.27471	Glis3	1	GLIS family zinc finger 3	ENSG00000107249	GLIS3	1	169792
ENSRNOG00000016091	2.25025	3.29702	13.2633	3.13e-08	9.82e-07	9.52377	Tmem169	9	transmembrane protein 169	ENSG00000163449	TMEM169	1	92691
ENSRNOG00000042137	2.01365	3.55493	13.2561	3.15e-08	9.82e-07	9.49733	Tmem173	18	transmembrane protein 173	ENSG00000184584	STING1	1	340061
ENSRNOG00000005124	0.978762	5.28089	13.2563	3.14e-08	9.82e-07	9.29528	Plekhh2	6	pleckstrin homology, MyTH4 and FERM domain containing H2	ENSG00000152527	PLEKHH2	1	130271
ENSRNOG00000060753	0.931022	6.53868	13.2551	3.15e-08	9.82e-07	9.24018	Esyt1	7	extended synaptotagmin 1	ENSG00000139641	ESYT1	1	23344
ENSRNOG00000009856	-1.23959	5.50945	-13.2628	3.13e-08	9.82e-07	9.30283	Sypl1	6	synaptophysin-like 1	ENSG00000008282	SYPL1	1	6856
ENSRNOG00000050843	-1.6648	6.61907	-13.2507	3.16e-08	9.83e-07	9.25918	Mut	9	methylmalonyl CoA mutase	ENSG00000146085	MMUT	1	4594
ENSRNOG00000054890	1.62342	9.47683	13.2318	3.21e-08	9.94e-07	9.31889	Flna	X	filamin A	ENSG00000196924	FLNA	1	2316
ENSRNOG00000019573	1.34111	2.56756	13.2281	3.22e-08	9.94e-07	9.52154	Lcat	19	lecithin cholesterol acyltransferase	ENSG00000213398	LCAT	1	3931
ENSRNOG00000010482	-1.12248	5.32482	-13.2298	3.21e-08	9.94e-07	9.2846	Impa1	2	inositol monophosphatase 1	ENSG00000133731	IMPA1	1	3612
ENSRNOG00000017428	1.98653	6.80185	13.2119	3.26e-08	1e-06	9.21601	Map1b	2	microtubule-associated protein 1B	ENSG00000131711	MAP1B	1	4131
ENSRNOG00000046834	3.7022	6.01946	13.1963	3.3e-08	1.01e-06	9.27847	C3	9	complement C3	ENSG00000125730	C3	1	718
ENSRNOG00000059903	2.58938	2.89324	13.1978	3.3e-08	1.01e-06	9.49347	Thbs3	2	thrombospondin 3	ENSG00000169231	THBS3	1	7059
ENSRNOG00000060237	1.39428	3.71209	13.1739	3.36e-08	1.03e-06	9.41994	Inhbb	13	inhibin beta B subunit	ENSG00000163083	INHBB	1	3625
ENSRNOG00000009339	2.68767	2.54859	13.1609	3.4e-08	1.04e-06	9.46632	Cenpe	2	centromere protein E	ENSG00000138778	CENPE	1	1062
ENSRNOG00000021170	1.35883	4.7524	13.1516	3.42e-08	1.04e-06	9.26306	Plekho1	2	pleckstrin homology domain containing O1	ENSG00000023902	PLEKHO1	1	51177
ENSRNOG00000009687	1.29153	5.2688	13.1588	3.4e-08	1.04e-06	9.21154	Ccdc120	X	coiled-coil domain containing 120	ENSG00000147144	CCDC120	1	90060
ENSRNOG00000032150	2.43747	2.24308	13.1154	3.52e-08	1.05e-06	9.42161	Adcy2	1	adenylate cyclase 2	ENSG00000078295	ADCY2	1	108
ENSRNOG00000014797	1.10629	5.61396	13.1069	3.55e-08	1.05e-06	9.14789	Tmbim1	9	transmembrane BAX inhibitor motif containing 1	ENSG00000135926	TMBIM1	1	64114
ENSRNOG00000002991	-0.993691	4.24445	-13.1077	3.55e-08	1.05e-06	9.28288	Srr	10	serine racemase	ENSG00000167720	SRR	1	63826
ENSRNOG00000028448	-1.07779	6.85231	-13.1074	3.55e-08	1.05e-06	9.12633	Elovl1	5	ELOVL fatty acid elongase 1	ENSG00000066322	ELOVL1	1	64834
ENSRNOG00000018076	-1.18342	4.66864	-13.1129	3.53e-08	1.05e-06	9.24045	Fmo5	2	flavin containing monooxygenase 5	ENSG00000131781	FMO5	1	2330
ENSRNOG00000009570	-1.96178	2.5611	-13.1264	3.49e-08	1.05e-06	9.44003	Pdxp	7	pyridoxal phosphatase	ENSG00000241360	PDXP	1	57026
ENSRNOG00000001344	-2.0692	8.60442	-13.1407	3.45e-08	1.05e-06	9.21389	Aldh2	12	aldehyde dehydrogenase 2 family (mitochondrial)	ENSG00000111275	ALDH2	1	217
ENSRNOG00000001344	-2.0692	8.60442	-13.1407	3.45e-08	1.05e-06	9.21389	Aldh2	12	aldehyde dehydrogenase 2 family (mitochondrial)	ENSG00000257767	AC002996.1	0	NA
ENSRNOG00000016217	-2.66936	5.60112	-13.1228	3.5e-08	1.05e-06	9.22898	Gtpbp4	17	GTP binding protein 4	ENSG00000107937	GTPBP4	1	23560
ENSRNOG00000015880	-3.84061	3.65559	-13.133	3.47e-08	1.05e-06	9.44393	Dpep1	19	dipeptidase 1 (renal)	ENSG00000015413	DPEP1	1	1800
ENSRNOG00000022767	-3.92984	4.09048	-13.1337	3.47e-08	1.05e-06	9.41328	Elfn1	12	extracellular leucine-rich repeat and fibronectin type III domain containing 1	ENSG00000225968	ELFN1	1	392617
ENSRNOG00000014025	6.86785	-1.44682	13.1025	3.56e-08	1.06e-06	7.64551	Rasgrf1	8	RAS protein-specific guanine nucleotide-releasing factor 1	ENSG00000058335	RASGRF1	1	5923
ENSRNOG00000011702	4.53936	0.0700682	13.0912	3.59e-08	1.06e-06	8.76451	Foxp3	X	forkhead box P3	ENSG00000049768	FOXP3	1	50943
ENSRNOG00000019728	3.57883	3.25996	13.0751	3.64e-08	1.06e-06	9.39056	Itgad	1	integrin subunit alpha D	ENSG00000169896	ITGAM	1	3684
ENSRNOG00000030387	3.29494	4.06512	13.086	3.61e-08	1.06e-06	9.32578	Kng1	11	kininogen 1	ENSG00000113889	KNG1	1	3827
ENSRNOG00000046050	2.30899	3.53075	13.0613	3.68e-08	1.06e-06	9.33305	Dennd1c	9	DENN/MADD domain containing 1C	ENSG00000205744	DENND1C	1	79958
ENSRNOG00000017114	1.37635	4.47521	13.0801	3.63e-08	1.06e-06	9.23578	Synj2	1	synaptojanin 2	ENSG00000078269	SYNJ2	1	8871
ENSRNOG00000013774	1.30078	3.69514	13.087	3.61e-08	1.06e-06	9.32159	Lmnb1	18	lamin B1	ENSG00000113368	LMNB1	1	4001
ENSRNOG00000009195	1.25358	7.79967	13.0599	3.69e-08	1.06e-06	9.09989	Tnks1bp1	3	tankyrase 1 binding protein 1	ENSG00000149115	TNKS1BP1	1	85456
ENSRNOG00000020284	-0.917496	6.17648	-13.0826	3.62e-08	1.06e-06	9.10859	Prkar2a	8	protein kinase cAMP-dependent type 2 regulatory subunit alpha	ENSG00000114302	PRKAR2A	1	5576
ENSRNOG00000013223	-2.25255	6.59934	-13.0669	3.67e-08	1.06e-06	9.11762	Fah	1	fumarylacetoacetate hydrolase	ENSG00000103876	FAH	1	2184
ENSRNOG00000048114	-2.3438	4.78767	-13.0985	3.57e-08	1.06e-06	9.25814	Echdc3	17	enoyl CoA hydratase domain containing 3	ENSG00000134463	ECHDC3	1	79746
ENSRNOG00000037688	-2.49693	1.07571	-13.0689	3.66e-08	1.06e-06	9.16639	Ak9	20	adenylate kinase 9	ENSG00000155085	AK9	1	221264
ENSRNOG00000007142	-3.1325	2.60049	-13.0638	3.67e-08	1.06e-06	9.37739	B3gat1	8	beta-1,3-glucuronyltransferase 1	ENSG00000109956	B3GAT1	1	27087
ENSRNOG00000001005	5.32126	0.911621	13.0391	3.75e-08	1.08e-06	8.9145	Fcer2	12	Fc fragment of IgE receptor II	ENSG00000104921	FCER2	1	2208
ENSRNOG00000013535	2.03387	5.85787	13.0346	3.76e-08	1.08e-06	9.08603	Cdh6	2	cadherin 6	ENSG00000113361	CDH6	1	1004
ENSRNOG00000002372	1.66811	2.29894	13.0304	3.78e-08	1.08e-06	9.36316	Sgcd	10	sarcoglycan, delta	ENSG00000170624	SGCD	1	6444
ENSRNOG00000020736	-1.44681	5.50988	-13.0412	3.74e-08	1.08e-06	9.11456	Nadsyn1	1	NAD synthetase 1	ENSG00000172890	NADSYN1	1	55191
ENSRNOG00000032426	-2.84633	3.34374	-13.0246	3.79e-08	1.08e-06	9.34407	Slc10a5	2	solute carrier family 10, member 5	ENSG00000253598	SLC10A5	1	347051
ENSRNOG00000008425	1.76913	6.82148	13.0183	3.81e-08	1.09e-06	9.0458	Nav1	13	neuron navigator 1	ENSG00000134369	NAV1	1	89796
ENSRNOG00000025120	2.7663	1.57453	12.9907	3.9e-08	1.1e-06	9.26125	Gli1	7	GLI family zinc finger 1	ENSG00000111087	GLI1	1	2735
ENSRNOG00000051204	1.42426	5.91827	12.9886	3.91e-08	1.1e-06	9.03179	Dopey2	11	dopey family member 2	ENSG00000142197	DOP1B	1	9980
ENSRNOG00000059461	0.808476	4.87678	12.9889	3.91e-08	1.1e-06	9.10376	B4galt1	5	beta-1,4-galactosyltransferase 1	ENSG00000086062	B4GALT1	1	2683
ENSRNOG00000020500	-0.673345	7.52493	-12.987	3.91e-08	1.1e-06	9.03079	Clk2	2	CDC-like kinase 2	ENSG00000176444	CLK2	1	1196
ENSRNOG00000010023	-1.05193	5.42628	-12.9811	3.93e-08	1.1e-06	9.06248	Slc33a1	2	solute carrier family 33 member 1	ENSG00000169359	SLC33A1	1	9197
ENSRNOG00000001211	-1.22456	6.93305	-13.0006	3.87e-08	1.1e-06	9.03714	RGD1303003	20	homolog of zebrafish ES1	ENSG00000280071	GATD3B	1	102724023
ENSRNOG00000001211	-1.22456	6.93305	-13.0006	3.87e-08	1.1e-06	9.03714	RGD1303003	20	homolog of zebrafish ES1	ENSG00000276612	FP565260.2	1	NA
ENSRNOG00000001211	-1.22456	6.93305	-13.0006	3.87e-08	1.1e-06	9.03714	RGD1303003	20	homolog of zebrafish ES1	ENSG00000160221	GATD3A	1	8209
ENSRNOG00000001211	-1.22456	6.93305	-13.0006	3.87e-08	1.1e-06	9.03714	RGD1303003	20	homolog of zebrafish ES1	ENSG00000160221	GATD3A	1	102724023
ENSRNOG00000020194	-1.54289	5.99874	-12.9896	3.9e-08	1.1e-06	9.04871	Hes6	9	hes family bHLH transcription factor 6	ENSG00000144485	HES6	1	55502
ENSRNOG00000009313	-1.95003	8.52128	-12.9953	3.89e-08	1.1e-06	9.08408	Lrpap1	14	LDL receptor related protein associated protein 1	ENSG00000163956	LRPAP1	1	4043
[truncated: 5,434 more rows]

## Sheet: Study1_Proteomics_kidney_limma
	Sham_1	Sham_2	Sham_3	SnX_1	SnX_2	SnX_3	Gene_names	SnX-Healthy	SnX-Healthy_logFC	SnX-Healthy_P-Value	SnX-Healthy_FDR
[truncated: 6,329 more rows]

[truncated: 5 more sheets: Study2_Proteomics_kidney_limma, Study2_Proteomics_urine_limma, Study2_Proteomics_plasma_limma, ADR_Transcript_kidney_limma, UUO_Transcript_kidney_limma]
