# Supplementary material for: Identification of mechanistic CKD biomarkers in a rat SNx kidney fibrosis model by transcriptomics and proteomics detectable in biofluids
Source: Sci Rep. 2025 Apr 2;15:11200. doi: 10.1038/s41598-025-93894-6 (PMC11962143; doi:10.1038/s41598-025-93894-6)
Supplement: Supplementary file 3 — Supplementary Information 3. [file 41598_2025_93894_MOESM3_ESM.xlsx]

## Sheet: Manuscript Title and Authors
Identification of mechanistic CKD biomarkers in rat SNx kidney fibrosis model by transcriptomics and proteomics detectable in biofluids.
Karin Barnouin, Elisa Tonoli, Clare Coveney, John Atkinson, Margarida Sancho, Andrew Skelton, David J Boocock, Linghong Huang, Joseph Shephard, Tim Johnson, Elisabetta AM Verderio, and Breda Twomey
Supplementary data 2: Gene Ontology Analysis

## Sheet: Intersection proteins
Accession numbers and gene names of intersecting proteins and genes
	Kidneys_study1_and_2_down		Kidneys_study1_and_2_up		Kidney_Plasma_study2_Up		Kidney_Sheff_Study2_down	Kidney_and_Urine_study2_Down		Kidney_and_Urine_study2_Up		Kidney_prot and Kidney_trans_study2_Up		Kidney_prot and Kidney_trans_study2_down		Kidney_study1 and _Kidney_study2_Trans_up		Kidney_study1 and _Kidney_study2_Trans_down
	Accessions	Gene names	Accessions	Gene names	Accessions	Gene names	Accession	Accessions	Gene names	Accessions	Gene names	Accessions	Genes	Accessions	Genes	Accessions	Genes	Accessions	Genes
1	Q07116	Aadat	D3ZD23	Abce1	P26644;Q5I0M1	Apoh	none	Q6DGG1	Abhd14b	F1M403	Abcb9	Q5RK23;A6HAA3;A6HAA4	Abhd1	Q64602;A0A8L2Q812;A6KIT5;A6KIT6	Aadat	Q9Z1P2;A0A8I6A472;A0A8I6AV34;A0A8I6GDI3;Q6GMN8;Q6T487	Actn1	Q64602;A0A8L2Q812;A6KIT5;A6KIT6	Aadat
2	G3V9U0	Abcg2	Q4KM87	Actl6a	Q6MG79; Q6MG90	C4a		Q6AYS7	Acy1a	P26644; G3V9J1	Adipoq	Q6DGG1;F1M5R3	Abhd14b	P13437;A0A0G2K642;A6KRG0;A6KRG2;A6KRG3;A6KRG4;A6KRG5;A6KRG6;A6KRG7;A6KRG8;A6KRG9;A6KRH0;G3V9U2	Acaa2	Q63639;A0A8I5Y0L7;A6KER4	Aldh1a2	Q6DGG1;F1M5R3	Abhd14b
3	Q62651	Abhd14b	Q5RK09	Actn1	Q91YB6	Cfh		P15684	Anpep	M0R9U2	Afm	P15651;A0A8I6AJ45;A0A8I6GC92;A6J1X1;F7F6Q6;Q6IMX3	Acads	B3DMA2;A0A8I5ZR07;A0A8I6AMR1;A0A8L2R5W9	Acad11	P07150;A0A8I5ZKF7;A0A8I6A8I9;A0A8I6GD51;A0A8I6GKK9;A0A8L2UJV2;A6I0K9	Anxa1	P13437;A0A0G2K642;A6KRG0;A6KRG2;A6KRG3;A6KRG4;A6KRG5;A6KRG6;A6KRG7;A6KRG8;A6KRG9;A6KRH0;G3V9U2	Acaa2
4	Q6AYT9	Acaa2	A0A096MJN4	Aldh1a2 Raldh2	B0BNN4	Cfp		D3ZHU5	Ccdc77	P01015	Agt	P70584;A0A0A0MY00;A0A8I6G5Q8;A0A8I6GLN2;A6HWW9;A6HWX0	Acadsb	A0A8I5ZQL5;A0A8I6GGU7;M0RDK9	Acad8	Q07936;A0A8I5ZPN9;A0A8I6A0U3;A0A8I6ANV9;A0A8L2QJ26;A6KEV9;A6KEW0	Anxa2	B3DMA2;A0A8I5ZR07;A0A8I6AMR1;A0A8L2R5W9	Acad11
5	D3ZHD1	Acad11	P61621	Ambp Itil	B1H260	F13b		Q01205	Dlst	P24090	Ahsg	P45953;A6HG07;A6HG08;A6HG10;F7FEX1;Q5M9H2	Acadvl	P15650;A0A8I6GMH0;A6KFD6;A6KFD7	Acadl	P14669;A0A8I6A4M3;A0A8I6AIF7;A6K667;A6K668;A6K669;Q6TXF2	Anxa3	P15650;A0A8I6GMH0;A6KFD6;A6KFD7	Acadl
6	P14740	Acadl	A0A0G2K7X7	Anxa1 Anx1	B1WC21;D3ZQ25	Fbln1		P21704	Dnase1	P02770	Alb	A0A8I5Y5F2;A0A8I6AA64;A0A8I6AU50;A6KGV6;E9PST5;Q5BJU9	Acin1	P08503;A0A8I5Y8D9;A0A8I5ZQ05;A6HWP6;G3V796	Acadm	P55260;A0A0G2K4E9;A0A8I5ZNY4;A6IAZ2;A6IAZ3;A6IAZ4;Q5U362	Anxa4	P45953;A6HG07;A6HG08;A6HG10;F7FEX1;Q5M9H2	Acadvl
7	Q91ZW6	Acadvl	P62914	Anxa2 Anx2	F1M8T7; Q4KM75	Fcrl1		P14740	Dpp4	Q01177	Ambp	Q8R5M5;A0A8I5ZMP7;A0A8I6AJ63;A9CMA9;F8WFI2	Acmsd	P17764;A0A8I5Y5Z3;A0A8I6AA14;A6J4J6;A6J4J7	Acat1	P14668;A0A6F8X2H2;A0A8I5ZUK7;A0A8I6A3S1;A0A8I6A6E5;A0A8I6ADG8;A0A8I6AM08;A0A8I6AS27;A6IHX7;A6IHX8;Q66HH8	Anxa5	Q63270;A0A8I5ZLC2;G3V6S2	Aco1
8	D4A0T8;M0R4N4;Q6I7R1	Aco1	Q4KLL4	Anxa4	D3ZFH5	Itih2		P31977	Ezr	F7FHP0	Angptl3	Q63270;A0A8I5ZLC2;G3V6S2	Aco1	Q9ER34;A0A8I5ZLT6;A0A8I5ZZ31;A0A8I6AIF6;A6HT25	Aco2	A0A8I6AQA1;F1LM60	Arap1	P07872;A0A8I6A041;A0A8I6A8D0;A6HKU5;A6HKU6;A6HKU7;A6HKU8;F1LQC1;F1M609	Acox1
9	A0A096MIX6	Acox1	P61805	Anxa5 Anx5	Q80ZA3	Serpinf1		P07314	Ggt1	D3ZJW6; P04638	Apoa2	D3ZA93	Acot13	Q8VHK0;A0A8I5Y0F4;A6JXB4;A6JXB6;F7F557;Q6AZ44	Acot8	A0A8I5ZXI2;A6IMJ6;Q5M860	Arhgdib	Q499N5;A0A8I6ANW0;A0A8I6GEJ7	Acsf2
10	Q8VI04	Acsf2	O55096	Anxa6 Anx6				F7ET54;F7FIH7	LOC120102889	D4ACR1	Apoa4	D3ZUX7	Acsf3	P07872;A0A8I6A041;A0A8I6A8D0;A6HKU5;A6HKU6;A6HKU7;A6HKU8;F1LQC1;F1M609	Acox1	O88656;A0A8L2Q086	Arpc1b	Q6SKG1;A0A8I6G5I9	Acsm3
11	F1M0Q9	Acsm3	F1LM60	Arap1				A0A096MIX6	LOC298111	D3ZTE0; Q5I0M1	Apoh	O35547;A0A8I6AVE1;A6KG71	Acsl4	Q499N5;A0A8I6ANW0;A0A8I6GEJ7	Acsf2	P49088;A6IDW2;A6IDW3	Asns	A0A8I6AD12;A0A8I6GJ11;B1WC11;G3V9U0	Acss2
12	Q4KLZ6	Acsm5	Q4QQS7	Arhgdia				Q64230	Mep1a	Q99PS8	Azgp1	Q9Z1P2;A0A8I6A472;A0A8I6AV34;A0A8I6GDI3;Q6GMN8;Q6T487	Actn1	Q6SKG1;A0A8I6G5I9	Acsm3	P47853;A0A8I6A8T9;A0A8I6AMG2;A0A8L2R772;A6KRY1	Bgn	Q5M876;A6HYP7;A6HYQ1;A6HYQ5	Acy3
13	A0A0G2JW34	Acss2	Q4KLF8	Arpc5				P28826	Mep1b	Q63207	B2m	Q0D2L3;A6ITV7;A6ITV8;A6ITV9	Agmat	A0A8I6AD12;A0A8I6GJ11;B1WC11;G3V9U0	Acss2	P31721;A6ITC2;A6ITC3;A6ITC4;G3V7N9	C1qb	A0A8I6GH15;M0RC77	Afmid
14	A0A0G2K3A7;F1M885	Acy3	A0A0G2K1J5;F7F9U6;Q6S395	Atp13a1				P07861	Mme	A0A0G2K845;Q8K3R4	C2	A0A0G2JU96;A0A0G2JUA5;A0A8I5ZUE6;A0A8I6AI04	Ahnak	A0A0G2K047;D3ZGU2	Acss3	P31722;A0A0H2UHK1;A0A3B0IYY4;A0A8I5ZWV4	C1qc	Q0D2L3;A6ITV7;A6ITV8;A6ITV9	Agmat
15	O09171	Afmid	P35565	C8g Lcn12				Q9JJ19	Nherf1	P01026; M0RA79	C3	P29411;A0A0G2JWZ7;A0A8I6G902;Q6P2A5	Ak3	Q6AYS7;Q6PTT0;A0A8I5ZU87;A0A8I5ZUM3;A0A8I5ZVF1;A0A8I6ABX8;A0A8I6ANP4;A0A8L2Q7R2	Acy1	Q5FVH0;A0A3B0ITJ1	C1qtnf5	D3ZXY4	Aldh8a1
16	Q0D2L3	Agmat	A0A0G2K2R5	Camk2d				D3ZMI6	Olfm4	P02651	C4	F1M632	Ak9	Q5M876;A6HYP7;A6HYQ1;A6HYQ5	Acy3	Q6P6T1;A0A8I6A2W2;D4A1S0;G3V7L3	C1s	A0A8I6A0K6;A6I343;M0R9I6;Q5XI85	Amt
17	Q6MG85	Agpat1	B2RZ77	Camk2g; Dpt				Q6AYS3	Ppgb	Q6MG90	C4b	Q5U301;A0A8I5Y1X4;A0A8I6A5A3;A0A8I6A782;A0A8I6AAB5;A0A8I6ACD4;A0A8I6ADB4;A0A8I6G255;D4A4D8;F1LPQ9	Akap2	Q4QQW3;A0A8L2Q4Z6;A6JFG4;A6JFG6	Adhfe1	O35783;A0A8I6A8Z7;A6IEC6;F7ETZ4;G3V6S3;Q3MID6	Calu	A0A8I6ARW1;D3ZHD1	Anxa13
18	F1M609	Akr1c1	Q5U362	Canx				P52759	Rida	P14272	C6	P51635;A0A8I5ZT45;A0A8I6AVC9;A6JZ87;A6JZ88	Akr1a1	Q64640;A0A0G2JSL8;A0A0G2K6X9;A6KKR8;A6KKR9;A6KKS0;A6KKS1	Adk	O88767;Q08163;A0A8I6G6M3;A0A8L2QAE6;A6IS10;A6IS11	Cap1	A0A8I6ANR0;A0A8J8YNE4;Q5U1W6	Apool
19	A0A0G2K3A7;F1M885;Q8CJE3	Akr1c12l1	I6L9G5	Cdc37				Q64319	Slc3a1	D3ZWD6	C8a	D3ZF77	Akr1cl	A0A8I6GH15;M0RC77	Afmid	B2GUZ5;A0A8I6AZU8;A0A8L2QPP4	Capza1	P29975;A6K0X8	Aqp1
20	A0A0G2JSV5	Akr1c15	P19945	Ckap4				Q5RKI7	Slc7a13	A0A0G2K896	C8b	Q5U1Y4;A0A8I5ZXF6;A0A8I6GF05	Akr1e2	Q9JM53;A0A0G2K7K2	Aifm1	D3ZSR7	Ccdc102a	Q5I0J9;A0A8L2QVB9	Aspdh
21	A0A0G2JVM0	Aldh4a1	Q5M8C6	Clec10a Mgl Mgl1				P07632	Sod1	P14480	C9	Q8CG45;A0A0G2K3V2;A6ITL3;A6ITL4	Akr7a2	P38918;A0A8L2QCW7;A6ITL5	Akr7a3	A0A0G2JVY9;A0JPK0;A6IHY4;A6IHY5;G3V802;Q91ZX8	Ccna2	O88202;A0A0G2JSM2	Aspg
22	P25093	Aldh8a1	F7FF45	Cmas				Q91ZW6	Tmlhe	P02680; D3ZGK7	Ces1c	Q63639;A0A8I5Y0L7;A6KER4	Aldh1a2	P06214;A0A096MKF7;A0A8I6AS85;A0A8L2R0C7;A6J7V5;A6J7V7	Alad	Q63691;A6J327	Cd14	Q8VI04;A0A8I5ZLC3;A0A8L2QFS3;A6HZZ2	Asrgl1
23	Q64230	Amt	Q91ZN1	Col12a1				D4A234	Uri1	A0A0G2K9I6;G3V7K3	Cfb	Q66HF8;G3V7I5	Aldh1b1	Q02253;A0A8I5YC72;A0A8I6ASH9;A6JDW8;A6JDW9;G3V7J0	Aldh6a1	A0A8I5XWM0;A0A8I5ZKP7;A0A8I6G502;A6IZI0;F1M7X3;Q8R490	Cdh13	O09171;A0A0G2JSK9	Bhmt
24	P13437	Anxa13	G3V8T5	Col15a1						P32038	Cfd	P11884;A0A8I6A4Z6;A0A8I6AGW1;A0A8I6AV92;A0A8I6AVL2;B5DEF6;F1LN88;M0R6F2;Q2QAI2	Aldh2	D3ZXY4	Aldh8a1	P32038;A6K8V5;A6K8V6;A6K8V7;G3V7H3	Cfd	P46844;F7EW70;Q6AZ33	Blvra
25	P46720	Apool	A0A0G2JXT8;D4A8D5	Col15a1 LOC100909752						F1M983;G3V9R2	Cfh	P08289;A6ITE7	Alpl	P70473;A6KJS2;G3V8F9;Q5BK88;Q7TP08	Amacr	P07335;A0A8L2Q875;A6KBS4;A6KBS5	Ckb	P04762;A0A8I6AH65;A6HNR5;A6HNR6	Cat
26	A0A096MJM7	Aqp1	Q99MI5; F1LPD0	Col6a5						P55314	Cfhr4	Q64240;A0A8I5ZUK6;A0A8L2Q3T3;A6J7W8;A6J7W9;A6J7X0;A6J7X1;A6J7X2;A6J7X3;A6J7X4	Ambp	Q7TNJ4;A0A0G2JSI9	Amigo2	P49301;A0A0G2K4E1;A6HG26;Q5BKA0	Clec10a	Q6UPE0	Chdh
27	A0A0G2K0L8	Aspdh	P23514	Copb1 Copb						Q9WUW3	Cfi	P15684;A0A0G2JVE6;A6JC72;G3V7W7	Anpep	A0A8I6A0K6;A6I343;M0R9I6;Q5XI85	Amt	P13233;P55207;A0A097BVJ5;A0A8I5Y1M7;A0A8L2QCQ2	Cnp	Q9EPT8;A6JJ15;A6JJ16	Clic5
28	O88202	Aspg	Q62902	Copb2						P06399	Clu	P07150;A0A8I5ZKF7;A0A8I6A8I9;A0A8I6GD51;A0A8I6GKK9;A0A8L2UJV2;A6I0K9	Anxa1	A0A8I6ARW1;D3ZHD1	Anxa13	Q9JI03;A0A0G2JX47;A0A8I6GA68;A6JTM0;G3V763	Col5a1	P80430;A0A8I6A8X0;D3ZD09;D3ZSB0	Cox6b1
29	P07314	Asrgl1	P62907	Copg1 Copg						P02454	Col18a1	Q07936;A0A8I5ZPN9;A0A8I6A0U3;A0A8I6ANV9;A0A8L2QJ26;A6KEV9;A6KEW0	Anxa2	A0A8I5ZM12;A0A8I5ZQ42;A0A8I6A9P3;A0A8I6AH11;F7F6D1;Q6IRJ7	Anxa7	A6JNL5;F7EVZ0;Q9JI04	Col5a3	Q704S8;A0A0H2UI21;A0A8L2RAJ5;A6JTY8;A6JTY9	Crat
30	Q01984	Atp5f1e	O08629	Coro1a Coro1						A0A0G2K7X7	Col1a1	P14669;A0A8I6A4M3;A0A8I6AIF7;A6K667;A6K668;A6K669;Q6TXF2	Anxa3	A0A8I6A1F2;A0A8I6AA56;A0A8I6AKR4;B2RZ62;G3V9Y9	Ap3s1	D3ZUL3;M0RDR9	Col6a1	P23928;A6J4F4;A6J4F7	Cryab
31	A0A0G2K1S6	Atp5mpl	P70615	Cpb1 Cpb						P07151	Col1a2	P14668;A0A6F8X2H2;A0A8I5ZUK7;A0A8I6A3S1;A0A8I6A6E5;A0A8I6ADG8;A0A8I6AM08;A0A8I6AS27;A6IHX7;A6IHX8;Q66HH8	Anxa5	Q9R1T5;A0A0H2UHY8;A0A1W2Q5Z4;A0A1W2Q6K0;A0A8I6ATJ0;A0A8L2RC31;A6HGJ4;A6HGJ6;A6HGJ7	Aspa	A0A8I5Y5R7;A0A8I5ZTZ9;A0A8I6ALT7;A6JKB9;A6JKC0;F1LNH3;Q5EB88	Col6a2	P10633;A0A0G2JSU8;A0A0G2K0N7;A0A8I5ZLX8;A0A8I5ZWE8;A0A8L2QP93	Cyp2d1
32	Q6AYR8; P02803	Bhmt	P38983	Dad1						P13941	Col3a1	A0A8I5ZM12;A0A8I5ZQ42;A0A8I6A9P3;A0A8I6AH11;F7F6D1;Q6IRJ7	Anxa7	Q8VI04;A0A8I5ZLC3;A0A8L2QFS3;A6HZZ2	Asrgl1	D4ADP9	Copz2	P05182;A0A0G2K5X9;A0A8I5ZS79;A0A8I5ZXI6;A0A8L2Q8J4;A6HXJ0;A6HXJ1;A6HXJ2;A6HXJ3;A6HXJ4;Q71US7	Cyp2e1
33	P05182	Blvra	D4A7W8;G3V6A9	Dars1 Dars Drs1						D4AC70	Col8a1	Q499N2;A0A8L2Q9R9	Ap5m1	P10719;A6KSA2;A6KSA3;G3V6D3;Q0QEP3	Atp5b	Q91ZN1;A0A8I6A217;A6I9B7;A6I9B9;A6I9C1	Coro1a	Q8VID1;A0A8I5ZUW8;A6KGZ7;A6KGZ8	Dhrs4
34	Q6P6G4;Q7TP58; Q63910	Bpgm	D3ZAS9	Ddrgk1						F1LR02; Q04931; F1LXY6	Cp	A0A8I6ANR0;A0A8J8YNE4;Q5U1W6	Apool	P35435;Q6PCU0;Q6QI09	Atp5c1	A0A8I6ANC4;A0A8I6ARY1;A0A8I6GLR9;B2RYG0;G3V624	Coro1c	M0R4N4;Q6I7R1	Dhrs7l1
35	Q920F5	Ca1	D3ZSA9	Des						Q9EQV9	Cpb2	P29975;A6K0X8	Aqp1	A0A1W2Q641;D4A133	Atp6v1a	Q00495;A0A0G2K3Y5;A0A0G2KBC4;A0A8I5ZP95;A0A8I5ZZ98;A0A8I6A5F0;A0A8I6AEN2;A6IXF7;D4ACA7;Q3B7T5	Csf1r	Q4KLP0;A0A8L2UN65	Dhtkd1
36	Q8VID1	Cat	P48037	Dnajc3 P58ipk						A0A0G2K828;D4ACR1	Cpn2	A0A8I6AQA1;F1LM60	Arap1	A0A8I5ZXM1;A0A8I6A161;A0A8I6AHT1;A6HCE7;A6HCE8;A6HCE9;A6HCF0;F7EUL0;Q6P503	Atp6v1d	P32577;A0A8L2QZY0;A6J4X1	Csk	Q63342;A0A0G2K9Y2;A6I4V8;A6I4V9;Q5RKL4	Dmgdh
37	P13697	Chdh	Q9EPB1	Dpp3						Q63273	Crp	O08701;A0A8I6AM02;A6HCG4;G3V7H6	Arg2	F1LU71;A0A8I5Y7Q4;A0A8I5ZJH2;A0A8I5ZWD4;A0A8I6AAT9;A0A8I6B3A4;A0A8I6GL97	Auh	Q00657;A6J4R6;F1LS79	Cspg4	P31430;A6IZW1	Dpep1
38	P51574	Chst13	G3V9R8	Dpp7 Dpp2						Q9QYJ4; Q8VHC1	Cst6	Q5FVC2;A0A0G2K0V4;A0A1B0GWX6;A0A1B0GWX8;A0A1B0GWY5;A0A8I6AFM5;A0A8I6AK99;A0A8I6GLA8	Arhgef2	P07151;A0A8I6A949;A6HPR6	B2m	P24268;A0A8I6AKF2;A6HY43;A6HY44;A6HY45;F7F3R8;Q6P6T6	Ctsd	P14740;A0A0G2JTX5;A0A0G2K238;A6HLV4;A6HLV5;F1M7X5	Dpp4
39	Q7TQ16	Cisd3	F1LRI5	Dpysl2						B1WC02	Ctps1	A0A0G2JZE7;A0A8I5ZRN9;A0A8I5ZUE2;A0A8I6ARU3	Arhgef40	P80225;A0A8I6A607;G3V722	B4galt1	P16228;A6IC24;A6IC25;A6IC26;A6IC27	Ctse	Q62651;A0A8L2QF26;A6J9L4	Ech1
40	Q03248	Clic5	Q4QQV4	Dpysl3 Crmp4						D3ZHV2	Dpt	Q5I0J9;A0A8L2QVB9	Aspdh	Q6GMN2;A0A8I6A2M9;A0A8I6AD66;A0A8I6GJY9;A6HLA0;A6HLA1;A6HLA2;A6HLA3	Baiap2	Q02765;A0A8I6AES4;A0A8I6AHZ2;A6K2Z7;D3ZZR3	Ctss	Q3MIE0;A0A0G2JY01;M0RDR1	Echdc3
41	Q63965;Q9JHY2	Cml1	Q68FR6	Eef1g						Q08420	Ecm1	O88202;A0A0G2JSM2	Aspg	A6JJK5;A6JJK6;F7EQF3;Q9JK59	Bak1	Q9R1T3;A0A8I6GG04;A6KL32;A6KL33	Ctsz	A0A0G2K1Q9;A0A8I5Y1G9;A0A8I5ZSB9;A0A8I5ZVK0;A0A8I5ZZJ7;A0A8I6AAL7;A0A8I6AUN0;A3E0T0;A6KF70;F7FPP7;G3V874;Q9JMB3	Epb41l3
42	Q5I0J9	Cox6b1	NA for rat	Efemp2						G3V6K6	Egfr	P29418	Atp5e	Q63690;G3V8T9;Q9JKL3	Bax	Q921A4;A0A1K0GY57;A6HKY0	Cygb	Q6UPE1;A0A8I5Y801;A0A8I5Y9W6;A0A8I5ZXZ1;F2W8A8;F7ELJ5;Q66HF3	Etfdh
43	O35077	Crat	Q4FZY0	Efhd2 Sws1						Q496Z0	Elp2	P19511;A0A096MK68;A6HUP1;A6HUP2	Atp5f1	O35854;A0A8I6AKN8;A6JB55;A6JB56;G3V8U8;Q6P784	Bcat2	Q07266;A0A0H2UHL9;A6KAS2;A6KAS3;A6KAS4;A6KAS5;C6L8E0	Dbn1	M0R7F6	Etnppl
44	D4A5J1	Cryab	Q9JLT0	Eif2s1 Eif2a						P25031	ENSRNOG00000066380	Q6PDU7	Atp5l	P35738;A0A0A0MXW1;A6I1S6;B0BNK6	Bckdhb	Q01129;A0A8I6AAW0;A0A8I6GFI0;A6IG64;A6IG65	Dcn	P25093;A6JCP0;F1M6W1	Fah
45	P20812	Cyp2a3	B2GVB9	Eif3a Eif3s10						Q6TUD4	ENSRNOG00000069250	Q06647;A6JLH7;A6JLH8;A6JLH9;A6JLI0;A6JLI1;A6JLI2;A6JLI3	Atp5o	O09171;A0A0G2JSK9	Bhmt	A0A8I5ZMV4;A0A8I5ZUS6;D3ZCK4	Def6	Q6AYQ8;A6HCX6	Fahd1
46	P08683	Cyp2c11	D3ZAN3	Eif3b Eif3s9						M0RBF1	F10	P62815;A0A8I6ADT2;A0A8I6AE86;A6KU69;A6KU70	Atp6v1b2	Q68FT5;A0A8I5XVF4;F1LMG2	Bhmt2	P48675;A0A8I6ANC1;A6JW26;Q6P725	Des	Q9EQ76;A0A0G2JSI0	Fmo3
47	Q704S8	Cyp2d1	Q6P9U0	Eif3g Eif3s4						P31211	F12	Q5FVI6;A0A8I5Y7J1;A0A8I5YCN2;A0A8I6GCD8	Atp6v1c1	A6J7G9;A6J7H0;A6J7H1;A6J7H2;F7FBS0;Q3B8N9	Bphl	Q9EPB1;A0A8I6AJ69;A6JT47;A6JT48	Dpp7	Q8K4B7;A0A8I6AMY0;A6IDA1;A6IDA2;G3V6F2;Q8K4B6	Fmo4
48	Q6AYQ8	Cyp2e1	A0A0G2JZI2	Eif4g1 LOC100911431 LOC680559						F1LR92	Fetub	A0A0G2K9J2;A0A8I5ZQ24;A0A8I5ZWI2;A0A8I6ACJ2;A0A8I6AIG1;A6JFI5;A6JFI6;A6JFI7;E9PTI1;Q5XIL1	Atp6v1h	Q9Z1N4;A0A0G2K0V3;A0A8I5ZPR2;A0A8L2Q072;A6JGQ6;A6JGQ7;A6JGQ8;A6JGR1;A6JGR3	Bpnt1	Q62952;A0A8I6AUS8;A6J3L6;A6J3L7;A6J3L8;A6J3L9	Dpysl3	A0A8I5ZN89;A0A8I5ZUK9;D3ZT90	Gcdh
49	P19468	Dhrs4	P14668; D3Z9E1	Emilin1						P08649; Q7TQ70	Fga	P11960;A0A8I6GGA5;A6J973;A6J974;B1WBN3;F7EV94;Q5EB89	Bckdha	Q811M5;A6KGC9;A6KGD0;F1M7F7	C6	Q68FR6;A0A8I5ZKV4;A0A8I6AK06	Eef1g	P70552;A0A8L2Q831;A6HPE2	Gchfr
50	D3ZS55	Dhrs7	D4A1Q9	Eno2 Eno-2						D3ZFH5	Fgb	P46844;F7EW70;Q6AZ33	Blvra	Q4V8B0;A6KGD5	C7	Q4FZY0;A6ITX5;A6ITX6	Efhd2	P19468;A0A8I5ZU55;A6I1G6;A6I1G7;A6I1G8	Gclc
51	Q64319; B0BNN3	Dhrs7l1	D3ZL50	Eprs1 Eprs						Q62930	Fgg	Q8R2H3;A6JYM7	Bsnd	Q62736;A0A0G2JTV2;A0A8I6A6T4;A0A8I6AMH6;A0A8I6GCL3;A0A8I6GEY4;A6IEM4;A6IEM5;G3V9E3	Cald1	D4AC36	Eif3f	P48508;A6HVF9;Q71S94	Gclm
52	Q9EQ76	Dhtkd1	D4A9N5	F13a1 F13a						Q62894	Gc	Q9WTT7;A0A8I5ZSL9;A0A8I6A786;A6HBA8;A6HBA9	Bzw2	Q07009;A0A8I5Y510;A0A8I6A3B4;A6JGL9	Capn2	A0A8I5Y8H4;A0A8I6A0E5;A6HFS9;A6HFT1;F7F7A6;Q6P3V8;Q812C4	Eif4a1	D3ZPV8	Ggct
53	P28826	Dmgdh	Q3MIE4	Fbn1						Q62975	Grik5	P01026;A0A8I6ATP7;M0RBF1;M0RBJ7	C3	A0A8I5ZXZ9;B2GV57	Cars2	A0A8I6AGS7;D3Z9E1	Emilin1	P07314;A6JKI9;A6JKJ2;A6JKJ6;M0R8W8	Ggt1
54	D4A5Q9; B2GUY4;D4A559	Dmtn	Q7TP47	Fermt3 Syncrip Hnrpq Ab2-339						Q5EBA7	Hgfac	P08649	C4	P43527;A0A8I6ACX6;A6KQJ8;A6KQJ9;F1LQZ4;Q91W32	Casp1	P07323;A0A8I5ZMA1;A0A8I6A5I1;A0A8L2Q241;A0A8L2Q2X9;A6ILK0;A6ILK1;A6ILK2;A6ILK4	Eno2	A0A0G2JUZ5;A0A8I6AP64;A0A8I6AWV3;D4A5Q9	Gldc
55	P24473	Dpep1	D3ZH41	Fgl1						P20059	Hpx	Q811M5;A6KGC9;A6KGD0;F1M7F7	C6	P32232;A0A8I6AE71;A6JK04;A6JK05;A6JK06;A6JK07	Cbs	Q9JJ22;A0A0G2K2Y3;A0A8I5ZYK5;F7F4R3;Q4KMA8	Erap1	Q0VGK3	Glyctk
56	D4A1K4	Dpp4	P19223	Flna						G3V615	Hrg	Q66HG6;A6K2L9	Ca5b	P26051;A0A0K2JZ63;A0A0K2JZI6;A0A0K2JZP0;A0A0K2JZT3;A0A8I5ZKQ4;A0A8I5ZRQ4;A0A8I6ADP5;A0A8I6AHM1;A0A8I6APP8;A0A8I6GJ35;A0A8I6GMQ6;A0A8J8XKD3;A6HNP7;A6HNP8;A6HNP9;A6HNQ0;A6HNQ1;A6HNQ2;A6HNQ3;D3ZGF1;F1LSA1;O08779;O70509	Cd44	A0A8I5Y591;A0A8I5ZUG2;A0A8I5ZUU5;F1LU48	Ergic1	O35077;A0A8I6AA38;A6KCH1;A6KCH2	Gpd1
57	Q6I7R1	Ech1	Q6AYD3; Q5PQK2	Flnb						P15473	Igfbp3	Q8R4C0;A0A0G2JYD8;A6I6C6;G3V7U6	Capn5	D3ZAN2	Cdhr2	O08619;A6J7C8;G3V811	F13a1	P24473;B6DYQ0	Gstk1
58	A0A0G2JUZ5	Echdc3	D3ZHA0	Flnc						P04276	Il1rap	P04762;A0A8I6AH65;A6HNR5;A6HNR6	Cat	A0A8I5YCF6;A0A8I6A2D7;A0A8I6AD55;A0A8I6AGG9;A0A8I6G7G6;D3ZUX5	Chchd3	Q810F4;A0A0G2JUB0;A0A8L2RAP9;A6IE63;A6IE64;A6IE65;A6IE66;A6IE67;A6IE68	Fam3c	P57113;A0A0G2K6H2;A0A8L2QW65	Gstz1
59	P20812	Epb41l3	Q4AEF8	Flnc Abpl Fln2						Q63621	Inhca	A0A0U1ZFN5;A0A8I5ZWU2;A0A8I6AFF7;A0A8I6G3R2;A0A8I6G861;D3ZV15	Cbl	Q6UPE0	Chdh	B2GUZ9	Fam49b	P46953;A0A0G2JSV5;A0A8I5ZR59;A0A8I6ASE6;A0A8I6GEE8;A6H9K8;A6H9L0;A6H9L1;A6H9L3	Haao
60	Q499N5	Etfdh	A0A0G2K1L0	Fscn1						B2RYM3	Itih1	P47727;A0A096MJ24;A0A0G2JSV2;A0A0G2JSW9;A0A0G2K658;A0A8I5XVU2;A0A8I5ZT21;A0A8I5ZUP5;A6JLM2;M0R3X6	Cbr1	D3ZUU6	Clec3b	A0A0G2JY81;A0A8I6AAN5;B1WC21;D3ZQ25	Fbln1	Q8CHM7;A0A8I6A4D4;A0A8I6ACR4;A0A8I6AE81;A0A8I6G9A1;A0A8I6GIV8	Hacl1
61	M0R7F6	Etnppl	D4AD15	Fus						P01048	Itih2	Q7TS56;A0A8I6A1W1;A6KIR4;A6KIR5;A6KIR6	Cbr4	Q9Z0W7;A3FM27;A6IT48;A6IT49;G3V8C4	Clic4	A0A8I6A897;A0A8I6G7Y9;A6HPW8;A6HPX0;G3V9M6;Q9WUH8	Fbn1	O35952;A6HCX7;F1LQI1	Hagh
62	P07379	Fah	Q6P7A9	Gaa Ptpn6 Ptph6						P10959	Itih3	A0A0G2K8K1;A0A8I6APJ7	Ccdc186	Q9EPT8;A6JJ15;A6JJ16	Clic5	A0A0B4J2J0	Fcgr1a	P22791	Hmgcs2
63	M0R4N4	Fahd1	B2RZB6	Ganab						P12346	Itih4	Q810U0;A0A8I6A494;A0A8I6GF21;A0A8L2Q0J1	Ccdc50	Q66HG3;A6K5L1;A6K5L2;A6K5L3	Cndp1	B2GVB9	Fermt3	Q01984;A6JSX2;A6JSX3	Hnmt
64	D3Z9R8	Fancl	P20595	Gars1 Gars						Q63416	Klkb1	A0A8I5Y603;A0A8I5ZXZ6;A0A8I6AEN6;A0A8I6ASK6;A6J603;F1M8T7;Q4KM75	Cd5l	P13941;A6INT2	Col3a1	A0A096MJJ8;A0A096MJW1;A0A8I5ZP41;A0A8I6A043;A0A8I6A3F3;F7EYM3;Q5U2V1	Fkbp10	Q4V8F9;A0A8I5ZUC6;A0A8I6AF67;A0A8L2QRI7	Hsdl2
65	P11517	Fmo3	D3ZFD0	Gbp7						A0A0G2JVQ5;A0A0G2KA54;F7EUK4; G3V9R9; P53813	Kng1	P21272;A0A8L2R490	Cebpb	A0A8I6AA24;D4AC70	Col8a1	A0A8I5Y6H8;A0A8I5Y7V6;A0A8I5ZV49;A6KRS3;C0JPT7	Flna	A0A8I5Y5E0;D3ZUX1	Hykk
66	Q62687	Fmo4	G3V928	Gcn1 Gcn1l1						P02466	Kng2	Q9WUW3;A0A0G2K135;A0A8I6AAQ9;A0A8I6AC86;A6HVQ2	Cfi	O89046;A0A8I5ZSU6;A6HYU3;A6HYU4;A6HYU5;G3V940	Coro1b	D3ZHA0;A0A0H2UHR7;A0A8I5ZMA0;A0A8L2R384	Flnc	P41565;A0A0G2K4Q0;A0A8I6GDC1;A6KRV1;A6KRV2;A6KRV3;A6KRV4;A6KRV5;A6KRV6;Q5XIJ3	Idh3g
67	Q9Z2Y0	G6pc1	F1LS72	Gstm1						P13635	Lars1	P61023	Chp1	Q6AYT0;A0A8I5Y5T4	Cryz	P04937;A0A096P6L8;A0A8I5ZXR2;A0A8I6A5M1;A6KFG4;A6KFG5;A6KFG6;A6KFG7;A6KFG8;F1LST1	Fn1	Q5BK17	Iyd
68	P10633	Gcdh	F1M707	Gucy1b1 Guc1b3 Gucy1b3						Q9QX79	LOC100360761	Q5QT56;A6JZM4;A6JZM5	Cldn19	Q64611;A0A0G2K5P7;A0A8I5ZQK7;A0A8I6A6P6;A0A8I6AMR0;A0A8I6GBN4;A0A8L2Q7U2;A6KCT1;A6KCT5;B3VPA7;B5LSW7;Q9R1F5	Csad	P85845;A0A0G2KAM4;A0A8I5ZKQ7;A0A8I6AK10	Fscn1	D4A5J1	Kbtbd11
69	D3ZAU3	Gchfr	Q9R0T3	Hars1 Dnd1 Hars rCG_49447						A0A0G2JYC4	LOC100361907	P49301;A0A0G2K4E1;A6HG26;Q5BKA0	Clec10a	A0A9K3Y6N7;A6KU83;Q9ER28;Q9ERL1	Cybb	P16261;Q9WTT6;A0A8I6AI81;A6I0M3;F7E134;Q9JKB7	Gda	Q02974;A0A8I6AMT1;A0A8I6G7X9;A0A8L2QMK2	Khk
70	Q62669	Gclc	A0A0G2JWB6	Havcr1 Kim1						A0A0G2K477	Lum	O55156;A0A0G2JZF2;G3V949	Clip2	D3ZFQ8	Cyc1	Q8K3K9;A6K0H2;Q0R3X4;Q6IRE3	Gimap4	O88867;A0A8I6AJ51;A0A8I6AUG8;A6JGB4	Kmo
71	Q6DGG1	Gclm	Q9Z1A6	Hdlbp Hbp						Q5M7T5	Macf1	M0RAD5	Clpp	A0A8I6A4P4;A6HV98;B2GV15;F7EMY8;Q99PU6	Dbt	Q9ESH6	Glrx	P19332;A0A8I5YBN3;A0A8I5ZN00;A0A8I5ZN17;A0A8I6ABX0;A0A8I6ARL1;A0A8J8XUY4;A0A8K1TMD4;A0A8K1TN53;A0A8K1WG57;A0A8K1WHA3;A0JN25;D3ZKD9;D4A1Q2;F1LST4	Mapt
72	Q5U2P9	Ggct	Q6AXX5;Q6TUD3	Hexb						B2RZ77	Map1	Q5U2U0;A0A8I5ZTK0;A0A8I6A6Y6;A0A8I6A7H5;A6J5E7	Clpx	O08875;A0A0G2KB92;A0A1W2Q632;A0A1W2Q6Q2;A0A3Q9WS43;A0A8I5ZWQ8;A0A8I6AMY9;A0A8L2QB01;M0RDS3;Q9WVP7	Dclk1	A0A0G2K1K3;A0A8I6A5G9;Q6IN37	Gm2a	P13697;A0A0G2K1S6;A6I1V2;F1LQQ1	Me1
73	D3Z8F1	Ggt1	P85845	Hnrnpc Hnrpc						F7FMS0; Q9JJS8	Masp2	Q5I0K3;A0A8I6B1P6;A6HUL3	Clybl	P14173;A0A8I5ZV89;A0A8I5ZZE6;A0A8J8YSU9;A0A8L2Q249;A0A8L2QX98;A6KJB3;A6KJB5;A6KJB6;D3ZMA5	Ddc	Q80T18;A0A8I6AD83;A0A8I6GI11;A6J9J2;A6J9J4;F1M8F4	Gmfg	A0A8I5ZT17;A0A8I6AD95;D4A1K4	Misp3
74	Q64602; D3ZXY4	Gldc	P40329	Hyou1 Orp150						D4A4L6;M0R692	Mst1	Q6Q0N1	Cndp2	Q5U216;A0A8I5ZKB3;A0A8I5ZVU6;A0A8I6A2E4;A0A8L2QK42	Ddx39a	Q6P7C7;A0A8I6AAJ2;A0A8I6GLH9;A0A8L2Q5B8;A6K0K2;Q9QZF6	Gpnmb	Q920F5;A6IZI5	Mlycd
75	P27653	Glyctk	P81718	Igfbp7						P25236	Mtmr2	D3ZRX9	Cnn2	P08461;A6J4E7	Dlat	A0A8I6ARN0;D3ZQI1	Gpx7	P27653;A0A8I5ZJK8;A0A8I5ZXQ9;A0A8I5ZYX2;A0A8I6G8Q3;A0A8I6GID7;A6HCA0;A6HCA1;G3V6S5;Q5EBC3	Mthfd1
76	D3ZPV8	Gpd1	Q63798	Ipo7						P08934	Mug2	P13233;P55207;A0A097BVJ5;A0A8I5Y1M7;A0A8L2QCQ2	Cnp	Q6P6R2;A0A8I5ZXS2;A0A8I6A971;A0A8I6GBX4;A0A8L2Q3R1;A6HB44;A6HB45	Dld	D4A0C3	Hid1	D4A3V2	Ndufa6
77	Q9QXT4	Gsta1	P18614	Itga1 Mmp12 Mmel						Q63678	Myo1e	A6HJ78;A6HJ79;Q5XIA5	Coasy	Q63342;A0A0G2K9Y2;A6I4V8;A6I4V9;Q5RKL4	Dmgdh	P04256;A0A0G2K968;A0A8I6ALC1;A0A8J8YF53;Q5I0M7;Q6P6G9	Hnrnpa1	A0A8I5ZPY8;F1LPG5;Q2XTA8	Ndufb4
78	D3ZD09	Gsta3	P15178	Itgb2						P17475	Nsdhl	A0A8I5ZL13;B5DF59;F1M124	Cobll1	P31430;A6IZW1	Dpep1	F1M3Q1	Ifitm1	A0A8I6AKU6;A0A9K3Y8A9;B5DEL8	Ndufs5
79	P57113	Gsta4	G3V9M6	Kpnb1						P62963	Pfn1	A0A8I5ZV54;A0A8I6GLR1;A6JK98;A6JK99;A6JKA0;F1LR02;Q9WUW5	Col18a1	P14740;A0A0G2JTX5;A0A0G2K238;A6HLV4;A6HLV5;F1M7X5	Dpp4	A0A0G2JVP4;A0A0G2JYX2;A0A8I5YC45;A0A8I5ZVS4;A0A8I6APC0;F1LM30;F1LN61;F1LPR6;F1LPW0	Ighm	A0A8I6AES7;A6K8N5;A6K8N6;A6K8N7;A6K8N8;A6K8N9;F7ELE5;Q5RJN0	Ndufs7
80	Q3MHS3	Gsta6	P04961	Krt8 Krt2-8						P20762; A0A0G2JV32;D3ZNS1	Phldb1	P02454;A0A068F650;A0A8I5ZRN2;A0A8I6G8P4;A0A8I6GG08;A6HI72	Col1a1	Q63150;A0A8I6AEZ1;A6HR83	Dpys	D3ZLZ7;A0A0A0MXZ8;A0A8I6AC45;A0A8I6AI29;A0A8I6APP1	Impdh1	Q7TQ94;A0A8I6AHC1;A0A8L2Q1A7;A6JFY4	Nit1
81	M0R9I6	Gstk1	Q63639	Lars1 Lars						Q63356	Plg	A0A8I6AFK7;A6IWQ2;A6IWQ3;A6IWQ4;F1MA59;Q5FWY9;Q62677	Col4a1	A0A8I6AG90;F1LYX9	Dsg2	A0A0G2JXN7;A0A8I6A257;D3ZEX6	Irf4	Q6AY80;A0A8L2QE49	Nqo2
82	P04762	Gstt3	A0A0G2K014;Q5XI38; P15205	Lcp1						D4A5F7	Pros1	A0A8I6AHV3;A0A8I6AVZ9;F1M6Q3;Q62676	Col4a2	Q5XIC0;A0A0G2K277;A0A8L2QBE2	Eci2	A0A8I5ZTY9;A0A8I5ZVL1;A0A9K3Y824;B2RYB8;Q4KLK5	Itgb2	A0A0G2JXN8;A0A8I5ZMZ6;A0A8I6A2N1;A0A8I6ADC9;A0A8I6GDH8;B5DF26	Osbpl8
83	G3V6H5	Gstz1	Q80ZA3	Lman1 Ergic53						P14272;Q9WUW3	Reg3b	A0A0G2K601	Col4a6	O35568;A0A8I6A1M7;A0A8I6A7G5;Q6AXN2	Efemp1	Q64632;A0A0G2K4V5;A6HKS7;A6HKS8;F1LSD3	Itgb4	P07379;A6KKZ5;A6KKZ6;A6KKZ7;A6KKZ8;A6KKZ9	Pck1
84	Q8K4B7;Q9EQ76	Haao	Q499P8	Lmna Lmn1						P42854	Reg3g	D3ZUL3;M0RDR9	Col6a1	A0A0G2K2R5;A0A0G2KAI7;A0A8I5Y8F2;A0A8I5ZL36;A0A8I5ZU12;A0A8I5ZYG7;A0A8I6GJS4;A6HZ65;A6HZ66;F7FBE9;Q5XI84	Efemp2	Q5BJY9	Krt18	F1M0Q9	Pm20d1
85	A0A0G2JXN8	Hacl1	O08619	Lmnb1						O55004	Rnase4	Q5I0I9;A0A0G2JSW8	Coq10b	P70541;A0A8I5Y606;A0A8I5Y9W9;A0A8I5ZKY2;A0A8I6APB6;A0A8L2QD14;A6JZB6	Eif2b3	Q10758;A0A8I6G4D8	Krt8	Q2V057;A6J9X8;A6J9X9;A6J9Y0;B0BNG1	Prodh2
86	O35952	Hagh	Q63617	Lrp1						P48199	Selenop	Q63159;A6IIF5;Q4G082	Coq3	Q99372;A0A0G2JST5;A0A8I6APE9;A6J0H3;A6J0H4;A6J0H5;A6J0H6;D4A9U4	Eln	A0A0G2K014;A0A8I6AGS0;A0A8I6G984;Q5XI38	Lcp1	Q68FT3;A0A8L2QB18	Pyroxd2
87	F1LRY5	Hba1	Q64240	Lsm8 LSM8						Q64240	Serpina1	Q5BJQ0;A0A8L2R303	Coq8a	A0A8I6GLC2;D4AE03	Engase	P11762;A0A8I6A5K0;A0A8I6A6C2;A0A8I6GGC8;A6HSN4	Lgals1	Q03336;A6JZT8	Rgn
88	P00502;P04904;P14942;Q6AXY0	Hba-a2	P27952	Luc7l						F1LQT4	Serpina10	Q68FT1;A0A8L2UJQ7	Coq9	A0A0G2K162;D3ZAY2;D3ZAY7;D3ZDT1;D3ZM69	Epb41l2	P08699;A0A0G2JXB1;A0A0G2JXN6;A0A8I6ATC2;A6KE45;A6KE46;A6KE49;A6KE51;V5QQP9	Lgals3	Q64380;F1LRY5	Sardh
89	M0R4N4;Q6I7R1	Hbb	Q07936	Luc7l2 Luc7l2_predicted rCG_28248						P05544;P05545	Serpina3k	Q91ZN1;A0A8I6A217;A6I9B7;A6I9B9;A6I9C1	Coro1a	P80299;A0A8I6A4C3;A0A8I6GHQ4;A0A9K3Y813;A6K6L7;A6K6L8;Q5RKK3	Ephx2	O70513;A0A8I6A7P6;A0A8L2Q1D1;A6HL50	Lgals3bp	D3ZS55	Sbspon
90	O88867	Hbb-b1	Q63081	Lyn						Q6P734	Serpina3l	P10818;A0A8I5ZL99;A0A8L2PZ08;A6J1U7	Cox6a1	B0BNE5;A0A8I6A7Q6;A0A8I6A8R5;A0A8I6AWW9;A0A8L2UIQ9	Esd	P48679;A0A0G2JTC5;A0A0G2K3R2;A0A1B0GWU9;A6J680;A6J681;A6J682;G3V8L3;Q6P6U3	Lmna	Q6AYR8	Scrn2
91	Q8K4R8	Hmgcs1	P30427	Map1b						P09006	Serpina3m	P80430;A0A8I6A8X0;D3ZD09;D3ZSB0	Cox6b1	Q9Z1X1;A0A0G2JXJ7	Esyt1	P70615;A0A8I6ACW5;G3V7U4	Lmnb1	P51574;A0A8I6AKI9;F1LMZ1	Slc15a1
92	P23928	Hmgcs2	Q4G061	Marcks Macs						P05544	Serpina3n	P80431;A0A8I5ZZJ9;A6IV38;A6IV39	Cox7b	P13803;A0A8I6A070;A0A8L2QBI2;A6J4P6	Etfa	G3V928;A0A8I6A0U0	Lrp1	Q63424;A0A0H2UHA7;A0A8I5ZLE5;A0A8I6A6Q4;A0A8I6AL86;A6IRB4;A6IRB5;A6IRB6;A6IRB7;A6IRB8;Q5U401	Slc15a2
93	Q3MIE0	Hnmt	P63245	Mars1 Mars						Q5M8C3	Serpina4	P13635;A0A0G2K9I6;A0A8I6A708;A6IHC3;A6IHC4;A6IHC5;G3V7K3	Cp	Q68FU3;A0A8I6A6U0;A6JAH9	Etfb	P51886;A0A8I6AIN1;A6IG66	Lum	A0A8I6AID2;A6HUT7;Q5U2P9	Slc16a4
94	Q63424	Hsdl2	Q4KM49	Mcam Muc18						P05371	Serpina6	Q704S8;A0A0H2UI21;A0A8L2RAJ5;A6JTY8;A6JTY9	Crat	Q6UPE1;A0A8I5Y801;A0A8I5Y9W6;A0A8I5ZXZ1;F2W8A8;F7ELJ5;Q66HF3	Etfdh	P15205;A0A8I5ZMJ9;A0A8I5ZWW4;A6I568;A6I569;A6I570	Map1b	Q9R0W2;A0A0G2JSP9	Slc22a2
95	Q5BK17	Hykk	P04905	Mfap4						Q5PPL3	Serpinc1	P23928;A6J4F4;A6J4F7	Cryab	P25093;A6JCP0;F1M6W1	Fah	P13444;F1LZ34	Mat1a	Q9WTW7;A0A8L2R5A1;A6J2Y7	Slc23a1
96	A2VD16	Idh3g	Q62952	Mogs Gcs1						Q64268	Serpind1	Q9QYU4;A0A0G2K568;A0A8I5Y7D3;A6I8Q4;A6I8Q5	Crym	A6HAQ2;B0BN65	Fam49a	Q63341;A0A8I5ZTA4;A0A8I6AB53;A6JN29;R9PXT7	Mmp12	P97700;A0A8I5YBI3;A0A8I6GIJ8;A6HG73;A6HG74;A6HG75;G3V6H5	Slc25a11
97	Q2V057	Iyd	Q91Y81	Myh10						Q80ZA3	Serpinf1	Q00657;A6J4R6;F1LS79	Cspg4	P14408	Fh	P33436;A0A8I5Y0Q9;A6KD58;E9PSM5	Mmp2	P43427;A0A0G2JT43;A0A8I5ZM52;A0A8I6A4B7;A6IUC8;A6IUC9;B1WBQ4	Slc2a5
98	P48508	Kbtbd11	O35142	Myo18a						F7FHF3	Serpinf2	P01041;A0A8I5Y627;A6JK23;A6JK24;A6JK25;A6JK26	Cstb	Q62658;A0A8I6ANT3;A0A8L2UIH3;A6KHI5;A6KHI7;A6KHJ0	Fkbp1a	Q62667;A0A140TAE0;A6I9J8	Mvp	Q8K4R8;A0A0G2K7V6;A6JT18;A6JT20;G3V7E1	Slc34a3
99	G3V6S2	Keg1	P07323; B2RYB8	Myof						Q811M5	Serping1	P24268;A0A8I6AKF2;A6HY43;A6HY44;A6HY45;F7F3R8;Q6P6T6	Ctsd	P70627;A0A8I6ABM7;A6I5Y1;G3V7S0	Folh1	A0A8I6AWI1;A0A8I6B3G2;D4A7X9	Myo1f	Q64319;A6H9H4	Slc3a1
100	Q03336	Khk	D4A7L6	Ncam1 Ncam Rpia						Q6MG73	Sod3	Q9R066;A0A8I6AST4;A6JL34;A6JL35	Cxadr	P10868;A6K8N3;A6K8N4;G3V960	Gamt	A0A0G2K695;A0A8I5ZNP5;A0A8I6AE02;A0A8I6GC82;D4ACN7	Myof	P53790;A0A125RL27;A0A8I6AKD1;A0A8I6ALY2	Slc5a1
101	A0A0G2JSK9	Kmo	Q499V1	Ncf1						D4A2H2	Sptlc1	P00173;A0A8I5ZZA5;A0A8I6A1N0;A0A8I6A321;A0A8I6A7X5;A0A8I6A8N4;A0A8I6AM61;A0A8L2QAA3	Cyb5a	Q63663;A0A9K3Y7W5;Q5PQW8	Gbp2	Q5KTC7	Naaa	A0A8I6A218;D3Z9E5	Slc5a8
102	Q642A4	LOC298111	P13596	Niban1 Fam129a Niban						A0A0G2K2M9	Srrm2	P04166;A0A8L2Q7E2;A0A8L2R080;A6IYZ3;A6IYZ4;A6IYZ5	Cyb5b	A0A8I5ZN89;A0A8I5ZUK9;D3ZT90	Gcdh	Q9Z2G8;A0A8I6A4K3;A0A8I6A6I2;A0A8I6AE93;A0A8I6AKV9;A0A8I6GEN3;G3V6H9	Nap1l1	Q62687;A0A8I5ZTR9;A0A8I6AA48;A6JUW9;A6JUX0;A6JUX1;A6JUX2;A6JUX3;G3V847;Q5XIV7	Slc6a18
103	P70552; D3ZF77; D3Z9E5	Mapt	Q63692	Nomo1						Q5EBC0	Ssrp1	Q6AY12;A0A0G2KB07;A0A8L2QFU7;A6I7S6	Cyb5r2	P07314;A6JKI9;A6JKJ2;A6JKJ6;M0R8W8	Ggt1	P13596;A0A0G2K0M8;A0A8I5ZLW8;A0A8I5ZQ32;A0A8I6ACD2;A6J4C3;A6J4C4;A6J4C5;A6J4C6;F1LNY3;F1LUV9;Q04017;Q3T1H3	Ncam1	Q5RKI7	Slc7a13
104	Q80W57; Q6TUH3	Me1	P11730;P15791	Nsdhl						Q5PPJ6	Tf	P10633;A0A0G2JSU8;A0A0G2K0N7;A0A8I5ZLX8;A0A8I5ZWE8;A0A8L2QP93	Cyp2d1	Q63060;A0A0G2K785;A0A0G2KA23;A0A8J8YI12;D3ZCI0	Gk	A0A0G2JUF9;A0A8I6AH32;D3Z8V4	Nckap1l	Q920G2;A0A8I5ZPM4;A0A8I6A0E3;A0A8I6ANC3;A6HCU6;A6HCU7;G3V6D9	Slc9a3r2
105	D3ZT90	Mep1a	P52296	Nucb2 Nefa						M0R402	Tmx3	P10634;A0A0G2JYL2	Cyp2d2	Q0VGK3	Glyctk	Q9JI85;A0A8I6GHJ0;A6I8F0;A6I8F1;A6I8F2;A6I8F3;A6I8F4;G3V8R1	Nucb2	P46720;A0A8I5ZY22;A0A8L2QM78	Slco1a1
106	Q4V8F9	Mep1b	Q4QQV0	Numa1						D3ZXS8	Ube2k	P05182;A0A0G2K5X9;A0A8I5ZS79;A0A8I5ZXI6;A0A8L2Q8J4;A6HXJ0;A6HXJ1;A6HXJ2;A6HXJ3;A6HXJ4;Q71US7	Cyp2e1	P13255;A6JIM7;A6JIM8;M0RDH0	Gnmt	A0A8I5ZZ00;A0A8I6A4C2;D4A0M2	Nxn	P18297;Q63532;A0A8I5ZU80;B2RYK3	Spr
107	Q8K4B7	Mif	G3V7W1	Ola1 Pdcd6 Alg2						A0A0G2K7P6	Ube2o	P84850;A0A8L2R544;B2GV75	D2hgdh	Q3KRC4;A0A0G2K9B8;A0A8I5ZNK1;A0A8I6ATM9;B6ID02;F1LRW5	Gprc5c	A0A8I5ZLL0;A0A8J8XBZ3;Q5U2U3	Parp3	P13086;A0A0H2UHE1;A0A8I6A4L2;A0A8I6AAD9;A0A8I6AQ32;A6IAE0;A6IAE1;A6IAE2;A6IAE3	Suclg1
108	Q9EPT8	Misp3	P47942	Pa2g4						P51886	Vps8	Q920P0;A6HLI7;A6HLI8;A6HLI9	Dcxr	A0A8J8XIM5;B0BN46	Grhpr	A0A8I6A461;B5DEI0	Pcyox1l	Q07116;A0A8I6ABF6;A6KSG5;G3V6R5	Suox
109	Q6UPE0	Mlycd	P09495	Pcna						Q3KR94	Vtn	O08557;A6HWC2;A6HWC3	Ddah1	P46413;A0A8I6AYD3;A6KI43;A6KI44;A6KI45	Gss	Q9JID1;A0A8I5Y727;A0A8L2QAG2;B3DM93	Pdcd4	A0A0G2K0L8;A0A9K3Y6P4;Q66HF6	Tinag
110	Q9Z0T0	Mt1	Q99ML5	Pcyox1 Clp55 Psme2						D3ZA31	Yipf3	P80254;A0A0F7RQJ6;A6JKH4	Ddt	P24473;B6DYQ0	Gstk1	P52944;A6JH56;A6JH57	Pdlim1	Q4KLZ6;A0A8I6AF41;A0A8I6AR90	Tkfc
111	Q6UPE1	Mthfd1	Q9JI85	Pdia6 Cabp1 Txndc7								P48675;A0A8I6ANC1;A6JW26;Q6P725	Des	P04905;A0A8I6AIM5;A0A8I6G8J9;G3V983	Gstm1	P36202;A0A8I6GEQ8;M0R4H5	Pdlim4	Q91ZW6;A0A8L2QMT7;A6KR34	Tmlhe
112	P46844	Myo7a	Q5PPL3	Plec								A0A8I5ZNH0;A0A8I6AKI1;G3V978;Q5M7U4	Dhrs11	P57113;A0A0G2K6H2;A0A8L2QW65	Gstz1	Q5U318;A0A8I6AA10;A0A8L2QXM0;A6JG34;A6JG35;A6JG36	Pea15	Q9Z0T0;A0A0G2K2B6;A0A8I5ZSG8;A6I594;B0BMT6;Q7TP19	Tpmt
113	Q5RJN0; Q6SKG1	Myo7b	D3ZV82	Plec Plec1								Q8VID1;A0A8I5ZUW8;A6KGZ7;A6KGZ8	Dhrs4	P06760;A0A8I5ZZP5;A6J0N6;A6J0N7;F1LQQ8;Q7TPJ3	Gusb	P62963;A0A8I6AKB2;A6HG80;A6HG83;A6HG86	Pfn1	Q03248;A0A8I6AH71;A6JKL1;A6JKL2;D3Z8J1	Upb1
114	O89049;Q9Z0J5	Nat8f1	A0A0G2K695;D4ACN7	Plod2								M0R4N4;Q6I7R1	Dhrs7l1	Q9WVK7	Hadh	P15083;A0A0G2K5U5;F1M7H2	Pigr	Q7TQ16	Uqcrq
115	F1LQI1	Nat8f5	A0A097BW25	Postn Postn_predicted rCG_49960								Q4KLP0;A0A8L2UN65	Dhtkd1	Q64428;A0A8I6A8P4	Hadha	A0A8I5Y241;A0A8I6GE94;A6JJ35;A6JJ36;Q5M7T7	Pla2g7	A0A8I6A6F6;D3Z8F1	Vill
116	D4A3V2	Ndufa6	B2RYP6;G3V9R0	Prelp								Q01205;A0A8I5XWB5;A0A8I6ACB9;A6JE02;A6JE03;A6JE04;D0VYQ0;G3V6P2	Dlst	Q60587;A0A0G2K330;A0A8I6AP13;A6HAE1;A6HAE3	Hadhb	Q5FVH2;A0A8I5ZPG5	Pld3
117	A0A0G2JVL6;F7EXQ7; P01946	Ndufa8	G3V7I3	Pxdn								A0A0G2K4Y1;A0A0G2K5E4;G3V6I5;Q2TVU3;Q2UZS7	Dnaja3	A6J7V3;B2RYT7	Hdhd3	A0A8I6A8P9;B1WBV8;G3V904	Pld4
118	F1LPG5	Ndufb4	D4AE96	Rack1 Gnb2l1								A0A0G2QC19;A0A8I6GBG8;Q5RJL8	Dnajc21	A0A9K3Y6Z3;B4F7C7	Hebp1	P30427;A0A0G2JY63;A0A0G2JYZ5;A0A0G2K5T2;F7F9U6;Q6S395;Q6S396;Q6S399;Q6S3A0;Q6S3A3;Q6S3A4;Q6S3A5	Plec
119	B5DEL8	Ndufs5	Q5XIG8	Rars1 Rars								P21704;A6K4T9;Q924T1	Dnase1	Q5XIE6;A0A8I5ZL23;A0A8I6A0J8;A6INV5	Hibch	A0A8I6APP3;D3Z9K4	Plekho2
120	M0RC77	Ndufs7	Q6AXR4	Rcn3								Q9QZK8;A0A8I6ASI3;A6IY62	Dnase2	B5DFK5;F1LML7;Q99PW9	Hip1r	Q63321;A0A8I5ZPY4;A0A8I6GFD5;A0A8I6GH39;A6IU34;D3ZQ74	Plod1
121	P17425;P22791	Neurl1	Q9ESN0; Q63341	Rdh11								Q62952;A0A8I6AUS8;A6J3L6;A6J3L7;A6J3L8;A6J3L9	Dpysl3	Q71RP1;A6K5Y6;A6K5Y7;A6K5Y8;F1M581	Hpse	O54747;A6JAQ5;A6JAQ6;A6JAQ9;A6JAR0;G3V8M1	Pold1
122	Q4KLP0	Nherf2	Q4KM60	Rpl10a								P70583;A6HPW5;A6HPW6	Dut	P97852;A0A0G2JYU4;A0A8I5ZS89;A0A8I6G270;A0A8L2QCC3;A6IX04;A6IX06;Q6IN39	Hsd17b4	A0A097BW25;A0A0G2K692;A0A8I5Y5Q6;A0A8I5Y6L2;A0A8I6AHK0;A0A8I6AK89;D3ZAF5	Postn
123	P57093	Nit1	D3Z941	Rpl11								A0A0G2K7B6;A0A8I5Y164;A0A8I5ZKH0;A0A8I5ZKQ3;A0A8I5ZVI7;A0A8I6GEZ7;A0A8I6GM91;D4A6X1	Dysf	Q6MGB5;A0A0G2K156;A0A0G2K6P1;A0A0U1RRY9;A0A8I6A8H9;A0JN14;A6JJF2;A6JJG1;A6JJG2;A6JJG3;A6JJG4;A6JJG5;A6JJI3;A6JJI8;F7EQJ2;Q5BJM1;Q5U2N9;Q6MGB2;Q6MGB8;Q6MGB9;Q6MGC2;Q6MGC3;Q6MGC5;Q6MGC7;Q6MGC8;Q6MGC9;Q6MGD2;Q99JC6;Q9JHM2	Hsd17b8	Q9Z0V5;A0A8I5ZQ96;A0A8I6AAQ6;A0A8I6AER1;A0A8I6AL33;A0A8L2Q1B0;A6IPQ9;A6IPR0;A6IPR1	Prdx4
124	G3V874	Nqo2	A0A0G2K8M3;D3Z8G7	Rplp0 Arbp								Q62651;A0A8L2QF26;A6J9L4	Ech1	Q4V8F9;A0A8I5ZUC6;A0A8I6AF67;A0A8L2QRI7	Hsdl2	Q9EQP5;A6IC96;A6IC98	Prelp
125	P22791	Osbpl8	O54947	Rps10								Q3MIE0;A0A0G2JY01;M0RDR1	Echdc3	F1LZJ4	Hyi	Q4KM35;A0A8I6AFJ4;A0A8I6AKB6;A0A8L2UK72;A6IYU3;A6IYU4;G3V8J3	Psmb10
126	P13086	Pck1	Q5XI73	Rps2								A0A0G2K2R5;A0A0G2KAI7;A0A8I5Y8F2;A0A8I5ZL36;A0A8I5ZU12;A0A8I5ZYG7;A0A8I6GJS4;A6HZ65;A6HZ66;F7FBE9;Q5XI84	Efemp2	A0A8I5Y5E0;D3ZUX1	Hykk	P28064;A0A023IKD2;A0A023IKI3;A0A023IM45;A0A023IMI6;A0A0G2K5L5;A0A8L2Q0A4;A6JJE2	Psmb8
127	P18297	Phyh	Q6AYF8	Rps21								Q4FZY0;A6ITX5;A6ITX6	Efhd2	Q711G3;A0A8I6GHI0;B5DER3	Iah1	P28077;A0A023IKC9;A0A023IKG5;A0A023ILN9;A0A8I6AMP2;A6JJD3;A6JJD5;A6JJD8;A6JJE4;P97949;Q6MG98;Q6MGA0;Q6MGA6;Q9TQA6	Psmb9
128	Q9WTW7	Pm20d1	Q04462	Rps3								Q641Z6	Ehd1	D4ADG2	Iba57	Q63797;A0A8I5ZQ53;A0A8I6A5D1;A0A8I6AU10;F7F0J8;Q6P9V7	Psme1
129	P30904	Podxl	Q4G075	Rpsa Lamr1								A0A8I6AGS7;D3Z9E1	Emilin1	Q3KR86;A0A0G2JVH4;A0A140TAG5;A0A8I5Y0P8;A0A8I6A9C1;A0A8I6ADG3;A0A8I6GLJ1;A6IA90;A6IA91	Immt	B0BNK4;F7FFM6	Pstpip1
130	B3DMA2	Prodh2	O88941	Rrbp1								A0A0G2K2Z0;A0A8I5Y0M9;A0A8I6A8G5;A0A8I6ALM1;F1LT71	Eml4	D3ZNJ5	Inmt	P81718;A0A0G2K064;A0A0G2K163;A0A8I5ZT59;A0A8I5ZTX8;A6ILJ4;A6ILJ5;G3V9T9;Q499N7	Ptpn6
131	D3Z8I7	Pyroxd2	P07150	Rusf1								D3ZIP8	Endod1	Q9QYE7;A0A8I5ZWP3;D3ZWZ1	Itgax	P04157;A0A8L2PZM8;A0A8L2QFX7;A0A8L2QGD4	Ptprc
132	P29418	Rgn	B2RYI2	Ruvbl2								A6JTV7;Q3V5X8	Endog	P12007;A0A8I5ZKU7;A0A8I6A3D0;A6HPD2;A6HPD3	Ivd	A0A0G2JWB6;A0A0G2KAH2;A0A8I5ZV72	Pxdn
133	P43427	Sardh	D3ZCT7	Sec23b								P07323;A0A8I5ZMA1;A0A8I6A5I1;A0A8L2Q241;A0A8L2Q2X9;A6ILK0;A6ILK1;A6ILK2;A6ILK4	Eno2	Q5BK17	Iyd	Q6AY23;A0A8L2Q0U6;A6JGI1	Pycr2
134	D3ZPV0	Sbspon	A0JPJ7	Sec61a1 Sec61a								A0A0G2K1Q9;A0A8I5Y1G9;A0A8I5ZSB9;A0A8I5ZVK0;A0A8I5ZZJ7;A0A8I6AAL7;A0A8I6AUN0;A3E0T0;A6KF70;F7FPP7;G3V874;Q9JMB3	Epb41l3	A0A096MJZ8;A0A0G2JTU9;A0A0G2K454;A0A8I5ZPK6	Kdm5a	A0A023IKC9;A0A023IKG5;A0A8I6AUC1;A6JJD3;A6JJD5;A6JJD8;A6JJE4;P97949;Q6MG98;Q6MGA0;Q6MGA6;Q9TQA6	RT1-Da
135	P31430	Scrn2	B3GNI6	Septin11 Sept11								Q5XII0;A0A8I6ADM5	Epdr1	Q58FK9;A0A8I5ZUT0;F1M572	Kyat3	Q63942;A6JNV0;A6JNV4	Rab3d
136	A0A0G2JSP9	Sfxn1	P63326	Septin2 Sept2 Vesp11								Q9Z1Z3;A0A0G2JXY9;A6HF84;F1LQ45;Q505I9	Epn2	A0A8I6A287;D3ZVS2	L2hgdh	A0A8I6A1P8;A0A8I6G820;A6HSL3;F7EM94;Q5U1Y2	Rac2
137	P43428	Sfxn3	D3ZPI8	Septin4 Arts Bh5 Gm11492 Pnut12 Sep4 Sept4								A0A8I5XWE3;F7DLY1	Eps8l2	A0A0G2K1W9;A0A8I5Y6D8;A6IZ96;A6IZ97;A6IZ98;A6IZ99;Q7TPJ4	Ldhd	D3ZUB0	Rcn1
138	P51574	Slc15a1	C0JPT7	Septin7 Cdc10 Sept7								Q9JJ22;A0A0G2K2Y3;A0A8I5ZYK5;F7F4R3;Q4KMA8	Erap1	Q792I0;A0A8I5Y1R3;A0A8I6APQ4;A6HP07	Lin7c	I6L9G5;A0A0G2K022	Rcn3
139	Q5M876	Slc15a2	Q10758	Septin9 Sept9								Q63618;A0A8I5ZQJ8;A0A8I6ARF5;A6IUH0;A6IUH2;F1LQ34	Espn	Q924S5;A0A8I6AS66	Lonp1	A0A8I6AS52;D4A7L6	Rpia
140	Q9WTQ2	Slc16a4	Q5M8C3	Serpina4								Q9Z1X1;A0A0G2JXJ7	Esyt1	Q07014;A6JFK8;A6JFK9;A6JFL0;A6JFL1	Lyn	P62859	Rps28
141	P45953; P29975	Slc22a2	Q9QZR6	Serpinb1a								A6J903;B0BNJ4	Ethe1	Q8K4G6;A0A0G2K5F1;A0A8I5ZTN4;A0A8I6AN55;G3V8V6	Macrod1	P62909;A0A8I5ZK30;A0A8I6A8D6;A0A8L2QCG7	Rps3
142	P53790	Slc23a1	P68101	Serpinb6a								M0R7F6	Etnppl	P0C5W1;A0A0H2UHQ3;B5DFH2	Map1s	A0A8I5Y641;A0A8I6A1S1;A0A8I6ALA2;A0A8I6AS70;F1M853	Rrbp1
143	Q68FT3	Slc25a11	D3ZD23; Q5PPJ6	Serpinb8								Q6AYQ8;A6HCX6	Fahd1	P30009;F1LMW7	Marcks	P05943;A0A8I5ZKK6;A0A8L2QLC5;A6KMM0;B3Y9H3	S100a10
144	D3ZUX1	Slc2a5	Q9EQP5	Serpinb9								B2RYW9;A0A8I5ZMZ1;A0A8I5ZQK0;A0A8I5ZZS1;A0A8L2Q9F8	Fahd2a	P18298;A0A8I6A2G3;A0A8I6A819;A0A8I6ALA1;F1LRB8;Q6P688	Mat2a	A6J6P2;B0BMX3	S100a16
145	D3ZW47	Slc34a3	A0A0G2JTX7;F1LZF4	Serpinf1								F1LYQ8;A0A8I5ZQU0	Farp1	Q9EPF2;A0A8I6AFJ0;A6J3W0;A6J3W1	Mcam	P50116;A0A0H2UHJ1;A6J6Q4	S100a9
146	Q63342	Slc3a1	Q07014	Skic3 Ttc37								A0A8I5ZJQ3;A0A8I6A720;A6IB94;A6IB95;G3V6X1	Fbln2	Q5XIT9;A0A8I5Y1R2;A0A8I5ZSP4;A0A8I6A3M2;A0A8I6G9M3	Mccc2	P42667;A0A8I5XVF9;A0A8I6GE40;A0A8J8Y776;Q6P9X2	Sec11a
147	A0A0G2JUZ5;D4A5Q9	Slc5a1	Q66X93	Snd1								A0A8I6A897;A0A8I6G7Y9;A6HPW8;A6HPX0;G3V9M6;Q9WUH8	Fbn1	A0A8I5YC26;A0A8I6A417;A0A8I6AMQ5;A0A8I6G1P2;D4A197	Mcee	Q4G075	Serpinb1a
148	Q5RKI7	Slc5a8	F1M853	Srm								B2GVB9	Fermt3	O88989;A0A8I6A721;A6JQ40;A6JQ41	Mdh1	P29457;A6I6G7;A6I6G9;Q5RJR9	Serpinh1
149	Q02974	Slc6a18	P69060	Srp68								P14480;A0A8I6A9U0;A0A8L2UIC0;A6J5V1;A6J5V2	Fgb	P04636;A0A8I6ABC9;Q0QF43	Mdh2	A0A8I6A0F7;A0A8I6GI35;D4ADE5	Setd7
150	Q6AY80	Slc7a13	E9PTG8	Stk10 Txnl1 Trp								P02680;A6J5U7;A6J5U8	Fgg	P13697;A0A0G2K1S6;A6I1V2;F1LQQ1	Me1	B2RZ27;F7FNU3	Sh3bgrl3
151	P41565	Slco1a1	Q5U300	Strap Unrip								A0A0G2JZ38	Fhod1	A0A8I5ZT17;A0A8I6AD95;D4A1K4	Misp3	B1WC67;F7EXY7	Slc25a24
152	Q8CHM7	Spr	Q9WVC0	Tars1 Tars								A0A8I5Y6H8;A0A8I5Y7V6;A0A8I5ZV49;A6KRS3;C0JPT7	Flna	Q920F5;A6IZI5	Mlycd	Q9JJ09;A0A0H2UHZ0;A0A8I5ZXN1;A0A8I6AQW9	Slc34a2
153	Q9R0W2	Suclg1	Q920J4	Tbl2 LOC686610								D3ZHA0;A0A0H2UHR7;A0A8I5ZMA0;A0A8L2R384	Flnc	P97532	Mpst	Q63016;A6IZQ4	Slc7a5
154	P14942	Suox	D3ZCT7; B1WC21;D3ZQ25	Tjp3								Q9EQ76;A0A0G2JSI0	Fmo3	A0A0G2K583;A0A8I5ZXI1;Q7TP15	Mtap	A0A8I6GLN6;D3ZWC6	Sntb1
155	D3ZKD9;D4A1Q2;F1LST4	Tinag	Q5I0G4	Tm9sf4								Q8K4B7;A0A8I6AMY0;A6IDA1;A6IDA2;G3V6F2;Q8K4B6	Fmo4	A6IKE5;Q5XIG9	Mtfp1	P08721;A0A8L2QZH3;A6K5R7;A6K5S2	Spp1
156	Q0VGK3	Tkfc	Q9Z1P2	Tnc								Q8K4C0;A0A0G2JSQ2	Fmo5	P27653;A0A8I5ZJK8;A0A8I5ZXQ9;A0A8I5ZYX2;A0A8I6G8Q3;A0A8I6GID7;A6HCA0;A6HCA1;G3V6S5;Q5EBC3	Mthfd1	P52631;A0A8I6GJJ3;A6HJ64	Stat3
157	Q920G2	Tmlhe	P49301	Tpm4								P04937;A0A096P6L8;A0A8I5ZXR2;A0A8I6A5M1;A6KFG4;A6KFG5;A6KFG6;A6KFG7;A6KFG8;F1LST1	Fn1	D3ZKG1	Mut	A0A0G2K2M3;O70429;Q1KQ07	Stat6
158	Q5U1W6	Tpmt	P48679	Tra2b Sfrs10								P85845;A0A0G2KAM4;A0A8I5ZKQ7;A0A8I6AK10	Fscn1	F1M707;A0A096MJP6;A0A8I5ZYB6;A0A8I6ANL5;Q811Y3;Q99M65	Ncf1	E9PTG8;A0A0G2K7Z9;A6HDF4;A6HDF5;A6HDF7;H9KVF6	Stk10
159	A0A0G2K3E7;V9GZ80	Trim16	Q1JU68	Trim25								P43428;A0A8I6GJ57;A6HJB1	G6pc	A0A8I5ZKJ3;D3ZS58	Ndufa2	Q5XFX0;A0A8I5ZQ04;A0A8I5ZRB4;A6JG60;A6JG61	Tagln2
160	O89049	Txnrd1	P30009	Trim28 Kap1 Tif1b								B0BNM9	GLTP	A0A8I6AES7;A6K8N5;A6K8N6;A6K8N7;A6K8N8;A6K8N9;F7ELE5;Q5RJN0	Ndufs7	P36372;A0A023IKC9;A0A023IKD8;A0A023IKG5;A0A023IKJ0;A0A023IKJ3;A0A023ILP9;A0A023IM48;A0A023IMI8;A0A023IMI9;A6JJD3;A6JJD5;A6JJD8;A6JJD9;A6JJE0;A6JJE4;P97949;Q63522;Q6MG98;Q6MGA0;Q6MGA3;Q6MGA6;Q9TQA6	Tap2
161	F1M6X5	Txnrd2	A0A0G2K7H6;D3ZHB5	Ttll12								Q66HG4;A0A8L2Q447;A6H9S6	Galm	A0A8I6ALF5;A6HYR3;F7EQG5;Q5XIH3	Ndufv1	P49430;A6IET4	Tbxas1
162	Q7TQ94	Upb1	P62997	Tubb6								Q63663;A0A9K3Y7W5;Q5PQW8	Gbp2	P19234;A0A8I5ZXA6;A6JRE1;A6JRE2;A6JRE3	Ndufv2	Q2LAP6;A0A8I6AV73	Tes
163	Q5M9I5	Uqcrh	Q811A3	Uba1 Ube1								P70552;A0A8L2Q831;A6HPE2	Gchfr	Q63369;A0A8I5ZTP7;A6HVY5;A6HVY6;A6HVY7	Nfkb1	Q6AY25;A0A8L2QAC1;A6I205	Tmed3
164	P15650	Uqcrq	P48675	Uba2								P19468;A0A8I5ZU55;A6I1G6;A6I1G7;A6I1G8	Gclc	Q99P39;A6KI89;A6KI90;M0RAW3;Q3MHT2;Q5FWU2	Nfs1	D3ZJV9	Tmed6
165	D4A2R6	Usp40	Q9EPF2	Umps								P48508;A6HVF9;Q71S94	Gclm	A0A8I5ZW49;A0A8I6AAU8;A0A8I6ALY8;A6IKI3;A6IKI4;A6IKI5;A6IKI6;A6IKI8;A6IKI9;G3V728;Q5EBA4	Nipsnap1	Q5I0E7;A0A8I6AAI6;A0A8L2UKN3;A6KAQ7	Tmed9
166	P02091	Vill	P05765	Vars1 Vars Vars2								Q63042;A6HCV4	Gfer	Q7TQ94;A0A8I6AHC1;A0A8L2Q1A7;A6JFY4	Nit1	P04692;A0A096MIT6;A0A0G2JX64;A0A0G2K7F7;A0A8I6A156;A0A8I6GC15;A0A8J8YA57;A0A8L2UK34;A0A9K3Y6T5;A6KEY1;A6KEY3;A6KEY4;A6KEY5;A6KEY7;A6KEY8;A6KEY9;A6KEZ0;A6KEZ2;A6KEZ3;A6KEZ4;A6KEZ5;A6KEZ6;F7FIS4;Q63607;Q6AZ25;Q91XN6;Q91XN7;Q923Z2	Tpm1
167			P62909	Vat1								D3ZPV8	Ggct	Q497B0;A0A8I5YCH4;A0A8I5ZM02;A0A8I6A112;A0A8L2QJE6;A6IQN1	Nit2	Q4QRB4	Tubb3
168			F1M9B2	Yars1 Yars								A0A0G2JUZ5;A0A8I6AP64;A0A8I6AWV3;D4A5Q9	Gldc	A0A8I6A0P0;A0A8I6AC81;A0A8I6ADT1;A0A8I6ALS9;A0A8I6AQG5;Q5BJZ3	Nnt	P69897;A0A8L2RA69;A0A9K3Y7B8;A6KT85;A6KT88;Q6MFZ8;Q6MFZ9;Q6MG00;Q6MG01;Q6MG05;Q6MG10	Tubb5
169												P10860;A0A8I6AGI7;A6KFS4;A6KFS5	Glud1	D3ZYK9	Npm3	A0A8I5ZT08;A6IXU7;Q4QQV0	Tubb6
170												P04897;A0A8I6AKS3;A6I2Z9;Q45QN0;Q5EEY3;Q5EEY4	Gnai2	Q499U6;A0A0G2JSX1;A0A8I6A8T8;A0A8L2R4J4	Nsmce1	A0A8I6APN3;A0A8I6GKN1;D3ZZC1	Txndc5
171												O35353;A0A0G2K8M9;A0A8I5Y5X0;A6IHP7;A6IHP8;D4A752;Q45QL2	Gnb4	P97608;A0A8I5ZZD3;A0A8L2Q8T4;A0A8L2R932;A6HS77	Oplah	Q3MIE4;A6HJC8	Vat1
172												O35077;A0A8I6AA38;A6KCH1;A6KCH2	Gpd1	B2GV06;A0A8I5Y5J4;A0A8I6A9X8;A0A8L2UNL5	Oxct1	P31000;A6JM43;A6JM44;A6JM45;A6JM46;G3V8C3	Vim
173												P23764;A6HEJ3;A6HEJ6	Gpx3	Q9EPH8;A0A0G2JZS2;A0A8I6B3K1;A0A8I6G441	Pabpc1	Q642A6;A6IUS2	Vwa1
174												A0A096MJ11;A0A8I6B2B6	Gsdmd	Q920Q0;A0A8I6AJZ7;A0A8I6AUR8;A0A8I6G597;A6K8X0	Palm	Q62764;D4A0L4;F1MA18	Ybx3
175												P70619;A0A0G2JU71;A0A8I6A0A3;A6IVS9;F1LRE1	Gsr	A0A0G2K950;B5DFH4	Papss2	P68511;A0A0G2K2B8;A0A8I6AI74;A6IK71;A6IK72	Ywhah
176												P04905;A0A8I6AIM5;A0A8I6G8J9;G3V983	Gstm1	P14882;A0A0G2K401;A0A0G2K5P9;A0A8I5YBZ6;A0A8I5ZL37;A0A8I5ZVD4;A0A8I5ZWE0;A0A8I6A8G9	Pcca
177												Q9Z339;A0A8I5ZZS8;A0A8I6B2N7;A6JHR8;A6JHR9;Q6AXR6	Gsto1	P07633;A0A8I5ZYQ5;A0A8I6A8K8;A0A8I6A9J4;A6I2G1;A6I2G2;A6I2G3;Q68FZ8	Pccb
178												P30713;A0A8L2R9M6;A0A8L2UQ98;A6JKG6;B6DYQ9	Gstt2	P07379;A6KKZ5;A6KKZ6;A6KKZ7;A6KKZ8;A6KKZ9	Pck1
179												D3ZBN0	H1-5	P26284;A0A0G2JW90;A0A8I6GKV6;F7FKI5;Q4FZZ4	Pdha1
180												D3ZIX4	H1f10	A0A096MJ84;A6IPZ9;B5DFI9	Pdk3
181												P46953;A0A0G2JSV5;A0A8I5ZR59;A0A8I6ASE6;A0A8I6GEE8;A6H9K8;A6H9L0;A6H9L1;A6H9L3	Haao	O35331;G3V647	Pdxk
182												Q8CHM7;A0A8I6A4D4;A0A8I6ACR4;A0A8I6AE81;A0A8I6G9A1;A0A8I6GIV8	Hacl1	Q923S2;A0A8L2Q5J1;A6JZ31;A6JZ32;A6JZ33;A6JZ34	Pdzk1ip1
183												O35952;A6HCX7;F1LQI1	Hagh	Q9WVK3;A0A0G2JUF1;A0A0G2JVG4;A0A0G2K6H4;A0A8I6ATH4;A6KFH7;A6KFH8;A6KFH9;A6KFI0	Pecr
184												B0BNF9	Hao1	P38652;A0A8I5ZRI9;A0A8I6AV00;A1A5L2;A6JRM5;Q499Q4;Q62752	Pgm1
185												F7F5Q9;Q68FX4	Hcls1	P67779	Phb
186												A0A8I6AF96;B5DFM0;F1LSK5	Heatr5a	P12928;A0A0H2UI07;A6J6C1;B1WBN9	Pklr
187												P29266;A0A8I5ZVQ3;A0A8I6AQ40;A0A8L2Q4S5	Hibadh	D4ACD5	Plek2
188												P62959;D4A269	Hint1	F1M0Q9	Pm20d1
189												D4AB01	Hint2	D4A7X5	Ppm1k
190												A0A8I5Y6T0;A0A8I6AA26;A0A8I6GA90;A6J0C8;A6J0C9;A6J0D0;G3V8Y8	Hip1	O55232;D3ZVN7	Ppox
191												B5DFK5;F1LML7;Q99PW9	Hip1r	Q2V057;A6J9X8;A6J9X9;A6J9Y0;B0BNG1	Prodh2
192												P97519;A0A8I5ZY90;A0A8L2Q6E3;A6IT78;A6IT79	Hmgcl	Q63798;A0A8I6A5C7;A6KH15;A6KH16;A6KH17;A6KH18	Psme2
193												P22791	Hmgcs2	D4AE56	Ptges2
194												Q01984;A6JSX2;A6JSX3	Hnmt	Q62786;A0A8I6A8G3;A6K3H3;F1M790	Ptgfrn
195												F1LQ48;A0A8L2QEL3;A0A8L2QQ13;B5DFG2;F2Z3R2	Hnrnpl	P11348;A0A8I6ARI8;A0A8L2Q0Z9;A6IJL7;A6IJL8;A6IJL9;A6IJM0;A6IJM1	Qdpr
196												A0A8I6A2K2;A0A8I6AHX1;D4A2K1	Hoga1	D4A9W3	RGD1311756
197												O70351;A0A8I6AFS1;A0A8I6AJ41;A0A8J8XAP0;B0BMW2	Hsd17b10	P70550;A6KF00;B0BMV5	Rab8b
198												A0A8I6A691;A0A8I6A9B3;D3ZC55	Hspa12a	Q5U312;A0A8I5ZN94	Rai14
199												P41562;A0A8L2QA85;A6IPJ5;A6IPJ9;Q0QER8	Idh1	Q925G0;A0A8I5ZVH4;A6KP47;G3V6P6;Q5PPI5	Rbm3
200												P56574;A0A0G2JUF6;A0A8I5ZNR3;A0A8I5ZXJ8;A0A8L2UJA4	Idh2	P08424;A0A8I6ANY3;Q9JIE2	Ren
201												P41565;A0A0G2K4Q0;A0A8I6GDC1;A6KRV1;A6KRV2;A6KRV3;A6KRV4;A6KRV5;A6KRV6;Q5XIJ3	Idh3g	P52759;A0A8L2Q359	Rida
202												Q9QY78;A0A8I5ZJG2;A6IW60;A6IW61;G3V8H5	Ikbkb	Q4G069;A0A0G2K167;A0A8I6G831	Rmdn1
203												A0A8I5ZZI8;A0A8I6AF93;D4A4I9	Il16	A0A8I5ZNN3;A0A8I6AAZ0;A6JB30;G3V8T5;Q4QQS4	Ruvbl2
204												E9PU28;A0A8L2QJV6;Q6P9U9	Impdh2	Q64380;F1LRY5	Sardh
205												A0A8I6AJK7;B5DFH1;G3V7Q7	Iqgap1	Q9ET20;A0A8I6GHB8;A6K8I8;A6K8I9;A6K8J0;A6K8J1;A6K8J2;Q5EAN5	Scamp4
206												A0A8I6AM38;F1LW74	Iqgap2	Q6AY30;A0A8L2QQT2;A6JGF6	Sccpdh
207												Q6I7R3;A0A8I6GF98;F2Z3T7	Isoc1	Q68FT9;A0A8I6AR35;A6JQQ4;A6JQQ5;A6JQQ6	Scly
208												P18614;A0A8L2R8Q8;A6I5T3;A6I5T4	Itga1	Q6AYR8	Scrn2
209												A0A0G2K470;A6I5T2	Itga2	P21913;A0A8I5ZPQ5;A0A8L2Q4P2	Sdhb
210												A0A0G2K1E2;A0A8I5YCC9;A0A8I6A7G7	Itga5	Q6P734;A0A8I6A6T2;A0A8I6ABI1;A6HMR4	Serping1
211												A0A8I5ZTY9;A0A8I5ZVL1;A0A9K3Y824;B2RYB8;Q4KLK5	Itgb2	A0A8I6GHH3;B5DFD8	Sh3bgrl
212												B2RYM3;F7EYX4	Itih1	Q63424;A0A0H2UHA7;A0A8I5ZLE5;A0A8I6A6Q4;A0A8I6AL86;A6IRB4;A6IRB5;A6IRB6;A6IRB7;A6IRB8;Q5U401	Slc15a2
213												Q63269;A0A0G2K9N6;A6JJL0;A6JJL2;C7E1V1	Itpr3	Q9WTW7;A0A8L2R5A1;A6J2Y7	Slc23a1
214												D4A5J1	Kbtbd11	Q5PQM9;A6HTT5;F1LR53	Slc25a30
215												P62483;A0A0G2K670;A0A8I5ZVX6;A0A8I5ZYT6;A0A8I6APC7;A0A8I6GCY0;A0A8L2Q7L3;A6IUI6	Kcnab2	A0A8I6GJ25;D3ZL04	Slc25a45
216												Q02974;A0A8I6AMT1;A0A8I6G7X9;A0A8L2QMK2	Khk	Q09073	Slc25a5
217												M0R439	Klhdc7a	P43427;A0A0G2JT43;A0A8I5ZM52;A0A8I6A4B7;A6IUC8;A6IUC9;B1WBQ4	Slc2a5
218												O88867;A0A8I6AJ51;A0A8I6AUG8;A6JGB4	Kmo	A0A0G2JW25;A0A8I6AEN5;A0A8I6AVN8;A0A8I6G921;D4A237	Slc2a9
219												Q63279;A0A0G2JT54;A0A0G2JW58;A0A0G2JXJ9;A0A8I6A5I5;A0A8I6GIB2;A0A8L2Q9T0	Krt19	Q64319;A6H9H4	Slc3a1
220												Q10758;A0A8I6G4D8	Krt8	P53790;A0A125RL27;A0A8I6AKD1;A0A8I6ALY2	Slc5a1
221												F1LTF8	Lama4	P26433;A0A8I5ZZ59;G3V7Y7	Slc9a3
222												P42123;A6IMU4;A6IMU6	Ldhb	Q641Z7;A6K4D6;A6K4D7	Smpdl3a
223												P70615;A0A8I6ACW5;G3V7U4	Lmnb1	P07895;A6KP26	Sod2
224												A0A8I5ZMS1;A0A8I5ZPN1;A0A8I6A308;D3ZLC1	Lmnb2	A0A8I5ZV34;A0A8I6AHY6;A0A8I6AIH6;B1H270;F1LPV8;Q499V7;Q5EBA9;Q68FT4	Suclg2
225												G3V928;A0A8I6A0U0	Lrp1	Q07116;A0A8I6ABF6;A6KSG5;G3V6R5	Suox
226												Q66HF9;A0A8I5Y0X7;A0A8I5Y1S8;A0A8I5Y5U1;A0A8I5ZL04;A0A8I5ZPV3;A0A8I6A6Y5;A0A8I6GL21;A0A8L2QNX6	Lrrfip1	F7EVS3;Q566D9;Q587K3	Tbc1d10a
227												Q64361;A6J5L5;A6J5L6	Lxn	A0A8I5ZND3;G3V887;Q2I6B0;Q6P735	Tcirg1
228												Q07014;A6JFK8;A6JFK9;A6JFL0;A6JFL1	Lyn	Q4KLZ6;A0A8I6AF41;A0A8I6AR90	Tkfc
229												P70470;A0A8I5Y1L5;A0A8I5YBB3;A0A8I5ZTV1;A0A8I5ZYI9;A0A8I6APY4;A0A8L2Q511;A6JFJ3	Lypla1	A0A0G2K1L0;A0A8I6AG89;A0A8I6AIS3;A0A8I6ARC1;A0A8I6GHT4;B2LYI9	Tnc
230												P19643;A0A8I6A9K2;A6JZX1;Q99PC8	Maob	P41516;A0A0G2JUF8;A0A0G2JWP8;A0A8I6ADA9;A6HIW1	Top2a
231												P15205;A0A8I5ZMJ9;A0A8I5ZWW4;A6I568;A6I569;A6I570	Map1b	P09495;A0A0G2K2G8;A0A8I6ATZ5;A0A8L2QBT8;A6K9Q7	Tpm4
232												Q63560;A0A8I6ABK9;F1LQZ9	Map6	D4A1Q9	Ttll12
233												P19332;A0A8I5YBN3;A0A8I5ZN00;A0A8I5ZN17;A0A8I6ABX0;A0A8I6ARL1;A0A8J8XUY4;A0A8K1TMD4;A0A8K1TN53;A0A8K1WG57;A0A8K1WHA3;A0JN25;D3ZKD9;D4A1Q2;F1LST4	Mapt	P85834;A0A8I5ZXD5	Tufm
234												P30009;F1LMW7	Marcks	Q9Z0J5;A6JSG3;A6JSG4;F1M6X5	Txnrd2
235												Q9EPH2;A0A8I6AFB9;A6J9R3	Marcksl1	Q03248;A0A8I6AH71;A6JKL1;A6JKL2;D3Z8J1	Upb1
236												Q5I0C3;A0A8I6AQ31;A0A8I6AS47;A6IHW0;F1LP30	Mccc1	F7F0D5;Q499V1	Upp1
237												Q62724;A0A8I6A784;A6IBX2;A9CMB8;A9CMC9;B2RYL5	Mcm6	Q7TQ16	Uqcrq
238												Q9Z311;A0A140TAE6;A6ISQ8;A6ISQ9;A6ISR0	Mecr	A0A0G2K9C0;A0A8I6A7U4;A0A8I6AAX7;B5DEX4;F7EWC1	Vasp
239												P97523;A0A8I6GEH2;A0A9K3Y8B9;A6IE38;A6IE39;Q2IBC6;Q2IBC7;Q2IBC9;Q8VHF9	Met	A0A8I6A6F6;D3Z8F1	Vill
240												Q562C4;A6KSL1	Mettl7b
241												Q8R431;A0A0G2JYI5;A0A8I5ZPF3;A6IB48;A6IB49	Mgll
242												P07861;A0A0H2UHX5;A6JVN6	Mme
243												Q63341;A0A8I5ZTA4;A0A8I6AB53;A6JN29;R9PXT7	Mmp12
244												P38718;A0A8I6AS07	Mpc2
245												A0A8I5XVS2;D3ZD31	Mrc1
246												Q923M1;A0A8I6A0P8;A0A8I6AN14;A6K6H7;F1LSJ6;M0RCC8	Msra
247												Q4FZX5;A0A8I6A270;A6JMA1	Msrb2
248												Q62667;A0A140TAE0;A6I9J8	Mvp
249												Q6VBQ5;A6KS43;Q05BA4	Myadm
250												A0A8I6AWI1;A0A8I6B3G2;D4A7X9	Myo1f
251												P13596;A0A0G2K0M8;A0A8I5ZLW8;A0A8I5ZQ32;A0A8I6ACD2;A6J4C3;A6J4C4;A6J4C5;A6J4C6;F1LNY3;F1LUV9;Q04017;Q3T1H3	Ncam1
252												F1M707;A0A096MJP6;A0A8I5ZYB6;A0A8I6ANL5;Q811Y3;Q99M65	Ncf1
253												F1LXA0	Ndufa12
254												Q63362;A0A8I6A8X4;A6IE83;A6IE84	Ndufa5
255												D4A3V2	Ndufa6
256												A0A8I6A2J5;A0A8I6AEH1;A0A8I6AK05;A9UMV9;F7FE81	Ndufa7
257												Q5BK63;A0A8I6A3W0;A0A8L2R6R3	Ndufa9
258												D4A0T0	Ndufb10
259												A0A8I5ZPY8;F1LPG5;Q2XTA8	Ndufb4
260												Q66HF1;A0A8I5ZXM3;A0A8L2Q7K1;A6IPF5;A6IPF8	Ndufs1
261												A0A8I6AKU6;A0A9K3Y8A9;B5DEL8	Ndufs5
262												A0A8I6AL00;B0BNE6;F7FGW7	Ndufs8
263												A0A8I6G6F3;A6JHL8;Q5U2Z4	Nfkb2
264												Q9ESN0;A0A8I5ZNB0;A0A8I6GG41	Niban1
265												P86172;A0A0G2K5K3;A0A8I6G633;D3ZDB9	Nmral1
266												Q8K4G9;A6ID08;A6ID09;Q8CJD4;Q8CJD5;Q8CJD6;Q8CJD7;Q8CJD8	Nphs2
267												Q6AY80;A0A8L2QE49	Nqo2
268												A0A8I6AMK5;A6I6Z1;A6I6Z3;A6I6Z4;A6I6Z5;F1LW91;F7FF45;Q4G051	Numa1
269												D4ACK1;M0RBV9	Nup214
270												Q5XIG4;A0A8I5ZNM9;A0A8I5ZQT6;A0A8I5ZWR4;A0A8I6GM27;A0A8L2Q028;A6JD40;A6JD42;A6JD43;A6JD44;A6JD45;A6JD46;A6JD50	Ociad1
271												Q8K4M9;A0A0G2K327;A0A8I6GFS2;A6KLS5;A6KLS6;A6KLS7;A6KLS8	Osbpl1a
272												A0A0G2JXN8;A0A8I5ZMZ6;A0A8I6A2N1;A0A8I6ADC9;A0A8I6GDH8;B5DF26	Osbpl8
273												Q64375;A0A8I5Y629;D4ABF0	P3h4
274												Q9EPH8;A0A0G2JZS2;A0A8I6B3K1;A0A8I6G441	Pabpc1
275												D3ZCT5;Q498S3	Pald1
276												A0A0G2JW79;D4A1J3	Palm3
277												A0A8I5ZTF7;F1LZ05	Parp14
278												A0A8I5ZLL0;A0A8J8XBZ3;Q5U2U3	Parp3
279												P49432;A0A0G2KAM3;A0A8I6A8K3;A0A8L2Q513;A6K0B7	Pdhb
280												A0A0G2JZH8;A0A8I6ATI8;Q5BJX2;Q7TQ85	Pdhx
281												Q64536;A0A8I6AJH2;A6HI79;A6HI80;A6HI81;A6HI82;F1LMM8	Pdk2
282												Q9Z1Z9;A0A8I6AH90;A0A8I6AKU2;A0A8I6GK07;A0A8L2UJ95;A6KAR4;A6KAR6;A6KAR7;A6KAR8;A6KAR9;A6KAS0;A6KAS1	Pdlim7
283												O70597;A6JC69	Pex11a
284												P16290;A6IKP6;A6IKP7;A6IKP8	Pgam2
285												P70580;A0A0H2UHK2	Pgrmc1
286												Q5XIH7;A0A0G2KB63;A0A8I6GK88;A0A8L2Q8H9;A6ILJ3	Phb2
287												A0A8I6AKZ7;D3ZFJ0	Pik3cg
288												P10688;A0A8I5Y0I7;A0A8I6GIK0;A6I3V0;G3V9D1	Plcd1
289												P24135;A0A0G2JWA2;A6IZH5	Plcg2
290												P30427;A0A0G2JY63;A0A0G2JYZ5;A0A0G2K5T2;F7F9U6;Q6S395;Q6S396;Q6S399;Q6S3A0;Q6S3A3;Q6S3A4;Q6S3A5	Plec
291												Q9WV78;A0A0G2JZ75;A6K9V0	Plvap
292												A0A8I6AC37;A0A8I6ACX4;A0A8I6GKM3;F1M589	Pml
293												Q03346;A0A8I5ZQ98;A0A8I6GCU4;A0A8L2Q9B4;A6K5A6;A6K5A7;A6K5A8;A6K5A9;A6K5B0;A6K5B1	Pmpcb
294												O88794;A0A8I6GIN9;A6HIH6;A6HIH7	Pnpo
295												A0A097BW25;A0A0G2K692;A0A8I5Y5Q6;A0A8I5Y6L2;A0A8I6AHK0;A0A8I6AK89;D3ZAF5	Postn
296												D4A6X7;Q4KLH2	Ppcs
297												A0A8I5ZN96;A6IX31;F7FHM1;Q6AYQ9	Ppic
298												P29117;A0A8L2Q6S2;A6KMH2;A6KMH3	Ppif
299												A0A8I6A8D3;D4A5T8	Ppl
300												P97888;A0A0G2JWY9;A0A0G2K5X0;A0A8I6A1K8;A0A8I6GCS7;A6IJW8	Ppp2r2c
301												Q9R063;A0A0G2JSS8;A0A8I5ZR89;A0A8I5ZXJ7;A0A8I6A9W7;A6HZI8;A6HZI9;A6HZJ0;A6HZJ1	Prdx5
302												A0A0G2K2S1;F1MAR6	Prodh1
303												A0A8I5YBG7;A0A8I6AQ45;D3ZCA0	Prosc
304												P09330;A0A8L2Q1L2;A6K2F9;A6K2G0	Prps2
305												Q4KM35;A0A8I6AFJ4;A0A8I6AKB6;A0A8L2UK72;A6IYU3;A6IYU4;G3V8J3	Psmb10
306												P28075;A6KGV2;G3V7Q6	Psmb5
307												P28064;A0A023IKD2;A0A023IKI3;A0A023IM45;A0A023IMI6;A0A0G2K5L5;A0A8L2Q0A4;A6JJE2	Psmb8
308												Q63798;A0A8I6A5C7;A6KH15;A6KH16;A6KH17;A6KH18	Psme2
309												Q62786;A0A8I6A8G3;A6K3H3;F1M790	Ptgfrn
310												A0A8I6AKN3;A0A8I6ALM9;A0A8I6GLX5;D3ZHG3	Ptk7
311												O88902;A6I3E2;F1M951	Ptpn23
312												Q64604;A0A0G2JT62;A0A8I5ZVM7;A0A8I6G9U8;G3V8P4	Ptprf
313												P27213;A0A8I6A899;A0A8I6AM88;A6J4D3;A6J4D4;A6J4D5;A6J4D6	Pts
314												A0A0G2JWB6;A0A0G2KAH2;A0A8I5ZV72	Pxdn
315												Q68FT3;A0A8L2QB18	Pyroxd2
316												Q5I0M2;A0A8I5ZY87;A0A8I6G1S5;A6I9L4;A6I9L5;A6I9L6	Qprt
317												A0A8I5ZZD1;A0A8I6ALA4;D3ZDM4	RGD1310495
318												P29826;A0A023IKC9;A0A023IKG5;A0A0G2JX83;A0A8I6AKW6;A6JJD3;A6JJD5;A6JJD7;A6JJD8;A6JJE4;F7EQR2;P97949;Q5UT90;Q5UT95;Q5UT96;Q5UT97;Q6AYB1;Q6MG98;Q6MGA0;Q6MGA1;Q6MGA6;Q9TQA6	RT1-Bb
319												A0A8I6ANG9;A6JJE7;M0R8E5;Q6MGA7	RT1-DMb
320												Q9JIL8;A0A8I5Y858;A6HEE0;G3V9X6	Rad50
321												P61227	Rap2b
322												Q925G0;A0A8I5ZVH4;A6KP47;G3V6P6;Q5PPI5	Rbm3
323												P50170;A0A0G2K7A4;F7FHR5	Rdh16
324												Q03336;A6JZT8	Rgn
325												Q68FT6;A0A0U1RRR1;A0A8I6GHX9;A6J659	Rhbg
326												P62718;A0A8I6AM85	Rpl18a
327												A0A8I5Y641;A0A8I6A1S1;A0A8I6ALA2;A0A8I6AS70;F1M853	Rrbp1
328												Q5FVJ0;A0A0G2K6A9;A0A8I5ZLF4;A0A8I6AK59;A0A8I6ARF6;A0A8L2Q1K8;A0A8L2QAC6	Rufy3
329												D3ZS55	Sbspon
330												A0A8I6AMY4;A0A8I6GHZ4;D3ZYY0	Sdr39u1
331												F1MAS7	Sdr9c7
332												Q99MS0;A0A8I6ADK3;A0A8I6G5V9;A6IKE7;F7F3C3;Q5EBD0	Sec14l2
333												P17475;A0A0G2JSJ9;A0A0G2JY31;A0A0G2JZ73	Serpina1
334												Q9JHY2;A0A8I5ZKG3;A0A8I5ZY86;A0A8I6A2F4;A0A8I6AC71;A0A8W1ATD7;Q6P6T0	Sfxn3
335												A0A8I5XWT5;A0A8I6A7C4;B2RZ31;C6ZII9;F7EYD5	Sirt3
336												Q66HR0;A0A096MK93;A6J033;M0R3V5;M0RAK3	Slc12a9
337												P51574;A0A8I6AKI9;F1LMZ1	Slc15a1
338												A0A8I6AID2;A6HUT7;Q5U2P9	Slc16a4
339												Q63344	Slc16a7
340												Q62866;A6JKA5;Q5UD31;Q5UD32;Q9QYB9	Slc19a1
341												P51907;A0A8I6AVI3;A6I0U4;A6I0U5	Slc1a1
342												Q3ZAV1;A0A0H2UHT0;A0A8I5Y299;A6HZI0;A6HZI1	Slc22a12
343												Q9R0W2;A0A0G2JSP9	Slc22a2
344												P97700;A0A8I5YBI3;A0A8I6GIJ8;A6HG73;A6HG74;A6HG75;G3V6H5	Slc25a11
345												Q99JD3;A0A140TAF1;A0A8I6G9N8;A6HBP1	Slc25a21
346												P0C546;B1H271	Slc25a42
347												P97524;Q66HN6	Slc27a2
348												Q62674;A0A0G2JX14;A6JCE9;F1LNH7	Slc28a1
349												Q8K4R8;A0A0G2K7V6;A6JT18;A6JT20;G3V7E1	Slc34a3
350												A0A0G2JTZ7;D4A9C2	Slc35f2
351												Q9JHZ9;A6I304	Slc38a3
352												Q5I0E9;A0A8I5ZRP9;A0A8I6A976;A0A8I6AIL9;A0A8L2R9P7	Slc47a1
353												O70247;A0A8L2R3T7;B4F760	Slc5a6
354												A0A8I6A218;D3Z9E5	Slc5a8
355												P31646;A0A0G2K0Z3;R9PXV0	Slc6a13
356												Q62687;A0A8I5ZTR9;A0A8I6AA48;A6JUW9;A6JUX0;A6JUX1;A6JUX2;A6JUX3;G3V847;Q5XIV7	Slc6a18
357												Q5RKI7	Slc7a13
358												Q9JJ19;A6HKK8	Slc9a3r1
359												Q920G2;A0A8I5ZPM4;A0A8I6A0E3;A0A8I6ANC3;A6HCU6;A6HCU7;G3V6D9	Slc9a3r2
360												P46720;A0A8I5ZY22;A0A8L2QM78	Slco1a1
361												Q71MB6;A6JR53;F1LRH8	Slco4c1
362												P07632;A0A8I6G9Z6;A0A8L2Q0T2;A6JLB7	Sod1
363												A0A8I5Y5L8;A0A8I6ANW9;A6HTJ5;A6HTJ6;Q5XIL4	Sorbs3
364												P16975;A0A8I5ZWN9;A0A8I6ALJ7;A0A8I6GK51;A0A8L2Q9I7;A6HEL9;A6HEM4	Sparc
365												P18297;Q63532;A0A8I5ZU80;B2RYK3	Spr
366												P52631;A0A8I6GJJ3;A6HJ64	Stat3
367												E9PTG8;A0A0G2K7Z9;A6HDF4;A6HDF5;A6HDF7;H9KVF6	Stk10
368												P61765;A0A8I6A8W2;A0A8I6ABE0;A6JU89;A6JU90	Stxbp1
369												A0A8I6A1U8;B2RZ24;F1LM47	Sucla2
370												P13086;A0A0H2UHE1;A0A8I6A4L2;A0A8I6AAD9;A0A8I6AQ32;A6IAE0;A6IAE1;A6IAE2;A6IAE3	Suclg1
371												Q9WUW8;A0A0G2JUM0;A0A8I6ARK1;F1LNK1;F1LZI5	Sult1c2
372												Q29YR5;A0A8I6AAV2;A0A8I6AKI2	Sult2b1
373												B2RYT9;D4A601	Taco1
374												A0A8I6A9F9;A0A8I6AAL0;A0A8I6AJL5;D4A206	Tcof1
375												O08653;A0A0G2JT33;A0A8I5Y645;A0A8I5ZJN1;A6KEB2;A6KEB3;F1LPX8	Tep1
376												D4A2G6	Thbs2
377												Q5U2X7;A0A8I6A8J0	Timm21
378												D3ZEG8	Timm29
379												A0A0G2K0L8;A0A9K3Y6P4;Q66HF6	Tinag
380												Q5HZA9;A0A8I5ZU95	Tmem126a
381												Q5U4F4;A0A8I5ZW19;A0A8I6AMQ3;A0A8I6G425	Tmem135
382												D3Z946	Tmem70
383												Q91ZW6;A0A8L2QMT7;A6KR34	Tmlhe
384												A0A0G2K1L0;A0A8I6AG89;A0A8I6AIS3;A0A8I6ARC1;A0A8I6GHT4;B2LYI9	Tnc
385												D3ZF26	Tnks1bp1
386												P04692;A0A096MIT6;A0A0G2JX64;A0A0G2K7F7;A0A8I6A156;A0A8I6GC15;A0A8J8YA57;A0A8L2UK34;A0A9K3Y6T5;A6KEY1;A6KEY3;A6KEY4;A6KEY5;A6KEY7;A6KEY8;A6KEY9;A6KEZ0;A6KEZ2;A6KEZ3;A6KEZ4;A6KEZ5;A6KEZ6;F7FIS4;Q63607;Q6AZ25;Q91XN6;Q91XN7;Q923Z2	Tpm1
387												P09495;A0A0G2K2G8;A0A8I6ATZ5;A0A8L2QBT8;A6K9Q7	Tpm4
388												Q9Z0T0;A0A0G2K2B6;A0A8I5ZSG8;A6I594;B0BMT6;Q7TP19	Tpmt
389												A0A8I5Y9E0;A6IGL6;O55158	Tspan8
390												D4A1Q9	Ttll12
391												P69897;A0A8L2RA69;A0A9K3Y7B8;A6KT85;A6KT88;Q6MFZ8;Q6MFZ9;Q6MG00;Q6MG01;Q6MG05;Q6MG10	Tubb5
392												A0A8I5ZT08;A6IXU7;Q4QQV0	Tubb6
393												P97615;A0A8I6AIE6;A0A8L2R8B7;A6HSH0;A6HSH1;A6HSH4	Txn2
394												F7F0D5;Q499V1	Upp1
395												A0A8I6AL93;B2RYS2;K3W4V0	Uqcrb
396												Q68FY0;A6I395;A6I396	Uqcrc1
397												P32551;A0A8I6A888;A6I8R0;A6I8R1;A6I8R2;A6I8R3;A6I8R4	Uqcrc2
398												A0A8I5Y9F7;A0A8I5ZR66;A0A8I6A2P6;A6JBB6;Q4KMB9	Ush1c
399												G3V7L1;A0A0G2JW60;A0A8I5ZS09;A0A8I5ZYU2;A0A8I6AE90;A0A8I6AG96;A6JP48;O55147	Utrn
400												Q04462;A0A8L2UQS2	Vars1
401												Q3MIE4;A6HJC8	Vat1
402												P85972;A0A0G2K8V2;R9PXU6	Vcl
403												Q9Z2L0;A0A8I6AKF7;A0A8I6G9H8;A0A8I6GGP1	Vdac1
404												F7FPD6;Q4KLZ0	Vnn1
405												Q6IN36;A0A8I6G7Q9;R9PXW1	Wipf1
406												A0A8I6AT95;M0R5Y9	Zbtb8os
407												Q8K3Y6;A2RRT6;F7F0B1	Zc3hav1
408												A0A8I6AV84;A0A8I6GKY5;A6IF73;A6IF74;A6IF75;D4A7U1	Zyx
409
410
411
412
413
414
415
416
417
418
419
420
421
422
423
424
425
426
427
428
429
430
431
432
433
434
435
436
437
438
439
440
441
442
443
444
445
446
447
448
449
450
451
452
453
454
455
456
457
458
459
460
461
462
463
464
465
466
467
468
469
470
471
472
473
474
475
476
477
478
479
480
481
482
483
484
485
486
487
488
489
490
491
492
493
494
495
496
497
498
499
500
501
502
503
504
505
506
507
508
509
510
511
512
513
514
515
516
517
518
519
520
521
522
523
524
525
526
527
528
529
530
531
532
533
534
535
536
537
538
539
540
541
542
543
544
545
546
547
548
549
550
551
552
553
554
555
556
557
558
559
560
561
562
563
564
565
566
567
568
569
570
571
572
573
574
575
576
577
578
579
580
581
582
583
584
585
586
587
588
589
590
591
592
593
594
595
596
597
598
599
600
601
602
603
604
605
606
607
608
609
610
611
612
613
614
615
616
617
618
619
620
621
622
623
624
625
626
627
628
629
630
631
632
633
634
635
636
637
638
639
640
641
642
643
644
645
646
647
648
649
650
651
652
653
654
655
656
657
658
659
660
661
662
663
664
665
666
667
668
669
670
671
672
673
674
675
676
677
678
679
680
681
682
683
684
685
686
687
688
689
690
691
692
693
694
695
696
697
698
699
700
701
702
703
704
705
706
707
708
709
710
711
712
713
714
715
716
717
718
719
720
721
722
723
724
725
726
727
728
729
730
731
732
733
734
735
736
737
738
739
740
741
742
743
744
745
746
747
748
749
750
751
752
753
754
755
756
757
758
759
760
761
762
763
764
765
766
767
768
769
770
771
772
773
774
775
776
777
778
779
780
781
782
783
784
785
786
787
788
789
790
791
792
793
794
795
796
797
798
799
800
801
802
803
804
805
806
807
808
809
810
811
812
813
814
815
816
817
818
819
820
821
822
823
824
825
826
827
828
829
830
831
832
833
834
835
836
837
838
839
840
841
842
843
844
845
846
847
848
849
850
851
852
853
854
855
856
857
858
859
860
861
862
863
864
865
866
867
868
869
870
871
872
873
874
875
876
877
878
879
880
881
882
883
884
885
886
887
888
889
890
891
892
893
894
895
896
897
898
899
900
901
902
903
904
905
906
907
908
909
910
911
912
913
914
915
916
917
918
919
920
921
922
923
924
925
926
927
928
929
930
931
932
933
934
935
936
937
938
939
940
941
942
943
944
945
946
947
948
949
950
951
952
953
954
955
956
957
958
959
960
961
962
963
964
965
966
967
968
969
970
971
972
973
974
975
976
977
978
979
980
981
982
983
984
985
986
987
988
989
990
991
992
993
994
995
996
997
998
999
1000
1001
1002
1003
1004
1005
1006
1007
1008
1009
1010
1011
1012
1013
1014
1015
1016
1017
1018
1019
1020
1021
1022
1023
1024
1025
1026
1027
1028
1029
1030
1031
1032
1033
1034
1035
1036
1037
1038
1039
1040
1041
1042
1043
1044
1045
1046
1047
1048
1049
1050
1051
1052
1053
1054
1055
1056
1057
1058
1059
1060
1061
1062
1063
1064
1065
1066
1067
1068
1069
1070
1071
1072
1073
1074
1075
1076
1077
1078
1079
1080
1081
1082
1083
1084
1085
1086
1087
1088
1089
1090
1091
1092
1093
1094
1095
1096
1097
1098
1099
1100
1101
1102
1103
1104
1105
1106
1107
1108
1109
1110
1111
1112
1113
1114
1115
1116
1117
1118
1119
1120
1121
1122
1123
1124
1125
1126
1127
1128
1129
1130
1131
1132
1133
1134
1135
1136
1137
1138
1139
1140
1141
1142
1143
1144
1145
1146
1147
1148
1149
1150
1151
1152
1153
1154
1155
1156
1157
1158
1159
1160
1161
1162
1163
1164
1165
1166
1167
1168
1169
1170
1171
1172
1173
1174
1175
1176
1177
1178
1179
1180
1181
1182
1183
1184
1185
1186
1187
1188
1189
1190
1191
1192
1193
1194
1195
1196
1197
1198
1199
1200
1201
1202
1203
1204
1205
1206
1207
1208
1209
1210
1211
1212
1213
1214
1215
1216
1217
1218
1219
1220
1221
1222
1223
1224
1225
1226
1227
1228
1229
1230
1231
1232
1233
1234
1235
1236
1237
1238
1239
1240
1241
1242
1243
1244
1245
1246
1247
1248
1249
1250
1251
1252
1253
1254
1255
1256
1257
1258
1259
1260
1261
1262
1263
1264
1265
1266
1267
1268
1269
1270
1271
1272
1273
1274
1275
1276
1277
1278
1279
1280
1281
1282
1283
1284
1285
1286
1287
1288
1289
1290
1291
1292
1293
1294
1295
1296
1297
1298
1299
1300
1301
1302
1303
1304
1305
1306
1307
1308
1309
1310
1311
1312
1313
1314
1315
1316
1317
1318
1319
1320
1321
1322
1323
1324
1325
1326
1327
1328
1329
1330
1331
1332
1333
1334
1335
1336
1337
1338
1339
1340
1341
1342
1343
1344
1345
1346
1347
1348
1349
1350
1351
1352
1353
1354
1355
1356
1357
1358
1359
1360
1361
1362
1363
1364
1365
1366
1367
1368
1369
1370
1371
1372
1373
1374
1375
1376
1377
1378
1379
1380
1381
1382
1383
1384
1385
1386
1387
1388
1389
1390
1391
1392
1393
1394
1395
1396
1397
1398
1399
1400
1401
1402
1403
1404
1405
1406
1407
1408
1409
1410
1411
1412
1413
1414
1415
1416
1417
1418
1419
1420
1421
1422
1423
1424
1425
1426
1427
1428
1429
1430
1431
1432
1433
1434
1435
1436
1437
1438
1439
1440
1441
1442
1443
1444
1445
1446
1447
1448
1449
1450
1451
1452
1453
1454
1455
1456
1457
1458
1459
1460
1461
1462
1463
1464
1465
1466
1467
1468
1469
1470
1471
1472
1473
1474
1475
1476
1477
1478
1479
1480
1481
1482
1483
1484
1485
1486
1487
1488
1489
1490
1491
1492
1493
1494
1495
1496
1497
1498
1499
1500
1501
1502
1503
1504
1505
1506
1507
1508
1509
1510
1511
1512
1513
1514
1515
1516
1517
1518
1519
1520
1521
1522
1523
1524
1525
1526
1527
1528
1529
1530
1531
1532
1533
1534
1535
1536
1537
1538
1539
1540
1541
1542
1543
1544
1545
1546
1547
1548
1549
1550
1551
1552
1553
1554
1555
1556
1557
1558
1559
1560
1561
1562
1563
1564
1565
1566
1567
1568
1569
1570
1571
1572
1573
1574
1575
1576
1577
1578
1579
1580
1581
1582
1583
1584
1585
1586
1587
1588
1589
1590
1591
1592
1593
1594
1595
1596
1597
1598
1599
1600
1601
1602
1603
1604
1605
1606
1607
1608
1609
1610
1611
1612
1613
1614
1615
1616
1617
1618
1619
1620
1621
1622
1623
1624
1625
1626
1627
1628
1629
1630
1631
1632
1633
1634
1635
1636
1637
1638
1639
1640
1641
1642
1643
1644
1645
1646
1647
1648
1649
1650
1651
1652
1653
1654
1655
1656
1657
1658
1659
1660
1661
1662
1663
1664
1665
1666
1667
1668
1669
1670
1671
1672
1673
1674
1675
1676
1677
1678
1679
1680
1681
1682
1683
1684
1685
1686
1687
1688
1689
1690
1691
1692
1693
1694
1695
1696
1697
1698
1699
1700
1701
1702
1703
1704
1705
1706
1707
1708
1709
1710
1711
1712
1713
1714
1715
1716
1717
1718
1719
1720
1721
1722
1723
1724
1725
1726
1727
1728
1729
1730
1731
1732
1733
1734
1735
1736
1737
1738
1739
1740
1741
1742
1743
1744
1745
1746
1747
1748
1749
1750
1751
1752
1753
1754
1755
1756
1757
1758
1759
1760
1761
1762
1763
1764
1765
1766
1767
1768
1769
1770
1771
1772
1773
1774
1775
1776
1777
1778
1779
1780
1781
1782
1783
1784
1785
1786
1787
1788
1789
1790
1791
1792
1793
1794
1795
1796
1797
1798
1799
1800
1801
1802
1803
1804
1805
1806
1807
1808
1809
1810
1811
1812
1813
1814
1815
1816
1817
1818
1819
1820
1821
1822
1823
1824
1825
1826
1827
1828
1829
1830
1831
1832
1833
1834
1835
1836
1837
1838
1839
1840
1841
1842
1843
1844
1845
1846
1847
1848
1849
1850
1851
1852
1853
1854
1855
1856
1857
1858
1859
1860
1861
1862
1863
1864
1865
1866
1867
1868
1869
1870
1871
1872
1873
1874
1875
1876
1877
1878
1879
1880
1881
1882
1883
1884
1885
1886
1887
1888
1889
1890
1891
1892
1893
1894
1895
1896
1897
1898
1899
1900
1901
1902
1903
1904
1905
1906
1907
1908
1909
1910
1911
1912
1913
1914
1915
1916
1917
1918
1919
1920
1921
1922
1923
1924
1925
1926
1927
1928
1929
1930
1931
1932
1933
1934
1935
1936
1937
1938
1939
1940
1941
1942
1943
1944
1945
1946
1947
1948
1949
1950
1951
1952
1953
1954
1955
1956
1957
1958
1959
1960
1961
1962
1963
1964
1965
1966
1967
1968
1969
1970
1971
1972
1973
1974
1975
1976
1977
1978
1979
1980
1981
1982
1983
1984
1985
1986
1987
1988
1989
1990
1991
1992
1993
1994
1995
1996
1997
[truncated: 2,003 more rows]

## Sheet: Summary_table_BP
RIVEGO GO Reduction Summary Biological Processes (BP) of identified intersecting proteins
Kidney studies 1 and 2	Kidney – Urine study 2	Kidney – Plasma study 2	Kidney study 1 Proteomics and Transcriptomics	Kidney study 2 Proteomics and Transcriptomics	Kidney studies 1 and 2 Proteomics and Transcriptomics
Upregulated Biological Processes	Upregulated Biological Processes	Upregulated Biological Processes	Upregulated Biological Processes	Upregulated Biological Processes	Upregulated Biological Processes
Regulation of collagen fibril organization	Negative regulation of endopeptidase activity	Complement activation	Negative regulation of neuron projection development	Integrin-mediated signalling pathway	Regulation of cell shape
Cellular response to reactive nitrogen species	Acute-phase response		Actin cytoskeleton organization	Endodermal cell differentiation	Response to mechanical stimulus
Cytosol to endoplasmic reticulum transport	Plasminogen activation		Innate immune response	Extracellular matrix organization	Endodermal cell differentiation
Peptidyl-cysteine methylation	Collagen fibril organization		Endodermal cell differentiation	Proteolysis involved in cellular protein catabolic processs	Proteolysis involved in cellular protein catabolic process
Prenylcysteine catabolic process	Hyaluronan metabolic process		Proteolysis involved in cellular protein catabolic process	Phagocytosis	Extracellular matrix organization
Antigen processing and presentation fo exogenous protein antigen via MHC class 1b, TAP-dependent	Cytolysis		Collagen biosynthetic process	Cyclooxygenase pathway	Phagocytosis
Positive regulation of telomerase RNA reverse transcriptase activity	Reverse cholesterol transport		Cell adhesion	Respiratory burst	Cell adhesion
Uropod organization	Cell-matrix adhesion		Phagocytosis	Microtubule-based process	Cell-matrix adhesion
Amyloid-beta clearance	Cholesterol metabolic process		Cell-matrix adhesion	Cell adhesion	Apoptotic process
Development of secondary sexual characteristics	Cell adhesion		Apoptotic process	Cell-matrix adhesion	Respiratory burst
B cell apoptotic process			Respiratory burst	Superoxide metabolic process	Cell population proliferation
Fructose 6-phosephate metabolic process			Immune system process	Cell population proliferation
Maintenance of cell poloarity			Cell population proliferation	Cell activation
Collagen biosynthetic process				Complement- depenedent cytotoxicity
Positive regulation by host of viral process
RNA metabolic process
Kidney study 1 and 2	Kidney – Urine study 2	Kidney – Plasma study 2	Kidney study 1 Proteomics and Transcriptomics	Kidneys study 2 Proteomics and Transcriptomics	Kidneys studies 1 and 2 Proteomics and Transcriptomics
Downregulated Biological Processes	Downregulated Biological Processes	Downregulated Biological Processes	Downregulated Biological Processes	Downregulated Biological Processes	Downregulated Biological Processes
Translation initiation	Regulation of protein kinase activiy	None	Response to activity	Branched-chain amno acid catabolic process	Response to activity
Cellular oxidant detoxification	Proteolysis		Fatty acid beta-oxidation using acyl-CoA dehydrogenase	Response to oxidative stress	Fatty acid beta-oxidation using acyl-CoA dehydrogenase
Positive regulation of translation	L-cystine transport		Glutathione metabolic process	Mitochondrial respiratory chain complex I assemply	Glutathione metabolic process
Endoplsmic reticulum to Golgi vesicle-mediated transport	Microvillus assembly		Negative regulation of fatty acid oxidation	Proton membrane transport	Negative regulation of fatty acid oxidation
Endodermal cell differentiation	Viral entry into host cell		Electron transport chain	Regulation of cholesterol metabolic process	Electron transport chain
Collagen fibril organizaiton			Sodium ion transport	Hydrogen peroxide biosynthetic process	Sodium ion transport
Protein folding in endoplasmic reticulum			Nitrogen compound metabolic process	Liver development	Nitrogen compound metabolic process
Antigen porcesing and presentation of exogenous peptide antigen via MHC class II			Mitochondrial respiratory chain complex I assembly	Tricarboxylic acid cycle	Aging
Protein folding			Aging	Carbohydrate metabolic process	Mitochondrial respiratory chain complex I assembly
Eectron transport chain			Methylation	Methylation	Methylation
Cell-matrix adhesion				Cell redox homeostasis	Carbohydarate metabolic process
Carbohydrate metaboic process				Steroid metabolic process
Glucose 6-phosphate metabolic process				Generation of precursor metabolites and energy
Cell redox homeostasis				Nitrogen compound metabolic process
Epithelial cell proliferation				Generation of precurosor metabolites and energy
Maintenance of cell polarity				Cellular aldehyde metabolic process
Apoptotic process
IRES-dependent viral translational Initiation
Positive regulatio by host of viral processes
Localization
Nitrogen compound metabolic process

## Sheet: Summary_table_MF
Rivigo GO Reduction Summary Molecular Function (MF) of identified intersecting proteins
Kidney studies 1 and 2	Kidney – Urine study 2	Kidney – Plasma study 2	Kidney study 1 Proteomics and Transcriptomics	Kidneys study 2 Proteomics and Transcriptomics	Kidneys studies 1 and 2 Proteomics and Transcriptomics
Upregulated MF	Upregulated MF	Upregulated MF	Upregulated MF	Upregulated MF	Upregulated MF
C3HC4-type Ring finger domain binding	Signaling receptor binding	Endopeptidase inhibitor activity	Actin binding	Integrin binding	Actin binding
Ubiquitin ligase inhibitor actvity	Extracellular matrix structural constituent	Heparin binding	Extracellular matrix structural constituent	Heparin binding	Extracellular matrix structural constituent
Poly-pyrimidine tract binding	Serine-type endopeptidase activity		Endopeptidase activity	Endopeptidase activity	Calcium ion binding
N-acylneuraminate cytidylytransferase activity	Heparin binding		Calcium ion binding	NAD+ ADP-ribosyltransferase activity	Phospholipase inhibitor activity
Ubiquitin-like modifier activating enzyme activity	Copper ion binding		Protein binding	Scavenger receptor activity	Endopeptidase activity
Prenylcysteine oxidase activity	Protein binding		Phospholipase inhibitor activity	Calcium ion binding	Calcium-dependent phospholipid binding
Extracellular matrix constituent conferring elasticity	Phospholipid binding		Calcium-dependent phospholipid binding	Double stranded RNA binding	Heparin binding
m7G(5)'pppN diphosphate activity	Structural molecule activity		Heparin binding	Structural molecule activity	Protein binding
	Antioxidant activity		RNA binding	Protein-containing complex binding	Heme bidning
			Peroxidase acivity	Virus receptor activity	Protein-complex binding
			Protein-containing complex binding	Calcium-dependent phospholipid binding	Structural molecule activity
			Structural molecule activity	Phospholipase inhibitor activity	Catalytic activity
			Catalytic activity	Phosphatidyl 1, 4 biphosphate binding	Superoxide-generating NADPH oxidase activity
			Carbohydrate binding	Extracellular receptor activity
				Protein binding
				Molecular adaptor activity
				Signalling receptor activity
				Protein-macromolecule adaptor activity
				Catalytic activity
				Microfilament motor activity
				IMP dehydrogenase activity
				Transporter activity
CHECK
Kidney studies 1 and 2	Kidney – Urine study 2	Kidney – Plasma study 2	Kidney study 1 Proteomics and Transcriptomics	Kidneys study 2 Proteomics and Transcriptomics	Kidneys studies 1 and 2 Proteomics and Transcriptomics
Downregulated MF	Downregulated MF	Downregulated MF	Downregulated MF	Downregulated MF	Downregulated MF
Cadherin binding	Metallopeptidase activity	None	Flavin adenine dinucleotide binding	Flavin adenine dinucleotide biding	Flavin adenine dinucleotide biding
Translation initiation factor	Zinc ion binding		Electron transfer activity	Electron transfer activity	Acyl-CoA dehydrogenase activity
Protein disulfide isomerase activity	Identical protein binding		Glutathione transferase activity	Aminoacylase activity	Symporter activity
Structural consitituent of cytoskeleton	Acyltransferase activity		Butyrate-CoA ligase activity	Symporter activity	Glutamate-cysteine ligase activity
GRPase activity	Peptide binding		Aminoacylase activity	Oxidoreductase activity	Oxidoreductase activity
Glutatione transferase activity	Virus receptor activity		Oxidoreductase activity	Identical protein binding	Transminase activity aminoacylase activity
Catalase activity			Symporter activity	Acetyl-CoA C-actyltransferase activity	Catalytic activity lyase activity
Oxidoreductase activity			Protein homodimerization activity	Catalytic activity	Oxaloacetate decarboxylase activity
Colagen binding			Hydrolase activity	Succinate-CoA ligase (GDP-forming) activity	4 iron, 4 sulfur cluster binding
Catalytic activity			Catalytic activity	Ligase activity	Hydolase activity
Structrual molecule activity			Oxaloacetate decarboxylase activity	Enoyl-CoA hydratase activity	Quinone binding
Protein binding			Lyase activity	Lyase activity
GTPase inhibitor activity			4 iron, 4 sulfur cluster binding	4 iron, 4 sulfur cluster binding
Carbon-carbon lyase activity			Quinone binding	Ubiquinone binding
Nuclear import signal receptor activity			Protein-containing complex binding	Quinone binding
Butyrate-CoA ligase activity				Protein-containing complex binding
Microfilament motor activity				Enzyme regulator activity
Protein-containing complex binding
Calcium-dependent phospholipid binding
Nuclear localization sequence binding
Carbohydrate binding

## Sheet: Summary table_CC
GO Reduction Summary Cellular Component (CC)
Intersecting proteins
Kidney study 1 and 2	Kidney – Urine Study 2	Kidney – Plasma Study 2	Kidney Study 1 Proteomics and Transcriptomics	Kidneys Study 2 Proteomics and Transcriptomics	Kidneys Studies 1 and 2 Proteomics and Transcriptomics
Upregulated CC	Upregulated CC	Upregulated CC	Upregulated CC	Upregulated CC	Upregulated CC
AnxA2-p11 complex	Membrane attack complex	Extracelluar space	Extracellular exosome	Extracellular exosome	Extracellular exosome
Clathrin-sculpted gamma-aminobutyric acid transport vesicle membrane	Extracellular space	Extracellular region	Collagen trimer	Extracellular matrix	Collagen trimer
Membrane microdomain	Endoplasmic reticulum lumen	Basement membrane	Membrane	Collagen trimer	Extracellular matrix
Actin filament bundle	Cell surface		Membrane raft	Cytosol	Membrane
Interstitial matrix	Extracellular region		lamelllipodium	Ruffle	Cell surface
			Cell surface	Membrane raft	Membrane raft
			Extracellular matrix	Cell junction	Lamellipodium
			Cell junction	Focal adhesion	Cell junction
			Cell leading edge	Membrane	Brush border
			Cell projection	Extracellular region	Cell projection
			Extracellular region	Protein-containing complex	Cell leading edge
			Focal adhesion	Brush border	Extracellular region
			Brush border	Cell body	Focal adhesion
			Cell periphery	Cell surface	Protein-containing complex
			Myelin sheath adaxonal region	Cell leading edge	Myelin sheath adaxonal region
				Cell projection
Kidney study 1 and 2	Kidney – Urine Study 2	Kidney – Plasma Study 2	Kidney Study 1 Proteomics and Transcriptomics	Kidneys Study 2 Proteomics and Transcriptomics	Kidneys Studies 1 and 2 Proteomics and Transcriptomics
Downregulated CC	Downregulated CC	Downregulated CC	Downregulated CC	Downregulated CC	Downregulated CC
Cytosol	Extracellular exosome		Mitochondrion	Mitochondrion	Mitochondrion
Ribonecleoprotien complex	Apical plasma membrane		Apical plasma membrane	Respirasome	Apical plasma membrane
Extracellular exosome	Mprin A complex		Respirasome	Microvillus	Respirasome
Apical plasma membrane	Membrane raft		Spanning component of membrane	Apical plasma membrane	Membrane
Lamellipodium	Membrane			Apical part of cell
Protein-containing complex	Cell periphery			Membrane raft
Focal adhesion	Brush border
Membrane raft	Extracellular region
Cell leading edge	Focal adhesion
Brush border	Ruffle
Extracellular region
Membrane
Cell junction intercellular bridge
Apical part of cell
Cell surface
Membrane microdomain
Respirasome

## Sheet: Kidney(K)Study2_KStudy1_up
Rivigo GO reduction	Kidney studies 1 and 2 - proteomics upregulated
Category	Term	Count	%	PValue	Genes	List Total	Pop Hits	Pop Total	Fold Enrichment	Bonferroni	Benjamini	FDR		Term	PValue
GOTERM_CC_DIRECT	GO:0005739~mitochondrion	54	36.2416	5.52389e-25	DMGDH, ACADVL, ACAA2, ACSM3, GLDC, CISD3, DHTKD1, ACADL, ME1, HMGCS2, MLYCD, ACAD11, GSTK1, PHYH, HSDL2, ECH1, AMT, PRODH2, COX6B1, MTHFD1, NDUFS5, CAT, SUCLG1, MAPT, HAGH, CRYAB, SLC25A11, GCDH, NDUFB4, UQCRH, ATP5MJ, PCK1, NDUFA8, FAHD1, APOOL, TXNRD2, IDH3G, TXNRD1, GLYCTK, SUOX, DHRS4, AGMAT, GSTZ1, ALDH4A1, GCLC, TMLHE, UQCRQ, SFXN3, SARDH, SFXN1, ECHDC3, ACO1, NIT1, CRAT	146	1437	20562	5.29236	9.00395e-23	9.00395e-23	8.45156e-23		GO:0005739	5.52389e-25	mitochondrion
GOTERM_CC_DIRECT	GO:0005759~mitochondrial matrix	32	21.4765	5.91351e-24	DMGDH, GCDH, ACADVL, ACAA2, ACSS2, ACSM3, GLDC, ETFDH, ACSM5, DHTKD1, HYKK, ACADL, HMGCS2, MLYCD, GSTK1, FAHD1, TXNRD2, IDH3G, AADAT, AMT, SUOX, ATP5F1E, ACSF2, ETNPPL, GSTZ1, ALDH4A1, TMLHE, NDUFS7, SARDH, SUCLG1, PYROXD2, HAGH	146	389	20562	11.5854	9.63902e-22	4.81951e-22	4.52383e-22		GO:0005759	5.91351e-24	mitochondrial matrix
GOTERM_CC_DIRECT	GO:0070062~extracellular exosome	48	32.2148	1.66506e-12	CLIC5, ACY3, SLC23A1, SLC22A2, HBB, SLC3A1, SLC5A1, HNMT, SLC2A5, KHK, AQP1, SLC9A3R2, DPP4, CA1, TKFC, SPR, PODXL, SCRN2, PCK1, GGT1, GSTK1, NQO2, SLC15A2, TXNRD1, AKR1C1, ECH1, ANXA13, ABHD14B, BPGM, HBA1, MIF, FAH, UPB1, PM20D1, GGCT, SLC5A8, BHMT, MTHFD1, MEP1A, GSTA3, GPD1, CAT, GSTA1, DPEP1, ACO1, ALDH8A1, CRYAB, BLVRA	146	2218	20562	3.04784	2.71413e-10	9.04684e-11	8.49182e-11		GO:0070062	1.66506e-12	extracellular exosome
GOTERM_CC_DIRECT	GO:0016324~apical plasma membrane	21	14.094	2.31253e-12	SLC34A3, CLIC5, SLC15A1, ACY3, SLC6A18, SLC15A2, SLC23A1, SLC22A2, ANXA13, SLC3A1, SLC7A13, MYO7A, SLC5A1, SLC2A5, AQP1, SLC9A3R2, DPP4, SLC5A8, PODXL, DPEP1, ABCG2	146	376	20562	7.86582	3.76935e-10	9.42357e-11	8.84544e-11		GO:0016324	2.31253e-12	apical plasma membrane
GOTERM_MF_DIRECT	GO:0050660~flavin adenine dinucleotide binding	12	8.05369	3.40124e-12	GCDH, ACADVL, ACADL, ACOX1, TXNRD2, TXNRD1, CHDH, ETFDH, FMO3, ACAD11, KMO, FMO4	144	68	18869	23.1238	1.41153e-09	1.41491e-09	1.36049e-09		GO:0050660	3.40124e-12	flavin adenine dinucleotide binding
GOTERM_MF_DIRECT	GO:0016491~oxidoreductase activity	17	11.4094	3.89757e-11	DMGDH, GSTK1, NQO2, HSDL2, TXNRD2, TXNRD1, ETFDH, DHRS4, ALDH4A1, DHRS7, IYD, CHDH, ASPDH, SARDH, PYROXD2, CYP2E1, BLVRA	144	239	18869	9.32046	1.61749e-08	8.10694e-09	7.79513e-09		GO:0016491	3.89757e-11	oxidoreductase activity
GOTERM_CC_DIRECT	GO:0005782~peroxisomal matrix	9	6.04027	3.41354e-09	GSTK1, PHYH, ACOX1, ECH1, CAT, HACL1, MLYCD, CRAT, DHRS4	146	53	20562	23.9155	5.56406e-07	1.11281e-07	1.04454e-07		GO:0005782	3.41354e-09	peroxisomal matrix
GOTERM_CC_DIRECT	GO:0005777~peroxisome	11	7.38255	6.81866e-09	GSTK1, PHYH, HSDL2, ACOX1, ECH1, CAT, HACL1, MLYCD, ACAD11, CRAT, DHRS4	146	112	20562	13.8321	1.11144e-06	1.8524e-07	1.73876e-07		GO:0005777	6.81866e-09	peroxisome
GOTERM_CC_DIRECT	GO:0005743~mitochondrial inner membrane	18	12.0805	3.25447e-08	NDUFA8, NDUFA6, APOOL, NDUFB4, ETFDH, PRODH2, ATP5F1E, UQCRH, COX6B1, NDUFS7, UQCRQ, CHDH, NDUFS5, ATP5MJ, CYP2E1, ACAD11, CRAT, SLC25A11	146	465	20562	5.4517	5.30477e-06	7.57826e-07	7.11334e-07		GO:0005743	3.25447e-08	mitochondrial inner membrane
GOTERM_BP_DIRECT	GO:0006749~glutathione metabolic process	8	5.36913	4.25778e-08	GSTZ1, GSTK1, CLIC5, GSTA4, GSTA3, GSTA1, DPEP1, HAGH	140	47	19308	23.4748	3.66163e-05	3.65744e-05	3.56802e-05		GO:0006749	4.25778e-08	glutathione metabolic process
GOTERM_BP_DIRECT	GO:0033539~fatty acid beta-oxidation using acyl-CoA dehydrogenase	5	3.3557	8.1622e-07	GCDH, ACADVL, ACADL, ETFDH, ACAD11	140	11	19308	62.6883	0.000701703	0.000350566	0.000341996		GO:0033539	8.1622e-07	fatty acid beta-oxidation using acyl-CoA dehydrogenase
GOTERM_BP_DIRECT	GO:0022900~electron transport chain	7	4.69799	4.5437e-06	ALDH4A1, DMGDH, NQO2, GLDC, HAAO, ME1, ETFDH	140	60	19308	16.09	0.00389997	0.00130101	0.00126921		GO:0022900	4.5437e-06	electron transport chain
GOTERM_BP_DIRECT	GO:0009060~aerobic respiration	7	4.69799	1.12187e-05	NDUFA8, NDUFA6, NDUFS7, NDUFS5, NDUFB4, CAT, UQCRH	140	70	19308	13.7914	0.0096017	0.00240921	0.00235031		GO:0009060	1.12187e-05	aerobic respiration
GOTERM_MF_DIRECT	GO:0009055~electron carrier activity	7	4.69799	1.50066e-05	ALDH4A1, DMGDH, NQO2, GLDC, HAAO, ME1, ETFDH	144	70	18869	13.1035	0.00620843	0.00164528	0.001582		GO:0009055	1.50066e-05	electron carrier activity
GOTERM_MF_DIRECT	GO:0050661~NADP binding	6	4.02685	1.582e-05	SPR, CAT, ASPDH, ME1, FMO3, FMO4	144	42	18869	18.7192	0.00654387	0.00164528	0.001582		GO:0050661	1.582e-05	NADP binding
GOTERM_BP_DIRECT	GO:0098869~cellular oxidant detoxification	7	4.69799	1.9467e-05	GSTZ1, GSTK1, TXNRD2, TXNRD1, GSTA1, HBB, HBA1	140	77	19308	12.5377	0.0166024	0.00334443	0.00326267		GO:0098869	1.9467e-05	cellular oxidant detoxification
GOTERM_CC_DIRECT	GO:0005829~cytosol	63	42.2819	2.2722e-05	ACY3, TPMT, HBB, HNMT, KHK, CA1, SPR, ME1, MLYCD, GSTK1, PHYH, HMGCS1, ECH1, ABHD14B, BPGM, MYO7A, MIF, HBA1, KMO, UPB1, ASRGL1, GCHFR, MTHFD1, ACOX1, GPD1, ASPG, CAT, RGN, USP40, TRIM16, MAPT, HAGH, CRYAB, BLVRA, ACSS2, HAAO, TKFC, AFMID, EPB41L3, HACL1, PCK1, OSBPL8, NQO2, FAHD1, DMTN, TXNRD2, TXNRD1, GLYCTK, AKR1C1, FAH, DHRS4, GSTZ1, GGCT, ALDH4A1, GCLC, BHMT, GSTA4, GSTA3, GSTA1, ACO1, GCLM,…	146	5510	20562	1.61028	0.00369689	0.000462962	0.000434559		GO:0005829	2.2722e-05	cytosol
GOTERM_MF_DIRECT	GO:0004364~glutathione transferase activity	5	3.3557	4.84699e-05	GSTZ1, GSTK1, GSTA4, GSTA3, GSTA1	144	27	18869	24.2657	0.0199145	0.00403269	0.00387759		GO:0004364	4.84699e-05	glutathione transferase activity
GOTERM_MF_DIRECT	GO:0003995~acyl-CoA dehydrogenase activity	4	2.68456	6.72638e-05	GCDH, ACADVL, ACADL, ACAD11	144	11	18869	47.649	0.0275294	0.00466363	0.00448426		GO:0003995	6.72638e-05	acyl-CoA dehydrogenase activity
GOTERM_CC_DIRECT	GO:0031526~brush border membrane	6	4.02685	7.62142e-05	SLC34A3, SLC6A18, SLC3A1, SLC5A1, ABCG2, AQP1	146	62	20562	13.6293	0.0123465	0.00138032	0.00129564		GO:0031526	7.62142e-05	brush border membrane
GOTERM_BP_DIRECT	GO:0042776~mitochondrial ATP synthesis coupled proton transport	6	4.02685	0.000105047	NDUFA8, NDUFA6, NDUFS7, NDUFS5, NDUFB4, ATP5F1E	140	65	19308	12.7305	0.0863845	0.013465	0.0131358		GO:0042776	0.000105047	mitochondrial ATP synthesis coupled proton transport
GOTERM_BP_DIRECT	GO:0006750~glutathione biosynthetic process	4	2.68456	0.000125402	GCLC, HAGH, GGT1, GCLM	140	14	19308	39.4041	0.10224	0.013465	0.0131358		GO:0006750	0.000125402	glutathione biosynthetic process
GOTERM_BP_DIRECT	GO:0006536~glutamate metabolic process	4	2.68456	0.000125402	GCLC, AADAT, GGT1, GCLM	140	14	19308	39.4041	0.10224	0.013465	0.0131358		GO:0006536	0.000125402	glutamate metabolic process
GOTERM_CC_DIRECT	GO:0031966~mitochondrial membrane	8	5.36913	0.000136987	ACADVL, NDUFA6, ACADL, ETFDH, SFXN3, ACAD11, ABCG2, COX6B1	146	159	20562	7.08607	0.0220829	0.00223289	0.0020959		GO:0031966	0.000136987	mitochondrial membrane
GOTERM_MF_DIRECT	GO:0071949~FAD binding	5	3.3557	0.000233839	NQO2, ACOX1, TXNRD1, KMO, PRODH2	144	40	18869	16.3793	0.0924936	0.0138967	0.0133623		GO:0071949	0.000233839	FAD binding
GOTERM_MF_DIRECT	GO:0008137~NADH dehydrogenase (ubiquinone) activity	5	3.3557	0.000310261	NDUFA8, NDUFA6, NDUFS7, NDUFS5, NDUFB4	144	43	18869	15.2366	0.120831	0.0140947	0.0135526		GO:0008137	0.000310261	NADH dehydrogenase (ubiquinone) activity
GOTERM_MF_DIRECT	GO:0016627~oxidoreductase activity, acting on the CH-CH group of donors	4	2.68456	0.000319951	GCDH, ACADVL, ACOX1, ACAD11	144	18	18869	29.1188	0.124361	0.0140947	0.0135526		GO:0016627	0.000319951	oxidoreductase activity, acting on the CH-CH group of donors
GOTERM_MF_DIRECT	GO:0004466~long-chain-acyl-CoA dehydrogenase activity	3	2.01342	0.000338816	ACADVL, ACADL, ACAD11	144	4	18869	98.276	0.131191	0.0140947	0.0135526		GO:0004466	0.000338816	long-chain-acyl-CoA dehydrogenase activity
GOTERM_BP_DIRECT	GO:0006120~mitochondrial electron transport, NADH to ubiquinone	5	3.3557	0.000360835	NDUFA8, NDUFA6, NDUFS7, NDUFS5, NDUFB4	140	47	19308	14.6717	0.266827	0.0344397	0.0335977		GO:0006120	0.000360835	mitochondrial electron transport, NADH to ubiquinone
GOTERM_CC_DIRECT	GO:0005747~mitochondrial respiratory chain complex I	5	3.3557	0.000424696	NDUFA8, NDUFA6, NDUFS7, NDUFS5, NDUFB4	146	50	20562	14.0836	0.0668975	0.00629323	0.00590714		GO:0005747	0.000424696	mitochondrial respiratory chain complex I
GOTERM_BP_DIRECT	GO:0030185~nitric oxide transport	3	2.01342	0.000507302	HBB, HBA1, AQP1	140	5	19308	82.7486	0.353635	0.0435773	0.0425119		GO:0030185	0.000507302	nitric oxide transport
GOTERM_BP_DIRECT	GO:0006631~fatty acid metabolic process	6	4.02685	0.000620214	PM20D1, ECHDC3, HACL1, CYP2E1, GGT1, ACSF2	140	95	19308	8.71038	0.413481	0.0484331	0.047249		GO:0006631	0.000620214	fatty acid metabolic process
GOTERM_BP_DIRECT	GO:0034354~'de novo' NAD biosynthetic process from tryptophan	3	2.01342	0.00075736	HAAO, AFMID, KMO	140	6	19308	68.9571	0.478776	0.0525541	0.0512693		GO:0034354	0.00075736	'de novo' NAD biosynthetic process from tryptophan
GOTERM_BP_DIRECT	GO:0006637~acyl-CoA metabolic process	4	2.68456	0.000840836	ACSM3, ACSM5, MLYCD, ACSF2	140	26	19308	21.2176	0.514911	0.0525541	0.0512693		GO:0006637	0.000840836	acyl-CoA metabolic process
GOTERM_BP_DIRECT	GO:0006805~xenobiotic metabolic process	6	4.02685	0.000856528	TPMT, GSTA4, GSTA3, AKR1C1, GSTA1, CYP2E1	140	102	19308	8.11261	0.521419	0.0525541	0.0512693		GO:0006805	0.000856528	xenobiotic metabolic process
GOTERM_CC_DIRECT	GO:0005903~brush border	5	3.3557	0.000963644	SLC34A3, SLC15A1, SLC23A1, MYO7B, AQP1	146	62	20562	11.3577	0.145424	0.0130895	0.0122865		GO:0005903	0.000963644	brush border
GOTERM_MF_DIRECT	GO:0042803~protein homodimerization activity	15	10.0671	0.00109881	NQO2, HMGCS1, GLDC, TXNRD2, AADAT, UPB1, GGCT, GSTZ1, DPP4, GSTA4, ACOX1, GPD1, CAT, CRYAB, ABCG2	144	716	18869	2.74514	0.36635	0.0404993	0.0389417		GO:0042803	0.00109881	protein homodimerization activity
GOTERM_BP_DIRECT	GO:0032981~mitochondrial respiratory chain complex I assembly	5	3.3557	0.00110258	NDUFA8, NDUFA6, NDUFS7, NDUFS5, NDUFB4	140	63	19308	10.9456	0.612772	0.0631411	0.0615975		GO:0032981	0.00110258	mitochondrial respiratory chain complex I assembly
GOTERM_MF_DIRECT	GO:0004046~aminoacylase activity	3	2.01342	0.00116825	PM20D1, ACY3, CAT	144	7	18869	56.1577	0.384369	0.0404993	0.0389417		GO:0004046	0.00116825	aminoacylase activity
GOTERM_CC_DIRECT	GO:0070469~respiratory chain	4	2.68456	0.00121285	NDUFA8, NDUFA6, NDUFS7, NDUFS5	146	30	20562	18.7781	0.179478	0.0152073	0.0142743		GO:0070469	0.00121285	respiratory chain
GOTERM_BP_DIRECT	GO:0006099~tricarboxylic acid cycle	4	2.68456	0.00170075	IDH3G, ACO1, SUCLG1, DHTKD1	140	33	19308	16.7169	0.768666	0.0905517	0.088338		GO:0006099	0.00170075	tricarboxylic acid cycle
GOTERM_BP_DIRECT	GO:0046322~negative regulation of fatty acid oxidation	3	2.01342	0.00179206	ACADVL, ACADL, FMO4	140	9	19308	45.9714	0.786166	0.0905517	0.088338		GO:0046322	0.00179206	negative regulation of fatty acid oxidation
GOTERM_MF_DIRECT	GO:0022857~transmembrane transporter activity	7	4.69799	0.00194422	SLC22A2, SFXN3, SFXN1, SLC5A1, SLC2A5, SLC25A11, AQP1	144	171	18869	5.36399	0.55409	0.0549917	0.0528766		GO:0022857	0.00194422	transmembrane transporter activity
GOTERM_MF_DIRECT	GO:0016655~oxidoreductase activity, acting on NAD(P)H, quinone or similar compound as acceptor	3	2.01342	0.00198287	NDUFS7, AKR1C1, DHRS4	144	9	18869	43.6782	0.561199	0.0549917	0.0528766		GO:0016655	0.00198287	oxidoreductase activity, acting on NAD(P)H, quinone or similar compound as acceptor
GOTERM_MF_DIRECT	GO:0031406~carboxylic acid binding	3	2.01342	0.00198287	PHYH, AKR1C1, PCK1	144	9	18869	43.6782	0.561199	0.0549917	0.0528766		GO:0031406	0.00198287	carboxylic acid binding
GOTERM_BP_DIRECT	GO:0006730~one-carbon metabolic process	4	2.68456	0.00219094	CA1, MTHFD1, SFXN3, SFXN1	140	36	19308	15.3238	0.848365	0.104557	0.102001		GO:0006730	0.00219094	one-carbon metabolic process
GOTERM_MF_DIRECT	GO:0015293~symporter activity	5	3.3557	0.00265989	SLC15A1, SLC5A8, SLC6A18, SLC15A2, SLC16A4	144	76	18869	8.62071	0.668896	0.0656713	0.0631455		GO:0015293	0.00265989	symporter activity
GOTERM_MF_DIRECT	GO:0016811~hydrolase activity, acting on carbon-nitrogen (but not peptide) bonds, in linear amides	3	2.01342	0.00299941	PM20D1, ACY3, UPB1	144	11	18869	35.7367	0.712527	0.0656713	0.0631455		GO:0016811	0.00299941	hydrolase activity, acting on carbon-nitrogen (but not peptide) bonds, in linear amides
GOTERM_MF_DIRECT	GO:0043177~organic acid binding	3	2.01342	0.00299941	HMGCS1, HBB, HBA1	144	11	18869	35.7367	0.712527	0.0656713	0.0631455		GO:0043177	0.00299941	organic acid binding
GOTERM_MF_DIRECT	GO:0047760~butyrate-CoA ligase activity	3	2.01342	0.00299941	ACSM3, ACSM5, ACSF2	144	11	18869	35.7367	0.712527	0.0656713	0.0631455		GO:0047760	0.00299941	butyrate-CoA ligase activity
GOTERM_BP_DIRECT	GO:0006865~amino acid transport	4	2.68456	0.00318652	SLC6A18, SFXN3, SLC3A1, SFXN1	140	41	19308	13.4551	0.935738	0.143757	0.140242		GO:0006865	0.00318652	amino acid transport
GOTERM_BP_DIRECT	GO:1902600~hydrogen ion transmembrane transport	6	4.02685	0.00334707	SLC15A1, SLC15A2, UQCRQ, ATP5F1E, UQCRH, COX6B1	140	139	19308	5.95313	0.944051	0.143757	0.140242		GO:1902600	0.00334707	hydrogen ion transmembrane transport
GOTERM_BP_DIRECT	GO:0015670~carbon dioxide transport	3	2.01342	0.00442431	HBB, HBA1, AQP1	140	14	19308	29.5531	0.977926	0.172749	0.168526		GO:0015670	0.00442431	carbon dioxide transport
GOTERM_BP_DIRECT	GO:0006807~nitrogen compound metabolic process	3	2.01342	0.00442431	PM20D1, NIT1, UPB1	140	14	19308	29.5531	0.977926	0.172749	0.168526		GO:0006807	0.00442431	nitrogen compound metabolic process
GOTERM_BP_DIRECT	GO:0006635~fatty acid beta-oxidation	4	2.68456	0.00498441	ACAA2, ACOX1, ECH1, ACAD11	140	48	19308	11.4929	0.986395	0.181857	0.177411		GO:0006635	0.00498441	fatty acid beta-oxidation
GOTERM_BP_DIRECT	GO:0071372~cellular response to follicle-stimulating hormone stimulus	3	2.01342	0.00508099	GCLC, HMGCS1, GCLM	140	15	19308	27.5829	0.987485	0.181857	0.177411		GO:0071372	0.00508099	cellular response to follicle-stimulating hormone stimulus
GOTERM_MF_DIRECT	GO:0008483~transaminase activity	3	2.01342	0.00561358	AADAT, AMT, ETNPPL	144	15	18869	26.2069	0.903305	0.116762	0.112272		GO:0008483	0.00561358	transaminase activity
GOTERM_BP_DIRECT	GO:0019395~fatty acid oxidation	3	2.01342	0.00577957	GCDH, ACOX1, MLYCD	140	16	19308	25.8589	0.993159	0.190948	0.18628		GO:0019395	0.00577957	fatty acid oxidation
GOTERM_BP_DIRECT	GO:0015671~oxygen transport	3	2.01342	0.00577957	HBB, BPGM, HBA1	140	16	19308	25.8589	0.993159	0.190948	0.18628		GO:0015671	0.00577957	oxygen transport
GOTERM_BP_DIRECT	GO:0008202~steroid metabolic process	4	2.68456	0.00657715	AKR1C1, CYP2E1, G6PC1, DHRS4	140	53	19308	10.4086	0.996569	0.201778	0.196845		GO:0008202	0.00657715	steroid metabolic process
GOTERM_BP_DIRECT	GO:0042542~response to hydrogen peroxide	4	2.68456	0.00657715	CAT, HBB, HBA1, CRYAB	140	53	19308	10.4086	0.996569	0.201778	0.196845		GO:0042542	0.00657715	response to hydrogen peroxide
GOTERM_MF_DIRECT	GO:0016746~transferase activity, transferring acyl groups	4	2.68456	0.00757151	ACAA2, HMGCS1, ABHD14B, CRAT	144	53	18869	9.88941	0.957325	0.149988	0.144219		GO:0016746	0.00757151	transferase activity, transferring acyl groups
GOTERM_BP_DIRECT	GO:0042574~retinal metabolic process	3	2.01342	0.00812053	AKR1C1, ALDH8A1, DHRS4	140	19	19308	21.7759	0.999099	0.240536	0.234655		GO:0042574	0.00812053	retinal metabolic process
GOTERM_BP_DIRECT	GO:0014823~response to activity	4	2.68456	0.00844055	GCLC, CAT, PCK1, GCLM	140	58	19308	9.51133	0.999317	0.241681	0.235773		GO:0014823	0.00844055	response to activity
GOTERM_MF_DIRECT	GO:0000062~fatty-acyl-CoA binding	3	2.01342	0.00896281	GCDH, ACADVL, ACADL	144	19	18869	20.6897	0.976159	0.169479	0.16296		GO:0000062	0.00896281	fatty-acyl-CoA binding
GOTERM_BP_DIRECT	GO:0071320~cellular response to cAMP	4	2.68456	0.00969253	DMTN, GPD1, PCK1, AQP1	140	61	19308	9.04356	0.99977	0.265199	0.258716		GO:0071320	0.00969253	cellular response to cAMP
GOTERM_BP_DIRECT	GO:0006693~prostaglandin metabolic process	3	2.01342	0.00987936	ACOX1, AKR1C1, GSTA1	140	21	19308	19.702	0.999804	0.265199	0.258716		GO:0006693	0.00987936	prostaglandin metabolic process
GOTERM_BP_DIRECT	GO:0006979~response to oxidative stress	5	3.3557	0.0114244	GCLC, NDUFA6, NDUFB4, ETFDH, GCLM	140	121	19308	5.69894	0.999949	0.29738	0.29011		GO:0006979	0.0114244	response to oxidative stress
GOTERM_MF_DIRECT	GO:0004602~glutathione peroxidase activity	3	2.01342	0.0119295	GSTZ1, GSTK1, GSTA1	144	22	18869	17.8684	0.993129	0.215768	0.20747		GO:0004602	0.0119295	glutathione peroxidase activity
GOTERM_BP_DIRECT	GO:0007568~aging	6	4.02685	0.0132502	GCLC, CAT, RGN, PCK1, KMO, GCLM	140	194	19308	4.26539	0.99999	0.324311	0.316383		GO:0007568	0.0132502	aging
GOTERM_CC_DIRECT	GO:0017109~glutamate-cysteine ligase complex	2	1.34228	0.0140543	GCLC, GCLM	146	2	20562	140.836	0.900451	0.152723	0.143354		GO:0017109	0.0140543	glutamate-cysteine ligase complex
GOTERM_CC_DIRECT	GO:0017090~meprin A complex	2	1.34228	0.0140543	MEP1B, MEP1A	146	2	20562	140.836	0.900451	0.152723	0.143354		GO:0017090	0.0140543	meprin A complex
GOTERM_BP_DIRECT	GO:0097069~cellular response to thyroxine stimulus	2	1.34228	0.0143467	GCLC, GCLM	140	2	19308	137.914	0.999996	0.324311	0.316383		GO:0097069	0.0143467	cellular response to thyroxine stimulus
GOTERM_BP_DIRECT	GO:0010142~farnesyl diphosphate biosynthetic process, mevalonate pathway	2	1.34228	0.0143467	HMGCS1, HMGCS2	140	2	19308	137.914	0.999996	0.324311	0.316383		GO:0010142	0.0143467	farnesyl diphosphate biosynthetic process, mevalonate pathway
GOTERM_BP_DIRECT	GO:0043605~cellular amide catabolic process	2	1.34228	0.0143467	PM20D1, NIT1	140	2	19308	137.914	0.999996	0.324311	0.316383		GO:0043605	0.0143467	cellular amide catabolic process
GOTERM_BP_DIRECT	GO:0006579~amino-acid betaine catabolic process	2	1.34228	0.0143467	DMGDH, BHMT	140	2	19308	137.914	0.999996	0.324311	0.316383		GO:0006579	0.0143467	amino-acid betaine catabolic process
GOTERM_MF_DIRECT	GO:0004067~asparaginase activity	2	1.34228	0.0151001	ASPG, ASRGL1	144	2	18869	131.035	0.99819	0.224344	0.215716		GO:0004067	0.0151001	asparaginase activity
GOTERM_MF_DIRECT	GO:0033703~3beta-hydroxy-5beta-steroid dehydrogenase activity	2	1.34228	0.0151001	AKR1C1, DHRS4	144	2	18869	131.035	0.99819	0.224344	0.215716		GO:0033703	0.0151001	3beta-hydroxy-5beta-steroid dehydrogenase activity
GOTERM_MF_DIRECT	GO:0004421~hydroxymethylglutaryl-CoA synthase activity	2	1.34228	0.0151001	HMGCS1, HMGCS2	144	2	18869	131.035	0.99819	0.224344	0.215716		GO:0004421	0.0151001	hydroxymethylglutaryl-CoA synthase activity
GOTERM_MF_DIRECT	GO:0004357~glutamate-cysteine ligase activity	2	1.34228	0.0151001	GCLC, GCLM	144	2	18869	131.035	0.99819	0.224344	0.215716		GO:0004357	0.0151001	glutamate-cysteine ligase activity
GOTERM_MF_DIRECT	GO:0035673~oligopeptide transmembrane transporter activity	2	1.34228	0.0151001	SLC15A1, SLC15A2	144	2	18869	131.035	0.99819	0.224344	0.215716		GO:0035673	0.0151001	oligopeptide transmembrane transporter activity
GOTERM_BP_DIRECT	GO:0097746~regulation of blood vessel diameter	3	2.01342	0.0172093	GCLC, HBB, GCLM	140	28	19308	14.7765	1	0.360557	0.351742		GO:0097746	0.0172093	regulation of blood vessel diameter
GOTERM_BP_DIRECT	GO:0042744~hydrogen peroxide catabolic process	3	2.01342	0.0172093	CAT, HBB, HBA1	140	28	19308	14.7765	1	0.360557	0.351742		GO:0042744	0.0172093	hydrogen peroxide catabolic process
GOTERM_BP_DIRECT	GO:0046686~response to cadmium ion	3	2.01342	0.0172093	GCLC, HAAO, CAT	140	28	19308	14.7765	1	0.360557	0.351742		GO:0046686	0.0172093	response to cadmium ion
GOTERM_MF_DIRECT	GO:0016787~hydrolase activity	7	4.69799	0.0176195	GCHFR, AFMID, ABHD14B, HAGH, BPGM, ATP5F1E, ASRGL1	144	272	18869	3.37222	0.999375	0.25134	0.241673		GO:0016787	0.0176195	hydrolase activity
GOTERM_MF_DIRECT	GO:0003824~catalytic activity	5	3.3557	0.0181255	AADAT, ECH1, SLC3A1, ECHDC3, ETNPPL	144	132	18869	4.96344	0.999495	0.25134	0.241673		GO:0003824	0.0181255	catalytic activity
GOTERM_MF_DIRECT	GO:0042802~identical protein binding	22	14.7651	0.0189229	ACADVL, ACY3, TXNRD1, MYO7A, MIF, AQP1, DHRS4, SLC9A3R2, GSTZ1, DPP4, ALDH4A1, ACADL, MEP1B, GSTA4, CAT, ME1, HACL1, MAPT, HMGCS2, MLYCD, CRYAB, ABCG2	144	1714	18869	1.68189	0.99964	0.253933	0.244166		GO:0042802	0.0189229	identical protein binding
GOTERM_BP_DIRECT	GO:0006520~cellular amino acid metabolic process	3	2.01342	0.0208757	PM20D1, ASPG, GGT1	140	31	19308	13.3465	1	0.368395	0.359389		GO:0006520	0.0208757	cellular amino acid metabolic process
GOTERM_BP_DIRECT	GO:0097052~L-kynurenine metabolic process	2	1.34228	0.0214433	AADAT, KMO	140	3	19308	91.9429	1	0.368395	0.359389		GO:0097052	0.0214433	L-kynurenine metabolic process
GOTERM_BP_DIRECT	GO:0019805~quinolinate biosynthetic process	2	1.34228	0.0214433	HAAO, KMO	140	3	19308	91.9429	1	0.368395	0.359389		GO:0019805	0.0214433	quinolinate biosynthetic process
GOTERM_BP_DIRECT	GO:0097089~methyl-branched fatty acid metabolic process	2	1.34228	0.0214433	PHYH, HACL1	140	3	19308	91.9429	1	0.368395	0.359389		GO:0097089	0.0214433	methyl-branched fatty acid metabolic process
GOTERM_BP_DIRECT	GO:0043420~anthranilate metabolic process	2	1.34228	0.0214433	HAAO, KMO	140	3	19308	91.9429	1	0.368395	0.359389		GO:0043420	0.0214433	anthranilate metabolic process
GOTERM_BP_DIRECT	GO:0019254~carnitine metabolic process, CoA-linked	2	1.34228	0.0214433	ACADL, CRAT	140	3	19308	91.9429	1	0.368395	0.359389		GO:0019254	0.0214433	carnitine metabolic process, CoA-linked
GOTERM_BP_DIRECT	GO:0035377~transepithelial water transport	2	1.34228	0.0214433	SLC5A1, AQP1	140	3	19308	91.9429	1	0.368395	0.359389		GO:0035377	0.0214433	transepithelial water transport
GOTERM_BP_DIRECT	GO:0061624~fructose catabolic process to hydroxyacetone phosphate and glyceraldehyde-3-phosphate	2	1.34228	0.0214433	TKFC, GLYCTK	140	3	19308	91.9429	1	0.368395	0.359389		GO:0061624	0.0214433	fructose catabolic process to hydroxyacetone phosphate and glyceraldehyde-3-phosphate
GOTERM_BP_DIRECT	GO:0010133~proline catabolic process to glutamate	2	1.34228	0.0214433	ALDH4A1, PRODH2	140	3	19308	91.9429	1	0.368395	0.359389		GO:0010133	0.0214433	proline catabolic process to glutamate
GOTERM_MF_DIRECT	GO:0016668~oxidoreductase activity, acting on a sulfur group of donors, NAD(P) as acceptor	2	1.34228	0.022565	TXNRD2, TXNRD1	144	3	18869	87.3565	0.999923	0.293345	0.282063		GO:0016668	0.022565	oxidoreductase activity, acting on a sulfur group of donors, NAD(P) as acceptor
GOTERM_CC_DIRECT	GO:0005758~mitochondrial intermembrane space	4	2.68456	0.0258453	NDUFA8, NDUFS5, CAT, SUOX	146	90	20562	6.25936	0.985993	0.263299	0.247146		GO:0005758	0.0258453	mitochondrial intermembrane space
GOTERM_BP_DIRECT	GO:2000379~positive regulation of reactive oxygen species metabolic process	3	2.01342	0.0262186	NQO2, AKR1C1, DHRS4	140	35	19308	11.8212	1	0.396442	0.38675		GO:2000379	0.0262186	positive regulation of reactive oxygen species metabolic process
GOTERM_BP_DIRECT	GO:0006814~sodium ion transport	4	2.68456	0.0272326	SLC34A3, SLC5A8, SLC23A1, SLC5A1	140	90	19308	6.12952	1	0.396442	0.38675		GO:0006814	0.0272326	sodium ion transport
GOTERM_BP_DIRECT	GO:0006641~triglyceride metabolic process	3	2.01342	0.027632	CAT, CYP2E1, G6PC1	140	36	19308	11.4929	1	0.396442	0.38675		GO:0006641	0.027632	triglyceride metabolic process
GOTERM_MF_DIRECT	GO:0020037~heme binding	5	3.3557	0.0279672	CAT, HBB, CYP2E1, HBA1, SUOX	144	151	18869	4.3389	0.999992	0.308157	0.296305		GO:0020037	0.0279672	heme binding
GOTERM_BP_DIRECT	GO:0006546~glycine catabolic process	2	1.34228	0.0284891	GLDC, AMT	140	4	19308	68.9571	1	0.396442	0.38675		GO:0006546	0.0284891	glycine catabolic process
GOTERM_BP_DIRECT	GO:0070189~kynurenine metabolic process	2	1.34228	0.0284891	AADAT, KMO	140	4	19308	68.9571	1	0.396442	0.38675		GO:0070189	0.0284891	kynurenine metabolic process
GOTERM_BP_DIRECT	GO:0046683~response to organophosphorus	2	1.34228	0.0284891	AKR1C1, TRIM16	140	4	19308	68.9571	1	0.396442	0.38675		GO:0046683	0.0284891	response to organophosphorus
GOTERM_BP_DIRECT	GO:0044752~response to human chorionic gonadotropin	2	1.34228	0.0284891	GCLC, GCLM	140	4	19308	68.9571	1	0.396442	0.38675		GO:0044752	0.0284891	response to human chorionic gonadotropin
GOTERM_BP_DIRECT	GO:0051409~response to nitrosative stress	2	1.34228	0.0284891	GCLC, GCLM	140	4	19308	68.9571	1	0.396442	0.38675		GO:0051409	0.0284891	response to nitrosative stress
GOTERM_BP_DIRECT	GO:0042426~choline catabolic process	2	1.34228	0.0284891	DMGDH, CHDH	140	4	19308	68.9571	1	0.396442	0.38675		GO:0042426	0.0284891	choline catabolic process
GOTERM_BP_DIRECT	GO:0006534~cysteine metabolic process	2	1.34228	0.0284891	GCLC, GCLM	140	4	19308	68.9571	1	0.396442	0.38675		GO:0006534	0.0284891	cysteine metabolic process
GOTERM_BP_DIRECT	GO:0006562~proline catabolic process	2	1.34228	0.0284891	ALDH4A1, PRODH2	140	4	19308	68.9571	1	0.396442	0.38675		GO:0006562	0.0284891	proline catabolic process
GOTERM_BP_DIRECT	GO:0006508~proteolysis	8	5.36913	0.0287284	PM20D1, DPP4, MEP1B, SCRN2, DPEP1, GGT1, TINAG, ASRGL1	140	409	19308	2.69759	1	0.396442	0.38675		GO:0006508	0.0287284	proteolysis
GOTERM_BP_DIRECT	GO:0006695~cholesterol biosynthetic process	3	2.01342	0.0290755	ACAA2, HMGCS1, HMGCS2	140	37	19308	11.1822	1	0.396442	0.38675		GO:0006695	0.0290755	cholesterol biosynthetic process
GOTERM_MF_DIRECT	GO:0016401~palmitoyl-CoA oxidase activity	2	1.34228	0.0299738	ACADL, ACOX1	144	4	18869	65.5174	0.999997	0.308157	0.296305		GO:0016401	0.0299738	palmitoyl-CoA oxidase activity
GOTERM_MF_DIRECT	GO:0017099~very-long-chain-acyl-CoA dehydrogenase activity	2	1.34228	0.0299738	ACADVL, ACAD11	144	4	18869	65.5174	0.999997	0.308157	0.296305		GO:0017099	0.0299738	very-long-chain-acyl-CoA dehydrogenase activity
GOTERM_MF_DIRECT	GO:0008948~oxaloacetate decarboxylase activity	2	1.34228	0.0299738	FAHD1, ME1	144	4	18869	65.5174	0.999997	0.308157	0.296305		GO:0008948	0.0299738	oxaloacetate decarboxylase activity
GOTERM_MF_DIRECT	GO:0050218~propionate-CoA ligase activity	2	1.34228	0.0299738	ACSS2, ACSM3	144	4	18869	65.5174	0.999997	0.308157	0.296305		GO:0050218	0.0299738	propionate-CoA ligase activity
GOTERM_MF_DIRECT	GO:0071916~dipeptide transmembrane transporter activity	2	1.34228	0.0299738	SLC15A1, SLC15A2	144	4	18869	65.5174	0.999997	0.308157	0.296305		GO:0071916	0.0299738	dipeptide transmembrane transporter activity
GOTERM_MF_DIRECT	GO:0022889~serine transmembrane transporter activity	2	1.34228	0.0299738	SFXN3, SFXN1	144	4	18869	65.5174	0.999997	0.308157	0.296305		GO:0022889	0.0299738	serine transmembrane transporter activity
GOTERM_MF_DIRECT	GO:0015333~peptide:proton symporter activity	2	1.34228	0.0299738	SLC15A1, SLC15A2	144	4	18869	65.5174	0.999997	0.308157	0.296305		GO:0015333	0.0299738	peptide:proton symporter activity
GOTERM_MF_DIRECT	GO:0019825~oxygen binding	3	2.01342	0.0303713	HBB, CYP2E1, HBA1	144	36	18869	10.9196	0.999997	0.308157	0.296305		GO:0019825	0.0303713	oxygen binding
GOTERM_BP_DIRECT	GO:0030855~epithelial cell differentiation	4	2.68456	0.0304399	GSTK1, ACADVL, AKR1C1, GSTA1	140	94	19308	5.86869	1	0.40856	0.398572		GO:0030855	0.0304399	epithelial cell differentiation
GOTERM_MF_DIRECT	GO:0043531~ADP binding	3	2.01342	0.0335606	GCLC, ME1, MYO7A	144	38	18869	10.3448	0.999999	0.332409	0.319624		GO:0043531	0.0335606	ADP binding
GOTERM_BP_DIRECT	GO:0015811~L-cystine transport	2	1.34228	0.0354845	SLC3A1, SLC7A13	140	5	19308	55.1657	1	0.45332	0.442237		GO:0015811	0.0354845	L-cystine transport
GOTERM_BP_DIRECT	GO:0051900~regulation of mitochondrial depolarization	2	1.34228	0.0354845	GCLC, GCLM	140	5	19308	55.1657	1	0.45332	0.442237		GO:0051900	0.0354845	regulation of mitochondrial depolarization
GOTERM_BP_DIRECT	GO:0071332~cellular response to fructose stimulus	2	1.34228	0.0354845	PCK1, SLC2A5	140	5	19308	55.1657	1	0.45332	0.442237		GO:0071332	0.0354845	cellular response to fructose stimulus
GOTERM_BP_DIRECT	GO:0005975~carbohydrate metabolic process	5	3.3557	0.0358856	IDH3G, ME1, SLC3A1, BPGM, SLC2A5	140	172	19308	4.00914	1	0.45332	0.442237		GO:0005975	0.0358856	carbohydrate metabolic process
GOTERM_BP_DIRECT	GO:0045333~cellular respiration	3	2.01342	0.0367261	UQCRQ, UQCRH, COX6B1	140	42	19308	9.85102	1	0.457213	0.446036		GO:0045333	0.0367261	cellular respiration
GOTERM_MF_DIRECT	GO:0016829~lyase activity	3	2.01342	0.0368744	PM20D1, GLDC, HACL1	144	40	18869	9.8276	1	0.337563	0.32458		GO:0016829	0.0368744	lyase activity
GOTERM_MF_DIRECT	GO:0051287~NAD binding	3	2.01342	0.0368744	IDH3G, GPD1, ME1	144	40	18869	9.8276	1	0.337563	0.32458		GO:0051287	0.0368744	NAD binding
GOTERM_MF_DIRECT	GO:0031956~medium-chain fatty acid-CoA ligase activity	2	1.34228	0.0373267	ACSM5, ACSF2	144	5	18869	52.4139	1	0.337563	0.32458		GO:0031956	0.0373267	medium-chain fatty acid-CoA ligase activity
GOTERM_MF_DIRECT	GO:0003997~acyl-CoA oxidase activity	2	1.34228	0.0373267	ACOX1, CRAT	144	5	18869	52.4139	1	0.337563	0.32458		GO:0003997	0.0373267	acyl-CoA oxidase activity
GOTERM_BP_DIRECT	GO:0032259~methylation	4	2.68456	0.0374236	BHMT, TPMT, AMT, HNMT	140	102	19308	5.4084	1	0.459241	0.448014		GO:0032259	0.0374236	methylation
GOTERM_BP_DIRECT	GO:0006094~gluconeogenesis	3	2.01342	0.0383395	GPD1, PCK1, G6PC1	140	43	19308	9.62193	1	0.461359	0.45008		GO:0006094	0.0383395	gluconeogenesis
GOTERM_BP_DIRECT	GO:0042632~cholesterol homeostasis	4	2.68456	0.0392869	ACSM3, ACOX1, AKR1C1, G6PC1	140	104	19308	5.3044	1	0.461359	0.45008		GO:0042632	0.0392869	cholesterol homeostasis
GOTERM_BP_DIRECT	GO:0045454~cell redox homeostasis	3	2.01342	0.0399796	GCLC, TXNRD2, TXNRD1	140	44	19308	9.40325	1	0.461359	0.45008		GO:0045454	0.0399796	cell redox homeostasis
GOTERM_CC_DIRECT	GO:0031305~integral component of mitochondrial inner membrane	3	2.01342	0.0417649	ETFDH, SFXN3, SFXN1	146	46	20562	9.18493	0.999045	0.400452	0.375884		GO:0031305	0.0417649	integral component of mitochondrial inner membrane
GOTERM_BP_DIRECT	GO:0006572~tyrosine catabolic process	2	1.34228	0.0424299	GSTZ1, FAH	140	6	19308	45.9714	1	0.461359	0.45008		GO:0006572	0.0424299	tyrosine catabolic process
GOTERM_BP_DIRECT	GO:0006569~tryptophan catabolic process	2	1.34228	0.0424299	HAAO, KMO	140	6	19308	45.9714	1	0.461359	0.45008		GO:0006569	0.0424299	tryptophan catabolic process
GOTERM_BP_DIRECT	GO:0006084~acetyl-CoA metabolic process	2	1.34228	0.0424299	HMGCS1, HMGCS2	140	6	19308	45.9714	1	0.461359	0.45008		GO:0006084	0.0424299	acetyl-CoA metabolic process
GOTERM_BP_DIRECT	GO:0007423~sensory organ development	2	1.34228	0.0424299	MYO7B, MYO7A	140	6	19308	45.9714	1	0.461359	0.45008		GO:0007423	0.0424299	sensory organ development
GOTERM_BP_DIRECT	GO:1990962~drug transport across blood-brain barrier	2	1.34228	0.0424299	SLC22A2, ABCG2	140	6	19308	45.9714	1	0.461359	0.45008		GO:1990962	0.0424299	drug transport across blood-brain barrier
GOTERM_BP_DIRECT	GO:0010193~response to ozone	2	1.34228	0.0424299	CAT, CYP2E1	140	6	19308	45.9714	1	0.461359	0.45008		GO:0010193	0.0424299	response to ozone
GOTERM_BP_DIRECT	GO:0032869~cellular response to insulin stimulus	4	2.68456	0.0441478	GCLC, HMGCS2, PCK1, G6PC1	140	109	19308	5.06107	1	0.474037	0.462448		GO:0032869	0.0441478	cellular response to insulin stimulus
GOTERM_MF_DIRECT	GO:0004499~N,N-dimethylaniline monooxygenase activity	2	1.34228	0.0446243	FMO3, FMO4	144	6	18869	43.6782	1	0.394973	0.379782		GO:0004499	0.0446243	N,N-dimethylaniline monooxygenase activity
GOTERM_CC_DIRECT	GO:0016459~myosin complex	3	2.01342	0.0468141	ACAA2, MYO7B, MYO7A	146	49	20562	8.62259	0.999596	0.423927	0.397919		GO:0016459	0.0468141	myosin complex
GOTERM_BP_DIRECT	GO:0001561~fatty acid alpha-oxidation	2	1.34228	0.0493257	PHYH, HACL1	140	7	19308	39.4041	1	0.49848	0.486294		GO:0001561	0.0493257	fatty acid alpha-oxidation
GOTERM_BP_DIRECT	GO:0019464~glycine decarboxylation via glycine cleavage system	2	1.34228	0.0493257	GLDC, AMT	140	7	19308	39.4041	1	0.49848	0.486294		GO:0019464	0.0493257	glycine decarboxylation via glycine cleavage system
GOTERM_BP_DIRECT	GO:0009750~response to fructose	2	1.34228	0.0493257	SLC2A5, KHK	140	7	19308	39.4041	1	0.49848	0.486294		GO:0009750	0.0493257	response to fructose
GOTERM_BP_DIRECT	GO:0006085~acetyl-CoA biosynthetic process	2	1.34228	0.0493257	ACSS2, MLYCD	140	7	19308	39.4041	1	0.49848	0.486294		GO:0006085	0.0493257	acetyl-CoA biosynthetic process
GOTERM_BP_DIRECT	GO:0019852~L-ascorbic acid metabolic process	2	1.34228	0.0493257	GCLC, SLC23A1	140	7	19308	39.4041	1	0.49848	0.486294		GO:0019852	0.0493257	L-ascorbic acid metabolic process
GOTERM_MF_DIRECT	GO:0051539~4 iron, 4 sulfur cluster binding	3	2.01342	0.0493909	NDUFS7, ETFDH, ACO1	144	47	18869	8.36392	1	0.423072	0.4068		GO:0051539	0.0493909	4 iron, 4 sulfur cluster binding
GOTERM_MF_DIRECT	GO:0015645~fatty acid ligase activity	2	1.34228	0.051867	ACSM3, ACSM5	144	7	18869	37.4385	1	0.423072	0.4068		GO:0015645	0.051867	fatty acid ligase activity
GOTERM_MF_DIRECT	GO:0005372~water transmembrane transporter activity	2	1.34228	0.051867	SLC5A1, AQP1	144	7	18869	37.4385	1	0.423072	0.4068		GO:0005372	0.051867	water transmembrane transporter activity
GOTERM_MF_DIRECT	GO:0004321~fatty-acyl-CoA synthase activity	2	1.34228	0.051867	ACSM3, ACSM5	144	7	18869	37.4385	1	0.423072	0.4068		GO:0004321	0.051867	fatty-acyl-CoA synthase activity
GOTERM_CC_DIRECT	GO:0043229~intracellular organelle	2	1.34228	0.055051	SLC23A1, SLC5A1	146	8	20562	35.2089	0.999902	0.472279	0.443305		GO:0043229	0.055051	intracellular organelle
GOTERM_BP_DIRECT	GO:0006633~fatty acid biosynthetic process	3	2.01342	0.0558662	ACSM3, ACSM5, MLYCD	140	53	19308	7.80647	1	0.548317	0.534912		GO:0006633	0.0558662	fatty acid biosynthetic process
GOTERM_BP_DIRECT	GO:0006559~L-phenylalanine catabolic process	2	1.34228	0.0561722	GSTZ1, FAH	140	8	19308	34.4786	1	0.548317	0.534912		GO:0006559	0.0561722	L-phenylalanine catabolic process
GOTERM_BP_DIRECT	GO:0009086~methionine biosynthetic process	2	1.34228	0.0561722	BHMT, MTHFD1	140	8	19308	34.4786	1	0.548317	0.534912		GO:0009086	0.0561722	methionine biosynthetic process
GOTERM_MF_DIRECT	GO:0004791~thioredoxin-disulfide reductase activity	2	1.34228	0.0590552	TXNRD2, TXNRD1	144	8	18869	32.7587	1	0.463527	0.4457		GO:0004791	0.0590552	thioredoxin-disulfide reductase activity
GOTERM_MF_DIRECT	GO:0030976~thiamine pyrophosphate binding	2	1.34228	0.0590552	HACL1, DHTKD1	144	8	18869	32.7587	1	0.463527	0.4457		GO:0030976	0.0590552	thiamine pyrophosphate binding
GOTERM_CC_DIRECT	GO:0089717~spanning component of membrane	2	1.34228	0.0617172	SLC15A1, SLC15A2	146	9	20562	31.2968	0.999969	0.502995	0.472136		GO:0089717	0.0617172	spanning component of membrane
GOTERM_BP_DIRECT	GO:0006629~lipid metabolic process	5	3.3557	0.0627291	HMGCS1, ACOX1, GSTA3, DPEP1, FAH	140	207	19308	3.33126	1	0.594406	0.579875		GO:0006629	0.0627291	lipid metabolic process
GOTERM_BP_DIRECT	GO:0006972~hyperosmotic response	2	1.34228	0.0629697	HNMT, AQP1	140	9	19308	30.6476	1	0.594406	0.579875		GO:0006972	0.0629697	hyperosmotic response
GOTERM_BP_DIRECT	GO:0070293~renal absorption	2	1.34228	0.0629697	SLC15A2, HBB	140	9	19308	30.6476	1	0.594406	0.579875		GO:0070293	0.0629697	renal absorption
GOTERM_MF_DIRECT	GO:0070573~metallodipeptidase activity	2	1.34228	0.0661892	MEP1A, DPEP1	144	9	18869	29.1188	1	0.500631	0.481376		GO:0070573	0.0661892	metallodipeptidase activity
GOTERM_MF_DIRECT	GO:0004090~carbonyl reductase (NADPH) activity	2	1.34228	0.0661892	DHRS7, DHRS4	144	9	18869	29.1188	1	0.500631	0.481376		GO:0004090	0.0661892	carbonyl reductase (NADPH) activity
GOTERM_BP_DIRECT	GO:0046415~urate metabolic process	2	1.34228	0.0697186	G6PC1, ABCG2	140	10	19308	27.5829	1	0.65096	0.635046		GO:0046415	0.0697186	urate metabolic process
GOTERM_MF_DIRECT	GO:0031720~haptoglobin binding	2	1.34228	0.0732695	HBB, HBA1	144	10	18869	26.2069	1	0.538339	0.517634		GO:0031720	0.0732695	haptoglobin binding
GOTERM_MF_DIRECT	GO:0030170~pyridoxal phosphate binding	3	2.01342	0.0737628	GLDC, AADAT, ETNPPL	144	59	18869	6.66278	1	0.538339	0.517634		GO:0030170	0.0737628	pyridoxal phosphate binding
GOTERM_CC_DIRECT	GO:0031838~haptoglobin-hemoglobin complex	2	1.34228	0.0749098	HBB, HBA1	146	11	20562	25.6065	0.999997	0.581443	0.545772		GO:0031838	0.0749098	haptoglobin-hemoglobin complex
GOTERM_BP_DIRECT	GO:0033197~response to vitamin E	2	1.34228	0.0764193	HMGCS1, CAT	140	11	19308	25.0753	1	0.698342	0.68127		GO:0033197	0.0764193	response to vitamin E
GOTERM_BP_DIRECT	GO:0015810~aspartate transport	2	1.34228	0.0764193	SLC3A1, SLC7A13	140	11	19308	25.0753	1	0.698342	0.68127		GO:0015810	0.0764193	aspartate transport
GOTERM_BP_DIRECT	GO:0009435~NAD biosynthetic process	2	1.34228	0.083072	HAAO, ASPDH	140	12	19308	22.9857	1	0.728151	0.71035		GO:0009435	0.083072	NAD biosynthetic process
GOTERM_BP_DIRECT	GO:0033540~fatty acid beta-oxidation using acyl-CoA oxidase	2	1.34228	0.083072	ACOX1, CRAT	140	12	19308	22.9857	1	0.728151	0.71035		GO:0033540	0.083072	fatty acid beta-oxidation using acyl-CoA oxidase
GOTERM_BP_DIRECT	GO:1990542~mitochondrial transmembrane transport	2	1.34228	0.083072	SFXN3, SFXN1	140	12	19308	22.9857	1	0.728151	0.71035		GO:1990542	0.083072	mitochondrial transmembrane transport
GOTERM_BP_DIRECT	GO:0051693~actin filament capping	2	1.34228	0.083072	DMTN, VILL	140	12	19308	22.9857	1	0.728151	0.71035		GO:0051693	0.083072	actin filament capping
GOTERM_CC_DIRECT	GO:0005778~peroxisomal membrane	3	2.01342	0.0832501	ACOX1, CAT, DHRS4	146	68	20562	6.21334	0.999999	0.615189	0.577448		GO:0005778	0.0832501	peroxisomal membrane
GOTERM_MF_DIRECT	GO:0015075~ion transmembrane transporter activity	2	1.34228	0.0872707	SFXN3, SFXN1	144	12	18869	21.8391	1	0.615332	0.591666		GO:0015075	0.0872707	ion transmembrane transporter activity
GOTERM_MF_DIRECT	GO:0016805~dipeptidase activity	2	1.34228	0.0872707	SCRN2, DPEP1	144	12	18869	21.8391	1	0.615332	0.591666		GO:0016805	0.0872707	dipeptidase activity
GOTERM_BP_DIRECT	GO:0043154~negative regulation of cysteine-type endopeptidase activity involved in apoptotic process	3	2.01342	0.0883866	DPEP1, CRYAB, AQP1	140	69	19308	5.99627	1	0.7627	0.744054		GO:0043154	0.0883866	negative regulation of cysteine-type endopeptidase activity involved in apoptotic process
GOTERM_BP_DIRECT	GO:1901029~negative regulation of mitochondrial outer membrane permeabilization involved in apoptotic signaling pathway	2	1.34228	0.0896771	GCLC, ACAA2	140	13	19308	21.2176	1	0.7627	0.744054		GO:1901029	0.0896771	negative regulation of mitochondrial outer membrane permeabilization involved in apoptotic signaling pathway
GOTERM_BP_DIRECT	GO:0006751~glutathione catabolic process	2	1.34228	0.0896771	DPEP1, GGT1	140	13	19308	21.2176	1	0.7627	0.744054		GO:0006751	0.0896771	glutathione catabolic process
GOTERM_CC_DIRECT	GO:0005902~microvillus	3	2.01342	0.0939191	PODXL, MYO7B, MYO7A	146	73	20562	5.78777	1	0.615189	0.577448		GO:0005902	0.0939191	microvillus
GOTERM_MF_DIRECT	GO:0048038~quinone binding	2	1.34228	0.0941922	NDUFS7, ETFDH	144	13	18869	20.1592	1	0.629622	0.605406		GO:0048038	0.0941922	quinone binding
GOTERM_MF_DIRECT	GO:0016747~transferase activity, transferring acyl groups other than amino-acyl groups	2	1.34228	0.0941922	ACAA2, ASPG	144	13	18869	20.1592	1	0.629622	0.605406		GO:0016747	0.0941922	transferase activity, transferring acyl groups other than amino-acyl groups
GOTERM_CC_DIRECT	GO:0005750~mitochondrial respiratory chain complex III	2	1.34228	0.0943542	UQCRQ, UQCRH	146	14	20562	20.1194	1	0.615189	0.577448		GO:0005750	0.0943542	mitochondrial respiratory chain complex III
GOTERM_CC_DIRECT	GO:0005833~hemoglobin complex	2	1.34228	0.0943542	HBB, HBA1	146	14	20562	20.1194	1	0.615189	0.577448		GO:0005833	0.0943542	hemoglobin complex
GOTERM_MF_DIRECT	GO:0005506~iron ion binding	4	2.68456	0.0950013	TMLHE, HAAO, CYP2E1, HBA1	144	143	18869	3.66531	1	0.629622	0.605406		GO:0005506	0.0950013	iron ion binding
GOTERM_MF_DIRECT	GO:0044877~macromolecular complex binding	7	4.69799	0.0953514	GCHFR, NDUFA8, GCLC, TXNRD2, SLC3A1, GCLM, CRYAB	144	414	18869	2.21556	1	0.629622	0.605406		GO:0044877	0.0953514	macromolecular complex binding
GOTERM_BP_DIRECT	GO:0009410~response to xenobiotic stimulus	5	3.3557	0.0954619	GCLC, TXNRD2, CAT, HMGCS2, GCLM	140	240	19308	2.87321	1	0.771882	0.753011		GO:0009410	0.0954619	response to xenobiotic stimulus
GOTERM_BP_DIRECT	GO:0009743~response to carbohydrate	2	1.34228	0.0962351	ME1, G6PC1	140	14	19308	19.702	1	0.771882	0.753011		GO:0009743	0.0962351	response to carbohydrate
GOTERM_BP_DIRECT	GO:0060416~response to growth hormone	2	1.34228	0.0962351	TRIM16, HMGCS2	140	14	19308	19.702	1	0.771882	0.753011		GO:0060416	0.0962351	response to growth hormone
GOTERM_BP_DIRECT	GO:0090181~regulation of cholesterol metabolic process	2	1.34228	0.0962351	ACADVL, ACADL	140	14	19308	19.702	1	0.771882	0.753011		GO:0090181	0.0962351	regulation of cholesterol metabolic process
GOTERM_BP_DIRECT	GO:0006691~leukotriene metabolic process	2	1.34228	0.0962351	DPEP1, GGT1	140	14	19308	19.702	1	0.771882	0.753011		GO:0006691	0.0962351	leukotriene metabolic process
GOTERM_BP_DIRECT	GO:0006122~mitochondrial electron transport, ubiquinol to cytochrome c	2	1.34228	0.0962351	UQCRQ, UQCRH	140	14	19308	19.702	1	0.771882	0.753011		GO:0006122	0.0962351	mitochondrial electron transport, ubiquinol to cytochrome c
GOTERM_BP_DIRECT	GO:0065003~macromolecular complex assembly	4	2.68456	0.0970468	GCHFR, SLC9A3R2, DMTN, GLDC	140	152	19308	3.62932	1	0.771882	0.753011		GO:0065003	0.0970468	macromolecular complex assembly

## Sheet: Kidney(K)S2_K_Study1_dow
Rivigo GO reduction	Kidney studies 1 and 2 - proteomics downregulated
Category	Term	Count	%	PValue	Genes	List Total	Pop Hits	Pop Total	Fold Enrichment	Bonferroni	Benjamini	FDR		GO term	PValue	Term
GOTERM_CC_DIRECT	GO:0070062~extracellular exosome	275	38.3543	6.53837e-89	EIF4A1, RNH1, COL12A1, NUDT5, ENO2, LGALS3, LGALS1, CAPNS1, DPYSL2, FTH1, STMN1, CPNE3, PTGDS, B2M, SERPINF1, ACTN1, SERPINF2, KRT8, KRT7, MOGS, RNASE1, SND1, MTAP, PPA1, CDC37, PSME1, PSME2, SERPING1, TAGLN2, PFN1, TARS1, CFD, AARS1, IQGAP1, IQGAP2, ZMPSTE24, MYL12B, C6, PRDX4, S100A16, C9, EPB41L2, NCKAP1L, CD14, ARSB, S100A10, VASP, VAT1, LYN, GSTM2, GP2, FN1, PRG2, RAB27A, RAB27B, PA2G4, RPS2…	704	2218	20562	3.62129	4.31533e-86	4.31533e-86	3.64187e-86		GO:0070062	6.53837e-89	extracellular exosome
GOTERM_CC_DIRECT	GO:0005829~cytosol	367	51.1855	1.28766e-47	EIF4A2, EIF4A1, TES, RNH1, EIF4A3, IFI35, NUDT5, ENO2, RPL9, NUDT3, NUDT4, GOLGA3, LGALS3, RPS17, HERC2, LGALS1, CAPNS1, DPYSL2, FTH1, MAGOH, GOLGA1, DPYSL3, STMN1, TRIM25, CPNE3, B2M, RPS10, RBFOX2, MAP1S, ACTN1, KRT8, ALG2, KRT7, FNDC3A, SND1, CARHSP1, MTAP, KEL, PPA1, MAP1B, LARS1, CDC37, PSME1, PLBD1, PSME2, CD2BP2, TAGLN2, PFN1, MYL9, TARS1, AARS1, SET, RPN1, WDR61, IQGAP1, IQGAP2, GSPT2, GS…	704	5510	20562	1.94539	8.49854e-45	4.24927e-45	3.58613e-45		GO:0005829	1.28766e-47	cytosol
GOTERM_MF_DIRECT	GO:0003723~RNA binding	173	24.1283	9.28031e-45	EIF4A2, EIF4A1, TES, EIF4A3, HDLBP, C4BPA, HNRNPR, YARS1, RPL10A, RPL9, IPO5, TIAL1, LGALS3, RPS17, LGALS1, TRIM28, MAGOH, TRIM25, CPNE3, RPS10, PDIA3, RBFOX2, RPS7, RPS5, RPSA, FNDC3A, ILF2, SND1, PDIA4, DDX39A, NCL, FSCN1, SNRPG, PFN1, PPIB, KPNB1, LRRC59, MACF1, CNP, RPN1, CORO1A, GSPT2, GSPT1, HSP90B1, HNRNPDL, S100A16, TPR, SERPINH1, CSTF1, GCN1, FDPS, HSPA8, FUS, RCC2, PA2G4, EEF2, HARS2, E…	695	1471	18869	3.19299	7.92539e-42	7.93467e-42	7.48921e-42		GO:0003723	9.28031e-45	RNA binding
GOTERM_CC_DIRECT	GO:0016020~membrane	225	31.3808	9.88665e-44	EIF4A1, IFITM1, CMAS, EIF4A3, IFI35, SLC4A2, ENO2, RPL9, GOLGA3, LGALS3, RPS17, HERC2, CAPNS1, DPYSL2, STMN1, ARL6IP5, BCAP29, B2M, RPS10, ALG5, ALG2, MOGS, FNDC3A, SND1, DDX39A, PSME2, PFN1, MACF1, AARS1, RPN2, RPN1, ZMPSTE24, DYM, MLEC, NCKAP1L, S100A10, RCC2, RAB27A, PA2G4, AIMP1, HNRNPF, CALU, RPS20, HYOU1, HNRNPC, CALR, FERMT3, FKBP11, FKBP10, ARF4, FEN1, SH3KBP1, HEXB, HEXA, RPLP0, OLA1, PR…	704	2547	20562	2.58016	6.52519e-41	2.17506e-41	1.83562e-41		GO:0016020	9.88665e-44	membrane
GOTERM_CC_DIRECT	GO:0005925~focal adhesion	76	10.5997	1.84195e-32	TES, SH3KBP1, YWHAB, ITGB4, ARPC1B, RPLP0, ITGB2, TNC, SLC4A2, RPL10A, RPL9, MRC2, RPS17, YWHAQ, CFL1, ANXA6, CAPN2, RAC2, RPLP2, CPNE3, B2M, RPS10, YWHAG, JAK1, PDIA3, CAP1, ACTR2, MAP2K1, ANXA1, TPM4, RPS7, RPS5, ACTN1, ANXA5, ITGA1, YWHAZ, MYH9, CDH13, LCP1, PABPC1, PFN1, PPIB, CD44, PLEC, LRP1, RPL12, IQGAP1, CORO1B, HSP90B1, CORO1C, PDLIM1, PAK1, EPB41L2, RPS3, PTK2B, FLNA, FLNB, FLNC, RPS2,…	704	425	20562	5.22297	1.21569e-29	3.03923e-30	2.56492e-30		GO:0005925	1.84195e-32	focal adhesion
GOTERM_CC_DIRECT	GO:0005783~endoplasmic reticulum	119	16.5969	6.08572e-28	ERO1A, GOLT1B, PDCD6, PLOD2, HNRNPR, TMEM97, PLOD1, EEF1B2, NSDHL, CAPN2, PDIA3, MAP2K1, TAP2, TAP1, CNPY2, MOGS, PDIA6, PDIA4, TMX3, LARS1, DNAJB11, ERP29, FKBP9, PPIB, LRRC59, SET, TMED10, PDXDC1, RPN2, SAR1A, SEL1L, RPN1, ITPR2, PLD4, ITPR3, CD1D, HSP90B1, PRDX4, DDRGK1, SERPINH1, MLEC, SSR1, SEC31A, S100A10, TXNDC5, AMBP, HSPA5, MANF, AIMP1, TBL2, REEP5, TBXAS1, OGN, CALU, HYOU1, CALR, STT3B,…	704	1142	20562	3.0435	4.01657e-25	8.03315e-26	6.77949e-26		GO:0005783	6.08572e-28	endoplasmic reticulum
GOTERM_CC_DIRECT	GO:0005737~cytoplasm	322	44.9093	4.12804e-27	EIF4A1, TES, RNH1, EIF4A3, IFI35, RBPJ, RPL9, NUDT3, NUDT4, TIAL1, LGALS3, RPS17, HERC2, LGALS1, CAPNS1, TRIM29, DPYSL2, FTH1, MAGOH, DPYSL3, STMN1, CPNE3, RPS10, RBFOX2, ACTN1, KRT8, ALG2, KRT7, FNDC3A, SND1, SHTN1, CARHSP1, MTAP, DDX39A, PPA1, LARS1, CDC37, PSME1, PSME2, CD2BP2, ADPRS, TTLL12, PFN1, MYL9, TARS1, MACF1, AARS1, SET, IQGAP1, CD1D, IQGAP2, PLA2G7, GSPT1, MYL12B, PRDX4, PRRC1, S100A…	704	5576	20562	1.68665	2.72451e-24	4.54084e-25	3.8322e-25		GO:0005737	4.12804e-27	cytoplasm
GOTERM_BP_DIRECT	GO:0006413~translational initiation	28	3.90516	2.29665e-25	EIF4A2, EIF4A1, DDX3X, RPS17, RPS3, EIF4E, ABCF1, EIF5B, EIF2B3, RPS5, EIF2S1, EIF3M, EIF2S3, EIF3K, EIF3L, EIF3I, EIF3J, EIF3G, EIF3H, EIF3E, EIF3F, EIF3C, ABCE1, EIF3D, EIF4G3, EIF3A, EIF3B, EIF4G1	694	53	19308	14.6981	7.27577e-22	7.27348e-22	7.13568e-22		GO:0006413	2.29665e-25	translational initiation
GOTERM_MF_DIRECT	GO:0005515~protein binding	579	80.7531	3.11073e-24	TES, RNH1, CLEC10A, C4BPA, HNRNPR, TMEM97, RBPJ, ENO2, RPL9, SCAMP4, NSDHL, CAPNS1, DPYSL2, DPYSL3, STMN1, LUC7L, RBFOX2, MAP1S, SERPINF1, SERPINF2, RNASE1, SND1, MTAP, DDX39A, MAP1B, LARS1, PSME1, PSME2, SERPING1, ADPRS, TARS1, SET, RPN2, SAR1A, CTBP2, RPN1, IQGAP1, PRDX4, C6, S100A16, RDH11, C9, EPB41L2, SERPINH1, SSR1, NCKAP1L, S100A10, LYN, GSTM2, FN1, PA2G4, HNRNPF, HNRNPD, HYOU1, HNRNPC, GS…	695	12554	18869	1.25216	2.65657e-21	1.32984e-21	1.25518e-21		GO:0005515	3.11073e-24	protein binding
GOTERM_CC_DIRECT	GO:0005788~endoplasmic reticulum lumen	55	7.67085	1.30679e-23	ERO1A, FKBP10, COL14A1, PRKCSH, COL12A1, CTSZ, TNC, MYDGF, LGALS1, POGLUT3, B2M, CTSC, PDIA3, GPX7, APOA4, PDIA6, CKAP4, PDIA4, DNAJC3, RCN3, RCN1, COL6A2, COL6A1, DNAJB11, CANX, ERP29, COL8A1, SERPING1, VWA1, PPIB, COL15A1, SELENOF, HSP90B1, ERLEC1, GANAB, SPP1, SERPINH1, IGFBP7, UGGT1, ARSB, TXNDC5, HSPA5, SERPIND1, ERAP1, FN1, MANF, COL3A1, COL5A1, COL7A1, COL5A3, CALU, HYOU1, P4HB, CALR, FBN1	704	306	20562	5.24969	8.6248e-21	1.23211e-21	1.03983e-21		GO:0005788	1.30679e-23	endoplasmic reticulum lumen
GOTERM_CC_DIRECT	GO:0005576~extracellular region	152	21.1994	5.78295e-19	GMFG, COL12A1, TNC, F13A1, C4BPA, EPX, LGALS3, EFEMP2, LGALS1, EFEMP1, FTH1, FAM3C, PTGDS, B2M, NHLRC3, SERPINF1, ACTN1, CTRB1, SERPINF2, ILF2, PLBD1, COL8A1, SERPING1, TAGLN2, S100A9, KPNB1, CFD, FBLN1, REG3G, AEBP1, PLA2G7, FBLN5, HSP90B1, DPP7, PRDX4, C6, C9, IGFBP7, CD14, TBC1D15, ARSB, S100A10, TXNDC5, VAT1, HSPA8, CD163, AMBP, MCAM, FN1, PRG2, GP2, GGH, RAB27A, ARPC5, PA2G4, CYRIB, EEF2, NF…	704	2129	20562	2.08526	3.81675e-16	4.77093e-17	4.02638e-17		GO:0005576	5.78295e-19	extracellular region
GOTERM_MF_DIRECT	GO:0045296~cadherin binding	51	7.11297	1.56264e-18	TES, DDX3X, YWHAB, OLA1, HDLBP, GOLGA3, SLK, RACK1, EFHD2, TRIM25, LRRFIP1, SH3GLB1, RARS1, YWHAZ, SND1, EEF1G, SHTN1, EEF1D, CDH11, FSCN1, MYH9, CDH13, TAGLN2, PFN1, DBN1, PLEC, MACF1, LRRC59, PDXDC1, IQGAP1, CORO1B, KLC2, PUF60, CALD1, FLNA, FLNB, RPS2, PAK2, GCN1, VASP, HSPA8, HSPA5, STAT1, SEPTIN2, EEF2, SEPTIN9, SEPTIN7, EIF2S3, CAPZA1, EIF3E, HSPA1A	695	316	18869	4.38175	1.3345e-15	4.45353e-16	4.20351e-16		GO:0045296	1.56264e-18	cadherin binding
GOTERM_CC_DIRECT	GO:0033290~eukaryotic 48S preinitiation complex	14	1.95258	3.95757e-17	EIF2S1, EIF3M, EIF3K, EIF3L, EIF3I, EIF3J, EIF3G, EIF3H, EIF3E, EIF3F, EIF3C, EIF3D, EIF3A, EIF3B	704	16	20562	25.5565	2.612e-14	2.90222e-15	2.4493e-15		GO:0033290	3.95757e-17	eukaryotic 48S preinitiation complex
GOTERM_CC_DIRECT	GO:0042470~melanosome	28	3.90516	6.01576e-17	TMED10, CNP, YWHAB, RPN1, HSP90B1, GANAB, ANXA6, MYH11, CTSD, PDIA3, HSPA8, HSPA5, ANXA2, SERPINF1, GGH, RAB27A, NAP1L1, RAB27B, PDIA6, YWHAZ, SND1, PDIA4, CANX, ERP29, CALU, P4HB, SEC22B, PPIB	704	103	20562	7.93987	7.32747e-14	3.9704e-15	3.35078e-15		GO:0042470	6.01576e-17	melanosome
GOTERM_CC_DIRECT	GO:0005789~endoplasmic reticulum membrane	91	12.6918	7.13503e-16	ERO1A, ADPGK, PDCD6, TECR, PLOD2, PLOD1, UFL1, SEC61A1, NSDHL, SPTLC1, SEC61G, ARL6IP5, RAC2, TMED3, BCAP29, ANXA7, TMED2, SEC61B, PTGFRN, PTGDS, NOMO1, EIF5A, TMED9, SSR4, ALG5, SSR3, TAP2, ALG2, CYBB, COPZ2, TAP1, MOGS, CYP7B1, PDIA6, CKAP4, DDOST, TMX3, TMEM214, DAD1, CANX, SEC22B, COPB2, PON3, LRRC59, NBAS, COPA, SEC23A, TMED10, RPN2, UBA5, COPB1, SEL1L, RPN1, PLD4, ITPR2, ITPR3, CD1D, SRI, P…	704	1054	20562	2.5217	4.39648e-13	4.28102e-14	3.61292e-14		GO:0005789	7.13503e-16	endoplasmic reticulum membrane
GOTERM_CC_DIRECT	GO:0005852~eukaryotic translation initiation factor 3 complex	13	1.81311	3.69595e-15	EIF3M, EIF3K, EIF3L, EIF3I, EIF3J, EIF3G, EIF3H, EIF3E, EIF3F, EIF3C, EIF3D, EIF3A, EIF3B	704	16	20562	23.731	2.41807e-12	2.03277e-13	1.71554e-13		GO:0005852	3.69595e-15	eukaryotic translation initiation factor 3 complex
GOTERM_MF_DIRECT	GO:0003743~translation initiation factor activity	22	3.06834	5.16451e-15	EIF4A2, EIF5B, EIF4A1, EIF2B3, EIF2S1, EIF3M, EIF2S3, EIF3K, EIF3L, EIF3I, EIF3J, EIF3G, EIF3H, EIF3E, EIF3F, EIF3C, EIF4G3, EIF3D, EIF4E, EIF3A, EIF3B, EIF4G1	695	64	18869	9.33269	4.45621e-12	1.10392e-12	1.04194e-12		GO:0003743	5.16451e-15	translation initiation factor activity
GOTERM_BP_DIRECT	GO:0001732~formation of cytoplasmic translation initiation complex	13	1.81311	2.1879e-14	EIF3M, EIF3K, EIF3L, EIF3I, EIF3J, EIF3G, EIF3H, EIF3E, EIF3F, EIF3C, EIF3D, EIF3A, EIF3B	694	17	19308	21.2751	6.92886e-11	3.46454e-11	3.3989e-11		GO:0001732	2.1879e-14	formation of cytoplasmic translation initiation complex
GOTERM_CC_DIRECT	GO:0016282~eukaryotic 43S preinitiation complex	13	1.81311	3.57606e-14	EIF3M, EIF3K, EIF3L, EIF3I, EIF3J, EIF3G, EIF3H, EIF3E, EIF3F, EIF3C, EIF3D, EIF3A, EIF3B	704	18	20562	21.0942	2.35945e-11	1.81554e-12	1.5322e-12		GO:0016282	3.57606e-14	eukaryotic 43S preinitiation complex
GOTERM_CC_DIRECT	GO:0005615~extracellular space	130	18.1311	7.56453e-14	ERO1A, COL12A1, TNC, F13A1, C4BPA, IFI35, EPX, YARS1, ENO2, LGALS3, EFEMP2, LGALS1, EFEMP1, ARHGDIA, DPYSL3, CFL1, LAMP2, FAM3C, PTGDS, B2M, PDIA3, POSTN, SERPINF1, ACTN1, CTRB1, SERPINF2, PDIA6, PDIA4, DNAJB11, PLBD1, COL8A1, SERPING1, ZG16, S100A9, CFD, COPA, CPB1, CNP, DPT, FBLN1, REG3G, CD1D, AEBP1, FBLN5, PRDX4, C6, S100A16, C9, SERPINH1, IGFBP7, CD14, S100A10, HSPA8, AMBP, MCAM, FN1, GP2, G…	704	1938	20562	1.95922	4.99001e-11	3.56614e-12	3.0096e-12		GO:0005615	7.56453e-14	extracellular space
GOTERM_CC_DIRECT	GO:1904813~ficolin-1-rich granule lumen	27	3.76569	8.11899e-14	CFD, ASAH1, DDX3X, MVP, GMFG, CTSZ, CTSS, HK3, PRDX4, FTH1, GUSB, CTSD, ARSB, HSPA8, ACTR2, PRG2, PDAP1, ARPC5, EEF2, ILF2, PSMA5, IMPDH1, IMPDH2, PLEKHO2, HSPA1B, KPNB1, HSPA1A	704	124	20562	6.35967	5.35638e-11	3.57236e-12	3.01485e-12		GO:1904813	8.11899e-14	ficolin-1-rich granule lumen
GOTERM_CC_DIRECT	GO:1990904~ribonucleoprotein complex	32	4.46304	1.55078e-13	TOP2A, MVP, RPLP0, EIF4A3, HNRNPR, IQGAP1, ELAVL1, TIAL1, SYNCRIP, PUF60, RUVBL2, NUP62, RPS3, HNRNPA1, HSPA8, HNRNPA3, RPS7, RPS5, PA2G4, EEF2, ILF2, NCL, HNRNPF, HNRNPA2B1, SNRPG, HNRNPD, RPL22L1, HNRNPH2, VIM, PABPC1, HSPA1B, HSPA1A	704	183	20562	5.1073	1.02365e-10	6.39697e-12	5.39865e-12		GO:1990904	1.55078e-13	ribonucleoprotein complex
GOTERM_MF_DIRECT	GO:0051015~actin filament binding	36	5.02092	5.34364e-13	MACF1, WDR1, ARPC1B, IQGAP1, IQGAP2, CORO1A, CORO1B, CORO1C, CFL1, MYO18A, ANXA6, FLNA, FLNB, MYH11, FLNC, MYH10, ACTR2, TPM4, TPM3, MAP1S, TPM2, ACTN1, TPM1, HIP1R, ARPC5, EEF2, SHTN1, MARCKS, ARPC2, CAPZA1, FSCN1, MYH9, LCP1, DBN1, MYO1F, PLEC	695	226	18869	4.32472	4.56335e-10	9.13762e-11	8.62463e-11		GO:0051015	5.34364e-13	actin filament binding
GOTERM_CC_DIRECT	GO:0043202~lysosomal lumen	23	3.20781	1.24488e-12	HSPA8, ASAH1, LUM, HEXB, GAA, HEXA, BGN, PRELP, DCN, CTSS, PLD3, CTSL, OGN, LAMP2, NAAA, CSPG4, MAN2B1, HPSE, GUSB, CTSD, ARSB, LGMN, TXNDC5	704	97	20562	6.92546	8.21629e-10	4.83305e-11	4.07881e-11		GO:0043202	1.24488e-12	lysosomal lumen
GOTERM_CC_DIRECT	GO:0005793~endoplasmic reticulum-Golgi intermediate compartment	21	2.92887	1.87968e-12	TMED9, TMED10, HSPA5, COPB1, DDHD2, FN1, PDIA6, MYDGF, LMAN1, SEC23IP, MYO18A, SERPINH1, TMED3, TRIP11, TMED2, COPG1, P4HB, SEC22B, UGGT1, ERGIC1, NUCB2	704	80	20562	7.66694	1.24061e-09	6.89217e-11	5.81658e-11		GO:0005793	1.87968e-12	endoplasmic reticulum-Golgi intermediate compartment
GOTERM_MF_DIRECT	GO:0042802~identical protein binding	121	16.8759	2.73459e-12	RIPOR2, SMARCB1, PDCD6, IFI35, NUDT5, ENO2, STK10, SLK, LGALS1, TRIM29, DPYSL2, RUVBL2, FTH1, DPYSL3, LUC7L, B2M, MAP3K5, PDIA3, SH3GLB1, TPM4, MAP1S, TPM2, TPM1, SHTN1, DDX39A, NCL, PSME2, TARS1, CTBP2, FBLN1, STK4, CORO1A, CORO1B, PRDX4, HARS1, CBX3, FUS, CBX1, FN1, ASNS, HARS2, NFKB1, HNRNPC, GSTM5, FBN1, EIF4G1, B4GALT1, YWHAB, HEXB, PRPF19, IMPA1, YWHAQ, CASP6, C1QTNF5, ANXA6, CASP1, EMILIN1…	695	1714	18869	1.91663	2.33534e-09	3.89679e-10	3.67802e-10		GO:0042802	2.73459e-12	identical protein binding
GOTERM_BP_DIRECT	GO:0006888~ER to Golgi vesicle-mediated transport	26	3.62622	5.40912e-12	ARF4, COPB2, COPA, SEC23A, TMED10, GOLT1B, SAR1A, PDCD6, COPB1, LMAN1, SCFD1, TMED3, TMED2, BCAP29, SEC23B, SEC31A, TMED9, ARCN1, SEC23IP, TRIP11, HYOU1, COPG1, SEC24D, SEC22B, ERGIC1, COPE	694	130	19308	5.56427	1.71361e-08	5.71023e-09	5.60205e-09		GO:0006888	5.40912e-12	ER to Golgi vesicle-mediated transport
GOTERM_MF_DIRECT	GO:0043022~ribosome binding	20	2.7894	6.30568e-12	EIF5A, RPN2, HSPA5, OLA1, RPSA, SRP68, EEF2, EIF2S1, SEC61A1, SPCS1, EIF3K, SRP72, SEC61G, RACK1, ETF1, SEC61B, EIF3C, GCN1, NOMO1, ABCF1	695	71	18869	7.64779	5.3851e-09	7.70194e-10	7.26955e-10		GO:0043022	6.30568e-12	ribosome binding
GOTERM_MF_DIRECT	GO:0005201~extracellular matrix structural constituent	25	3.48675	2.13795e-10	COL15A1, LAMA2, COL14A1, TNC, DPT, FBLN1, PRELP, AEBP1, EFEMP2, EFEMP1, IGFBP7, EMILIN1, POSTN, LUM, FN1, BGN, GP2, MFAP4, COL3A1, COL5A1, COL5A3, PXDN, COL8A1, VWA1, FBN1	695	138	18869	4.91841	1.82581e-07	2.28493e-08	2.15666e-08		GO:0005201	2.13795e-10	extracellular matrix structural constituent
GOTERM_CC_DIRECT	GO:0001725~stress fiber	18	2.51046	2.90891e-10	TPM4, TPM3, ACTN1, TPM1, SORBS1, SEPTIN9, SEPTIN11, CORO1B, SEPTIN7, MYL12B, PDLIM1, FSCN1, MYH9, FLNB, LCP1, MYH10, PDLIM4, MYL9	704	73	20562	7.20182	1.91988e-07	1.01046e-08	8.52769e-09		GO:0001725	2.90891e-10	stress fiber
GOTERM_MF_DIRECT	GO:0003779~actin binding	40	5.5788	2.95981e-10	MACF1, ARPC1B, GMFG, LSP1, IQGAP2, CORO1A, PDLIM1, CALD1, EPB41L2, CFL1, FLNB, MYH10, PDLIM4, YWHAH, VASP, CAP1, ACTR2, TPM4, TPM3, MAP1S, TPM2, ACTN1, TPM1, HIP1R, SORBS1, ARPC5, DIAPH1, MARCKS, ARPC2, MAP1B, CAPZA1, FSCN1, MYH9, LCP1, P4HB, PFN1, DBN1, MYO1F, RAI14, PLEC	695	339	18869	3.2035	2.52768e-07	2.81182e-08	2.65396e-08		GO:0003779	2.95981e-10	actin binding
GOTERM_BP_DIRECT	GO:0006418~tRNA aminoacylation for protein translation	12	1.67364	3.31622e-10	GARS1, AARS1, HARS1, RARS1, NARS1, KARS1, LARS1, MARS1, IARS1, YARS1, HARS2, VARS1	694	25	19308	13.3542	1.05058e-06	2.29175e-07	2.24834e-07		GO:0006418	3.31622e-10	tRNA aminoacylation for protein translation
GOTERM_BP_DIRECT	GO:0002181~cytoplasmic translation	20	2.7894	3.61818e-10	RWDD1, RPS7, RPS5, RPL12, RPL11, RPLP0, RPSA, RPL10A, RPL9, RPS17, RPS28, RPS15A, RPS3, RACK1, RPLP2, RPS20, RPL22L1, RPS2, RPS21, RPS10	694	90	19308	6.18252	1.14624e-06	2.29175e-07	2.24834e-07		GO:0002181	3.61818e-10	cytoplasmic translation
GOTERM_BP_DIRECT	GO:0006412~translation	31	4.32357	4.82236e-10	RPL12, RPLP0, RPL11, RRBP1, RPL10A, GSPT2, RPL9, GSPT1, RPS17, RPS15A, RACK1, RPS3, RPLP2, RPS2, RPS10, GCN1, ABCF1, HARS1, RPS7, RPS5, RPSA, HARS2, DARS1, AIMP1, RPS28, SARS1, NACA, RPS20, RPL22L1, RPS21, EIF4G1	694	223	19308	3.86754	1.52772e-06	2.5454e-07	2.49718e-07		GO:0006412	4.82236e-10	translation
GOTERM_CC_DIRECT	GO:0005856~cytoskeleton	50	6.9735	5.96721e-10	RIPOR2, SH3KBP1, SEPTIN11, ARHGDIA, DPYSL2, ARHGDIB, ARL6IP5, RAC2, LRRFIP1, JAK1, TPM4, TPM3, TPM2, TPM1, CKAP4, FSCN1, TAGLN2, PFN1, S100A9, DBN1, RAI14, PLEC, MACF1, LRP1, ROCK2, MVP, CORO1A, CORO1B, PDLIM1, CALD1, EPB41L2, PDE6D, PTK2B, FLNC, PDLIM4, VASP, HIP1R, KRT12, SEPTIN4, TUBB4B, SEPTIN9, DEF6, SEPTIN7, SEPTIN8, KRT19, KRT18, CAPZA1, TRIP11, VIM, P4HB	704	541	20562	2.69939	3.93836e-07	1.96918e-08	1.66187e-08		GO:0005856	5.96721e-10	cytoskeleton
GOTERM_CC_DIRECT	GO:0030133~transport vesicle	20	2.7894	1.0812e-09	COPB2, COPA, TMED9, TMED10, YIPF3, COPB1, RAB3D, PRG2, BGN, COPZ2, ARCN1, C1QTNF5, ERP29, TMED3, TRIP11, TMED2, COPG1, AP3S1, SEC22B, COPE	704	100	20562	5.84148	7.13589e-07	3.39804e-08	2.86774e-08		GO:0030133	1.0812e-09	transport vesicle
GOTERM_CC_DIRECT	GO:0035578~azurophil granule lumen	19	2.64993	1.50165e-09	CAP1, VAT1, ACTR2, ANXA2, NHLRC3, HEXB, GGH, PA2G4, TUBB4B, DNAJC3, DPP7, TTR, IMPDH1, MAN2B1, AGA, GUSB, CTSC, ARSB, TXNDC5	704	91	20562	6.09825	9.91086e-07	4.50494e-08	3.8019e-08		GO:0035578	1.50165e-09	azurophil granule lumen
GOTERM_CC_DIRECT	GO:0005938~cell cortex	25	3.48675	2.1717e-09	NUMA1, CTSZ, ITPR2, ENO2, CORO1A, MYL12B, CORO1C, EPB41L2, RAC2, PTK2B, FLNA, FLNB, MYH10, GLRX3, ANXA2, SEPTIN2, GAD1, HIP1R, MARCKS, NCL, NEDD4, FSCN1, PFN1, MYL9, RAI14	704	165	20562	4.42536	1.43332e-06	6.23185e-08	5.2593e-08		GO:0005938	2.1717e-09	cell cortex
GOTERM_MF_DIRECT	GO:0005518~collagen binding	17	2.37099	2.33376e-09	COL14A1, LUM, ITGA1, FN1, AEBP1, DCN, CTSS, MMP12, MRC2, PAK1, CTSL, COL6A2, COL5A3, COL6A1, SERPINH1, PPIB, CD44	695	68	18869	6.78741	1.99303e-06	1.99536e-07	1.88334e-07		GO:0005518	2.33376e-09	collagen binding
GOTERM_MF_DIRECT	GO:0005525~GTP binding	42	5.85774	3.1134e-09	ARF4, GUCY1B1, RAB3A, ATL3, SAR1A, GFM2, RAB3D, SRP54, OLA1, GIMAP4, GSPT2, SEPTIN11, GSPT1, GMPPB, TUBA1C, TUBB6, TUBB3, ANXA6, RAC2, GBP2, RAB6A, RAB8A, RAB8B, EIF5B, GUCY1A1, SEPTIN2, RAB27A, RAB27B, SEPTIN4, TUBB4B, EEF2, SEPTIN9, IRGM, SEPTIN7, SEPTIN8, RAB33B, TUBB2B, NIN, TUBB2A, EIF2S3, RAB13, SRPRA	695	399	18869	2.85786	2.65884e-06	2.41996e-07	2.2841e-07		GO:0005525	3.1134e-09	GTP binding
GOTERM_CC_DIRECT	GO:0015629~actin cytoskeleton	31	4.32357	5.27511e-09	MACF1, WDR1, ARPC1B, LSP1, IQGAP1, IQGAP2, CORO1A, CORO1C, CALD1, CFL1, FLNA, FLNB, VASP, ACTR2, TPM3, SEPTIN2, TPM2, TPM1, ALG2, ARPC5, SEPTIN9, NPM3, MARCKS, ARPC2, CAPZA1, FSCN1, MYH9, LCP1, HNRNPC, DBN1, MYO1F	704	258	20562	3.50941	3.48157e-06	1.45066e-07	1.22427e-07		GO:0015629	5.27511e-09	actin cytoskeleton
GOTERM_CC_DIRECT	GO:0071541~eukaryotic translation initiation factor 3 complex, eIF3m	7	0.97629	1.0633e-08	EIF3M, EIF3I, EIF3H, EIF3F, EIF3D, EIF3A, EIF3B	704	7	20562	29.2074	7.01774e-06	2.8071e-07	2.36903e-07		GO:0071541	1.0633e-08	eukaryotic translation initiation factor 3 complex, eIF3m
GOTERM_BP_DIRECT	GO:0034975~protein folding in endoplasmic reticulum	8	1.11576	2.16726e-08	ERO1A, DNAJC3, PDIA3, HSPA5, CANX, P4HB, CALR, HSP90B1	694	11	19308	20.2337	6.86566e-05	9.80533e-06	9.61956e-06		GO:0034975	2.16726e-08	protein folding in endoplasmic reticulum
GOTERM_CC_DIRECT	GO:0048471~perinuclear region of cytoplasm	58	8.08926	2.95305e-08	EIF4A2, RAB3A, YWHAB, YBX3, SLK, LAMP2, GOLGA1, RACK1, ANXA6, PTGDS, RAB8B, ANXA2, MAP1S, ANXA4, SERPINF1, PDE4C, ALG2, CKAP4, SHTN1, ALDH1A2, MAP1B, CDH13, LCP1, PPIB, PLEC, SEC23A, SET, CNP, MVP, CORO1B, HSP90B1, TRA2B, LMNA, SPP1, PTK2B, FLNA, GBP2, EIF4E, PAK2, SEC23B, PDLIM4, SEC31A, LYN, HSPA8, FUS, STAT1, SEPTIN2, HIP1R, SEPTIN9, DEF6, MANF, KRT18, NEDD4, EIF3G, CALR, HSPA1B, LGMN, HSPA1A	704	764	20562	2.21731	1.94899e-05	7.49621e-07	6.32634e-07		GO:0048471	2.95305e-08	perinuclear region of cytoplasm
GOTERM_MF_DIRECT	GO:0003924~GTPase activity	37	5.16039	4.05718e-08	ARF4, RAB3A, DDX3X, ATL3, SAR1A, GFM2, RAB3D, SRP54, GSPT2, SEPTIN11, GSPT1, TUBA1C, TUBB6, TUBB3, ARHGDIB, RAC2, GBP2, RAB6A, RAB8A, RAB8B, EIF5B, SEPTIN2, RAB27A, RAB27B, SEPTIN4, TUBB4B, EEF2, SEPTIN9, IRGM, SEPTIN7, SEPTIN8, RAB33B, TUBB2B, TUBB2A, EIF2S3, RAB13, SRPRA	695	355	18869	2.82968	3.46477e-05	2.89074e-06	2.72845e-06		GO:0003924	4.05718e-08	GTPase activity
GOTERM_CC_DIRECT	GO:0071013~catalytic step 2 spliceosome	17	2.37099	5.08091e-08	HNRNPA3, EIF4A3, SRSF1, U2AF1, HNRNPR, PRPF19, LSM2, SART1, SYNCRIP, HNRNPF, HNRNPA2B1, MAGOH, SNRPG, PABPC1, HNRNPC, HNRNPA1, RBM22	704	89	20562	5.57894	3.35335e-05	1.242e-06	1.04817e-06		GO:0071013	5.08091e-08	catalytic step 2 spliceosome
GOTERM_MF_DIRECT	GO:0051082~unfolded protein binding	21	2.92887	6.69259e-08	APCS, HSPA8, HSPA5, TUBB4B, NAP1L4, HSP90B1, ERLEC1, LMAN1, NACA, CDC37, RUVBL2, DNAJB11, CANX, SERPINH1, HYOU1, CALR, PPIB, SRSF10, UGGT1, HSPA1B, HSPA1A	695	131	18869	4.35223	5.71531e-05	4.40166e-06	4.15455e-06		GO:0051082	6.69259e-08	unfolded protein binding
GOTERM_CC_DIRECT	GO:0030126~COPI vesicle coat	8	1.11576	7.60144e-08	COPB2, COPA, COPB1, TMED3, COPZ2, COPG1, COPE, ARCN1	704	13	20562	17.9738	5.01682e-05	1.79177e-06	1.51214e-06		GO:0030126	7.60144e-08	COPI vesicle coat
GOTERM_BP_DIRECT	GO:0009306~protein secretion	14	1.95258	8.36517e-08	RAB3A, TMEM167A, RAB3D, SEL1L, ARFGAP3, PDIA4, RCN3, RAB13, CANX, C1QTNF5, ERP29, COPG1, RAB8A, RAB8B	694	57	19308	6.83331	0.000264974	3.31156e-05	3.24882e-05		GO:0009306	8.36517e-08	protein secretion
GOTERM_CC_DIRECT	GO:0033116~endoplasmic reticulum-Golgi intermediate compartment membrane	16	2.23152	8.8034e-08	TMED9, TMED10, CTSZ, TAP2, TAP1, COPZ2, VMP1, LMAN1, COL7A1, TMED3, TRIP11, TMED2, CALR, SEC22B, ERGIC1, CTSC	704	81	20562	5.76936	5.81008e-05	2.00353e-06	1.69086e-06		GO:0033116	8.8034e-08	endoplasmic reticulum-Golgi intermediate compartment membrane
GOTERM_CC_DIRECT	GO:0030134~ER to Golgi transport vesicle	12	1.67364	1.12307e-07	LMAN1, TMED9, SEC23IP, TMED10, COL7A1, CTSZ, DDHD2, TMED3, TMED2, CTSC, ERGIC1, SEC31A	704	42	20562	8.34497	7.41197e-05	2.47075e-06	2.08516e-06		GO:0030134	1.12307e-07	ER to Golgi transport vesicle
GOTERM_CC_DIRECT	GO:0008250~oligosaccharyltransferase complex	8	1.11576	1.47537e-07	KRTCAP2, RPN2, DAD1, RPN1, STT3A, MLEC, STT3B, DDOST	704	14	20562	16.6899	9.73694e-05	3.1411e-06	2.6509e-06		GO:0008250	1.47537e-07	oligosaccharyltransferase complex
GOTERM_MF_DIRECT	GO:0030020~extracellular matrix structural constituent conferring tensile strength	12	1.67364	1.77589e-07	COL3A1, COL15A1, COL5A1, COL14A1, COL6A2, COL5A3, COL7A1, COL12A1, COL6A1, COL8A1, COL6A6, COL6A5	695	41	18869	7.94624	0.000151649	1.08456e-05	1.02367e-05		GO:0030020	1.77589e-07	extracellular matrix structural constituent conferring tensile strength
GOTERM_CC_DIRECT	GO:0030027~lamellipodium	24	3.34728	1.8698e-07	VASP, ACTR2, DDX3X, ARPC5, IQGAP2, CORO1A, CORO1B, CORO1C, SHTN1, PAK1, ARPC2, TUBB3, CFL1, RAB13, DPYSL3, FSCN1, ANGPTL3, RAC2, PTK2B, PABPC1, P4HB, MYH10, PDLIM4, DBN1	704	192	20562	3.65092	0.0001234	3.85647e-06	3.25463e-06		GO:0030027	1.8698e-07	lamellipodium
GOTERM_BP_DIRECT	GO:0006457~protein folding	23	3.20781	2.45468e-07	PDIA3, ERO1A, APCS, FKBP10, HSPA8, MOGS, PDIA6, PDIA4, HSP90B1, FKBP1A, LMAN1, CDC37, RUVBL2, DNAJB11, CANX, ERP29, HYOU1, FKBP9, P4HB, CALR, PPIB, ENGASE, TXNDC5	694	172	19308	3.72029	0.000777342	8.63776e-05	8.47412e-05		GO:0006457	2.45468e-07	protein folding
GOTERM_BP_DIRECT	GO:0000398~mRNA splicing, via spliceosome	25	3.48675	2.84644e-07	DDX46, SRSF1, EIF4A3, U2AF1, HNRNPR, PRPF19, SART1, SYNCRIP, U2AF2, TRA2B, TRA2A, MAGOH, HNRNPA1, SRSF10, HSPA8, HNRNPA3, LSM2, LSM8, DDX39A, HNRNPF, HNRNPA2B1, SNRPG, PABPC1, HNRNPC, RBM22	694	202	19308	3.44323	0.000901345	9.01466e-05	8.84388e-05		GO:0000398	2.84644e-07	mRNA splicing, via spliceosome
GOTERM_CC_DIRECT	GO:0022626~cytosolic ribosome	15	2.09205	3.00016e-07	RPS7, RPS5, RPL12, RPL11, RPLP0, RPSA, RPL10A, RPL9, RPS17, RPS15A, RPS3, RPS20, RPS2, RPS21, RPS10	704	77	20562	5.68975	0.000197991	5.76502e-06	4.86532e-06		GO:0022626	3.00016e-07	cytosolic ribosome
GOTERM_CC_DIRECT	GO:0005844~polysome	11	1.53417	3.08994e-07	RWDD1, FUS, RPS3, HDLBP, VIM, CALR, EEF2, MYH10, EIF2S1, GCN1, EIF4G1	704	37	20562	8.68328	0.000203916	5.76502e-06	4.86532e-06		GO:0005844	3.08994e-07	polysome
GOTERM_CC_DIRECT	GO:0022627~cytosolic small ribosomal subunit	12	1.67364	3.09008e-07	RPS17, RPS28, RPS15A, RPS7, RPS5, RPS3, RACK1, RPS20, RPSA, RPS2, RPS21, RPS10	704	46	20562	7.61932	0.000203925	5.76502e-06	4.86532e-06		GO:0022627	3.09008e-07	cytosolic small ribosomal subunit
GOTERM_CC_DIRECT	GO:0030667~secretory granule membrane	17	2.37099	3.14455e-07	RAB3A, B4GALT1, TMED10, COPB1, RAB27A, ITPR2, ITPR3, IQGAP1, IQGAP2, DIAPH1, LGALS3, PTPRC, ITGAX, NCKAP1L, CD14, RAB6A, CD44	704	101	20562	4.91609	0.000207519	5.76502e-06	4.86532e-06		GO:0030667	3.14455e-07	secretory granule membrane
GOTERM_MF_DIRECT	GO:0005200~structural constituent of cytoskeleton	18	2.51046	3.58148e-07	ACTR2, ARPC1B, TPM1, ARPC5, TUBB4B, LMNB1, TUBA1C, TUBB6, KRT19, TUBB2B, DES, TUBB2A, ARPC2, TUBB3, LMNA, VIM, PLEC, PRPH	695	107	18869	4.56723	0.000305812	2.04144e-05	1.92684e-05		GO:0005200	3.58148e-07	structural constituent of cytoskeleton
GOTERM_MF_DIRECT	GO:0005198~structural molecule activity	24	3.34728	4.10925e-07	MACF1, COPB2, COPA, LAMA2, NUMA1, ROCK2, COPB1, KRT12, SEPTIN4, KRT75, SEPTIN7, LMNB1, TUBA1C, KRT19, KRT18, MAP1B, EPB41L2, LMNA, COPG1, COPE, EIF3A, SEC31A, PLEC, PRPH	695	187	18869	3.48445	0.000350868	2.11622e-05	1.99742e-05		GO:0005198	4.10925e-07	structural molecule activity
GOTERM_MF_DIRECT	GO:0019899~enzyme binding	37	5.16039	4.2077e-07	TOP2A, HDAC2, PCNA, YWHAB, SLC4A2, ENO2, PPP3CA, PPP3CB, U2AF2, LAMP2, RACK1, RPS3, CAPN2, DYM, MLEC, RPS2, EIF4E, PMS1, YWHAH, LYN, HSPA8, GSTM2, GSTM1, PARP1, HSPA5, CBX3, STAT1, CBX1, FN1, NFKB1, SARS1, NEDD4, P4HB, HSPA1B, LUC7L2, KPNB1, HSPA1A	695	390	18869	2.57574	0.000359273	2.11622e-05	1.99742e-05		GO:0019899	4.2077e-07	enzyme binding
GOTERM_MF_DIRECT	GO:0005178~integrin binding	22	3.06834	4.89084e-07	LYN, ITGAM, ITGB4, ACTN1, ITGB2, ITGA1, FN1, FBLN1, FBLN5, COL3A1, COL5A1, GPNMB, ANGPTL3, ITGAX, SPP1, MYH9, ANXA7, LCP1, P4HB, CALR, FBN1, FERMT3	695	161	18869	3.70989	0.000417591	2.32315e-05	2.19273e-05		GO:0005178	4.89084e-07	integrin binding
GOTERM_CC_DIRECT	GO:0034663~endoplasmic reticulum chaperone complex	7	0.97629	6.23789e-07	HSPA5, DNAJB11, HYOU1, P4HB, PPIB, PDIA6, HSP90B1	704	11	20562	18.5865	0.000411616	1.11271e-05	9.39056e-06		GO:0034663	6.23789e-07	endoplasmic reticulum chaperone complex
GOTERM_CC_DIRECT	GO:0030018~Z disc	19	2.64993	7.39303e-07	GLRX3, ACTN1, KRT8, SRI, MYL12B, PDLIM1, FKBP1A, PPP3CA, PAK1, KRT19, PPP3CB, DES, FLNA, FLNB, FLNC, PDLIM4, MYL9, FBP2, PLEC	704	134	20562	4.14135	0.000487821	1.28405e-05	1.08366e-05		GO:0030018	7.39303e-07	Z disc
GOTERM_CC_DIRECT	GO:0032991~macromolecular complex	51	7.11297	8.77551e-07	TOP2A, FEN1, IFITM1, TES, SMARCB1, RAB3A, B4GALT1, NUMA1, GOLT1B, UFL1, TRIM28, YWHAQ, DPYSL2, CASP1, MAP3K5, SH3GLB1, ANXA1, PARP1, ANXA2, RPS7, ACTL6A, COL6A2, COL6A1, CANX, MYH9, PPIB, HDAC2, SET, RPL11, IQGAP1, STK4, CORO1A, HSP90B1, ZMPSTE24, PAK1, KLC2, TTR, TRA2B, UGGT1, HSPA5, STAT1, KRT18, NEDD4, PTPN6, SUGT1, P4HB, PKN1, HNRNPC, STT3B, HSPA1B, HSPA1A	704	703	20562	2.11889	0.000579016	1.48509e-05	1.25332e-05		GO:0032991	8.77551e-07	macromolecular complex
GOTERM_CC_DIRECT	GO:0005764~lysosome	30	4.1841	9.79881e-07	ASAH1, RAB3A, HEXB, PON2, HEXA, CTSZ, CD1D, TMEM97, CTSS, TIAL1, TRIM29, CTSL, LAMP2, CAPN2, AGA, SIAE, CTSD, ARSB, CTSC, HSPA8, GAA, RAB27A, LARS1, NAAA, PLBD1, MAN2B1, HPSE, CALR, LGMN, PCYOX1	704	309	20562	2.83567	0.000646513	1.6168e-05	1.36448e-05		GO:0005764	9.79881e-07	lysosome
GOTERM_CC_DIRECT	GO:0017101~aminoacyl-tRNA synthetase multienzyme complex	7	0.97629	1.21143e-06	AIMP1, RARS1, KARS1, LARS1, MARS1, IARS1, DARS1	704	12	20562	17.0376	0.000799223	1.9501e-05	1.64577e-05		GO:0017101	1.21143e-06	aminoacyl-tRNA synthetase multienzyme complex
GOTERM_MF_DIRECT	GO:0003729~mRNA binding	27	3.76569	1.4316e-06	EIF4A1, DDX3X, SRSF1, EIF4A3, HDLBP, HNRNPR, ELAVL1, PTBP1, SYNCRIP, TRA2B, TPR, RPS3, LUC7L, RPS2, HNRNPA3, RBFOX2, CNBP, RPS5, TSN, FUBP1, STRAP, PABPC1, CALR, EIF4G3, EIF3A, LUC7L2, EIF4G1	695	246	18869	2.97984	0.00122184	6.4422e-05	6.08053e-05		GO:0003729	1.4316e-06	mRNA binding
GOTERM_BP_DIRECT	GO:0006890~retrograde vesicle-mediated transport, Golgi to ER	12	1.67364	1.51202e-06	ARF4, COPB2, COPA, SCFD1, NBAS, TMED10, COPZ2, SEC22B, RAB6A, COPE, ERGIC1, ARCN1	694	51	19308	6.54619	0.00477863	0.000423171	0.000415154		GO:0006890	1.51202e-06	retrograde vesicle-mediated transport, Golgi to ER
GOTERM_BP_DIRECT	GO:0034976~response to endoplasmic reticulum stress	15	2.09205	1.60343e-06	PDIA3, ERO1A, NIBAN1, UBA5, EEF2, EIF2S1, PDIA6, PDIA4, HSP90B1, UFL1, MARCKS, DDRGK1, HYOU1, P4HB, MAP3K5	694	84	19308	4.96809	0.00506678	0.000423171	0.000415154		GO:0034976	1.60343e-06	response to endoplasmic reticulum stress
GOTERM_CC_DIRECT	GO:0005790~smooth endoplasmic reticulum	9	1.25523	2.23728e-06	DNAJC3, PRDX4, HSPA5, CANX, ERP29, HYOU1, CALR, SRI, PPIB	704	27	20562	9.7358	0.00147552	3.51573e-05	2.96706e-05		GO:0005790	2.23728e-06	smooth endoplasmic reticulum
GOTERM_CC_DIRECT	GO:0072562~blood microparticle	19	2.64993	2.36888e-06	C1QB, LGALS3BP, APCS, HSPA8, AMBP, C1S, SERPINF2, FN1, F13A1, APOA4, C4BPA, YWHAZ, C8G, C9, SERPING1, PFN1, HSPA1B, HSPA1A, C1QC	704	145	20562	3.82717	0.00156224	3.63595e-05	3.06852e-05		GO:0072562	2.36888e-06	blood microparticle
GOTERM_MF_DIRECT	GO:0042803~protein homodimerization activity	53	7.39191	2.39413e-06	TOP2A, PDCD6, NUDT5, ELAVL1, STK10, EFEMP2, SLK, IMPA1, RUVBL2, RACK1, LRRFIP1, B2M, MAP3K5, SH3GLB1, TPM4, PARP1, HMGCS1, TPM2, ACTN1, TPM1, SERPINF2, TAP1, APOA4, SARS1, ERP29, MYH9, CDH13, CSF1R, PON3, CAMK2D, KARS1, UBA5, STK4, CORO1A, FBLN5, SRM, S100A16, TPR, FLNA, BAK1, GBP2, CAMK2G, XDH, PDLIM4, S100A10, GSTM2, HARS1, GSTM1, AMBP, STAT1, STAT3, HIP1R, AIMP1	695	716	18869	2.00968	0.0020425	0.000102349	9.66032e-05		GO:0042803	2.39413e-06	protein homodimerization activity
GOTERM_CC_DIRECT	GO:0005581~collagen trimer	15	2.09205	2.80447e-06	C1QB, COL15A1, COL14A1, COL12A1, COL3A1, COL5A1, COL6A2, COL7A1, COL6A1, C1QTNF5, SERPINH1, COL6A6, EMILIN1, COL6A5, C1QC	704	92	20562	4.76207	0.00184924	4.2067e-05	3.5502e-05		GO:0005581	2.80447e-06	collagen trimer
GOTERM_BP_DIRECT	GO:0006886~intracellular protein transport	31	4.32357	2.8746e-06	ARF4, COPB2, COPA, SEC23A, TMED10, RAB3A, SAR1A, RAB3D, PDCD6, COPB1, IPO7, SCFD1, HERC2, TMED3, TMED2, BCAP29, SEC61B, AP3S1, RAB6A, SEC23B, TBC1D15, SEC31A, YWHAH, TMED9, COPZ2, ARFGAP3, ARCN1, SEC23IP, ERP29, COPG1, SEC24D	694	328	19308	2.62945	0.00906541	0.000700297	0.00068703		GO:0006886	2.8746e-06	intracellular protein transport
GOTERM_CC_DIRECT	GO:0005884~actin filament	15	2.09205	3.64247e-06	ANXA1, TPM4, TPM3, TPM2, ACTN1, TPM1, IQGAP1, CORO1A, CORO1B, DIAPH1, PAK1, RAC2, FLNA, LCP1, DBN1	704	94	20562	4.66075	0.00240115	5.34229e-05	4.50857e-05		GO:0005884	3.64247e-06	actin filament
GOTERM_MF_DIRECT	GO:0005509~calcium ion binding	54	7.53138	4.44865e-06	FKBP10, PRKCSH, PDCD6, PPP3CA, PPP3CB, EFEMP2, EFEMP1, CAPNS1, ANXA6, CAPN2, EFHD2, ANXA7, ANXA1, TPM4, ANXA2, ANXA3, ANXA4, ACTN1, ANXA5, MMP12, RCN3, RCN1, CANX, CDH11, CDH13, DSG2, FKBP9, LCP1, S100A9, MYL9, APCS, MACF1, LRP1, C1S, ITPR2, FBLN1, ITPR3, SRI, IQGAP1, FBLN5, HSP90B1, MYL12B, CLEC3B, S100A16, SLC25A24, S100A10, HSPA5, NIN, CALU, CALR, ESYT1, TPT1, NUCB2, FBN1	695	751	18869	1.95217	0.00379195	0.000181124	0.000170955		GO:0005509	4.44865e-06	calcium ion binding
GOTERM_BP_DIRECT	GO:0045047~protein targeting to ER	7	0.97629	4.90948e-06	SEC61A1, SPCS3, SPCS2, SPCS1, SEC61G, SRP54, SRPRA	694	14	19308	13.9107	0.0154329	0.00111059	0.00108955		GO:0045047	4.90948e-06	protein targeting to ER
GOTERM_CC_DIRECT	GO:0005681~spliceosomal complex	17	2.37099	5.15411e-06	HSPA8, DDX46, U2AF1, HNRNPR, PRPF19, RBM3, LSM8, LGALS3, HNRNPDL, U2AF2, TRA2B, NCL, TRA2A, HNRNPA2B1, SNRPG, HNRNPC, HNRNPA1	704	124	20562	4.00424	0.00339594	7.39503e-05	6.24096e-05		GO:0005681	5.15411e-06	spliceosomal complex
GOTERM_MF_DIRECT	GO:0031267~small GTPase binding	28	3.90516	7.24388e-06	DOCK4, ROCK2, IQGAP1, IQGAP2, YBX3, IPO7, IPO5, CORO1C, PAK1, IPO9, ARHGDIA, ARHGDIB, PDE6D, FLNA, TNPO1, PAK2, TNPO2, RAB8A, ANXA2, RCC2, CYRIB, CYRIA, LSM2, DIAPH1, TRIP11, PKN1, PFN1, KPNB1	695	285	18869	2.66733	0.0061672	0.000281524	0.000265719		GO:0031267	7.24388e-06	small GTPase binding
GOTERM_CC_DIRECT	GO:0030670~phagocytic vesicle membrane	13	1.81311	7.30583e-06	ANXA3, TAP2, CYBB, TAP1, IRGM, CORO1A, LAMP2, RAC2, CALR, SEC22B, B2M, RAB8A, RAB8B	704	74	20562	5.13103	0.00481026	0.000102593	8.65819e-05		GO:0030670	7.30583e-06	phagocytic vesicle membrane
GOTERM_BP_DIRECT	GO:0051603~proteolysis involved in cellular protein catabolic process	11	1.53417	7.69346e-06	DNAJC3, HSPA5, CTSL, CTSZ, CAPN2, CTSS, PSMB8, CTSC, PSMB10, PSMB9, LGMN	694	49	19308	6.2456	0.0240783	0.00142723	0.00140019		GO:0051603	7.69346e-06	proteolysis involved in cellular protein catabolic process
GOTERM_BP_DIRECT	GO:0075525~viral translational termination-reinitiation	5	0.69735	7.99358e-06	EIF3L, EIF3G, EIF3D, EIF3A, EIF3B	694	5	19308	27.8213	0.0250058	0.00142723	0.00140019		GO:0075525	7.99358e-06	viral translational termination-reinitiation
GOTERM_BP_DIRECT	GO:0002183~cytoplasmic translational initiation	5	0.69735	7.99358e-06	EIF4A2, EIF4A1, EIF3M, EIF2B3, EIF3I	694	5	19308	27.8213	0.0250058	0.00142723	0.00140019		GO:0002183	7.99358e-06	cytoplasmic translational initiation
GOTERM_BP_DIRECT	GO:0030199~collagen fibril organization	12	1.67364	8.11184e-06	FKBP10, COL3A1, COL5A1, ANXA2, LUM, COL14A1, COL5A3, SERPINF2, COL12A1, PXDN, SERPINH1, DPT	694	60	19308	5.56427	0.025371	0.00142723	0.00140019		GO:0030199	8.11184e-06	collagen fibril organization
GOTERM_BP_DIRECT	GO:0045727~positive regulation of translation	14	1.95258	8.77496e-06	NIBAN1, DDX3X, EIF4A3, EEF2, ELAVL1, RBM3, HNRNPD, PTK2B, EIF3E, VIM, EIF3C, EIF3D, GCN1, ABCF1	694	84	19308	4.63689	0.0274164	0.00146265	0.00143494		GO:0045727	8.77496e-06	positive regulation of translation
GOTERM_MF_DIRECT	GO:0004812~aminoacyl-tRNA ligase activity	7	0.97629	9.12378e-06	GARS1, HARS1, KARS1, MARS1, IARS1, YARS1, VARS1	695	15	18869	12.6698	0.00776147	0.000339167	0.000320126		GO:0004812	9.12378e-06	aminoacyl-tRNA ligase activity
GOTERM_CC_DIRECT	GO:0005840~ribosome	20	2.7894	1.00052e-05	RPS7, RPS5, RPL11, RPLP0, RRBP1, SRP68, RPL10A, RPL9, RPS17, RPS28, RPS15A, CANX, RPS3, RPS20, RPL22L1, RPS2, RPS21, RPS10, GCN1, ABCF1	704	176	20562	3.31902	0.0065817	0.000137571	0.000116102		GO:0005840	1.00052e-05	ribosome
GOTERM_CC_DIRECT	GO:0031012~extracellular matrix	25	3.48675	1.09455e-05	COL15A1, COL14A1, FBLN1, PRELP, FBLN5, EFEMP2, EFEMP1, POSTN, LUM, MMP2, FN1, BGN, DCN, MMP12, COL3A1, COL5A1, COL6A2, COL5A3, COL6A1, PXDN, OGN, COL8A1, COL6A6, HPSE, FBN1	704	260	20562	2.8084	0.00719802	0.000147429	0.000124421		GO:0031012	1.09455e-05	extracellular matrix
GOTERM_BP_DIRECT	GO:0006614~SRP-dependent cotranslational protein targeting to membrane	6	0.83682	1.27339e-05	SEC61A1, SRP72, SSR3, SRP54, SRPRA, SRP68	694	10	19308	16.6928	0.0395384	0.00201642	0.00197821		GO:0006614	1.27339e-05	SRP-dependent cotranslational protein targeting to membrane
GOTERM_MF_DIRECT	GO:0008135~translation factor activity, RNA binding	8	1.11576	1.2936e-05	EIF4A1, EIF2B3, EIF2S3, EEF1D, EIF4G3, GCN1, ABCF1, EIF4G1	695	23	18869	9.44335	0.0109867	0.000460847	0.000434974		GO:0008135	1.2936e-05	translation factor activity, RNA binding
GOTERM_MF_DIRECT	GO:0004859~phospholipase inhibitor activity	6	0.83682	1.43354e-05	ANXA1, ANXA2, ANXA3, ANXA4, ANXA5, ANGPTL3	695	10	18869	16.2898	0.0121679	0.00049027	0.000462746		GO:0004859	1.43354e-05	phospholipase inhibitor activity
GOTERM_BP_DIRECT	GO:0006605~protein targeting	10	1.3947	1.44559e-05	YWHAQ, YWHAB, CDC37, SEC61G, LAMP2, RPL11, SRPRA, RAB27A, YWHAZ, YWHAG	694	42	19308	6.62413	0.0447637	0.00217434	0.00213315		GO:0006605	1.44559e-05	protein targeting
GOTERM_BP_DIRECT	GO:0018279~protein N-linked glycosylation via asparagine	8	1.11576	1.51044e-05	RPN2, DAD1, RPN1, ALG5, STT3A, STT3B, UGGT1, DDOST	694	24	19308	9.27378	0.0467242	0.00217434	0.00213315		GO:0018279	1.51044e-05	protein N-linked glycosylation via asparagine
GOTERM_BP_DIRECT	GO:0006487~protein N-linked glycosylation	11	1.53417	1.60388e-05	KRTCAP2, B4GALT1, RPN2, DAD1, RPN1, ALG5, STT3A, MLEC, MOGS, STT3B, DDOST	694	53	19308	5.77424	0.0495419	0.00220847	0.00216663		GO:0006487	1.60388e-05	protein N-linked glycosylation
GOTERM_CC_DIRECT	GO:0005794~Golgi apparatus	67	9.34449	2.09723e-05	ARF4, DOCK4, B4GALT1, NCF1, TMEM167A, SART1, MYDGF, GOLGA3, CTSL, GOLGA1, CAPN2, TMED3, TMED2, AP3S1, FAM3C, PTGFRN, PTGDS, B2M, CTSC, RAB8A, TMED9, MAP2K1, CYBB, SERPINB9, FNDC3A, ARAP1, ARFGAP3, RAB33B, KEL, TMEM214, ANGPTL3, SEC22B, CD44, MACF1, TMED10, PDXDC1, LRP1, SAR1A, UBA5, COPB1, GLT8D1, TM9SF4, LMAN1, GANAB, DPP7, PRRC1, SPP1, DYM, CD14, GBP2, RAB6A, ARSB, LYN, YIPF3, DDHD2, RAB27A, RA…	704	1141	20562	1.71507	0.0137465	0.000276834	0.000233631		GO:0005794	2.09723e-05	Golgi apparatus
GOTERM_MF_DIRECT	GO:0031489~myosin V binding	7	0.97629	2.11804e-05	RAB3A, FUS, RAB3D, RAB27A, RAB27B, RAB6A, RAB8A	695	17	18869	11.1793	0.0179257	0.00069651	0.000657408		GO:0031489	2.11804e-05	myosin V binding
GOTERM_BP_DIRECT	GO:0007160~cell-matrix adhesion	15	2.09205	2.87401e-05	ITGAM, ITGB4, ITGB2, ITGA1, FN1, SORBS1, FBLN5, COL3A1, COL5A3, ANGPTL3, ITGAX, EMILIN1, HPSE, CD44, FERMT3	694	107	19308	3.90019	0.087028	0.0037925	0.00372065		GO:0007160	2.87401e-05	cell-matrix adhesion
GOTERM_MF_DIRECT	GO:0048306~calcium-dependent protein binding	14	1.95258	3.09818e-05	ANXA1, ANXA2, ANXA3, PDCD6, ANXA4, ALG2, S100A16, ANXA6, ANXA7, CPNE3, S100A9, S100A10, RBM22, SEC31A	695	92	18869	4.13147	0.0261119	0.00098109	0.000926011		GO:0048306	3.09818e-05	calcium-dependent protein binding
GOTERM_MF_DIRECT	GO:0031072~heat shock protein binding	12	1.67364	3.49322e-05	HSPA8, HDAC2, ITGAM, HSPA5, EEF1D, CDC37, TPR, ITGB2, BAG1, BAK1, HSPA1B, HSPA1A	695	68	18869	4.79111	0.029392	0.00106668	0.0010068		GO:0031072	3.49322e-05	heat shock protein binding
GOTERM_BP_DIRECT	GO:0048251~elastic fiber assembly	6	0.83682	3.76895e-05	MFAP4, COL3A1, EFEMP2, MYH11, EMILIN1, FBLN5	694	12	19308	13.9107	0.11255	0.00477451	0.00468405		GO:0048251	3.76895e-05	elastic fiber assembly
GOTERM_CC_DIRECT	GO:0034774~secretory granule lumen	15	2.09205	3.84536e-05	CFD, HSPA8, DDX3X, MVP, GMFG, ARPC5, EPX, EEF2, NFKB1, PSMA5, HK3, PRDX4, IMPDH1, IMPDH2, S100A9	704	115	20562	3.80966	0.0250605	0.000497635	0.000419974		GO:0034774	3.84536e-05	secretory granule lumen
GOTERM_CC_DIRECT	GO:0015935~small ribosomal subunit	8	1.11576	4.28601e-05	RPS28, RPS5, RPS3, RACK1, RPS20, RPSA, RPS2, RPS21	704	29	20562	8.05721	0.0278919	0.000543993	0.000459097		GO:0015935	4.28601e-05	small ribosomal subunit
GOTERM_BP_DIRECT	GO:0008360~regulation of cell shape	18	2.51046	4.31497e-05	CSF1R, ANXA1, WDR1, SH3KBP1, HEXB, TPM1, ITGB2, FN1, ARAP1, CORO1A, MYL12B, ZMPSTE24, DIAPH1, ARHGDIA, RAC2, PTK2B, MYH9, MYH10	694	155	19308	3.23086	0.127769	0.00525597	0.00515639		GO:0008360	4.31497e-05	regulation of cell shape
GOTERM_CC_DIRECT	GO:0005791~rough endoplasmic reticulum	11	1.53417	4.41257e-05	SEC61A1, NCF1, RPN2, CANX, RPN1, CYBB, TMEM97, PTGDS, RPS21, CKAP4, ARSB	704	62	20562	5.18196	0.0287036	0.00054949	0.000463736		GO:0005791	4.41257e-05	rough endoplasmic reticulum
GOTERM_MF_DIRECT	GO:0003756~protein disulfide isomerase activity	7	0.97629	6.03508e-05	ERO1A, PDIA3, TMX3, P4HB, PDIA6, PDIA4, TXNDC5	695	20	18869	9.50237	0.0502355	0.00177931	0.00167942		GO:0003756	6.03508e-05	protein disulfide isomerase activity
GOTERM_CC_DIRECT	GO:0042383~sarcolemma	14	1.95258	6.67729e-05	CAMK2D, ANXA1, LAMA2, ANXA2, KRT8, BGN, CORO1C, PPP3CA, KRT19, DES, COL6A2, COL6A1, FLNC, PLEC	704	106	20562	3.85758	0.0431146	0.000816114	0.000688751		GO:0042383	6.67729e-05	sarcolemma
GOTERM_CC_DIRECT	GO:0005940~septin ring	6	0.83682	7.1303e-05	SEPTIN2, SEPTIN4, SEPTIN9, SEPTIN11, SEPTIN7, SEPTIN8	704	14	20562	12.5175	0.0459715	0.000825614	0.000696768		GO:0005940	7.1303e-05	septin ring
GOTERM_CC_DIRECT	GO:0031105~septin complex	6	0.83682	7.1303e-05	SEPTIN2, SEPTIN4, SEPTIN9, SEPTIN11, SEPTIN7, SEPTIN8	704	14	20562	12.5175	0.0459715	0.000825614	0.000696768		GO:0031105	7.1303e-05	septin complex
GOTERM_CC_DIRECT	GO:0032153~cell division site	6	0.83682	7.1303e-05	SEPTIN2, SEPTIN4, SEPTIN9, SEPTIN11, SEPTIN7, SEPTIN8	704	14	20562	12.5175	0.0459715	0.000825614	0.000696768		GO:0032153	7.1303e-05	cell division site
GOTERM_BP_DIRECT	GO:0006606~protein import into nucleus	14	1.95258	8.04138e-05	STAT3, STK4, ELAVL1, IPO7, IPO5, MMP12, PPP3CA, IPO9, LMNA, TPR, NUP62, TNPO1, TNPO2, KPNB1	694	103	19308	3.78154	0.224898	0.00943224	0.00925354		GO:0006606	8.04138e-05	protein import into nucleus
GOTERM_BP_DIRECT	GO:0006446~regulation of translational initiation	8	1.11576	9.21929e-05	EIF4A2, EIF5B, EIF3K, EIF3H, EIF3E, EIF4G3, EIF3B, EIF4G1	694	31	19308	7.1797	0.253292	0.0100681	0.00987735		GO:0006446	9.21929e-05	regulation of translational initiation
GOTERM_BP_DIRECT	GO:0035987~endodermal cell differentiation	8	1.11576	9.21929e-05	MAP2K1, MMP2, COL7A1, COL12A1, ITGB2, COL6A1, FN1, COL8A1	694	31	19308	7.1797	0.253292	0.0100681	0.00987735		GO:0035987	9.21929e-05	endodermal cell differentiation
GOTERM_CC_DIRECT	GO:0031252~cell leading edge	10	1.3947	9.42836e-05	SHTN1, SLK, DDX3X, ARPC2, ITGB4, MYH9, VIM, PABPC1, CORO1A, CORO1B	704	55	20562	5.31043	0.0603333	0.00105894	0.00089368		GO:0031252	9.42836e-05	cell leading edge
GOTERM_CC_DIRECT	GO:0005604~basement membrane	13	1.81311	9.46627e-05	LAMA2, ANXA2, ITGB4, SERPINF1, TNC, FN1, FBLN1, EFEMP2, COL5A1, COL7A1, PXDN, VWA1, FBN1	704	95	20562	3.9968	0.0605685	0.00105894	0.00089368		GO:0005604	9.46627e-05	basement membrane
GOTERM_BP_DIRECT	GO:0030036~actin cytoskeleton organization	19	2.64993	0.000101471	VASP, CAP1, ROCK2, ACTN1, ARPC5, CORO1A, CORO1B, CORO1C, PDLIM1, DIAPH1, CAPZA1, CFL1, FSCN1, RAC2, FLNA, FLNB, FLNC, PFN1, PDLIM4	694	182	19308	2.90442	0.274921	0.0107119	0.010509		GO:0030036	0.000101471	actin cytoskeleton organization
GOTERM_CC_DIRECT	GO:0030127~COPII vesicle coat	6	0.83682	0.00010395	SEC23A, SAR1A, PDCD6, SEC24D, SEC23B, SEC31A	704	15	20562	11.683	0.06631	0.00114345	0.000965006		GO:0030127	0.00010395	COPII vesicle coat
GOTERM_MF_DIRECT	GO:0019904~protein domain specific binding	24	3.34728	0.000116124	HSPA5, NUMA1, CBX3, YWHAB, RCC2, ACTN1, RAB27A, RAB27B, SRP68, IQGAP1, YWHAZ, YWHAQ, TRA2B, NEDD4, LAMP2, MYH9, VIM, HNRNPA1, RAB6A, GUSB, YWHAG, KPNB1, YWHAH, MAP3K5	695	263	18869	2.47753	0.0944163	0.00330953	0.00312373		GO:0019904	0.000116124	protein domain specific binding
GOTERM_CC_DIRECT	GO:0012507~ER to Golgi transport vesicle membrane	10	1.3947	0.00012553	LMAN1, SEC23A, SEC23IP, TMED10, TMED2, SEC22B, SEC24D, SEC23B, B2M, SEC31A	704	57	20562	5.1241	0.0795153	0.00135819	0.00114623		GO:0012507	0.00012553	ER to Golgi transport vesicle membrane
GOTERM_MF_DIRECT	GO:0015035~protein disulfide oxidoreductase activity	7	0.97629	0.000143029	ERO1A, PDIA3, TMX3, P4HB, PDIA6, PDIA4, TXNDC5	695	23	18869	8.26293	0.114989	0.00394483	0.00372337		GO:0015035	0.000143029	protein disulfide oxidoreductase activity
GOTERM_CC_DIRECT	GO:0042824~MHC class I peptide loading complex	5	0.69735	0.000148798	PDIA3, TAP2, TAP1, CALR, B2M	704	9	20562	16.2263	0.0935451	0.00158398	0.00133678		GO:0042824	0.000148798	MHC class I peptide loading complex
GOTERM_MF_DIRECT	GO:0019903~protein phosphatase binding	13	1.81311	0.000151869	CSF1R, MVP, STAT3, ITGA1, IQGAP1, HSP90B1, LGALS3, RACK1, CSK, STAT6, PDLIM4, JAK1, MAP3K5	695	93	18869	3.79511	0.121646	0.00405774	0.00382994		GO:0019903	0.000151869	protein phosphatase binding
GOTERM_CC_DIRECT	GO:0005862~muscle thin filament tropomyosin	4	0.55788	0.000155133	TPM4, TPM3, TPM2, TPM1	704	4	20562	29.2074	0.0973276	0.0016252	0.00137157		GO:0005862	0.000155133	muscle thin filament tropomyosin
GOTERM_BP_DIRECT	GO:0043066~negative regulation of apoptotic process	37	5.16039	0.0001736	CSF1R, ARF4, HDAC2, DDX3X, YBX3, HSP90B1, MYDGF, UFL1, DDRGK1, ARHGDIA, NUP62, CFL1, BAG1, MYO18A, PTK2B, FLNA, NCKAP1L, PAK2, TXNDC5, ANXA1, HSPA5, ANXA4, ANXA5, HIP1R, ASNS, SERPINB9, PA2G4, YWHAZ, NFKB1, DNAJC3, KRT18, DAD1, PDCD4, CD44, TPT1, HSPA1B, HSPA1A	694	526	19308	1.95701	0.423057	0.0177352	0.0173992		GO:0043066	0.0001736	negative regulation of apoptotic process
GOTERM_BP_DIRECT	GO:2000767~positive regulation of cytoplasmic translation	6	0.83682	0.00018441	SYNCRIP, CNBP, HNRNPD, PABPC1, EEF2, YBX3	694	16	19308	10.433	0.442484	0.0182508	0.017905		GO:2000767	0.00018441	positive regulation of cytoplasmic translation
GOTERM_MF_DIRECT	GO:0031369~translation initiation factor binding	7	0.97629	0.00018481	EIF3M, TBL2, DDX3X, EIF3F, EIF3C, EIF3B, EIF4G1	695	24	18869	7.91865	0.146016	0.00478827	0.00451945		GO:0031369	0.00018481	translation initiation factor binding
GOTERM_MF_DIRECT	GO:0030021~extracellular matrix structural constituent conferring compression resistance	6	0.83682	0.000206672	LUM, OGN, PRG2, BGN, PRELP, DCN	695	16	18869	10.1811	0.161815	0.00519719	0.00490542		GO:0030021	0.000206672	extracellular matrix structural constituent conferring compression resistance
GOTERM_BP_DIRECT	GO:0006891~intra-Golgi vesicle-mediated transport	8	1.11576	0.000208114	COPB2, COPA, COPB1, COPZ2, COPG1, RAB6A, COPE, RAB33B	694	35	19308	6.35916	0.482826	0.0199727	0.0195943		GO:0006891	0.000208114	intra-Golgi vesicle-mediated transport
GOTERM_CC_DIRECT	GO:0035580~specific granule lumen	10	1.3947	0.000243186	CTSZ, RAB27A, GGH, PTPN6, HPSE, CTSD, B2M, ILF2, NFKB1, KPNB1	704	62	20562	4.71087	0.148301	0.00250785	0.00211648		GO:0035580	0.000243186	specific granule lumen
GOTERM_CC_DIRECT	GO:0030140~trans-Golgi network transport vesicle	6	0.83682	0.000272329	TMED9, TMED10, RAB13, RAB27B, RAB8A, RAB8B	704	18	20562	9.7358	0.16453	0.00276518	0.00233365		GO:0030140	0.000272329	trans-Golgi network transport vesicle
GOTERM_BP_DIRECT	GO:0017157~regulation of exocytosis	8	1.11576	0.000299397	RAB3A, SEPTIN2, RAB3D, RAB13, SEPTIN4, RAB8A, RAB8B, RAB33B	694	37	19308	6.01542	0.612729	0.0274485	0.0269285		GO:0017157	0.000299397	regulation of exocytosis
GOTERM_BP_DIRECT	GO:0030198~extracellular matrix organization	17	2.37099	0.000303347	ERO1A, POSTN, COL15A1, B4GALT1, COL14A1, MMP2, FBLN1, MMP12, COL3A1, PRDX4, COL5A1, COL5A3, PXDN, COL8A1, VWA1, COL6A6, COL6A5	694	165	19308	2.86644	0.617546	0.0274485	0.0269285		GO:0030198	0.000303347	extracellular matrix organization
GOTERM_BP_DIRECT	GO:0042060~wound healing	13	1.81311	0.000320807	FKBP10, MACF1, POSTN, TPM1, TNC, DCN, CORO1B, PPP3CA, COL3A1, PAK1, NACA, MAP3K5, PLEC	694	103	19308	3.51143	0.638134	0.0282221	0.0276875		GO:0042060	0.000320807	wound healing
GOTERM_CC_DIRECT	GO:0005654~nucleoplasm	173	24.1283	0.000322399	CMAS, RNH1, SMARCB1, PDCD6, EIF4A3, HNRNPR, RBPJ, IPO7, TIAL1, LGALS3, GOLGA3, RPS17, HERC2, TRIM28, RUVBL2, MAGOH, TRIM25, CPNE3, RPS10, RARS1, RBFOX2, RPS7, MAP1S, RPS5, UBE2E3, KRT8, RPSA, ILF2, GTF2F2, MTAP, KEL, DDX39A, NCL, PSME1, SNRPG, PSME2, CD2BP2, ADPRS, PPIB, S100A9, KPNB1, RAI14, FTO, CSF1R, SET, CBFB, ITPR2, WDR61, ITPR3, STK4, KLC2, HNRNPDL, EPB41L2, TPR, BAG1, CSTF1, FDPS, HSPA8, …	704	3963	20562	1.27501	0.191696	0.00322399	0.00272085		GO:0005654	0.000322399	nucleoplasm
GOTERM_MF_DIRECT	GO:0008092~cytoskeletal protein binding	10	1.3947	0.00032243	MACF1, DES, B4GALT1, ANXA2, EPB41L2, TPM1, CAPN2, SORBS1, FLNC, CORO1A	695	60	18869	4.52494	0.240731	0.0078765	0.00743431		GO:0008092	0.00032243	cytoskeletal protein binding
GOTERM_MF_DIRECT	GO:0047485~protein N-terminus binding	14	1.95258	0.000341028	EIF5A, MAP2K1, PARP1, GAD1, ALG2, GLRX, RBPJ, DCN, SCFD1, YWHAQ, EIF3E, RPS21, HSPA1B, HSPA1A	695	116	18869	3.27668	0.252699	0.00798649	0.00753812		GO:0047485	0.000341028	protein N-terminus binding
GOTERM_MF_DIRECT	GO:0060090~binding, bridging	17	2.37099	0.000345614	NCF1, SEPTIN2, CBX1, SEPTIN4, IQGAP1, SEPTIN9, SEPTIN11, SEPTIN7, SEPTIN8, PAK1, PRDX4, SRPRA, RACK1, EMILIN1, VIM, EIF3B, EIF4G1	695	163	18869	2.83156	0.255621	0.00798649	0.00753812		GO:0060090	0.000345614	binding, bridging
GOTERM_BP_DIRECT	GO:0006915~apoptotic process	40	5.5788	0.000347044	NCF1, SH3KBP1, ITGB2, STK4, YARS1, YBX3, TIAL1, MYDGF, PAK1, SLK, LGALS1, PUF60, CASP6, BCL7C, PEA15, BAG1, MYO18A, CASP1, RACK1, RPS3, PTK2B, BCAP29, BAK1, CD14, PAK2, CTSC, SH3GLB1, PARP1, MAP1S, HIP1R, SERPINB9, SEPTIN4, NFKB1, AIMP1, DAP, MARCKS, TMEM214, DAD1, PDCD4, S100A9	694	607	19308	1.83337	0.667005	0.0289242	0.0283763		GO:0006915	0.000347044	apoptotic process
GOTERM_BP_DIRECT	GO:0051592~response to calcium ion	10	1.3947	0.000347054	PPP3CA, S100A16, PDCD6, NEDD4, HNRNPD, ALG2, ANXA7, PTK2B, ITPR3, SEC31A	694	62	19308	4.48731	0.667015	0.0289242	0.0283763		GO:0051592	0.000347054	response to calcium ion
GOTERM_CC_DIRECT	GO:0042589~zymogen granule membrane	5	0.69735	0.000368926	TMED10, GP2, TMED2, RAB27B, ZG16	704	11	20562	13.2761	0.216149	0.0036342	0.00306704		GO:0042589	0.000368926	zymogen granule membrane
GOTERM_CC_DIRECT	GO:0071953~elastic fiber	4	0.55788	0.000377945	MFAP4, EFEMP2, FBLN1, FBLN5	704	5	20562	23.3659	0.220803	0.00365141	0.00308157		GO:0071953	0.000377945	elastic fiber
GOTERM_CC_DIRECT	GO:0005874~microtubule	25	3.48675	0.000381739	MACF1, CNP, DNAH5, IQGAP1, IQGAP2, TUBA1C, TUBB6, MAP1LC3B, KLC2, MAP1LC3A, TUBB3, DPYSL2, STMN1, CASP1, DNAH12, MAP1S, RCC2, TUBB4B, SEPTIN9, KIF27, SHTN1, TUBB2B, TUBB2A, MAP1B, EIF3A	704	326	20562	2.23983	0.222752	0.00365141	0.00308157		GO:0005874	0.000381739	microtubule
GOTERM_CC_DIRECT	GO:0031093~platelet alpha granule lumen	10	1.3947	0.000440475	CFD, ACTN1, SERPINF2, OLA1, PCYOX1L, FN1, F13A1, SERPING1, CYRIB, FERMT3	704	67	20562	4.35931	0.252318	0.00415305	0.00350492		GO:0031093	0.000440475	platelet alpha granule lumen
GOTERM_BP_DIRECT	GO:0075522~IRES-dependent viral translational initiation	5	0.69735	0.000443729	PTBP1, EIF3F, EIF3D, EIF3A, EIF3B	694	11	19308	12.6461	0.75489	0.0355736	0.0348996		GO:0075522	0.000443729	IRES-dependent viral translational initiation
GOTERM_BP_DIRECT	GO:0007015~actin filament organization	15	2.09205	0.000449303	TPM4, TPM3, SH3KBP1, TPM2, ACTN1, TPM1, HIP1R, CORO1A, CORO1B, CORO1C, MARCKS, FSCN1, RAC2, DBN1, MYO1F	694	138	19308	3.02406	0.759182	0.0355736	0.0348996		GO:0007015	0.000449303	actin filament organization
GOTERM_MF_DIRECT	GO:0004579~dolichyl-diphosphooligosaccharide-protein glycotransferase activity	4	0.55788	0.000468651	RPN2, RPN1, STT3A, STT3B	695	5	18869	21.7197	0.329896	0.0105447	0.00995267		GO:0004579	0.000468651	dolichyl-diphosphooligosaccharide-protein glycotransferase activity
GOTERM_BP_DIRECT	GO:0007155~cell adhesion	37	5.16039	0.000483338	LGALS3BP, RIPOR2, COL15A1, ITGAM, B4GALT1, LAMA2, ITGB4, COL12A1, ITGB2, TNC, DPT, TM9SF4, GPNMB, ITGAX, SPP1, NCAM1, IGFBP7, EMILIN1, MYH10, POSTN, AMBP, MCAM, ITGA1, FN1, RPSA, MFAP4, COL5A1, COL6A2, COL7A1, COL6A1, PXDN, CDH11, COL8A1, COL6A6, DSG2, COL6A5, CD44	694	555	19308	1.85476	0.783807	0.0373349	0.0366276		GO:0007155	0.000483338	cell adhesion
GOTERM_BP_DIRECT	GO:0009612~response to mechanical stimulus	10	1.3947	0.000497082	COL3A1, POSTN, STAT1, MAP1B, MMP2, CAPN2, TNC, ASNS, PTK2B, DCN	694	65	19308	4.2802	0.793023	0.0374824	0.0367723		GO:0009612	0.000497082	response to mechanical stimulus
GOTERM_BP_DIRECT	GO:0098609~cell-cell adhesion	18	2.51046	0.000511887	ITGAM, ANXA1, ANXA2, COL14A1, ITGB2, ITGA1, FNDC3A, PDLIM1, VMP1, KRT18, LGALS1, TRIM29, CDH11, ITGAX, MYH9, DSG2, CD44, TJP3	694	190	19308	2.6357	0.802511	0.0377011	0.0369868		GO:0098609	0.000511887	cell-cell adhesion
GOTERM_CC_DIRECT	GO:0016281~eukaryotic translation initiation factor 4F complex	5	0.69735	0.000538457	EIF4A2, EIF4A1, EIF4G3, EIF4E, EIF4G1	704	12	20562	12.1697	0.299161	0.00500537	0.00422423		GO:0016281	0.000538457	eukaryotic translation initiation factor 4F complex
GOTERM_BP_DIRECT	GO:0001649~osteoblast differentiation	14	1.95258	0.000560251	CBFB, TPM4, TNC, RRBP1, SND1, MRC2, UFL1, SYNCRIP, GPNMB, COL6A1, SPP1, BCAP29, HNRNPC, IARS1	694	125	19308	3.11599	0.83058	0.0403253	0.0395613		GO:0001649	0.000560251	osteoblast differentiation
GOTERM_BP_DIRECT	GO:2000114~regulation of establishment of cell polarity	6	0.83682	0.000580951	SHTN1, RIPOR2, ROCK2, RACK1, PTK2B, CYRIB	694	20	19308	8.3464	0.841339	0.040886	0.0401114		GO:2000114	0.000580951	regulation of establishment of cell polarity
GOTERM_CC_DIRECT	GO:0030426~growth cone	15	2.09205	0.000605746	COPA, CTSZ, HNRNPR, ARPC5, IQGAP1, ENO2, SHTN1, TUBB3, MAP1B, DPYSL2, CFL1, DPYSL3, FSCN1, PTK2B, DBN1	704	149	20562	2.94034	0.329622	0.00555267	0.00468612		GO:0030426	0.000605746	growth cone
GOTERM_MF_DIRECT	GO:0003735~structural constituent of ribosome	18	2.51046	0.000632684	RPS7, RPS5, RPL12, RPL11, RPLP0, RPSA, RPL10A, RPL9, RPS17, RPS28, RPS15A, RPS3, RPLP2, RPS20, RPL22L1, RPS2, RPS21, RPS10	695	189	18869	2.58568	0.417533	0.0138704	0.0130917		GO:0003735	0.000632684	structural constituent of ribosome
GOTERM_CC_DIRECT	GO:0009986~cell surface	39	5.43933	0.000712781	USP14, CSF1R, ITGAM, ITGB4, ITGB2, CTSZ, CD1D, IQGAP2, ENO2, LGALS3, LGALS1, MYO18A, ITGAX, NCAM1, PTGFRN, HAVCR1, ARSB, PDIA3, ANXA1, AMBP, HSPA5, ANXA2, ANXA4, ITGA1, SERPINF2, BGN, GP2, APOA4, PDIA4, AIMP1, PTPRC, TMX3, PXDN, ANGPTL3, ERP29, DSG2, CSPG4, CALR, CD44	704	639	20562	1.78261	0.375375	0.00644432	0.00543862		GO:0009986	0.000712781	cell surface
GOTERM_CC_DIRECT	GO:0005787~signal peptidase complex	4	0.55788	0.000736653	SPCS3, SPCS2, SPCS1, SEC11A	704	6	20562	19.4716	0.385146	0.00657015	0.00554481		GO:0005787	0.000736653	signal peptidase complex
GOTERM_BP_DIRECT	GO:0006414~translational elongation	6	0.83682	0.000740146	EIF5A, EEF1G, EEF1B2, EEF1D, GFM2, EEF2	694	21	19308	7.94895	0.904215	0.0509574	0.049992		GO:0006414	0.000740146	translational elongation
GOTERM_MF_DIRECT	GO:0005544~calcium-dependent phospholipid binding	9	1.25523	0.000749421	ANXA1, ANXA2, ANXA3, ANXA4, ANXA5, ANXA6, ANXA7, CPNE3, ESYT1	695	54	18869	4.52494	0.472837	0.0160189	0.0151196		GO:0005544	0.000749421	calcium-dependent phospholipid binding
GOTERM_CC_DIRECT	GO:0043231~intracellular membrane-bounded organelle	54	7.53138	0.000753104	ERO1A, SMARCB1, RAB3A, PRKCSH, RAB3D, HEXA, CTSZ, GIMAP4, HK2, CTSS, MAP1LC3B, MAP1LC3A, CTSL, LAMP2, RAC2, TMED2, AP3S1, GUSB, CTSE, CTSC, RAB8A, RAB8B, GAA, MYOF, FNDC3A, ARAP1, DDOST, RCN3, SLC7A5, DSG2, PPIB, ERGIC1, FTO, CSF1R, PON3, PDXDC1, UBA5, COPB1, GANAB, DPP7, TRA2A, SEC31A, LYN, AMBP, HSPA5, YIPF3, HIP1R, BYSL, RPIA, SEC23IP, RAB13, MAN2B1, HPSE, SEC24D	704	984	20562	1.60284	0.39179	0.00662731	0.00559305		GO:0043231	0.000753104	intracellular membrane-bounded organelle
GOTERM_CC_DIRECT	GO:0042788~polysomal ribosome	7	0.97629	0.000786468	RPS28, RPL11, EIF3H, RPL10A, EEF2, RPS21, ABCF1	704	33	20562	6.19551	0.405047	0.00682986	0.00576398		GO:0042788	0.000786468	polysomal ribosome
GOTERM_BP_DIRECT	GO:0048205~COPI coating of Golgi vesicle	4	0.55788	0.000848917	TMED9, TMED10, TMED2, ARFGAP3	694	6	19308	18.5476	0.932154	0.0572025	0.0561188		GO:0048205	0.000848917	COPI coating of Golgi vesicle
GOTERM_BP_DIRECT	GO:0061640~cytoskeleton-dependent cytokinesis	6	0.83682	0.000929784	SEPTIN2, SEPTIN4, SEPTIN9, SEPTIN11, SEPTIN7, SEPTIN8	694	22	19308	7.58763	0.947499	0.0613464	0.0601841		GO:0061640	0.000929784	cytoskeleton-dependent cytokinesis
GOTERM_BP_DIRECT	GO:0042493~response to drug	23	3.20781	0.000953492	LYN, HDAC2, ANXA1, RPN2, HMGCS1, STAT1, GAD1, STAT3, CYBB, GGH, SRP68, EEF2, LGALS1, DAD1, MAP1B, DPYSL2, PTK2B, NCKAP1L, BAK1, CALR, B2M, PMS1, S100A10	694	293	19308	2.18393	0.951301	0.0616267	0.0604592		GO:0042493	0.000953492	response to drug
GOTERM_CC_DIRECT	GO:0016529~sarcoplasmic reticulum	8	1.11576	0.00101325	FKBP1A, GSTM2, ITPR2, ITPR3, CALR, SRI, XDH, HK2	704	47	20562	4.97147	0.487821	0.00868497	0.00732959		GO:0016529	0.00101325	sarcoplasmic reticulum
GOTERM_CC_DIRECT	GO:0005635~nuclear envelope	17	2.37099	0.00112456	LRRC59, PARP1, CBX3, MYOF, CYBB, IPO7, LMNB1, IPO9, LMNA, TPR, NUP62, RAC2, CALR, NUP58, KPNB1, NUCB2, ABCF1	704	195	20562	2.54628	0.524138	0.00928714	0.00783779		GO:0005635	0.00112456	nuclear envelope
GOTERM_CC_DIRECT	GO:0045121~membrane raft	20	2.7894	0.00112467	LYN, ANXA2, ITGA1, GP2, SORBS1, IQGAP1, ENO2, EEF2, PTPRC, LAMP2, SERPINH1, EFHD2, CAPN2, PTK2B, CSK, STAT6, CD14, HPSE, CTSD, S100A10	704	252	20562	2.31805	0.524172	0.00928714	0.00783779		GO:0045121	0.00112467	membrane raft
GOTERM_CC_DIRECT	GO:0098978~glutamatergic synapse	26	3.62622	0.00113105	ARF4, GUCY1B1, CTBP2, EIF4A3, ELAVL1, CORO1A, SEPTIN11, PPP3CA, PPP3CB, PTK2B, FLNA, PAK2, EIF4E, RAB8A, LYN, HSPA8, GUCY1A1, ACTN1, STAT3, YWHAZ, ARPC2, CDH11, CANX, CAMK1, PFN1, DBN1	704	373	20562	2.0359	0.526173	0.00928714	0.00783779		GO:0098978	0.00113105	glutamatergic synapse
GOTERM_CC_DIRECT	GO:0016460~myosin II complex	6	0.83682	0.00113979	MYO18A, MYH9, MYH11, MYH10, MYL9, MYL12B	704	24	20562	7.30185	0.528901	0.00928714	0.00783779		GO:0016460	0.00113979	myosin II complex
GOTERM_CC_DIRECT	GO:0045171~intercellular bridge	11	1.53417	0.00118249	TUBB2B, GSTM2, PARP3, TUBB6, TUBB2A, GSTM1, TUBB3, SEPTIN2, DNAJC8, TUBB4B, GSTM5	704	92	20562	3.49219	0.54201	0.00951762	0.0080323		GO:0045171	0.00118249	intercellular bridge
GOTERM_BP_DIRECT	GO:0090110~cargo loading into COPII-coated vesicle	5	0.69735	0.001235	SEC23A, SAR1A, SEC24D, SEC23B, SEC31A	694	14	19308	9.93619	0.980057	0.0782246	0.0767426		GO:0090110	0.001235	cargo loading into COPII-coated vesicle
GOTERM_MF_DIRECT	GO:0043394~proteoglycan binding	5	0.69735	0.0013521	COL5A1, CTSL, COL5A3, FN1, CTSS	695	14	18869	9.6963	0.685091	0.0281961	0.0266132		GO:0043394	0.0013521	proteoglycan binding
GOTERM_BP_DIRECT	GO:2000249~regulation of actin cytoskeleton reorganization	6	0.83682	0.00141421	CSF1R, ARHGDIA, GMFG, ARHGDIB, PTK2B, IQGAP2	694	24	19308	6.95533	0.988705	0.0864051	0.0847681		GO:2000249	0.00141421	regulation of actin cytoskeleton reorganization
GOTERM_MF_DIRECT	GO:0004867~serine-type endopeptidase inhibitor activity	12	1.67364	0.00142415	ITIH5, AMBP, SERPIND1, ANXA2, SERPINF1, COL7A1, SERPINF2, SERPINH1, SERPING1, SERPINB9, SERPINB8, SERPINA4	695	103	18869	3.16306	0.703911	0.0289917	0.0273641		GO:0004867	0.00142415	serine-type endopeptidase inhibitor activity
GOTERM_BP_DIRECT	GO:0006415~translational termination	4	0.55788	0.001446	ETF1, ABCE1, GSPT2, GSPT1	694	7	19308	15.8979	0.989788	0.0864051	0.0847681		GO:0006415	0.001446	translational termination
GOTERM_BP_DIRECT	GO:1990776~response to angiotensin	4	0.55788	0.001446	COL3A1, ROCK2, CYBB, IQGAP1	694	7	19308	15.8979	0.989788	0.0864051	0.0847681		GO:1990776	0.001446	response to angiotensin
GOTERM_MF_DIRECT	GO:0030246~carbohydrate binding	18	2.51046	0.00147541	APCS, AMBP, GAA, CLEC10A, PRG2, MRC2, RPIA, LGALS3, CLEC3B, GANAB, LGALS1, CANX, MLEC, MAN2B1, CALR, ZG16, GUSB, NOMO1	695	204	18869	2.39556	0.716609	0.0293366	0.0276896		GO:0030246	0.00147541	carbohydrate binding
GOTERM_MF_DIRECT	GO:0044877~macromolecular complex binding	29	4.04463	0.00152013	TMED10, GUCY1B1, PCNA, LRP1, CTBP2, NUMA1, YWHAB, ARPC1B, ITGB2, FBLN1, IQGAP1, ENO2, PPP3CA, SCFD1, C8G, TTR, NUP62, RPS3, CAPN2, PTK2B, NCKAP1L, BAK1, GAD1, KRT8, TSN, KRT19, MAP1B, NUP58, FBN1	695	414	18869	1.90179	0.727243	0.0295388	0.0278805		GO:0044877	0.00152013	macromolecular complex binding
GOTERM_CC_DIRECT	GO:0016363~nuclear matrix	13	1.81311	0.00158351	SMARCB1, ANXA2, NUMA1, ACTL6A, KRT8, SORBS1, LMNB1, RUVBL2, LMNA, HNRNPA2B1, CFL1, VIM, S100A10	704	129	20562	2.94338	0.64864	0.0124418	0.0105002		GO:0016363	0.00158351	nuclear matrix
GOTERM_CC_DIRECT	GO:0030176~integral component of endoplasmic reticulum membrane	13	1.81311	0.00158351	TRAM1, HSPA5, ATP13A1, TECR, TAP2, TAP1, RRBP1, ZMPSTE24, SEC61A1, SPCS1, TBL2, ESYT1, ERGIC1	704	129	20562	2.94338	0.64864	0.0124418	0.0105002		GO:0030176	0.00158351	integral component of endoplasmic reticulum membrane
GOTERM_BP_DIRECT	GO:0051017~actin filament bundle assembly	7	0.97629	0.00162412	MARCKS, CALD1, ACTN1, DPYSL3, FSCN1, LCP1, CORO1B	694	36	19308	5.4097	0.994197	0.0952519	0.0934473		GO:0051017	0.00162412	actin filament bundle assembly
GOTERM_MF_DIRECT	GO:0000049~tRNA binding	10	1.3947	0.00168119	AIMP1, AARS1, SARS1, EIF2S3, RARS1, KARS1, MARS1, IARS1, YARS1, TARS1	695	75	18869	3.61995	0.762348	0.0319427	0.0301494		GO:0000049	0.00168119	tRNA binding
GOTERM_BP_DIRECT	GO:0042026~protein refolding	6	0.83682	0.00171613	FKBP1A, HSPA8, HSPA5, B2M, HSPA1B, HSPA1A	694	25	19308	6.67712	0.995667	0.0988182	0.096946		GO:0042026	0.00171613	protein refolding
GOTERM_BP_DIRECT	GO:0000184~nuclear-transcribed mRNA catabolic process, nonsense-mediated decay	7	0.97629	0.00188052	MAGOH, EIF4A3, ETF1, EIF3E, PABPC1, GSPT2, GSPT1	694	37	19308	5.26349	0.997428	0.104484	0.102505		GO:0000184	0.00188052	nuclear-transcribed mRNA catabolic process, nonsense-mediated decay
GOTERM_BP_DIRECT	GO:0030833~regulation of actin filament polymerization	7	0.97629	0.00188052	ARPC1B, ARPC5, PFN1, CYRIB, CYRIA, CORO1A, DBN1	694	37	19308	5.26349	0.997428	0.104484	0.102505		GO:0030833	0.00188052	regulation of actin filament polymerization
GOTERM_BP_DIRECT	GO:0001525~angiogenesis	20	2.7894	0.00196071	COL15A1, ANXA2, PDCD6, MCAM, MMP2, ERAP1, FN1, RBPJ, YWHAZ, AIMP1, MYDGF, CALD1, NCL, PXDN, ANGPTL3, PTK2B, FLNA, COL8A1, MYH9, CSPG4	694	252	19308	2.20804	0.998006	0.105628	0.103627		GO:0001525	0.00196071	angiogenesis
GOTERM_BP_DIRECT	GO:0034613~cellular protein localization	9	1.25523	0.00198684	SEPTIN2, LMNA, SEPTIN4, SEPTIN9, PRPF19, SEPTIN11, SEPTIN7, SEPTIN8, PLEC	694	64	19308	3.91237	0.998165	0.105628	0.103627		GO:0034613	0.00198684	cellular protein localization
GOTERM_MF_DIRECT	GO:0044325~ion channel binding	14	1.95258	0.00199569	LYN, CAMK2D, PRKCSH, ACTN1, ITPR2, SRI, YWHAZ, FKBP1A, DIAPH1, YWHAQ, FLNA, BAK1, S100A10, YWHAH	695	140	18869	2.71496	0.818414	0.0370938	0.0350114		GO:0044325	0.00199569	ion channel binding
GOTERM_BP_DIRECT	GO:0007229~integrin-mediated signaling pathway	12	1.67364	0.00200116	COL3A1, ITGAM, ITGB4, RCC2, ITGA1, ITGB2, ANGPTL3, ITGAX, FN1, MYH9, PTK2B, FERMT3	694	110	19308	3.03505	0.998246	0.105628	0.103627		GO:0007229	0.00200116	integrin-mediated signaling pathway
GOTERM_CC_DIRECT	GO:0005882~intermediate filament	13	1.81311	0.00205318	MACF1, KRT8, KRT7, KRT12, KRT75, LMNB1, KRT19, KRT18, DES, LMNA, VIM, PLEC, PRPH	704	133	20562	2.85486	0.742436	0.0159423	0.0134543		GO:0005882	0.00205318	intermediate filament
GOTERM_BP_DIRECT	GO:0048026~positive regulation of mRNA splicing, via spliceosome	6	0.83682	0.00206275	RBM3, HSPA8, TRA2B, NCL, TRA2A, PRPF19	694	26	19308	6.42031	0.998558	0.107094	0.105065		GO:0048026	0.00206275	positive regulation of mRNA splicing, via spliceosome
GOTERM_BP_DIRECT	GO:0006616~SRP-dependent cotranslational protein targeting to membrane, translocation	4	0.55788	0.00225202	SEC61A1, TRAM1, SRP54, SEC61B	694	8	19308	13.9107	0.999209	0.109726	0.107647		GO:0006616	0.00225202	SRP-dependent cotranslational protein targeting to membrane, translocation
GOTERM_BP_DIRECT	GO:0014012~peripheral nervous system axon regeneration	4	0.55788	0.00225202	MAP1B, MMP2, TNC, APOA4	694	8	19308	13.9107	0.999209	0.109726	0.107647		GO:0014012	0.00225202	peripheral nervous system axon regeneration
GOTERM_BP_DIRECT	GO:0031204~posttranslational protein targeting to membrane, translocation	4	0.55788	0.00225202	SEC61A1, HSPA5, SEC61G, SEC61B	694	8	19308	13.9107	0.999209	0.109726	0.107647		GO:0031204	0.00225202	posttranslational protein targeting to membrane, translocation
GOTERM_BP_DIRECT	GO:0022417~protein maturation by protein folding	4	0.55788	0.00225202	ERO1A, FKBP1A, PRDX4, CALR	694	8	19308	13.9107	0.999209	0.109726	0.107647		GO:0022417	0.00225202	protein maturation by protein folding
GOTERM_CC_DIRECT	GO:0005634~nucleus	240	33.4728	0.00228122	TES, CMAS, SMARCB1, EIF4A3, HNRNPR, IFI35, NUDT5, RBPJ, RPL9, NUDT3, NUDT4, TIAL1, LGALS3, HERC2, LGALS1, TRIM28, FTH1, MAGOH, CPNE3, RBFOX2, MAP1S, ACTN1, KRT8, ALG2, KRT7, SND1, MTAP, DDX39A, CD2BP2, ADPRS, TTLL12, PFN1, SET, CTBP2, IQGAP1, PRDX4, S100A16, LYN, MCAM, RCC2, PA2G4, PARP12, MANF, AIMP1, HNRNPF, FUBP1, HNRNPD, HNRNPC, CALR, TOP2A, FEN1, ARPC1B, RPLP0, TECR, SETD7, SRP54, PRPF19, SY…	704	5984	20562	1.17142	0.778498	0.017507	0.0147749		GO:0005634	0.00228122	nucleus
GOTERM_BP_DIRECT	GO:0010951~negative regulation of endopeptidase activity	14	1.95258	0.00234432	ITIH5, USP14, AMBP, SERPIND1, ANXA2, SERPINF1, SERPINF2, SERPINB9, SERPINB8, UCHL5, SERPINA4, COL7A1, SERPINH1, SERPING1	694	146	19308	2.6678	0.99941	0.110813	0.108713		GO:0010951	0.00234432	negative regulation of endopeptidase activity
GOTERM_BP_DIRECT	GO:0008104~protein localization	14	1.95258	0.00234432	YWHAB, SEPTIN2, SEPTIN4, PRPF19, SEPTIN9, YWHAZ, SEPTIN11, SEPTIN7, SEPTIN8, NIN, YWHAQ, YWHAG, YWHAH, PLEC	694	146	19308	2.6678	0.99941	0.110813	0.108713		GO:0008104	0.00234432	protein localization
GOTERM_MF_DIRECT	GO:0051087~chaperone binding	12	1.67364	0.00241746	DNAJC3, HSPA8, HSPA5, CDC37, BAG1, ERP29, FN1, HYOU1, BAK1, CALR, SUGT1, CTSC	695	110	18869	2.96178	0.873436	0.0439772	0.0415083		GO:0051087	0.00241746	chaperone binding
GOTERM_BP_DIRECT	GO:0016540~protein autoprocessing	6	0.83682	0.00245776	PARP1, CASP6, CTSL, CASP1, CAPN2, CTSE	694	27	19308	6.18252	0.999589	0.114467	0.112298		GO:0016540	0.00245776	protein autoprocessing
GOTERM_BP_DIRECT	GO:0015031~protein transport	29	4.04463	0.0025115	NBAS, SEC23A, GOLT1B, MVP, RRBP1, HSP90B1, SCAMP4, LMAN1, SEC61A1, SCFD1, NUP62, ARL6IP5, TMED3, TMED2, SEC23B, EIF5A, ATP13A1, TAP2, COPZ2, TAP1, ARCN1, RAB33B, RCN3, NACA, MYH9, ZG16, SEC22B, NUP58, COPE	694	439	19308	1.83786	0.999653	0.115274	0.11309		GO:0015031	0.0025115	protein transport
GOTERM_BP_DIRECT	GO:0030335~positive regulation of cell migration	20	2.7894	0.00254925	LYN, CSF1R, HSPA5, ROCK2, MCAM, MMP2, STAT3, CORO1A, DIAPH1, PPP3CA, PAK1, GPNMB, DDRGK1, ANGPTL3, ITGAX, RACK1, PTK2B, CDH13, CPNE3, FERMT3	694	258	19308	2.15669	0.999692	0.115335	0.11315		GO:0030335	0.00254925	positive regulation of cell migration
GOTERM_CC_DIRECT	GO:1904724~tertiary granule lumen	8	1.11576	0.00258397	ASAH1, FTH1, GGH, PTPN6, CTSD, B2M, ILF2, CTSS	704	55	20562	4.24835	0.818705	0.0196026	0.0165434		GO:1904724	0.00258397	tertiary granule lumen
GOTERM_BP_DIRECT	GO:0033627~cell adhesion mediated by integrin	7	0.97629	0.00283506	ITGAM, ITGB4, ITGA1, ITGB2, ITGAX, EMILIN1, FBN1	694	40	19308	4.86873	0.999876	0.12646	0.124064		GO:0033627	0.00283506	cell adhesion mediated by integrin
GOTERM_CC_DIRECT	GO:0000502~proteasome complex	8	1.11576	0.00317481	PSMA5, USP14, TXNL1, PSME1, PSME2, PSMB8, PSMB10, PSMB9	704	57	20562	4.09928	0.877385	0.023811	0.0200951		GO:0000502	0.00317481	proteasome complex
GOTERM_CC_DIRECT	GO:0018444~translation release factor complex	3	0.41841	0.0034223	ETF1, GSPT2, GSPT1	704	3	20562	29.2074	0.89592	0.0253789	0.0214182		GO:0018444	0.0034223	translation release factor complex
GOTERM_CC_DIRECT	GO:0035577~azurophil granule membrane	8	1.11576	0.00350633	PIGR, B4GALT1, GAA, RAB3D, LAMP2, CPNE3, DDOST, CKAP4	704	58	20562	4.02861	0.901554	0.0257131	0.0217003		GO:0035577	0.00350633	azurophil granule membrane
GOTERM_BP_DIRECT	GO:0006909~phagocytosis	9	1.25523	0.00351345	ANXA1, LRP1, ANXA3, ITGB2, PLD4, CD14, CORO1A, TM9SF4, CORO1C	694	70	19308	3.57703	0.999986	0.154543	0.151615		GO:0006909	0.00351345	phagocytosis
GOTERM_MF_DIRECT	GO:0016810~hydrolase activity, acting on carbon-nitrogen (but not peptide) bonds	4	0.55788	0.0035242	ASAH1, DPYSL2, DPYSL3, NAAA	695	9	18869	12.0665	0.950953	0.0627747	0.0592505		GO:0016810	0.0035242	hydrolase activity, acting on carbon-nitrogen (but not peptide) bonds
GOTERM_CC_DIRECT	GO:0010494~cytoplasmic stress granule	10	1.3947	0.00363733	TIAL1, DDX3X, TRIM25, PABPC1, EIF4E, ELAVL1, EIF2S1, KPNB1, EIF3B, EIF4G1	704	90	20562	3.24527	0.909736	0.0263807	0.0222637		GO:0010494	0.00363733	cytoplasmic stress granule
GOTERM_BP_DIRECT	GO:0045471~response to ethanol	13	1.81311	0.0036568	ACTR2, STAT3, SETD7, TNC, GGH, RPL10A, EEF2, EEF1B2, TBXAS1, PTK2B, CD14, BAK1, EIF4G1	694	136	19308	2.65939	0.999991	0.156984	0.15401		GO:0045471	0.0036568	response to ethanol
GOTERM_MF_DIRECT	GO:0098641~cadherin binding involved in cell-cell adhesion	5	0.69735	0.00367673	PDLIM1, KRT18, ANXA1, ANXA2, TRIM29	695	18	18869	7.54157	0.956964	0.0641552	0.0605535		GO:0098641	0.00367673	cadherin binding involved in cell-cell adhesion
GOTERM_BP_DIRECT	GO:1904237~positive regulation of substrate-dependent cell migration, cell attachment to substrate	3	0.41841	0.00376721	FN1, FBLN1, STK4	694	3	19308	27.8213	0.999994	0.156984	0.15401		GO:1904237	0.00376721	positive regulation of substrate-dependent cell migration, cell attachment to substrate
GOTERM_BP_DIRECT	GO:0002184~cytoplasmic translational termination	3	0.41841	0.00376721	ETF1, GSPT2, GSPT1	694	3	19308	27.8213	0.999994	0.156984	0.15401		GO:0002184	0.00376721	cytoplasmic translational termination
GOTERM_BP_DIRECT	GO:0030327~prenylated protein catabolic process	3	0.41841	0.00376721	PCYOX1L, PCYOX1, ZMPSTE24	694	3	19308	27.8213	0.999994	0.156984	0.15401		GO:0030327	0.00376721	prenylated protein catabolic process
GOTERM_MF_DIRECT	GO:0051787~misfolded protein binding	6	0.83682	0.00378317	DNAJC3, HSPA8, HSPA5, DNAJB11, HSPA1B, HSPA1A	695	29	18869	5.61717	0.960716	0.0646921	0.0610603		GO:0051787	0.00378317	misfolded protein binding
GOTERM_BP_DIRECT	GO:0019886~antigen processing and presentation of exogenous peptide antigen via MHC class II	6	0.83682	0.00397075	CTSL, CTSE, CTSD, B2M, CTSS, LGMN	694	30	19308	5.56427	0.999997	0.163317	0.160222		GO:0019886	0.00397075	antigen processing and presentation of exogenous peptide antigen via MHC class II
GOTERM_CC_DIRECT	GO:0033018~sarcoplasmic reticulum lumen	4	0.55788	0.0039887	CALU, CALR, HSP90B1, MANF	704	10	20562	11.683	0.928482	0.0286146	0.024149		GO:0033018	0.0039887	sarcoplasmic reticulum lumen
GOTERM_BP_DIRECT	GO:0051279~regulation of release of sequestered calcium ion into cytosol	5	0.69735	0.00414618	LYN, DIAPH1, PTK2B, PTPN6, CORO1A	694	19	19308	7.3214	0.999998	0.168346	0.165156		GO:0051279	0.00414618	regulation of release of sequestered calcium ion into cytosol
GOTERM_BP_DIRECT	GO:0051028~mRNA transport	10	1.3947	0.00429085	EIF5A, HNRNPA3, MVP, MAGOH, NUP62, SRSF1, HNRNPA2B1, EIF4A3, HNRNPA1, NUP58	694	88	19308	3.16151	0.999999	0.172014	0.168756		GO:0051028	0.00429085	mRNA transport
GOTERM_BP_DIRECT	GO:0043086~negative regulation of catalytic activity	12	1.67364	0.00448399	DNAJC3, SET, RNH1, ANXA3, YWHAB, ANXA4, GMFG, ANXA5, PDE6D, HNRNPR, IQGAP1, IQGAP2	694	122	19308	2.73652	0.999999	0.17751	0.174147		GO:0043086	0.00448399	negative regulation of catalytic activity
GOTERM_BP_DIRECT	GO:0060397~JAK-STAT cascade involved in growth hormone signaling pathway	4	0.55788	0.00457303	LYN, STAT3, STAT6, JAK1	694	10	19308	11.1285	1	0.177541	0.174178		GO:0060397	0.00457303	JAK-STAT cascade involved in growth hormone signaling pathway
GOTERM_BP_DIRECT	GO:0030866~cortical actin cytoskeleton organization	6	0.83682	0.0045969	ROCK2, EPB41L2, RAB13, NCKAP1L, LCP1, CALR	694	31	19308	5.38477	1	0.177541	0.174178		GO:0030866	0.0045969	cortical actin cytoskeleton organization
GOTERM_MF_DIRECT	GO:0008307~structural constituent of muscle	7	0.97629	0.00463032	KRT19, TPM4, TPM2, TPM1, MYH11, MYL9, PLEC	695	43	18869	4.41971	0.981003	0.0776259	0.073268		GO:0008307	0.00463032	structural constituent of muscle
GOTERM_CC_DIRECT	GO:0101003~ficolin-1-rich granule membrane	8	1.11576	0.00466008	DIAPH1, LGALS3, COPB1, GAA, LAMP2, ITGB2, ITGAX, NCKAP1L	704	61	20562	3.83048	0.954171	0.0330715	0.0279104		GO:0101003	0.00466008	ficolin-1-rich granule membrane
GOTERM_MF_DIRECT	GO:0005080~protein kinase C binding	8	1.11576	0.00472883	TOP2A, MARCKS, GLRX3, PRKCSH, RACK1, FLNA, PKN1, YWHAG	695	57	18869	3.81048	0.982543	0.0777528	0.0733877		GO:0005080	0.00472883	protein kinase C binding
GOTERM_CC_DIRECT	GO:0030425~dendrite	28	3.90516	0.00484209	ERO1A, LRP1, NCF1, NUMA1, RPLP0, EIF4A3, HNRNPR, RBM3, PAK1, TUBB3, DPYSL2, RACK1, CAPN2, PTK2B, CKB, SRSF10, HSPA8, GLRX3, MAP1S, ANXA3, STAT1, CYBB, RAB27A, SEPTIN4, NIN, MAP1B, DBN1, PLEC	704	460	20562	1.77784	0.959382	0.0339976	0.0286919		GO:0030425	0.00484209	dendrite
GOTERM_MF_DIRECT	GO:0002161~aminoacyl-tRNA editing activity	4	0.55788	0.00489782	AARS1, LARS1, IARS1, VARS1	695	10	18869	10.8599	0.984899	0.079012	0.0745762		GO:0002161	0.00489782	aminoacyl-tRNA editing activity
GOTERM_MF_DIRECT	GO:0003746~translation elongation factor activity	6	0.83682	0.00509557	EIF5A, EEF1G, EEF1B2, EEF1D, GFM2, EEF2	695	31	18869	5.25477	0.987257	0.0806799	0.0761505		GO:0003746	0.00509557	translation elongation factor activity
GOTERM_CC_DIRECT	GO:0005903~brush border	8	1.11576	0.0051019	SLC34A2, ACTN1, MYH9, FLNA, FLNB, ITPR3, MYL12B, PLEC	704	62	20562	3.7687	0.965812	0.0354448	0.0299132		GO:0005903	0.0051019	brush border
GOTERM_CC_DIRECT	GO:0030867~rough endoplasmic reticulum membrane	4	0.55788	0.00534611	UBA1, PLOD2, TMEM97, PLOD1	704	11	20562	10.6209	0.970926	0.0360044	0.0303856		GO:0030867	0.00534611	rough endoplasmic reticulum membrane
GOTERM_CC_DIRECT	GO:0005885~Arp2/3 protein complex	4	0.55788	0.00534611	ACTR2, ARPC2, ARPC1B, ARPC5	704	11	20562	10.6209	0.970926	0.0360044	0.0303856		GO:0005885	0.00534611	Arp2/3 protein complex
GOTERM_CC_DIRECT	GO:0099738~cell cortex region	4	0.55788	0.00534611	NUMA1, EPB41L2, CTSZ, MYL12B	704	11	20562	10.6209	0.970926	0.0360044	0.0303856		GO:0099738	0.00534611	cell cortex region
GOTERM_MF_DIRECT	GO:0061608~nuclear import signal receptor activity	5	0.69735	0.00549189	IPO9, TNPO1, TNPO2, KPNB1, IPO5	695	20	18869	6.78741	0.990932	0.0853739	0.0805809		GO:0061608	0.00549189	nuclear import signal receptor activity
GOTERM_CC_DIRECT	GO:0070971~endoplasmic reticulum exit site	6	0.83682	0.00563255	SEC23A, SAR1A, PDCD6, SEC24D, SEC23B, SEC31A	704	34	20562	5.15424	0.975959	0.0375503	0.0316902		GO:0070971	0.00563255	endoplasmic reticulum exit site
GOTERM_BP_DIRECT	GO:0034198~cellular response to amino acid starvation	7	0.97629	0.00577198	SH3GLB1, DAP, MAP1LC3A, LARS1, EIF2S1, GCN1, MAP3K5	694	46	19308	4.23368	1	0.220239	0.216067		GO:0034198	0.00577198	cellular response to amino acid starvation
GOTERM_BP_DIRECT	GO:0050821~protein stabilization	17	2.37099	0.00604102	RPS7, SEL1L, RPL11, HIP1R, STK4, IRGM, CDC37, RUVBL2, LAMP2, BAG1, FLNA, CALR, SUGT1, PFN1, PPIB, HSPA1B, HSPA1A	694	220	19308	2.14983	1	0.222837	0.218616		GO:0050821	0.00604102	protein stabilization
GOTERM_BP_DIRECT	GO:0001666~response to hypoxia	15	2.09205	0.00610362	POSTN, MMP2, ITPR2, PLOD2, PLOD1, CYGB, TM9SF4, HK2, HSP90B1, PDLIM1, PAK1, SCFD1, CASP1, CAPN2, PTK2B	694	182	19308	2.29297	1	0.222837	0.218616		GO:0001666	0.00610362	response to hypoxia
GOTERM_BP_DIRECT	GO:0019885~antigen processing and presentation of endogenous peptide antigen via MHC class I	4	0.55788	0.00612152	ERAP1, TAP2, TAP1, B2M	694	11	19308	10.1168	1	0.222837	0.218616		GO:0019885	0.00612152	antigen processing and presentation of endogenous peptide antigen via MHC class I
GOTERM_BP_DIRECT	GO:0006613~cotranslational protein targeting to membrane	4	0.55788	0.00612152	SEC61A1, TRAM1, SRPRA, SSR1	694	11	19308	10.1168	1	0.222837	0.218616		GO:0006613	0.00612152	cotranslational protein targeting to membrane
GOTERM_BP_DIRECT	GO:0098869~cellular oxidant detoxification	9	1.25523	0.00629816	GSTM2, PRDX4, TXNL1, PXDN, GPX7, SELENOF, EPX, S100A9, CYGB	694	77	19308	3.25184	1	0.226662	0.222368		GO:0098869	0.00629816	cellular oxidant detoxification
GOTERM_CC_DIRECT	GO:0030175~filopodium	9	1.25523	0.00643004	VASP, SHTN1, RIPOR2, B4GALT1, TUBB3, FSCN1, LCP1, IQGAP2, DEF6	704	81	20562	3.24527	0.985843	0.0424383	0.0358153		GO:0030175	0.00643004	filopodium
GOTERM_CC_DIRECT	GO:0048500~signal recognition particle	3	0.41841	0.00668948	SRP72, SRP54, SRP68	704	4	20562	21.9055	0.988084	0.0437134	0.0368915		GO:0048500	0.00668948	signal recognition particle
GOTERM_BP_DIRECT	GO:0043484~regulation of RNA splicing	9	1.25523	0.00680336	PTBP1, RBFOX2, FUS, HNRNPF, TRA2B, SRSF1, HNRNPH2, HNRNPA1, SRSF10	694	78	19308	3.21015	1	0.242093	0.237506		GO:0043484	0.00680336	regulation of RNA splicing
GOTERM_CC_DIRECT	GO:0032587~ruffle membrane	10	1.3947	0.00680967	DIAPH1, ARF4, MACF1, PAK1, TPM1, CFL1, HIP1R, RPS3, LCP1, CORO1C	704	99	20562	2.95024	0.988999	0.0440626	0.0371861		GO:0032587	0.00680967	ruffle membrane
GOTERM_BP_DIRECT	GO:0051085~chaperone mediated protein folding requiring cofactor	6	0.83682	0.00689253	ERO1A, HSPA8, HSPA5, BAG1, HSPA1B, HSPA1A	694	34	19308	4.90965	1	0.24254	0.237945		GO:0051085	0.00689253	chaperone mediated protein folding requiring cofactor
GOTERM_CC_DIRECT	GO:0033017~sarcoplasmic reticulum membrane	6	0.83682	0.00721616	CAMK2D, REEP5, TMEM109, ITPR2, SRI, CAMK2G	704	36	20562	4.8679	0.991603	0.0462395	0.0390233		GO:0033017	0.00721616	sarcoplasmic reticulum membrane
GOTERM_BP_DIRECT	GO:0048210~Golgi vesicle fusion to target membrane	3	0.41841	0.00735518	RAB13, RAB8A, RAB8B	694	4	19308	20.866	1	0.255977	0.251127		GO:0048210	0.00735518	Golgi vesicle fusion to target membrane
GOTERM_MF_DIRECT	GO:0016972~thiol oxidase activity	3	0.41841	0.00771437	ERO1A, TMX3, P4HB	695	4	18869	20.3622	0.998658	0.117782	0.11117		GO:0016972	0.00771437	thiol oxidase activity
GOTERM_BP_DIRECT	GO:0031032~actomyosin structure organization	6	0.83682	0.00780875	ROCK2, EPB41L2, MYO18A, MYH9, MYH11, MYH10	694	35	19308	4.76937	1	0.265917	0.260879		GO:0031032	0.00780875	actomyosin structure organization
GOTERM_BP_DIRECT	GO:0045773~positive regulation of axon extension	6	0.83682	0.00780875	SHTN1, MACF1, PAK1, MAP1B, FN1, DBN1	694	35	19308	4.76937	1	0.265917	0.260879		GO:0045773	0.00780875	positive regulation of axon extension
GOTERM_BP_DIRECT	GO:0071394~cellular response to testosterone stimulus	4	0.55788	0.00794645	RWDD1, NCF1, ROCK2, SPP1	694	12	19308	9.27378	1	0.267728	0.262655		GO:0071394	0.00794645	cellular response to testosterone stimulus
GOTERM_CC_DIRECT	GO:0015630~microtubule cytoskeleton	15	2.09205	0.00798359	SEPTIN2, SEPTIN4, IQGAP1, TUBB4B, SEPTIN9, GTF2F2, SEPTIN11, SEPTIN7, SEPTIN8, SHTN1, TUBA1C, TUBB6, TUBB2B, TUBB2A, TUBB3	704	197	20562	2.22391	0.99496	0.0506651	0.0427583		GO:0015630	0.00798359	microtubule cytoskeleton
GOTERM_BP_DIRECT	GO:0007030~Golgi organization	12	1.67364	0.00803731	VMP1, LMAN1, TMED9, SEC23IP, TMED10, ATL3, MYO18A, TMED3, DYM, TRIP11, TMED2, RAB8A	694	132	19308	2.52921	1	0.267939	0.262862		GO:0007030	0.00803731	Golgi organization
GOTERM_BP_DIRECT	GO:0006376~mRNA splice site selection	5	0.69735	0.00845623	PUF60, SRSF1, LUC7L, SRSF10, LUC7L2	694	23	19308	6.04811	1	0.277635	0.272375		GO:0006376	0.00845623	mRNA splice site selection
GOTERM_BP_DIRECT	GO:0030433~ubiquitin-dependent ERAD pathway	9	1.25523	0.00850351	ERLEC1, HSPA5, SEL1L, CANX, TRIM25, SEC61B, STT3B, CALR, HSP90B1	694	81	19308	3.09126	1	0.277635	0.272375		GO:0030433	0.00850351	ubiquitin-dependent ERAD pathway
GOTERM_CC_DIRECT	GO:0072686~mitotic spindle	12	1.67364	0.00871751	DIAPH1, TUBB2B, TUBB6, NIN, TUBB2A, NUMA1, TUBB3, NUP62, TPR, WDR5, RPS3, TUBB4B	704	140	20562	2.50349	0.996908	0.0547958	0.0462443		GO:0072686	0.00871751	mitotic spindle
GOTERM_CC_DIRECT	GO:0042641~actomyosin	4	0.55788	0.00880622	MYO18A, MYH9, MYH10, DBN1	704	13	20562	8.98689	0.997085	0.0548312	0.0462742		GO:0042641	0.00880622	actomyosin
GOTERM_CC_DIRECT	GO:0045335~phagocytic vesicle	8	1.11576	0.00912684	PDIA3, PLD4, FLNB, VIM, CORO1A, CTSS, RAB8A, RAB8B	704	69	20562	3.38636	0.997645	0.0562964	0.0475108		GO:0045335	0.00912684	phagocytic vesicle
GOTERM_BP_DIRECT	GO:0032956~regulation of actin cytoskeleton organization	9	1.25523	0.00913534	PAK1, LRP1, ROCK2, FSCN1, HIP1R, RAC2, IQGAP1, IQGAP2, CORO1A	694	82	19308	3.05356	1	0.295221	0.289628		GO:0032956	0.00913534	regulation of actin cytoskeleton organization
GOTERM_BP_DIRECT	GO:0045109~intermediate filament organization	8	1.11576	0.00926026	KRT19, DES, KRT8, KRT7, VIM, KRT75, PLEC, PRPH	694	66	19308	3.37228	1	0.296235	0.290623		GO:0045109	0.00926026	intermediate filament organization
GOTERM_MF_DIRECT	GO:0004197~cysteine-type endopeptidase activity	10	1.3947	0.00940545	PDIA3, USP14, CASP6, CTSL, CTSZ, CASP1, CTSD, CTSS, CTSC, LGMN	695	97	18869	2.79893	0.999687	0.141082	0.133161		GO:0004197	0.00940545	cysteine-type endopeptidase activity
GOTERM_CC_DIRECT	GO:0044322~endoplasmic reticulum quality control compartment	5	0.69735	0.00967239	ERLEC1, CANX, SEC61B, CALR, UGGT1	704	25	20562	5.84148	0.998363	0.0591091	0.0498845		GO:0044322	0.00967239	endoplasmic reticulum quality control compartment
GOTERM_BP_DIRECT	GO:0008285~negative regulation of cell proliferation	28	3.90516	0.00982805	CSF1R, IFITM1, SMARCB1, TES, B4GALT1, CTBP2, DPT, IFI35, STK4, RBPJ, TIAL1, GPNMB, FTH1, NUP62, LMNA, PTK2B, IGFBP7, CSK, BAK1, LYN, MAP2K1, ITGA1, STAT3, ALDH1A2, CDH13, PTPN6, HSPA1B, HSPA1A	694	464	19308	1.67887	1	0.310066	0.304191		GO:0008285	0.00982805	negative regulation of cell proliferation
GOTERM_BP_DIRECT	GO:0006401~RNA catabolic process	6	0.83682	0.00988842	TTC37, DIS3, HNRNPD, SND1	694	37	19308	4.51157	1	0.310066	0.304191		GO:0006401	0.00988842	RNA catabolic process
GOTERM_BP_DIRECT	GO:0001913~T cell mediated cytotoxicity	4	0.55788	0.010058	PPP3CB, TAP2, B2M, CTSC	694	13	19308	8.56041	1	0.310865	0.304976		GO:0001913	0.010058	T cell mediated cytotoxicity
GOTERM_BP_DIRECT	GO:0045087~innate immune response	34	4.74198	0.0101102	C1QB, APCS, USP14, CSF1R, ITGAM, DDX3X, C1S, NCF1, CLEC10A, PLD4, C4BPA, CD1D, IFI35, CORO1A, IPO7, LGALS3, C6, TRIM28, TRIM29, PTK2B, TRIM25, CD14, FCGR1A, B2M, MAP3K5, LYN, ANXA1, GP2, CYBB, IRGM, SERPING1, TTLL12, S100A9, C1QC	694	599	19308	1.57917	1	0.310865	0.304976		GO:0045087	0.0101102	innate immune response
GOTERM_BP_DIRECT	GO:0007568~aging	15	2.09205	0.0104519	LRP1, RPN2, CNP, SERPINF1, MMP2, ITGB2, STAT3, EEF2, EIF2S1, DCN, PPP3CA, CANX, SERPING1, BAK1, CTSC	694	194	19308	2.15113	1	0.315965	0.309979		GO:0007568	0.0104519	aging
GOTERM_BP_DIRECT	GO:0007162~negative regulation of cell adhesion	7	0.97629	0.0104756	RIPOR2, MMP2, ARHGDIA, ARHGDIB, TNC, CDH13, FBLN1	694	52	19308	3.74518	1	0.315965	0.309979		GO:0007162	0.0104756	negative regulation of cell adhesion
GOTERM_BP_DIRECT	GO:0016192~vesicle-mediated transport	17	2.37099	0.0106274	HSPA8, ARF4, COPB2, COPA, SEC23A, SAR1A, GOLT1B, COPB1, RAB27A, RAB27B, ARFGAP3, SCFD1, COPG1, AP3S1, SEC23B, HSPA1B, HSPA1A	694	234	19308	2.02121	1	0.317519	0.311504		GO:0016192	0.0106274	vesicle-mediated transport
GOTERM_MF_DIRECT	GO:0008143~poly(A) binding	5	0.69735	0.0107246	SYNCRIP, DDX3X, HNRNPDL, EIF4A3, PABPC1	695	24	18869	5.65618	0.9999	0.15595	0.147195		GO:0008143	0.0107246	poly(A) binding
GOTERM_MF_DIRECT	GO:0005524~ATP binding	75	10.4603	0.0107615	EIF4A2, TOP2A, EIF4A1, DDX3X, DDX46, EIF4A3, OLA1, YARS1, HK2, STK10, HK3, SLK, NARS1, RUVBL2, MYO18A, JAK1, MAP3K5, ACTR2, MAP2K1, RARS1, UBE2E3, MARS1, TAP2, TAP1, GTF2F2, KIF27, DARS1, RAB33B, SARS1, DDX39A, LARS1, MYH9, TTLL12, TARS1, CSF1R, AARS1, CAMK2D, ROCK2, KARS1, UBA5, DNAH5, STK4, HSP90B1, PAK1, PTK2B, MYH11, CSK, CKB, IARS1, MYH10, CAMK2G, PAK2, PMS1, ABCF1, VARS1, LYN, DNAH12, HSPA8…	695	1545	18869	1.31794	0.999903	0.15595	0.147195		GO:0005524	0.0107615	ATP binding
GOTERM_CC_DIRECT	GO:1990111~spermatoproteasome complex	3	0.41841	0.0108972	PSMB8, PSMB10, PSMB9	704	5	20562	17.5244	0.999277	0.0649698	0.0548305		GO:1990111	0.0108972	spermatoproteasome complex
GOTERM_CC_DIRECT	GO:0036021~endolysosome lumen	3	0.41841	0.0108972	CTSL, CTSS, LGMN	704	5	20562	17.5244	0.999277	0.0649698	0.0548305		GO:0036021	0.0108972	endolysosome lumen
GOTERM_CC_DIRECT	GO:0031089~platelet dense granule lumen	4	0.55788	0.0109267	LGALS3BP, CLEC3B, FAM3C, SERPINA4	704	14	20562	8.34497	0.999291	0.0649698	0.0548305		GO:0031089	0.0109267	platelet dense granule lumen
GOTERM_BP_DIRECT	GO:0045921~positive regulation of exocytosis	5	0.69735	0.0114167	RAB3A, ANXA2, RAB27A, RAB27B, S100A10	694	25	19308	5.56427	1	0.330344	0.324085		GO:0045921	0.0114167	positive regulation of exocytosis
GOTERM_BP_DIRECT	GO:0034314~Arp2/3 complex-mediated actin nucleation	5	0.69735	0.0114167	ACTR2, ARPC2, ARPC1B, ARPC5, IQGAP2	694	25	19308	5.56427	1	0.330344	0.324085		GO:0034314	0.0114167	Arp2/3 complex-mediated actin nucleation
GOTERM_BP_DIRECT	GO:0006956~complement activation	5	0.69735	0.0114167	C1QB, CFD, C6, C8G, C9	694	25	19308	5.56427	1	0.330344	0.324085		GO:0006956	0.0114167	complement activation
GOTERM_BP_DIRECT	GO:1990592~protein K69-linked ufmylation	3	0.41841	0.0119679	UFL1, DDRGK1, UBA5	694	5	19308	16.6928	1	0.330344	0.324085		GO:1990592	0.0119679	protein K69-linked ufmylation
GOTERM_BP_DIRECT	GO:1903307~positive regulation of regulated secretory pathway	3	0.41841	0.0119679	RAB3A, RAB3D, RAB27A	694	5	19308	16.6928	1	0.330344	0.324085		GO:1903307	0.0119679	positive regulation of regulated secretory pathway
GOTERM_BP_DIRECT	GO:0070370~cellular heat acclimation	3	0.41841	0.0119679	RBBP7, HSPA1B, HSPA1A	694	5	19308	16.6928	1	0.330344	0.324085		GO:0070370	0.0119679	cellular heat acclimation
GOTERM_BP_DIRECT	GO:1903895~negative regulation of IRE1-mediated unfolded protein response	3	0.41841	0.0119679	UFL1, HSPA5, DDRGK1	694	5	19308	16.6928	1	0.330344	0.324085		GO:1903895	0.0119679	negative regulation of IRE1-mediated unfolded protein response
GOTERM_MF_DIRECT	GO:0008234~cysteine-type peptidase activity	6	0.83682	0.0121969	CASP6, CTSL, CTSZ, CAPN2, CTSS, CTSC	695	38	18869	4.28679	0.999972	0.172997	0.163285		GO:0008234	0.0121969	cysteine-type peptidase activity
GOTERM_BP_DIRECT	GO:0045214~sarcomere organization	6	0.83682	0.0123194	KRT19, WDR1, TPM1, KRT8, FLNC, PLEC	694	39	19308	4.2802	1	0.330344	0.324085		GO:0045214	0.0123194	sarcomere organization
GOTERM_BP_DIRECT	GO:0097284~hepatocyte apoptotic process	4	0.55788	0.0124643	KRT18, CASP6, KRT8, STK4	694	14	19308	7.94895	1	0.330344	0.324085		GO:0097284	0.0124643	hepatocyte apoptotic process
GOTERM_BP_DIRECT	GO:0006465~signal peptide processing	4	0.55788	0.0124643	SPCS3, SPCS2, SPCS1, SEC11A	694	14	19308	7.94895	1	0.330344	0.324085		GO:0006465	0.0124643	signal peptide processing
GOTERM_BP_DIRECT	GO:0051764~actin crosslink formation	4	0.55788	0.0124643	MARCKS, DPYSL3, FLNA, LCP1	694	14	19308	7.94895	1	0.330344	0.324085		GO:0051764	0.0124643	actin crosslink formation
GOTERM_BP_DIRECT	GO:1900025~negative regulation of substrate adhesion-dependent cell spreading	4	0.55788	0.0124643	POSTN, RCC2, FBLN1, CORO1C	694	14	19308	7.94895	1	0.330344	0.324085		GO:1900025	0.0124643	negative regulation of substrate adhesion-dependent cell spreading
GOTERM_BP_DIRECT	GO:0034605~cellular response to heat	7	0.97629	0.012517	LYN, HDAC2, PDCD6, TPR, EIF2S1, HSPA1B, HSPA1A	694	54	19308	3.60647	1	0.330344	0.324085		GO:0034605	0.012517	cellular response to heat
GOTERM_BP_DIRECT	GO:0042149~cellular response to glucose starvation	7	0.97629	0.012517	SH3GLB1, SLC7A5, TBL2, HSPA5, ASNS, UPP1, HNRNPA1	694	54	19308	3.60647	1	0.330344	0.324085		GO:0042149	0.012517	cellular response to glucose starvation
GOTERM_MF_DIRECT	GO:0050815~phosphoserine binding	3	0.41841	0.0125448	YWHAB, NEDD4, YWHAZ	695	5	18869	16.2898	0.999979	0.172997	0.163285		GO:0050815	0.0125448	phosphoserine binding
GOTERM_MF_DIRECT	GO:0050733~RS domain binding	3	0.41841	0.0125448	LUC7L, U2AF1, SRSF10	695	5	18869	16.2898	0.999979	0.172997	0.163285		GO:0050733	0.0125448	RS domain binding
GOTERM_BP_DIRECT	GO:0006508~proteolysis	25	3.48675	0.0131308	CFD, CPB1, C1S, CTSZ, CTSS, DPP3, ZMPSTE24, DPP7, CAPNS1, CASP6, CTSL, CASP1, CAPN2, AGA, CTSE, CTSD, CTSC, MMP2, CTRB1, ERAP1, MMP12, SPCS3, SPCS1, THOP1, LGMN	694	409	19308	1.70057	1	0.34368	0.337169		GO:0006508	0.0131308	proteolysis
GOTERM_MF_DIRECT	GO:0097110~scaffold protein binding	8	1.11576	0.0132469	LYN, CD163, MAP2K1, KRT18, CDC37, KRT8, ITPR2, VIM	695	69	18869	3.14778	0.999989	0.175136	0.165303		GO:0097110	0.0132469	scaffold protein binding
GOTERM_MF_DIRECT	GO:0017070~U6 snRNA binding	4	0.55788	0.0133144	EIF5A, LSM8, RBM22, LSM2	695	14	18869	7.75704	0.999989	0.175136	0.165303		GO:0017070	0.0133144	U6 snRNA binding
GOTERM_MF_DIRECT	GO:0005095~GTPase inhibitor activity	4	0.55788	0.0133144	PDE6D, IQGAP1, IQGAP2, IPO5	695	14	18869	7.75704	0.999989	0.175136	0.165303		GO:0005095	0.0133144	GTPase inhibitor activity
GOTERM_BP_DIRECT	GO:0010977~negative regulation of neuron projection development	8	1.11576	0.013577	HDAC2, LGALS1, LRP1, DPYSL3, CTSZ, FLNA, VIM, B2M	694	71	19308	3.1348	1	0.351091	0.344439		GO:0010977	0.013577	negative regulation of neuron projection development
GOTERM_BP_DIRECT	GO:0006986~response to unfolded protein	7	0.97629	0.0136357	DNAJC3, HSPA8, TRAM1, SERPINH1, STT3B, MANF, HSPA1A	694	55	19308	3.5409	1	0.351091	0.344439		GO:0006986	0.0136357	response to unfolded protein
GOTERM_CC_DIRECT	GO:0030054~cell junction	16	2.23152	0.0139178	MACF1, TES, WDR1, MAP1S, ITGB4, ACTN1, PUF60, EPB41L2, RAB13, DSG2, CPNE3, LCP1, S100A9, FBP2, TJP3, RAI14	704	232	20562	2.0143	0.999904	0.0820156	0.0692162		GO:0030054	0.0139178	cell junction
GOTERM_MF_DIRECT	GO:0048027~mRNA 5'-UTR binding	5	0.69735	0.0142415	SYNCRIP, DDX3X, RPS7, NCL, MYH10	695	26	18869	5.22108	0.999995	0.184492	0.174134		GO:0048027	0.0142415	mRNA 5'-UTR binding
GOTERM_CC_DIRECT	GO:0001891~phagocytic cup	5	0.69735	0.0144444	ANXA1, RACK1, LCP1, IRGM, CORO1A	704	28	20562	5.2156	0.999932	0.0836255	0.0705748		GO:0001891	0.0144444	phagocytic cup
GOTERM_CC_DIRECT	GO:0008305~integrin complex	5	0.69735	0.0144444	ITGAM, ITGB4, ITGA1, ITGB2, ITGAX	704	28	20562	5.2156	0.999932	0.0836255	0.0705748		GO:0008305	0.0144444	integrin complex
GOTERM_MF_DIRECT	GO:0004175~endopeptidase activity	9	1.25523	0.014675	MMP12, PSMA5, CMA1, MMP2, ERAP1, CASP1, PSMB8, PSMB10, PSMB9	695	87	18869	2.80858	0.999997	0.187271	0.176758		GO:0004175	0.014675	endopeptidase activity
GOTERM_BP_DIRECT	GO:0001916~positive regulation of T cell mediated cytotoxicity	5	0.69735	0.0149713	PTPRC, TAP2, CD1D, CYRIB, B2M	694	27	19308	5.1521	1	0.378326	0.371159		GO:0001916	0.0149713	positive regulation of T cell mediated cytotoxicity
GOTERM_BP_DIRECT	GO:0051179~localization	5	0.69735	0.0149713	PAK1, ANXA1, HNRNPA1, RAB6A, PAK2	694	27	19308	5.1521	1	0.378326	0.371159		GO:0051179	0.0149713	localization
GOTERM_BP_DIRECT	GO:0097435~supramolecular fiber organization	4	0.55788	0.0151713	FKBP1A, MFAP4, COL3A1, COL5A1	694	15	19308	7.41902	1	0.378326	0.371159		GO:0097435	0.0151713	supramolecular fiber organization
GOTERM_BP_DIRECT	GO:0033120~positive regulation of RNA splicing	4	0.55788	0.0151713	U2AF2, SRSF1, RBM22, HSPA1A	694	15	19308	7.41902	1	0.378326	0.371159		GO:0033120	0.0151713	positive regulation of RNA splicing
GOTERM_BP_DIRECT	GO:0045766~positive regulation of angiogenesis	13	1.81311	0.0153778	ANXA3, CMA1, PDCD6, ERAP1, ITGB2, STAT3, CYBB, HK2, MYDGF, ANGPTL3, ITGAX, PTK2B, EMILIN1	694	164	19308	2.20535	1	0.380481	0.373273		GO:0045766	0.0153778	positive regulation of angiogenesis
GOTERM_CC_DIRECT	GO:0060473~cortical granule	3	0.41841	0.0159774	HEXB, MYH9, CALR	704	6	20562	14.6037	0.999976	0.0893652	0.0754188		GO:0060473	0.0159774	cortical granule
GOTERM_CC_DIRECT	GO:0097227~sperm annulus	3	0.41841	0.0159774	SEPTIN2, SEPTIN4, SEPTIN7	704	6	20562	14.6037	0.999976	0.0893652	0.0754188		GO:0097227	0.0159774	sperm annulus
GOTERM_CC_DIRECT	GO:0055087~Ski complex	3	0.41841	0.0159774	TTC37	704	6	20562	14.6037	0.999976	0.0893652	0.0754188		GO:0055087	0.0159774	Ski complex
GOTERM_CC_DIRECT	GO:0005784~Sec61 translocon complex	3	0.41841	0.0159774	SEC61A1, SSR4, SEC61B	704	6	20562	14.6037	0.999976	0.0893652	0.0754188		GO:0005784	0.0159774	Sec61 translocon complex
GOTERM_MF_DIRECT	GO:0036002~pre-mRNA binding	4	0.55788	0.0161954	PTBP1, TRA2B, HNRNPA1, RBM22	695	15	18869	7.2399	0.999999	0.201273	0.189973		GO:0036002	0.0161954	pre-mRNA binding
GOTERM_MF_DIRECT	GO:0008139~nuclear localization sequence binding	5	0.69735	0.0162431	TNPO1, TNPO2, NUP58, KPNB1, IPO5	695	27	18869	5.02771	0.999999	0.201273	0.189973		GO:0008139	0.0162431	nuclear localization sequence binding
GOTERM_CC_DIRECT	GO:0000139~Golgi membrane	34	4.74198	0.0162526	COPB2, COPA, SEC23A, TMED10, B4GALT1, GOLT1B, NUMA1, TMEM167A, COPB1, PLD3, LMAN1, GOLGA3, SCFD1, GOLGA1, MYO18A, TMED3, TMED2, NCAM1, GBP2, RAB6A, B2M, RAB8A, SH3GLB1, TMED9, COPZ2, FNDC3A, ARFGAP3, IRGM, ARCN1, RAB33B, TRIP11, COPG1, SEC22B, COPE	704	651	20562	1.52542	0.99998	0.0900744	0.0760173		GO:0000139	0.0162526	Golgi membrane
GOTERM_CC_DIRECT	GO:0030864~cortical actin cytoskeleton	7	0.97629	0.0163772	CAP1, WDR1, ACTN1, CAPN2, IQGAP1, CORO1A, DBN1	704	60	20562	3.40753	0.999982	0.0900744	0.0760173		GO:0030864	0.0163772	cortical actin cytoskeleton
GOTERM_BP_DIRECT	GO:0016477~cell migration	18	2.51046	0.0165478	ARF4, ITGB4, SH3KBP1, ITGB2, ARPC5, IQGAP1, CORO1A, CORO1B, CORO1C, PAK1, NARS1, COL5A1, FSCN1, MYO18A, EMILIN1, NCKAP1L, LCP1, CD44	694	267	19308	1.87559	1	0.40318	0.395542		GO:0016477	0.0165478	cell migration
GOTERM_BP_DIRECT	GO:0003007~heart morphogenesis	6	0.83682	0.0166772	FKBP1A, COL5A1, GAA, ALDH1A2, FLNA, ZMPSTE24	694	42	19308	3.97448	1	0.40318	0.395542		GO:0003007	0.0166772	heart morphogenesis
GOTERM_BP_DIRECT	GO:0006953~acute-phase response	6	0.83682	0.0166772	APCS, CD163, SERPINF2, STAT3, FN1, REG3G	694	42	19308	3.97448	1	0.40318	0.395542		GO:0006953	0.0166772	acute-phase response
GOTERM_CC_DIRECT	GO:0031982~vesicle	13	1.81311	0.0166857	SLC34A2, ANXA1, ANXA2, YWHAZ, CORO1C, TUBA1C, DPP7, CFL1, SPP1, TAGLN2, HSPA1B, MYO1F, HSPA1A	704	174	20562	2.18216	0.999985	0.0910128	0.0768093		GO:0031982	0.0166857	vesicle
GOTERM_BP_DIRECT	GO:0034620~cellular response to unfolded protein	5	0.69735	0.0169824	HSPA8, HSPA5, BAK1, HSPA1B, HSPA1A	694	28	19308	4.96809	1	0.407448	0.399729		GO:0034620	0.0169824	cellular response to unfolded protein
GOTERM_CC_DIRECT	GO:0035861~site of double-strand break	8	1.11576	0.0172163	UFL1, ACTR2, PARP3, ARPC2, PARP1, LMNA, ARPC5, PRPF19	704	78	20562	2.99563	0.999989	0.0931371	0.0786021		GO:0035861	0.0172163	site of double-strand break
GOTERM_BP_DIRECT	GO:0010632~regulation of epithelial cell migration	3	0.41841	0.0175274	MACF1, ARSB, CORO1C	694	6	19308	13.9107	1	0.408156	0.400424		GO:0010632	0.0175274	regulation of epithelial cell migration
GOTERM_BP_DIRECT	GO:0060706~cell differentiation involved in embryonic placenta development	3	0.41841	0.0175274	KRT19, KRT8, STK4	694	6	19308	13.9107	1	0.408156	0.400424		GO:0060706	0.0175274	cell differentiation involved in embryonic placenta development
GOTERM_BP_DIRECT	GO:0071569~protein ufmylation	3	0.41841	0.0175274	UFL1, DDRGK1, UBA5	694	6	19308	13.9107	1	0.408156	0.400424		GO:0071569	0.0175274	protein ufmylation
GOTERM_BP_DIRECT	GO:0042921~glucocorticoid receptor signaling pathway	3	0.41841	0.0175274	NEDD4, CALR, YWHAH	694	6	19308	13.9107	1	0.408156	0.400424		GO:0042921	0.0175274	glucocorticoid receptor signaling pathway
GOTERM_BP_DIRECT	GO:0031175~neuron projection development	11	1.53417	0.017898	LYN, SEPTIN2, NEDD4, RAB13, STMN1, WDR5, TNC, PTK2B, VIM, RAB6A, MANF	694	129	19308	2.37236	1	0.41179	0.403988		GO:0031175	0.017898	neuron projection development
GOTERM_BP_DIRECT	GO:0002244~hematopoietic progenitor cell differentiation	8	1.11576	0.0179435	TOP2A, LYN, CSF1R, PTPRC, PLD4, PTPN6, EEF2, KRT75	694	75	19308	2.96761	1	0.41179	0.403988		GO:0002244	0.0179435	hematopoietic progenitor cell differentiation
GOTERM_BP_DIRECT	GO:0030214~hyaluronan catabolic process	4	0.55788	0.018183	HEXB, HEXA, GUSB, CD44	694	16	19308	6.95533	1	0.414284	0.406435		GO:0030214	0.018183	hyaluronan catabolic process
GOTERM_CC_DIRECT	GO:0002102~podosome	5	0.69735	0.0183262	TPM4, WDR1, FSCN1, LCP1, FERMT3	704	30	20562	4.8679	0.999995	0.0983356	0.0829892		GO:0002102	0.0183262	podosome
GOTERM_BP_DIRECT	GO:1901216~positive regulation of neuron death	6	0.83682	0.0183304	ITGAM, PARP1, ITGB2, CAPN2, EIF2S1, MAP3K5	694	43	19308	3.88205	1	0.41466	0.406804		GO:1901216	0.0183304	positive regulation of neuron death
GOTERM_MF_DIRECT	GO:0045545~syndecan binding	3	0.41841	0.0183614	GPNMB, TNC, HPSE	695	6	18869	13.5748	1	0.218042	0.205801		GO:0045545	0.0183614	syndecan binding
GOTERM_MF_DIRECT	GO:0055131~C3HC4-type RING finger domain binding	3	0.41841	0.0183614	HSPA8, HSPA1B, HSPA1A	695	6	18869	13.5748	1	0.218042	0.205801		GO:0055131	0.0183614	C3HC4-type RING finger domain binding
GOTERM_MF_DIRECT	GO:0019834~phospholipase A2 inhibitor activity	3	0.41841	0.0183614	ANXA1, ANXA2, ANXA3	695	6	18869	13.5748	1	0.218042	0.205801		GO:0019834	0.0183614	phospholipase A2 inhibitor activity
GOTERM_BP_DIRECT	GO:0031647~regulation of protein stability	9	1.25523	0.0185872	SH3GLB1, HSPA8, DAD1, DDRGK1, LAMP2, LMNA, SUGT1, DDOST, SEPTIN8	694	93	19308	2.69239	1	0.417486	0.409577		GO:0031647	0.0185872	regulation of protein stability
GOTERM_BP_DIRECT	GO:0071230~cellular response to amino acid stimulus	7	0.97629	0.0188086	COL3A1, LARS1, MMP2, COL6A1, HNRNPD, CAPN2, IPO5	694	59	19308	3.30084	1	0.419486	0.411538		GO:0071230	0.0188086	cellular response to amino acid stimulus
GOTERM_CC_DIRECT	GO:0099524~postsynaptic cytosol	4	0.55788	0.0189199	HSPA8, EIF4A3, EIF4E, DBN1	704	17	20562	6.87233	0.999997	0.0998969	0.0843069		GO:0099524	0.0189199	postsynaptic cytosol
GOTERM_CC_DIRECT	GO:0071004~U2-type prespliceosome	4	0.55788	0.0189199	U2AF2, SNRPG, LUC7L, LUC7L2	704	17	20562	6.87233	0.999997	0.0998969	0.0843069		GO:0071004	0.0189199	U2-type prespliceosome
GOTERM_BP_DIRECT	GO:0031116~positive regulation of microtubule polymerization	5	0.69735	0.0191543	PAK1, NIN, NUMA1, MAP1B, RPS3	694	29	19308	4.79678	1	0.421677	0.413689		GO:0031116	0.0191543	positive regulation of microtubule polymerization
GOTERM_BP_DIRECT	GO:0097190~apoptotic signaling pathway	8	1.11576	0.0191732	DAP, ITGAM, PDCD6, CASP1, ANXA6, BAK1, RAI14, MAP3K5	694	76	19308	2.92856	1	0.421677	0.413689		GO:0097190	0.0191732	apoptotic signaling pathway
GOTERM_BP_DIRECT	GO:0032355~response to estradiol	10	1.3947	0.0194715	POSTN, PCNA, ANXA1, MAP1B, ALDH1A2, ARPC1B, STAT3, CALR, EEF2, ENO2	694	112	19308	2.48405	1	0.425285	0.417228		GO:0032355	0.0194715	response to estradiol
GOTERM_MF_DIRECT	GO:0005516~calmodulin binding	15	2.09205	0.0196462	CAMK2D, EDF1, AEBP1, IQGAP1, IQGAP2, PPP3CA, MARCKS, PPP3CB, CALD1, MYH9, MYH11, CAMK1, CAMK2G, MYH10, MYO1F	695	205	18869	1.98656	1	0.230103	0.217185		GO:0005516	0.0196462	calmodulin binding
GOTERM_BP_DIRECT	GO:0007566~embryo implantation	6	0.83682	0.0200881	VMP1, TRIM28, MMP2, SPP1, FBLN1, IGFBP7	694	44	19308	3.79382	1	0.435747	0.427492		GO:0007566	0.0200881	embryo implantation
GOTERM_CC_DIRECT	GO:0014069~postsynaptic density	17	2.37099	0.0217675	LYN, ACTR2, HNRNPA3, RPL12, STAT3, RPLP0, HIP1R, RPL10A, MAP1B, RPS3, PTK2B, HNRNPH2, CAMK1, PAK2, EIF3A, RAB8A, DBN1	704	267	20562	1.85965	1	0.112395	0.0948549		GO:0014069	0.0217675	postsynaptic density
GOTERM_CC_DIRECT	GO:0005579~membrane attack complex	3	0.41841	0.0218658	C6, C8G, C9	704	7	20562	12.5175	1	0.112395	0.0948549		GO:0005579	0.0218658	membrane attack complex
GOTERM_CC_DIRECT	GO:0030663~COPI-coated vesicle membrane	3	0.41841	0.0218658	COPB2, COPA, TMED2	704	7	20562	12.5175	1	0.112395	0.0948549		GO:0030663	0.0218658	COPI-coated vesicle membrane
GOTERM_BP_DIRECT	GO:0070527~platelet aggregation	6	0.83682	0.0219526	FN1, MYH9, FLNA, PTPN6, MYL9, FERMT3	694	45	19308	3.70951	1	0.472951	0.463991		GO:0070527	0.0219526	platelet aggregation
GOTERM_MF_DIRECT	GO:0008022~protein C-terminus binding	15	2.09205	0.0219572	TOP2A, MAP2K1, RAB3A, PCNA, NUMA1, YWHAB, FN1, FBLN1, CORO1A, FBLN5, YWHAQ, NCL, PTK2B, CSK, PABPC1	695	208	18869	1.95791	1	0.251518	0.237398		GO:0008022	0.0219572	protein C-terminus binding
GOTERM_MF_DIRECT	GO:0051879~Hsp90 protein binding	6	0.83682	0.022063	GUCY1B1, CDC37, ARHGDIA, NUP62, RPS3, KPNB1	695	44	18869	3.70222	1	0.251518	0.237398		GO:0051879	0.022063	Hsp90 protein binding
GOTERM_CC_DIRECT	GO:0071682~endocytic vesicle lumen	4	0.55788	0.0221385	CTSL, HYOU1, CALR, HSP90B1	704	18	20562	6.49053	1	0.112395	0.0948549		GO:0071682	0.0221385	endocytic vesicle lumen
GOTERM_CC_DIRECT	GO:0043034~costamere	4	0.55788	0.0221385	KRT19, KRT8, FLNC, PLEC	704	18	20562	6.49053	1	0.112395	0.0948549		GO:0043034	0.0221385	costamere
GOTERM_MF_DIRECT	GO:0016740~transferase activity	13	1.81311	0.0234479	FTO, FDPS, GSTM1, UBE2E3, RPN1, ALG5, GLRX, DDOST, SRM, GARS1, SPTLC1, UBA2, UMPS	695	170	18869	2.07615	1	0.263789	0.24898		GO:0016740	0.0234479	transferase activity
GOTERM_MF_DIRECT	GO:0020037~heme binding	12	1.67364	0.0238844	HEBP1, GUCY1A1, GUCY1B1, AMBP, TBXAS1, CYP51A1, CYP20A1, PXDN, CYBB, EPX, CYP7B1, CYGB	695	151	18869	2.15759	1	0.264789	0.249924		GO:0020037	0.0238844	heme binding
GOTERM_BP_DIRECT	GO:1902416~positive regulation of mRNA binding	3	0.41841	0.02396	EIF3E, EIF3C, EIF3D	694	7	19308	11.9234	1	0.496637	0.487228		GO:1902416	0.02396	positive regulation of mRNA binding
GOTERM_BP_DIRECT	GO:1902255~positive regulation of intrinsic apoptotic signaling pathway by p53 class mediator	3	0.41841	0.02396	EIF5A, RPS7, RPL11	694	7	19308	11.9234	1	0.496637	0.487228		GO:1902255	0.02396	positive regulation of intrinsic apoptotic signaling pathway by p53 class mediator
GOTERM_BP_DIRECT	GO:0072378~blood coagulation, fibrin clot formation	3	0.41841	0.02396	FN1, F13A1, FBLN1	694	7	19308	11.9234	1	0.496637	0.487228		GO:0072378	0.02396	blood coagulation, fibrin clot formation
GOTERM_BP_DIRECT	GO:0010941~regulation of cell death	3	0.41841	0.02396	EEF1D, YWHAZ, SLC25A24	694	7	19308	11.9234	1	0.496637	0.487228		GO:0010941	0.02396	regulation of cell death
GOTERM_BP_DIRECT	GO:0034316~negative regulation of Arp2/3 complex-mediated actin nucleation	3	0.41841	0.02396	GMFG, HIP1R, CORO1B	694	7	19308	11.9234	1	0.496637	0.487228		GO:0034316	0.02396	negative regulation of Arp2/3 complex-mediated actin nucleation
GOTERM_BP_DIRECT	GO:0048741~skeletal muscle fiber development	5	0.69735	0.0239929	RIPOR2, PPP3CA, PPP3CB, KEL, PLEC	694	31	19308	4.48731	1	0.496637	0.487228		GO:0048741	0.0239929	skeletal muscle fiber development
GOTERM_BP_DIRECT	GO:0006486~protein glycosylation	11	1.53417	0.0248405	GMPPB, B4GALT1, DAD1, RPN1, ALG5, ALG2, STT3A, TRIP11, POGLUT3, UGGT1, DDOST	694	136	19308	2.25025	1	0.510843	0.501165		GO:0006486	0.0248405	protein glycosylation
GOTERM_MF_DIRECT	GO:0005047~signal recognition particle binding	3	0.41841	0.0250853	SRP72, SRPRA, SRP68	695	7	18869	11.6356	1	0.264789	0.249924		GO:0005047	0.0250853	signal recognition particle binding
GOTERM_MF_DIRECT	GO:0003747~translation release factor activity	3	0.41841	0.0250853	ETF1, GSPT2, GSPT1	695	7	18869	11.6356	1	0.264789	0.249924		GO:0003747	0.0250853	translation release factor activity
GOTERM_MF_DIRECT	GO:0008312~7S RNA binding	3	0.41841	0.0250853	SRP72, SRP54, SRP68	695	7	18869	11.6356	1	0.264789	0.249924		GO:0008312	0.0250853	7S RNA binding
GOTERM_MF_DIRECT	GO:0008641~small protein activating enzyme activity	3	0.41841	0.0250853	UBA5, UBA2, UBA1	695	7	18869	11.6356	1	0.264789	0.249924		GO:0008641	0.0250853	small protein activating enzyme activity
GOTERM_BP_DIRECT	GO:0071902~positive regulation of protein serine/threonine kinase activity	7	0.97629	0.0251822	CSF1R, MAP2K1, DDX3X, CAMK1, IQGAP1, STK4, IRGM	694	63	19308	3.09126	1	0.514529	0.504781		GO:0071902	0.0251822	positive regulation of protein serine/threonine kinase activity
GOTERM_CC_DIRECT	GO:0030496~midbody	13	1.81311	0.02555	SH3GLB1, HSPA5, ANXA2, SEPTIN2, RCC2, IQGAP1, SEPTIN7, HSP90B1, RACK1, TTLL12, PKN1, MYH10, RAB8A	704	185	20562	2.05241	1	0.128725	0.108636		GO:0030496	0.02555	midbody
GOTERM_BP_DIRECT	GO:0019882~antigen processing and presentation	6	0.83682	0.0260098	CTSL, RAB27A, RAB6A, CTSS, PSMB8, RAB8B	694	47	19308	3.55166	1	0.528032	0.518028		GO:0019882	0.0260098	antigen processing and presentation
GOTERM_CC_DIRECT	GO:0036464~cytoplasmic ribonucleoprotein granule	8	1.11576	0.0262868	ROCK2, CMA1, NCL, RPLP0, PABPC1, IQGAP1, EIF4E, CKAP4	704	85	20562	2.74893	1	0.131434	0.110922		GO:0036464	0.0262868	cytoplasmic ribonucleoprotein granule
GOTERM_BP_DIRECT	GO:0007017~microtubule-based process	5	0.69735	0.0266647	TUBA1C, TUBB2B, TUBB6, TUBB2A, TUBB3	694	32	19308	4.34708	1	0.534476	0.52435		GO:0007017	0.0266647	microtubule-based process
GOTERM_BP_DIRECT	GO:0006402~mRNA catabolic process	5	0.69735	0.0266647	RNH1, SND1, HSPA1B, HSPA1A, LSM2	694	32	19308	4.34708	1	0.534476	0.52435		GO:0006402	0.0266647	mRNA catabolic process
GOTERM_BP_DIRECT	GO:0002931~response to ischemia	7	0.97629	0.0269749	CSF1R, ROCK2, PTK2B, HYOU1, EEF2, HK2, MAP3K5	694	64	19308	3.04296	1	0.537293	0.527114		GO:0002931	0.0269749	response to ischemia
GOTERM_CC_DIRECT	GO:0061202~clathrin-sculpted gamma-aminobutyric acid transport vesicle membrane	3	0.41841	0.0285014	HSPA8, RAB3A, GAD1	704	8	20562	10.9528	1	0.14038	0.118472		GO:0061202	0.0285014	clathrin-sculpted gamma-aminobutyric acid transport vesicle membrane
GOTERM_CC_DIRECT	GO:0005577~fibrinogen complex	3	0.41841	0.0285014	FGL1, SERPINF2, FN1	704	8	20562	10.9528	1	0.14038	0.118472		GO:0005577	0.0285014	fibrinogen complex
GOTERM_BP_DIRECT	GO:0008380~RNA splicing	14	1.95258	0.0287122	HSPA8, RBFOX2, FUS, U2AF1, LGALS3, SYNCRIP, PTBP1, PUF60, U2AF2, MAGOH, SNRPG, HNRNPC, HNRNPA1, SRSF11	694	200	19308	1.94749	1	0.568159	0.557395		GO:0008380	0.0287122	RNA splicing
GOTERM_CC_DIRECT	GO:0005796~Golgi lumen	9	1.25523	0.0289434	ERO1A, LUM, OGN, BGN, CSPG4, PRELP, ZG16, DCN, RAB33B	704	106	20562	2.47987	1	0.141501	0.119418		GO:0005796	0.0289434	Golgi lumen
GOTERM_BP_DIRECT	GO:0061136~regulation of proteasomal protein catabolic process	4	0.55788	0.0290628	USP14, PSME1, PSME2, UCHL5	694	19	19308	5.85712	1	0.568159	0.557395		GO:0061136	0.0290628	regulation of proteasomal protein catabolic process
GOTERM_BP_DIRECT	GO:0030220~platelet formation	4	0.55788	0.0290628	WDR1, ACTN1, MYH9, PTPN6	694	19	19308	5.85712	1	0.568159	0.557395		GO:0030220	0.0290628	platelet formation
GOTERM_BP_DIRECT	GO:0017148~negative regulation of translation	8	1.11576	0.0294644	SYNCRIP, DDX3X, NCL, EIF4A3, RPS3, RACK1, CALR, EIF4E	694	83	19308	2.68157	1	0.572477	0.561631		GO:0017148	0.0294644	negative regulation of translation
GOTERM_MF_DIRECT	GO:0008201~heparin binding	13	1.81311	0.0296554	POSTN, SERPIND1, PRG2, FN1, PRELP, CLEC3B, EFEMP2, PTPRC, COL5A1, GPNMB, COL5A3, ANGPTL3, FBN1	695	176	18869	2.00537	1	0.309212	0.291853		GO:0008201	0.0296554	heparin binding
GOTERM_CC_DIRECT	GO:0000421~autophagosome membrane	6	0.83682	0.0296682	VMP1, SH3GLB1, MAP1LC3B, MAP1LC3A, RPN2, IRGM	704	51	20562	3.43616	1	0.143715	0.121287		GO:0000421	0.0296682	autophagosome membrane
GOTERM_CC_DIRECT	GO:0043197~dendritic spine	12	1.67364	0.0298318	ARF4, PPP3CA, LAMA2, MAP1B, ACTN1, NEDD4, CANX, HIP1R, PTK2B, PDLIM4, SEPTIN11, RAB8A	704	168	20562	2.08624	1	0.143715	0.121287		GO:0043197	0.0298318	dendritic spine
GOTERM_BP_DIRECT	GO:0046777~protein autophosphorylation	13	1.81311	0.030434	LYN, CSF1R, CAMK2D, STK4, EIF2S1, STK10, PAK1, SLK, PTPRC, TRIM28, PTK2B, CSK, PAK2	694	181	19308	1.99822	1	0.574404	0.563522		GO:0046777	0.030434	protein autophosphorylation
GOTERM_BP_DIRECT	GO:0050673~epithelial cell proliferation	6	0.83682	0.0305168	B4GALT1, COL8A1, BAK1, STK4, CYP7B1, RBPJ	694	49	19308	3.40669	1	0.574404	0.563522		GO:0050673	0.0305168	epithelial cell proliferation
GOTERM_BP_DIRECT	GO:0072659~protein localization to plasma membrane	12	1.67364	0.030852	SEC23A, RAB3A, ANXA2, ROCK2, RAB3D, RAB13, ARL6IP5, FLNA, TMED2, RAB8A, RAB8B, S100A10	694	161	19308	2.07364	1	0.574404	0.563522		GO:0072659	0.030852	protein localization to plasma membrane
GOTERM_BP_DIRECT	GO:0032880~regulation of protein localization	8	1.11576	0.0311882	FKBP1A, UFL1, PARP1, ARHGDIA, TPR, RACK1, TRIM25, CAMK1	694	84	19308	2.64965	1	0.574404	0.563522		GO:0032880	0.0311882	regulation of protein localization
GOTERM_BP_DIRECT	GO:0010756~positive regulation of plasminogen activation	3	0.41841	0.0311959	CLEC3B, ANXA2, S100A10	694	8	19308	10.433	1	0.574404	0.563522		GO:0010756	0.0311959	positive regulation of plasminogen activation
GOTERM_BP_DIRECT	GO:0060740~prostate gland epithelium morphogenesis	3	0.41841	0.0311959	MMP2, TNC, CYP7B1	694	8	19308	10.433	1	0.574404	0.563522		GO:0060740	0.0311959	prostate gland epithelium morphogenesis
GOTERM_BP_DIRECT	GO:0006517~protein deglycosylation	3	0.41841	0.0311959	MAN2B1, AGA, ENGASE	694	8	19308	10.433	1	0.574404	0.563522		GO:0006517	0.0311959	protein deglycosylation
GOTERM_BP_DIRECT	GO:0090063~positive regulation of microtubule nucleation	3	0.41841	0.0311959	PAK1, HSPA1B, HSPA1A	694	8	19308	10.433	1	0.574404	0.563522		GO:0090063	0.0311959	positive regulation of microtubule nucleation
GOTERM_BP_DIRECT	GO:0017185~peptidyl-lysine hydroxylation	3	0.41841	0.0311959	FKBP10, PLOD2, PLOD1	694	8	19308	10.433	1	0.574404	0.563522		GO:0017185	0.0311959	peptidyl-lysine hydroxylation
GOTERM_CC_DIRECT	GO:0031410~cytoplasmic vesicle	19	2.64993	0.0312689	SH3GLB1, USP14, CPB1, PDCD6, ANXA4, MYOF, CTSZ, ARAP1, ELAVL1, MAP1LC3B, GPNMB, ARHGDIB, RAB13, RAC2, PDE6D, GBP2, RAB6A, COPE, RAB8A	704	325	20562	1.70751	1	0.149547	0.126209		GO:0031410	0.0312689	cytoplasmic vesicle
GOTERM_MF_DIRECT	GO:0003676~nucleic acid binding	21	2.92887	0.0315895	EIF4A2, EIF4A1, AARS1, DDX3X, DDX46, KARS1, CNBP, EIF4A3, PA2G4, YBX3, RNASE1, SND1, DARS1, PTBP1, CARHSP1, DDX39A, NARS1, IMPDH1, HNRNPF, PABPC1, HNRNPA1	695	346	18869	1.64781	1	0.320792	0.302783		GO:0003676	0.0315895	nucleic acid binding
GOTERM_MF_DIRECT	GO:0030971~receptor tyrosine kinase binding	7	0.97629	0.0319726	DOCK4, PCNA, ITGAX, RACK1, CPNE3, EIF3A, YWHAG	695	65	18869	2.92381	1	0.320792	0.302783		GO:0030971	0.0319726	receptor tyrosine kinase binding
GOTERM_BP_DIRECT	GO:0045648~positive regulation of erythrocyte differentiation	5	0.69735	0.0325229	STAT1, STAT3, NCKAP1L, HSPA1B, HSPA1A	694	34	19308	4.09137	1	0.588572	0.577421		GO:0045648	0.0325229	positive regulation of erythrocyte differentiation
GOTERM_BP_DIRECT	GO:0008015~blood circulation	5	0.69735	0.0325229	GUCY1A1, GUCY1B1, STAT1, MYOF, SERPING1	694	34	19308	4.09137	1	0.588572	0.577421		GO:0008015	0.0325229	blood circulation
GOTERM_BP_DIRECT	GO:0010498~proteasomal protein catabolic process	5	0.69735	0.0325229	PSMA5, PRPF19, PSMB8, PSMB10, PSMB9	694	34	19308	4.09137	1	0.588572	0.577421		GO:0010498	0.0325229	proteasomal protein catabolic process
GOTERM_MF_DIRECT	GO:0015036~disulfide oxidoreductase activity	3	0.41841	0.032642	ERO1A, PDIA3, TXNL1	695	8	18869	10.1811	1	0.320792	0.302783		GO:0015036	0.032642	disulfide oxidoreductase activity
GOTERM_MF_DIRECT	GO:0031730~CCR5 chemokine receptor binding	3	0.41841	0.032642	STAT1, STAT3, JAK1	695	8	18869	10.1811	1	0.320792	0.302783		GO:0031730	0.032642	CCR5 chemokine receptor binding
GOTERM_MF_DIRECT	GO:0050072~m7G(5')pppN diphosphatase activity	3	0.41841	0.032642	DCPS, NUDT3, NUDT4	695	8	18869	10.1811	1	0.320792	0.302783		GO:0050072	0.032642	m7G(5')pppN diphosphatase activity
GOTERM_CC_DIRECT	GO:0005911~cell-cell junction	13	1.81311	0.032741	WDR1, SH3KBP1, ACTN1, KRT8, CORO1A, PAK1, DES, FSCN1, FLNA, CSK, DSG2, PTPN6, PAK2	704	192	20562	1.97758	1	0.155461	0.1312		GO:0005911	0.032741	cell-cell junction
GOTERM_BP_DIRECT	GO:0007041~lysosomal transport	4	0.55788	0.0333025	LRP1, NEDD4, ARSB, HSPA1A	694	20	19308	5.56427	1	0.59587	0.584581		GO:0007041	0.0333025	lysosomal transport
GOTERM_BP_DIRECT	GO:0006405~RNA export from nucleus	4	0.55788	0.0333025	DDX39A, NUP62, TPR, HNRNPA1	694	20	19308	5.56427	1	0.59587	0.584581		GO:0006405	0.0333025	RNA export from nucleus
GOTERM_CC_DIRECT	GO:0032982~myosin filament	4	0.55788	0.0334643	MYO18A, MYH9, MYH11, MYH10	704	21	20562	5.56331	1	0.156641	0.132196		GO:0032982	0.0334643	myosin filament
GOTERM_CC_DIRECT	GO:0005839~proteasome core complex	4	0.55788	0.0334643	PSMA5, PSMB8, PSMB10, PSMB9	704	21	20562	5.56331	1	0.156641	0.132196		GO:0005839	0.0334643	proteasome core complex
GOTERM_MF_DIRECT	GO:0008233~peptidase activity	9	1.25523	0.0343531	SPCS3, SPCS2, SPCS1, AGA, CTSE, CTSD, SEC11A, LGMN, ZMPSTE24	695	102	18869	2.39556	1	0.333771	0.315033		GO:0008233	0.0343531	peptidase activity
GOTERM_BP_DIRECT	GO:0042110~T cell activation	6	0.83682	0.0354857	FKBP1A, PPP3CA, PPP3CB, PTPRC, CD44, DDOST	694	51	19308	3.2731	1	0.631366	0.619405		GO:0042110	0.0354857	T cell activation
GOTERM_BP_DIRECT	GO:0006904~vesicle docking involved in exocytosis	5	0.69735	0.0357118	RAB3A, RAB3D, RAB13, RAB8A, RAB8B	694	35	19308	3.97448	1	0.63184	0.619869		GO:0006904	0.0357118	vesicle docking involved in exocytosis
GOTERM_CC_DIRECT	GO:0031258~lamellipodium membrane	4	0.55788	0.0377907	VASP, CFL1, CSPG4, CD44	704	22	20562	5.31043	1	0.174418	0.147199		GO:0031258	0.0377907	lamellipodium membrane
GOTERM_CC_DIRECT	GO:0030863~cortical cytoskeleton	4	0.55788	0.0377907	TPM4, MYH9, FLNA, DBN1	704	22	20562	5.31043	1	0.174418	0.147199		GO:0030863	0.0377907	cortical cytoskeleton
GOTERM_BP_DIRECT	GO:0045104~intermediate filament cytoskeleton organization	4	0.55788	0.0378448	MACF1, KRT18, PLEC, PRPH	694	21	19308	5.2993	1	0.665859	0.653244		GO:0045104	0.0378448	intermediate filament cytoskeleton organization
GOTERM_BP_DIRECT	GO:0030968~endoplasmic reticulum unfolded protein response	6	0.83682	0.0381463	ERO1A, ERLEC1, TBL2, HSPA5, CANX, CALR	694	52	19308	3.21015	1	0.667455	0.65481		GO:0030968	0.0381463	endoplasmic reticulum unfolded protein response
GOTERM_MF_DIRECT	GO:0019901~protein kinase binding	28	3.90516	0.0385188	CTBP2, MVP, ITGB2, IQGAP1, ELAVL1, UFL1, PAK1, ARHGDIA, DPYSL2, RPS3, RAC2, PAK2, GCN1, RAB8A, MAP3K5, PARP1, RPS7, RCC2, STAT3, EEF2, IRGM, YWHAZ, DNAJC3, PTPRC, TBL2, CDC37, PTPN6, CSPG4	695	511	18869	1.48765	1	0.366541	0.345964		GO:0019901	0.0385188	protein kinase binding
GOTERM_MF_DIRECT	GO:0005506~iron ion binding	11	1.53417	0.0385833	FTH1, TBXAS1, CYP51A1, CYP20A1, PLOD2, PLOD1, CALR, ABCE1, CYP7B1, XDH, CYGB	695	143	18869	2.08843	1	0.366541	0.345964		GO:0005506	0.0385833	iron ion binding
GOTERM_BP_DIRECT	GO:0033146~regulation of intracellular estrogen receptor signaling pathway	3	0.41841	0.0391695	UFL1, DDRGK1, UBA5	694	9	19308	9.27378	1	0.67054	0.657837		GO:0033146	0.0391695	regulation of intracellular estrogen receptor signaling pathway
GOTERM_BP_DIRECT	GO:1900152~negative regulation of nuclear-transcribed mRNA catabolic process, deadenylation-dependent decay	3	0.41841	0.0391695	SYNCRIP, HNRNPD, PABPC1	694	9	19308	9.27378	1	0.67054	0.657837		GO:1900152	0.0391695	negative regulation of nuclear-transcribed mRNA catabolic process, deadenylation-dependent decay
GOTERM_BP_DIRECT	GO:0030011~maintenance of cell polarity	3	0.41841	0.0391695	PDLIM1, NCKAP1L, ARPC5	694	9	19308	9.27378	1	0.67054	0.657837		GO:0030011	0.0391695	maintenance of cell polarity
GOTERM_BP_DIRECT	GO:0051220~cytoplasmic sequestering of protein	3	0.41841	0.0391695	YWHAB, FLNA, DBN1	694	9	19308	9.27378	1	0.67054	0.657837		GO:0051220	0.0391695	cytoplasmic sequestering of protein
GOTERM_CC_DIRECT	GO:0005643~nuclear pore	8	1.11576	0.0401121	EIF5A, MVP, NUP62, TPR, IPO7, NUP58, KPNB1, IPO5	704	93	20562	2.51246	1	0.183847	0.155156		GO:0005643	0.0401121	nuclear pore
GOTERM_BP_DIRECT	GO:2000045~regulation of G1/S transition of mitotic cell cycle	6	0.83682	0.0409257	SMARCB1, BCL7C, ACTL6A, PSME1, PSME2, PTPN6	694	53	19308	3.14958	1	0.693111	0.67998		GO:2000045	0.0409257	regulation of G1/S transition of mitotic cell cycle
GOTERM_BP_DIRECT	GO:0042542~response to hydrogen peroxide	6	0.83682	0.0409257	STAT1, MMP2, CAPN2, PTK2B, BAK1, EEF2	694	53	19308	3.14958	1	0.693111	0.67998		GO:0042542	0.0409257	response to hydrogen peroxide
GOTERM_MF_DIRECT	GO:1990948~ubiquitin ligase inhibitor activity	3	0.41841	0.0409614	RPS7, RPL11, RPS20	695	9	18869	9.04988	1	0.380674	0.359302		GO:1990948	0.0409614	ubiquitin ligase inhibitor activity
GOTERM_MF_DIRECT	GO:0030023~extracellular matrix constituent conferring elasticity	3	0.41841	0.0409614	EMILIN1, FBLN5, FBN1	695	9	18869	9.04988	1	0.380674	0.359302		GO:0030023	0.0409614	extracellular matrix constituent conferring elasticity
GOTERM_BP_DIRECT	GO:0030334~regulation of cell migration	9	1.25523	0.0424902	MACF1, SLK, LAMA2, RCC2, LMNA, DPYSL3, TNC, FLNA, CYRIB	694	109	19308	2.29717	1	0.710288	0.696831		GO:0030334	0.0424902	regulation of cell migration
GOTERM_BP_DIRECT	GO:0032869~cellular response to insulin stimulus	9	1.25523	0.0424902	PAK1, PARP1, STAT1, RAB13, MARS1, SORBS1, RAB8A, YWHAG, RAB8B	694	109	19308	2.29717	1	0.710288	0.696831		GO:0032869	0.0424902	cellular response to insulin stimulus
GOTERM_BP_DIRECT	GO:0006695~cholesterol biosynthetic process	5	0.69735	0.0426128	FDPS, NSDHL, HMGCS1, CYP51A1, APOA4	694	37	19308	3.75964	1	0.710288	0.696831		GO:0006695	0.0426128	cholesterol biosynthetic process
GOTERM_CC_DIRECT	GO:0030137~COPI-coated vesicle	3	0.41841	0.0437855	TMED10, TMED2, SEC22B	704	10	20562	8.76222	1	0.1993	0.168197		GO:0030137	0.0437855	COPI-coated vesicle
GOTERM_BP_DIRECT	GO:0090398~cellular senescence	6	0.83682	0.0438246	MAP2K1, LMNA, NUP62, PRELP, CALR, MAP3K5	694	54	19308	3.09126	1	0.722877	0.709182		GO:0090398	0.0438246	cellular senescence
GOTERM_BP_DIRECT	GO:0043280~positive regulation of cysteine-type endopeptidase activity involved in apoptotic process	6	0.83682	0.0438246	DDX3X, PDCD6, CASP1, ARL6IP5, CTSD, MAP3K5	694	54	19308	3.09126	1	0.722877	0.709182		GO:0043280	0.0438246	positive regulation of cysteine-type endopeptidase activity involved in apoptotic process
GOTERM_BP_DIRECT	GO:0034599~cellular response to oxidative stress	8	1.11576	0.0451575	RWDD1, PARP1, GPX7, PYCR2, EIF2S1, HSPA1B, SLC25A24, HSPA1A	694	91	19308	2.44583	1	0.741004	0.726965		GO:0034599	0.0451575	cellular response to oxidative stress
GOTERM_MF_DIRECT	GO:0004683~calmodulin-dependent protein kinase activity	4	0.55788	0.045363	CAMK2D, PTK2B, CAMK1, CAMK2G	695	22	18869	4.9363	1	0.417047	0.393634		GO:0004683	0.045363	calmodulin-dependent protein kinase activity
GOTERM_MF_DIRECT	GO:0004601~peroxidase activity	5	0.69735	0.0459231	PRDX4, PXDN, GPX7, EPX, CYGB	695	37	18869	3.66887	1	0.417705	0.394255		GO:0004601	0.0459231	peroxidase activity
GOTERM_BP_DIRECT	GO:0071407~cellular response to organic cyclic compound	6	0.83682	0.0468435	LGALS1, STAT1, ARHGDIA, STAT3, ARL6IP5, PAK2	694	55	19308	3.03505	1	0.753964	0.73968		GO:0071407	0.0468435	cellular response to organic cyclic compound
GOTERM_BP_DIRECT	GO:0032964~collagen biosynthetic process	3	0.41841	0.0478187	RCN3, COL5A1, SERPINH1	694	10	19308	8.3464	1	0.753964	0.73968		GO:0032964	0.0478187	collagen biosynthetic process
GOTERM_BP_DIRECT	GO:1901838~positive regulation of transcription of nuclear large rRNA transcript from RNA polymerase I promoter	3	0.41841	0.0478187	SMARCB1, NCL, MARS1	694	10	19308	8.3464	1	0.753964	0.73968		GO:1901838	0.0478187	positive regulation of transcription of nuclear large rRNA transcript from RNA polymerase I promoter
GOTERM_BP_DIRECT	GO:0016070~RNA metabolic process	3	0.41841	0.0478187	LSM8, RBFOX2, TSN	694	10	19308	8.3464	1	0.753964	0.73968		GO:0016070	0.0478187	RNA metabolic process
GOTERM_BP_DIRECT	GO:0051901~positive regulation of mitochondrial depolarization	3	0.41841	0.0478187	PARP1, RACK1, DCN	694	10	19308	8.3464	1	0.753964	0.73968		GO:0051901	0.0478187	positive regulation of mitochondrial depolarization
GOTERM_BP_DIRECT	GO:0006259~DNA metabolic process	4	0.55788	0.0478201	MAP1S, MYO18A, PLD4, PLD3	694	23	19308	4.83849	1	0.753964	0.73968		GO:0006259	0.0478201	DNA metabolic process
GOTERM_BP_DIRECT	GO:0010499~proteasomal ubiquitin-independent protein catabolic process	4	0.55788	0.0478201	PSMA5, PSMB8, PSMB10, PSMB9	694	23	19308	4.83849	1	0.753964	0.73968		GO:0010499	0.0478201	proteasomal ubiquitin-independent protein catabolic process
GOTERM_BP_DIRECT	GO:0006338~chromatin remodeling	12	1.67364	0.0478518	PAK1, HDAC2, SMARCB1, CBX3, RUVBL2, BCL7C, ACTL6A, RBBP7, HNRNPC, NPM3, NUDT5, UCHL5	694	173	19308	1.9298	1	0.753964	0.73968		GO:0006338	0.0478518	chromatin remodeling
GOTERM_BP_DIRECT	GO:0070301~cellular response to hydrogen peroxide	7	0.97629	0.0496162	HDAC2, PCNA, MAP1LC3A, ANXA1, RPS3, STAT6, MAP3K5	694	74	19308	2.63175	1	0.777894	0.763156		GO:0070301	0.0496162	cellular response to hydrogen peroxide
GOTERM_MF_DIRECT	GO:0043531~ADP binding	5	0.69735	0.0498909	RUVBL2, MYO18A, MYH9, TAP1, MYH10	695	38	18869	3.57232	1	0.440521	0.41579		GO:0043531	0.0498909	ADP binding
GOTERM_MF_DIRECT	GO:0008239~dipeptidyl-peptidase activity	3	0.41841	0.0499773	DPP7, CTSC, DPP3	695	10	18869	8.14489	1	0.440521	0.41579		GO:0008239	0.0499773	dipeptidyl-peptidase activity
GOTERM_MF_DIRECT	GO:0032036~myosin heavy chain binding	3	0.41841	0.0499773	MYL9, CORO1A, MYL12B	695	10	18869	8.14489	1	0.440521	0.41579		GO:0032036	0.0499773	myosin heavy chain binding
GOTERM_BP_DIRECT	GO:0043434~response to peptide hormone	6	0.83682	0.0499828	EIF2B3, ANXA1, STAT1, STAT3, STAT6, REG3G	694	56	19308	2.98086	1	0.779508	0.76474		GO:0043434	0.0499828	response to peptide hormone
GOTERM_BP_DIRECT	GO:1905168~positive regulation of double-strand break repair via homologous recombination	5	0.69735	0.0502114	ACTR2, PARP1, FUS, RUVBL2, ACTL6A	694	39	19308	3.56684	1	0.779508	0.76474		GO:1905168	0.0502114	positive regulation of double-strand break repair via homologous recombination
GOTERM_CC_DIRECT	GO:0042995~cell projection	12	1.67364	0.0502128	VASP, MACF1, WDR1, ARPC2, MAP1S, ACTN1, C1QTNF5, SPP1, RAC2, IRGM, CD44, FERMT3	704	183	20562	1.91524	1	0.22699	0.191565		GO:0042995	0.0502128	cell projection
GOTERM_BP_DIRECT	GO:0009410~response to xenobiotic stimulus	15	2.09205	0.0517102	LYN, HDAC2, RPN2, STAT1, MMP2, CYBB, SRP68, ENO2, DAD1, MAP1B, PTK2B, NCKAP1L, BAK1, CALR, PMS1	694	240	19308	1.73883	1	0.798859	0.783725		GO:0009410	0.0517102	response to xenobiotic stimulus
GOTERM_BP_DIRECT	GO:0030855~epithelial cell differentiation	8	1.11576	0.0522018	LGALS3, KRT19, PCNA, CASP6, ANXA4, KRT12, ANXA7, TAGLN2	694	94	19308	2.36777	1	0.80254	0.787335		GO:0030855	0.0522018	epithelial cell differentiation
GOTERM_CC_DIRECT	GO:0032432~actin filament bundle	3	0.41841	0.0523276	MARCKS, FLNA, LCP1	704	11	20562	7.96565	1	0.230242	0.19431		GO:0032432	0.0523276	actin filament bundle
GOTERM_CC_DIRECT	GO:0044754~autolysosome	3	0.41841	0.0523276	MAP1LC3A, FTH1, LAMP2	704	11	20562	7.96565	1	0.230242	0.19431		GO:0044754	0.0523276	autolysosome
GOTERM_CC_DIRECT	GO:0019774~proteasome core complex, beta-subunit complex	3	0.41841	0.0523276	PSMB8, PSMB10, PSMB9	704	11	20562	7.96565	1	0.230242	0.19431		GO:0019774	0.0523276	proteasome core complex, beta-subunit complex
GOTERM_CC_DIRECT	GO:0005652~nuclear lamina	3	0.41841	0.0523276	PCNA, LMNA, LMNB1	704	11	20562	7.96565	1	0.230242	0.19431		GO:0005652	0.0523276	nuclear lamina
GOTERM_MF_DIRECT	GO:0017124~SH3 domain binding	10	1.3947	0.0527863	VASP, LYN, SH3BGRL, DOCK4, AFAP1L2, NCF1, SH3KBP1, DPYSL3, HIP1R, PTPN6	695	131	18869	2.07249	1	0.460533	0.434679		GO:0017124	0.0527863	SH3 domain binding
GOTERM_BP_DIRECT	GO:1901673~regulation of mitotic spindle assembly	4	0.55788	0.0532423	RIPOR2, TPR, HSPA1B, HSPA1A	694	24	19308	4.63689	1	0.810665	0.795307		GO:1901673	0.0532423	regulation of mitotic spindle assembly
GOTERM_BP_DIRECT	GO:0048025~negative regulation of mRNA splicing, via spliceosome	4	0.55788	0.0532423	PTBP1, U2AF2, HNRNPA2B1, SRSF10	694	24	19308	4.63689	1	0.810665	0.795307		GO:0048025	0.0532423	negative regulation of mRNA splicing, via spliceosome
GOTERM_CC_DIRECT	GO:0022625~cytosolic large ribosomal subunit	6	0.83682	0.0539218	RPL12, RPL11, RPLP0, RPLP2, RPL10A, RPL9	704	60	20562	2.92074	1	0.235685	0.198904		GO:0022625	0.0539218	cytosolic large ribosomal subunit
GOTERM_MF_DIRECT	GO:0003824~catalytic activity	10	1.3947	0.0548944	PARP3, SPTLC1, IMPDH1, GAA, IMPDH2, PLD4, MAN2B1, UPP1, NANS, PLD3	695	132	18869	2.05679	1	0.474088	0.447472		GO:0003824	0.0548944	catalytic activity
GOTERM_BP_DIRECT	GO:0032446~protein modification by small protein conjugation	3	0.41841	0.0570847	UBA5, UBA2, UBA1	694	11	19308	7.58763	1	0.848766	0.832686		GO:0032446	0.0570847	protein modification by small protein conjugation
GOTERM_BP_DIRECT	GO:0006002~fructose 6-phosphate metabolic process	3	0.41841	0.0570847	HK3, FBP2, HK2	694	11	19308	7.58763	1	0.848766	0.832686		GO:0006002	0.0570847	fructose 6-phosphate metabolic process
GOTERM_BP_DIRECT	GO:1990266~neutrophil migration	3	0.41841	0.0570847	WDR1, ITGB2, GP2	694	11	19308	7.58763	1	0.848766	0.832686		GO:1990266	0.0570847	neutrophil migration
GOTERM_BP_DIRECT	GO:0018401~peptidyl-proline hydroxylation to 4-hydroxy-L-proline	3	0.41841	0.0570847	ERO1A, PRDX4, P4HB	694	11	19308	7.58763	1	0.848766	0.832686		GO:0018401	0.0570847	peptidyl-proline hydroxylation to 4-hydroxy-L-proline
GOTERM_BP_DIRECT	GO:0070934~CRD-mediated mRNA stabilization	3	0.41841	0.0570847	SYNCRIP, HNRNPD, PABPC1	694	11	19308	7.58763	1	0.848766	0.832686		GO:0070934	0.0570847	CRD-mediated mRNA stabilization
GOTERM_MF_DIRECT	GO:0003725~double-stranded RNA binding	7	0.97629	0.057637	EIF4A1, ACTN1, VIM, LRRFIP1, TUBB4B, ILF2, ELAVL1	695	75	18869	2.53397	1	0.492796	0.46513		GO:0003725	0.057637	double-stranded RNA binding
GOTERM_CC_DIRECT	GO:0001726~ruffle	8	1.11576	0.0579792	PAK1, ANXA2, ACTN1, FSCN1, MYH9, CSPG4, LCP1, IQGAP1	704	101	20562	2.31346	1	0.251752	0.212463		GO:0001726	0.0579792	ruffle
GOTERM_MF_DIRECT	GO:0016616~oxidoreductase activity, acting on the CH-OH group of donors, NAD or NADP as acceptor	5	0.69735	0.058372	NSDHL, CTBP2, RDH11, HSD17B13, HSD17B11	695	40	18869	3.39371	1	0.493986	0.466254		GO:0016616	0.058372	oxidoreductase activity, acting on the CH-OH group of donors, NAD or NADP as acceptor
GOTERM_BP_DIRECT	GO:0045184~establishment of protein localization	5	0.69735	0.058503	RIPOR2, RCC2, FLNA, KPNB1, CORO1C	694	41	19308	3.39284	1	0.860282	0.843984		GO:0045184	0.058503	establishment of protein localization
GOTERM_BP_DIRECT	GO:0030574~collagen catabolic process	5	0.69735	0.058503	MMP12, MRC2, CTSL, MMP2, CTSS	694	41	19308	3.39284	1	0.860282	0.843984		GO:0030574	0.058503	collagen catabolic process
GOTERM_MF_DIRECT	GO:0016491~oxidoreductase activity	15	2.09205	0.0589317	ERO1A, VAT1, AMBP, TECR, CYP51A1, CYBB, SELENOF, HSD17B11, PRDX4, RDH11, ALDH1A2, IMPDH2, AGPS, XDH, CBR3	695	239	18869	1.70395	1	0.493986	0.466254		GO:0016491	0.0589317	oxidoreductase activity
GOTERM_BP_DIRECT	GO:0051893~regulation of focal adhesion assembly	4	0.55788	0.0589458	MACF1, SLK, ROCK2, CORO1C	694	25	19308	4.45141	1	0.860282	0.843984		GO:0051893	0.0589458	regulation of focal adhesion assembly
GOTERM_BP_DIRECT	GO:0000244~spliceosomal tri-snRNP complex assembly	4	0.55788	0.0589458	CD2BP2, PRPF19, SRSF10, LSM2	694	25	19308	4.45141	1	0.860282	0.843984		GO:0000244	0.0589458	spliceosomal tri-snRNP complex assembly
GOTERM_MF_DIRECT	GO:0048407~platelet-derived growth factor binding	3	0.41841	0.0596273	COL3A1, COL5A1, COL6A1	695	11	18869	7.40445	1	0.494965	0.467177		GO:0048407	0.0596273	platelet-derived growth factor binding
GOTERM_BP_DIRECT	GO:0031532~actin cytoskeleton reorganization	6	0.83682	0.0601249	PAK1, ANXA1, MYH9, FLNA, PDLIM4, PLEC	694	59	19308	2.82929	1	0.869477	0.853005		GO:0031532	0.0601249	actin cytoskeleton reorganization
GOTERM_BP_DIRECT	GO:0034644~cellular response to UV	6	0.83682	0.0601249	PCNA, PARP1, RUVBL2, NEDD4, BAK1, EIF2S1	694	59	19308	2.82929	1	0.869477	0.853005		GO:0034644	0.0601249	cellular response to UV
GOTERM_MF_DIRECT	GO:0031625~ubiquitin protein ligase binding	18	2.51046	0.0605232	LYN, HSPA8, HSPA5, SH3KBP1, RPL11, PA2G4, YWHAZ, MAP1LC3B, MAP1LC3A, HERC2, TRIM28, BAG1, PTK2B, CKB, CALR, HSPA1B, JAK1, HSPA1A	695	306	18869	1.59704	1	0.49757	0.469637		GO:0031625	0.0605232	ubiquitin protein ligase binding
GOTERM_BP_DIRECT	GO:0006898~receptor-mediated endocytosis	7	0.97629	0.0611817	CAP1, ITGAM, LRP1, ITGB2, HIP1R, CD14, FCGR1A	694	78	19308	2.49679	1	0.880738	0.864052		GO:0006898	0.0611817	receptor-mediated endocytosis
GOTERM_CC_DIRECT	GO:0000974~Prp19 complex	3	0.41841	0.0614034	HSPA8, PRPF19, RBM22	704	12	20562	7.30185	1	0.26146	0.220656		GO:0000974	0.0614034	Prp19 complex
GOTERM_CC_DIRECT	GO:0005614~interstitial matrix	3	0.41841	0.0614034	COL14A1, TNC, VWA1	704	12	20562	7.30185	1	0.26146	0.220656		GO:0005614	0.0614034	interstitial matrix
GOTERM_CC_DIRECT	GO:0071006~U2-type catalytic step 1 spliceosome	3	0.41841	0.0614034	EIF4A3, PRPF19, RBM22	704	12	20562	7.30185	1	0.26146	0.220656		GO:0071006	0.0614034	U2-type catalytic step 1 spliceosome
GOTERM_BP_DIRECT	GO:0042098~T cell proliferation	5	0.69735	0.0629057	PPP3CB, PTPRC, PTPN6, CORO1A, PSMB10	694	42	19308	3.31206	1	0.901459	0.884381		GO:0042098	0.0629057	T cell proliferation
GOTERM_BP_DIRECT	GO:0030216~keratinocyte differentiation	6	0.83682	0.0637467	PPP3CA, MAP2K1, ASAH1, ANXA1, STK4, RBPJ	694	60	19308	2.78213	1	0.909395	0.892166		GO:0030216	0.0637467	keratinocyte differentiation
GOTERM_BP_DIRECT	GO:0006952~defense response	7	0.97629	0.0643023	TIAL1, STAT1, STAT3, CYBB, TAP1, STAT6, IRGM	694	79	19308	2.46518	1	0.909789	0.892553		GO:0006952	0.0643023	defense response
GOTERM_BP_DIRECT	GO:0001782~B cell homeostasis	4	0.55788	0.0649234	LYN, NCKAP1L, PKN1, BAK1	694	26	19308	4.2802	1	0.909789	0.892553		GO:0001782	0.0649234	B cell homeostasis
GOTERM_BP_DIRECT	GO:0051493~regulation of cytoskeleton organization	4	0.55788	0.0649234	DIAPH1, CAPN2, PAK2, S100A9	694	26	19308	4.2802	1	0.909789	0.892553		GO:0051493	0.0649234	regulation of cytoskeleton organization
GOTERM_BP_DIRECT	GO:0071353~cellular response to interleukin-4	4	0.55788	0.0649234	HSPA5, IMPDH2, RPLP0, CORO1A	694	26	19308	4.2802	1	0.909789	0.892553		GO:0071353	0.0649234	cellular response to interleukin-4
GOTERM_BP_DIRECT	GO:0070213~protein auto-ADP-ribosylation	3	0.41841	0.0669124	PARP3, PARP1, PARP12	694	12	19308	6.95533	1	0.914839	0.897507		GO:0070213	0.0669124	protein auto-ADP-ribosylation
GOTERM_BP_DIRECT	GO:1904507~positive regulation of telomere maintenance in response to DNA damage	3	0.41841	0.0669124	RUVBL2, ACTL6A, UCHL5	694	12	19308	6.95533	1	0.914839	0.897507		GO:1904507	0.0669124	positive regulation of telomere maintenance in response to DNA damage
GOTERM_BP_DIRECT	GO:0044794~positive regulation by host of viral process	3	0.41841	0.0669124	CSF1R, CFL1, PPIB	694	12	19308	6.95533	1	0.914839	0.897507		GO:0044794	0.0669124	positive regulation by host of viral process
GOTERM_BP_DIRECT	GO:0051639~actin filament network formation	3	0.41841	0.0669124	ACTN1, LCP1, ARPC5	694	12	19308	6.95533	1	0.914839	0.897507		GO:0051639	0.0669124	actin filament network formation
GOTERM_CC_DIRECT	GO:0017177~glucosidase II complex	2	0.27894	0.0672113	GANAB, PRKCSH	704	2	20562	29.2074	1	0.272144	0.229673		GO:0017177	0.0672113	glucosidase II complex
GOTERM_CC_DIRECT	GO:0034689~integrin alphaX-beta2 complex	2	0.27894	0.0672113	ITGB2, ITGAX	704	2	20562	29.2074	1	0.272144	0.229673		GO:0034689	0.0672113	integrin alphaX-beta2 complex
GOTERM_CC_DIRECT	GO:0098857~membrane microdomain	2	0.27894	0.0672113	PTPRC, LAMP2	704	2	20562	29.2074	1	0.272144	0.229673		GO:0098857	0.0672113	membrane microdomain
GOTERM_CC_DIRECT	GO:0043614~multi-eIF complex	2	0.27894	0.0672113	EIF2S1, EIF3A	704	2	20562	29.2074	1	0.272144	0.229673		GO:0043614	0.0672113	multi-eIF complex
GOTERM_CC_DIRECT	GO:0071540~eukaryotic translation initiation factor 3 complex, eIF3e	2	0.27894	0.0672113	EIF3E, EIF3A	704	2	20562	29.2074	1	0.272144	0.229673		GO:0071540	0.0672113	eukaryotic translation initiation factor 3 complex, eIF3e
GOTERM_CC_DIRECT	GO:1905379~beta-N-acetylhexosaminidase complex	2	0.27894	0.0672113	HEXB, HEXA	704	2	20562	29.2074	1	0.272144	0.229673		GO:1905379	0.0672113	beta-N-acetylhexosaminidase complex
GOTERM_CC_DIRECT	GO:1990665~AnxA2-p11 complex	2	0.27894	0.0672113	ANXA2, S100A10	704	2	20562	29.2074	1	0.272144	0.229673		GO:1990665	0.0672113	AnxA2-p11 complex
GOTERM_CC_DIRECT	GO:0034688~integrin alphaM-beta2 complex	2	0.27894	0.0672113	ITGAM, ITGB2	704	2	20562	29.2074	1	0.272144	0.229673		GO:0034688	0.0672113	integrin alphaM-beta2 complex
GOTERM_BP_DIRECT	GO:0051209~release of sequestered calcium ion into cytosol	5	0.69735	0.0674776	ERO1A, PTPRC, FLNA, ITPR2, ITPR3	694	43	19308	3.23504	1	0.914839	0.897507		GO:0051209	0.0674776	release of sequestered calcium ion into cytosol
GOTERM_CC_DIRECT	GO:0005819~spindle	10	1.3947	0.0679195	NUMA1, MAP1S, CBX3, SEPTIN2, CBX1, RPS3, MYH9, TTLL12, PRPF19, SEPTIN7	704	148	20562	1.97347	1	0.273335	0.230678		GO:0005819	0.0679195	spindle
GOTERM_MF_DIRECT	GO:0043236~laminin binding	4	0.55788	0.0688233	LGALS3, LGALS1, RPSA, CTSS	695	26	18869	4.17687	1	0.560419	0.528956		GO:0043236	0.0688233	laminin binding
GOTERM_CC_DIRECT	GO:0019897~extrinsic component of plasma membrane	4	0.55788	0.0692573	PPP3CA, ANXA2, NUMA1, S100A10	704	28	20562	4.17248	1	0.275795	0.232754		GO:0019897	0.0692573	extrinsic component of plasma membrane
GOTERM_CC_DIRECT	GO:0043025~neuronal cell body	21	2.92887	0.0693666	LRP1, NCF1, NUMA1, MAP1S, ANXA3, EIF4A3, HIP1R, CYBB, ITPR3, CYGB, TUBB3, MAP1B, DPYSL2, CANX, CAPN2, RACK1, PTK2B, FLNB, CKB, SRSF10, RAB8A	704	408	20562	1.50332	1	0.275795	0.232754		GO:0043025	0.0693666	neuronal cell body
GOTERM_MF_DIRECT	GO:0000339~RNA cap binding	3	0.41841	0.0698529	EIF4A1, EIF4G3, EIF4E	695	12	18869	6.78741	1	0.563436	0.531804		GO:0000339	0.0698529	RNA cap binding
GOTERM_BP_DIRECT	GO:0018125~peptidyl-cysteine methylation	2	0.27894	0.0704973	RAB3D, RAB6A	694	2	19308	27.8213	1	0.914839	0.897507		GO:0018125	0.0704973	peptidyl-cysteine methylation
GOTERM_BP_DIRECT	GO:0032796~uropod organization	2	0.27894	0.0704973	MYH9, CORO1A	694	2	19308	27.8213	1	0.914839	0.897507		GO:0032796	0.0704973	uropod organization
GOTERM_BP_DIRECT	GO:0002481~antigen processing and presentation of exogenous protein antigen via MHC class Ib, TAP-dependent	2	0.27894	0.0704973	TAP2, B2M	694	2	19308	27.8213	1	0.914839	0.897507		GO:0002481	0.0704973	antigen processing and presentation of exogenous protein antigen via MHC class Ib, TAP-dependent
GOTERM_BP_DIRECT	GO:0006147~guanine catabolic process	2	0.27894	0.0704973	GDA, XDH	694	2	19308	27.8213	1	0.914839	0.897507		GO:0006147	0.0704973	guanine catabolic process
GOTERM_BP_DIRECT	GO:0023057~negative regulation of signaling	2	0.27894	0.0704973	PPP3CA, PPP3CB	694	2	19308	27.8213	1	0.914839	0.897507		GO:0023057	0.0704973	negative regulation of signaling
GOTERM_BP_DIRECT	GO:0030328~prenylcysteine catabolic process	2	0.27894	0.0704973	PCYOX1L, PCYOX1	694	2	19308	27.8213	1	0.914839	0.897507		GO:0030328	0.0704973	prenylcysteine catabolic process
GOTERM_BP_DIRECT	GO:1902170~cellular response to reactive nitrogen species	2	0.27894	0.0704973	STAT6, MAP3K5	694	2	19308	27.8213	1	0.914839	0.897507		GO:1902170	0.0704973	cellular response to reactive nitrogen species
GOTERM_BP_DIRECT	GO:1905663~positive regulation of telomerase RNA reverse transcriptase activity	2	0.27894	0.0704973	HNRNPA2B1, HNRNPD	694	2	19308	27.8213	1	0.914839	0.897507		GO:1905663	0.0704973	positive regulation of telomerase RNA reverse transcriptase activity
GOTERM_BP_DIRECT	GO:1904026~regulation of collagen fibril organization	2	0.27894	0.0704973	EFEMP2, AEBP1	694	2	19308	27.8213	1	0.914839	0.897507		GO:1904026	0.0704973	regulation of collagen fibril organization
GOTERM_BP_DIRECT	GO:0006161~deoxyguanosine catabolic process	2	0.27894	0.0704973	GDA, XDH	694	2	19308	27.8213	1	0.914839	0.897507		GO:0006161	0.0704973	deoxyguanosine catabolic process
GOTERM_BP_DIRECT	GO:0016482~cytosolic transport	2	0.27894	0.0704973	ACTR2, SRSF10	694	2	19308	27.8213	1	0.914839	0.897507		GO:0016482	0.0704973	cytosolic transport
GOTERM_BP_DIRECT	GO:0046967~cytosol to ER transport	2	0.27894	0.0704973	TAP2, TAP1	694	2	19308	27.8213	1	0.914839	0.897507		GO:0046967	0.0704973	cytosol to ER transport
GOTERM_CC_DIRECT	GO:0001527~microfibril	3	0.41841	0.0709666	MFAP4, EFEMP2, FBN1	704	13	20562	6.74017	1	0.280467	0.236697		GO:0001527	0.0709666	microfibril
GOTERM_BP_DIRECT	GO:1904754~positive regulation of vascular associated smooth muscle cell migration	4	0.55788	0.0711674	PAK1, DOCK4, LRP1, IQGAP1	694	27	19308	4.12168	1	0.914839	0.897507		GO:1904754	0.0711674	positive regulation of vascular associated smooth muscle cell migration
GOTERM_BP_DIRECT	GO:0001778~plasma membrane repair	4	0.55788	0.0711674	RAB3A, MYOF, ANXA6, MYH9	694	27	19308	4.12168	1	0.914839	0.897507		GO:0001778	0.0711674	plasma membrane repair
GOTERM_BP_DIRECT	GO:1990000~amyloid fibril formation	4	0.55788	0.0711674	FKBP1A, FUS, HNRNPA1, B2M	694	27	19308	4.12168	1	0.914839	0.897507		GO:1990000	0.0711674	amyloid fibril formation
GOTERM_MF_DIRECT	GO:0008187~poly-pyrimidine tract binding	2	0.27894	0.0722089	PTBP1, U2AF2	695	2	18869	27.1496	1	0.566409	0.534611		GO:0008187	0.0722089	poly-pyrimidine tract binding
GOTERM_MF_DIRECT	GO:0008781~N-acylneuraminate cytidylyltransferase activity	2	0.27894	0.0722089	CMAS, NANS	695	2	18869	27.1496	1	0.566409	0.534611		GO:0008781	0.0722089	N-acylneuraminate cytidylyltransferase activity
GOTERM_MF_DIRECT	GO:0001735~prenylcysteine oxidase activity	2	0.27894	0.0722089	PCYOX1L, PCYOX1	695	2	18869	27.1496	1	0.566409	0.534611		GO:0001735	0.0722089	prenylcysteine oxidase activity
GOTERM_BP_DIRECT	GO:0007029~endoplasmic reticulum organization	5	0.69735	0.0722165	SEC61A1, LMAN1, REEP5, ATL3, SEC31A	694	44	19308	3.16151	1	0.914839	0.897507		GO:0007029	0.0722165	endoplasmic reticulum organization
GOTERM_BP_DIRECT	GO:0042307~positive regulation of protein import into nucleus	5	0.69735	0.0722165	TRIM28, TPR, FLNA, RBM22, IPO5	694	44	19308	3.16151	1	0.914839	0.897507		GO:0042307	0.0722165	positive regulation of protein import into nucleus
GOTERM_BP_DIRECT	GO:0045995~regulation of embryonic development	5	0.69735	0.0722165	LAMA2, RUVBL2, ACTL6A, WDR5, UCHL5	694	44	19308	3.16151	1	0.914839	0.897507		GO:0045995	0.0722165	regulation of embryonic development
GOTERM_BP_DIRECT	GO:1900026~positive regulation of substrate adhesion-dependent cell spreading	5	0.69735	0.0722165	ARPC2, FLNA, P4HB, CALR, S100A10	694	44	19308	3.16151	1	0.914839	0.897507		GO:1900026	0.0722165	positive regulation of substrate adhesion-dependent cell spreading
GOTERM_BP_DIRECT	GO:0030593~neutrophil chemotaxis	7	0.97629	0.0742148	LGALS3, ITGA1, ITGB2, SRP54, NCKAP1L, PPIB, S100A9	694	82	19308	2.37499	1	0.932691	0.915021		GO:0030593	0.0742148	neutrophil chemotaxis
GOTERM_BP_DIRECT	GO:0036211~protein modification process	7	0.97629	0.0742148	ERO1A, RPN2, PARP1, RPN1, PLOD2, MAN2B1, TTLL12	694	82	19308	2.37499	1	0.932691	0.915021		GO:0036211	0.0742148	protein modification process
GOTERM_BP_DIRECT	GO:1902459~positive regulation of stem cell population maintenance	5	0.69735	0.0771203	HDAC2, SMARCB1, BCL7C, ACTL6A, RBBP7	694	45	19308	3.09126	1	0.944591	0.926696		GO:1902459	0.0771203	positive regulation of stem cell population maintenance
GOTERM_BP_DIRECT	GO:0042789~mRNA transcription from RNA polymerase II promoter	5	0.69735	0.0771203	ANXA2, STAT3, HNRNPD, FLNA, S100A10	694	45	19308	3.09126	1	0.944591	0.926696		GO:0042789	0.0771203	mRNA transcription from RNA polymerase II promoter
GOTERM_BP_DIRECT	GO:1904667~negative regulation of ubiquitin protein ligase activity	3	0.41841	0.0772495	RPS7, RPL11, RPS20	694	13	19308	6.42031	1	0.944591	0.926696		GO:1904667	0.0772495	negative regulation of ubiquitin protein ligase activity
GOTERM_BP_DIRECT	GO:0046902~regulation of mitochondrial membrane permeability	3	0.41841	0.0772495	CNP, STAT3, BAK1	694	13	19308	6.42031	1	0.944591	0.926696		GO:0046902	0.0772495	regulation of mitochondrial membrane permeability
GOTERM_BP_DIRECT	GO:0097242~beta-amyloid clearance	3	0.41841	0.0772495	ITGAM, LRP1, ITGB2	694	13	19308	6.42031	1	0.944591	0.926696		GO:0097242	0.0772495	beta-amyloid clearance
GOTERM_BP_DIRECT	GO:1903265~positive regulation of tumor necrosis factor-mediated signaling pathway	3	0.41841	0.0772495	CASP1, HSPA1B, HSPA1A	694	13	19308	6.42031	1	0.944591	0.926696		GO:1903265	0.0772495	positive regulation of tumor necrosis factor-mediated signaling pathway
GOTERM_BP_DIRECT	GO:0032801~receptor catabolic process	3	0.41841	0.0772495	SH3GLB1, NEDD4, LGMN	694	13	19308	6.42031	1	0.944591	0.926696		GO:0032801	0.0772495	receptor catabolic process
GOTERM_BP_DIRECT	GO:0042744~hydrogen peroxide catabolic process	4	0.55788	0.0776696	PRDX4, PXDN, APOA4, EPX	694	28	19308	3.97448	1	0.946076	0.928152		GO:0042744	0.0776696	hydrogen peroxide catabolic process
GOTERM_BP_DIRECT	GO:0006958~complement activation, classical pathway	9	1.25523	0.0781829	C1QB, APCS, C6, C8G, C1S, C9, SERPING1, C4BPA, C1QC	694	124	19308	2.01929	1	0.948679	0.930706		GO:0006958	0.0781829	complement activation, classical pathway
GOTERM_MF_DIRECT	GO:0016787~hydrolase activity	16	2.23152	0.0782425	EIF4A2, EIF4A1, ASAH1, DDX3X, DDX46, HEXA, EIF4A3, OLA1, NUDT5, DPP3, NUDT4, DDX39A, NAAA, ADPRS, AGA, DCPS	695	272	18869	1.59704	1	0.608158	0.574016		GO:0016787	0.0782425	hydrolase activity
GOTERM_BP_DIRECT	GO:0000381~regulation of alternative mRNA splicing, via spliceosome	6	0.83682	0.0794274	PTBP1, RBFOX2, PUF60, TRA2B, MAGOH, HNRNPA1	694	64	19308	2.60825	1	0.960102	0.941912		GO:0000381	0.0794274	regulation of alternative mRNA splicing, via spliceosome
GOTERM_CC_DIRECT	GO:0101031~chaperone complex	4	0.55788	0.0817041	HSPA8, CDC37, RUVBL2, DNAJB11	704	30	20562	3.89432	1	0.319081	0.269285		GO:0101031	0.0817041	chaperone complex
GOTERM_CC_DIRECT	GO:0097730~non-motile cilium	4	0.55788	0.0817041	SEPTIN2, SEPTIN9, RAB8A, SEPTIN7	704	30	20562	3.89432	1	0.319081	0.269285		GO:0097730	0.0817041	non-motile cilium
GOTERM_BP_DIRECT	GO:0022617~extracellular matrix disassembly	5	0.69735	0.0821864	MMP12, CMA1, MMP2, LCP1, CTSS	694	46	19308	3.02406	1	0.989675	0.970925		GO:0022617	0.0821864	extracellular matrix disassembly
GOTERM_MF_DIRECT	GO:0043539~protein serine/threonine kinase activator activity	5	0.69735	0.0826802	MAP2K1, DDX3X, IQGAP1, STK4, IRGM	695	45	18869	3.01663	1	0.636861	0.601107		GO:0043539	0.0826802	protein serine/threonine kinase activator activity
GOTERM_BP_DIRECT	GO:0048812~neuron projection morphogenesis	6	0.83682	0.0836422	SHTN1, PAK1, MAP1S, ITGA1, NCKAP1L, DBN1	694	65	19308	2.56812	1	0.993913	0.975083		GO:0048812	0.0836422	neuron projection morphogenesis
GOTERM_BP_DIRECT	GO:0000045~autophagosome assembly	6	0.83682	0.0836422	VMP1, MAP1LC3B, MAP1LC3A, CTSD, IRGM, RAB33B	694	65	19308	2.56812	1	0.993913	0.975083		GO:0000045	0.0836422	autophagosome assembly
GOTERM_BP_DIRECT	GO:0010033~response to organic substance	4	0.55788	0.0844214	SERPINF2, ANXA5, HPSE, CTSC	694	29	19308	3.83742	1	0.993913	0.975083		GO:0010033	0.0844214	response to organic substance
GOTERM_BP_DIRECT	GO:0034113~heterotypic cell-cell adhesion	4	0.55788	0.0844214	PTPRC, ITGB2, ITGAX, CD1D	694	29	19308	3.83742	1	0.993913	0.975083		GO:0034113	0.0844214	heterotypic cell-cell adhesion
GOTERM_BP_DIRECT	GO:0048041~focal adhesion assembly	4	0.55788	0.0844214	RCC2, ACTN1, PTK2B, SORBS1	694	29	19308	3.83742	1	0.993913	0.975083		GO:0048041	0.0844214	focal adhesion assembly
GOTERM_BP_DIRECT	GO:0070372~regulation of ERK1 and ERK2 cascade	4	0.55788	0.0844214	LYN, FN1, PTPN6, YWHAZ	694	29	19308	3.83742	1	0.993913	0.975083		GO:0070372	0.0844214	regulation of ERK1 and ERK2 cascade
GOTERM_CC_DIRECT	GO:0016459~myosin complex	5	0.69735	0.0858781	MYO18A, MYH9, MYH11, MYH10, MYO1F	704	49	20562	2.98035	1	0.333409	0.281377		GO:0016459	0.0858781	myosin complex
GOTERM_MF_DIRECT	GO:0015631~tubulin binding	6	0.83682	0.0860621	NUMA1, MAP1S, STMN1, TPR, RPS3, TTLL12	695	64	18869	2.54528	1	0.656992	0.620108		GO:0015631	0.0860621	tubulin binding
GOTERM_BP_DIRECT	GO:0006749~glutathione metabolic process	5	0.69735	0.0874122	EEF1G, GSTM2, GSTM1, ARL6IP5, GSTM5	694	47	19308	2.95972	1	1	0.981364		GO:0006749	0.0874122	glutathione metabolic process
GOTERM_BP_DIRECT	GO:0050885~neuromuscular process controlling balance	5	0.69735	0.0874122	AARS1, RBFOX2, HEXB, GAA, HEXA	694	47	19308	2.95972	1	1	0.981364		GO:0050885	0.0874122	neuromuscular process controlling balance
GOTERM_CC_DIRECT	GO:1903561~extracellular vesicle	10	1.3947	0.0876167	DNAJC3, EFEMP2, TUBB2A, RAB3A, COL6A2, COL12A1, ITGB2, OGN, PRELP, TUBB4B	704	156	20562	1.87227	1	0.33817	0.285395		GO:1903561	0.0876167	extracellular vesicle
GOTERM_BP_DIRECT	GO:0031529~ruffle organization	3	0.41841	0.088047	CSF1R, TPM1, CORO1B	694	14	19308	5.96171	1	1	0.981364		GO:0031529	0.088047	ruffle organization
GOTERM_BP_DIRECT	GO:0050777~negative regulation of immune response	3	0.41841	0.088047	LYN, COL3A1, AMBP	694	14	19308	5.96171	1	1	0.981364		GO:0050777	0.088047	negative regulation of immune response
GOTERM_BP_DIRECT	GO:0098761~cellular response to interleukin-7	3	0.41841	0.088047	PDIA3, P4HB, LSP1	694	14	19308	5.96171	1	1	0.981364		GO:0098761	0.088047	cellular response to interleukin-7
GOTERM_BP_DIRECT	GO:0010447~response to acidic pH	3	0.41841	0.088047	SERPINF1, CTSS, LGMN	694	14	19308	5.96171	1	1	0.981364		GO:0010447	0.088047	response to acidic pH
GOTERM_BP_DIRECT	GO:0006287~base-excision repair, gap-filling	3	0.41841	0.088047	FEN1, PCNA, ADPRS	694	14	19308	5.96171	1	1	0.981364		GO:0006287	0.088047	base-excision repair, gap-filling
GOTERM_MF_DIRECT	GO:0003755~peptidyl-prolyl cis-trans isomerase activity	5	0.69735	0.0880553	FKBP11, FKBP1A, FKBP10, FKBP9, PPIB	695	46	18869	2.95105	1	0.665253	0.627906		GO:0003755	0.0880553	peptidyl-prolyl cis-trans isomerase activity
GOTERM_BP_DIRECT	GO:0000902~cell morphogenesis	7	0.97629	0.0887067	CAP1, SCFD1, CDH11, NCKAP1L, STK4, PSMB10, PLEC	694	86	19308	2.26453	1	1	0.981364		GO:0000902	0.0887067	cell morphogenesis
GOTERM_BP_DIRECT	GO:0098586~cellular response to virus	7	0.97629	0.0887067	EIF5A, MMP12, DDX3X, CALR, IRGM, NFKB1, JAK1	694	86	19308	2.26453	1	1	0.981364		GO:0098586	0.0887067	cellular response to virus
GOTERM_BP_DIRECT	GO:0006417~regulation of translation	7	0.97629	0.0887067	RBM3, MAGOH, RPS3, PA2G4, ABCE1, EIF4E, GCN1	694	86	19308	2.26453	1	1	0.981364		GO:0006417	0.0887067	regulation of translation
GOTERM_BP_DIRECT	GO:0071333~cellular response to glucose stimulus	7	0.97629	0.0887067	PPP3CA, LGALS1, NCF1, CMA1, TRA2B, SERPINF1, RACK1	694	86	19308	2.26453	1	1	0.981364		GO:0071333	0.0887067	cellular response to glucose stimulus
GOTERM_MF_DIRECT	GO:0004553~hydrolase activity, hydrolyzing O-glycosyl compounds	4	0.55788	0.0893278	GANAB, GAA, ADPRS, ENGASE	695	29	18869	3.74478	1	0.665253	0.627906		GO:0004553	0.0893278	hydrolase activity, hydrolyzing O-glycosyl compounds
GOTERM_MF_DIRECT	GO:0042393~histone binding	12	1.67364	0.0900704	SET, IPO9, STAT1, CTSL, WDR5, NAP1L1, CD1D, PKN1, RBBP7, NPM3, IPO7, NAP1L4	695	189	18869	1.72379	1	0.665253	0.627906		GO:0042393	0.0900704	histone binding
GOTERM_BP_DIRECT	GO:0018149~peptide cross-linking	4	0.55788	0.0914137	COL3A1, ANXA1, FN1, F13A1	694	30	19308	3.70951	1	1	0.981364		GO:0018149	0.0914137	peptide cross-linking
GOTERM_BP_DIRECT	GO:0050900~leukocyte migration	4	0.55788	0.0914137	LYN, AIMP1, B4GALT1, MYH9	694	30	19308	3.70951	1	1	0.981364		GO:0050900	0.0914137	leukocyte migration
GOTERM_BP_DIRECT	GO:0051602~response to electrical stimulus	4	0.55788	0.0914137	RAB3A, MMP2, HNRNPD, CD14	694	30	19308	3.70951	1	1	0.981364		GO:0051602	0.0914137	response to electrical stimulus
GOTERM_BP_DIRECT	GO:0010592~positive regulation of lamellipodium assembly	4	0.55788	0.0914137	ACTR2, ARPC2, FSCN1, RAC2	694	30	19308	3.70951	1	1	0.981364		GO:0010592	0.0914137	positive regulation of lamellipodium assembly
GOTERM_BP_DIRECT	GO:0005975~carbohydrate metabolic process	11	1.53417	0.0915631	GANAB, B4GALT1, GNPDA2, ADPGK, HEXB, GAA, HEXA, MLEC, MAN2B1, SIAE, GUSB	694	172	19308	1.77927	1	1	0.981364		GO:0005975	0.0915631	carbohydrate metabolic process
GOTERM_MF_DIRECT	GO:0019887~protein kinase regulator activity	3	0.41841	0.0918127	CDC37, RAC2, GCN1	695	14	18869	5.81778	1	0.665253	0.627906		GO:0019887	0.0918127	protein kinase regulator activity
GOTERM_MF_DIRECT	GO:0004298~threonine-type endopeptidase activity	3	0.41841	0.0918127	PSMB8, PSMB10, PSMB9	695	14	18869	5.81778	1	0.665253	0.627906		GO:0004298	0.0918127	threonine-type endopeptidase activity
GOTERM_MF_DIRECT	GO:0051011~microtubule minus-end binding	3	0.41841	0.0918127	MACF1, NIN, NUMA1	695	14	18869	5.81778	1	0.665253	0.627906		GO:0051011	0.0918127	microtubule minus-end binding
GOTERM_BP_DIRECT	GO:0021762~substantia nigra development	5	0.69735	0.0927945	CNP, YWHAQ, HSPA5, CKB, YWHAH	694	48	19308	2.89805	1	1	0.981364		GO:0021762	0.0927945	substantia nigra development
GOTERM_BP_DIRECT	GO:0042981~regulation of apoptotic process	14	1.95258	0.0929249	STAT1, ACTN1, ACTL6A, SEPTIN4, SLK, LGALS1, RUVBL2, PEA15, CASP1, RPS3, PTPN6, CALR, PAK2, TPT1	694	240	19308	1.62291	1	1	0.981364		GO:0042981	0.0929249	regulation of apoptotic process
GOTERM_BP_DIRECT	GO:0006914~autophagy	10	1.3947	0.0942562	VMP1, SH3GLB1, DAP, MAP1LC3B, MAP1S, ITGB4, ANXA7, S100A9, RAB8A, ARSB	694	151	19308	1.84247	1	1	0.981364		GO:0006914	0.0942562	autophagy
GOTERM_BP_DIRECT	GO:0006936~muscle contraction	7	0.97629	0.0964911	DES, TPM4, CALD1, TPM3, TPM2, TPM1, MYOF	694	88	19308	2.21306	1	1	0.981364		GO:0006936	0.0964911	muscle contraction
GOTERM_MF_DIRECT	GO:0005102~receptor binding	21	2.92887	0.0972588	LYN, GSTM2, ANXA1, LAMA2, FGL1, STAT3, ITGA1, FN1, SRI, DIAPH1, MFAP4, PTPRC, DNAJB11, ANGPTL3, RACK1, STRAP, PTK2B, GUSB, HSPA1B, HSPA1A, RAB8B	695	397	18869	1.43613	1	0.688771	0.650103		GO:0005102	0.0972588	receptor binding
GOTERM_CC_DIRECT	GO:0008021~synaptic vesicle	9	1.25523	0.0981331	TMED9, RAB3A, SEPTIN2, RAB3D, RAB13, SEPTIN4, SEC22B, RAB8A, RAB8B	704	137	20562	1.91873	1	0.367471	0.310123		GO:0008021	0.0981331	synaptic vesicle
GOTERM_BP_DIRECT	GO:0007173~epidermal growth factor receptor signaling pathway	5	0.69735	0.0983303	PIGR, ARF4, EFEMP1, PTK2B, IQGAP1	694	49	19308	2.83891	1	1	0.981364		GO:0007173	0.0983303	epidermal growth factor receptor signaling pathway
GOTERM_CC_DIRECT	GO:0008537~proteasome activator complex	2	0.27894	0.0991057	PSME1, PSME2	704	3	20562	19.4716	1	0.367471	0.310123		GO:0008537	0.0991057	proteasome activator complex
GOTERM_CC_DIRECT	GO:0008074~guanylate cyclase complex, soluble	2	0.27894	0.0991057	GUCY1A1, GUCY1B1	704	3	20562	19.4716	1	0.367471	0.310123		GO:0008074	0.0991057	guanylate cyclase complex, soluble
GOTERM_CC_DIRECT	GO:0005589~collagen type VI trimer	2	0.27894	0.0991057	COL6A1, DCN	704	3	20562	19.4716	1	0.367471	0.310123		GO:0005589	0.0991057	collagen type VI trimer
GOTERM_CC_DIRECT	GO:0031905~early endosome lumen	2	0.27894	0.0991057	B2M, PDLIM4	704	3	20562	19.4716	1	0.367471	0.310123		GO:0031905	0.0991057	early endosome lumen
GOTERM_CC_DIRECT	GO:0005602~complement component C1 complex	2	0.27894	0.0991057	C1QB, C1QC	704	3	20562	19.4716	1	0.367471	0.310123		GO:0005602	0.0991057	complement component C1 complex
GOTERM_CC_DIRECT	GO:0097513~myosin II filament	2	0.27894	0.0991057	MYH9, MYH10	704	3	20562	19.4716	1	0.367471	0.310123		GO:0097513	0.0991057	myosin II filament
GOTERM_BP_DIRECT	GO:0010952~positive regulation of peptidase activity	3	0.41841	0.0992587	RCN3, FN1, FBLN1	694	15	19308	5.56427	1	1	0.981364		GO:0010952	0.0992587	positive regulation of peptidase activity
GOTERM_BP_DIRECT	GO:0000028~ribosomal small subunit assembly	3	0.41841	0.0992587	RPS28, RPS5, RPSA	694	15	19308	5.56427	1	1	0.981364		GO:0000028	0.0992587	ribosomal small subunit assembly
GOTERM_BP_DIRECT	GO:0030970~retrograde protein transport, ER to cytosol	3	0.41841	0.0992587	SEL1L, SEC61B, HSP90B1	694	15	19308	5.56427	1	1	0.981364		GO:0030970	0.0992587	retrograde protein transport, ER to cytosol
GOTERM_BP_DIRECT	GO:0071498~cellular response to fluid shear stress	3	0.41841	0.0992587	MMP2, PTK2B, PLEC	694	15	19308	5.56427	1	1	0.981364		GO:0071498	0.0992587	cellular response to fluid shear stress
GOTERM_BP_DIRECT	GO:0006937~regulation of muscle contraction	3	0.41841	0.0992587	TPM1, ANXA6, MYL9	694	15	19308	5.56427	1	1	0.981364		GO:0006937	0.0992587	regulation of muscle contraction
GOTERM_BP_DIRECT	GO:0030948~negative regulation of vascular endothelial growth factor receptor signaling pathway	3	0.41841	0.0992587	PDCD6, NEDD4, EMILIN1	694	15	19308	5.56427	1	1	0.981364		GO:0030948	0.0992587	negative regulation of vascular endothelial growth factor receptor signaling pathway
GOTERM_MF_DIRECT	GO:0003774~motor activity	5	0.69735	0.0992947	MYO18A, MYH9, MYH11, MYH10, MYO1F	695	48	18869	2.82809	1	0.688771	0.650103		GO:0003774	0.0992947	motor activity
GOTERM_BP_DIRECT	GO:0006364~rRNA processing	9	1.25523	0.0995583	RPS17, RPS28, RPS7, DIS3, RPL11, EIF4A3, PA2G4, NPM3, BYSL	694	131	19308	1.91139	1	1	0.981364		GO:0006364	0.0995583	rRNA processing
GOTERM_BP_DIRECT	GO:0006397~mRNA processing	13	1.81311	0.0998441	HSPA8, RBFOX2, SRSF1, U2AF1, HNRNPR, LGALS3, PTBP1, PUF60, U2AF2, HNRNPA2B1, HNRNPA1, DCPS, SRSF11	694	220	19308	1.64399	1	1	0.981364		GO:0006397	0.0998441	mRNA processing

## Sheet: KStudy2_UrineStudy2_up
Rivigo GO reduction	Kidney - Urine study 2 - proteomics upregulated
Category	Term	Count	%	PValue	Genes	List Total	Pop Hits	Pop Total	Fold Enrichment	Bonferroni	Benjamini	FDR		Term	PValue
GOTERM_CC_DIRECT	GO:0005576~extracellular region	71	75.5319	1.33266e-49	COL18A1, ECM1, SERPINA1, PROS1, IL1RAP, C8B, SERPINA6, CLU, C8A, SERPINA4, C4B, B2M, HGFAC, FGB, FGA, AHSG, IGFBP3, SERPINF1, MST1, ADIPOQ, FGG, SERPINF2, APOA2, RNASE4, APOA4, AZGP1, SELENOP, ANGPTL3, COL8A1, SERPING1, FETUB, MASP2, CFB, CFD, CRP, ITIH4, CPB2, ITIH3, ITIH2, CFH, SERPINC1, CFI, AFM, PLG, REG3G, ITIH1, CPN2, KNG1, C2, C3, VTN, HPX, C6, APOH, C9, GC, AMBP, SERPIND1, F10, LUM, F12, …	94	2129	20562	7.29491	2.25219e-47	2.25219e-47	2.05229e-47		GO:0005576	1.33266e-49	extracellular region
GOTERM_CC_DIRECT	GO:0072562~blood microparticle	34	36.1702	2.24831e-48	ITIH4, ITIH2, CFH, SERPINC1, PROS1, AFM, PLG, ITIH1, C8A, CLU, CPN2, KNG1, C3, C4B, VTN, HPX, C9, GC, FGB, FGA, AMBP, AHSG, FGG, SERPINF2, APOA2, APOA4, CP, AGT, TF, ALB, SERPING1, HRG, PFN1, CFB	94	145	20562	51.2919	3.79964e-46	1.89982e-46	1.7312e-46		GO:0072562	2.24831e-48	blood microparticle
GOTERM_CC_DIRECT	GO:0005615~extracellular space	66	70.2128	2.50055e-45	COL18A1, ECM1, SERPINA1, PROS1, SERPINA10, C8B, SERPINA6, CLU, C8A, SERPINA4, C4B, B2M, HGFAC, FGB, FGA, AHSG, IGFBP3, SERPINF1, MST1, ADIPOQ, FGG, SERPINF2, RNASE4, APOA4, AZGP1, ANGPTL3, COL8A1, SERPING1, FETUB, MASP2, CFB, CFD, CRP, CPB2, CFH, SERPINC1, CFI, AFM, DPT, PLG, REG3G, EGFR, CPN2, KNG1, C2, C3, VTN, HPX, C6, APOH, C9, GC, AMBP, SERPIND1, F10, LUM, F12, CP, SOD3, AGT, COL1A1, COL3A1,…	94	1938	20562	7.44951	4.22593e-43	1.40864e-43	1.28362e-43		GO:0005615	2.50055e-45	extracellular space
GOTERM_CC_DIRECT	GO:0070062~extracellular exosome	63	67.0213	7.22642e-38	COL18A1, ECM1, SERPINA1, PROS1, SERPINA10, C8B, SERPINA6, CLU, C8A, SERPINA4, C4B, B2M, FGB, FGA, AHSG, SERPINF1, FGG, SERPINF2, APOA2, APOA4, AZGP1, SELENOP, SERPING1, FETUB, MASP2, PFN1, CFB, CFD, ITIH4, MTMR2, CPB2, ITIH3, ITIH2, CFH, SERPINC1, CFI, AFM, PLG, ITIH1, CST6, CPN2, KNG1, C2, C3, VTN, HPX, C6, APOH, C9, GC, AMBP, SERPIND1, LUM, F12, CP, SOD3, AGT, MYO1E, TF, COL1A2, ALB, HRG, KLKB1	94	2218	20562	6.21322	1.22127e-35	3.05316e-36	2.78217e-36		GO:0070062	7.22642e-38	extracellular exosome
GOTERM_BP_DIRECT	GO:0010951~negative regulation of endopeptidase activity	25	26.5957	1.17687e-30	ITIH4, ITIH3, SERPINA1, ITIH2, SERPINC1, PROS1, SERPINA10, SERPINA6, ITIH1, CST6, SERPINA4, KNG1, C3, C4B, VTN, AMBP, SERPIND1, AHSG, SERPINF1, SERPINF2, AGT, SERPING1, UBE2O, FETUB, HRG	94	146	19308	35.172	9.99161e-28	9.97984e-28	9.63855e-28		GO:0010951	1.17687e-30	negative regulation of endopeptidase activity
GOTERM_CC_DIRECT	GO:0005788~endoplasmic reticulum lumen	24	25.5319	5.7288e-22	FGA, COL18A1, SERPINA1, ITIH2, SERPIND1, F10, AHSG, SERPINC1, IGFBP3, SERPINA10, FGG, APOA2, APOA4, CP, KNG1, C3, COL1A1, COL3A1, TF, COL1A2, ALB, SERPING1, COL8A1, B2M	94	306	20562	17.1564	9.68167e-20	1.93633e-20	1.76447e-20		GO:0005788	5.7288e-22	endoplasmic reticulum lumen
GOTERM_BP_DIRECT	GO:0042730~fibrinolysis	11	11.7021	3.62661e-19	FGB, FGA, CPB2, F12, PROS1, SERPINF2, FGG, SERPING1, PLG, HRG, KLKB1	94	19	19308	118.918	3.07899e-16	1.53768e-16	1.4851e-16		GO:0042730	3.62661e-19	fibrinolysis
GOTERM_MF_DIRECT	GO:0004867~serine-type endopeptidase inhibitor activity	16	17.0213	2.12606e-18	ITIH4, ITIH3, SERPINA1, ITIH2, AMBP, SERPIND1, SERPINC1, SERPINF1, SERPINF2, SERPINA10, SERPINA6, ITIH1, SERPINA4, AGT, SERPING1, HRG	94	103	18869	31.182	4.52851e-16	4.54977e-16	4.31591e-16		GO:0004867	2.12606e-18	serine-type endopeptidase inhibitor activity
GOTERM_CC_DIRECT	GO:0031093~platelet alpha granule lumen	14	14.8936	2.83838e-18	FGB, CFD, FGA, SERPINA1, AHSG, PROS1, SERPINF2, FGG, PLG, CLU, KNG1, ALB, SERPING1, HRG	94	67	20562	45.7078	4.79687e-16	7.99478e-17	7.28518e-17		GO:0031093	2.83838e-18	platelet alpha granule lumen
GOTERM_BP_DIRECT	GO:0007596~blood coagulation	15	15.9574	6.15985e-18	FGB, FGA, CPB2, SERPINA1, SERPIND1, F10, SERPINC1, F12, PROS1, SERPINA10, PLG, KNG1, SERPING1, KLKB1, HGFAC	94	88	19308	35.0121	5.22971e-15	1.74118e-15	1.68164e-15		GO:0007596	6.15985e-18	blood coagulation
GOTERM_BP_DIRECT	GO:0006956~complement activation	11	11.7021	1.25048e-17	C4B, CFD, C3, C6, CFH, C9, C8B, CLU, C8A, CFB, C2	94	25	19308	90.3779	1.06166e-14	2.65102e-15	2.56036e-15		GO:0006956	1.25048e-17	complement activation
GOTERM_MF_DIRECT	GO:0004866~endopeptidase inhibitor activity	12	12.766	1.97851e-16	C4B, C3, ITIH4, ITIH3, ITIH2, SERPIND1, AHSG, PROS1, SERPINF2, FETUB, HRG, KNG1	94	45	18869	53.5291	4.72955e-14	2.117e-14	2.00819e-14		GO:0004866	1.97851e-16	endopeptidase inhibitor activity
GOTERM_MF_DIRECT	GO:0005201~extracellular matrix structural constituent	13	13.8298	3.625e-12	FGB, FGA, COL18A1, ECM1, LUM, ADIPOQ, FGG, DPT, COL1A1, VTN, COL3A1, COL1A2, COL8A1	94	138	18869	18.9097	7.72123e-10	2.58583e-10	2.45291e-10		GO:0005201	3.625e-12	extracellular matrix structural constituent
GOTERM_BP_DIRECT	GO:0006958~complement activation, classical pathway	12	12.766	1.90886e-11	C4B, CRP, C3, C6, C9, CFI, SERPING1, MASP2, C8B, CLU, C8A, C2	94	124	19308	19.8778	1.62062e-08	3.23743e-09	3.12672e-09		GO:0006958	1.90886e-11	complement activation, classical pathway
GOTERM_BP_DIRECT	GO:0006957~complement activation, alternative pathway	7	7.44681	1.25728e-10	CFD, C3, CFH, C9, C8B, C8A, CFB	94	17	19308	84.5782	1.06743e-07	1.77696e-08	1.71619e-08		GO:0006957	1.25728e-10	complement activation, alternative pathway
GOTERM_BP_DIRECT	GO:0051918~negative regulation of fibrinolysis	6	6.38298	2.90295e-09	VTN, CPB2, APOH, SERPINF2, PLG, HRG	94	13	19308	94.802	2.46461e-06	3.51672e-07	3.39646e-07		GO:0051918	2.90295e-09	negative regulation of fibrinolysis
GOTERM_CC_DIRECT	GO:0031089~platelet dense granule lumen	6	6.38298	3.291e-09	ITIH4, ITIH3, ECM1, APOH, SELENOP, SERPINA4	94	14	20562	93.7477	5.56179e-07	7.94542e-08	7.24021e-08		GO:0031089	3.291e-09	platelet dense granule lumen
GOTERM_MF_DIRECT	GO:0004252~serine-type endopeptidase activity	11	11.7021	3.84167e-08	CFD, F10, F12, CFI, MST1, MASP2, PLG, KLKB1, CFB, HGFAC, C2	94	193	18869	11.4408	8.18272e-06	2.05529e-06	1.94965e-06		GO:0004252	3.84167e-08	serine-type endopeptidase activity
GOTERM_BP_DIRECT	GO:0031639~plasminogen activation	5	5.31915	1.6219e-07	FGB, FGA, APOH, FGG, KLKB1	94	11	19308	93.3656	0.00013769	1.71922e-05	1.66042e-05		GO:0031639	1.6219e-07	plasminogen activation
GOTERM_CC_DIRECT	GO:0009986~cell surface	16	17.0213	1.71458e-07	FGB, FGA, AMBP, SERPINF2, ADIPOQ, FGG, APOA4, PLG, CLU, EGFR, C3, TF, TMX3, APOH, ANGPTL3, HRG	94	639	20562	5.47718	2.89759e-05	3.62204e-06	3.30056e-06		GO:0009986	1.71458e-07	cell surface
GOTERM_MF_DIRECT	GO:0008201~heparin binding	10	10.6383	2.13824e-07	VTN, CFH, SERPIND1, SERPINC1, APOH, SERPINA10, ANGPTL3, HRG, SOD3, KNG1	94	176	18869	11.4053	4.55435e-05	9.15167e-06	8.68126e-06		GO:0008201	2.13824e-07	heparin binding
GOTERM_BP_DIRECT	GO:0006508~proteolysis	13	13.8298	6.16336e-07	CFD, CPB2, CFH, F10, F12, CFI, MST1, PLG, C2, MASP2, KLKB1, HGFAC, CFB	94	409	19308	6.52874	0.000523132	5.80725e-05	5.60866e-05		GO:0006508	6.16336e-07	proteolysis
GOTERM_MF_DIRECT	GO:0004869~cysteine-type endopeptidase inhibitor activity	6	6.38298	6.48432e-07	AHSG, UBE2O, FETUB, HRG, CST6, KNG1	94	34	18869	35.4237	0.000138107	2.31274e-05	2.19386e-05		GO:0004869	6.48432e-07	cysteine-type endopeptidase inhibitor activity
GOTERM_BP_DIRECT	GO:0006953~acute-phase response	6	6.38298	1.71851e-06	CRP, ITIH4, SERPINA1, AHSG, SERPINF2, REG3G	94	42	19308	29.3435	0.00145796	0.00014573	0.000140746		GO:0006953	1.71851e-06	acute-phase response
GOTERM_CC_DIRECT	GO:0005579~membrane attack complex	4	4.25532	3.09411e-06	C6, C9, C8B, C8A	94	7	20562	124.997	0.000522769	5.81006e-05	5.29437e-05		GO:0005579	3.09411e-06	membrane attack complex
GOTERM_MF_DIRECT	GO:0005102~receptor binding	12	12.766	4.04735e-06	FGB, C3, FGA, MST1, ADIPOQ, FGG, APOA2, ANGPTL3, PLG, HRG, CLU, KNG1	94	397	18869	6.06753	0.000861716	0.000123733	0.000117373		GO:0005102	4.04735e-06	receptor binding
GOTERM_BP_DIRECT	GO:0048260~positive regulation of receptor-mediated endocytosis	5	5.31915	4.1636e-06	C3, VTN, TF, CLU, B2M	94	23	19308	44.6531	0.00352866	0.000320976	0.000309999		GO:0048260	4.1636e-06	positive regulation of receptor-mediated endocytosis
GOTERM_CC_DIRECT	GO:0005577~fibrinogen complex	4	4.25532	4.93434e-06	FGB, FGA, SERPINF2, FGG	94	8	20562	109.372	0.000833558	8.33903e-05	7.59888e-05		GO:0005577	4.93434e-06	fibrinogen complex
GOTERM_BP_DIRECT	GO:0045087~innate immune response	14	14.8936	5.77728e-06	FGB, CRP, FGA, F12, CFI, IL1RAP, C8B, CLU, C8A, C2, C4B, C6, SERPING1, B2M	94	599	19308	4.80077	0.00489292	0.000408261	0.0003943		GO:0045087	5.77728e-06	innate immune response
GOTERM_BP_DIRECT	GO:0030199~collagen fibril organization	6	6.38298	1.03048e-05	COL1A1, COL3A1, COL1A2, LUM, SERPINF2, DPT	94	60	19308	20.5404	0.0087107	0.000672193	0.000649205		GO:0030199	1.03048e-05	collagen fibril organization
GOTERM_MF_DIRECT	GO:0002020~protease binding	7	7.44681	1.81944e-05	COL1A1, COL3A1, ECM1, SERPINA1, COL1A2, SERPINC1, SERPINF2	94	111	18869	12.6589	0.00386794	0.0004867	0.000461683		GO:0002020	1.81944e-05	protease binding
GOTERM_BP_DIRECT	GO:0030212~hyaluronan metabolic process	4	4.25532	2.30627e-05	ITIH4, ITIH3, ITIH2, ITIH1	94	12	19308	68.4681	0.01939	0.00139694	0.00134917		GO:0030212	2.30627e-05	hyaluronan metabolic process
GOTERM_CC_DIRECT	GO:0031012~extracellular matrix	9	9.57447	2.36472e-05	COL1A1, COL18A1, COL3A1, ECM1, COL1A2, AHSG, LUM, COL8A1, CPN2	94	260	20562	7.57193	0.00398845	0.000363307	0.000331061		GO:0031012	2.36472e-05	extracellular matrix
GOTERM_BP_DIRECT	GO:0030195~negative regulation of blood coagulation	4	4.25532	3.78924e-05	VTN, PROS1, APOH, KNG1	94	14	19308	58.6869	0.0316593	0.00214219	0.00206893		GO:0030195	3.78924e-05	negative regulation of blood coagulation
GOTERM_BP_DIRECT	GO:0051258~protein polymerization	4	4.25532	4.72003e-05	FGB, FGA, VTN, FGG	94	15	19308	54.7745	0.0392816	0.00250161	0.00241606		GO:0051258	4.72003e-05	protein polymerization
GOTERM_MF_DIRECT	GO:0030020~extracellular matrix structural constituent conferring tensile strength	5	5.31915	4.87016e-05	COL1A1, COL18A1, COL3A1, COL1A2, COL8A1	94	41	18869	24.4798	0.0103201	0.00115802	0.00109849		GO:0030020	4.87016e-05	extracellular matrix structural constituent conferring tensile strength
GOTERM_BP_DIRECT	GO:0050778~positive regulation of immune response	4	4.25532	0.000116212	C6, C9, C8B, C8A	94	20	19308	41.0809	0.0939585	0.00579695	0.00559871		GO:0050778	0.000116212	positive regulation of immune response
GOTERM_BP_DIRECT	GO:0051919~positive regulation of fibrinolysis	3	3.19149	0.000136847	F12, PLG, KLKB1	94	4	19308	154.053	0.109695	0.00644704	0.00622656		GO:0051919	0.000136847	positive regulation of fibrinolysis
GOTERM_BP_DIRECT	GO:0019835~cytolysis	4	4.25532	0.000155897	C6, C9, C8B, C8A	94	22	19308	37.3462	0.12398	0.00695791	0.00671997		GO:0019835	0.000155897	cytolysis
GOTERM_BP_DIRECT	GO:0007160~cell-matrix adhesion	6	6.38298	0.000167889	FGB, FGA, VTN, COL3A1, FGG, ANGPTL3	94	107	19308	11.518	0.132855	0.00711848	0.00687504		GO:0007160	0.000167889	cell-matrix adhesion
GOTERM_BP_DIRECT	GO:0071230~cellular response to amino acid stimulus	5	5.31915	0.000187448	COL1A1, COL3A1, COL1A2, LARS1, EGFR	94	59	19308	17.4071	0.147138	0.00756932	0.00731046		GO:0071230	0.000187448	cellular response to amino acid stimulus
GOTERM_BP_DIRECT	GO:0030168~platelet activation	5	5.31915	0.000256926	FGB, FGA, COL3A1, FGG, HRG	94	64	19308	16.0472	0.196002	0.00990334	0.00956466		GO:0030168	0.000256926	platelet activation
GOTERM_BP_DIRECT	GO:2000427~positive regulation of apoptotic cell clearance	3	3.19149	0.000339974	C4B, C3, C2	94	6	19308	102.702	0.250753	0.0125347	0.012106		GO:2000427	0.000339974	positive regulation of apoptotic cell clearance
GOTERM_MF_DIRECT	GO:0001848~complement binding	3	3.19149	0.000355873	C4B, C8A, CFB	94	6	18869	100.367	0.0730119	0.00761569	0.00722423		GO:0001848	0.000355873	complement binding
GOTERM_BP_DIRECT	GO:0072378~blood coagulation, fibrin clot formation	3	3.19149	0.00047447	FGB, FGA, FGG	94	7	19308	88.0304	0.331635	0.0167646	0.0161913		GO:0072378	0.00047447	blood coagulation, fibrin clot formation
GOTERM_BP_DIRECT	GO:1905920~positive regulation of CoA-transferase activity	3	3.19149	0.000630642	APOA2, APOA4, AGT	94	8	19308	77.0266	0.414673	0.0213914	0.0206598		GO:1905920	0.000630642	positive regulation of CoA-transferase activity
GOTERM_BP_DIRECT	GO:0045907~positive regulation of vasoconstriction	4	4.25532	0.000807681	FGB, FGA, FGG, EGFR	94	38	19308	21.6215	0.496413	0.0253861	0.0245179		GO:0045907	0.000807681	positive regulation of vasoconstriction
GOTERM_BP_DIRECT	GO:0010873~positive regulation of cholesterol esterification	3	3.19149	0.000808283	APOA2, APOA4, AGT	94	9	19308	68.4681	0.49667	0.0253861	0.0245179		GO:0010873	0.000808283	positive regulation of cholesterol esterification
GOTERM_CC_DIRECT	GO:0005581~collagen trimer	5	5.31915	0.000808543	COL1A1, COL18A1, COL3A1, COL1A2, ADIPOQ	94	92	20562	11.8883	0.127767	0.011387	0.0103763		GO:0005581	0.000808543	collagen trimer
GOTERM_BP_DIRECT	GO:0090277~positive regulation of peptide hormone secretion	3	3.19149	0.00100719	FGB, FGA, FGG	94	10	19308	61.6213	0.574943	0.0295344	0.0285243		GO:0090277	0.00100719	positive regulation of peptide hormone secretion
GOTERM_BP_DIRECT	GO:0001895~retina homeostasis	4	4.25532	0.00101002	AZGP1, TF, ALB, B2M	94	41	19308	20.0394	0.575965	0.0295344	0.0285243		GO:0001895	0.00101002	retina homeostasis
GOTERM_BP_DIRECT	GO:0097421~liver regeneration	4	4.25532	0.00108394	VTN, CPB2, SERPINA10, EGFR	94	42	19308	19.5623	0.601785	0.0306393	0.0295915		GO:0097421	0.00108394	liver regeneration
GOTERM_BP_DIRECT	GO:0030198~extracellular matrix organization	6	6.38298	0.00121661	COL1A1, VTN, COL18A1, COL3A1, COL1A2, COL8A1	94	165	19308	7.46925	0.64425	0.0325194	0.0314073		GO:0030198	0.00121661	extracellular matrix organization
GOTERM_BP_DIRECT	GO:0030193~regulation of blood coagulation	3	3.19149	0.00122715	APOH, SERPING1, HRG	94	11	19308	56.0193	0.647424	0.0325194	0.0314073		GO:0030193	0.00122715	regulation of blood coagulation
GOTERM_MF_DIRECT	GO:0048407~platelet-derived growth factor binding	3	3.19149	0.00128407	COL1A1, COL3A1, COL1A2	94	11	18869	54.7456	0.239427	0.024981	0.0236969		GO:0048407	0.00128407	platelet-derived growth factor binding
GOTERM_CC_DIRECT	GO:0005796~Golgi lumen	5	5.31915	0.00137004	VTN, F10, LUM, PROS1, SOD3	94	106	20562	10.3181	0.206813	0.0178106	0.0162297		GO:0005796	0.00137004	Golgi lumen
GOTERM_MF_DIRECT	GO:0042802~identical protein binding	19	20.2128	0.00160291	CRP, COL18A1, MTMR2, SERPINA1, CFH, SERPINC1, GRIK5, ADIPOQ, FGG, APOA4, CTPS1, EGFR, COL1A1, VTN, COL1A2, APOH, ALB, MASP2, B2M	94	1714	18869	2.22517	0.289434	0.0285853	0.0271159		GO:0042802	0.00160291	identical protein binding
GOTERM_CC_DIRECT	GO:0042627~chylomicron	3	3.19149	0.00177759	APOH, APOA2, APOA4	94	14	20562	46.8739	0.259685	0.0208625	0.0190108		GO:0042627	0.00177759	chylomicron
GOTERM_CC_DIRECT	GO:0005783~endoplasmic reticulum	14	14.8936	0.00185171	FGB, FGA, SERPINA1, AMBP, GRIK5, ADIPOQ, CLU, VTN, NSDHL, SPTLC1, COL1A2, TMX3, LARS1, ALB	94	1142	20562	2.68163	0.268917	0.0208625	0.0190108		GO:0005783	0.00185171	endoplasmic reticulum
GOTERM_MF_DIRECT	GO:0051087~chaperone binding	5	5.31915	0.00214354	FGB, ALB, PLG, CLU, CP	94	110	18869	9.12427	0.36686	0.035286	0.0334722		GO:0051087	0.00214354	chaperone binding
GOTERM_CC_DIRECT	GO:0031091~platelet alpha granule	3	3.19149	0.00263327	FGB, FGA, FGG	94	17	20562	38.602	0.359566	0.0278139	0.0253452		GO:0031091	0.00263327	platelet alpha granule
GOTERM_BP_DIRECT	GO:0034116~positive regulation of heterotypic cell-cell adhesion	3	3.19149	0.00263577	FGB, FGA, FGG	94	16	19308	38.5133	0.893619	0.0677314	0.0654151		GO:0034116	0.00263577	positive regulation of heterotypic cell-cell adhesion
GOTERM_BP_DIRECT	GO:0009617~response to bacterium	5	5.31915	0.00278895	CFD, C3, ADIPOQ, CFB, C2	94	121	19308	8.48778	0.906625	0.0695598	0.067181		GO:0009617	0.00278895	response to bacterium
GOTERM_MF_DIRECT	GO:0005507~copper ion binding	4	4.25532	0.00308639	ALB, APOA4, SOD3, CP	94	59	18869	13.6091	0.48233	0.0440324	0.0417691		GO:0005507	0.00308639	copper ion binding
GOTERM_MF_DIRECT	GO:0008236~serine-type peptidase activity	4	4.25532	0.00308639	CFD, CFI, PLG, HGFAC	94	59	18869	13.6091	0.48233	0.0440324	0.0417691		GO:0008236	0.00308639	serine-type peptidase activity
GOTERM_BP_DIRECT	GO:0051592~response to calcium ion	4	4.25532	0.0033316	FGB, FGA, FGG, EGFR	94	62	19308	13.2519	0.941179	0.0786669	0.0759767		GO:0051592	0.0033316	response to calcium ion
GOTERM_BP_DIRECT	GO:0043691~reverse cholesterol transport	3	3.19149	0.00333963	APOA2, APOA4, CLU	94	18	19308	34.234	0.94158	0.0786669	0.0759767		GO:0043691	0.00333963	reverse cholesterol transport
GOTERM_CC_DIRECT	GO:0034361~very-low-density lipoprotein particle	3	3.19149	0.00401856	APOH, APOA2, APOA4	94	21	20562	31.2492	0.493638	0.0399492	0.0364034		GO:0034361	0.00401856	very-low-density lipoprotein particle
GOTERM_MF_DIRECT	GO:0005515~protein binding	75	79.7872	0.00402095	PHLDB1, ECM1, SERPINA1, PROS1, SERPINA10, CLU, C8A, NSDHL, SPTLC1, B2M, HGFAC, FGB, SRRM2, FGA, IGFBP3, SERPINF1, MST1, ADIPOQ, FGG, SERPINF2, APOA2, APOA4, CTPS1, AZGP1, TMX3, LARS1, COL8A1, SERPING1, FETUB, MASP2, PFN1, CFB, CRP, MACF1, ITIH4, MTMR2, ITIH3, ITIH2, CFH, SERPINC1, CFI, AFM, DPT, PLG, ABCB9, ITIH1, CST6, EGFR, KNG1, C2, C3, VTN, HPX, C6, APOH, C9, VPS8, AMBP, F10, LUM, YIPF3, F12,…	94	12554	18869	1.19922	0.576071	0.0537803	0.0510158		GO:0005515	0.00402095	protein binding
GOTERM_BP_DIRECT	GO:0006826~iron ion transport	3	3.19149	0.00412139	TF, B2M, CP	94	20	19308	30.8106	0.969992	0.0944578	0.0912275		GO:0006826	0.00412139	iron ion transport
GOTERM_BP_DIRECT	GO:0032930~positive regulation of superoxide anion generation	3	3.19149	0.004541	CRP, EGFR, AGT	94	21	19308	29.3435	0.979018	0.101336	0.0978704		GO:0032930	0.004541	positive regulation of superoxide anion generation
GOTERM_BP_DIRECT	GO:0031638~zymogen activation	3	3.19149	0.00497951	F12, KLKB1, HGFAC	94	22	19308	28.0097	0.985566	0.108272	0.10457		GO:0031638	0.00497951	zymogen activation
GOTERM_BP_DIRECT	GO:0034622~cellular macromolecular complex assembly	3	3.19149	0.00543673	FGB, FGA, FGG	94	23	19308	26.7919	0.990229	0.115259	0.111317		GO:0034622	0.00543673	cellular macromolecular complex assembly
GOTERM_BP_DIRECT	GO:0045921~positive regulation of exocytosis	3	3.19149	0.00640657	FGB, FGA, FGG	94	25	19308	24.6485	0.995732	0.132507	0.127975		GO:0045921	0.00640657	positive regulation of exocytosis
GOTERM_CC_DIRECT	GO:0034364~high-density lipoprotein particle	3	3.19149	0.00659954	APOH, APOA2, APOA4	94	27	20562	24.305	0.6734	0.0619623	0.0564627		GO:0034364	0.00659954	high-density lipoprotein particle
GOTERM_BP_DIRECT	GO:1902042~negative regulation of extrinsic apoptotic signaling pathway via death domain receptors	3	3.19149	0.00799708	FGB, FGA, FGG	94	28	19308	22.0076	0.998905	0.154883	0.149587		GO:1902042	0.00799708	negative regulation of extrinsic apoptotic signaling pathway via death domain receptors
GOTERM_BP_DIRECT	GO:0008203~cholesterol metabolic process	4	4.25532	0.0080364	NSDHL, APOA2, ANGPTL3, APOA4	94	85	19308	9.66608	0.998941	0.154883	0.149587		GO:0008203	0.0080364	cholesterol metabolic process
GOTERM_BP_DIRECT	GO:0001503~ossification	4	4.25532	0.0080364	COL1A1, ECM1, AHSG, EGFR	94	85	19308	9.66608	0.998941	0.154883	0.149587		GO:0001503	0.0080364	ossification
GOTERM_CC_DIRECT	GO:0005584~collagen type I trimer	2	2.12766	0.00902557	COL1A1, COL1A2	94	2	20562	218.745	0.78395	0.0762661	0.0694969		GO:0005584	0.00902557	collagen type I trimer
GOTERM_CC_DIRECT	GO:0005601~classical-complement-pathway C3/C5 convertase complex	2	2.12766	0.00902557	CFB, C2	94	2	20562	218.745	0.78395	0.0762661	0.0694969		GO:0005601	0.00902557	classical-complement-pathway C3/C5 convertase complex
GOTERM_BP_DIRECT	GO:0002542~Factor XII activation	2	2.12766	0.00961036	F12, KLKB1	94	2	19308	205.404	0.999725	0.181102	0.174909		GO:0002542	0.00961036	Factor XII activation
GOTERM_BP_DIRECT	GO:0006810~transport	3	3.19149	0.0103635	ALB, AFM, GC	94	32	19308	19.2566	0.999856	0.191049	0.184516		GO:0006810	0.0103635	transport
GOTERM_BP_DIRECT	GO:2000352~negative regulation of endothelial cell apoptotic process	3	3.19149	0.0130005	FGB, FGA, FGG	94	36	19308	17.117	0.999985	0.234525	0.226504		GO:2000352	0.0130005	negative regulation of endothelial cell apoptotic process
GOTERM_BP_DIRECT	GO:0042060~wound healing	4	4.25532	0.0135259	COL1A1, MACF1, COL3A1, EGFR	94	103	19308	7.97686	0.99999	0.234525	0.226504		GO:0042060	0.0135259	wound healing
GOTERM_BP_DIRECT	GO:0042493~response to drug	6	6.38298	0.0136712	COL1A1, COL18A1, CPB2, APOA2, CTPS1, B2M	94	293	19308	4.20623	0.999992	0.234525	0.226504		GO:0042493	0.0136712	response to drug
GOTERM_BP_DIRECT	GO:0034756~regulation of iron ion transport	2	2.12766	0.0143812	TF, B2M	94	3	19308	136.936	0.999995	0.234525	0.226504		GO:0034756	0.0143812	regulation of iron ion transport
GOTERM_BP_DIRECT	GO:0002034~regulation of blood vessel diameter by renin-angiotensin	2	2.12766	0.0143812	SERPINF2, AGT	94	3	19308	136.936	0.999995	0.234525	0.226504		GO:0002034	0.0143812	regulation of blood vessel diameter by renin-angiotensin
GOTERM_BP_DIRECT	GO:0051788~response to misfolded protein	2	2.12766	0.0143812	F12, CLU	94	3	19308	136.936	0.999995	0.234525	0.226504		GO:0051788	0.0143812	response to misfolded protein
GOTERM_CC_DIRECT	GO:0034774~secretory granule lumen	4	4.25532	0.015361	CFD, C3, TF, AHSG	94	115	20562	7.60851	0.926917	0.12362	0.112647		GO:0034774	0.015361	secretory granule lumen
GOTERM_BP_DIRECT	GO:0061844~antimicrobial humoral immune response mediated by antimicrobial peptide	4	4.25532	0.0157292	REG3G, HRG, B2M, KNG1	94	109	19308	7.53777	0.999999	0.251667	0.24306		GO:0061844	0.0157292	antimicrobial humoral immune response mediated by antimicrobial peptide
GOTERM_BP_DIRECT	GO:0042311~vasodilation	3	3.19149	0.0166605	KNG1, EGFR, AGT	94	41	19308	15.0296	0.999999	0.261632	0.252685		GO:0042311	0.0166605	vasodilation
GOTERM_BP_DIRECT	GO:0055072~iron ion homeostasis	3	3.19149	0.0174394	TF, B2M, CP	94	42	19308	14.6717	1	0.267793	0.258635		GO:0055072	0.0174394	iron ion homeostasis
GOTERM_BP_DIRECT	GO:0007155~cell adhesion	8	8.51064	0.0176845	FGB, COL1A1, VTN, COL18A1, AZGP1, AMBP, DPT, COL8A1	94	555	19308	2.96078	1	0.267793	0.258635		GO:0007155	0.0176845	cell adhesion
GOTERM_BP_DIRECT	GO:1900026~positive regulation of substrate adhesion-dependent cell spreading	3	3.19149	0.0190426	FGB, FGA, FGG	94	44	19308	14.0048	1	0.2833	0.273611		GO:1900026	0.0190426	positive regulation of substrate adhesion-dependent cell spreading
GOTERM_BP_DIRECT	GO:0070527~platelet aggregation	3	3.19149	0.0198666	FGB, FGA, FGG	94	45	19308	13.6936	1	0.290463	0.28053		GO:0070527	0.0198666	platelet aggregation
GOTERM_MF_DIRECT	GO:0005543~phospholipid binding	4	4.25532	0.0215105	F10, APOH, APOA2, APOA4	94	120	18869	6.69113	0.990262	0.270779	0.25686		GO:0005543	0.0215105	phospholipid binding
GOTERM_BP_DIRECT	GO:0050821~protein stabilization	5	5.31915	0.0217895	APOA2, AFM, PFN1, CLU, CPN2	94	220	19308	4.66828	1	0.313178	0.302468		GO:0050821	0.0217895	protein stabilization
GOTERM_BP_DIRECT	GO:0016525~negative regulation of angiogenesis	4	4.25532	0.0230102	SERPINF1, APOH, HRG, AGT	94	126	19308	6.52077	1	0.321094	0.310113		GO:0016525	0.0230102	negative regulation of angiogenesis
GOTERM_BP_DIRECT	GO:0051180~vitamin transport	2	2.12766	0.0238548	AFM, GC	94	5	19308	82.1617	1	0.321094	0.310113		GO:0051180	0.0238548	vitamin transport
GOTERM_BP_DIRECT	GO:0030300~regulation of intestinal cholesterol absorption	2	2.12766	0.0238548	APOA2, APOA4	94	5	19308	82.1617	1	0.321094	0.310113		GO:0030300	0.0238548	regulation of intestinal cholesterol absorption
GOTERM_BP_DIRECT	GO:0003331~positive regulation of extracellular matrix constituent secretion	2	2.12766	0.0238548	CPB2, AGT	94	5	19308	82.1617	1	0.321094	0.310113		GO:0003331	0.0238548	positive regulation of extracellular matrix constituent secretion
GOTERM_BP_DIRECT	GO:0050830~defense response to Gram-positive bacterium	4	4.25532	0.0244555	CRP, RNASE4, REG3G, B2M	94	129	19308	6.36912	1	0.323458	0.312396		GO:0050830	0.0244555	defense response to Gram-positive bacterium
GOTERM_BP_DIRECT	GO:0070374~positive regulation of ERK1 and ERK2 cascade	5	5.31915	0.0247933	FGB, FGA, SERPINF2, FGG, EGFR	94	229	19308	4.48481	1	0.323458	0.312396		GO:0070374	0.0247933	positive regulation of ERK1 and ERK2 cascade
GOTERM_BP_DIRECT	GO:0050714~positive regulation of protein secretion	3	3.19149	0.0260389	FGB, FGA, FGG	94	52	19308	11.8502	1	0.334561	0.32312		GO:0050714	0.0260389	positive regulation of protein secretion
GOTERM_BP_DIRECT	GO:0001501~skeletal system development	4	4.25532	0.0280148	COL1A1, COL3A1, COL1A2, AHSG	94	136	19308	6.0413	1	0.354575	0.342449		GO:0001501	0.0280148	skeletal system development
GOTERM_BP_DIRECT	GO:0043152~induction of bacterial agglutination	2	2.12766	0.0285578	FGB, FGA	94	6	19308	68.4681	1	0.356133	0.343954		GO:0043152	0.0285578	induction of bacterial agglutination
GOTERM_MF_DIRECT	GO:0060228~phosphatidylcholine-sterol O-acyltransferase activator activity	2	2.12766	0.0292141	APOA2, APOA4	94	6	18869	66.9113	0.998192	0.347324	0.329471		GO:0060228	0.0292141	phosphatidylcholine-sterol O-acyltransferase activator activity
GOTERM_BP_DIRECT	GO:0006955~immune response	7	7.44681	0.0315625	C3, VTN, AZGP1, IL1RAP, C8B, B2M, C8A	94	492	19308	2.92242	1	0.386016	0.372815		GO:0006955	0.0315625	immune response
GOTERM_BP_DIRECT	GO:0006879~cellular iron ion homeostasis	3	3.19149	0.0318646	HPX, TF, CP	94	58	19308	10.6244	1	0.386016	0.372815		GO:0006879	0.0318646	cellular iron ion homeostasis
GOTERM_BP_DIRECT	GO:0050996~positive regulation of lipid catabolic process	2	2.12766	0.0332384	APOA2, ANGPTL3	94	7	19308	58.6869	1	0.38989	0.376556		GO:0050996	0.0332384	positive regulation of lipid catabolic process
GOTERM_BP_DIRECT	GO:0071281~cellular response to iron ion	2	2.12766	0.0332384	TF, B2M	94	7	19308	58.6869	1	0.38989	0.376556		GO:0071281	0.0332384	cellular response to iron ion
GOTERM_BP_DIRECT	GO:0001525~angiogenesis	5	5.31915	0.0335636	COL18A1, ECM1, ANGPTL3, COL8A1, HRG	94	252	19308	4.07548	1	0.38989	0.376556		GO:0001525	0.0335636	angiogenesis
GOTERM_CC_DIRECT	GO:0034366~spherical high-density lipoprotein particle	2	2.12766	0.0356216	APOA2, CLU	94	8	20562	54.6862	0.997823	0.261741	0.23851		GO:0034366	0.0356216	spherical high-density lipoprotein particle
GOTERM_CC_DIRECT	GO:1990712~HFE-transferrin receptor complex	2	2.12766	0.0356216	TF, B2M	94	8	20562	54.6862	0.997823	0.261741	0.23851		GO:1990712	0.0356216	HFE-transferrin receptor complex
GOTERM_BP_DIRECT	GO:0065003~macromolecular complex assembly	4	4.25532	0.0371276	FGB, FGA, FGG, IL1RAP	94	152	19308	5.40538	1	0.406789	0.392878		GO:0065003	0.0371276	macromolecular complex assembly
GOTERM_BP_DIRECT	GO:0010757~negative regulation of plasminogen activation	2	2.12766	0.0378966	CPB2, SERPINF2	94	8	19308	51.3511	1	0.406789	0.392878		GO:0010757	0.0378966	negative regulation of plasminogen activation
GOTERM_BP_DIRECT	GO:0008228~opsonization	2	2.12766	0.0378966	C4B, CRP	94	8	19308	51.3511	1	0.406789	0.392878		GO:0008228	0.0378966	opsonization
GOTERM_BP_DIRECT	GO:0007597~blood coagulation, intrinsic pathway	2	2.12766	0.0378966	F12, APOH	94	8	19308	51.3511	1	0.406789	0.392878		GO:0007597	0.0378966	blood coagulation, intrinsic pathway
GOTERM_BP_DIRECT	GO:1900121~negative regulation of receptor binding	2	2.12766	0.0378966	ADIPOQ, B2M	94	8	19308	51.3511	1	0.406789	0.392878		GO:1900121	0.0378966	negative regulation of receptor binding
GOTERM_BP_DIRECT	GO:0015886~heme transport	2	2.12766	0.0378966	HPX, HRG	94	8	19308	51.3511	1	0.406789	0.392878		GO:0015886	0.0378966	heme transport
GOTERM_CC_DIRECT	GO:0042824~MHC class I peptide loading complex	2	2.12766	0.0399851	ABCB9, B2M	94	9	20562	48.6099	0.998988	0.270299	0.246308		GO:0042824	0.0399851	MHC class I peptide loading complex
GOTERM_CC_DIRECT	GO:0031232~extrinsic component of external side of plasma membrane	2	2.12766	0.0399851	TF, PLG	94	9	20562	48.6099	0.998988	0.270299	0.246308		GO:0031232	0.0399851	extrinsic component of external side of plasma membrane
GOTERM_BP_DIRECT	GO:0042698~ovulation cycle	2	2.12766	0.0425327	SERPINF1, EGFR	94	9	19308	45.6454	1	0.450846	0.435428		GO:0042698	0.0425327	ovulation cycle
GOTERM_MF_DIRECT	GO:0005178~integrin binding	4	4.25532	0.0453347	VTN, COL3A1, ANGPTL3, EGFR	94	161	18869	4.98718	0.999949	0.500227	0.474515		GO:0005178	0.0453347	integrin binding
GOTERM_MF_DIRECT	GO:0050839~cell adhesion molecule binding	3	3.19149	0.0467502	FGB, FGA, FGG	94	70	18869	8.60289	0.999963	0.500227	0.474515		GO:0050839	0.0467502	cell adhesion molecule binding
GOTERM_BP_DIRECT	GO:0051006~positive regulation of lipoprotein lipase activity	2	2.12766	0.0471466	APOH, APOA4	94	10	19308	41.0809	1	0.493584	0.476705		GO:0051006	0.0471466	positive regulation of lipoprotein lipase activity
GOTERM_BP_DIRECT	GO:0006954~inflammatory response	6	6.38298	0.0489053	C4B, CRP, C3, ECM1, IL1RAP, KNG1	94	412	19308	2.99132	1	0.505752	0.488456		GO:0006954	0.0489053	inflammatory response
GOTERM_CC_DIRECT	GO:0005769~early endosome	5	5.31915	0.0511812	TF, VPS8, APOA2, ANGPTL3, APOA4	94	308	20562	3.55105	0.999861	0.332678	0.30315		GO:0005769	0.0511812	early endosome
GOTERM_BP_DIRECT	GO:0019885~antigen processing and presentation of endogenous peptide antigen via MHC class I	2	2.12766	0.0517385	ABCB9, B2M	94	11	19308	37.3462	1	0.524775	0.506829		GO:0019885	0.0517385	antigen processing and presentation of endogenous peptide antigen via MHC class I
GOTERM_BP_DIRECT	GO:0007584~response to nutrient	3	3.19149	0.0519825	SERPINC1, ADIPOQ, C2	94	76	19308	8.10806	1	0.524775	0.506829		GO:0007584	0.0519825	response to nutrient
GOTERM_BP_DIRECT	GO:0034380~high-density lipoprotein particle assembly	2	2.12766	0.0563086	APOA2, APOA4	94	12	19308	34.234	1	0.536513	0.518166		GO:0034380	0.0563086	high-density lipoprotein particle assembly
GOTERM_BP_DIRECT	GO:0033700~phospholipid efflux	2	2.12766	0.0563086	APOA2, APOA4	94	12	19308	34.234	1	0.536513	0.518166		GO:0033700	0.0563086	phospholipid efflux
GOTERM_BP_DIRECT	GO:0051838~cytolysis by host of symbiont cells	2	2.12766	0.0563086	REG3G, HRG	94	12	19308	34.234	1	0.536513	0.518166		GO:0051838	0.0563086	cytolysis by host of symbiont cells
GOTERM_BP_DIRECT	GO:0043589~skin morphogenesis	2	2.12766	0.0563086	COL1A1, COL1A2	94	12	19308	34.234	1	0.536513	0.518166		GO:0043589	0.0563086	skin morphogenesis
GOTERM_BP_DIRECT	GO:0046425~regulation of JAK-STAT cascade	2	2.12766	0.0563086	MST1, ELP2	94	12	19308	34.234	1	0.536513	0.518166		GO:0046425	0.0563086	regulation of JAK-STAT cascade
GOTERM_CC_DIRECT	GO:0005886~plasma membrane	31	32.9787	0.0597117	MACF1, ITIH4, PHLDB1, SERPINC1, GRIK5, PROS1, PLG, IL1RAP, C8B, C8A, EGFR, KNG1, C3, C4B, C6, C9, B2M, FGB, FGA, AMBP, F10, YIPF3, F12, FGG, CP, MYO1E, TF, TMX3, HRG, KLKB1, CFB	94	5071	20562	1.33723	0.99997	0.373751	0.340578		GO:0005886	0.0597117	plasma membrane
GOTERM_BP_DIRECT	GO:0010745~negative regulation of macrophage derived foam cell differentiation	2	2.12766	0.0608569	CRP, ADIPOQ	94	13	19308	31.6007	1	0.567106	0.547712		GO:0010745	0.0608569	negative regulation of macrophage derived foam cell differentiation
GOTERM_BP_DIRECT	GO:0019430~removal of superoxide radicals	2	2.12766	0.0608569	APOA4, SOD3	94	13	19308	31.6007	1	0.567106	0.547712		GO:0019430	0.0608569	removal of superoxide radicals
GOTERM_BP_DIRECT	GO:0071333~cellular response to glucose stimulus	3	3.19149	0.0646585	CPB2, GRIK5, SERPINF1	94	86	19308	7.16526	1	0.595209	0.574854		GO:0071333	0.0646585	cellular response to glucose stimulus
GOTERM_MF_DIRECT	GO:0005198~structural molecule activity	4	4.25532	0.0651097	FGB, FGA, MACF1, FGG	94	187	18869	4.29378	0.999999	0.663498	0.629393		GO:0005198	0.0651097	structural molecule activity
GOTERM_BP_DIRECT	GO:0050777~negative regulation of immune response	2	2.12766	0.0653834	COL3A1, AMBP	94	14	19308	29.3435	1	0.595209	0.574854		GO:0050777	0.0653834	negative regulation of immune response
GOTERM_BP_DIRECT	GO:0071260~cellular response to mechanical stimulus	3	3.19149	0.0659783	COL1A1, EGFR, AGT	94	87	19308	7.08291	1	0.595209	0.574854		GO:0071260	0.0659783	cellular response to mechanical stimulus
GOTERM_CC_DIRECT	GO:0005604~basement membrane	3	3.19149	0.0689459	VTN, COL18A1, SERPINF1	94	95	20562	6.90773	0.999994	0.416138	0.379203		GO:0005604	0.0689459	basement membrane
GOTERM_BP_DIRECT	GO:0008285~negative regulation of cell proliferation	6	6.38298	0.0734586	COL18A1, AZGP1, IGFBP3, DPT, PLG, HRG	94	464	19308	2.65609	1	0.65018	0.627945		GO:0008285	0.0734586	negative regulation of cell proliferation
GOTERM_BP_DIRECT	GO:0034375~high-density lipoprotein particle remodeling	2	2.12766	0.0743719	APOA2, APOA4	94	16	19308	25.6755	1	0.65018	0.627945		GO:0034375	0.0743719	high-density lipoprotein particle remodeling
GOTERM_BP_DIRECT	GO:0034374~low-density lipoprotein particle remodeling	2	2.12766	0.0743719	APOA2, AGT	94	16	19308	25.6755	1	0.65018	0.627945		GO:0034374	0.0743719	low-density lipoprotein particle remodeling
GOTERM_BP_DIRECT	GO:0050731~positive regulation of peptidyl-tyrosine phosphorylation	3	3.19149	0.0768524	VTN, ADIPOQ, AGT	94	95	19308	6.48645	1	0.661894	0.639259		GO:0050731	0.0768524	positive regulation of peptidyl-tyrosine phosphorylation
GOTERM_BP_DIRECT	GO:0030194~positive regulation of blood coagulation	2	2.12766	0.0788341	F12, APOH	94	17	19308	24.1652	1	0.661894	0.639259		GO:0030194	0.0788341	positive regulation of blood coagulation
GOTERM_BP_DIRECT	GO:0030502~negative regulation of bone mineralization	2	2.12766	0.0788341	ECM1, AHSG	94	17	19308	24.1652	1	0.661894	0.639259		GO:0030502	0.0788341	negative regulation of bone mineralization
GOTERM_BP_DIRECT	GO:0009395~phospholipid catabolic process	2	2.12766	0.0788341	APOA2, ANGPTL3	94	17	19308	24.1652	1	0.661894	0.639259		GO:0009395	0.0788341	phospholipid catabolic process
GOTERM_BP_DIRECT	GO:0045721~negative regulation of gluconeogenesis	2	2.12766	0.0876946	MST1, ADIPOQ	94	19	19308	21.6215	1	0.72199	0.6973		GO:0045721	0.0876946	negative regulation of gluconeogenesis
GOTERM_BP_DIRECT	GO:0010812~negative regulation of cell-substrate adhesion	2	2.12766	0.0876946	COL1A1, PLG	94	19	19308	21.6215	1	0.72199	0.6973		GO:0010812	0.0876946	negative regulation of cell-substrate adhesion
GOTERM_MF_DIRECT	GO:0043395~heparan sulfate proteoglycan binding	2	2.12766	0.0896463	CFH, HRG	94	19	18869	21.1299	1	0.872014	0.827191		GO:0043395	0.0896463	heparan sulfate proteoglycan binding
GOTERM_BP_DIRECT	GO:0042632~cholesterol homeostasis	3	3.19149	0.0897051	APOA2, ANGPTL3, APOA4	94	104	19308	5.92512	1	0.72986	0.7049		GO:0042632	0.0897051	cholesterol homeostasis
GOTERM_BP_DIRECT	GO:0060716~labyrinthine layer blood vessel development	2	2.12766	0.0920932	NSDHL, PLG	94	20	19308	20.5404	1	0.72986	0.7049		GO:0060716	0.0920932	labyrinthine layer blood vessel development
GOTERM_BP_DIRECT	GO:0090501~RNA phosphodiester bond hydrolysis	2	2.12766	0.0920932	AZGP1, RNASE4	94	20	19308	20.5404	1	0.72986	0.7049		GO:0090501	0.0920932	RNA phosphodiester bond hydrolysis
GOTERM_BP_DIRECT	GO:0042310~vasoconstriction	2	2.12766	0.0920932	CRP, AGT	94	20	19308	20.5404	1	0.72986	0.7049		GO:0042310	0.0920932	vasoconstriction
GOTERM_MF_DIRECT	GO:0016209~antioxidant activity	2	2.12766	0.0986072	ALB, APOA4	94	21	18869	19.1175	1	0.917476	0.870316		GO:0016209	0.0986072	antioxidant activity

## Sheet: KStudy2_UrineStudy2_down
Rivigo GO reduction	Kidney - Urine study 2 - proteomics downregulated
Category	GO	Term	Count	%	PValue	Genes	List Total	Pop Hits	Pop Total	Fold Enrichment	Bonferroni	Benjamini	FDR		GO	PValue
GOTERM_CC_DIRECT	GO:0005576	extracellular region	71	75.5319	1.33266e-49	COL18A1, ECM1, SERPINA1, PROS1, IL1RAP, C8B, SERPINA6, CLU, C8A, SERPINA4, C4B, B2M, HGFAC, FGB, FGA, AHSG, IGFBP3, SERPINF1, MST1, ADIPOQ, FGG, SERPINF2, APOA2, RNASE4, APOA4, AZGP1, SELENOP, ANGPTL3, COL8A1, SERPING1, FETUB, MASP2, CFB, CFD, CRP, ITIH4, CPB2, ITIH3, ITIH2, CFH, SERPINC1, CFI, AFM, PLG, REG3G, ITIH1, CPN2, KNG1, C2, C3, VTN, HPX, C6, APOH, C9, GC, AMBP, SERPIND1, F10, LUM, F12, …	94	2129	20562	7.29491	2.25219e-47	2.25219e-47	2.05229e-47		GO:0005576	1.33266e-49
GOTERM_CC_DIRECT	GO:0072562	blood microparticle	34	36.1702	2.24831e-48	ITIH4, ITIH2, CFH, SERPINC1, PROS1, AFM, PLG, ITIH1, C8A, CLU, CPN2, KNG1, C3, C4B, VTN, HPX, C9, GC, FGB, FGA, AMBP, AHSG, FGG, SERPINF2, APOA2, APOA4, CP, AGT, TF, ALB, SERPING1, HRG, PFN1, CFB	94	145	20562	51.2919	3.79964e-46	1.89982e-46	1.7312e-46		GO:0072562	2.24831e-48
GOTERM_CC_DIRECT	GO:0005615	extracellular space	66	70.2128	2.50055e-45	COL18A1, ECM1, SERPINA1, PROS1, SERPINA10, C8B, SERPINA6, CLU, C8A, SERPINA4, C4B, B2M, HGFAC, FGB, FGA, AHSG, IGFBP3, SERPINF1, MST1, ADIPOQ, FGG, SERPINF2, RNASE4, APOA4, AZGP1, ANGPTL3, COL8A1, SERPING1, FETUB, MASP2, CFB, CFD, CRP, CPB2, CFH, SERPINC1, CFI, AFM, DPT, PLG, REG3G, EGFR, CPN2, KNG1, C2, C3, VTN, HPX, C6, APOH, C9, GC, AMBP, SERPIND1, F10, LUM, F12, CP, SOD3, AGT, COL1A1, COL3A1,…	94	1938	20562	7.44951	4.22593e-43	1.40864e-43	1.28362e-43		GO:0005615	2.50055e-45
GOTERM_CC_DIRECT	GO:0070062	extracellular exosome	63	67.0213	7.22642e-38	COL18A1, ECM1, SERPINA1, PROS1, SERPINA10, C8B, SERPINA6, CLU, C8A, SERPINA4, C4B, B2M, FGB, FGA, AHSG, SERPINF1, FGG, SERPINF2, APOA2, APOA4, AZGP1, SELENOP, SERPING1, FETUB, MASP2, PFN1, CFB, CFD, ITIH4, MTMR2, CPB2, ITIH3, ITIH2, CFH, SERPINC1, CFI, AFM, PLG, ITIH1, CST6, CPN2, KNG1, C2, C3, VTN, HPX, C6, APOH, C9, GC, AMBP, SERPIND1, LUM, F12, CP, SOD3, AGT, MYO1E, TF, COL1A2, ALB, HRG, KLKB1	94	2218	20562	6.21322	1.22127e-35	3.05316e-36	2.78217e-36		GO:0070062	7.22642e-38
GOTERM_BP_DIRECT	GO:0010951	negative regulation of endopeptidase activity	25	26.5957	1.17687e-30	ITIH4, ITIH3, SERPINA1, ITIH2, SERPINC1, PROS1, SERPINA10, SERPINA6, ITIH1, CST6, SERPINA4, KNG1, C3, C4B, VTN, AMBP, SERPIND1, AHSG, SERPINF1, SERPINF2, AGT, SERPING1, UBE2O, FETUB, HRG	94	146	19308	35.172	9.99161e-28	9.97984e-28	9.63855e-28		GO:0010951	1.17687e-30
GOTERM_CC_DIRECT	GO:0005788	endoplasmic reticulum lumen	24	25.5319	5.7288e-22	FGA, COL18A1, SERPINA1, ITIH2, SERPIND1, F10, AHSG, SERPINC1, IGFBP3, SERPINA10, FGG, APOA2, APOA4, CP, KNG1, C3, COL1A1, COL3A1, TF, COL1A2, ALB, SERPING1, COL8A1, B2M	94	306	20562	17.1564	9.68167e-20	1.93633e-20	1.76447e-20		GO:0005788	5.7288e-22
GOTERM_BP_DIRECT	GO:0042730	fibrinolysis	11	11.7021	3.62661e-19	FGB, FGA, CPB2, F12, PROS1, SERPINF2, FGG, SERPING1, PLG, HRG, KLKB1	94	19	19308	118.918	3.07899e-16	1.53768e-16	1.4851e-16		GO:0042730	3.62661e-19
GOTERM_MF_DIRECT	GO:0004867	serine-type endopeptidase inhibitor activity	16	17.0213	2.12606e-18	ITIH4, ITIH3, SERPINA1, ITIH2, AMBP, SERPIND1, SERPINC1, SERPINF1, SERPINF2, SERPINA10, SERPINA6, ITIH1, SERPINA4, AGT, SERPING1, HRG	94	103	18869	31.182	4.52851e-16	4.54977e-16	4.31591e-16		GO:0004867	2.12606e-18
GOTERM_CC_DIRECT	GO:0031093	platelet alpha granule lumen	14	14.8936	2.83838e-18	FGB, CFD, FGA, SERPINA1, AHSG, PROS1, SERPINF2, FGG, PLG, CLU, KNG1, ALB, SERPING1, HRG	94	67	20562	45.7078	4.79687e-16	7.99478e-17	7.28518e-17		GO:0031093	2.83838e-18
GOTERM_BP_DIRECT	GO:0007596	blood coagulation	15	15.9574	6.15985e-18	FGB, FGA, CPB2, SERPINA1, SERPIND1, F10, SERPINC1, F12, PROS1, SERPINA10, PLG, KNG1, SERPING1, KLKB1, HGFAC	94	88	19308	35.0121	5.22971e-15	1.74118e-15	1.68164e-15		GO:0007596	6.15985e-18
GOTERM_BP_DIRECT	GO:0006956	complement activation	11	11.7021	1.25048e-17	C4B, CFD, C3, C6, CFH, C9, C8B, CLU, C8A, CFB, C2	94	25	19308	90.3779	1.06166e-14	2.65102e-15	2.56036e-15		GO:0006956	1.25048e-17
GOTERM_MF_DIRECT	GO:0004866	endopeptidase inhibitor activity	12	12.766	1.97851e-16	C4B, C3, ITIH4, ITIH3, ITIH2, SERPIND1, AHSG, PROS1, SERPINF2, FETUB, HRG, KNG1	94	45	18869	53.5291	4.72955e-14	2.117e-14	2.00819e-14		GO:0004866	1.97851e-16
GOTERM_MF_DIRECT	GO:0005201	extracellular matrix structural constituent	13	13.8298	3.625e-12	FGB, FGA, COL18A1, ECM1, LUM, ADIPOQ, FGG, DPT, COL1A1, VTN, COL3A1, COL1A2, COL8A1	94	138	18869	18.9097	7.72123e-10	2.58583e-10	2.45291e-10		GO:0005201	3.625e-12
GOTERM_BP_DIRECT	GO:0006958	complement activation, classical pathway	12	12.766	1.90886e-11	C4B, CRP, C3, C6, C9, CFI, SERPING1, MASP2, C8B, CLU, C8A, C2	94	124	19308	19.8778	1.62062e-08	3.23743e-09	3.12672e-09		GO:0006958	1.90886e-11
GOTERM_BP_DIRECT	GO:0006957	complement activation, alternative pathway	7	7.44681	1.25728e-10	CFD, C3, CFH, C9, C8B, C8A, CFB	94	17	19308	84.5782	1.06743e-07	1.77696e-08	1.71619e-08		GO:0006957	1.25728e-10
GOTERM_BP_DIRECT	GO:0051918	negative regulation of fibrinolysis	6	6.38298	2.90295e-09	VTN, CPB2, APOH, SERPINF2, PLG, HRG	94	13	19308	94.802	2.46461e-06	3.51672e-07	3.39646e-07		GO:0051918	2.90295e-09
GOTERM_CC_DIRECT	GO:0031089	platelet dense granule lumen	6	6.38298	3.291e-09	ITIH4, ITIH3, ECM1, APOH, SELENOP, SERPINA4	94	14	20562	93.7477	5.56179e-07	7.94542e-08	7.24021e-08		GO:0031089	3.291e-09
GOTERM_MF_DIRECT	GO:0004252	serine-type endopeptidase activity	11	11.7021	3.84167e-08	CFD, F10, F12, CFI, MST1, MASP2, PLG, KLKB1, CFB, HGFAC, C2	94	193	18869	11.4408	8.18272e-06	2.05529e-06	1.94965e-06		GO:0004252	3.84167e-08
GOTERM_BP_DIRECT	GO:0031639	plasminogen activation	5	5.31915	1.6219e-07	FGB, FGA, APOH, FGG, KLKB1	94	11	19308	93.3656	0.00013769	1.71922e-05	1.66042e-05		GO:0031639	1.6219e-07
GOTERM_CC_DIRECT	GO:0009986	cell surface	16	17.0213	1.71458e-07	FGB, FGA, AMBP, SERPINF2, ADIPOQ, FGG, APOA4, PLG, CLU, EGFR, C3, TF, TMX3, APOH, ANGPTL3, HRG	94	639	20562	5.47718	2.89759e-05	3.62204e-06	3.30056e-06		GO:0009986	1.71458e-07
GOTERM_MF_DIRECT	GO:0008201	heparin binding	10	10.6383	2.13824e-07	VTN, CFH, SERPIND1, SERPINC1, APOH, SERPINA10, ANGPTL3, HRG, SOD3, KNG1	94	176	18869	11.4053	4.55435e-05	9.15167e-06	8.68126e-06		GO:0008201	2.13824e-07
GOTERM_BP_DIRECT	GO:0006508	proteolysis	13	13.8298	6.16336e-07	CFD, CPB2, CFH, F10, F12, CFI, MST1, PLG, C2, MASP2, KLKB1, HGFAC, CFB	94	409	19308	6.52874	0.000523132	5.80725e-05	5.60866e-05		GO:0006508	6.16336e-07
GOTERM_MF_DIRECT	GO:0004869	cysteine-type endopeptidase inhibitor activity	6	6.38298	6.48432e-07	AHSG, UBE2O, FETUB, HRG, CST6, KNG1	94	34	18869	35.4237	0.000138107	2.31274e-05	2.19386e-05		GO:0004869	6.48432e-07
GOTERM_BP_DIRECT	GO:0006953	acute-phase response	6	6.38298	1.71851e-06	CRP, ITIH4, SERPINA1, AHSG, SERPINF2, REG3G	94	42	19308	29.3435	0.00145796	0.00014573	0.000140746		GO:0006953	1.71851e-06
GOTERM_CC_DIRECT	GO:0005579	membrane attack complex	4	4.25532	3.09411e-06	C6, C9, C8B, C8A	94	7	20562	124.997	0.000522769	5.81006e-05	5.29437e-05		GO:0005579	3.09411e-06
GOTERM_MF_DIRECT	GO:0005102	receptor binding	12	12.766	4.04735e-06	FGB, C3, FGA, MST1, ADIPOQ, FGG, APOA2, ANGPTL3, PLG, HRG, CLU, KNG1	94	397	18869	6.06753	0.000861716	0.000123733	0.000117373		GO:0005102	4.04735e-06
GOTERM_BP_DIRECT	GO:0048260	positive regulation of receptor-mediated endocytosis	5	5.31915	4.1636e-06	C3, VTN, TF, CLU, B2M	94	23	19308	44.6531	0.00352866	0.000320976	0.000309999		GO:0048260	4.1636e-06
GOTERM_CC_DIRECT	GO:0005577	fibrinogen complex	4	4.25532	4.93434e-06	FGB, FGA, SERPINF2, FGG	94	8	20562	109.372	0.000833558	8.33903e-05	7.59888e-05		GO:0005577	4.93434e-06
GOTERM_BP_DIRECT	GO:0045087	innate immune response	14	14.8936	5.77728e-06	FGB, CRP, FGA, F12, CFI, IL1RAP, C8B, CLU, C8A, C2, C4B, C6, SERPING1, B2M	94	599	19308	4.80077	0.00489292	0.000408261	0.0003943		GO:0045087	5.77728e-06
GOTERM_BP_DIRECT	GO:0030199	collagen fibril organization	6	6.38298	1.03048e-05	COL1A1, COL3A1, COL1A2, LUM, SERPINF2, DPT	94	60	19308	20.5404	0.0087107	0.000672193	0.000649205		GO:0030199	1.03048e-05
GOTERM_MF_DIRECT	GO:0002020	protease binding	7	7.44681	1.81944e-05	COL1A1, COL3A1, ECM1, SERPINA1, COL1A2, SERPINC1, SERPINF2	94	111	18869	12.6589	0.00386794	0.0004867	0.000461683		GO:0002020	1.81944e-05
GOTERM_BP_DIRECT	GO:0030212	hyaluronan metabolic process	4	4.25532	2.30627e-05	ITIH4, ITIH3, ITIH2, ITIH1	94	12	19308	68.4681	0.01939	0.00139694	0.00134917		GO:0030212	2.30627e-05
GOTERM_CC_DIRECT	GO:0031012	extracellular matrix	9	9.57447	2.36472e-05	COL1A1, COL18A1, COL3A1, ECM1, COL1A2, AHSG, LUM, COL8A1, CPN2	94	260	20562	7.57193	0.00398845	0.000363307	0.000331061		GO:0031012	2.36472e-05
GOTERM_BP_DIRECT	GO:0030195	negative regulation of blood coagulation	4	4.25532	3.78924e-05	VTN, PROS1, APOH, KNG1	94	14	19308	58.6869	0.0316593	0.00214219	0.00206893		GO:0030195	3.78924e-05
GOTERM_BP_DIRECT	GO:0051258	protein polymerization	4	4.25532	4.72003e-05	FGB, FGA, VTN, FGG	94	15	19308	54.7745	0.0392816	0.00250161	0.00241606		GO:0051258	4.72003e-05
GOTERM_MF_DIRECT	GO:0030020	extracellular matrix structural constituent conferring tensile strength	5	5.31915	4.87016e-05	COL1A1, COL18A1, COL3A1, COL1A2, COL8A1	94	41	18869	24.4798	0.0103201	0.00115802	0.00109849		GO:0030020	4.87016e-05
GOTERM_BP_DIRECT	GO:0050778	positive regulation of immune response	4	4.25532	0.000116212	C6, C9, C8B, C8A	94	20	19308	41.0809	0.0939585	0.00579695	0.00559871		GO:0050778	0.000116212
GOTERM_BP_DIRECT	GO:0051919	positive regulation of fibrinolysis	3	3.19149	0.000136847	F12, PLG, KLKB1	94	4	19308	154.053	0.109695	0.00644704	0.00622656		GO:0051919	0.000136847
GOTERM_BP_DIRECT	GO:0019835	cytolysis	4	4.25532	0.000155897	C6, C9, C8B, C8A	94	22	19308	37.3462	0.12398	0.00695791	0.00671997		GO:0019835	0.000155897
GOTERM_BP_DIRECT	GO:0007160	cell-matrix adhesion	6	6.38298	0.000167889	FGB, FGA, VTN, COL3A1, FGG, ANGPTL3	94	107	19308	11.518	0.132855	0.00711848	0.00687504		GO:0007160	0.000167889
GOTERM_BP_DIRECT	GO:0071230	cellular response to amino acid stimulus	5	5.31915	0.000187448	COL1A1, COL3A1, COL1A2, LARS1, EGFR	94	59	19308	17.4071	0.147138	0.00756932	0.00731046		GO:0071230	0.000187448
GOTERM_BP_DIRECT	GO:0030168	platelet activation	5	5.31915	0.000256926	FGB, FGA, COL3A1, FGG, HRG	94	64	19308	16.0472	0.196002	0.00990334	0.00956466		GO:0030168	0.000256926
GOTERM_BP_DIRECT	GO:2000427	positive regulation of apoptotic cell clearance	3	3.19149	0.000339974	C4B, C3, C2	94	6	19308	102.702	0.250753	0.0125347	0.012106		GO:2000427	0.000339974
GOTERM_MF_DIRECT	GO:0001848	complement binding	3	3.19149	0.000355873	C4B, C8A, CFB	94	6	18869	100.367	0.0730119	0.00761569	0.00722423		GO:0001848	0.000355873
GOTERM_BP_DIRECT	GO:0072378	blood coagulation, fibrin clot formation	3	3.19149	0.00047447	FGB, FGA, FGG	94	7	19308	88.0304	0.331635	0.0167646	0.0161913		GO:0072378	0.00047447
GOTERM_BP_DIRECT	GO:1905920	positive regulation of CoA-transferase activity	3	3.19149	0.000630642	APOA2, APOA4, AGT	94	8	19308	77.0266	0.414673	0.0213914	0.0206598		GO:1905920	0.000630642
GOTERM_BP_DIRECT	GO:0045907	positive regulation of vasoconstriction	4	4.25532	0.000807681	FGB, FGA, FGG, EGFR	94	38	19308	21.6215	0.496413	0.0253861	0.0245179		GO:0045907	0.000807681
GOTERM_BP_DIRECT	GO:0010873	positive regulation of cholesterol esterification	3	3.19149	0.000808283	APOA2, APOA4, AGT	94	9	19308	68.4681	0.49667	0.0253861	0.0245179		GO:0010873	0.000808283
GOTERM_CC_DIRECT	GO:0005581	collagen trimer	5	5.31915	0.000808543	COL1A1, COL18A1, COL3A1, COL1A2, ADIPOQ	94	92	20562	11.8883	0.127767	0.011387	0.0103763		GO:0005581	0.000808543
GOTERM_BP_DIRECT	GO:0090277	positive regulation of peptide hormone secretion	3	3.19149	0.00100719	FGB, FGA, FGG	94	10	19308	61.6213	0.574943	0.0295344	0.0285243		GO:0090277	0.00100719
GOTERM_BP_DIRECT	GO:0001895	retina homeostasis	4	4.25532	0.00101002	AZGP1, TF, ALB, B2M	94	41	19308	20.0394	0.575965	0.0295344	0.0285243		GO:0001895	0.00101002
GOTERM_BP_DIRECT	GO:0097421	liver regeneration	4	4.25532	0.00108394	VTN, CPB2, SERPINA10, EGFR	94	42	19308	19.5623	0.601785	0.0306393	0.0295915		GO:0097421	0.00108394
GOTERM_BP_DIRECT	GO:0030198	extracellular matrix organization	6	6.38298	0.00121661	COL1A1, VTN, COL18A1, COL3A1, COL1A2, COL8A1	94	165	19308	7.46925	0.64425	0.0325194	0.0314073		GO:0030198	0.00121661
GOTERM_BP_DIRECT	GO:0030193	regulation of blood coagulation	3	3.19149	0.00122715	APOH, SERPING1, HRG	94	11	19308	56.0193	0.647424	0.0325194	0.0314073		GO:0030193	0.00122715
GOTERM_MF_DIRECT	GO:0048407	platelet-derived growth factor binding	3	3.19149	0.00128407	COL1A1, COL3A1, COL1A2	94	11	18869	54.7456	0.239427	0.024981	0.0236969		GO:0048407	0.00128407
GOTERM_CC_DIRECT	GO:0005796	Golgi lumen	5	5.31915	0.00137004	VTN, F10, LUM, PROS1, SOD3	94	106	20562	10.3181	0.206813	0.0178106	0.0162297		GO:0005796	0.00137004
GOTERM_MF_DIRECT	GO:0042802	identical protein binding	19	20.2128	0.00160291	CRP, COL18A1, MTMR2, SERPINA1, CFH, SERPINC1, GRIK5, ADIPOQ, FGG, APOA4, CTPS1, EGFR, COL1A1, VTN, COL1A2, APOH, ALB, MASP2, B2M	94	1714	18869	2.22517	0.289434	0.0285853	0.0271159		GO:0042802	0.00160291
GOTERM_CC_DIRECT	GO:0042627	chylomicron	3	3.19149	0.00177759	APOH, APOA2, APOA4	94	14	20562	46.8739	0.259685	0.0208625	0.0190108		GO:0042627	0.00177759
GOTERM_CC_DIRECT	GO:0005783	endoplasmic reticulum	14	14.8936	0.00185171	FGB, FGA, SERPINA1, AMBP, GRIK5, ADIPOQ, CLU, VTN, NSDHL, SPTLC1, COL1A2, TMX3, LARS1, ALB	94	1142	20562	2.68163	0.268917	0.0208625	0.0190108		GO:0005783	0.00185171
GOTERM_MF_DIRECT	GO:0051087	chaperone binding	5	5.31915	0.00214354	FGB, ALB, PLG, CLU, CP	94	110	18869	9.12427	0.36686	0.035286	0.0334722		GO:0051087	0.00214354
GOTERM_CC_DIRECT	GO:0031091	platelet alpha granule	3	3.19149	0.00263327	FGB, FGA, FGG	94	17	20562	38.602	0.359566	0.0278139	0.0253452		GO:0031091	0.00263327
GOTERM_BP_DIRECT	GO:0034116	positive regulation of heterotypic cell-cell adhesion	3	3.19149	0.00263577	FGB, FGA, FGG	94	16	19308	38.5133	0.893619	0.0677314	0.0654151		GO:0034116	0.00263577
GOTERM_BP_DIRECT	GO:0009617	response to bacterium	5	5.31915	0.00278895	CFD, C3, ADIPOQ, CFB, C2	94	121	19308	8.48778	0.906625	0.0695598	0.067181		GO:0009617	0.00278895
GOTERM_MF_DIRECT	GO:0008236	serine-type peptidase activity	4	4.25532	0.00308639	CFD, CFI, PLG, HGFAC	94	59	18869	13.6091	0.48233	0.0440324	0.0417691		GO:0008236	0.00308639
GOTERM_MF_DIRECT	GO:0005507	copper ion binding	4	4.25532	0.00308639	ALB, APOA4, SOD3, CP	94	59	18869	13.6091	0.48233	0.0440324	0.0417691		GO:0005507	0.00308639
GOTERM_BP_DIRECT	GO:0051592	response to calcium ion	4	4.25532	0.0033316	FGB, FGA, FGG, EGFR	94	62	19308	13.2519	0.941179	0.0786669	0.0759767		GO:0051592	0.0033316
GOTERM_BP_DIRECT	GO:0043691	reverse cholesterol transport	3	3.19149	0.00333963	APOA2, APOA4, CLU	94	18	19308	34.234	0.94158	0.0786669	0.0759767		GO:0043691	0.00333963
GOTERM_CC_DIRECT	GO:0034361	very-low-density lipoprotein particle	3	3.19149	0.00401856	APOH, APOA2, APOA4	94	21	20562	31.2492	0.493638	0.0399492	0.0364034		GO:0034361	0.00401856
GOTERM_MF_DIRECT	GO:0005515	protein binding	75	79.7872	0.00402095	PHLDB1, ECM1, SERPINA1, PROS1, SERPINA10, CLU, C8A, NSDHL, SPTLC1, B2M, HGFAC, FGB, SRRM2, FGA, IGFBP3, SERPINF1, MST1, ADIPOQ, FGG, SERPINF2, APOA2, APOA4, CTPS1, AZGP1, TMX3, LARS1, COL8A1, SERPING1, FETUB, MASP2, PFN1, CFB, CRP, MACF1, ITIH4, MTMR2, ITIH3, ITIH2, CFH, SERPINC1, CFI, AFM, DPT, PLG, ABCB9, ITIH1, CST6, EGFR, KNG1, C2, C3, VTN, HPX, C6, APOH, C9, VPS8, AMBP, F10, LUM, YIPF3, F12,…	94	12554	18869	1.19922	0.576071	0.0537803	0.0510158		GO:0005515	0.00402095
GOTERM_BP_DIRECT	GO:0006826	iron ion transport	3	3.19149	0.00412139	TF, B2M, CP	94	20	19308	30.8106	0.969992	0.0944578	0.0912275		GO:0006826	0.00412139
GOTERM_BP_DIRECT	GO:0032930	positive regulation of superoxide anion generation	3	3.19149	0.004541	CRP, EGFR, AGT	94	21	19308	29.3435	0.979018	0.101336	0.0978704		GO:0032930	0.004541
GOTERM_BP_DIRECT	GO:0031638	zymogen activation	3	3.19149	0.00497951	F12, KLKB1, HGFAC	94	22	19308	28.0097	0.985566	0.108272	0.10457		GO:0031638	0.00497951
GOTERM_BP_DIRECT	GO:0034622	cellular macromolecular complex assembly	3	3.19149	0.00543673	FGB, FGA, FGG	94	23	19308	26.7919	0.990229	0.115259	0.111317		GO:0034622	0.00543673
GOTERM_BP_DIRECT	GO:0045921	positive regulation of exocytosis	3	3.19149	0.00640657	FGB, FGA, FGG	94	25	19308	24.6485	0.995732	0.132507	0.127975		GO:0045921	0.00640657
GOTERM_CC_DIRECT	GO:0034364	high-density lipoprotein particle	3	3.19149	0.00659954	APOH, APOA2, APOA4	94	27	20562	24.305	0.6734	0.0619623	0.0564627		GO:0034364	0.00659954
GOTERM_BP_DIRECT	GO:1902042	negative regulation of extrinsic apoptotic signaling pathway via death domain receptors	3	3.19149	0.00799708	FGB, FGA, FGG	94	28	19308	22.0076	0.998905	0.154883	0.149587		GO:1902042	0.00799708
GOTERM_BP_DIRECT	GO:0008203	cholesterol metabolic process	4	4.25532	0.0080364	NSDHL, APOA2, ANGPTL3, APOA4	94	85	19308	9.66608	0.998941	0.154883	0.149587		GO:0008203	0.0080364
GOTERM_BP_DIRECT	GO:0001503	ossification	4	4.25532	0.0080364	COL1A1, ECM1, AHSG, EGFR	94	85	19308	9.66608	0.998941	0.154883	0.149587		GO:0001503	0.0080364
GOTERM_CC_DIRECT	GO:0005584	collagen type I trimer	2	2.12766	0.00902557	COL1A1, COL1A2	94	2	20562	218.745	0.78395	0.0762661	0.0694969		GO:0005584	0.00902557
GOTERM_CC_DIRECT	GO:0005601	classical-complement-pathway C3/C5 convertase complex	2	2.12766	0.00902557	CFB, C2	94	2	20562	218.745	0.78395	0.0762661	0.0694969		GO:0005601	0.00902557
GOTERM_BP_DIRECT	GO:0002542	Factor XII activation	2	2.12766	0.00961036	F12, KLKB1	94	2	19308	205.404	0.999725	0.181102	0.174909		GO:0002542	0.00961036
GOTERM_BP_DIRECT	GO:0006810	transport	3	3.19149	0.0103635	ALB, AFM, GC	94	32	19308	19.2566	0.999856	0.191049	0.184516		GO:0006810	0.0103635
GOTERM_BP_DIRECT	GO:2000352	negative regulation of endothelial cell apoptotic process	3	3.19149	0.0130005	FGB, FGA, FGG	94	36	19308	17.117	0.999985	0.234525	0.226504		GO:2000352	0.0130005
GOTERM_BP_DIRECT	GO:0042060	wound healing	4	4.25532	0.0135259	COL1A1, MACF1, COL3A1, EGFR	94	103	19308	7.97686	0.99999	0.234525	0.226504		GO:0042060	0.0135259
GOTERM_BP_DIRECT	GO:0042493	response to drug	6	6.38298	0.0136712	COL1A1, COL18A1, CPB2, APOA2, CTPS1, B2M	94	293	19308	4.20623	0.999992	0.234525	0.226504		GO:0042493	0.0136712
GOTERM_BP_DIRECT	GO:0051788	response to misfolded protein	2	2.12766	0.0143812	F12, CLU	94	3	19308	136.936	0.999995	0.234525	0.226504		GO:0051788	0.0143812
GOTERM_BP_DIRECT	GO:0034756	regulation of iron ion transport	2	2.12766	0.0143812	TF, B2M	94	3	19308	136.936	0.999995	0.234525	0.226504		GO:0034756	0.0143812
GOTERM_BP_DIRECT	GO:0002034	regulation of blood vessel diameter by renin-angiotensin	2	2.12766	0.0143812	SERPINF2, AGT	94	3	19308	136.936	0.999995	0.234525	0.226504		GO:0002034	0.0143812
GOTERM_CC_DIRECT	GO:0034774	secretory granule lumen	4	4.25532	0.015361	CFD, C3, TF, AHSG	94	115	20562	7.60851	0.926917	0.12362	0.112647		GO:0034774	0.015361
GOTERM_BP_DIRECT	GO:0061844	antimicrobial humoral immune response mediated by antimicrobial peptide	4	4.25532	0.0157292	REG3G, HRG, B2M, KNG1	94	109	19308	7.53777	0.999999	0.251667	0.24306		GO:0061844	0.0157292
GOTERM_BP_DIRECT	GO:0042311	vasodilation	3	3.19149	0.0166605	KNG1, EGFR, AGT	94	41	19308	15.0296	0.999999	0.261632	0.252685		GO:0042311	0.0166605
GOTERM_BP_DIRECT	GO:0055072	iron ion homeostasis	3	3.19149	0.0174394	TF, B2M, CP	94	42	19308	14.6717	1	0.267793	0.258635		GO:0055072	0.0174394
GOTERM_BP_DIRECT	GO:0007155	cell adhesion	8	8.51064	0.0176845	FGB, COL1A1, VTN, COL18A1, AZGP1, AMBP, DPT, COL8A1	94	555	19308	2.96078	1	0.267793	0.258635		GO:0007155	0.0176845
GOTERM_BP_DIRECT	GO:1900026	positive regulation of substrate adhesion-dependent cell spreading	3	3.19149	0.0190426	FGB, FGA, FGG	94	44	19308	14.0048	1	0.2833	0.273611		GO:1900026	0.0190426
GOTERM_BP_DIRECT	GO:0070527	platelet aggregation	3	3.19149	0.0198666	FGB, FGA, FGG	94	45	19308	13.6936	1	0.290463	0.28053		GO:0070527	0.0198666
GOTERM_MF_DIRECT	GO:0005543	phospholipid binding	4	4.25532	0.0215105	F10, APOH, APOA2, APOA4	94	120	18869	6.69113	0.990262	0.270779	0.25686		GO:0005543	0.0215105
GOTERM_BP_DIRECT	GO:0050821	protein stabilization	5	5.31915	0.0217895	APOA2, AFM, PFN1, CLU, CPN2	94	220	19308	4.66828	1	0.313178	0.302468		GO:0050821	0.0217895
GOTERM_BP_DIRECT	GO:0016525	negative regulation of angiogenesis	4	4.25532	0.0230102	SERPINF1, APOH, HRG, AGT	94	126	19308	6.52077	1	0.321094	0.310113		GO:0016525	0.0230102
GOTERM_BP_DIRECT	GO:0051180	vitamin transport	2	2.12766	0.0238548	AFM, GC	94	5	19308	82.1617	1	0.321094	0.310113		GO:0051180	0.0238548
GOTERM_BP_DIRECT	GO:0003331	positive regulation of extracellular matrix constituent secretion	2	2.12766	0.0238548	CPB2, AGT	94	5	19308	82.1617	1	0.321094	0.310113		GO:0003331	0.0238548
GOTERM_BP_DIRECT	GO:0030300	regulation of intestinal cholesterol absorption	2	2.12766	0.0238548	APOA2, APOA4	94	5	19308	82.1617	1	0.321094	0.310113		GO:0030300	0.0238548
GOTERM_BP_DIRECT	GO:0050830	defense response to Gram-positive bacterium	4	4.25532	0.0244555	CRP, RNASE4, REG3G, B2M	94	129	19308	6.36912	1	0.323458	0.312396		GO:0050830	0.0244555
GOTERM_BP_DIRECT	GO:0070374	positive regulation of ERK1 and ERK2 cascade	5	5.31915	0.0247933	FGB, FGA, SERPINF2, FGG, EGFR	94	229	19308	4.48481	1	0.323458	0.312396		GO:0070374	0.0247933
GOTERM_BP_DIRECT	GO:0050714	positive regulation of protein secretion	3	3.19149	0.0260389	FGB, FGA, FGG	94	52	19308	11.8502	1	0.334561	0.32312		GO:0050714	0.0260389
GOTERM_BP_DIRECT	GO:0001501	skeletal system development	4	4.25532	0.0280148	COL1A1, COL3A1, COL1A2, AHSG	94	136	19308	6.0413	1	0.354575	0.342449		GO:0001501	0.0280148
GOTERM_BP_DIRECT	GO:0043152	induction of bacterial agglutination	2	2.12766	0.0285578	FGB, FGA	94	6	19308	68.4681	1	0.356133	0.343954		GO:0043152	0.0285578
GOTERM_MF_DIRECT	GO:0060228	phosphatidylcholine-sterol O-acyltransferase activator activity	2	2.12766	0.0292141	APOA2, APOA4	94	6	18869	66.9113	0.998192	0.347324	0.329471		GO:0060228	0.0292141
GOTERM_BP_DIRECT	GO:0006955	immune response	7	7.44681	0.0315625	C3, VTN, AZGP1, IL1RAP, C8B, B2M, C8A	94	492	19308	2.92242	1	0.386016	0.372815		GO:0006955	0.0315625
GOTERM_BP_DIRECT	GO:0006879	cellular iron ion homeostasis	3	3.19149	0.0318646	HPX, TF, CP	94	58	19308	10.6244	1	0.386016	0.372815		GO:0006879	0.0318646
GOTERM_BP_DIRECT	GO:0071281	cellular response to iron ion	2	2.12766	0.0332384	TF, B2M	94	7	19308	58.6869	1	0.38989	0.376556		GO:0071281	0.0332384
GOTERM_BP_DIRECT	GO:0050996	positive regulation of lipid catabolic process	2	2.12766	0.0332384	APOA2, ANGPTL3	94	7	19308	58.6869	1	0.38989	0.376556		GO:0050996	0.0332384
GOTERM_BP_DIRECT	GO:0001525	angiogenesis	5	5.31915	0.0335636	COL18A1, ECM1, ANGPTL3, COL8A1, HRG	94	252	19308	4.07548	1	0.38989	0.376556		GO:0001525	0.0335636
GOTERM_CC_DIRECT	GO:0034366	spherical high-density lipoprotein particle	2	2.12766	0.0356216	APOA2, CLU	94	8	20562	54.6862	0.997823	0.261741	0.23851		GO:0034366	0.0356216
GOTERM_CC_DIRECT	GO:1990712	HFE-transferrin receptor complex	2	2.12766	0.0356216	TF, B2M	94	8	20562	54.6862	0.997823	0.261741	0.23851		GO:1990712	0.0356216
GOTERM_BP_DIRECT	GO:0065003	macromolecular complex assembly	4	4.25532	0.0371276	FGB, FGA, FGG, IL1RAP	94	152	19308	5.40538	1	0.406789	0.392878		GO:0065003	0.0371276
GOTERM_BP_DIRECT	GO:0008228	opsonization	2	2.12766	0.0378966	C4B, CRP	94	8	19308	51.3511	1	0.406789	0.392878		GO:0008228	0.0378966
GOTERM_BP_DIRECT	GO:0015886	heme transport	2	2.12766	0.0378966	HPX, HRG	94	8	19308	51.3511	1	0.406789	0.392878		GO:0015886	0.0378966
GOTERM_BP_DIRECT	GO:1900121	negative regulation of receptor binding	2	2.12766	0.0378966	ADIPOQ, B2M	94	8	19308	51.3511	1	0.406789	0.392878		GO:1900121	0.0378966
GOTERM_BP_DIRECT	GO:0010757	negative regulation of plasminogen activation	2	2.12766	0.0378966	CPB2, SERPINF2	94	8	19308	51.3511	1	0.406789	0.392878		GO:0010757	0.0378966
GOTERM_BP_DIRECT	GO:0007597	blood coagulation, intrinsic pathway	2	2.12766	0.0378966	F12, APOH	94	8	19308	51.3511	1	0.406789	0.392878		GO:0007597	0.0378966
GOTERM_CC_DIRECT	GO:0031232	extrinsic component of external side of plasma membrane	2	2.12766	0.0399851	TF, PLG	94	9	20562	48.6099	0.998988	0.270299	0.246308		GO:0031232	0.0399851
GOTERM_CC_DIRECT	GO:0042824	MHC class I peptide loading complex	2	2.12766	0.0399851	ABCB9, B2M	94	9	20562	48.6099	0.998988	0.270299	0.246308		GO:0042824	0.0399851
GOTERM_BP_DIRECT	GO:0042698	ovulation cycle	2	2.12766	0.0425327	SERPINF1, EGFR	94	9	19308	45.6454	1	0.450846	0.435428		GO:0042698	0.0425327
GOTERM_MF_DIRECT	GO:0005178	integrin binding	4	4.25532	0.0453347	VTN, COL3A1, ANGPTL3, EGFR	94	161	18869	4.98718	0.999949	0.500227	0.474515		GO:0005178	0.0453347
GOTERM_MF_DIRECT	GO:0050839	cell adhesion molecule binding	3	3.19149	0.0467502	FGB, FGA, FGG	94	70	18869	8.60289	0.999963	0.500227	0.474515		GO:0050839	0.0467502
GOTERM_BP_DIRECT	GO:0051006	positive regulation of lipoprotein lipase activity	2	2.12766	0.0471466	APOH, APOA4	94	10	19308	41.0809	1	0.493584	0.476705		GO:0051006	0.0471466
GOTERM_BP_DIRECT	GO:0006954	inflammatory response	6	6.38298	0.0489053	C4B, CRP, C3, ECM1, IL1RAP, KNG1	94	412	19308	2.99132	1	0.505752	0.488456		GO:0006954	0.0489053
GOTERM_CC_DIRECT	GO:0005769	early endosome	5	5.31915	0.0511812	TF, VPS8, APOA2, ANGPTL3, APOA4	94	308	20562	3.55105	0.999861	0.332678	0.30315		GO:0005769	0.0511812
GOTERM_BP_DIRECT	GO:0019885	antigen processing and presentation of endogenous peptide antigen via MHC class I	2	2.12766	0.0517385	ABCB9, B2M	94	11	19308	37.3462	1	0.524775	0.506829		GO:0019885	0.0517385
GOTERM_BP_DIRECT	GO:0007584	response to nutrient	3	3.19149	0.0519825	SERPINC1, ADIPOQ, C2	94	76	19308	8.10806	1	0.524775	0.506829		GO:0007584	0.0519825
GOTERM_BP_DIRECT	GO:0051838	cytolysis by host of symbiont cells	2	2.12766	0.0563086	REG3G, HRG	94	12	19308	34.234	1	0.536513	0.518166		GO:0051838	0.0563086
GOTERM_BP_DIRECT	GO:0046425	regulation of JAK-STAT cascade	2	2.12766	0.0563086	MST1, ELP2	94	12	19308	34.234	1	0.536513	0.518166		GO:0046425	0.0563086
GOTERM_BP_DIRECT	GO:0033700	phospholipid efflux	2	2.12766	0.0563086	APOA2, APOA4	94	12	19308	34.234	1	0.536513	0.518166		GO:0033700	0.0563086
GOTERM_BP_DIRECT	GO:0034380	high-density lipoprotein particle assembly	2	2.12766	0.0563086	APOA2, APOA4	94	12	19308	34.234	1	0.536513	0.518166		GO:0034380	0.0563086
GOTERM_BP_DIRECT	GO:0043589	skin morphogenesis	2	2.12766	0.0563086	COL1A1, COL1A2	94	12	19308	34.234	1	0.536513	0.518166		GO:0043589	0.0563086
GOTERM_CC_DIRECT	GO:0005886	plasma membrane	31	32.9787	0.0597117	MACF1, ITIH4, PHLDB1, SERPINC1, GRIK5, PROS1, PLG, IL1RAP, C8B, C8A, EGFR, KNG1, C3, C4B, C6, C9, B2M, FGB, FGA, AMBP, F10, YIPF3, F12, FGG, CP, MYO1E, TF, TMX3, HRG, KLKB1, CFB	94	5071	20562	1.33723	0.99997	0.373751	0.340578		GO:0005886	0.0597117
GOTERM_BP_DIRECT	GO:0010745	negative regulation of macrophage derived foam cell differentiation	2	2.12766	0.0608569	CRP, ADIPOQ	94	13	19308	31.6007	1	0.567106	0.547712		GO:0010745	0.0608569
GOTERM_BP_DIRECT	GO:0019430	removal of superoxide radicals	2	2.12766	0.0608569	APOA4, SOD3	94	13	19308	31.6007	1	0.567106	0.547712		GO:0019430	0.0608569
GOTERM_BP_DIRECT	GO:0071333	cellular response to glucose stimulus	3	3.19149	0.0646585	CPB2, GRIK5, SERPINF1	94	86	19308	7.16526	1	0.595209	0.574854		GO:0071333	0.0646585
GOTERM_MF_DIRECT	GO:0005198	structural molecule activity	4	4.25532	0.0651097	FGB, FGA, MACF1, FGG	94	187	18869	4.29378	0.999999	0.663498	0.629393		GO:0005198	0.0651097
GOTERM_BP_DIRECT	GO:0050777	negative regulation of immune response	2	2.12766	0.0653834	COL3A1, AMBP	94	14	19308	29.3435	1	0.595209	0.574854		GO:0050777	0.0653834
GOTERM_BP_DIRECT	GO:0071260	cellular response to mechanical stimulus	3	3.19149	0.0659783	COL1A1, EGFR, AGT	94	87	19308	7.08291	1	0.595209	0.574854		GO:0071260	0.0659783
GOTERM_CC_DIRECT	GO:0005604	basement membrane	3	3.19149	0.0689459	VTN, COL18A1, SERPINF1	94	95	20562	6.90773	0.999994	0.416138	0.379203		GO:0005604	0.0689459
GOTERM_BP_DIRECT	GO:0008285	negative regulation of cell proliferation	6	6.38298	0.0734586	COL18A1, AZGP1, IGFBP3, DPT, PLG, HRG	94	464	19308	2.65609	1	0.65018	0.627945		GO:0008285	0.0734586
GOTERM_BP_DIRECT	GO:0034375	high-density lipoprotein particle remodeling	2	2.12766	0.0743719	APOA2, APOA4	94	16	19308	25.6755	1	0.65018	0.627945		GO:0034375	0.0743719
GOTERM_BP_DIRECT	GO:0034374	low-density lipoprotein particle remodeling	2	2.12766	0.0743719	APOA2, AGT	94	16	19308	25.6755	1	0.65018	0.627945		GO:0034374	0.0743719
GOTERM_BP_DIRECT	GO:0050731	positive regulation of peptidyl-tyrosine phosphorylation	3	3.19149	0.0768524	VTN, ADIPOQ, AGT	94	95	19308	6.48645	1	0.661894	0.639259		GO:0050731	0.0768524
GOTERM_BP_DIRECT	GO:0030194	positive regulation of blood coagulation	2	2.12766	0.0788341	F12, APOH	94	17	19308	24.1652	1	0.661894	0.639259		GO:0030194	0.0788341
GOTERM_BP_DIRECT	GO:0030502	negative regulation of bone mineralization	2	2.12766	0.0788341	ECM1, AHSG	94	17	19308	24.1652	1	0.661894	0.639259		GO:0030502	0.0788341
GOTERM_BP_DIRECT	GO:0009395	phospholipid catabolic process	2	2.12766	0.0788341	APOA2, ANGPTL3	94	17	19308	24.1652	1	0.661894	0.639259		GO:0009395	0.0788341
GOTERM_BP_DIRECT	GO:0045721	negative regulation of gluconeogenesis	2	2.12766	0.0876946	MST1, ADIPOQ	94	19	19308	21.6215	1	0.72199	0.6973		GO:0045721	0.0876946
GOTERM_BP_DIRECT	GO:0010812	negative regulation of cell-substrate adhesion	2	2.12766	0.0876946	COL1A1, PLG	94	19	19308	21.6215	1	0.72199	0.6973		GO:0010812	0.0876946
GOTERM_MF_DIRECT	GO:0043395	heparan sulfate proteoglycan binding	2	2.12766	0.0896463	CFH, HRG	94	19	18869	21.1299	1	0.872014	0.827191		GO:0043395	0.0896463
GOTERM_BP_DIRECT	GO:0042632	cholesterol homeostasis	3	3.19149	0.0897051	APOA2, ANGPTL3, APOA4	94	104	19308	5.92512	1	0.72986	0.7049		GO:0042632	0.0897051
GOTERM_BP_DIRECT	GO:0042310	vasoconstriction	2	2.12766	0.0920932	CRP, AGT	94	20	19308	20.5404	1	0.72986	0.7049		GO:0042310	0.0920932
GOTERM_BP_DIRECT	GO:0090501	RNA phosphodiester bond hydrolysis	2	2.12766	0.0920932	AZGP1, RNASE4	94	20	19308	20.5404	1	0.72986	0.7049		GO:0090501	0.0920932
GOTERM_BP_DIRECT	GO:0060716	labyrinthine layer blood vessel development	2	2.12766	0.0920932	NSDHL, PLG	94	20	19308	20.5404	1	0.72986	0.7049		GO:0060716	0.0920932
GOTERM_MF_DIRECT	GO:0016209	antioxidant activity	2	2.12766	0.0986072	ALB, APOA4	94	21	18869	19.1175	1	0.917476	0.870316		GO:0016209	0.0986072

## Sheet: KStudy2_PlasmaStudy2_Up
Rivigo GO reduction	Kidney - Plasma study 2 - proteomics upregulated
Category	GO	Term	Count	%	PValue	Genes	List Total	Pop Hits	Pop Total	Fold Enrichment	Bonferroni	Benjamini	FDR		GO	PValue
GOTERM_CC_DIRECT	GO:0005576	extracellular region	9	100	1.30544e-08	C4B, ITIH2, CFH, SERPINF1, APOH, CD5L, FBLN1, F13B, CFP	9	2129	20562	9.65806	3.52468e-07	3.52468e-07	3.26359e-07		GO:0005576	1.30544e-08
GOTERM_CC_DIRECT	GO:0005615	extracellular space	8	88.8889	4.80385e-07	C4B, CFH, SERPINF1, APOH, CD5L, FBLN1, F13B, CFP	9	1938	20562	9.43103	1.29703e-05	6.48519e-06	6.00481e-06		GO:0005615	4.80385e-07
GOTERM_CC_DIRECT	GO:0072562	blood microparticle	4	44.4444	1.87435e-05	C4B, ITIH2, CFH, CD5L	9	145	20562	63.0253	0.000505951	0.000168692	0.000156196		GO:0072562	1.87435e-05
GOTERM_BP_DIRECT	GO:0006956	complement activation	3	33.3333	4.48525e-05	C4B, CFH, CFP	9	25	19308	257.44	0.00340307	0.00336394	0.00327424		GO:0006956	4.48525e-05
GOTERM_CC_DIRECT	GO:0070062	extracellular exosome	6	66.6667	0.00061492	C4B, ITIH2, CFH, SERPINF1, APOH, FBLN1	9	2218	20562	6.18034	0.0164708	0.00415071	0.00384325		GO:0070062	0.00061492
GOTERM_BP_DIRECT	GO:0010951	negative regulation of endopeptidase activity	3	33.3333	0.00154332	C4B, ITIH2, SERPINF1	9	146	19308	44.0822	0.110755	0.0543225	0.0528739		GO:0010951	0.00154332
GOTERM_BP_DIRECT	GO:0072378	blood coagulation, fibrin clot formation	2	22.2222	0.0028972	FBLN1, F13B	9	7	19308	612.952	0.197888	0.0543225	0.0528739		GO:0072378	0.0028972
GOTERM_BP_DIRECT	GO:0030449	regulation of complement activation	2	22.2222	0.0028972	CFH, CD5L	9	7	19308	612.952	0.197888	0.0543225	0.0528739		GO:0030449	0.0028972
GOTERM_BP_DIRECT	GO:0006957	complement activation, alternative pathway	2	22.2222	0.00702331	CFH, CFP	9	17	19308	252.392	0.414714	0.10535	0.10254		GO:0006957	0.00702331
GOTERM_BP_DIRECT	GO:0010596	negative regulation of endothelial cell migration	2	22.2222	0.0103134	SERPINF1, APOH	9	25	19308	171.627	0.545197	0.128918	0.12548		GO:0010596	0.0103134
GOTERM_MF_DIRECT	GO:0004866	endopeptidase inhibitor activity	2	22.2222	0.0165777	C4B, ITIH2	8	45	18869	104.828	0.307721	0.381287	0.381287		GO:0004866	0.0165777
GOTERM_CC_DIRECT	GO:0005604	basement membrane	2	22.2222	0.0363753	SERPINF1, FBLN1	9	95	20562	48.0982	0.632283	0.196427	0.181876		GO:0005604	0.0363753
GOTERM_MF_DIRECT	GO:0004867	serine-type endopeptidase inhibitor activity	2	22.2222	0.0375966	ITIH2, SERPINF1	8	103	18869	45.7985	0.569615	0.432361	0.432361		GO:0004867	0.0375966
GOTERM_BP_DIRECT	GO:0016525	negative regulation of angiogenesis	2	22.2222	0.0510384	SERPINF1, APOH	9	126	19308	34.0529	0.981341	0.54684	0.532258		GO:0016525	0.0510384
GOTERM_MF_DIRECT	GO:0008201	heparin binding	2	22.2222	0.0635032	CFH, APOH	8	176	18869	26.8026	0.763877	0.486858	0.486858		GO:0008201	0.0635032

[truncated: 7 more sheets: KStudy2_PlasmaStudy2_down, KStudy2_KStudy2_trans_Up, KStudy2_KStudy2_trans_Down, KStudy1_KStudy1_Trans_up, KStudy1_KStudy1_Trans_down, K_Trans_Prot_S1_S2_intersec_up, K_Trans_Prot_S1_S2_intersec_dow]
